# Supplementary material for: Cytogenetic and Transcriptomic Analysis of Human Endometrial MSC Retaining Proliferative Activity after Sublethal Heat Shock
Source: MDPI journal article supplement (doi:10.3390/cells7110184), 2018-10-25

# Supplementary Table 1.

The limma voom-quantile normalized expression levels of control and SHS-SP eMSC (log2).

| NCBI_id | control_1    | control_2 | control_3    | SHS-SP_1     | SHS-SP_2     | SHS-SP_3     |
|---------|--------------|-----------|--------------|--------------|--------------|--------------|
| 1       | 5.498944719  | 5.873346  | 5.124543452  | 5.55876787   | 5.588224375  | 5.529311366  |
| 2       | -0.352108471 | -0.352108 | -0.352108471 | 7.085333103  | 4.927679215  | 2.770025327  |
| 14      | 5.749402114  | 5.5109155 | 5.987888748  | 7.119845432  | 6.606183222  | 6.863014327  |
| 16      | 8.507545809  | 4.9640136 | 6.735779686  | 6.932030641  | 5.539811681  | 6.235921161  |
| 19      | 5.759644951  | 5.9391922 | 6.118739492  | -0.352108471 | -0.352108471 | -0.352108471 |
| 20      | 4.813611796  | 6.3968684 | 7.980124969  | 4.141880939  | 3.771324033  | 3.400767127  |
| 21      | 5.284974356  | 6.3585275 | 4.211421254  | -0.352108471 | -0.352108471 | -0.352108471 |
| 23      | 4.947007189  | 4.9799919 | 4.914022459  | 6.822208827  | 6.841511354  | 6.802906299  |
| 27      | 8.375043057  | 10.663551 | 6.086534978  | 7.114489208  | 6.128734228  | 8.100244189  |
| 29      | -0.352108471 | -0.352108 | -0.352108471 | 6.470706794  | 6.545950789  | 6.621194783  |
| 32      | 6.988736991  | 6.5851844 | 6.181631761  | -0.352108471 | -0.352108471 | -0.352108471 |
| 36      | 9.985415816  | 8.1928158 | 9.089115811  | 8.201776207  | 7.642442186  | 7.922109197  |
| 37      | -0.352108471 | -0.352108 | -0.352108471 | 8.926349609  | 7.389533528  | 8.157941569  |
| 47      | 1.392109249  | 3.136327  | -0.352108471 | 3.151146871  | 3.177797522  | 3.12449622   |
| 48      | 6.830448955  | 6.502263  | 6.174077101  | 2.089170226  | 8.790664649  | 5.439917437  |
| 50      | -0.352108471 | -0.352108 | -0.352108471 | 5.903760504  | 5.926961306  | 5.880559702  |
| 51      | 9.456984442  | 6.8163048 | 4.175625127  | 3.752620143  | 3.661624855  | 3.570629566  |
| 53      | 6.433318728  | 6.4453648 | 6.421272681  | 4.178899946  | 4.245214285  | 4.112585606  |
| 59      | 8.355311288  | 7.6994178 | 8.027364562  | 9.93141753   | 9.874056381  | 9.988778679  |
| 60      | 12.84789093  | 12.25982  | 13.43596189  | 14.64105918  | 14.46262557  | 14.28419196  |
| 71      | 11.09860229  | 10.766393 | 11.43081133  | 12.09160162  | 10.00423616  | 14.17896707  |
| 72      | 9.43473142   | 9.9468876 | 9.690809527  | 11.86516115  | 7.490422799  | 9.677791973  |
| 81      | 8.092283664  | 7.3887488 | 8.795818545  | 7.992216534  | 9.865303151  | 11.73838977  |
| 87      | 9.684451926  | 8.4537991 | 7.223146352  | 8.255643145  | 13.61139711  | 10.93352013  |
| 91      | 5.017136436  | 4.5152298 | 5.519043066  | -0.352108471 | -0.352108471 | -0.352108471 |
| 93      | 6.651724224  | 4.6929891 | 2.734254014  | 4.704154739  | 5.416430737  | 5.060292738  |
| 100     | -0.352108471 | -0.352108 | -0.352108471 | 6.056053999  | 5.531438525  | 6.580669473  |
| 101     | 5.754553399  | 5.3152588 | 6.193847962  | -0.352108471 | -0.352108471 | -0.352108471 |
| 102     | -0.352108471 | -0.352108 | -0.352108471 | 6.590036833  | 6.810957895  | 7.031878957  |
| 103     | 5.295280088  | 5.2849744 | 5.274668624  | 6.804723141  | 7.655057176  | 5.954389107  |
| 105     | 4.13408305   | 4.9140225 | 3.354143641  | 0.289051906  | -0.352108471 | 0.930212283  |
| 114     | -0.352108471 | -0.352108 | -0.352108471 | 2.351086241  | 3.255950465  | 1.446222016  |
| 115     | -0.352108471 | -0.352108 | -0.352108471 | 5.980334028  | 5.351960992  | 6.608707064  |
| 118     | 6.801813774  | 6.8152071 | 6.788420481  | 7.387215402  | 7.407655215  | 7.366775589  |
| 123     | 5.853283936  | 5.2642518 | 5.55876787   | 3.32030891   | 7.178522138  | 11.03673537  |
| 128     | -0.352108471 | -0.352108 | -0.352108471 | 9.979463217  | 4.759148467  | 7.369305842  |
| 132     | 6.332466669  | 3.7097133 | 8.955220043  | 5.052267685  | 7.335513206  | 2.769022165  |
| 133     | 10.26905022  | 8.1755796 | 9.222314905  | 10.692977    | 7.793854929  | 9.243415966  |
| 136     | -0.352108471 | -0.352108 | -0.352108471 | 8.078823743  | 4.659489439  | 6.369156591  |
| 141     | 6.433318728  | 6.6296792 | 6.23695821   | -0.352108471 | -0.352108471 | -0.352108471 |
| 142     | -0.352108471 | -0.352108 | -0.352108471 | 8.375904556  | 8.392497989  | 8.359311122  |
| 143     | 6.212536209  | 6.802189  | 5.622883451  | -0.352108471 | -0.352108471 | -0.352108471 |

|     |              |           |              |              |              |              |
|-----|--------------|-----------|--------------|--------------|--------------|--------------|
| 146 | 7.334122775  | 7.3654996 | 7.302745947  | -0.352108471 | -0.352108471 | -0.352108471 |
| 147 | 6.463674915  | 5.9872832 | 6.94006665   | -0.352108471 | -0.352108471 | -0.352108471 |
| 148 | 5.95559053   | 6.6400194 | 7.324448256  | -0.352108471 | -0.352108471 | -0.352108471 |
| 153 | 9.416826983  | 2.1319137 | 5.774370319  | -0.352108471 | -0.352108471 | -0.352108471 |
| 156 | 5.463922025  | 5.5293114 | 5.398532684  | 5.494417177  | 5.494417177  | 5.494417177  |
| 157 | 6.061691422  | 7.3209677 | 6.691329572  | 4.23879782   | 6.190805163  | 8.142812505  |
| 158 | -0.352108471 | -0.352108 | -0.352108471 | 4.388315565  | 3.245625856  | 2.102936146  |
| 160 | 5.420657276  | 3.9184181 | 2.416178924  | 7.995294036  | 8.245819749  | 7.744768323  |
| 161 | 3.987750338  | 3.1277379 | 2.267725412  | 7.340618328  | 6.915799893  | 6.490981459  |
| 162 | 7.54201368   | 7.2665096 | 7.817517777  | 9.518347022  | 6.74407332   | 3.969799619  |
| 163 | 5.940575529  | 7.0224724 | 6.481523945  | 8.622155348  | 6.343488979  | 7.482822164  |
| 164 | 6.767951819  | 8.5084058 | 5.027497824  | 6.588485208  | 6.889813725  | 6.739149467  |
| 165 | 7.360780676  | 8.273972  | 6.447589338  | 3.95724469   | 6.32531018   | 8.69337567   |
| 166 | 8.009623545  | 8.9052606 | 7.113986506  | 9.010141782  | 7.429082739  | 10.59120083  |
| 176 | 2.769242222  | 2.262153  | 2.515697587  | -0.352108471 | -0.352108471 | -0.352108471 |
| 186 | -0.352108471 | -0.352108 | -0.352108471 | 4.934492169  | 5.7359272    | 5.335209685  |
| 191 | 7.251757684  | 7.1096209 | 7.393894455  | 8.216996418  | 7.38669897   | 6.556401523  |
| 196 | 8.099059847  | 5.7302292 | 6.914644543  | 8.281500709  | 6.68898917   | 5.096477631  |
| 202 | -0.352108471 | -0.352108 | -0.352108471 | 1.383520155  | 3.119148782  | -0.352108471 |
| 203 | 5.993092449  | 6.7441214 | 6.368606935  | 5.93669218   | 6.694006421  | 7.451320663  |
| 204 | 5.958359385  | 6.6404746 | 5.276244216  | 8.496512176  | 7.054600764  | 5.612689352  |
| 205 | -0.352108471 | -0.352108 | -0.352108471 | 0.874413692  | -0.352108471 | 2.100935855  |
| 208 | -0.352108471 | -0.352108 | -0.352108471 | 6.560204177  | 8.321844961  | 4.798563393  |
| 210 | 5.75668      | 6.3180937 | 6.879507361  | 5.233567424  | 3.886315413  | 6.580819434  |
| 211 | 1.996581495  | 3.3748827 | 2.685732087  | 4.570755367  | 2.124237496  | -0.322280375 |
| 214 | -0.352108471 | -0.352108 | -0.352108471 | 2.571154353  | 5.494417177  | -0.352108471 |
| 215 | -0.352108471 | -0.352108 | -0.352108471 | 5.55876787   | 7.797988557  | 3.319547183  |
| 216 | 4.730615771  | 4.617923  | 4.843308497  | 7.713028572  | 7.733387404  | 7.692669739  |
| 218 | 6.736748339  | 6.0307241 | 5.324699835  | -0.352108471 | -0.352108471 | -0.352108471 |
| 219 | 7.195849524  | 5.1263858 | 9.265313239  | 6.344555562  | 5.656835755  | 7.032275369  |
| 220 | 6.536037335  | 6.7440015 | 6.640019393  | -0.352108471 | -0.352108471 | -0.352108471 |
| 221 | 6.977475365  | 5.4283627 | 8.526588063  | 7.431698237  | 5.285920678  | 6.358809458  |
| 223 | 5.5220932    | 6.2248629 | 6.927632549  | 4.07228332   | 8.828322355  | 6.450302837  |
| 226 | 10.10924753  | 9.4304235 | 10.78807157  | 10.0301857   | 12.64585698  | 7.414514428  |
| 230 | -0.352108471 | -0.352108 | -0.352108471 | 5.022802207  | 6.354443088  | 5.688622647  |
| 231 | 8.981447581  | 5.5568597 | 7.269153621  | 10.41406676  | 7.083829938  | 8.748948349  |
| 239 | -0.352108471 | -0.352108 | -0.352108471 | 0.897715333  | -0.352108471 | 2.147539136  |
| 258 | -0.352108471 | -0.352108 | -0.352108471 | 2.252618212  | 2.655049751  | 1.850186673  |
| 262 | 9.209545952  | 6.2510559 | 7.730300925  | -0.352108471 | -0.352108471 | -0.352108471 |
| 267 | -0.26064198  | 3.1277379 | 6.516117731  | 9.112842831  | 7.295045874  | 5.477248917  |
| 269 | -0.352108471 | -0.352108 | -0.352108471 | 1.964002179  | 0.808855576  | 3.119148782  |
| 271 | 4.021726945  | 4.0103646 | 4.016045771  | 6.296043865  | 4.217085872  | 8.375001859  |
| 272 | 7.094235505  | 6.0537025 | 6.573968999  | 0.82273449   | -0.352108471 | 1.997577452  |
| 274 | 5.853275199  | 6.991795  | 8.130314896  | 5.93842295   | 5.050411404  | 5.494417177  |
| 285 | 3.931233873  | 4.8215393 | 5.711844708  | 5.545830322  | 5.432742342  | 5.319654363  |
| 290 | 7.450449055  | 8.2816111 | 6.619286969  | 8.917868772  | 7.76913794   | 6.620407108  |
| 291 | 3.945140305  | 5.2712224 | 4.60818135   | 8.457196657  | 5.636441802  | 7.04681923   |

|     |              |           |              |              |              |              |
|-----|--------------|-----------|--------------|--------------|--------------|--------------|
| 292 | 7.259391142  | 7.1562852 | 7.207838162  | 6.322936265  | 8.531660807  | 7.427298536  |
| 293 | 8.12782046   | 6.4143432 | 9.841297688  | 9.482999764  | 9.322656311  | 9.402828037  |
| 301 | 8.137867046  | 8.1635425 | 8.112191629  | 8.200565503  | 8.204591974  | 8.196539031  |
| 302 | 10.98660727  | 10.410703 | 10.69865532  | 11.37003559  | 11.34383116  | 11.39624002  |
| 304 | 5.688622647  | 4.5914138 | 6.785831478  | 5.070633386  | 1.529833188  | 3.300233287  |
| 307 | -0.352108471 | -0.352108 | -0.352108471 | 7.49141599   | 6.671874638  | 5.852333286  |
| 308 | 11.42953087  | 8.4032725 | 9.916401704  | 8.899837123  | 9.776837824  | 10.65383852  |
| 309 | 6.67196754   | 7.6348588 | 5.709076289  | 8.534046201  | 8.521503837  | 8.508961472  |
| 310 | -0.352108471 | -0.352108 | -0.352108471 | 6.207862328  | 7.036396027  | 7.864929725  |
| 311 | 7.503651391  | 7.7121014 | 7.29520141   | 6.635453109  | 6.617035395  | 6.653870824  |
| 317 | 3.680058553  | 4.3280654 | 4.976072197  | 0.228373553  | 0.808855576  | -0.352108471 |
| 321 | -0.352108471 | -0.352108 | -0.352108471 | 6.198777144  | 6.706465951  | 7.214154759  |
| 322 | 6.864403563  | 5.3546856 | 3.844967735  | -0.352108471 | -0.352108471 | -0.352108471 |
| 323 | -0.352108471 | -0.352108 | -0.352108471 | 5.081130375  | 6.396868383  | 7.71260639   |
| 324 | 5.980334028  | 5.785085  | 6.175583018  | 0.440372779  | 0.440372779  | 0.440372779  |
| 325 | -0.352108471 | -0.352108 | -0.352108471 | 0.95025487   | 2.252618212  | -0.352108471 |
| 327 | 5.217491139  | 6.7680071 | 3.666975149  | 4.132568577  | 5.169157826  | 6.205747074  |
| 328 | 4.645411718  | 6.2570463 | 7.868680968  | 6.124193068  | 7.281493784  | 8.4387945    |
| 329 | 6.502263028  | 3.9725992 | 9.031926895  | -0.352108471 | -0.352108471 | -0.352108471 |
| 331 | 9.261586072  | 9.1119908 | 9.411181337  | 7.861769608  | 8.216268226  | 7.507270991  |
| 332 | -0.352108471 | -0.352108 | -0.352108471 | 5.488932804  | 6.724891066  | 7.960849329  |
| 334 | 10.13474056  | 7.8724594 | 5.610178194  | 6.223332356  | 8.121597162  | 10.01986197  |
| 338 | 5.428393874  | 3.3246971 | 7.532090623  | -0.352108471 | -0.352108471 | -0.352108471 |
| 348 | 5.493783215  | 5.4582551 | 5.529311366  | 0.808855576  | 0.808855576  | 0.808855576  |
| 351 | -0.352108471 | -0.352108 | -0.352108471 | 8.459467544  | 8.646691615  | 8.272243472  |
| 353 | -0.352108471 | -0.352108 | -0.352108471 | 7.475171153  | 7.49196897   | 7.458373336  |
| 357 | -0.352108471 | -0.352108 | -0.352108471 | 0.849500091  | -0.352108471 | 2.051108653  |
| 360 | -0.352108471 | -0.352108 | -0.352108471 | 5.406707798  | 5.458255064  | 5.355160532  |
| 361 | 5.939192221  | 5.5342738 | 6.344110621  | -0.352108471 | -0.352108471 | -0.352108471 |
| 363 | 6.290509167  | 7.815472  | 7.052990603  | 5.861579664  | 5.529311366  | 6.193847962  |
| 367 | -0.352108471 | -0.352108 | -0.352108471 | 5.275824336  | 8.923588102  | 7.099706219  |
| 372 | 8.890026116  | 6.9241703 | 7.907098232  | 8.167328804  | 7.364389464  | 6.561450124  |
| 375 | 7.61514139   | 8.9182906 | 10.22143975  | 9.473509341  | 9.39930777   | 9.325106198  |
| 377 | 6.260977578  | 6.0908083 | 5.920639104  | 10.65856038  | 7.898410558  | 5.138260735  |
| 378 | 5.608610738  | 9.992351  | 7.800480868  | 6.458834491  | 10.01915343  | 8.238993959  |
| 379 | -0.352108471 | -0.352108 | -0.352108471 | 5.789762726  | 5.804293869  | 5.775231583  |
| 381 | 6.692933809  | 6.3691566 | 6.045379372  | 2.20456921   | 3.055408374  | 3.906247539  |
| 382 | 6.674128879  | 5.2100527 | 8.13820505   | 7.717952937  | 5.824707999  | 9.611197876  |
| 387 | 7.9386766    | 8.5985778 | 9.258478956  | 9.279792422  | 7.564747449  | 10.99483739  |
| 388 | 8.687750894  | 8.633343  | 8.578935183  | 12.25976023  | 5.146817762  | 8.703288996  |
| 389 | 9.164371527  | 9.161673  | 9.167070085  | 9.530068237  | 9.544611629  | 9.515524845  |
| 390 | 13.21877149  | 6.1498398 | 9.684305641  | 10.02570825  | 12.46515185  | 7.586264652  |
| 391 | 4.921426854  | 5.3546856 | 5.787944444  | 5.13952956   | 8.77302793   | 6.956278745  |
| 392 | 6.982138842  | 9.9833769 | 8.482757854  | 7.811627334  | 8.08488895   | 8.358150566  |
| 396 | 9.364505851  | 9.791867  | 9.57818642   | 9.667940649  | 7.414752691  | 11.92112861  |
| 400 | -0.352108471 | -0.352108 | -0.352108471 | 8.384281252  | 5.543702138  | 6.963991695  |
| 402 | 3.515141236  | 3.6761388 | 3.354143641  | 4.884610637  | 7.135358184  | 6.00998441   |

|     |              |           |              |              |              |              |
|-----|--------------|-----------|--------------|--------------|--------------|--------------|
| 403 | 6.090808341  | 5.2346703 | 6.946946418  | 6.497182024  | 2.612247117  | 10.38211693  |
| 405 | 3.127737875  | 3.6858981 | 2.569577624  | 8.174087603  | 6.434644758  | 4.695201913  |
| 408 | 5.800199788  | 5.308056  | 6.292343569  | -0.352108471 | -0.352108471 | -0.352108471 |
| 411 | 5.073617205  | 4.617923  | 5.529311366  | 5.605971047  | 5.054280952  | 6.157661143  |
| 412 | 5.106529895  | 5.3284524 | 5.217491139  | -0.352108471 | -0.352108471 | -0.352108471 |
| 414 | 3.515141236  | 3.6761388 | 3.354143641  | 6.235921161  | 6.246629235  | 6.225213087  |
| 420 | 5.118118228  | 5.2174911 | 5.31686405   | -0.352108471 | -0.352108471 | -0.352108471 |
| 427 | -0.352108471 | -0.352108 | -0.352108471 | 5.939192221  | 4.675625004  | 7.202759439  |
| 432 | 6.909491214  | 5.2174911 | 3.525491064  | -0.352108471 | -0.352108471 | -0.352108471 |
| 435 | -0.352108471 | -0.352108 | -0.352108471 | 7.329165582  | 5.080146934  | 6.204656258  |
| 438 | 2.239158726  | 4.8304259 | -0.352108471 | -0.352108471 | -0.352108471 | -0.352108471 |
| 439 | 5.066682906  | 4.6906481 | 4.878665478  | 8.876002641  | 6.666110637  | 7.771056639  |
| 444 | 4.890628796  | 4.4996979 | 4.108766905  | -0.352108471 | -0.352108471 | -0.352108471 |
| 445 | 7.663530734  | 3.9368688 | 5.800199788  | 0.440372779  | 0.440372779  | 0.440372779  |
| 463 | -0.352108471 | -0.352108 | -0.352108471 | 5.233567424  | 5.254689875  | 5.212444972  |
| 468 | 9.457065222  | 3.0570275 | 6.257046343  | 8.554431701  | 5.469789537  | 11.63907387  |
| 471 | 1.880238567  | 2.7034702 | 1.057006959  | 7.442293468  | 6.129992934  | 6.786143201  |
| 472 | 9.646048815  | 6.0199671 | 7.833007954  | 2.898183655  | 3.919505936  | 1.876861374  |
| 473 | -0.352108471 | -0.352108 | -0.352108471 | 2.16675574   | 2.232575625  | 2.100935855  |
| 475 | 7.359936979  | 6.1875446 | 6.77374078   | 6.533419766  | 6.285554459  | 6.037689151  |
| 476 | 0.953592283  | 1.6620152 | 2.370438077  | 2.252618212  | 2.132840388  | 2.372396036  |
| 477 | 5.940759291  | 5.6532998 | 6.228218771  | 4.340882501  | 3.615460478  | 5.066304524  |
| 478 | -0.352108471 | -0.352108 | -0.352108471 | 1.167362396  | 2.686833264  | -0.352108471 |
| 482 | 6.578185475  | 5.3713898 | 7.784981108  | 5.969272276  | 6.533156242  | 5.405388309  |
| 483 | 7.17777694   | 7.6716722 | 6.683881727  | 6.947225037  | 7.483004983  | 8.01878493   |
| 488 | 8.186333712  | 7.1522542 | 7.669293948  | 8.122214126  | 6.711695252  | 9.532732999  |
| 490 | -0.352108471 | -0.352108 | -0.352108471 | 4.158791148  | 5.290388732  | 4.72458994   |
| 491 | -0.352108471 | -0.352108 | -0.352108471 | 0.049668827  | 3.766938612  | 1.90830372   |
| 493 | 6.249497805  | 6.8018138 | 7.354129742  | 6.515493975  | 6.693937107  | 6.872380239  |
| 498 | 3.127737875  | 3.136327  | 3.119148782  | 9.081034608  | 9.082863108  | 9.079206108  |
| 501 | -0.352108471 | -0.352108 | -0.352108471 | 6.039960775  | 7.013360586  | 7.986760398  |
| 506 | 6.927852695  | 9.3478814 | 8.137867046  | 8.363135134  | 8.794263144  | 9.225391154  |
| 509 | 5.77793971   | 10.063575 | 7.92075757   | 7.730705218  | 7.49251651   | 7.254327801  |
| 513 | -0.352108471 | -0.352108 | -0.352108471 | 6.314855501  | 5.349381241  | 4.383906981  |
| 514 | -0.130115716 | 1.3921092 | 2.914334214  | 6.971719777  | 6.413975447  | 5.856231116  |
| 515 | 4.190287334  | 4.6499796 | 5.109671904  | 7.843714581  | 3.080683113  | 5.462198847  |
| 516 | -0.352108471 | -0.352108 | -0.352108471 | 6.12990004   | 6.135204448  | 6.124595632  |
| 517 | 6.197324086  | 8.2753551 | 7.236339591  | 6.594046641  | 8.408750976  | 7.501398809  |
| 518 | 6.556689902  | 4.7784383 | 8.334941473  | 6.773169268  | 9.393501154  | 8.083335211  |
| 521 | 6.40026323   | 7.5095361 | 5.290990324  | 2.204376426  | -0.352108471 | 4.760861323  |
| 522 | -0.352108471 | -0.352108 | -0.352108471 | 8.496595026  | 5.386616615  | 6.94160582   |
| 523 | 6.666809909  | 6.9959352 | 7.325060451  | 4.477947052  | 6.039058617  | 2.916835486  |
| 526 | 6.983643214  | 5.8100936 | 6.396868383  | 9.828742258  | 4.017847844  | 6.923295051  |
| 527 | 8.179775135  | 7.7509518 | 7.322128515  | 7.608785314  | 8.474905279  | 9.341025245  |
| 529 | 6.801813774  | 6.5092942 | 7.094333337  | 7.133055561  | 7.257115123  | 7.008995998  |
| 533 | 6.242048279  | 6.2558778 | 6.228218771  | 1.293955958  | 0.440372779  | 2.147539136  |
| 535 | 4.095303961  | 3.136327  | 5.054280952  | 0.044132154  | 0.440372779  | -0.352108471 |

|     |              |           |              |              |              |              |
|-----|--------------|-----------|--------------|--------------|--------------|--------------|
| 537 | 7.850078263  | 6.2767493 | 7.063413806  | 5.764101034  | 7.054600764  | 8.345100495  |
| 545 | 2.907929169  | 2.3521085 | 3.167966808  | -0.352108471 | -0.352108471 | -0.352108471 |
| 546 | -0.352108471 | -0.352108 | -0.352108471 | 4.953000063  | 3.314032311  | 1.675064559  |
| 550 | -0.352108471 | -0.352108 | -0.352108471 | 5.704335255  | 5.715557343  | 5.693113166  |
| 552 | 7.090140524  | 6.6903025 | 6.29046443   | 1.434979174  | -0.260288665 | 3.130247014  |
| 558 | 5.536335589  | 8.8499125 | 7.193124059  | 8.644778721  | 8.754362158  | 8.535195284  |
| 567 | 6.792524508  | 7.6476165 | 8.502708572  | 9.019842152  | 9.6608816    | 8.378802703  |
| 570 | 5.017136436  | 5.3751815 | 4.659091321  | -0.352108471 | -0.352108471 | -0.352108471 |
| 572 | 5.800199788  | 1.7608913 | 9.839508267  | 9.012929553  | 6.556689902  | 4.10045025   |
| 573 | 5.002970041  | 5.4527237 | 5.902477441  | 6.641081844  | 4.80208491   | 2.963087977  |
| 578 | 5.089412202  | 5.1245435 | 5.054280952  | 5.55876787   | 5.588224375  | 5.529311366  |
| 581 | 6.183964016  | 9.1800156 | 3.1879124    | 7.625397823  | 6.100474217  | 6.86293602   |
| 587 | 2.342270555  | 4.7923037 | 7.242336783  | -0.352108471 | -0.352108471 | -0.352108471 |
| 594 | 4.579618372  | 5.4673241 | 3.691912626  | 7.060560369  | 4.816592136  | 5.938576252  |
| 595 | 7.662449217  | 6.8549116 | 8.469986802  | 8.461492316  | 9.693261594  | 9.077376955  |
| 598 | -0.352108471 | -0.352108 | -0.352108471 | 7.353725402  | 7.474040996  | 7.233409808  |
| 602 | -0.352108471 | -0.352108 | -0.352108471 | 4.455603148  | 6.713749539  | 5.584676343  |
| 604 | -0.352108471 | -0.352108 | -0.352108471 | 5.640498569  | 5.760537073  | 5.880575577  |
| 607 | 5.749402114  | 4.4694506 | 7.029353582  | -0.352108471 | -0.352108471 | -0.352108471 |
| 613 | -0.352108471 | -0.352108 | -0.352108471 | 2.368970958  | 2.686833264  | 2.051108653  |
| 617 | -0.352108471 | -0.352108 | -0.352108471 | 8.019856501  | 6.251034844  | 4.482213187  |
| 618 | 6.498998083  | 3.4566386 | 9.541357538  | 7.093676226  | 6.742862436  | 6.392048646  |
| 622 | 4.612603102  | 2.7802203 | 6.444985911  | 1.290035436  | 1.14221151   | 1.437859363  |
| 624 | -0.352108471 | -0.352108 | -0.352108471 | 8.605277903  | 6.577483275  | 4.549688648  |
| 627 | -0.352108471 | -0.352108 | -0.352108471 | 5.462380241  | 5.526454112  | 5.494417177  |
| 633 | 1.66985715   | -0.352108 | 3.69182277   | 7.381849155  | 7.396922722  | 7.366775589  |
| 642 | -0.352108471 | -0.352108 | -0.352108471 | 6.5321479    | 6.523214599  | 6.896541123  |
| 642 | -0.352108471 | -0.352108 | -0.352108471 | 6.296043865  | 5.91480293   | 6.677284801  |
| 644 | -0.352108471 | -0.352108 | -0.352108471 | 3.515778726  | 5.095423988  | 6.67506925   |
| 649 | -0.352108471 | -0.352108 | -0.352108471 | 8.252551998  | 3.887535935  | 6.070043966  |
| 653 | 6.183964016  | 7.5240207 | 4.843907301  | 0.228373553  | 0.808855576  | -0.352108471 |
| 654 | -0.352108471 | -0.352108 | -0.352108471 | 2.525716947  | 2.455378162  | 2.596055731  |
| 655 | 8.278152679  | 7.1605245 | 6.042896243  | 6.498474599  | 4.243989136  | 8.752960063  |
| 656 | 4.780251272  | 3.5151412 | 2.250031199  | 3.97076157   | 5.299716099  | 2.64180704   |
| 657 | 3.127737875  | 3.136327  | 3.119148782  | 5.663737322  | 5.665786693  | 5.661687951  |
| 659 | 3.624456288  | 3.136327  | 4.112585606  | 7.965186454  | 7.153114613  | 7.559150534  |
| 660 | 8.225473264  | 6.502263  | 4.779052792  | -0.352108471 | -0.352108471 | -0.352108471 |
| 663 | 6.032383908  | 7.3440039 | 8.655623821  | -0.352108471 | -0.352108471 | -0.352108471 |
| 664 | 5.631148917  | 4.8753327 | 5.253240792  | 7.430793515  | 4.148731937  | 5.789762726  |
| 666 | 6.012092159  | 7.9936758 | 9.97525947   | 7.502040615  | 6.478723709  | 8.525357521  |
| 667 | 5.586906204  | 5.7155573 | 5.458255064  | 7.75831886   | 7.675016565  | 7.841621156  |
| 668 | 7.717914505  | 6.8007694 | 7.259341956  | 2.024343053  | 2.051108653  | 1.997577452  |
| 672 | 7.404619826  | 5.7252834 | 9.083956246  | 5.48586401   | 5.383503645  | 5.588224375  |
| 675 | 7.625489951  | 5.3215488 | 8.985632148  | -0.352108471 | -0.352108471 | -0.352108471 |
| 677 | -0.352108471 | -0.352108 | -0.352108471 | 6.688193135  | 7.43837927   | 7.063286202  |
| 678 | 4.983275232  | 6.0203811 | 7.057486951  | 9.540558217  | 5.875707677  | 7.708132947  |
| 682 | 7.042523083  | 7.530598  | 6.554448161  | 6.693541633  | 13.12881009  | 9.91117586   |

|     |              |           |              |              |              |              |
|-----|--------------|-----------|--------------|--------------|--------------|--------------|
| 686 | -0.352108471 | -0.352108 | -0.352108471 | 1.610456079  | 2.813430359  | 2.211943219  |
| 687 | 6.396071861  | 5.9002924 | 5.4045129    | -0.352108471 | -0.352108471 | -0.352108471 |
| 688 | -0.352108471 | -0.352108 | -0.352108471 | 5.529311366  | 5.0088957    | 6.049727031  |
| 689 | 6.826791329  | 7.3241242 | 7.821457072  | 6.15922378   | 8.283427196  | 10.40763061  |
| 694 | 8.996945065  | 4.9380774 | 6.967511245  | 6.561593381  | 4.929195545  | 5.745394463  |
| 696 | 6.020381091  | 7.2741943 | 4.766567849  | -0.352108471 | -0.352108471 | -0.352108471 |
| 705 | -0.352108471 | -0.352108 | -0.352108471 | 8.083868211  | 6.693937107  | 5.304006003  |
| 706 | 5.951381674  | 2.5390469 | 4.245214285  | 4.210192471  | 7.972547994  | 11.73490352  |
| 708 | -0.352108471 | -0.352108 | -0.352108471 | 6.390243821  | 5.923493182  | 5.456742543  |
| 710 | 9.175028639  | 5.5638266 | 7.369427614  | -0.352108471 | -0.352108471 | -0.352108471 |
| 713 | 2.250607883  | 7.8255702 | 5.038089054  | -0.352108471 | -0.352108471 | -0.352108471 |
| 714 | 5.170522111  | 5.9470136 | 5.55876787   | -0.352108471 | -0.352108471 | -0.352108471 |
| 715 | -0.352108471 | -0.352108 | -0.352108471 | 5.64354012   | 5.499659275  | 5.787420965  |
| 717 | -0.352108471 | -0.352108 | -0.352108471 | 5.620762093  | 6.535396663  | 4.706127522  |
| 720 | -0.352108471 | -0.352108 | -0.352108471 | 1.897009512  | 2.147539136  | 1.646479888  |
| 726 | 5.656118409  | 5.2174911 | 4.778863869  | 7.64126651   | 5.923493182  | 4.205719854  |
| 727 | 6.640019393  | 6.6538708 | 6.626167961  | 0.228373553  | 0.808855576  | -0.352108471 |
| 738 | 3.25230152   | 7.100875  | 5.17658824   | 7.1633918    | 6.503023606  | 6.833207703  |
| 740 | 8.903116836  | 7.6279844 | 6.352851992  | 0.808855576  | 0.808855576  | 0.808855576  |
| 741 | 4.092568267  | 8.9821992 | 6.537383725  | -0.352108471 | -0.352108471 | -0.352108471 |
| 746 | 8.632066898  | 6.3034612 | 3.974855591  | 9.828988495  | 4.749167616  | 7.289078056  |
| 747 | 2.588601447  | 5.5293114 | -0.352108471 | 6.104429468  | 6.135204448  | 6.073654487  |
| 754 | 6.888413829  | 6.3541128 | 7.422714809  | 6.784471269  | 10.10435564  | 8.444413455  |
| 755 | 2.201036472  | -0.352108 | 4.754181416  | 5.466802197  | 5.325716078  | 5.184629959  |
| 757 | 3.221680638  | 3.3976438 | 3.573606975  | 4.324499914  | 6.636273252  | 8.948046589  |
| 758 | 7.344991552  | 5.8529375 | 4.360883371  | -0.352108471 | -0.352108471 | -0.352108471 |
| 762 | 2.451290702  | 4.4805042 | 0.422077159  | -0.352108471 | -0.352108471 | -0.352108471 |
| 765 | -0.352108471 | -0.352108 | -0.352108471 | 5.003900023  | 4.711179846  | 4.857539934  |
| 770 | 6.239860938  | 5.1144544 | 7.365267522  | 6.780090392  | 4.547384252  | 5.663737322  |
| 771 | 5.834617878  | 7.3441675 | 6.58939268   | 0.624614178  | 0.440372779  | 0.808855576  |
| 773 | 5.817791201  | 5.7155573 | 5.920025058  | -0.352108471 | -0.352108471 | -0.352108471 |
| 774 | -0.352108471 | -0.352108 | -0.352108471 | 2.501526031  | -0.352108471 | 5.355160532  |
| 777 | -0.352108471 | -0.352108 | -0.352108471 | 0.919601171  | 2.191310813  | -0.352108471 |
| 780 | 6.965092281  | 6.5021238 | 6.03915525   | 5.20089139   | 2.915740138  | 7.486042641  |
| 781 | -0.352108471 | -0.352108 | -0.352108471 | 1.713271551  | 6.882006614  | 4.297639083  |
| 783 | 5.242500616  | 6.0023087 | 4.482692559  | 0.289051906  | -0.352108471 | 0.930212283  |
| 790 | 6.463674915  | 5.8954858 | 7.031864022  | 6.861176432  | 6.912044458  | 6.886610445  |
| 800 | 9.23591817   | 9.2038491 | 9.267987234  | 10.94163088  | 11.01856029  | 10.86470147  |
| 801 | 8.14581367   | 8.8305437 | 7.461083662  | 10.78008366  | 8.643381996  | 6.506680336  |
| 805 | 8.320469331  | 9.4478149 | 10.57516051  | 9.906169645  | 8.441499074  | 9.17383436   |
| 808 | 8.912294534  | 7.1464808 | 5.380666979  | 7.885273527  | 7.191457353  | 7.53836544   |
| 811 | 9.276414114  | 10.840521 | 10.05846765  | 9.237906068  | 10.93092673  | 10.0844164   |
| 813 | 8.540899881  | 8.5656147 | 8.516185087  | 8.59245798   | 8.587057431  | 8.59785853   |
| 814 | 1.392109249  | 3.136327  | -0.352108471 | 6.32531018   | 4.934949219  | 7.715671142  |
| 816 | 5.368848099  | 7.635678  | 6.502263028  | -0.352108471 | -0.352108471 | -0.352108471 |
| 817 | -0.352108471 | -0.352108 | -0.352108471 | 5.85533265   | 8.625015656  | 7.240174153  |
| 819 | 5.54524521   | 5.3954371 | 5.695053316  | 0.044132154  | 0.440372779  | -0.352108471 |

|     |              |           |              |              |              |              |
|-----|--------------|-----------|--------------|--------------|--------------|--------------|
| 821 | 7.788129335  | 9.3259143 | 8.557021809  | 10.88904381  | 8.040790482  | 5.192537156  |
| 823 | 6.408335249  | 8.9096683 | 11.41100139  | 6.967817429  | 7.32478698   | 7.146302205  |
| 824 | 5.377684625  | 6.8302983 | 8.282912046  | 6.380198231  | 6.666990727  | 6.523594479  |
| 826 | 7.741124349  | 8.0405176 | 8.339910877  | 8.932767957  | 9.934662693  | 7.930873222  |
| 827 | -0.352108471 | -0.352108 | -0.352108471 | 3.245625856  | 4.677392879  | 1.813858833  |
| 829 | 5.795957397  | 9.1049407 | 7.450449055  | 8.202893741  | 8.277079148  | 8.351264555  |
| 830 | 7.494042651  | 5.8220038 | 6.658023207  | 5.597471128  | 6.662328952  | 6.12990004   |
| 832 | 5.485142306  | 6.9989543 | 6.242048279  | 8.695477893  | 7.687774172  | 9.703181614  |
| 833 | 6.502263028  | 7.9031079 | 5.101418134  | 7.877278125  | 5.767139528  | 6.822208827  |
| 835 | 6.05159641   | 8.1292719 | 7.090434151  | 4.811151293  | 3.860731867  | 5.76157072   |
| 836 | -0.352108471 | -0.352108 | -0.352108471 | 6.175041264  | 5.309738611  | 7.040343918  |
| 838 | -0.352108471 | -0.352108 | -0.352108471 | 5.923840725  | 6.120261125  | 6.022050925  |
| 839 | 5.591305588  | 5.6118052 | 5.570805936  | 5.391782839  | 3.52198956   | 4.456886199  |
| 841 | 6.132049638  | 4.4829661 | 7.781133204  | 6.984956811  | 8.005934009  | 5.963979613  |
| 842 | 8.961661459  | 4.5098979 | 6.735779686  | 4.37140445   | 2.798838152  | 3.585121301  |
| 843 | -0.352108471 | -0.352108 | -0.352108471 | 7.1225757    | 3.236819248  | 5.179697474  |
| 847 | 7.084558672  | 6.7951849 | 6.939871798  | 5.734113463  | 6.32531018   | 6.916506897  |
| 857 | 10.26908572  | 8.5838269 | 9.426456321  | 10.17702126  | 9.516914426  | 10.83712809  |
| 858 | 7.160812723  | 6.7393234 | 7.582302     | 6.94300136   | 5.803339018  | 8.082663702  |
| 862 | 5.636758727  | 6.8161979 | 7.99563715   | 0.624614178  | 0.440372779  | 0.808855576  |
| 871 | 8.867116017  | 9.107832  | 8.626400046  | 6.99577964   | 12.85576918  | 9.925774412  |
| 873 | -0.352108471 | -0.352108 | -0.352108471 | 6.270080905  | 7.269863612  | 8.269646319  |
| 874 | 5.354685649  | 4.4314502 | 6.277921075  | -0.352108471 | -0.352108471 | -0.352108471 |
| 889 | 5.380093023  | 2.5995424 | 3.989817733  | -0.352108471 | -0.352108471 | -0.352108471 |
| 890 | 5.79452377   | 5.062264  | 5.428393874  | 7.108206964  | 6.068301163  | 6.588254064  |
| 891 | -0.352108471 | -0.352108 | -0.352108471 | 5.226381766  | 5.546527222  | 5.866672678  |
| 894 | 8.561441704  | 4.4016062 | 6.481523945  | -0.352108471 | -0.352108471 | -0.352108471 |
| 896 | -0.352108471 | -0.352108 | -0.352108471 | 6.754403141  | 7.196843491  | 6.975623316  |
| 899 | 6.860485731  | 9.2062245 | 4.514746954  | 9.131624171  | 6.183964016  | 3.236303861  |
| 900 | 8.684940475  | 7.621847  | 8.153393761  | -0.352108471 | -0.352108471 | -0.352108471 |
| 902 | 8.06771298   | 6.2125362 | 4.357359437  | -0.352108471 | -0.352108471 | -0.352108471 |
| 911 | -0.352108471 | -0.352108 | -0.352108471 | 6.296043865  | 6.31523113   | 6.276856601  |
| 917 | 5.781003172  | 4.9317647 | 5.356383913  | 4.018737342  | 1.878647654  | 6.158827029  |
| 920 | 5.493783215  | 5.5293114 | 5.458255064  | -0.352108471 | -0.352108471 | -0.352108471 |
| 928 | 6.056053999  | 6.0736545 | 6.038453511  | 5.596916991  | 5.605609608  | 5.588224375  |
| 933 | 5.089412202  | 6.6009453 | 3.577879136  | -0.352108471 | -0.352108471 | -0.352108471 |
| 944 | -0.352108471 | -0.352108 | -0.352108471 | 4.80208491   | 7.040503188  | 2.563666632  |
| 947 | 8.289573677  | 8.5715583 | 8.430566011  | 7.024362382  | 7.971523244  | 6.07720152   |
| 949 | -0.352108471 | -0.352108 | -0.352108471 | 2.458452582  | 2.902991023  | 3.347529463  |
| 950 | 5.22751712   | 8.4348954 | 6.83120624   | 7.134555948  | 8.515770926  | 5.75334097   |
| 953 | 9.226601419  | 9.7165867 | 10.20657198  | 9.776795363  | 6.367865082  | 8.072330222  |
| 955 | -0.352108471 | -0.352108 | -0.352108471 | 7.135976498  | 6.435912105  | 6.785944301  |
| 957 | 5.869068613  | 7.3456863 | 6.607377459  | -0.352108471 | -0.352108471 | -0.352108471 |
| 960 | 9.913575227  | 9.9058398 | 9.898104288  | 9.372706092  | 11.73122264  | 10.55196436  |
| 961 | 6.398728792  | 4.8209485 | 3.24316818   | 4.002423202  | 6.566987041  | 1.437859363  |
| 966 | 7.875021286  | 7.102821  | 8.647221598  | 10.20223816  | 9.487630864  | 8.773023567  |
| 967 | 9.526140155  | 8.5780141 | 7.62988806   | 10.29241286  | 7.835247198  | 9.063830029  |



|      |              |           |              |              |              |              |
|------|--------------|-----------|--------------|--------------|--------------|--------------|
| 968  | 6.21555058   | 6.1523775 | 6.183964016  | 9.310177241  | 5.121036563  | 7.215606902  |
| 972  | -0.352108471 | -0.352108 | -0.352108471 | 0.219081723  | 3.228447668  | 6.237813614  |
| 975  | 7.811707445  | 11.513219 | 9.662463025  | 9.125440131  | 7.688082324  | 10.56279794  |
| 976  | 3.424800141  | 6.6094727 | 5.017136436  | 6.204656258  | 6.195245599  | 6.214066917  |
| 977  | 8.639139696  | 8.4045671 | 8.169994563  | 8.09424008   | 9.895157546  | 8.994698813  |
| 978  | 4.471811676  | 5.0522677 | 5.632723695  | 5.751153254  | 7.178522138  | 8.605891021  |
| 984  | -0.352108471 | -0.352108 | -0.352108471 | 2.146123334  | 3.081875283  | 1.210371385  |
| 987  | 7.916491175  | 5.8001998 | 3.6839084    | -0.352108471 | -0.352108471 | -0.352108471 |
| 989  | 7.305341479  | 6.2912631 | 8.319419813  | 6.558419977  | 7.576043883  | 5.54079607   |
| 990  | 7.05303533   | 6.5345309 | 7.571539789  | 5.055622197  | 5.780944036  | 6.506265874  |
| 991  | 5.450287933  | 4.9116502 | 4.373012483  | 7.500670614  | 8.212686149  | 6.788655079  |
| 995  | -0.352108471 | -0.352108 | -0.352108471 | 6.359270363  | 6.424327813  | 6.294212913  |
| 996  | 5.931810751  | 5.825168  | 6.038453511  | 6.771871898  | 7.386082653  | 6.157661143  |
| 997  | 3.753242592  | 6.1383138 | 8.523384972  | 8.483674234  | 5.763296942  | 7.123485588  |
| 998  | 9.031356711  | 8.4650146 | 8.748185667  | 7.043032659  | 7.349917404  | 7.656802148  |
| 1000 | 6.689878453  | 6.9004869 | 6.479269959  | 6.033059519  | 6.298681693  | 6.165870606  |
| 1005 | 5.217491139  | 7.9701489 | 2.464833418  | -0.352108471 | -0.352108471 | -0.352108471 |
| 1010 | 5.001646961  | 6.502263  | 8.002879095  | -0.352108471 | -0.352108471 | -0.352108471 |
| 1012 | -0.352108471 | -0.352108 | -0.352108471 | 6.014622175  | 6.204656258  | 6.394690341  |
| 1019 | 5.054381279  | 4.3858365 | 4.720108865  | 7.623987129  | 7.226858928  | 7.425423028  |
| 1020 | -0.352108471 | -0.352108 | -0.352108471 | 5.596916991  | 5.605609608  | 5.588224375  |
| 1021 | 5.217491139  | 6.0114989 | 4.423483399  | 0.044132154  | -0.352108471 | 0.440372779  |
| 1022 | 6.913488898  | 6.7984663 | 7.028511527  | -0.352108471 | -0.352108471 | -0.352108471 |
| 1026 | 7.541301669  | 4.4931056 | 10.58949778  | 7.374429005  | 11.67704094  | 9.525734971  |
| 1029 | -0.352108471 | -0.352108 | -0.352108471 | 5.753543754  | 6.130929297  | 5.942236525  |
| 1031 | 5.15172345   | 5.4283939 | 5.705064299  | -0.352108471 | -0.352108471 | -0.352108471 |
| 1033 | 3.362379091  | 6.2222282 | 4.792303669  | -0.352108471 | -0.352108471 | -0.352108471 |
| 1041 | 6.607377459  | 6.2011696 | 7.013585304  | -0.352108471 | -0.352108471 | -0.352108471 |
| 1044 | -0.352108471 | -0.352108 | -0.352108471 | 5.169157826  | 5.966733932  | 4.371581719  |
| 1048 | 6.20615762   | 7.3413239 | 6.77374078   | -0.352108471 | -0.352108471 | -0.352108471 |
| 1051 | 5.718459767  | 5.5596947 | 5.877224786  | 9.151931627  | 6.83194586   | 7.991938744  |
| 1052 | -0.352108471 | -0.352108 | -0.352108471 | 6.810957895  | 4.236470138  | 9.385445652  |
| 1054 | -0.352108471 | -0.352108 | -0.352108471 | 3.787078433  | 5.233567424  | 6.680056414  |
| 1059 | 8.651658241  | 5.3028582 | 6.977258204  | 5.428738754  | 6.531929302  | 5.980334028  |
| 1062 | 7.016776417  | 5.5311094 | 8.502443459  | 3.987437271  | 5.285554459  | 4.583671646  |
| 1063 | 6.242048279  | 6.2558778 | 6.228218771  | 5.789762726  | 5.804293869  | 5.775231583  |
| 1069 | 1.653087098  | 7.4475285 | 4.550307802  | 6.266367194  | 10.04199253  | 2.490741857  |
| 1072 | 9.651358833  | 9.6691777 | 9.633539928  | 11.29802876  | 11.29802876  | 11.29802876  |
| 1073 | 8.52961696   | 7.3777551 | 6.225893307  | 5.790806265  | 9.111310342  | 7.451058303  |
| 1075 | 5.42029107   | 5.4582551 | 5.496219058  | 10.25963782  | 8.063052958  | 5.866468096  |
| 1082 | 5.56838165   | 8.2355769 | 6.901979267  | -0.352108471 | -0.352108471 | -0.352108471 |
| 1087 | 6.167582836  | 6.312044  | 6.023121627  | -0.352108471 | -0.352108471 | -0.352108471 |
| 1089 | 7.700906227  | 6.4636749 | 5.226443602  | -0.352108471 | -0.352108471 | -0.352108471 |
| 1101 | 5.813764122  | 6.3178342 | 6.821904343  | -0.352108471 | -0.352108471 | -0.352108471 |
| 1104 | -0.352108471 | -0.352108 | -0.352108471 | 3.883023856  | 4.178899946  | 4.474776035  |
| 1107 | -0.352108471 | -0.352108 | -0.352108471 | 6.46748826   | 7.307185689  | 5.627790831  |
| 1108 | -0.352108471 | -0.352108 | -0.352108471 | 7.668177708  | 9.401546237  | 5.934809179  |



|      |              |           |              |              |              |              |
|------|--------------|-----------|--------------|--------------|--------------|--------------|
| 1111 | 6.289299368  | 4.5523394 | 5.420819363  | 0.228373553  | -0.352108471 | 0.808855576  |
| 1116 | 3.098924625  | 4.8786655 | 6.658406331  | -0.352108471 | -0.352108471 | -0.352108471 |
| 1118 | -0.352108471 | -0.352108 | -0.352108471 | 7.161038899  | 0.929336728  | 4.045187814  |
| 1121 | 5.49112888   | 5.0916696 | 5.291399258  | 0.289051906  | -0.352108471 | 0.930212283  |
| 1122 | 4.513304033  | 4.1371548 | 4.889453296  | 5.866795484  | 7.197485464  | 4.536105503  |
| 1123 | -0.352108471 | -0.352108 | -0.352108471 | 7.885718121  | 5.794509996  | 6.840114058  |
| 1124 | -0.352108471 | -0.352108 | -0.352108471 | 7.230161606  | 3.236973241  | 5.233567424  |
| 1130 | 8.855216083  | 6.573969  | 4.292721916  | -0.352108471 | -0.352108471 | -0.352108471 |
| 1137 | 2.930522656  | 5.4937832 | 8.057043774  | -0.352108471 | -0.352108471 | -0.352108471 |
| 1138 | 7.480527585  | 6.3637627 | 5.246997726  | 3.552694803  | 5.054280952  | 2.051108653  |
| 1140 | 8.00369157   | 7.7585064 | 8.248876705  | 6.50040249   | 7.430061825  | 8.35972116   |
| 1147 | -0.352108471 | -0.352108 | -0.352108471 | 5.233567424  | 5.254689875  | 5.212444972  |
| 1152 | -0.352108471 | -0.352108 | -0.352108471 | 5.855547981  | 6.814574715  | 4.896521246  |
| 1163 | -0.352108471 | -0.352108 | -0.352108471 | 6.933758644  | 6.859217306  | 6.784675967  |
| 1164 | 6.858070517  | 6.7871341 | 6.716197628  | 8.429817558  | 6.751466056  | 5.073114555  |
| 1173 | 9.756338542  | 9.1972611 | 9.47679983   | 10.96797735  | 9.263192723  | 7.558408099  |
| 1174 | -0.352108471 | -0.352108 | -0.352108471 | 5.412561087  | 5.421579811  | 5.403542364  |
| 1175 | 7.548901375  | 6.2146173 | 8.883185469  | 8.061929517  | 7.248456608  | 8.875402425  |
| 1176 | 7.639635545  | 7.2490859 | 8.030185209  | 6.560527001  | 8.709328933  | 4.411725069  |
| 1184 | 7.249504893  | 7.352529  | 7.146480757  | 6.890254017  | 6.907463027  | 6.873045007  |
| 1186 | 7.939978488  | 7.9748192 | 7.905137775  | 7.580379813  | 7.507270991  | 7.653488636  |
| 1192 | 7.395172444  | 7.4859561 | 7.57673985   | 9.156626621  | 9.214066695  | 9.099186547  |
| 1195 | 8.074125067  | 6.8018138 | 5.529502481  | 0.440372779  | 0.440372779  | 0.440372779  |
| 1200 | -0.352108471 | -0.352108 | -0.352108471 | 7.069324776  | 7.082394844  | 7.056254708  |
| 1209 | 6.294598926  | 8.6046455 | 7.449622211  | 7.758293406  | 5.448807611  | 6.603550508  |
| 1211 | 7.986731438  | 11.417429 | 4.5560342    | 7.9391614    | 7.999549466  | 7.878773335  |
| 1212 | 8.291850712  | 6.8681731 | 5.444495503  | 7.195776097  | 8.403075065  | 9.610374033  |
| 1213 | 9.243597871  | 7.4402611 | 5.636924288  | 8.584358598  | 8.351212473  | 8.118066348  |
| 1235 | 8.704774016  | 10.08633  | 7.323217744  | 6.021653764  | 7.0424346    | 8.063215436  |
| 1238 | 4.60818135   | 4.8304259 | 4.385936778  | 0.791292145  | 0.440372779  | 1.14221151   |
| 1241 | 4.528924884  | 4.671913  | 4.385936778  | 5.966446363  | 5.775231583  | 6.157661143  |
| 1244 | 5.821382858  | 5.4289387 | 5.625160771  | -0.352108471 | -0.352108471 | -0.352108471 |
| 1258 | -0.352108471 | -0.352108 | -0.352108471 | 1.347778277  | 3.157458146  | 2.252618212  |
| 1260 | 8.697922221  | 4.7434709 | 6.720696571  | -0.352108471 | -0.352108471 | -0.352108471 |
| 1263 | -0.352108471 | -0.352108 | -0.352108471 | 7.186511196  | 6.96115987   | 7.411862521  |
| 1264 | 6.448936284  | 9.1633811 | 7.806158706  | 7.191902102  | 5.526141656  | 8.857662547  |
| 1265 | 7.625917328  | 8.6327219 | 8.129319611  | 11.47857173  | 7.917494695  | 9.698033212  |
| 1266 | -0.352108471 | -0.352108 | -0.352108471 | 6.631846251  | 10.18338295  | 3.080309554  |
| 1267 | 2.739370013  | 7.8305787 | 5.284974356  | 5.40346407   | 7.098605618  | 6.251034844  |
| 1277 | 10.84527839  | 11.693655 | 12.54203144  | 11.44566657  | 13.04193267  | 12.24379962  |
| 1278 | 9.860304297  | 10.009607 | 9.934955428  | 10.0105711   | 10.89311925  | 11.7756674   |
| 1281 | 6.948029234  | 8.7744596 | 10.60088992  | 9.457277455  | 9.275289669  | 9.093301882  |
| 1282 | 9.476044814  | 7.6827213 | 11.26936835  | 9.553777807  | 11.85439279  | 7.253162824  |
| 1284 | 10.47703907  | 10.553027 | 10.62901523  | 10.56204105  | 9.807752056  | 10.18489655  |
| 1287 | 8.120279852  | 5.2174911 | 2.314702426  | -0.352108471 | -0.352108471 | -0.352108471 |
| 1288 | -0.352108471 | -0.352108 | -0.352108471 | 3.921118155  | 2.211943219  | 0.502768283  |
| 1289 | 7.980118636  | 9.6136567 | 6.346580545  | 7.896622182  | 9.253957459  | 8.575289821  |

|      |              |           |              |              |              |              |
|------|--------------|-----------|--------------|--------------|--------------|--------------|
| 1290 | 6.590508304  | 6.6215439 | 6.559472732  | 8.480322745  | 8.489801751  | 8.470843739  |
| 1291 | 10.41668396  | 10.223009 | 10.02933476  | 8.034656863  | 10.34644693  | 9.190551899  |
| 1292 | 9.676504791  | 9.6477625 | 9.705247115  | 8.028981969  | 8.039791301  | 8.018172636  |
| 1293 | 9.286219017  | 7.2523995 | 8.269309258  | 9.204135884  | 8.986005302  | 9.422266466  |
| 1294 | 5.307588256  | 6.8045197 | 6.056053999  | 3.413036741  | 5.624064457  | 7.835092173  |
| 1297 | 4.792303669  | 5.649381  | 3.935226313  | -0.352108471 | -0.352108471 | -0.352108471 |
| 1303 | 5.313762023  | 7.3511713 | 6.332466669  | 5.578817747  | 6.829307464  | 8.07979718   |
| 1307 | -0.352108471 | -0.352108 | -0.352108471 | 4.673928722  | 5.637296679  | 6.600664635  |
| 1310 | 8.134713191  | 4.8015905 | 6.468151867  | 3.258303997  | 5.241633112  | 7.224962226  |
| 1312 | 7.197039856  | 4.4033597 | 5.800199788  | 10.7824872   | 4.023360718  | 7.40292396   |
| 1314 | 6.759189408  | 4.5503078 | 2.341426195  | 5.563079715  | 7.68524044   | 6.624160077  |
| 1315 | 6.303461245  | 4.4146004 | 8.192322072  | 8.185377     | 5.205994566  | 6.695685783  |
| 1316 | -0.352108471 | -0.352108 | -0.352108471 | 4.021399483  | 4.201099247  | 4.380799012  |
| 1317 | 9.340136108  | 9.2849746 | 9.229813057  | 8.050338643  | 8.072630865  | 8.028046422  |
| 1327 | 7.398193617  | 6.1145004 | 8.68188685   | 7.523355179  | 8.22062535   | 8.917895522  |
| 1329 | 6.573968999  | 8.517611  | 4.63032698   | 1.35857476   | 1.884572605  | 1.621573683  |
| 1337 | 4.434314669  | 7.4034708 | 1.465158581  | 7.81588956   | 8.907273265  | 6.724505854  |
| 1340 | 5.384513167  | 6.2084328 | 7.032352386  | 6.823179934  | 9.443194752  | 8.133187343  |
| 1345 | -0.352108471 | -0.352108 | -0.352108471 | 6.936608066  | 6.432268644  | 7.440947487  |
| 1346 | -0.352108471 | -0.352108 | -0.352108471 | 5.596312349  | 7.094238567  | 6.345275458  |
| 1347 | -0.352108471 | -0.352108 | -0.352108471 | 5.859617369  | 5.873345987  | 5.845888751  |
| 1349 | -0.352108471 | -0.352108 | -0.352108471 | 2.252618212  | 2.252618212  | 2.252618212  |
| 1350 | 9.145134675  | 5.9571377 | 7.551136183  | 6.981201065  | 6.892803031  | 6.937002048  |
| 1351 | 2.065292044  | 1.0538496 | 3.076734511  | 8.208715124  | 7.001625016  | 7.60517007   |
| 1355 | 6.073062111  | 5.9744272 | 6.171697018  | -0.352108471 | -0.352108471 | -0.352108471 |
| 1357 | 4.417353062  | 5.7155573 | 3.119148782  | -0.352108471 | -0.352108471 | -0.352108471 |
| 1368 | 8.150584921  | 6.0473337 | 7.098959317  | 7.004567807  | 7.124816589  | 6.884319024  |
| 1371 | 6.573968999  | 6.5884653 | 6.559472732  | -0.352108471 | -0.352108471 | -0.352108471 |
| 1374 | 5.695541451  | 11.378911 | 8.537226068  | 7.249046889  | 6.620433142  | 6.934740015  |
| 1376 | 3.969479587  | 8.0521799 | 6.01082974   | 8.75162142   | 7.119119679  | 5.486617937  |
| 1378 | 5.94941124   | 8.1603775 | 3.738444995  | 2.552253116  | 1.549724107  | 3.554782125  |
| 1382 | 2.93733314   | 4.7311114 | 6.524889604  | 7.027375773  | 7.169571732  | 6.885179814  |
| 1384 | 7.202560832  | 5.9453772 | 6.573968999  | -0.352108471 | -0.352108471 | -0.352108471 |
| 1385 | -0.352108471 | -0.352108 | -0.352108471 | 5.198791292  | 6.77374078   | 8.348690268  |
| 1386 | 5.852937462  | 5.1060484 | 6.599826493  | -0.352108471 | -0.352108471 | -0.352108471 |
| 1387 | -0.352108471 | -0.352108 | -0.352108471 | 7.052848865  | 5.88700099   | 4.721153114  |
| 1388 | 7.871775243  | 5.0894122 | 2.307049161  | 7.057424469  | 4.367102386  | 5.712263427  |
| 1397 | -0.352108471 | -0.352108 | -0.352108471 | 3.245625856  | 4.201533236  | 2.289718476  |
| 1398 | 4.690462568  | 6.2728949 | 7.855327149  | 7.257788984  | 7.57386965   | 6.941708318  |
| 1399 | -0.352108471 | -0.352108 | -0.352108471 | 4.665348107  | 5.605048166  | 6.544748225  |
| 1406 | 9.107342156  | 10.544079 | 7.670605405  | 11.63434175  | 7.658347728  | 3.68235371   |
| 1407 | -0.352108471 | -0.352108 | -0.352108471 | 6.434644758  | 7.770498513  | 5.098791003  |
| 1410 | 6.720370627  | 6.7508628 | 6.689878453  | -0.352108471 | -0.352108471 | -0.352108471 |
| 1415 | -0.352108471 | -0.352108 | -0.352108471 | 6.735779686  | 5.92910625   | 7.542453123  |
| 1416 | 7.582478247  | 7.0736263 | 6.564774331  | 6.298963122  | 3.002629051  | 9.595297192  |
| 1420 | -0.352108471 | -0.352108 | -0.352108471 | 0.95025487   | 2.252618212  | -0.352108471 |
| 1431 | 2.221508879  | 2.4458255 | 2.670142181  | 0.495450612  | 3.245625856  | 5.995801099  |

|      |              |           |              |              |              |              |
|------|--------------|-----------|--------------|--------------|--------------|--------------|
| 1434 | 7.33826098   | 7.0253499 | 6.712438841  | -0.352108471 | -0.352108471 | -0.352108471 |
| 1435 | -0.352108471 | -0.352108 | -0.352108471 | 7.036396027  | 8.565938324  | 5.506853729  |
| 1436 | 7.494467498  | 6.5373837 | 5.580299951  | 0.044132154  | -0.352108471 | 0.440372779  |
| 1437 | 6.897089188  | 6.1071583 | 6.502123765  | -0.352108471 | -0.352108471 | -0.352108471 |
| 1439 | -0.352108471 | -0.352108 | -0.352108471 | 6.022050925  | 6.038453511  | 6.005648339  |
| 1445 | 5.440482721  | 6.3691566 | 7.29783046   | 2.124237496  | 2.147539136  | 2.100935855  |
| 1452 | 4.533588456  | 7.9232175 | 6.228402992  | -0.352108471 | -0.352108471 | -0.352108471 |
| 1453 | 5.993679345  | 4.8631084 | 5.428393874  | 6.625595045  | 4.604759169  | 8.646430922  |
| 1455 | 7.06641971   | 7.0919708 | 7.040868605  | 7.186150958  | 7.149537332  | 7.222764584  |
| 1457 | 6.537383725  | 4.9935512 | 8.081216298  | -0.352108471 | -0.352108471 | -0.352108471 |
| 1459 | 5.354685649  | 4.7467312 | 5.9626401    | -0.352108471 | -0.352108471 | -0.352108471 |
| 1460 | 5.625160771  | 5.6532998 | 5.597021732  | -0.352108471 | -0.352108471 | -0.352108471 |
| 1462 | 1.383520155  | -0.352108 | 3.119148782  | 5.017136436  | 8.15969518   | 1.874577691  |
| 1463 | -0.352108471 | -0.352108 | -0.352108471 | 6.313887715  | 6.89992346   | 7.485959206  |
| 1464 | -0.352108471 | -0.352108 | -0.352108471 | 7.852007698  | 7.640414475  | 8.063600921  |
| 1465 | 6.76919815   | 6.7357797 | 6.702361222  | 11.64597639  | 9.561320885  | 7.47666538   |
| 1466 | 6.700648212  | 6.4472898 | 6.573968999  | -0.352108471 | -0.352108471 | -0.352108471 |
| 1468 | -0.352108471 | -0.352108 | -0.352108471 | 5.511864271  | 4.66078572   | 6.362942822  |
| 1471 | 8.461910603  | 8.115481  | 8.288695803  | 7.203844697  | 10.13338184  | 8.668613267  |
| 1472 | -0.352108471 | -0.352108 | -0.352108471 | 3.949389832  | 1.14386139   | 2.546625611  |
| 1476 | 7.309433975  | 6.8173936 | 7.063413806  | 8.790704847  | 7.763124624  | 6.735544401  |
| 1477 | -0.352108471 | -0.352108 | -0.352108471 | 0.762376451  | -0.352108471 | 1.876861374  |
| 1488 | 8.764937771  | 6.2420483 | 3.719158787  | 6.752359668  | 6.22033882   | 5.688317973  |
| 1489 | -0.352108471 | -0.352108 | -0.352108471 | 6.016006936  | 8.784732755  | 3.247281116  |
| 1490 | 9.523670388  | 9.1421272 | 8.760583996  | 9.046626379  | 9.032143713  | 9.061109044  |
| 1491 | 5.579737679  | 3.5128398 | 4.546288763  | 1.556591723  | 1.305230684  | 1.807952763  |
| 1495 | 7.784633114  | 6.3324667 | 4.880300224  | 10.69379613  | 8.438433036  | 6.18306994   |
| 1497 | 5.935025625  | 3.7087213 | 4.821873485  | 1.345967809  | 1.14221151   | 1.549724107  |
| 1499 | 4.33467897   | 7.2657206 | 5.800199788  | 7.929880674  | 7.326356364  | 6.722832055  |
| 1503 | 7.98886211   | 4.8048747 | 6.396868383  | 5.233567424  | 4.890145737  | 5.57698911   |
| 1508 | 11.52352709  | 10.93352  | 10.34351316  | 10.4302022   | 10.26135335  | 10.09250451  |
| 1509 | 3.90477055   | 6.0218323 | 4.963301433  | 8.879459618  | 7.823295134  | 9.935624102  |
| 1513 | 3.218832558  | 6.4142581 | 9.609683714  | 8.383410412  | 9.718972752  | 7.047848073  |
| 1514 | -0.352108471 | -0.352108 | -0.352108471 | 6.35960917   | 6.396868383  | 6.434127595  |
| 1515 | 4.239379986  | 3.9195059 | 4.559254036  | 5.596916991  | 5.605609608  | 5.588224375  |
| 1520 | 2.465331273  | 4.3155755 | 6.165819791  | 1.07271249   | 3.680662938  | 6.288613386  |
| 1521 | -0.352108471 | -0.352108 | -0.352108471 | 2.065292044  | 4.482692559  | -0.352108471 |
| 1522 | 3.038997464  | 3.991285  | 3.515141236  | 3.857433443  | 7.861801295  | 5.859617369  |
| 1523 | 5.774370319  | 7.934825  | 3.613915593  | -0.352108471 | -0.352108471 | -0.352108471 |
| 1528 | -0.352108471 | -0.352108 | -0.352108471 | 3.742430852  | 3.36730463   | 2.992178408  |
| 1534 | 4.559245127  | 6.536272  | 8.51329891   | 4.696144107  | 6.434047684  | 5.565095895  |
| 1535 | 7.228191745  | 5.6886226 | 4.149053549  | 6.372987249  | 6.274700315  | 6.471274184  |
| 1537 | 6.735779686  | 6.9729333 | 6.498626103  | 8.040262919  | 6.070317529  | 10.01020831  |
| 1540 | -0.352108471 | -0.352108 | -0.352108471 | 3.147139248  | 5.181747782  | 7.216356316  |
| 1544 | 6.497227402  | 5.3203266 | 7.674128237  | 4.042376545  | 2.122618472  | 5.962134619  |
| 1556 | 5.810073753  | 7.5059727 | 6.658023207  | 1.689109503  | 1.203948072  | 2.174270934  |
| 1557 | -0.352108471 | -0.352108 | -0.352108471 | 4.456886199  | 3.256017866  | 5.657754533  |

|      |              |           |              |              |              |              |
|------|--------------|-----------|--------------|--------------|--------------|--------------|
| 1564 | -0.352108471 | -0.352108 | -0.352108471 | 1.943550341  | 2.605481072  | 2.274515706  |
| 1576 | 5.749402114  | 5.6913103 | 5.807493886  | 0.542875446  | 1.437859363  | -0.352108471 |
| 1577 | 6.573968999  | 6.5884653 | 6.559472732  | -0.352108471 | -0.352108471 | -0.352108471 |
| 1579 | 4.687513284  | 5.0027451 | 4.372281514  | 6.063922398  | 3.519327359  | 0.974732319  |
| 1582 | 1.383520155  | -0.352108 | 3.119148782  | 4.306267192  | 1.610816196  | 2.958541694  |
| 1595 | 7.04217785   | 5.9025329 | 6.472355382  | 7.645189468  | 3.545809849  | 5.595499658  |
| 1600 | 2.391332518  | 2.7115616 | 3.031790594  | -0.352108471 | -0.352108471 | -0.352108471 |
| 1601 | 7.726811751  | 8.2032738 | 8.679735909  | 6.414111315  | 9.416168623  | 7.915139969  |
| 1603 | 8.58611904   | 4.418407  | 6.502263028  | 5.578297053  | 9.46592144   | 7.522109247  |
| 1604 | 4.117428416  | 3.1277379 | 2.138047335  | 0.897715333  | -0.352108471 | 2.147539136  |
| 1605 | 6.735779686  | 6.3640494 | 7.107509939  | 7.031565324  | 9.285063726  | 4.778066922  |
| 1606 | 6.433318728  | 6.4453648 | 6.421272681  | 3.585121301  | 3.615460478  | 3.554782125  |
| 1607 | 6.427821161  | 6.576322  | 6.279320371  | 7.516066548  | 5.229907951  | 6.372987249  |
| 1611 | 4.779005767  | 5.463922  | 6.148838283  | 6.554379124  | 8.110056793  | 9.665734462  |
| 1612 | -0.352108471 | -0.352108 | -0.352108471 | 5.704335255  | 5.030218483  | 6.378452027  |
| 1613 | 7.972087265  | 7.4582829 | 6.944478504  | 5.793695433  | 8.563348842  | 7.178522138  |
| 1615 | 5.235100382  | 5.3546856 | 5.474270916  | 7.421205912  | 6.276856601  | 5.132507289  |
| 1616 | 6.761519244  | 7.1735032 | 6.967511245  | 8.246108508  | 5.439917437  | 2.633726367  |
| 1621 | 6.104558933  | 6.8029865 | 5.406131377  | 0.044132154  | 0.440372779  | -0.352108471 |
| 1627 | 6.257046343  | 4.8636031 | 7.650489632  | 9.811219085  | 8.166951604  | 8.989085344  |
| 1630 | -0.352108471 | -0.352108 | -0.352108471 | 3.342992021  | 1.660060041  | 2.501526031  |
| 1633 | -0.352108471 | -0.352108 | -0.352108471 | 7.748025547  | 4.098960817  | 5.923493182  |
| 1634 | 6.501268473  | 7.478342  | 5.524194952  | 2.497057926  | 4.158869237  | 5.820680548  |
| 1635 | 8.23472817   | 7.8220941 | 8.028411128  | 8.969985822  | 7.621334376  | 6.27268293   |
| 1636 | 6.056053999  | 6.0736545 | 6.038453511  | -0.352108471 | -0.352108471 | -0.352108471 |
| 1639 | 6.939871798  | 4.9916691 | 8.888074492  | 8.611103295  | 7.458282885  | 6.305462474  |
| 1641 | 5.994260948  | 6.4917622 | 5.496759717  | 1.294339716  | 4.477947052  | 7.661554387  |
| 1642 | 7.611801192  | 7.9327429 | 8.253684552  | 6.481983938  | 7.91687825   | 9.351772563  |
| 1647 | 6.362251997  | 4.8880695 | 5.625160771  | -0.352108471 | -0.352108471 | -0.352108471 |
| 1649 | -0.352108471 | -0.352108 | -0.352108471 | 2.43016825   | 0.980363921  | 3.879972579  |
| 1650 | 3.852950883  | 5.8528638 | 7.852776811  | 7.660368015  | 7.422837243  | 7.185306472  |
| 1652 | 4.792303669  | 4.8000217 | 4.784585601  | 0.689815323  | -0.352108471 | 1.731739118  |
| 1653 | 4.564574005  | 9.157541  | 6.861057494  | 6.931936377  | 9.195295815  | 4.668576939  |
| 1654 | 7.849697843  | 3.1277379 | -1.594222092 | 6.235921161  | 7.11865072   | 5.353191602  |
| 1655 | 8.899662105  | 8.8097666 | 8.719871078  | 7.753529229  | 10.98008996  | 4.526968496  |
| 1656 | 7.993113414  | 9.9348067 | 6.051420176  | 8.232552636  | 7.483004983  | 6.73345733   |
| 1659 | -0.352108471 | -0.352108 | -0.352108471 | 6.385933003  | 4.493901872  | 5.439917437  |
| 1660 | -0.352108471 | -0.352108 | -0.352108471 | 6.946330252  | 7.409897489  | 6.482763014  |
| 1662 | 6.332466669  | 6.8958282 | 5.769105167  | -0.352108471 | -0.352108471 | -0.352108471 |
| 1665 | -0.352108471 | -0.352108 | -0.352108471 | 6.631846251  | 7.028891053  | 6.23480145   |
| 1674 | -0.352108471 | -0.352108 | -0.352108471 | 3.721462565  | 1.117651711  | 2.419557138  |
| 1676 | 8.510192321  | 8.5854667 | 8.660741086  | 6.32450851   | 8.843499506  | 3.805517514  |
| 1687 | -0.352108471 | -0.352108 | -0.352108471 | 8.852394722  | 5.494417177  | 2.136439632  |
| 1716 | -0.352108471 | -0.352108 | -0.352108471 | 6.604209278  | 5.896786008  | 7.311632548  |
| 1717 | -0.352108471 | -0.352108 | -0.352108471 | 6.949901658  | 5.198878666  | 8.70092465   |
| 1718 | -0.352108471 | -0.352108 | -0.352108471 | 7.06548215   | 7.065023967  | 7.064565785  |
| 1719 | 5.502018749  | 4.8024755 | 5.152247113  | 5.325716078  | 5.958603556  | 4.6928286    |

|      |              |           |              |              |              |              |
|------|--------------|-----------|--------------|--------------|--------------|--------------|
| 1723 | 6.137515038  | 5.7155573 | 6.559472732  | 5.979239285  | 6.038453511  | 5.920025058  |
| 1727 | 8.084585015  | 8.704899  | 7.464271031  | 8.727925041  | 10.50968422  | 9.618804633  |
| 1728 | 7.387645813  | 7.0049838 | 7.770307784  | 6.75383721   | 10.89039143  | 8.822114318  |
| 1729 | -0.352108471 | -0.352108 | -0.352108471 | 7.094111584  | 6.981982635  | 6.869853687  |
| 1734 | -0.352108471 | -0.352108 | -0.352108471 | 7.209478834  | 7.21486974   | 7.204087928  |
| 1736 | 3.239461324  | 7.46991   | 5.354685649  | 6.844297079  | 5.07242169   | 5.958359385  |
| 1738 | 4.397603875  | 5.2878552 | 6.178106535  | 1.036211897  | 1.14221151   | 0.930212283  |
| 1742 | 4.392034833  | 5.1925725 | 4.792303669  | 1.800562285  | 2.190292434  | 1.995427359  |
| 1744 | 2.740210233  | 5.9595841 | -0.479163617 | -0.352108471 | -0.352108471 | -0.352108471 |
| 1748 | -0.352108471 | -0.352108 | -0.352108471 | 6.368276372  | 5.704335255  | 5.040394138  |
| 1755 | 2.65059567   | 5.6532998 | -0.352108471 | -0.352108471 | -0.352108471 | -0.352108471 |
| 1759 | 5.939192221  | 3.9100937 | 7.968290767  | -0.352108471 | -0.352108471 | -0.352108471 |
| 1760 | 5.604099007  | 6.6741289 | 7.74415875   | 9.034746538  | 7.787391935  | 6.540037333  |
| 1762 | 5.320563245  | 4.6942966 | 5.946829881  | 5.115331184  | 5.958359385  | 6.801387585  |
| 1770 | -0.352108471 | -0.352108 | -0.352108471 | 8.18395236   | 4.73465025   | 6.459301305  |
| 1773 | 6.425543059  | 4.4779804 | 5.45176171   | 2.509108481  | 1.540978788  | 0.572849094  |
| 1774 | 6.640019393  | 6.6538708 | 6.626167961  | 5.983736712  | 6.002308672  | 5.965164752  |
| 1777 | 3.636824788  | 3.9195059 | 3.354143641  | 6.713776402  | 6.698467242  | 6.729085562  |
| 1778 | 7.607131056  | 10.035471 | 5.178791349  | 7.949702276  | 6.468891051  | 9.430513501  |
| 1780 | -0.352108471 | -0.352108 | -0.352108471 | 5.174371869  | -0.009187284 | 2.582592293  |
| 1783 | -0.352108471 | -0.352108 | -0.352108471 | 6.64789689   | 4.376964605  | 8.918829175  |
| 1785 | 7.58670563   | 5.3139    | 6.450302837  | 3.731848435  | 7.115488819  | 10.4991292   |
| 1786 | 3.972927419  | 1.8163872 | 2.894657322  | 4.237109033  | 6.225242708  | 5.23117587   |
| 1787 | 4.019059497  | 0.9546997 | 2.486879591  | 0.791292145  | 0.440372779  | 1.14221151   |
| 1789 | 6.01696972   | 4.8238115 | 5.420390631  | -0.352108471 | -0.352108471 | -0.352108471 |
| 1791 | -0.352108471 | -0.352108 | -0.352108471 | 5.738628126  | 5.731413688  | 5.745842563  |
| 1793 | 6.478389984  | 6.502263  | 6.526136073  | 5.669790487  | 5.980334028  | 6.290877569  |
| 1798 | -0.352108471 | -0.352108 | -0.352108471 | 4.400452081  | 4.688318557  | 4.112585606  |
| 1802 | -0.352108471 | -0.352108 | -0.352108471 | 0.897715333  | -0.352108471 | 2.147539136  |
| 1804 | 1.383520155  | -0.352108 | 3.119148782  | 7.317532598  | 4.726569252  | 6.022050925  |
| 1808 | 6.288510867  | 5.1178178 | 7.459203977  | 1.76984594   | 1.807952763  | 1.731739118  |
| 1809 | 4.89713088   | 6.1679668 | 7.438802737  | 7.419106394  | 6.388960531  | 8.449252258  |
| 1810 | 6.920625702  | 5.463922  | 4.007218348  | 6.650022381  | 6.192730084  | 5.735437788  |
| 1812 | 6.213940521  | 5.4283939 | 4.642847227  | -0.352108471 | -0.352108471 | -0.352108471 |
| 1813 | 2.807148571  | 2.4868796 | 2.166610612  | -0.352108471 | -0.352108471 | -0.352108471 |
| 1814 | -0.352108471 | -0.352108 | -0.352108471 | 2.686833264  | 1.631891607  | 3.74177492   |
| 1819 | -0.352108471 | -0.352108 | -0.352108471 | 6.588254064  | 6.617035395  | 6.559472732  |
| 1820 | 7.61631181   | 5.8244294 | 6.720370627  | 2.539666369  | 5.818133522  | 4.178899946  |
| 1821 | -0.352108471 | -0.352108 | -0.352108471 | 1.903060263  | 2.803125457  | 3.70319065   |
| 1822 | 6.390641462  | 5.3152335 | 5.852937462  | 7.999667835  | 9.195254682  | 8.597461258  |
| 1823 | 3.162868822  | 6.5053351 | 4.834101937  | 4.206460178  | 4.469833947  | 4.338147062  |
| 1825 | 10.174427    | 9.1628826 | 8.151338105  | 6.585491922  | 6.225162754  | 5.864833586  |
| 1829 | 9.22003869   | 7.7920339 | 6.364029159  | 7.028432398  | 8.712381009  | 5.344483787  |
| 1832 | 6.463674915  | 6.479333  | 6.448016836  | -0.352108471 | -0.352108471 | -0.352108471 |
| 1836 | 6.964857347  | 6.6853616 | 7.244353071  | 5.680782182  | 5.179697474  | 4.678612766  |
| 1837 | -0.352108471 | -0.352108 | -0.352108471 | 3.064586224  | 3.98563911   | 2.143533338  |
| 1839 | 6.991795048  | 7.6108104 | 6.372779721  | -0.352108471 | -0.352108471 | -0.352108471 |

|      |              |           |              |              |              |              |
|------|--------------|-----------|--------------|--------------|--------------|--------------|
| 1841 | -0.352108471 | -0.352108 | -0.352108471 | 6.12990004   | 6.135204448  | 6.124595632  |
| 1843 | 6.991795048  | 7.9553377 | 6.028252401  | 6.314219388  | 9.449713385  | 7.881966386  |
| 1844 | 3.139575061  | 2.5232121 | 1.906849153  | 0.044132154  | 0.440372779  | -0.352108471 |
| 1845 | -0.352108471 | -0.352108 | -0.352108471 | 7.271984511  | 2.332185309  | 4.80208491   |
| 1847 | 1.829261322  | 5.0171364 | 8.205011549  | -0.352108471 | -0.352108471 | -0.352108471 |
| 1848 | 6.874885195  | 3.8319206 | 9.917849822  | -0.352108471 | -0.352108471 | -0.352108471 |
| 1849 | -0.352108471 | -0.352108 | -0.352108471 | 6.829307464  | 6.845389604  | 6.813225323  |
| 1850 | 6.138313782  | 5.5386983 | 6.737929236  | -0.352108471 | -0.352108471 | -0.352108471 |
| 1854 | -0.352108471 | -0.352108 | -0.352108471 | 3.144788429  | 5.508216963  | 4.326502696  |
| 1855 | 7.252200787  | 6.4636749 | 5.675149042  | 7.245270264  | 2.340745104  | 4.793007684  |
| 1857 | 6.13125595   | 6.6872837 | 7.243311444  | 7.482997679  | 8.530268819  | 6.435726539  |
| 1861 | -0.352108471 | -0.352108 | -0.352108471 | 5.606077102  | 6.022050925  | 6.438024749  |
| 1869 | -0.352108471 | -0.352108 | -0.352108471 | 5.284974356  | 3.955367621  | 6.614581091  |
| 1870 | 4.468125456  | 6.7008873 | 8.933649045  | 4.365345369  | 6.420886033  | 5.393115701  |
| 1871 | -0.352108471 | -0.352108 | -0.352108471 | 4.872224191  | 4.843308497  | 4.901139884  |
| 1874 | 5.272495208  | 5.5842925 | 5.428393874  | 7.259636323  | 6.312650079  | 6.786143201  |
| 1877 | 6.97962556   | 6.7357797 | 6.491933812  | -0.352108471 | -0.352108471 | -0.352108471 |
| 1880 | 5.244074591  | 5.9002924 | 6.55651017   | -0.352108471 | -0.352108471 | -0.352108471 |
| 1889 | 7.799069185  | 8.6117255 | 8.205397321  | 7.459585129  | 7.927290912  | 7.69343802   |
| 1892 | 1.383520155  | -0.352108 | 3.119148782  | 7.412333057  | 7.426473409  | 7.398192705  |
| 1893 | 6.212536209  | 6.2312245 | 6.193847962  | 8.252081739  | 8.269909997  | 8.234253481  |
| 1902 | -0.352108471 | -0.352108 | -0.352108471 | 8.269807893  | 4.629915937  | 6.449861915  |
| 1903 | 4.713047203  | 3.2148412 | 6.211253202  | 9.145497431  | 5.938179821  | 7.541838626  |
| 1911 | -0.352108471 | -0.352108 | -0.352108471 | 6.958673191  | 6.517963851  | 6.07725451   |
| 1912 | -0.352108471 | -0.352108 | -0.352108471 | 6.799877676  | 5.369332089  | 3.938786501  |
| 1915 | 10.71300492  | 11.833459 | 11.27323211  | 12.67936545  | 12.85655788  | 12.76796167  |
| 1917 | -0.352108471 | -0.352108 | -0.352108471 | 3.009468748  | 2.348496817  | 1.687524887  |
| 1933 | 1.66201518   | 3.6761388 | -0.352108471 | 7.474897882  | 7.507270991  | 7.442524773  |
| 1936 | 6.819677119  | 6.6538708 | 6.985483415  | 8.579128565  | 8.610681049  | 8.547576081  |
| 1937 | 8.721951213  | 9.6226099 | 10.52326854  | 10.00821774  | 9.454144854  | 10.56229063  |
| 1938 | 10.01889761  | 11.038047 | 8.999748397  | 11.11443299  | 13.45612985  | 8.772736119  |
| 1947 | 3.127737875  | 3.136327  | 3.119148782  | 5.957990428  | 6.345275458  | 6.732560487  |
| 1951 | 7.551136183  | 5.216011  | 9.886261346  | 4.718925108  | 2.937235468  | 3.828080288  |
| 1953 | 10.32261405  | 7.1837671 | 4.044920243  | -0.352108471 | -0.352108471 | -0.352108471 |
| 1954 | 7.358525885  | 6.9543587 | 7.156442283  | 6.448016836  | 6.191251389  | 6.704782282  |
| 1955 | 6.075624757  | 5.6682361 | 6.483013419  | 3.081409479  | 1.731739118  | 4.43107984   |
| 1956 | 4.417353062  | 5.7155573 | 3.119148782  | -0.352108471 | -0.352108471 | -0.352108471 |
| 1958 | 6.94286187   | 8.086273  | 9.229684161  | 8.087563681  | 7.637943112  | 7.188322542  |
| 1960 | -0.352108471 | -0.352108 | -0.352108471 | 1.995427359  | 3.048961466  | 0.941893252  |
| 1964 | 1.783698732  | 0.5510803 | 3.016317123  | 6.602327568  | 9.052108333  | 7.82721795   |
| 1965 | -0.352108471 | -0.352108 | -0.352108471 | 5.88700099   | 4.770743989  | 7.003257991  |
| 1967 | -0.352108471 | -0.352108 | -0.352108471 | 5.430776207  | 6.288458531  | 5.859617369  |
| 1968 | 3.238451656  | 8.9470353 | 6.092743499  | 7.47686742   | 6.000603181  | 8.953131659  |
| 1969 | 7.415794329  | 4.4367298 | 10.39485886  | 8.03312524   | 5.747533079  | 6.89032916   |
| 1974 | -0.352108471 | -0.352108 | -0.352108471 | 6.762354676  | 8.879871748  | 4.644837604  |
| 1975 | 5.210557151  | 7.7832115 | 10.35586577  | 7.716233411  | 7.411296222  | 7.563764816  |
| 1977 | -0.352108471 | -0.352108 | -0.352108471 | 6.60629489   | 7.364389464  | 8.122484038  |



|      |              |           |              |              |              |              |
|------|--------------|-----------|--------------|--------------|--------------|--------------|
| 1978 | 3.779783043  | 3.1277379 | 2.475692708  | 8.184171588  | 6.311517561  | 7.247844574  |
| 1979 | 4.038879774  | 2.8988472 | 5.17891231   | 8.931389383  | 6.810729352  | 7.871059368  |
| 1981 | 7.232769588  | 7.0871828 | 6.941596071  | 6.275940615  | 9.817325738  | 8.046633176  |
| 1982 | 8.550581697  | 6.8821228 | 10.21904061  | 9.373381371  | 9.394474737  | 9.352288005  |
| 1983 | -0.352108471 | -0.352108 | -0.352108471 | 5.068424575  | 8.56150726   | 6.814965918  |
| 1984 | 8.157306673  | 10.173586 | 6.141027042  | 8.871451931  | 8.249712725  | 9.493191137  |
| 1992 | 3.047954182  | -0.352108 | 6.448016836  | 6.69485278   | 6.813225323  | 6.576480236  |
| 1994 | 5.90029238   | 5.9200251 | 5.880559702  | 5.147625378  | 5.315258837  | 4.979991919  |
| 1999 | -0.352108471 | -0.352108 | -0.352108471 | 2.211943219  | 1.659465911  | 2.764420527  |
| 2000 | 6.273832259  | 8.9728684 | 3.574796159  | 6.881092742  | 6.830443436  | 6.779794129  |
| 2002 | 5.59604745   | 5.7494021 | 5.902756779  | 6.682822443  | 8.640940677  | 4.724704208  |
| 2005 | 7.217370652  | 5.7873247 | 6.502347686  | 0.647185709  | 1.646479888  | -0.352108471 |
| 2009 | 4.534306991  | 8.5404605 | 6.537383725  | 0.647185709  | -0.352108471 | 1.646479888  |
| 2010 | -0.352108471 | -0.352108 | -0.352108471 | 6.022050925  | 8.197541932  | 3.846559918  |
| 2012 | 9.900657447  | 7.8566258 | 5.812594129  | 7.916361598  | 6.541009048  | 5.165656497  |
| 2013 | 6.588414849  | 8.8690477 | 7.728731298  | 8.229724893  | 3.600081514  | 5.914903203  |
| 2014 | 7.224081961  | 9.2546956 | 5.193468359  | 6.761780888  | 9.219513114  | 7.990647001  |
| 2017 | 7.449848118  | 7.508442  | 7.391254223  | 7.737676913  | 7.763252455  | 7.712101371  |
| 2022 | 9.236645641  | 9.324648  | 9.148643248  | 10.6646886   | 8.253523763  | 5.842358922  |
| 2023 | 9.645977583  | 8.7405815 | 10.55137369  | 10.01770257  | 12.00381431  | 8.031590818  |
| 2029 | -0.352108471 | -0.352108 | -0.352108471 | 5.089408562  | 4.80208491   | 4.514761259  |
| 2030 | -0.352108471 | -0.352108 | -0.352108471 | 4.80208491   | 4.843308497  | 4.760861323  |
| 2034 | 7.932742872  | 7.960348  | 7.905137775  | 6.160141861  | 6.246629235  | 6.073654487  |
| 2035 | 4.449748927  | 6.0051143 | 2.894383523  | 5.645239247  | 4.375206621  | 5.010222934  |
| 2036 | 4.896826685  | 8.6774415 | 6.787134073  | -0.352108471 | -0.352108471 | -0.352108471 |
| 2037 | -0.352108471 | -0.352108 | -0.352108471 | 5.693086522  | 6.631846251  | 7.570605981  |
| 2040 | 7.496938343  | 6.5488069 | 8.445069752  | -0.352108471 | -0.352108471 | -0.352108471 |
| 2041 | -0.352108471 | -0.352108 | -0.352108471 | 4.927679215  | 6.093580961  | 3.761777469  |
| 2043 | -0.352108471 | -0.352108 | -0.352108471 | 4.233458039  | 4.68031436   | 4.456886199  |
| 2048 | 6.446690805  | 7.4143359 | 5.479045719  | -0.352108471 | -0.352108471 | -0.352108471 |
| 2050 | 4.275930666  | 2.7543518 | 3.515141236  | 7.86582773   | 7.342844162  | 8.388811297  |
| 2052 | 6.833304259  | 5.8023642 | 6.317834233  | 4.878842175  | 6.514259464  | 5.69655082   |
| 2054 | 5.420819363  | 5.8812424 | 4.960396365  | 3.120807694  | 2.686833264  | 3.554782125  |
| 2055 | -0.352108471 | -0.352108 | -0.352108471 | 8.465812629  | 4.927679215  | 1.389545801  |
| 2058 | -0.352108471 | -0.352108 | -0.352108471 | 5.529311366  | 2.623713044  | 8.434909688  |
| 2059 | -0.352108471 | -0.352108 | -0.352108471 | 7.412333057  | 7.006006406  | 7.818659708  |
| 2060 | -0.352108471 | -0.352108 | -0.352108471 | 6.165870606  | 4.952524001  | 7.379217211  |
| 2065 | 7.695546702  | 6.9511513 | 7.323349013  | 1.825329981  | 2.641494844  | 1.009165119  |
| 2068 | -0.352108471 | -0.352108 | -0.352108471 | 8.299332542  | 6.51496239   | 4.730592239  |
| 2069 | 5.08289799   | 3.0818222 | 4.08236011   | 6.44500631   | 4.240633614  | 5.342819962  |
| 2070 | -0.352108471 | -0.352108 | -0.352108471 | 4.80208491   | 4.671268472  | 4.932901348  |
| 2071 | -0.352108471 | -0.352108 | -0.352108471 | 4.178899946  | 4.551431141  | 3.80636875   |
| 2072 | 7.210568768  | 6.9786128 | 7.442524773  | 2.585128717  | 3.119148782  | 2.051108653  |
| 2077 | -0.352108471 | -0.352108 | -0.352108471 | 7.747692536  | 5.494417177  | 3.241141818  |
| 2079 | 3.127737875  | 3.136327  | 3.119148782  | 7.83170519   | 7.85000045   | 7.813409929  |
| 2091 | -0.352108471 | -0.352108 | -0.352108471 | 6.345275458  | 6.701057834  | 5.989493081  |
| 2098 | 6.598403711  | 7.185766  | 7.773128285  | 5.983736712  | 4.955631715  | 7.011841709  |



|      |              |           |              |              |              |              |
|------|--------------|-----------|--------------|--------------|--------------|--------------|
| 2099 | -0.352108471 | -0.352108 | -0.352108471 | 6.330004048  | 6.276856601  | 6.383151496  |
| 2101 | 8.61424024   | 5.3651483 | 6.989694288  | 2.20636753   | 2.211943219  | 2.217518907  |
| 2107 | 5.456140284  | 7.3814837 | 3.530796835  | 7.046260879  | 6.147254752  | 6.596757815  |
| 2108 | -0.352108471 | -0.352108 | -0.352108471 | 5.663737322  | 5.207152599  | 6.120322045  |
| 2109 | -0.352108471 | -0.352108 | -0.352108471 | 4.79472922   | 4.153789937  | 5.435668504  |
| 2113 | 5.570057478  | 4.6641742 | 5.117115863  | 6.258034115  | 6.889903884  | 6.573968999  |
| 2114 | 7.692181027  | 6.5373837 | 5.382586422  | -0.352108471 | -0.352108471 | -0.352108471 |
| 2115 | 5.217491139  | 4.9287584 | 5.506223914  | 5.894225185  | 5.458255064  | 5.022284943  |
| 2117 | -0.352108471 | -0.352108 | -0.352108471 | 5.416220218  | 0.482407625  | 2.949313922  |
| 2120 | -0.352108471 | -0.352108 | -0.352108471 | 5.234766675  | 6.038453511  | 4.43107984   |
| 2121 | -0.352108471 | -0.352108 | -0.352108471 | 7.178903471  | 6.81196605   | 6.44502863   |
| 2122 | 6.5002282    | 3.9037242 | 9.096732239  | 7.400897894  | 5.627005534  | 3.853113173  |
| 2125 | 6.242048279  | 8.0947746 | 4.389321912  | -0.352108471 | -0.352108471 | -0.352108471 |
| 2130 | -0.352108471 | -0.352108 | -0.352108471 | 8.424196     | 8.280175894  | 8.136155787  |
| 2131 | 8.759352771  | 6.8743147 | 7.816833734  | 8.500231745  | 8.511761357  | 8.488702132  |
| 2132 | -0.352108471 | -0.352108 | -0.352108471 | 6.923295051  | 6.946414218  | 6.900175883  |
| 2135 | -0.352108471 | -0.352108 | -0.352108471 | 6.515221104  | 5.528880746  | 6.022050925  |
| 2137 | -0.352108471 | -0.352108 | -0.352108471 | 5.375906715  | 6.165870606  | 6.955834497  |
| 2139 | -0.352108471 | -0.352108 | -0.352108471 | 2.080138319  | 4.898975698  | 7.717813077  |
| 2149 | 7.673425716  | 7.7658364 | 7.581015059  | 7.535088133  | 7.481351049  | 7.508219591  |
| 2151 | -0.352108471 | -0.352108 | -0.352108471 | 2.19005738   | 2.232575625  | 2.147539136  |
| 2152 | 10.05837813  | 6.3905161 | 8.224447097  | 10.65873184  | 7.033152281  | 8.845942058  |
| 2153 | 6.942665805  | 4.8131929 | 9.072138752  | 8.541410162  | 4.727980486  | 6.634695324  |
| 2159 | 3.308991012  | 4.3023377 | 3.805664353  | 6.565372851  | 6.085247509  | 6.32531018   |
| 2180 | -0.352108471 | -0.352108 | -0.352108471 | 3.306254385  | 4.456886199  | 5.607518014  |
| 2182 | -0.352108471 | -0.352108 | -0.352108471 | 5.529311366  | 7.256880981  | 3.80174175   |
| 2185 | -0.352108471 | -0.352108 | -0.352108471 | 2.322627657  | 2.124237496  | 1.925847335  |
| 2186 | 6.041233575  | 7.3777551 | 8.714276692  | -0.352108471 | -0.352108471 | -0.352108471 |
| 2188 | 6.286751578  | 6.5546628 | 7.822574067  | 4.557244691  | 3.614411483  | 3.500077898  |
| 2189 | 2.65059567   | 4.5440465 | 0.757144822  | -0.352108471 | -0.352108471 | -0.352108471 |
| 2191 | 6.551606154  | 5.5587679 | 4.565929586  | 6.783875524  | 9.099356912  | 7.941616218  |
| 2192 | 9.371543471  | 6.5625652 | 7.967054352  | 8.368838247  | 7.454049592  | 7.91144392   |
| 2193 | 2.046297133  | 10.618636 | 6.332466669  | -0.352108471 | -0.352108471 | -0.352108471 |
| 2194 | 2.379705706  | 7.8440457 | 5.111875725  | 7.684929473  | 8.376100243  | 6.993758704  |
| 2195 | 6.763594968  | 7.3603202 | 7.957045342  | 6.418164666  | 5.140197889  | 7.696131453  |
| 2196 | 6.30803701   | 6.502263  | 6.696489047  | -0.352108471 | -0.352108471 | -0.352108471 |
| 2197 | 6.433318728  | 5.8377149 | 7.028922543  | 6.981888777  | 7.003831781  | 6.959945773  |
| 2199 | 6.659204891  | 6.8637753 | 6.454634494  | 7.324498278  | 4.166290649  | 5.745394463  |
| 2200 | 6.463674915  | 6.479333  | 6.448016836  | 2.076022254  | 2.100935855  | 2.051108653  |
| 2201 | 4.474008088  | 7.2318668 | 5.852937462  | 5.746917231  | 6.998915179  | 4.494919283  |
| 2203 | 4.091800068  | 5.2460267 | 4.668913391  | -0.352108471 | -0.352108471 | -0.352108471 |
| 2204 | 7.634347441  | 8.2897006 | 6.978994273  | 4.618894849  | 6.754558526  | 8.890222202  |
| 2206 | 6.210579573  | 3.9271055 | 5.06884253   | 3.832339467  | 2.100935855  | 5.563743079  |
| 2207 | -0.352108471 | -0.352108 | -0.352108471 | 2.169424975  | 1.625447907  | 2.713402042  |
| 2214 | 6.696903716  | 6.6741289 | 6.651354042  | -0.352108471 | -0.352108471 | -0.352108471 |
| 2217 | 7.458282885  | 8.5020748 | 6.414490975  | 6.804723141  | 5.271355789  | 8.338090493  |
| 2219 | 7.017628004  | 4.8607564 | 5.939192221  | -0.352108471 | -0.352108471 | -0.352108471 |

|      |              |           |              |              |              |              |
|------|--------------|-----------|--------------|--------------|--------------|--------------|
| 2222 | 3.683980801  | 5.1693991 | 2.198562478  | 7.841286877  | 8.173357876  | 8.007322377  |
| 2224 | 7.016776417  | 6.0761857 | 7.957367182  | 1.146563148  | 1.783698732  | 2.420834317  |
| 2230 | -0.352108471 | -0.352108 | -0.352108471 | 1.153691946  | 2.902991023  | 4.652290099  |
| 2232 | -0.352108471 | -0.352108 | -0.352108471 | 5.821834654  | 6.766850887  | 6.294342771  |
| 2235 | -0.352108471 | -0.352108 | -0.352108471 | 2.724072976  | 3.677812865  | 4.631552755  |
| 2237 | 3.726842123  | 1.8410745 | 2.783958294  | -0.352108471 | -0.352108471 | -0.352108471 |
| 2242 | -0.352108471 | -0.352108 | -0.352108471 | 5.958359385  | 7.333941542  | 4.582777227  |
| 2244 | 5.765810019  | 4.3067107 | 7.224909308  | 0.808855576  | 0.808855576  | 0.808855576  |
| 2245 | -0.352108471 | -0.352108 | -0.352108471 | 7.549492193  | 5.021616724  | 6.285554459  |
| 2247 | 1.392109249  | 3.136327  | -0.352108471 | 9.6558732    | 4.763084469  | 7.209478834  |
| 2250 | 9.597687225  | 12.671049 | 11.13436836  | 9.730301708  | 9.158004197  | 10.30259922  |
| 2252 | 3.672022488  | 7.4455133 | 5.55876787   | 5.567737755  | 6.476364095  | 6.022050925  |
| 2254 | -0.352108471 | -0.352108 | -0.352108471 | 5.400974508  | 5.760537073  | 6.120099638  |
| 2255 | -0.352108471 | -0.352108 | -0.352108471 | 0.95025487   | 2.252618212  | -0.352108471 |
| 2260 | 4.699855738  | 3.6761388 | 5.723572646  | 7.556478335  | 7.578336491  | 7.534620179  |
| 2271 | 6.888413829  | 7.8452378 | 5.931589838  | 5.760537073  | 9.835666209  | 1.685407937  |
| 2273 | 6.369156591  | 5.7524106 | 6.985902626  | 4.398556261  | 11.85187139  | 8.125213827  |
| 2274 | 6.640019393  | 6.2886778 | 6.991360979  | 8.160328149  | 8.121597162  | 8.082866175  |
| 2280 | 4.689234271  | 8.8198828 | 6.754558526  | 7.728772973  | 6.886610445  | 6.044447917  |
| 2282 | 7.1250675    | 7.7328126 | 6.517322371  | 8.150840899  | 7.136426663  | 6.122012426  |
| 2286 | 3.349849757  | 9.3150836 | 6.332466669  | 9.248218001  | 7.082757193  | 4.917296386  |
| 2287 | 7.563139502  | 6.3968684 | 5.230597263  | 2.169424975  | 2.191310813  | 2.147539136  |
| 2288 | 7.639654029  | 3.722998  | 5.681326035  | -0.352108471 | -0.352108471 | -0.352108471 |
| 2289 | -0.352108471 | -0.352108 | -0.352108471 | 3.354121925  | 3.585121301  | 3.816120677  |
| 2297 | -0.352108471 | -0.352108 | -0.352108471 | 6.840114058  | 5.458724769  | 8.221503348  |
| 2302 | -0.352108471 | -0.352108 | -0.352108471 | 6.369156591  | 10.35472451  | 2.38358867   |
| 2305 | -0.352108471 | -0.352108 | -0.352108471 | 5.96988645   | 6.938916709  | 6.454401579  |
| 2309 | 6.104429468  | 8.4779124 | 3.730946491  | 6.866100805  | 7.427300611  | 6.304901     |
| 2310 | 5.84844837   | 6.1122684 | 6.376088439  | 1.117721484  | 1.305230684  | 0.930212283  |
| 2314 | 7.641521483  | 7.6935991 | 7.745676625  | 9.15598567   | 7.598869975  | 6.041754279  |
| 2315 | 6.673731665  | 6.0968157 | 6.385273697  | 2.449166203  | 2.902991023  | 3.356815842  |
| 2316 | 11.55446531  | 10.512475 | 9.470484251  | 10.36630957  | 11.82947108  | 13.29263259  |
| 2317 | -0.525004821 | 5.4275862 | 2.451290702  | 5.688622647  | 4.187591105  | 7.189654189  |
| 2318 | 9.982663572  | 8.5575689 | 7.13247418   | 9.532966436  | 7.74575082   | 8.639358628  |
| 2319 | 9.035948539  | 6.1348006 | 3.233652691  | 6.261742918  | 5.528542175  | 6.99494366   |
| 2321 | -0.352108471 | -0.352108 | -0.352108471 | 1.874819493  | 3.15657568   | 2.515697587  |
| 2323 | -0.352108471 | -0.352108 | -0.352108471 | 6.935013718  | 6.165870606  | 5.396727494  |
| 2332 | -0.352108471 | -0.352108 | -0.352108471 | 6.235921161  | 6.505633794  | 5.966208528  |
| 2335 | 8.181629182  | 8.6650457 | 7.698212656  | 9.102693505  | 9.102693505  | 9.102693505  |
| 2339 | -0.352108471 | -0.352108 | -0.352108471 | 6.32531018   | 6.33538923   | 6.31523113   |
| 2350 | -0.352108471 | -0.352108 | -0.352108471 | 5.584676343  | 7.410292288  | 3.759060398  |
| 2353 | 5.85030116   | 5.5587679 | 5.26723458   | 6.345275458  | 7.618072573  | 5.072478342  |
| 2354 | 6.609225976  | 0.4210565 | 3.515141236  | 4.920682473  | 6.846853879  | 8.773025285  |
| 2355 | -0.352108471 | -0.352108 | -0.352108471 | 9.417033112  | 6.27294594   | 7.844989526  |
| 2356 | 3.515141236  | 4.1520868 | 2.8781957    | 7.146302205  | 6.28095301   | 8.011651399  |
| 2395 | 8.205860956  | 8.3595966 | 8.513332228  | 7.25414833   | 7.922309521  | 7.588228926  |
| 2475 | 4.125607521  | 6.0532169 | 5.089412202  | 3.590870952  | 2.647426611  | 3.119148782  |

|      |              |           |              |              |              |              |
|------|--------------|-----------|--------------|--------------|--------------|--------------|
| 2483 | 7.61679815   | 6.832171  | 7.224484585  | 0.044132154  | 0.440372779  | -0.352108471 |
| 2487 | 10.08538839  | 2.8419614 | 6.463674915  | -0.352108471 | -0.352108471 | -0.352108471 |
| 2495 | 11.22548609  | 13.06983  | 12.14765807  | 12.17189408  | 12.44248541  | 11.90130275  |
| 2512 | 12.36698484  | 12.284928 | 12.2028719   | 12.21333291  | 13.78504098  | 12.99918694  |
| 2517 | -0.352108471 | -0.352108 | -0.352108471 | 5.745394463  | 4.331476087  | 7.159312839  |
| 2521 | 10.16942051  | 9.1222681 | 8.075115628  | 9.002076863  | 8.243372387  | 7.48466791   |
| 2523 | 8.053495589  | 8.6475911 | 7.459400044  | 5.395888616  | 5.955808726  | 5.675848671  |
| 2524 | 7.123881271  | 7.4351711 | 7.746460916  | 3.730614766  | 7.51811256   | 5.624363663  |
| 2526 | 2.740477604  | 4.7885798 | 6.836681921  | 3.606283772  | 6.635383637  | 0.577183907  |
| 2531 | 7.373857007  | 7.2622793 | 7.485434673  | 5.297807945  | 5.529311366  | 5.066304524  |
| 2535 | 5.092988638  | 6.0583172 | 7.023645731  | 5.86687125   | 8.705778044  | 7.286324647  |
| 2538 | 4.00769727   | 4.0872577 | 4.166818059  | 2.732213788  | 1.456674477  | 2.094444132  |
| 2539 | 6.590838154  | 4.6643799 | 8.517296439  | 5.551927689  | 7.040160042  | 6.296043865  |
| 2547 | 6.022396261  | 7.0634138 | 8.104431351  | 8.285404702  | 7.840701215  | 8.063052958  |
| 2551 | -0.352108471 | -0.352108 | -0.352108471 | 3.119148782  | 3.119148782  | 3.119148782  |
| 2553 | -0.352108471 | -0.352108 | -0.352108471 | 5.095423988  | 5.124543452  | 5.066304524  |
| 2564 | 4.768486756  | 3.633531  | 5.903442506  | -0.352108471 | -0.352108471 | -0.352108471 |
| 2582 | 6.960683454  | 5.646239  | 6.303461245  | 8.820355491  | 6.49796827   | 7.659161881  |
| 2589 | -0.352108471 | -0.352108 | -0.352108471 | 5.169157826  | 5.065627102  | 5.272688549  |
| 2590 | -0.352108471 | -0.352108 | -0.352108471 | 7.125013876  | 7.359723467  | 6.890304284  |
| 2591 | 6.332466669  | 3.5505276 | 9.114405751  | -0.352108471 | -0.352108471 | -0.352108471 |
| 2592 | 6.183964016  | 6.1999612 | 6.167966808  | -0.352108471 | -0.352108471 | -0.352108471 |
| 2593 | -0.352108471 | -0.352108 | -0.352108471 | 2.686833264  | 2.686833264  | 2.686833264  |
| 2596 | 5.444884047  | 6.7357797 | 8.026675325  | -0.352108471 | -0.352108471 | -0.352108471 |
| 2597 | 11.2013696   | 13.248453 | 9.154286333  | 10.20560039  | 13.70840565  | 11.95700302  |
| 2617 | 6.151585628  | 6.555673  | 5.747498225  | 6.200625599  | 7.679737185  | 9.158848772  |
| 2618 | -0.352108471 | -0.352108 | -0.352108471 | 3.919505936  | 3.919505936  | 3.919505936  |
| 2619 | -0.352108471 | -0.352108 | -0.352108471 | 6.285554459  | 8.635408942  | 3.935699975  |
| 2621 | 8.686519674  | 8.7166969 | 8.656342398  | 7.556606428  | 7.584456235  | 7.528756621  |
| 2624 | 7.650812904  | 6.562628  | 8.738997828  | 11.02495564  | 3.326127054  | 7.175541346  |
| 2629 | -0.352108471 | -0.352108 | -0.352108471 | 3.993166125  | 4.415028907  | 4.204097516  |
| 2632 | -0.352108471 | -0.352108 | -0.352108471 | 6.923170513  | 4.580410295  | 9.26593073   |
| 2633 | 6.17278307   | 7.0419718 | 6.607377459  | 6.463674915  | 8.52096852   | 4.406381309  |
| 2634 | -0.352108471 | -0.352108 | -0.352108471 | 7.904564082  | 5.922413715  | 6.913488898  |
| 2635 | 6.573968999  | 5.1119583 | 8.035979731  | -0.352108471 | -0.352108471 | -0.352108471 |
| 2647 | -0.352108471 | -0.352108 | -0.352108471 | 5.555939844  | 6.089618607  | 5.022261081  |
| 2648 | 7.186619416  | 6.8886555 | 7.484583343  | 3.919505936  | 5.436777163  | 2.402234708  |
| 2649 | 8.108921488  | 7.7121014 | 8.505741605  | 5.145086344  | 5.529311366  | 4.760861323  |
| 2650 | -0.352108471 | -0.352108 | -0.352108471 | 5.260797528  | 6.056053999  | 6.85131047   |
| 2664 | 7.876988749  | 9.2138527 | 6.540124817  | 7.101935164  | 5.856585589  | 6.479260377  |
| 2665 | 6.258419638  | 6.5373837 | 6.816347811  | 5.839721471  | 5.60724956   | 5.723485516  |
| 2673 | 8.138146831  | 10.200446 | 6.075848034  | 6.285577398  | 7.588326356  | 8.891075314  |
| 2674 | -0.352108471 | -0.352108 | -0.352108471 | 2.469725738  | 2.686833264  | 2.252618212  |
| 2675 | -0.352108471 | -0.352108 | -0.352108471 | 5.016362163  | 5.017910708  | 5.017136436  |
| 2677 | 6.146695615  | 7.1310468 | 6.638871208  | 1.761670631  | 1.646479888  | 1.876861374  |
| 2683 | 7.9572782    | 8.166821  | 8.062049619  | 9.070767821  | 6.47267644   | 3.874585059  |
| 2690 | 5.816094076  | 6.0565695 | 6.297044835  | -0.352108471 | -0.352108471 | -0.352108471 |

|      |              |           |              |              |              |              |
|------|--------------|-----------|--------------|--------------|--------------|--------------|
| 2697 | 6.89992346   | 6.9268019 | 6.873045007  | 8.678484689  | 8.692723556  | 8.664245823  |
| 2700 | -0.352108471 | -0.352108 | -0.352108471 | 6.484812654  | 5.845499835  | 5.206187016  |
| 2702 | 6.537383725  | 6.3957135 | 6.679053947  | 4.804144212  | 7.112574557  | 5.958359385  |
| 2706 | 5.800199788  | 5.8503502 | 5.750049386  | -0.352108471 | -0.352108471 | -0.352108471 |
| 2720 | 5.999964988  | 9.3249334 | 7.662449217  | -0.352108471 | -0.352108471 | -0.352108471 |
| 2730 | 6.093440296  | 7.1611846 | 8.228929001  | 5.132034894  | 7.080858494  | 6.106446694  |
| 2734 | 5.569701552  | 7.0843391 | 8.59897666   | 9.555754306  | 8.076342711  | 6.596931117  |
| 2735 | -0.352108471 | -0.352108 | -0.352108471 | 3.919505936  | 3.919505936  | 3.919505936  |
| 2738 | -0.352108471 | -0.352108 | -0.352108471 | 5.704335255  | 4.731640353  | 6.677030157  |
| 2739 | 5.852937462  | 6.8492035 | 4.856671472  | 11.13010065  | 4.867725119  | 7.998912883  |
| 2740 | 4.408656986  | 7.8344006 | 6.121528769  | -0.352108471 | -0.352108471 | -0.352108471 |
| 2745 | 9.77971259   | 9.874147  | 9.685278138  | 9.944857578  | 9.944857578  | 9.944857578  |
| 2746 | 5.688622647  | 7.9211495 | 3.45609575   | 6.26481039   | 5.637296679  | 5.009782968  |
| 2749 | -0.352108471 | -0.352108 | -0.352108471 | 8.026190996  | 4.476933655  | 6.251562326  |
| 2752 | 7.606017131  | 7.9352485 | 8.264479906  | 9.150898656  | 8.077831649  | 7.004764642  |
| 2760 | 7.92219406   | 6.6552114 | 7.288702744  | 6.146432796  | 6.1418345    | 6.151031091  |
| 2762 | -0.352108471 | -0.352108 | -0.352108471 | 7.269863612  | 6.203704376  | 8.336022848  |
| 2764 | -0.352108471 | -0.352108 | -0.352108471 | 7.559538207  | 7.74933204   | 7.369744374  |
| 2767 | 6.926801914  | 4.7635308 | 9.090073008  | 6.997455924  | 5.840530024  | 8.154381824  |
| 2768 | 5.054293344  | 8.5504874 | 6.802390362  | 9.681322766  | 8.061481385  | 6.441640003  |
| 2770 | -0.352108471 | -0.352108 | -0.352108471 | 7.145187302  | 7.532202005  | 7.338694653  |
| 2771 | 8.707510774  | 6.5293011 | 10.8857204   | 8.799502368  | 9.294226052  | 9.04686421   |
| 2773 | 3.966480855  | 3.5557829 | 3.761131874  | 6.785944301  | 6.757762328  | 6.814126275  |
| 2775 | 4.01071017   | 5.4283939 | 6.846077578  | -0.352108471 | -0.352108471 | -0.352108471 |
| 2776 | 2.811927891  | 5.6785007 | 4.245214285  | 7.428834872  | 4.650467954  | 6.039651413  |
| 2778 | 10.29884091  | 8.9488622 | 9.623851561  | 8.671182321  | 10.21444565  | 11.75770899  |
| 2782 | 7.481209945  | 8.1296288 | 7.805419383  | 8.839674519  | 8.372682046  | 9.306666991  |
| 2783 | 6.303794181  | 7.0871828 | 7.870571479  | 8.878326382  | 10.03241983  | 7.724232938  |
| 2786 | 6.635116535  | 8.4701868 | 7.552651643  | 5.747617149  | 4.544763662  | 6.950470636  |
| 2787 | 8.062049619  | 6.6193371 | 9.504762185  | 8.539184559  | 9.546437387  | 7.531931731  |
| 2791 | 6.440388338  | -0.184913 | 3.127737875  | 7.983511276  | 5.235574771  | 6.609543024  |
| 2794 | 7.424012079  | 6.9916642 | 7.207838162  | 0.235164116  | 8.122635775  | 4.178899946  |
| 2799 | 7.336298251  | 7.4498036 | 7.39305092   | 8.222041546  | 7.112594586  | 6.003147626  |
| 2800 | -0.352108471 | -0.352108 | -0.352108471 | 7.555631787  | 4.63696661   | 6.096299198  |
| 2801 | 8.940128237  | 6.8355031 | 7.887815677  | 3.847881823  | 7.156915368  | 5.502398596  |
| 2802 | 7.359058494  | 8.2892025 | 6.428914528  | 6.38341389   | 7.439230644  | 8.495047398  |
| 2803 | 6.242048279  | 4.156177  | 8.327919596  | 6.576200407  | 6.217536358  | 6.396868383  |
| 2804 | -0.352108471 | -0.352108 | -0.352108471 | 6.243205572  | 6.348061445  | 6.295633508  |
| 2805 | 6.020010435  | 4.2844838 | 5.152247113  | -1.076607949 | 1.223721097  | 3.524050143  |
| 2806 | 4.028701554  | 7.571698  | 5.800199788  | 5.133550664  | 7.203822097  | 9.27409353   |
| 2814 | 5.939192221  | 6.5659524 | 5.312432092  | -0.352108471 | -0.352108471 | -0.352108471 |
| 2817 | 8.04233763   | 6.5303117 | 7.286324647  | 8.459742919  | 9.041130421  | 9.622517923  |
| 2820 | -0.352108471 | -0.352108 | -0.352108471 | 5.939192221  | 4.798732669  | 7.079651774  |
| 2821 | 5.502720352  | 7.5720471 | 6.537383725  | 8.157650828  | 8.886414932  | 7.428886724  |
| 2822 | 6.67196754   | 5.1668445 | 8.177090578  | 5.850738532  | 6.150437391  | 6.000587961  |
| 2823 | 6.273832259  | 6.2858739 | 6.261790604  | -0.352108471 | -0.352108471 | -0.352108471 |
| 2825 | 5.414783571  | 5.2365191 | 5.325651342  | 5.959506607  | 4.826052208  | 7.092961005  |

|      |              |           |              |              |              |              |
|------|--------------|-----------|--------------|--------------|--------------|--------------|
| 2835 | 7.188487283  | 4.3453722 | 5.766929757  | 0.95025487   | 2.252618212  | -0.352108471 |
| 2846 | 6.674128879  | 6.6898785 | 6.658379305  | -0.352108471 | -0.352108471 | -0.352108471 |
| 2848 | 6.239860938  | 5.5371901 | 6.942531774  | -0.352108471 | -0.352108471 | -0.352108471 |
| 2849 | 6.881031277  | 5.6886226 | 4.496214017  | -0.352108471 | -0.352108471 | -0.352108471 |
| 2852 | -0.352108471 | -0.352108 | -0.352108471 | 3.503248387  | 6.835067264  | 5.169157826  |
| 2856 | 3.644963209  | 5.4283939 | 7.211824539  | -0.352108471 | -0.352108471 | -0.352108471 |
| 2859 | 2.993849458  | 5.0522677 | 7.110685912  | -0.352108471 | -0.352108471 | -0.352108471 |
| 2861 | -0.352108471 | -0.352108 | -0.352108471 | 6.415928975  | 6.986047344  | 5.845810605  |
| 2869 | 2.816880127  | 8.1706863 | 5.493783215  | -0.352108471 | -0.352108471 | -0.352108471 |
| 2870 | -0.352108471 | -0.352108 | -0.352108471 | 2.169424975  | -0.810084366 | 5.148934315  |
| 2872 | 3.002133479  | 3.4883371 | 3.245235305  | 7.449423849  | 7.574730164  | 7.700036479  |
| 2873 | 5.493783215  | 2.6029821 | 8.384584344  | 7.120446052  | 6.986345374  | 7.254546729  |
| 2874 | 6.402969886  | 5.1974297 | 5.800199788  | 7.744942324  | 6.852201546  | 7.298571935  |
| 2876 | 8.198897972  | 7.4106255 | 8.987170458  | 6.512966919  | 8.793387128  | 11.07380734  |
| 2879 | 8.885127417  | 7.8618358 | 6.838544105  | 5.032240293  | 6.505960865  | 7.979681437  |
| 2882 | 5.184151491  | 5.2437595 | 5.124543452  | -0.352108471 | -0.352108471 | -0.352108471 |
| 2885 | 3.799678963  | 4.2452143 | 3.354143641  | 8.906152791  | 8.49912695   | 8.092101108  |
| 2890 | 5.152247113  | 5.6697357 | 4.634758505  | -0.352108471 | -0.352108471 | -0.352108471 |
| 2893 | -0.352108471 | -0.352108 | -0.352108471 | 4.559699198  | 5.320328988  | 3.799069408  |
| 2896 | 8.660133915  | 5.6153209 | 7.137727412  | 10.90964728  | 7.956236881  | 5.002826481  |
| 2897 | 6.03798158   | 6.0736545 | 6.002308672  | 4.522024694  | 5.124543452  | 3.919505936  |
| 2900 | -0.352108471 | -0.352108 | -0.352108471 | 2.159015127  | 4.773032422  | 3.466023774  |
| 2906 | 7.648141331  | 6.1286863 | 6.888413829  | -0.352108471 | -0.352108471 | -0.352108471 |
| 2907 | 6.816905042  | 6.8453896 | 6.788420481  | 8.822644798  | 8.848465207  | 8.79682439   |
| 2908 | -0.352108471 | -0.352108 | -0.352108471 | 5.450191304  | 6.758667632  | 6.104429468  |
| 2912 | -0.352108471 | -0.352108 | -0.352108471 | 3.919505936  | 4.61154998   | 3.227461892  |
| 2914 | 4.722713869  | 6.0203811 | 7.318048314  | -0.352108471 | -0.352108471 | -0.352108471 |
| 2916 | 6.488181269  | 6.435419  | 6.540943519  | 3.918072844  | 3.827651704  | 3.737230565  |
| 2918 | -0.352108471 | -0.352108 | -0.352108471 | 5.203525788  | 3.128869024  | 7.278182552  |
| 2920 | 5.401039968  | 5.3910182 | 5.380996361  | 0.044132154  | 0.440372779  | -0.352108471 |
| 2923 | -0.352108471 | -0.352108 | -0.352108471 | 8.640359129  | 9.661681892  | 7.619036366  |
| 2926 | -0.352108471 | -0.352108 | -0.352108471 | 6.51496239   | 6.532588736  | 6.497336045  |
| 2934 | 7.037798976  | 7.065024  | 7.010573985  | 6.963991695  | 6.978612763  | 6.949370627  |
| 2935 | 8.799373749  | 3.5037975 | 6.151585628  | 6.636273252  | 4.155841674  | 9.116704829  |
| 2936 | 3.515141236  | 3.7437463 | 3.28653617   | 5.239507923  | 6.677210847  | 5.958359385  |
| 2937 | 5.761334869  | 7.3866031 | 6.573968999  | 9.083823607  | 6.846853879  | 4.609884152  |
| 2940 | -0.352108471 | -0.352108 | -0.352108471 | 2.53473567   | 5.421579811  | -0.352108471 |
| 2941 | -0.352108471 | -0.352108 | -0.352108471 | 5.226519665  | 5.169157826  | 5.111795986  |
| 2947 | 6.874586128  | 5.5221145 | 8.227057708  | 6.86293602   | 6.923579896  | 6.802292144  |
| 2950 | 6.504458524  | 9.1449872 | 7.82472285   | 9.046552185  | 8.388315214  | 8.7174337    |
| 2954 | -0.352108471 | -0.352108 | -0.352108471 | 4.277435984  | 5.169157826  | 6.060879667  |
| 2957 | -0.352108471 | -0.352108 | -0.352108471 | 5.369332089  | 5.383503645  | 5.355160532  |
| 2958 | 2.245600013  | 1.4200355 | 3.071164504  | -0.352108471 | -0.352108471 | -0.352108471 |
| 2960 | 7.629150694  | 8.4071532 | 8.018151954  | 5.92702014   | 5.980385646  | 6.033751153  |
| 2962 | -0.352108471 | -0.352108 | -0.352108471 | 7.137751962  | 5.704580295  | 8.570923628  |
| 2963 | 7.554787271  | 6.3802352 | 6.967511245  | 6.17571908   | 6.889164886  | 6.532441983  |
| 2967 | 6.740863465  | 6.8081556 | 6.77450951   | 5.902534088  | 7.681646284  | 4.123421891  |

|      |              |           |              |              |              |              |
|------|--------------|-----------|--------------|--------------|--------------|--------------|
| 2968 | 8.180299067  | 4.0627585 | 6.121528769  | -0.352108471 | -0.352108471 | -0.352108471 |
| 2975 | 6.559509134  | 6.1054242 | 6.332466669  | 2.169424975  | 2.189845889  | 2.149004061  |
| 2976 | 7.086251434  | 6.4142581 | 5.742264837  | -0.352108471 | -0.352108471 | -0.352108471 |
| 2977 | 1.860062114  | 6.0384535 | 10.21684491  | -0.352108471 | -0.352108471 | -0.352108471 |
| 2979 | 6.704982178  | 6.3950667 | 7.014897631  | 4.468360629  | 4.023270159  | 3.578179689  |
| 2982 | 4.570230597  | 5.9194595 | 7.26868849   | -0.352108471 | -0.352108471 | -0.352108471 |
| 2987 | 3.127737875  | 4.0340787 | 2.221397017  | 2.970676224  | 5.855547981  | 8.740419737  |
| 2992 | -0.352108471 | -0.352108 | -0.352108471 | 7.990281747  | 6.325133473  | 7.15770761   |
| 2994 | -0.352108471 | -0.352108 | -0.352108471 | 3.179776966  | 4.482692559  | 1.876861374  |
| 2995 | -0.352108471 | -0.352108 | -0.352108471 | 6.253719412  | 7.960325437  | 7.107022425  |
| 2997 | 6.212536209  | 3.5856415 | 8.839430905  | 9.121602218  | 5.169157826  | 1.216713433  |
| 3000 | -0.352108471 | -0.352108 | -0.352108471 | 1.167362396  | 2.686833264  | -0.352108471 |
| 3005 | -0.352108471 | -0.352108 | -0.352108471 | 7.643140836  | 9.323743688  | 5.962537983  |
| 3009 | -0.352108471 | -0.352108 | -0.352108471 | 6.66034956   | 6.533166071  | 6.596757815  |
| 3014 | 5.872206726  | 6.8107911 | 6.341498931  | 6.434828619  | 6.975186513  | 7.515544407  |
| 3015 | 7.04152946   | 4.9992327 | 6.020381091  | 7.329808415  | 7.755210593  | 8.18061277   |
| 3021 | 6.450302837  | 6.479333  | 6.421272681  | 8.964795166  | 8.966783408  | 8.962806924  |
| 3026 | 5.777690558  | 6.5194696 | 5.035911528  | -0.352108471 | -0.352108471 | -0.352108471 |
| 3028 | -0.352108471 | -0.352108 | -0.352108471 | 6.081561369  | 5.665786693  | 6.497336045  |
| 3030 | 7.0532029    | 7.5583968 | 8.063590761  | 6.713118177  | 6.099448998  | 6.406283588  |
| 3032 | -0.352108471 | -0.352108 | -0.352108471 | 6.069050974  | 6.056053999  | 6.043057024  |
| 3035 | 7.398193617  | 5.1562159 | 9.640171295  | 7.988337951  | 11.20456133  | 4.772114574  |
| 3046 | -0.352108471 | -0.352108 | -0.352108471 | -0.162668421 | 4.456886199  | 9.07644082   |
| 3052 | -0.352108471 | -0.352108 | -0.352108471 | 0.762376451  | -0.352108471 | 1.876861374  |
| 3054 | 3.131295231  | 3.5151412 | 3.898987241  | 6.964397514  | 6.822208827  | 6.680020139  |
| 3059 | -0.352108471 | -0.352108 | -0.352108471 | 1.601336827  | -0.352108471 | 3.554782125  |
| 3064 | 4.191276601  | 8.7513476 | 6.471312114  | 5.468559522  | 6.588254064  | 7.707948605  |
| 3065 | 3.769410859  | 2.5886014 | 1.407792036  | 5.637296679  | 7.178359369  | 4.096233989  |
| 3066 | 6.824063418  | 6.925707  | 6.874885195  | 6.933400364  | 7.830042649  | 8.726684934  |
| 3068 | 6.518241051  | 6.5884653 | 6.448016836  | 8.69099188   | 8.713854436  | 8.668129324  |
| 3069 | 9.55986917   | 9.8950497 | 9.727459417  | 9.355101689  | 10.00489536  | 9.679998524  |
| 3070 | 3.397489732  | 5.8529375 | 8.308385191  | -0.352108471 | -0.352108471 | -0.352108471 |
| 3071 | 5.085628549  | 6.5527505 | 8.019872406  | -0.352108471 | -0.352108471 | -0.352108471 |
| 3074 | 4.432439699  | 3.9253602 | 4.178899946  | 6.316062741  | 6.611287089  | 6.463674915  |
| 3081 | 3.230907932  | 7.4784634 | 5.354685649  | -0.352108471 | -0.352108471 | -0.352108471 |
| 3090 | 5.354685649  | 5.0792369 | 5.630134363  | 5.723485516  | 4.098167687  | 7.348803344  |
| 3091 | -0.352108471 | -0.352108 | -0.352108471 | 6.56915909   | 6.588465267  | 6.549852913  |
| 3092 | 8.263002114  | 10.233446 | 6.292558225  | 7.466249602  | 8.144006598  | 6.788492606  |
| 3093 | 5.980334028  | 6.7848199 | 5.175848156  | 2.000013094  | 1.539678786  | 1.76984594   |
| 3094 | 5.248304154  | 4.7370778 | 5.759530534  | 6.860600843  | 7.885729184  | 5.835472501  |
| 3096 | 5.089412202  | 5.1245435 | 5.054280952  | -0.352108471 | -0.352108471 | -0.352108471 |
| 3097 | 5.428393874  | 5.3044408 | 5.552346937  | 5.821410838  | 3.939369404  | 7.703452271  |
| 3098 | 5.939192221  | 6.6138618 | 5.264522679  | 7.519935728  | 7.650335294  | 7.78073486   |
| 3099 | -0.352108471 | -0.352108 | -0.352108471 | 5.095423988  | 1.012541458  | 9.178306518  |
| 3105 | 10.18815237  | 9.0930446 | 7.997936849  | 6.566707377  | 8.252720256  | 9.938733134  |
| 3106 | 8.409350362  | 8.1658357 | 8.287593055  | 8.406349062  | 9.56624669   | 8.986297876  |
| 3107 | 7.138699673  | 11.417092 | 9.2778957    | 9.198296144  | 9.076660162  | 9.319932127  |



|      |              |           |              |              |              |              |
|------|--------------|-----------|--------------|--------------|--------------|--------------|
| 3110 | 4.836905519  | 5.1973674 | 5.017136436  | 2.024343053  | 2.051108653  | 1.997577452  |
| 3133 | 6.733587763  | 6.9848468 | 6.859217306  | 8.469855985  | 6.867407982  | 7.668631984  |
| 3139 | 6.565700169  | 4.6396027 | 8.491797642  | 6.01736765   | 7.991002022  | 4.043733279  |
| 3140 | 3.618320908  | 6.2298631 | 8.841405283  | 8.030651509  | 5.687783102  | 6.859217306  |
| 3142 | 7.148954265  | 4.7610343 | 9.536874197  | 0.939116071  | 0.440372779  | 1.437859363  |
| 3145 | -0.352108471 | -0.352108 | -0.352108471 | 6.621237034  | 5.596916991  | 4.572596948  |
| 3146 | 7.820604505  | 7.9270228 | 7.714186196  | 8.833787387  | 8.877971188  | 8.789603586  |
| 3148 | -0.352108471 | -0.352108 | -0.352108471 | 4.707367729  | 4.80208491   | 4.896802091  |
| 3149 | 7.137727412  | 7.0059725 | 7.269482318  | 2.38621749   | 5.124543452  | -0.352108471 |
| 3150 | -0.352108471 | -0.352108 | -0.352108471 | 8.618240121  | 7.682800044  | 6.747359966  |
| 3151 | 7.169692427  | 7.4699623 | 6.869422526  | 10.14601793  | 9.25501272   | 9.700515327  |
| 3155 | -0.352108471 | -0.352108 | -0.352108471 | 2.039485684  | -0.352108471 | 4.43107984   |
| 3159 | 11.67670098  | 7.2621473 | 9.469424158  | 8.737015381  | 9.760419768  | 10.78382416  |
| 3162 | -0.352108471 | -0.352108 | -0.352108471 | 6.715300913  | 5.903760504  | 5.092220095  |
| 3163 | -0.352108471 | -0.352108 | -0.352108471 | 6.694172847  | 9.35003797   | 4.038307724  |
| 3164 | 7.858118037  | 6.9747915 | 8.741444619  | 8.19498699   | 5.428920818  | 6.811953904  |
| 3166 | 6.934539402  | 7.7334712 | 7.334005289  | -0.352108471 | -0.352108471 | -0.352108471 |
| 3172 | 6.189072191  | 7.6640454 | 6.926558783  | -0.352108471 | -0.352108471 | -0.352108471 |
| 3177 | -0.352108471 | -0.352108 | -0.352108471 | 2.113278123  | 5.725733748  | 3.919505936  |
| 3178 | 6.04989125   | 4.7874689 | 7.312313562  | 8.080096592  | 7.3967979    | 6.713499208  |
| 3181 | 8.299575662  | 7.4549104 | 9.144240941  | 9.321384939  | 6.376298356  | 7.848841648  |
| 3182 | 5.723896253  | 6.3324667 | 6.941037084  | 7.510209198  | 7.289109828  | 7.068010458  |
| 3183 | 4.151787417  | 5.386757  | 6.621726484  | 7.46337882   | 6.312126346  | 8.614631294  |
| 3184 | 6.167582836  | 6.3999574 | 5.935208281  | 7.19609887   | 8.000813021  | 6.39138472   |
| 3185 | -0.352108471 | -0.352108 | -0.352108471 | 6.488107881  | 6.515031054  | 6.461184708  |
| 3187 | -0.352108471 | -0.352108 | -0.352108471 | 7.096295931  | 6.767576823  | 6.931936377  |
| 3189 | 4.966788347  | 6.2570463 | 7.547304338  | 7.124132745  | 9.118283565  | 5.129981925  |
| 3190 | 8.42339261   | 7.814447  | 8.118919828  | 9.433720827  | 8.121209203  | 8.777465015  |
| 3191 | 3.245235305  | 3.136327  | 3.354143641  | 8.193053453  | 8.207404259  | 8.178702646  |
| 3192 | 6.369156591  | 7.5066108 | 5.231702339  | 7.016084732  | 8.308388617  | 5.723780847  |
| 3207 | 10.9103478   | 7.7509518 | 4.591555851  | 6.32531018   | 7.173685907  | 5.476934454  |
| 3213 | -0.352108471 | -0.352108 | -0.352108471 | 6.039651413  | 5.842349393  | 6.236953434  |
| 3219 | 7.047306935  | 4.8750268 | 5.961166865  | -0.352108471 | -0.352108471 | -0.352108471 |
| 3235 | -0.352108471 | -0.352108 | -0.352108471 | 6.926938623  | 5.355431001  | 8.498446244  |
| 3237 | 5.939192221  | 5.9583594 | 5.920025058  | 7.082757193  | 7.100490419  | 7.065023967  |
| 3241 | -0.352108471 | -0.352108 | -0.352108471 | 7.990538841  | 6.463674915  | 4.936810989  |
| 3251 | -0.352108471 | -0.352108 | -0.352108471 | 6.524802878  | 6.40631083   | 6.287818783  |
| 3257 | 6.319191314  | 5.840966  | 5.362740716  | -0.352108471 | -0.352108471 | -0.352108471 |
| 3265 | 1.911668176  | 4.8786655 | 7.845662781  | -0.352108471 | -0.352108471 | -0.352108471 |
| 3267 | -0.352108471 | -0.352108 | -0.352108471 | 2.024343053  | 2.051108653  | 1.997577452  |
| 3269 | 6.133336141  | 5.489617  | 6.77705526   | 0.044132154  | -0.352108471 | 0.440372779  |
| 3275 | 6.332466669  | 6.3439771 | 6.320956231  | 6.997455924  | 7.016299086  | 6.978612763  |
| 3276 | 6.53740366   | 8.6768585 | 7.607131056  | 9.928760285  | 8.242258058  | 6.555755831  |
| 3281 | 7.02332832   | 5.8749598 | 8.171696872  | 6.550537182  | 5.561570816  | 6.056053999  |
| 3284 | 7.052990603  | 7.1550161 | 6.950965134  | -0.352108471 | -0.352108471 | -0.352108471 |
| 3292 | 2.681724436  | 5.7155573 | -0.352108471 | -0.352108471 | -0.352108471 | -0.352108471 |
| 3297 | 4.14713782   | 7.4532618 | 5.800199788  | 5.016504084  | 6.94160582   | 8.866707556  |



|      |              |           |              |              |              |              |
|------|--------------|-----------|--------------|--------------|--------------|--------------|
| 3300 | 6.862147155  | 5.7447753 | 6.303461245  | 4.780711618  | 4.539403762  | 4.66005769   |
| 3301 | 5.524840227  | 4.5094326 | 5.017136436  | 7.284043907  | 6.64213435   | 6.000224793  |
| 3304 | 4.447190182  | 4.351251  | 4.543129357  | 0.395051519  | 1.14221151   | -0.352108471 |
| 3306 | -0.352108471 | -0.352108 | -0.352108471 | 5.858942671  | 7.107022425  | 8.355102178  |
| 3308 | 8.2833161    | 5.4387989 | 6.861057494  | 8.062353202  | 8.234604437  | 7.890101968  |
| 3309 | 8.706352031  | 5.6716473 | 11.74105675  | 9.865498692  | 9.083899944  | 8.302301195  |
| 3312 | 11.72664061  | 9.387224  | 7.047807296  | 10.53344541  | 10.34988851  | 10.16633162  |
| 3313 | 8.683688676  | 6.8018138 | 4.919938871  | 7.76697743   | 6.694172847  | 5.621368264  |
| 3315 | 11.60415388  | 6.6105304 | 9.107342156  | 10.28284962  | 11.5424811   | 9.023218138  |
| 3316 | 4.578859472  | 5.4361909 | 6.293522372  | -0.352108471 | -0.352108471 | -0.352108471 |
| 3320 | 10.15391215  | 7.8078346 | 8.980873376  | 7.382056394  | 11.02742677  | 9.204741582  |
| 3326 | 10.29613331  | 8.8964382 | 7.496743117  | 10.37436414  | 9.158476009  | 7.942587883  |
| 3329 | 8.028411128  | 7.1073931 | 8.949429178  | 8.090886677  | 6.469218275  | 9.712555079  |
| 3337 | 5.180894808  | 5.4937832 | 5.806671621  | 1.223721097  | 0.85959438   | 1.587847814  |
| 3338 | -0.352108471 | -0.352108 | -0.352108471 | 5.613451577  | 5.105495698  | 6.121407457  |
| 3339 | 8.873924453  | 8.9717102 | 8.92281734   | 6.243235173  | 6.038453511  | 6.448016836  |
| 3340 | -0.352108471 | -0.352108 | -0.352108471 | 8.159795512  | 8.426283728  | 8.29303962   |
| 3351 | -0.352108471 | -0.352108 | -0.352108471 | 5.284974356  | 4.959233174  | 5.610715538  |
| 3358 | -0.352108471 | -0.352108 | -0.352108471 | 4.896613476  | 5.017136436  | 5.137659395  |
| 3364 | 4.522028939  | 6.3780695 | 8.234110053  | 3.590023696  | 3.250862253  | 3.420442975  |
| 3371 | -0.352108471 | -0.352108 | -0.352108471 | 6.056053999  | 4.912659641  | 7.199448357  |
| 3375 | 5.11101762   | 7.3333471 | 9.555676624  | 6.096590115  | 5.457998494  | 4.819406872  |
| 3376 | 4.647646069  | 5.5913056 | 6.534965108  | -0.352108471 | -0.352108471 | -0.352108471 |
| 3383 | 7.263919002  | 5.6366867 | 6.450302837  | 7.287375453  | 8.053131241  | 6.521619664  |
| 3386 | -0.352108471 | -0.352108 | -0.352108471 | 1.783698732  | -0.352108471 | 3.919505936  |
| 3397 | 8.304467859  | 4.4892689 | 6.396868383  | 7.646004538  | 8.703955454  | 6.588053622  |
| 3398 | -0.352108471 | -0.352108 | -0.352108471 | 3.919505936  | 5.733955955  | 2.105055916  |
| 3399 | -0.352108471 | -0.352108 | -0.352108471 | 8.318625916  | 9.196310188  | 7.440941643  |
| 3400 | 1.957606802  | 5.8288485 | 9.700090126  | -0.352108471 | -0.352108471 | -0.352108471 |
| 3416 | 6.462091294  | 7.0978125 | 7.733533766  | 1.689109503  | 1.731739118  | 1.646479888  |
| 3417 | -0.352108471 | -0.352108 | -0.352108471 | 4.727148895  | 5.095423988  | 5.46369908   |
| 3419 | 5.625160771  | 6.5311342 | 4.719187355  | 6.868554262  | 3.16571861   | 5.017136436  |
| 3420 | -0.352108471 | -0.352108 | -0.352108471 | 6.18047806   | 5.823140203  | 6.001809131  |
| 3421 | 4.727729798  | 4.9735278 | 5.219325861  | 0.647185709  | -0.352108471 | 1.646479888  |
| 3423 | 4.259723664  | 3.6761388 | 4.843308497  | 5.20089139   | 5.254689875  | 5.147092904  |
| 3428 | -0.352108471 | -0.352108 | -0.352108471 | 6.668125644  | 7.478462511  | 8.288799378  |
| 3431 | -0.352108471 | -0.352108 | -0.352108471 | 3.947987959  | 4.016045771  | 4.084103583  |
| 3433 | -0.352108471 | -0.352108 | -0.352108471 | 7.773518037  | 5.256406744  | 6.51496239   |
| 3434 | 6.020656397  | 5.873346  | 6.167966808  | 6.887680082  | 7.016299086  | 6.759061079  |
| 3437 | 6.522675414  | 6.1999612 | 6.845389604  | 7.377124155  | 7.49196897   | 7.26227934   |
| 3454 | 6.033774876  | 6.7943232 | 5.273226589  | 0.975533543  | 0.808855576  | 1.14221151   |
| 3455 | 6.054330535  | 3.0800634 | 4.567196948  | 8.408296827  | 3.613362653  | 6.01082974   |
| 3459 | 6.627660242  | 5.6641722 | 4.700684121  | -0.352108471 | -0.352108471 | -0.352108471 |
| 3460 | -0.352108471 | -0.352108 | -0.352108471 | 3.235346083  | 6.539179568  | 4.887262826  |
| 3476 | 5.980334028  | 4.8002135 | 7.160454534  | 4.403284405  | 7.315950333  | 5.859617369  |
| 3479 | 6.826861542  | 5.8876701 | 7.766052954  | 6.761447227  | 6.368679046  | 7.154215408  |
| 3480 | 1.383520155  | 1.9527896 | 0.814250726  | 7.246609587  | 6.549852913  | 5.853096238  |

|      |              |           |              |              |              |              |
|------|--------------|-----------|--------------|--------------|--------------|--------------|
| 3481 | 10.38143988  | 7.2640884 | 8.822764129  | 7.242521962  | 5.834633147  | 8.650410777  |
| 3482 | 4.878665478  | 5.7328621 | 4.024468896  | -0.352108471 | -0.352108471 | -0.352108471 |
| 3486 | 6.093634638  | 7.4538469 | 6.77374078   | 7.696084753  | 7.17040874   | 7.433246747  |
| 3487 | 9.769125527  | 9.7691255 | 9.769125527  | 9.974617326  | 9.979895128  | 9.969339523  |
| 3488 | 11.37003559  | 11.393313 | 11.34675789  | 11.4703594   | 11.4703594   | 11.4703594   |
| 3489 | 4.538693134  | 6.0203811 | 7.502069049  | 9.961621349  | 6.128501857  | 8.045061603  |
| 3490 | 5.791964116  | 7.3053415 | 8.818718842  | 7.873692252  | 11.02837773  | 9.451034992  |
| 3491 | 7.352453156  | 6.7568561 | 7.948050163  | 8.255214198  | 10.74341222  | 9.499313207  |
| 3508 | 2.168105043  | 4.6883186 | -0.352108471 | -0.352108471 | -0.352108471 | -0.352108471 |
| 3516 | 6.965310702  | 6.9129933 | 6.860675988  | 6.038132331  | 5.50822504   | 6.568039622  |
| 3543 | -0.352108471 | -0.352108 | -0.352108471 | 6.333081941  | 6.165870606  | 5.998659271  |
| 3550 | 6.573968999  | 6.5884653 | 6.559472732  | 7.286324647  | 7.29520141   | 7.277447884  |
| 3559 | -0.352108471 | -0.352108 | -0.352108471 | 4.338147062  | 4.254913518  | 4.421380607  |
| 3563 | 5.788942239  | 7.0776952 | 6.433318728  | -0.352108471 | -0.352108471 | -0.352108471 |
| 3566 | 6.732320039  | 7.9356905 | 7.334005289  | 5.325716078  | 4.81834049   | 5.833091666  |
| 3569 | -0.352108471 | -0.352108 | -0.352108471 | 5.412561087  | 5.421579811  | 5.403542364  |
| 3570 | 7.149289854  | 4.2141661 | 5.681727979  | 2.139844176  | -0.352108471 | 4.631796822  |
| 3572 | 4.467791151  | 3.8632301 | 5.07235221   | -0.352108471 | -0.352108471 | -0.352108471 |
| 3576 | 6.77374078   | 6.7884205 | 6.759061079  | 6.12990004   | 6.135204448  | 6.124595632  |
| 3579 | 5.406977617  | 6.4762162 | 5.941596889  | 4.338147062  | 4.245214285  | 4.43107984   |
| 3581 | -0.352108471 | -0.352108 | -0.352108471 | 1.359428583  | 2.686833264  | 4.014237944  |
| 3586 | 7.987762161  | 6.6333311 | 5.278900124  | 3.557621381  | 5.383503645  | 1.731739118  |
| 3588 | 3.731286361  | 7.2430196 | 5.487153005  | 6.126959032  | 6.454671637  | 5.799246428  |
| 3589 | 6.864589285  | 7.7174745 | 7.291031875  | 4.165796877  | 3.119148782  | 5.212444972  |
| 3597 | 1.300156699  | 1.5010176 | 1.70187847   | 5.980977506  | 7.541510824  | 4.420444188  |
| 3603 | 3.995992578  | 5.104623  | 4.550307802  | 3.633572465  | 4.205439406  | 3.919505936  |
| 3604 | 8.167814831  | 7.2973141 | 6.42681341   | 5.555702451  | 5.076733165  | 6.034671738  |
| 3608 | 8.475239738  | 8.0685686 | 8.271904178  | 4.183731754  | 9.960936226  | 7.07233399   |
| 3609 | -0.352108471 | -0.352108 | -0.352108471 | 6.928292805  | 5.876364328  | 7.980221282  |
| 3611 | 8.405115873  | 8.1972472 | 8.612984573  | 8.074733539  | 6.802632252  | 7.438682896  |
| 3614 | 8.914781845  | 7.8721753 | 8.393478561  | 4.416563954  | 6.087644454  | 7.758724955  |
| 3615 | 8.491937437  | 5.5931087 | 7.042523083  | 6.824364836  | 5.789762726  | 4.755160616  |
| 3619 | -0.352108471 | -0.352108 | -0.352108471 | 1.167362396  | -0.352108471 | 2.686833264  |
| 3620 | 8.268610322  | 7.7533828 | 8.783837825  | 7.120198948  | 7.361599114  | 7.60299928   |
| 3622 | 7.144242261  | 5.8001998 | 4.456157314  | -0.352108471 | -0.352108471 | -0.352108471 |
| 3628 | -0.352108471 | -0.352108 | -0.352108471 | 4.80208491   | 4.697388804  | 4.906781016  |
| 3631 | 6.222276466  | 4.2127058 | 5.217491139  | -0.352108471 | -0.352108471 | -0.352108471 |
| 3632 | -0.352108471 | -0.352108 | -0.352108471 | 6.621166613  | 6.64213435   | 6.663102087  |
| 3633 | 5.230583641  | 4.3152356 | 4.772909641  | 5.909921722  | 3.925489738  | 4.91770573   |
| 3636 | 6.606274438  | 7.056304  | 6.831289207  | 8.082188235  | 7.927943305  | 8.236433165  |
| 3638 | -0.352108471 | -0.352108 | -0.352108471 | 6.49953988   | 5.307981128  | 5.903760504  |
| 3646 | 7.913111393  | 6.3370236 | 7.1250675    | 8.250590956  | 10.78631288  | 5.714869029  |
| 3653 | -0.352108471 | -0.352108 | -0.352108471 | 3.919505936  | 2.007020635  | 5.831991237  |
| 3654 | 7.560028859  | 7.6208136 | 7.681598432  | 4.251654614  | 6.56915909   | 8.886663565  |
| 3655 | 8.585414301  | 5.7861177 | 7.185765998  | 6.695525671  | 5.552208885  | 6.123867278  |
| 3656 | 3.279603139  | 5.9572708 | 4.618436987  | 6.083327147  | 7.449808407  | 4.716845887  |
| 3658 | 6.945152381  | 5.2216669 | 3.498181444  | 2.580385912  | 1.608502353  | 2.094444132  |

|      |              |           |              |              |              |              |
|------|--------------|-----------|--------------|--------------|--------------|--------------|
| 3660 | -0.352108471 | -0.352108 | -0.352108471 | 7.402244318  | 6.235921161  | 5.069598004  |
| 3661 | -0.352108471 | -0.352108 | -0.352108471 | 2.856646019  | 4.313596583  | 3.585121301  |
| 3664 | -0.352108471 | -0.352108 | -0.352108471 | 1.783698732  | -0.352108471 | 3.919505936  |
| 3667 | 6.01603981   | 5.3546856 | 4.693331488  | -0.352108471 | -0.352108471 | -0.352108471 |
| 3669 | 6.566104981  | 4.7783493 | 2.990593553  | 0.228373553  | 0.808855576  | -0.352108471 |
| 3672 | -0.352108471 | -0.352108 | -0.352108471 | 7.102575825  | 6.479260377  | 5.855944928  |
| 3673 | 5.101393888  | 5.8108867 | 5.456140284  | 1.346495496  | 0.440372779  | 2.252618212  |
| 3675 | 7.08718283   | 6.8972549 | 7.277110733  | 7.969914828  | 8.331377891  | 7.608451766  |
| 3678 | 7.496938343  | 9.1220351 | 5.871841587  | 8.837967035  | 8.387312717  | 9.288621353  |
| 3681 | -0.352108471 | -0.352108 | -0.352108471 | 1.383520155  | 3.119148782  | -0.352108471 |
| 3684 | -0.343508985 | 2.3862175 | 5.115943966  | -0.352108471 | -0.352108471 | -0.352108471 |
| 3685 | -0.352108471 | -0.352108 | -0.352108471 | 9.568078963  | 6.642035792  | 3.715992621  |
| 3688 | 8.180022589  | 9.4242303 | 8.80212642   | 8.028619009  | 9.297298521  | 10.56597803  |
| 3689 | -0.352108471 | -0.352108 | -0.352108471 | 4.103893054  | 3.685573971  | 4.522212138  |
| 3690 | -0.352108471 | -0.352108 | -0.352108471 | 6.626140968  | 6.921340591  | 6.77374078   |
| 3692 | 5.980548488  | 5.1522471 | 4.323945738  | 5.676254103  | 5.866795484  | 6.057336865  |
| 3693 | 8.995214539  | 9.0587261 | 9.026970344  | 7.364896091  | 6.58635054   | 6.975623316  |
| 3696 | 5.344627021  | 4.9140225 | 5.775231583  | 0.228373553  | 0.808855576  | -0.352108471 |
| 3697 | -0.352108471 | -0.352108 | -0.352108471 | 3.391618073  | 5.766929757  | 8.14224144   |
| 3700 | 4.551834616  | 6.9185331 | 5.735183859  | -0.352108471 | -0.352108471 | -0.352108471 |
| 3703 | 6.63917186   | 5.1512515 | 8.127092204  | 7.939745657  | 7.757808357  | 7.575871057  |
| 3704 | 5.580935913  | 6.9667286 | 6.273832259  | -0.352108471 | -0.352108471 | -0.352108471 |
| 3705 | -0.352108471 | -0.352108 | -0.352108471 | 7.821251062  | 3.728885369  | 5.775068216  |
| 3707 | 8.407213441  | 5.2396395 | 2.072065653  | 5.876852273  | 5.821882502  | 5.849367387  |
| 3709 | -0.352108471 | -0.352108 | -0.352108471 | 0.82273449   | 1.997577452  | -0.352108471 |
| 3712 | 7.068912368  | 9.7690385 | 8.418975411  | 6.883516622  | 8.547225522  | 5.219807721  |
| 3716 | 6.513255867  | 6.502263  | 6.49127019   | 7.95008487   | 6.77374078   | 5.597396689  |
| 3718 | 6.249310771  | 7.5247254 | 8.800140028  | 6.491089529  | 5.316276786  | 4.141464043  |
| 3725 | 8.297586491  | 6.9166756 | 7.607131056  | 3.144232774  | 5.928559279  | 5.036396027  |
| 3726 | 5.730322944  | 5.6469224 | 5.688622647  | 9.773336282  | 4.6963668    | 7.234851541  |
| 3727 | 4.088858322  | 6.1573315 | 8.225804672  | 6.968740112  | 6.79004344   | 6.611346769  |
| 3728 | 4.547838453  | 7.9362581 | 6.242048279  | 7.735600725  | 5.789762726  | 3.843924727  |
| 3732 | 6.328948232  | 8.7335193 | 11.13809044  | 7.584066922  | 7.321623864  | 7.84650998   |
| 3735 | 6.63996159   | 7.9596881 | 5.320235067  | 8.267005347  | 7.870064962  | 7.473124576  |
| 3737 | -0.352108471 | -0.352108 | -0.352108471 | 4.854565569  | 5.233567424  | 5.612569278  |
| 3739 | 5.852937462  | 4.4486745 | 7.25720046   | 5.052267685  | 4.31970398   | 5.784831391  |
| 3743 | 6.434082627  | 6.310617  | 6.187151276  | 5.584753022  | 5.575450847  | 5.580101935  |
| 3746 | 5.852937462  | 5.6151608 | 6.090714133  | 5.854112884  | 4.001245546  | 4.927679215  |
| 3747 | 5.493783215  | 5.5293114 | 5.458255064  | -0.352108471 | -0.352108471 | -0.352108471 |
| 3751 | -0.352108471 | -0.352108 | -0.352108471 | 6.776333085  | 5.267768765  | 6.022050925  |
| 3753 | 4.325367023  | 0.9842125 | 2.65478974   | -0.352108471 | -0.352108471 | -0.352108471 |
| 3755 | -0.352108471 | -0.352108 | -0.352108471 | 5.998406448  | 6.038453511  | 5.958359385  |
| 3756 | -0.352108471 | -0.352108 | -0.352108471 | 6.082827961  | 6.235921161  | 6.38901436   |
| 3762 | 7.182045243  | 5.667464  | 6.424754644  | 6.096442209  | 5.342163113  | 6.850721306  |
| 3764 | -0.352108471 | -0.352108 | -0.352108471 | 6.563015794  | 6.42520231   | 6.287388827  |
| 3767 | 7.56332667   | 5.6848521 | 9.441801235  | 8.259212257  | 7.144544239  | 7.701878248  |
| 3768 | -0.352108471 | -0.352108 | -0.352108471 | 2.737063236  | 2.972932224  | 2.85499773   |

|      |              |           |              |              |              |              |
|------|--------------|-----------|--------------|--------------|--------------|--------------|
| 3772 | 7.084436832  | 5.6118503 | 4.139263845  | 8.203354599  | 4.66005769   | 1.116760781  |
| 3779 | -0.352108471 | -0.352108 | -0.352108471 | 2.318472185  | 4.995200701  | 7.671929216  |
| 3780 | 4.439664466  | 5.9002924 | 7.360920295  | -0.352108471 | -0.352108471 | -0.352108471 |
| 3781 | 6.767634029  | 6.1488914 | 7.386376647  | 0.624614178  | 0.808855576  | 0.440372779  |
| 3782 | 5.016452245  | 6.7334942 | 5.874973212  | 3.607797978  | 4.832674249  | 6.05755052   |
| 3785 | 5.749402114  | 5.7752316 | 5.723572646  | -0.352108471 | -0.352108471 | -0.352108471 |
| 3787 | -0.352108471 | -0.352108 | -0.352108471 | 6.203778275  | 6.532441983  | 6.861105692  |
| 3790 | 7.001877779  | 4.0165856 | 1.031293462  | 3.97076157   | 3.442033616  | 4.499489523  |
| 3799 | 6.432986623  | 6.460395  | 6.446690805  | 6.165870606  | 7.405827811  | 4.925913401  |
| 3800 | -0.352108471 | -0.352108 | -0.352108471 | 3.119148782  | 3.119148782  | 3.119148782  |
| 3801 | 2.523212107  | -0.352108 | 5.398532684  | -0.352108471 | -0.352108471 | -0.352108471 |
| 3814 | 5.688622647  | 3.8858946 | 7.491350666  | -0.352108471 | -0.352108471 | -0.352108471 |
| 3824 | 9.182196949  | 9.0010772 | 8.819957546  | 5.84130581   | 8.394109443  | 10.94691308  |
| 3831 | 6.816905042  | 6.8453896 | 6.788420481  | -0.352108471 | -0.352108471 | -0.352108471 |
| 3832 | 4.495193957  | 5.873109  | 5.184151491  | -0.352108471 | -0.352108471 | -0.352108471 |
| 3835 | -0.352108471 | -0.352108 | -0.352108471 | 7.036396027  | 8.563977859  | 5.508814194  |
| 3836 | 7.826335252  | 6.271725  | 4.71711465   | 6.127905908  | 4.210409743  | 5.169157826  |
| 3837 | 3.440713359  | 5.6251608 | 7.809608183  | 8.154949327  | 8.960221794  | 7.349676859  |
| 3838 | 5.117115863  | 6.7355364 | 3.498695293  | 7.58484956   | 8.875763014  | 8.230306287  |
| 3839 | 7.558396831  | 7.5821735 | 7.534620179  | 6.479260377  | 6.497336045  | 6.461184708  |
| 3840 | 6.48210131   | 6.2873111 | 6.676891516  | 6.976556933  | 7.083361287  | 7.190165642  |
| 3842 | -0.352108471 | -0.352108 | -0.352108471 | 7.076142219  | 8.363812961  | 5.788471477  |
| 3843 | 4.016045771  | 4.1125856 | 3.919505936  | 6.497182024  | 6.515031054  | 6.479332994  |
| 3845 | 7.305341479  | 7.2952014 | 7.315481548  | 0.289051906  | -0.352108471 | -0.352108471 |
| 3852 | 6.888413829  | 6.33832   | 7.43850766   | -0.352108471 | -0.352108471 | -0.352108471 |
| 3855 | -0.352108471 | -0.352108 | -0.352108471 | 5.760537073  | 5.775231583  | 5.745842563  |
| 3856 | 5.365098992  | 7.5180702 | 9.671041483  | 4.306712954  | 5.964923401  | 5.135818178  |
| 3858 | 7.251757684  | 6.6926949 | 7.810820492  | 3.181382067  | 6.12990004   | 9.078418014  |
| 3872 | -0.352108471 | -0.352108 | -0.352108471 | 7.61641127   | 6.974182621  | 6.331953972  |
| 3875 | 8.85222252   | 11.257529 | 10.05487561  | 10.8062472   | 11.29508467  | 11.05066594  |
| 3880 | 6.926801914  | 5.7288033 | 8.124800574  | 8.347659397  | 7.760249447  | 8.935069348  |
| 3885 | 4.467400096  | 7.1287169 | 5.798058523  | -0.352108471 | -0.352108471 | -0.352108471 |
| 3888 | -0.352108471 | -0.352108 | -0.352108471 | 0.95025487   | 2.252618212  | -0.352108471 |
| 3891 | 5.284974356  | 5.3152588 | 5.254689875  | -0.352108471 | -0.352108471 | -0.352108471 |
| 3892 | -0.352108471 | -0.352108 | -0.352108471 | 3.055081529  | 1.997577452  | 4.112585606  |
| 3895 | -0.352108471 | -0.352108 | -0.352108471 | 8.636495497  | 6.165870606  | 3.695245715  |
| 3897 | 9.425513967  | 8.4327945 | 7.440075038  | 11.35465127  | 7.850143435  | 4.345635597  |
| 3899 | 5.842203299  | 6.2858739 | 5.398532684  | 1.80041638   | 1.549724107  | 2.051108653  |
| 3908 | 5.872552224  | 5.7740431 | 5.675534056  | -0.352108471 | -0.352108471 | -0.352108471 |
| 3909 | -0.352108471 | -0.352108 | -0.352108471 | 4.846372443  | 5.233567424  | 5.620762404  |
| 3910 | -0.352108471 | -0.352108 | -0.352108471 | 6.070043966  | 10.87256036  | 1.267527571  |
| 3911 | 3.960558219  | 1.9155521 | 2.93805515   | 4.529750072  | 9.258195391  | 6.893972732  |
| 3912 | 7.707304336  | 6.6926473 | 8.72196135   | 4.139098863  | 8.069760072  | 6.104429468  |
| 3913 | 2.57391305   | 3.1277379 | 3.6815627    | 7.038110141  | 5.64354012   | 4.248970098  |
| 3915 | 5.217491139  | 7.7503844 | 2.684597874  | 11.34253253  | 8.431766751  | 5.521000967  |
| 3916 | 8.36756994   | 7.1247807 | 5.881991373  | 8.467825184  | 8.544815697  | 8.50632044   |
| 3918 | 7.496938343  | 3.3652828 | 11.62859393  | -0.352108471 | -0.352108471 | -0.352108471 |

|      |              |           |              |              |              |              |
|------|--------------|-----------|--------------|--------------|--------------|--------------|
| 3920 | -0.352108471 | -0.352108 | -0.352108471 | 6.963991695  | 4.6706451    | 9.25733829   |
| 3921 | 9.531944399  | 8.6490629 | 7.766181457  | 9.768473371  | 8.784980401  | 7.80148743   |
| 3925 | 9.397123932  | 8.4724392 | 7.547754523  | 10.39264277  | 6.841594069  | 8.617118418  |
| 3927 | -0.352108471 | -0.352108 | -0.352108471 | 10.05262939  | 8.293891694  | 11.81136709  |
| 3938 | -0.352108471 | -0.352108 | -0.352108471 | 5.998006297  | 4.714938642  | 5.35647247   |
| 3939 | 7.581479685  | 8.8021264 | 10.02277316  | 8.352984769  | 9.617951574  | 8.985468172  |
| 3945 | 0.707782115  | 2.0592582 | 1.383520155  | 8.594346013  | 7.019905662  | 10.16878636  |
| 3949 | 6.867257122  | 7.9831209 | 9.098984622  | 7.458575985  | 7.361907759  | 7.555244212  |
| 3954 | 7.663788002  | 5.302228  | 10.02534803  | 5.736129999  | 8.209613071  | 6.972871535  |
| 3956 | 12.27501683  | 10.465054 | 11.37003559  | 11.24997576  | 12.49803511  | 11.87400544  |
| 3958 | 7.286324647  | 6.6546637 | 7.917985573  | 6.968247266  | 8.10209829   | 9.235949314  |
| 3959 | -0.352108471 | -0.352108 | -0.352108471 | 5.660467942  | 8.620162393  | 11.57985684  |
| 3977 | 5.237057889  | 4.797215  | 5.017136436  | 0.727922146  | -0.352108471 | 1.807952763  |
| 3984 | 5.555775398  | 5.431791  | 5.493783215  | 10.61545944  | 7.228052884  | 3.840646324  |
| 3985 | -0.352108471 | -0.352108 | -0.352108471 | 7.011395162  | 6.397419316  | 7.625371009  |
| 3987 | 4.233062215  | 5.7732919 | 7.313521544  | 7.171914945  | 7.832164458  | 6.511665431  |
| 3988 | -0.352108471 | -0.352108 | -0.352108471 | 6.177737104  | 6.073654487  | 5.96957187   |
| 3992 | 3.968518528  | 4.2452143 | 3.69182277   | 4.74995208   | 4.245214285  | 5.254689875  |
| 3995 | 5.038624768  | 8.0361427 | 6.537383725  | 7.823028303  | 11.72108795  | 3.92496866   |
| 3996 | 7.833575671  | 5.8217259 | 6.827650764  | 7.425308672  | 3.638556     | 5.531932336  |
| 3998 | 2.822482428  | 3.1277379 | 3.432993323  | 9.09247134   | 5.604915118  | 7.348693229  |
| 4000 | 10.13413309  | 9.9700978 | 9.806062582  | 11.05393327  | 9.940058875  | 8.826184485  |
| 4001 | 7.456695988  | 5.691242  | 6.573968999  | 7.254608919  | 8.789493163  | 5.719724675  |
| 4007 | 4.502620332  | 6.477905  | 5.490262688  | 7.254069128  | 6.53365233   | 5.813235532  |
| 4008 | 6.973027794  | 6.2738323 | 5.574636724  | 6.064870333  | 6.77374078   | 7.482611227  |
| 4010 | 8.162836383  | 6.1042316 | 7.133534001  | 5.411522783  | 3.619336938  | 4.515429861  |
| 4015 | 3.572896292  | 3.5151412 | 3.45738618   | 6.854700456  | 7.664522813  | 8.47434517   |
| 4016 | 8.641099725  | 6.5068324 | 7.573966062  | 8.045061603  | 7.263433807  | 8.826689399  |
| 4017 | 10.19901888  | 10.495687 | 9.902350535  | 7.536609177  | 12.42223228  | 9.979420727  |
| 4025 | -0.352108471 | -0.352108 | -0.352108471 | 1.727886404  | 2.274515706  | 2.821145009  |
| 4026 | 11.19040017  | 12.933061 | 9.4477389    | 11.1618143   | 9.585681629  | 10.37374796  |
| 4034 | 3.127737875  | 3.136327  | 3.119148782  | 6.235921161  | 6.246629235  | 6.225213087  |
| 4035 | 10.06040302  | 8.4502373 | 6.840071666  | 8.746539559  | 8.536492451  | 8.326445344  |
| 4037 | -0.352108471 | -0.352108 | -0.352108471 | 5.054442098  | 5.219901144  | 5.385360191  |
| 4038 | -0.352108471 | -0.352108 | -0.352108471 | -0.314714384 | 1.601336827  | 3.517388038  |
| 4041 | 5.207939981  | 6.6041161 | 8.000292236  | -0.352108471 | -0.352108471 | -0.352108471 |
| 4043 | 10.8460926   | 8.9595972 | 7.073101865  | 7.437584324  | 7.263191781  | 7.611976866  |
| 4046 | -0.352108471 | -0.352108 | -0.352108471 | 1.167362396  | 2.686833264  | -0.352108471 |
| 4052 | -0.352108471 | -0.352108 | -0.352108471 | 3.712046455  | 5.529311366  | 7.346576277  |
| 4053 | 8.651772321  | 7.2997821 | 10.00376259  | 7.039742186  | 7.800060623  | 8.560379059  |
| 4054 | -0.352108471 | -0.352108 | -0.352108471 | 3.059495471  | 6.164526205  | 9.26955694   |
| 4055 | -0.352108471 | -0.352108 | -0.352108471 | 7.664251461  | 7.074360223  | 7.369305842  |
| 4059 | 6.107538801  | 6.1414231 | 6.073654487  | -0.352108471 | -0.352108471 | -0.352108471 |
| 4060 | 6.913488898  | 6.9268019 | 6.900175883  | 6.804723141  | 6.821025802  | 6.788420481  |
| 4061 | 8.84323225   | 9.0709978 | 9.298763302  | 8.191745815  | 9.763364839  | 8.977555327  |
| 4063 | 6.273832259  | 6.2858739 | 6.261790604  | -0.352108471 | -0.352108471 | -0.352108471 |
| 4065 | 6.777273875  | 6.1573315 | 5.537389119  | 1.918895351  | 2.191310813  | 1.646479888  |

|      |              |           |              |              |              |              |
|------|--------------|-----------|--------------|--------------|--------------|--------------|
| 4068 | -0.352108471 | -0.352108 | -0.352108471 | 5.559486597  | 3.354285802  | 4.456886199  |
| 4069 | 8.293998691  | 9.2339241 | 7.354073309  | 6.589560041  | 7.254608919  | 7.919657797  |
| 4070 | 7.139400565  | 5.8529375 | 4.566474358  | 5.915686299  | 5.358907059  | 5.637296679  |
| 4071 | 5.260869153  | 8.0873886 | 6.674128879  | -0.352108471 | -0.352108471 | -0.352108471 |
| 4074 | -0.352108471 | -0.352108 | -0.352108471 | 6.704640042  | 5.412561087  | 4.120482133  |
| 4076 | 5.217491139  | 5.2437595 | 5.191222747  | 7.406278031  | 7.426473409  | 7.386082653  |
| 4077 | -0.352108471 | -0.352108 | -0.352108471 | 9.197240908  | 7.081969575  | 8.139605241  |
| 4082 | 6.349474962  | 8.1407346 | 9.931994292  | 8.013807728  | 7.595907574  | 8.431707882  |
| 4084 | 6.014212707  | 6.9903133 | 6.502263028  | -0.352108471 | -0.352108471 | -0.352108471 |
| 4086 | 6.450302837  | 6.479333  | 6.421272681  | -0.352108471 | -0.352108471 | -0.352108471 |
| 4087 | -0.352108471 | -0.352108 | -0.352108471 | 5.789762726  | 5.962507942  | 5.61701751   |
| 4088 | 5.152247113  | 4.6635375 | 5.640956761  | -0.352108471 | -0.352108471 | -0.352108471 |
| 4089 | 7.053389612  | 8.6217478 | 5.48503145   | 6.22033882   | 5.877610884  | 6.563066757  |
| 4090 | 6.378374162  | 8.3199169 | 4.43683139   | 3.468339107  | 1.02644692   | 2.247393013  |
| 4093 | -1.133968888 | 5.0270747 | 1.946552907  | 0.260099797  | 5.93862089   | 3.099360343  |
| 4097 | 4.272762536  | 4.5503078 | 4.827853067  | 3.195005998  | 3.296245714  | 3.245625856  |
| 4109 | 5.930987544  | 5.0469866 | 4.16298569   | 0.473647518  | 2.151863433  | 3.830079347  |
| 4111 | -0.352108471 | -0.352108 | -0.352108471 | 5.355233019  | 5.886291167  | 5.620762093  |
| 4117 | 3.661203108  | 4.6189807 | 5.576758283  | 1.036211897  | 1.14221151   | 0.930212283  |
| 4122 | 5.417023759  | 6.2343267 | 4.599720773  | 6.429516632  | 7.943505759  | 7.186511196  |
| 4123 | 3.615867194  | 4.1125856 | 3.119148782  | 6.43509637   | 6.355161685  | 6.515031054  |
| 4124 | 5.452350409  | 6.5905083 | 7.728666198  | 8.073536386  | 7.019487643  | 5.965438899  |
| 4125 | 6.08682898   | 5.252355  | 6.921302913  | 7.534087958  | 4.426580098  | 5.980334028  |
| 4128 | 6.939871798  | 4.8338042 | 9.045939352  | -0.352108471 | -0.352108471 | -0.352108471 |
| 4130 | 6.967852188  | 5.7984508 | 6.383151496  | 6.087644454  | 7.227060847  | 4.948228062  |
| 4133 | 6.861057494  | 6.8767254 | 6.845389604  | 6.165870606  | 6.174080069  | 6.157661143  |
| 4134 | 3.596683414  | 7.1126879 | 5.354685649  | 6.191098526  | 6.087644454  | 5.984190383  |
| 4140 | 6.303461245  | 6.9301486 | 5.676773855  | 9.006625686  | 6.804723141  | 4.602820596  |
| 4141 | 6.308663192  | 6.1754334 | 6.242048279  | 7.135985051  | 5.676636609  | 6.40631083   |
| 4144 | -0.352108471 | -0.352108 | -0.352108471 | 6.163423754  | 6.101634422  | 6.225213087  |
| 4147 | 3.2896142    | 5.8242888 | 8.358963369  | 5.723485516  | 6.448764026  | 4.998207005  |
| 4148 | 5.273249497  | 5.977072  | 5.625160771  | -0.352108471 | -0.352108471 | -0.352108471 |
| 4150 | -0.352108471 | -0.352108 | -0.352108471 | 6.775725445  | 7.739056745  | 5.812394145  |
| 4152 | -0.352108471 | -0.352108 | -0.352108471 | 6.513654132  | 7.044177561  | 7.574700991  |
| 4154 | -0.352108471 | -0.352108 | -0.352108471 | 6.91804791   | 8.54376797   | 7.73090794   |
| 4157 | -0.352108471 | -0.352108 | -0.352108471 | 6.369156591  | 3.924634899  | 8.813678282  |
| 4162 | 6.41724734   | 6.479333  | 6.355161685  | 0.685292531  | 0.440372779  | 0.930212283  |
| 4163 | 5.945769727  | 4.8961342 | 6.995405288  | 6.82464971   | 5.350639199  | 6.087644454  |
| 4166 | 8.629198696  | 9.1409705 | 8.117426847  | 4.604363342  | 7.489034095  | 10.37370485  |
| 4170 | 8.411062485  | 6.3095778 | 7.360320155  | 7.514700892  | 7.646250764  | 7.777800636  |
| 4171 | 2.290106823  | 6.8500114 | 4.570059097  | 5.47633612   | 5.165247287  | 5.787424953  |
| 4172 | -0.352108471 | -0.352108 | -0.352108471 | 5.529311366  | 6.247772153  | 4.810850579  |
| 4173 | 7.495905985  | 8.0309191 | 8.565932308  | 1.744735086  | 1.939746065  | 1.549724107  |
| 4174 | -0.352108471 | -0.352108 | -0.352108471 | 6.505960865  | 8.638828366  | 4.373093364  |
| 4175 | -0.352108471 | -0.352108 | -0.352108471 | 5.958359385  | 5.081314597  | 6.835404172  |
| 4176 | -0.352108471 | -0.352108 | -0.352108471 | 6.6560422    | 4.838925816  | 8.473158585  |
| 4179 | 9.044293783  | 5.7520935 | 7.398193617  | 8.487159955  | 4.163460405  | 6.32531018   |



|      |              |           |              |              |              |              |
|------|--------------|-----------|--------------|--------------|--------------|--------------|
| 4189 | 4.669247064  | 5.5913056 | 6.513364113  | -0.352108471 | -0.352108471 | -0.352108471 |
| 4190 | 6.674128879  | 6.9102008 | 6.438057     | 8.855195458  | 6.911899654  | 4.96860385   |
| 4191 | 6.884519738  | 5.6886226 | 4.492725556  | 7.045200446  | 8.167416568  | 9.289632689  |
| 4192 | -0.352108471 | -0.352108 | -0.352108471 | 6.51496239   | 6.334665756  | 6.695259025  |
| 4193 | 8.068569844  | 8.7151305 | 7.422009174  | 4.686592411  | 3.006818612  | 5.327044813  |
| 4194 | 9.081461739  | 8.9237395 | 9.239184012  | 7.137829112  | 6.792804583  | 6.965316847  |
| 4199 | -0.352108471 | -0.352108 | -0.352108471 | 7.3583272    | 5.23376053   | 6.296043865  |
| 4200 | -0.352108471 | -0.352108 | -0.352108471 | 6.355161685  | 6.253639684  | 6.456683686  |
| 4201 | 4.864823855  | 6.9398718 | 9.014919741  | 7.819895981  | 4.83072438   | 6.32531018   |
| 4209 | 6.027539758  | 5.1577063 | 5.592623053  | 9.700302023  | 3.454664527  | 6.577483275  |
| 4210 | 8.244000603  | 9.320134  | 7.167867183  | 6.217439724  | 6.369505651  | 6.521571578  |
| 4211 | 6.573968999  | 6.8215739 | 6.326364144  | -0.352108471 | -0.352108471 | -0.352108471 |
| 4213 | 1.383520155  | -0.352108 | 3.119148782  | 6.295633508  | 6.33538923   | 6.255877787  |
| 4215 | -0.352108471 | -0.352108 | -0.352108471 | 5.761752405  | 7.409644383  | 6.585698394  |
| 4217 | -0.352108471 | -0.352108 | -0.352108471 | 3.119148782  | 3.043555546  | 3.194742017  |
| 4221 | -0.352108471 | -0.352108 | -0.352108471 | 7.38038141   | 4.80208491   | 2.22378841   |
| 4224 | 2.827133462  | 2.3862175 | 1.945301519  | -0.352108471 | -0.352108471 | -0.352108471 |
| 4232 | -0.352108471 | -0.352108 | -0.352108471 | 7.025721295  | 7.040868605  | 7.010573985  |
| 4233 | 6.898151259  | 5.8954442 | 4.892737062  | 6.56915909   | 8.392473598  | 4.745844581  |
| 4237 | -0.352108471 | -0.352108 | -0.352108471 | 2.469725738  | 2.686833264  | 2.252618212  |
| 4238 | -0.352108471 | -0.352108 | -0.352108471 | 5.069524118  | 5.121323858  | 5.095423988  |
| 4240 | 7.525980954  | 7.6091098 | 7.567545379  | 8.018899753  | 7.866462943  | 8.171336563  |
| 4245 | 8.130720735  | 7.6225236 | 7.114326424  | 11.57969288  | 5.520706995  | 8.550199937  |
| 4248 | -0.352108471 | -0.352108 | -0.352108471 | 4.481992975  | 4.559699198  | 4.637405421  |
| 4249 | 4.587909535  | 6.3286006 | 5.458255064  | 7.454358007  | 8.483896794  | 6.424819219  |
| 4256 | -0.352108471 | -0.352108 | -0.352108471 | 6.32531018   | 8.558646784  | 4.091973577  |
| 4257 | 7.096275165  | 5.6886226 | 4.280970129  | 6.796814879  | 6.374924086  | 7.218705673  |
| 4259 | 1.841742379  | 4.3155755 | 6.789408685  | 4.686642568  | 6.790856466  | 8.895070364  |
| 4261 | 7.232246321  | 6.2740163 | 6.75313132   | 3.732542874  | 1.876861374  | 5.588224375  |
| 4267 | 6.483998938  | 5.221876  | 5.852937462  | 9.599285526  | 7.878393458  | 11.32017759  |
| 4277 | 5.019618295  | 5.1209983 | 4.918238335  | 1.640731613  | 1.731739118  | 1.549724107  |
| 4281 | -0.352108471 | -0.352108 | -0.352108471 | 5.017136436  | 5.054280952  | 4.979991919  |
| 4282 | 5.624956163  | 7.5396075 | 3.710304865  | 6.356810511  | 9.974349779  | 8.165580145  |
| 4284 | -0.352108471 | -0.352108 | -0.352108471 | 5.704335255  | 6.123165202  | 5.285505308  |
| 4285 | 6.798388465  | 6.86419   | 6.831289207  | -0.352108471 | -0.352108471 | -0.352108471 |
| 4287 | 6.927039912  | 6.8104362 | 6.693832542  | 3.195265415  | 5.8170712    | 4.506168307  |
| 4288 | 3.515141236  | 5.0420722 | 1.988210268  | 7.955364032  | 6.395718659  | 7.175541346  |
| 4289 | 3.690770627  | 3.136327  | 4.245214285  | 2.902991023  | 2.686833264  | 3.119148782  |
| 4293 | 6.969264514  | 6.8813157 | 7.057213293  | 5.640720806  | 7.528925542  | 6.584823174  |
| 4294 | 0.343135243  | 2.3139417 | 4.284748205  | -0.352108471 | -0.352108471 | -0.352108471 |
| 4296 | 4.814937125  | 5.3546856 | 5.894434173  | 7.423441836  | 5.795644211  | 6.609543024  |
| 4298 | 7.042523083  | 7.0441776 | 7.040868605  | 7.1850208    | 7.204087928  | 7.165953671  |
| 4299 | 6.714347992  | 5.4283939 | 4.142439756  | 4.365549686  | 5.972765965  | 5.169157826  |
| 4301 | -0.352108471 | -0.352108 | -0.352108471 | 4.526646886  | 4.927679215  | 5.328711544  |
| 4302 | 5.79087272   | 6.2558778 | 5.325867653  | 3.531321319  | 5.254689875  | 1.807952763  |
| 4303 | 6.396868383  | 8.0950509 | 4.698685899  | -0.352108471 | -0.352108471 | -0.352108471 |
| 4311 | 1.501017585  | -0.352108 | 3.354143641  | 7.953816429  | 10.20133212  | 5.706300735  |



|      |              |           |              |              |              |              |
|------|--------------|-----------|--------------|--------------|--------------|--------------|
| 4312 | 5.595965532  | 10.792868 | 8.1944168    | 9.153391828  | 8.281596292  | 10.02518736  |
| 4313 | 4.206794112  | 7.3893229 | 5.798058523  | 8.157941569  | 7.790593864  | 8.525289274  |
| 4314 | 7.196345585  | 9.9574592 | 8.576902394  | 8.324271493  | 8.339641505  | 8.30890148   |
| 4320 | 1.880238567  | 4.1125856 | -0.352108471 | 7.201489776  | 7.233835407  | 7.169144145  |
| 4323 | 8.46749963   | 7.8942072 | 9.040792017  | 8.026705837  | 9.711407821  | 6.342003854  |
| 4324 | -0.352108471 | -0.352108 | -0.352108471 | 5.095423988  | 4.567537243  | 5.623310733  |
| 4326 | 6.272107604  | 6.7545585 | 7.237009448  | -0.352108471 | -0.352108471 | -0.352108471 |
| 4329 | 8.018461777  | 9.4062994 | 10.79413709  | 9.898470394  | 6.740352179  | 8.319411287  |
| 4337 | 5.017136436  | 5.6984289 | 4.335843999  | -0.352108471 | -0.352108471 | -0.352108471 |
| 4338 | -0.352108471 | -0.352108 | -0.352108471 | 6.826708063  | 6.853520053  | 6.840114058  |
| 4350 | 4.332763977  | 5.9002924 | 7.467820784  | 5.529311366  | 7.770566641  | 3.28805609   |
| 4351 | 6.90942626   | 6.6898785 | 7.128974067  | 2.902991023  | 3.119148782  | 2.686833264  |
| 4357 | -0.352108471 | -0.352108 | -0.352108471 | 4.089348696  | 6.480600016  | 5.284974356  |
| 4358 | -0.352108471 | -0.352108 | -0.352108471 | 5.27373346   | 6.840321172  | 8.406908884  |
| 4361 | 2.452184546  | 3.215649  | 1.684596322  | -0.321459837 | -0.695874124 | -0.478596451 |
| 4363 | 5.247570549  | 5.1874117 | 3.640612084  | -0.352108471 | -0.352108471 | -0.352108471 |
| 4430 | -0.352108471 | -0.352108 | -0.352108471 | 7.209478834  | 6.377345773  | 8.041611895  |
| 4437 | 8.159410538  | 6.6000148 | 5.040619027  | 1.939639127  | 1.731739118  | 2.147539136  |
| 4478 | 7.567891492  | 5.9519074 | 9.183875572  | 8.484997074  | 8.68061739   | 8.582807232  |
| 4481 | 3.844844031  | 3.1277379 | 2.410631719  | 5.837940989  | 4.500374663  | 5.169157826  |
| 4487 | 6.067640851  | 5.3568958 | 4.64615067   | 5.535358938  | 6.192065872  | 4.878652004  |
| 4488 | 6.414258136  | 4.5467519 | 8.281764324  | -0.352108471 | -0.352108471 | -0.352108471 |
| 4493 | 5.244785742  | 7.3621367 | 6.303461245  | 4.512470078  | 8.817432389  | 6.664951234  |
| 4500 | 5.181868293  | 5.8001998 | 6.418531282  | 0.689815323  | -0.352108471 | 1.731739118  |
| 4501 | -0.352108471 | -0.352108 | -0.352108471 | 6.78903144   | 5.085607333  | 3.382183226  |
| 4502 | 9.589108181  | 9.6063484 | 9.571868     | 10.12442447  | 10.12985608  | 10.11899287  |
| 4507 | 10.79155834  | -0.912833 | 4.939362434  | 2.259030153  | 9.88105778   | 6.070043966  |
| 4520 | 5.469477566  | 10.06026  | 7.764868579  | 6.040996349  | 7.188691756  | 8.336387163  |
| 4521 | -0.352108471 | -0.352108 | -0.352108471 | 3.919505936  | 3.869275727  | 3.969736144  |
| 4522 | 6.433318728  | 5.5725243 | 7.294113136  | 7.479274919  | 9.373891901  | 5.584657936  |
| 4524 | 6.745249056  | 6.7820557 | 6.708442397  | 6.574970966  | -1.373708953 | 2.600631006  |
| 4547 | -0.352108471 | -0.352108 | -0.352108471 | 2.698725627  | 3.722510298  | 4.746294969  |
| 4548 | 5.61148882   | 5.1933187 | 4.775148581  | 0.975533543  | 0.808855576  | 1.14221151   |
| 4580 | 6.573968999  | 8.7027753 | 4.445162735  | 5.046451356  | 6.165870606  | 7.285289856  |
| 4584 | 6.832572932  | 5.3282636 | 8.336882253  | 5.891036168  | 6.115255476  | 5.666816861  |
| 4589 | -0.352108471 | -0.352108 | -0.352108471 | 2.124237496  | 2.147539136  | 2.100935855  |
| 4594 | -0.352108471 | -0.352108 | -0.352108471 | 3.686004553  | 7.719873506  | 5.702939029  |
| 4598 | 6.332466669  | 6.3284751 | 6.336458243  | -0.352108471 | -0.352108471 | -0.352108471 |
| 4601 | -0.352108471 | -0.352108 | -0.352108471 | 2.42544395   | 3.119148782  | 1.731739118  |
| 4605 | 7.1250675    | 4.3940765 | 9.85605846   | 4.57059334   | 5.821410838  | 7.072228335  |
| 4615 | 3.127737875  | 3.136327  | 3.119148782  | 5.539921566  | 7.780089551  | 6.660005559  |
| 4616 | -0.352108471 | -0.352108 | -0.352108471 | 6.913488898  | 6.926801914  | 6.900175883  |
| 4619 | -0.352108471 | -0.352108 | -0.352108471 | 5.404838007  | 5.315258837  | 5.494417177  |
| 4620 | 9.289237391  | 3.417918  | 6.353577689  | 1.394345699  | 1.646479888  | 1.14221151   |
| 4624 | 4.452567255  | 7.3480175 | 5.90029238   | -0.352108471 | -0.352108471 | -0.352108471 |
| 4627 | 10.11228834  | 7.743997  | 8.92814266   | 11.25553907  | 8.19236098   | 9.723950025  |
| 4628 | 8.739656026  | 7.1777769 | 5.615897853  | 7.407593833  | 10.38951686  | 4.425670803  |

|      |              |           |              |              |              |              |
|------|--------------|-----------|--------------|--------------|--------------|--------------|
| 4629 | 2.515697587  | 1.4248335 | 3.606561644  | -0.352108471 | -0.352108471 | -0.352108471 |
| 4635 | 2.8251001    | 4.5390203 | 1.111179894  | -0.352108471 | -0.352108471 | -0.352108471 |
| 4637 | 8.684000558  | 10.401259 | 12.11851696  | 11.09330097  | 10.51247478  | 9.931648591  |
| 4638 | 5.401204581  | 6.573969  | 7.746733418  | 6.587072453  | 6.034016405  | 7.140128501  |
| 4641 | 5.813348161  | 7.3518709 | 8.890393566  | 7.094909768  | 6.956409727  | 7.233409808  |
| 4643 | -0.352108471 | -0.352108 | -0.352108471 | 8.712126777  | 4.385755625  | 6.548941201  |
| 4644 | 5.818193103  | 5.6562895 | 5.494385972  | 5.564673104  | 6.540914996  | 4.588431211  |
| 4645 | 7.296633267  | 8.235564  | 9.174494801  | -0.352108471 | -0.352108471 | -0.352108471 |
| 4648 | -0.352108471 | -0.352108 | -0.352108471 | 5.178880455  | 4.444959     | 5.91280191   |
| 4650 | 7.042523083  | 5.6333287 | 8.451717423  | 6.931936377  | 6.43736786   | 7.426504894  |
| 4651 | 7.801433444  | 7.4069509 | 7.012468401  | -0.352108471 | -0.352108471 | -0.352108471 |
| 4659 | 6.589936892  | 4.123008  | 5.35647247   | 4.426911875  | 8.36682489   | 6.396868383  |
| 4660 | 7.206366837  | 6.8625991 | 6.518831283  | 3.325487676  | 3.33713378   | 3.348779883  |
| 4664 | -0.352108471 | -0.352108 | -0.352108471 | 1.968661759  | 1.997577452  | 1.939746065  |
| 4666 | 9.304369252  | 8.7679235 | 9.840815009  | 8.808833741  | 9.341764806  | 9.075299274  |
| 4669 | -0.352108471 | -0.352108 | -0.352108471 | 6.56915909   | 6.588465267  | 6.549852913  |
| 4670 | 7.101491044  | 6.9537095 | 7.24927257   | 7.959094411  | 5.158073079  | 6.558583745  |
| 4671 | 7.134970938  | 6.271725  | 5.408478963  | 0.624614178  | 0.808855576  | 0.440372779  |
| 4673 | 8.109483438  | 7.3820952 | 7.745789317  | 9.501084086  | 8.078573586  | 6.656063086  |
| 4676 | 6.191905554  | 7.0881332 | 6.640019393  | 6.764566064  | 7.95460543   | 7.359585747  |
| 4677 | -0.352108471 | -0.352108 | -0.352108471 | 7.036396027  | 7.8349852    | 6.237806853  |
| 4681 | -0.352108471 | -0.352108 | -0.352108471 | 2.439698732  | 2.151665788  | 2.29568226   |
| 4683 | 2.396854745  | 2.5478969 | 3.215469875  | -0.352108471 | -0.352108471 | -0.352108471 |
| 4686 | 6.385512177  | 6.9245353 | 5.846489095  | 7.070474755  | 7.433592114  | 6.707357397  |
| 4688 | -0.352108471 | -0.352108 | -0.352108471 | 2.795182383  | -2.338281344 | 7.92864611   |
| 4691 | 9.736965645  | 8.4342949 | 9.085630255  | 8.907723458  | 8.650873139  | 8.394022819  |
| 4695 | 4.538924602  | 5.4283939 | 6.317863146  | -0.352108471 | -0.352108471 | -0.352108471 |
| 4696 | 5.55876787   | 6.190176  | 4.927359749  | 7.651534373  | 3.795436658  | 5.723485516  |
| 4697 | 2.93044989   | 4.9045729 | 6.878695902  | 6.528762632  | 6.523594479  | 6.518426326  |
| 4700 | -0.352108471 | -0.352108 | -0.352108471 | 6.686203675  | 6.405697902  | 6.545950789  |
| 4702 | 6.229721613  | 6.2312245 | 6.228218771  | 6.556689902  | 6.588465267  | 6.524914536  |
| 4704 | -0.352108471 | -0.352108 | -0.352108471 | 6.2015591    | 5.938528832  | 6.070043966  |
| 4705 | -0.352108471 | -0.352108 | -0.352108471 | 6.866733042  | 6.880482436  | 6.852983648  |
| 4707 | -0.352108471 | -0.352108 | -0.352108471 | 1.968661759  | 1.997577452  | 1.939746065  |
| 4708 | -0.352108471 | -0.352108 | -0.352108471 | 2.124237496  | -0.234927404 | 4.483402396  |
| 4709 | -0.352108471 | -0.352108 | -0.352108471 | 5.075767034  | 6.724665022  | 8.373563009  |
| 4710 | 6.972942587  | 5.6283137 | 6.300628137  | 6.039651413  | 5.822636979  | 6.256665848  |
| 4712 | -0.352108471 | -0.352108 | -0.352108471 | 4.923545639  | 4.813836795  | 4.868691217  |
| 4713 | -0.352108471 | -0.352108 | -0.352108471 | 6.312768514  | 7.679834019  | 4.945703008  |
| 4714 | 5.980334028  | 5.1744201 | 6.786247948  | 8.019064489  | 6.577066306  | 5.135068122  |
| 4715 | -0.352108471 | -0.352108 | -0.352108471 | 5.980334028  | 6.002308672  | 5.958359385  |
| 4716 | 7.395208386  | 5.3314837 | 9.458933026  | 9.609485593  | 8.065096422  | 6.520707251  |
| 4717 | -0.352108471 | -0.352108 | -0.352108471 | 5.458255064  | 5.458255064  | 5.458255064  |
| 4718 | 6.450513319  | 5.4203906 | 4.390267943  | 6.408567459  | 5.67247832   | 6.040522889  |
| 4719 | -0.352108471 | -0.352108 | -0.352108471 | 2.024343053  | 2.051108653  | 1.997577452  |
| 4720 | 6.020381091  | 9.3909205 | 2.649841648  | 6.859217306  | 7.904812393  | 5.813622218  |
| 4722 | -0.352108471 | -0.352108 | -0.352108471 | 9.729402426  | 6.926938623  | 4.12447482   |

|      |              |           |              |              |              |              |
|------|--------------|-----------|--------------|--------------|--------------|--------------|
| 4723 | -0.352108471 | -0.352108 | -0.352108471 | 7.28629428   | 6.74407332   | 6.20185236   |
| 4725 | 4.145039127  | 6.0337853 | 5.089412202  | 6.735779686  | 5.827487879  | 7.644071493  |
| 4726 | 5.876276997  | 5.3069628 | 6.445591224  | 8.108423186  | 5.412561087  | 2.716698988  |
| 4728 | -0.352108471 | -0.352108 | -0.352108471 | 6.671874638  | 7.417010808  | 5.926738469  |
| 4729 | -0.352108471 | -0.352108 | -0.352108471 | 5.55876787   | 5.588224375  | 5.529311366  |
| 4731 | 5.842545835  | 7.0411335 | 8.239721172  | 5.811232824  | 6.818547907  | 6.314890366  |
| 4734 | -0.352108471 | -0.352108 | -0.352108471 | 4.716325722  | 2.119531972  | 3.417928847  |
| 4735 | 9.528676853  | 8.5203418 | 7.512006741  | 7.129338548  | 9.258328877  | 8.193833712  |
| 4736 | 8.863871142  | 8.8514692 | 8.876273132  | 9.079598146  | 9.079990183  | 9.079206108  |
| 4738 | 4.511589627  | 5.6886226 | 6.865655667  | 9.91227198   | 5.29515642   | 7.6037142    |
| 4741 | 7.427431143  | 9.9143595 | 4.940502771  | 3.585121301  | 5.1376944    | 2.032548203  |
| 4744 | 5.279913244  | 6.4153434 | 5.847628321  | -0.352108471 | -0.352108471 | -0.352108471 |
| 4747 | 7.055583237  | 7.242522  | 7.429460688  | -0.352108471 | -0.352108471 | -0.352108471 |
| 4751 | -0.352108471 | -0.352108 | -0.352108471 | 5.458255064  | 4.860098497  | 6.056411632  |
| 4752 | 5.250659072  | 6.2481452 | 5.749402114  | -0.352108471 | -0.352108471 | -0.352108471 |
| 4753 | -0.352108471 | -0.352108 | -0.352108471 | 6.838058947  | 1.199415736  | 4.018737342  |
| 4756 | 6.242048279  | 6.9147183 | 5.569378218  | -0.352108471 | -0.352108471 | -0.352108471 |
| 4758 | -0.352108471 | -0.352108 | -0.352108471 | 6.939503072  | 4.779731665  | 5.859617369  |
| 4762 | 1.392109249  | 2.8999886 | -0.115770115 | 2.22936792   | 2.928781162  | 1.529954679  |
| 4771 | 7.859001556  | 7.33283   | 8.385173089  | 9.232911027  | 5.987948285  | 7.610429656  |
| 4776 | -0.352108471 | -0.352108 | -0.352108471 | 4.018737342  | 4.482692559  | 3.554782125  |
| 4779 | -0.352108471 | -0.352108 | -0.352108471 | 11.81114155  | 3.63178494   | 7.721463244  |
| 4780 | 4.197141794  | 7.6812426 | 5.939192221  | 6.369156591  | 5.39355723   | 7.344755951  |
| 4781 | -0.352108471 | -0.352108 | -0.352108471 | 5.169157826  | 5.191222747  | 5.147092904  |
| 4783 | 6.607377459  | 7.6292212 | 5.585533755  | 6.056053999  | 5.548670833  | 6.563437165  |
| 4784 | 0.558857181  | 5.6966186 | 3.127737875  | 6.761711516  | 6.136795257  | 5.511878999  |
| 4790 | -0.352108471 | -0.352108 | -0.352108471 | 5.704335255  | 3.734458756  | 7.674211754  |
| 4791 | -0.352108471 | -0.352108 | -0.352108471 | 6.022050925  | 6.853351495  | 5.190750356  |
| 4792 | 7.263578805  | 6.1469962 | 6.705287512  | -0.352108471 | -0.352108471 | -0.352108471 |
| 4793 | 8.954450461  | 3.5296461 | 6.242048279  | 2.065292044  | 4.482692559  | -0.352108471 |
| 4795 | -0.352108471 | -0.352108 | -0.352108471 | 4.08236011   | 6.057350711  | 2.107369509  |
| 4796 | 8.046493711  | 8.9293538 | 7.163633589  | 7.321702251  | 5.670030507  | 8.973373995  |
| 4799 | 10.60697838  | 6.9230377 | 8.765008053  | 4.69815125   | 6.384751587  | 5.541451418  |
| 4800 | 5.351365058  | 5.5054227 | 5.428393874  | 6.168413667  | 5.971674266  | 6.070043966  |
| 4802 | 2.38621749   | 3.1700633 | 1.602371631  | 6.756268637  | 5.128763636  | 3.501258635  |
| 4808 | 5.217491139  | 3.672385  | 6.76259727   | -0.352108471 | -0.352108471 | -0.352108471 |
| 4811 | 7.174662452  | 7.2334203 | 7.292178125  | 7.213622785  | 5.763046254  | 6.48833452   |
| 4814 | 7.179976733  | 6.991795  | 6.803613363  | -0.352108471 | -0.352108471 | -0.352108471 |
| 4817 | -0.352108471 | -0.352108 | -0.352108471 | 6.221635402  | 5.821410838  | 5.421186274  |
| 4820 | -0.352108471 | -0.352108 | -0.352108471 | 2.686833264  | 2.686833264  | 2.686833264  |
| 4824 | 6.537383725  | 5.4748067 | 7.599960781  | -0.352108471 | -0.352108471 | -0.352108471 |
| 4830 | 8.929681391  | 8.9505275 | 8.940104426  | 5.639358717  | 7.592575489  | 9.545792262  |
| 4831 | -0.352108471 | -0.352108 | -0.352108471 | 7.444649669  | 5.890891646  | 6.667770658  |
| 4832 | 7.515379209  | 5.5239687 | 6.519673958  | -0.352108471 | -0.352108471 | -0.352108471 |
| 4833 | 4.622283101  | 8.0818246 | 6.352053864  | 8.221109655  | 8.552891926  | 8.884674198  |
| 4836 | 6.99593518   | 8.8260358 | 5.165834595  | -0.352108471 | -0.352108471 | -0.352108471 |
| 4837 | 5.767677584  | 6.8651991 | 6.316438365  | 5.86942674   | 5.773394936  | 5.821410838  |

|      |              |           |              |              |              |              |
|------|--------------|-----------|--------------|--------------|--------------|--------------|
| 4839 | 6.224441527  | 6.1747497 | 6.199595632  | -0.352108471 | -0.352108471 | -0.352108471 |
| 4841 | 9.498746247  | 7.3703059 | 5.241865462  | 5.345317269  | 11.31228186  | 8.328799565  |
| 4842 | 6.705287512  | 6.6898785 | 6.720696571  | 5.366045608  | 5.665786693  | 5.066304524  |
| 4849 | 6.640019393  | 5.5983174 | 7.681721415  | 8.613410144  | 5.159810746  | 6.886610445  |
| 4850 | -0.352108471 | -0.352108 | -0.352108471 | 7.63716551   | 5.095423988  | 2.553682466  |
| 4851 | 5.553158928  | 6.2248629 | 6.896566821  | 7.191596866  | 6.771155442  | 6.350714019  |
| 4854 | 6.63917186   | 7.6502017 | 5.628142065  | -0.352108471 | -0.352108471 | -0.352108471 |
| 4855 | 3.805664353  | 2.2586468 | 5.352681881  | 2.204376426  | 0.089391828  | 4.319361024  |
| 4861 | 2.65478974   | 3.5584878 | 1.751091711  | -0.352108471 | -0.352108471 | -0.352108471 |
| 4862 | 6.212536209  | 4.5937715 | 7.831300868  | 4.492606088  | 6.874484741  | 9.256363394  |
| 4863 | 9.491856004  | 6.4333187 | 3.374781452  | 0.440372779  | 0.440372779  | 0.440372779  |
| 4867 | -0.352108471 | -0.352108 | -0.352108471 | 5.775068216  | 5.804293869  | 5.745842563  |
| 4868 | 6.347084208  | 9.650417  | 3.043751389  | 7.675713744  | 4.484843478  | 6.080278611  |
| 4869 | 8.465783601  | 9.7740553 | 9.119919459  | 12.84323422  | 9.447697678  | 6.052161136  |
| 4882 | 6.001719323  | 5.6886226 | 5.375525971  | 6.175838856  | 5.789762726  | 5.403686596  |
| 4892 | -0.352108471 | -0.352108 | -0.352108471 | 2.559157923  | 3.932093789  | 3.245625856  |
| 4898 | -0.352108471 | -0.352108 | -0.352108471 | 7.952186442  | 5.631147761  | 10.27322512  |
| 4900 | -0.352108471 | -0.352108 | -0.352108471 | 4.156200799  | 5.511864271  | 6.867527744  |
| 4904 | 9.214972473  | 9.2179805 | 9.211964436  | 9.853768603  | 9.878102074  | 9.829435133  |
| 4907 | 7.08718283   | 7.0919708 | 7.082394844  | 8.166316988  | 8.17464636   | 8.157987616  |
| 4921 | -0.352108471 | -0.352108 | -0.352108471 | 4.010144333  | 3.119148782  | 4.901139884  |
| 4924 | 3.751483677  | 6.9398718 | 10.12825992  | 7.660075902  | 7.326356364  | 6.992636827  |
| 4925 | -0.352108471 | -0.352108 | -0.352108471 | 6.383555469  | 6.204656258  | 6.025757047  |
| 4926 | 7.230452779  | 8.3092275 | 7.769840125  | 10.05860736  | 4.882763655  | 7.470685508  |
| 4927 | -0.352108471 | -0.352108 | -0.352108471 | 5.085906025  | 4.80208491   | 4.518263795  |
| 4928 | 2.016914154  | 0.334605  | 3.699223337  | 9.063961412  | 3.930402636  | 6.497182024  |
| 4931 | -0.352108471 | -0.352108 | -0.352108471 | 6.569544076  | 4.705049281  | 5.637296679  |
| 4942 | 5.310128272  | 5.6251608 | 5.94019327   | 5.924438939  | 6.602454754  | 7.280470568  |
| 4946 | 9.701580204  | 9.7178823 | 9.685278138  | 9.640182848  | 9.654354648  | 9.626011048  |
| 4947 | -0.352108471 | -0.352108 | -0.352108471 | 8.318152999  | 6.655711164  | 4.993269329  |
| 4953 | -0.352108471 | -0.352108 | -0.352108471 | 5.663737322  | 5.665786693  | 5.661687951  |
| 4967 | 4.292235829  | 5.463922  | 6.635608221  | 7.078372564  | 8.51496253   | 5.641782597  |
| 4973 | -0.352108471 | -0.352108 | -0.352108471 | 9.523685091  | 7.117815169  | 4.711945247  |
| 4982 | 7.267316685  | 5.9002924 | 4.533268075  | -0.352108471 | -0.352108471 | -0.352108471 |
| 4986 | 4.052529647  | 3.8840619 | 3.715594144  | 5.584676343  | 5.072643583  | 6.096709104  |
| 4987 | 5.089848387  | 5.4937832 | 5.897718043  | -0.352108471 | -0.352108471 | -0.352108471 |
| 4988 | 8.500639689  | 8.5281884 | 8.473091016  | 7.584133668  | 7.204087928  | 7.964179408  |
| 4998 | -0.352108471 | -0.352108 | -0.352108471 | 4.80208491   | 4.843308497  | 4.760861323  |
| 4999 | -0.352108471 | -0.352108 | -0.352108471 | 2.252618212  | 2.252618212  | 2.252618212  |
| 5001 | 6.244979906  | 6.9029581 | 6.573968999  | -0.352108471 | -0.352108471 | -0.352108471 |
| 5007 | 6.887397702  | 7.0476248 | 6.967511245  | 7.892049344  | 7.142338625  | 6.392627907  |
| 5018 | 7.860171405  | 6.991795  | 6.12341869   | 9.15197693   | 7.560805595  | 5.969634259  |
| 5019 | -0.352108471 | -0.352108 | -0.352108471 | 4.621398669  | 6.682822443  | 8.744246216  |
| 5021 | 4.91793435   | 5.7494021 | 6.580869878  | 8.313256858  | 7.837782546  | 7.362308235  |
| 5027 | 4.634500951  | 3.2452353 | 1.855969659  | 1.996031974  | 2.686833264  | 1.305230684  |
| 5029 | 7.855015023  | 8.0173603 | 7.692669739  | 6.55537083   | 6.662724824  | 6.448016836  |
| 5032 | -0.352108471 | -0.352108 | -0.352108471 | 6.165870606  | 6.915241236  | 5.416499976  |

|      |              |           |              |              |              |              |
|------|--------------|-----------|--------------|--------------|--------------|--------------|
| 5033 | -0.352108471 | -0.352108 | -0.352108471 | 4.137528819  | 3.997568872  | 4.277488766  |
| 5034 | 9.545932729  | 10.535088 | 8.55677776   | 9.474567229  | 11.24645329  | 7.702681166  |
| 5036 | 4.059996578  | 5.2188923 | 6.377788019  | 8.016557681  | 8.559960985  | 8.288259333  |
| 5037 | 8.596083782  | 7.4338641 | 6.271644416  | 8.368124202  | 9.821741439  | 6.914506965  |
| 5042 | 7.067110169  | 5.4805543 | 6.273832259  | -0.352108471 | -0.352108471 | -0.352108471 |
| 5045 | 3.127737875  | 3.136327  | 3.119148782  | 6.949901658  | 8.548295331  | 5.351507985  |
| 5048 | -0.352108471 | -0.352108 | -0.352108471 | 1.971424247  | 5.781713541  | 3.876568894  |
| 5050 | 4.588229335  | 8.7600284 | 6.674128879  | -0.352108471 | -0.352108471 | -0.352108471 |
| 5051 | 5.283085258  | 4.2452143 | 6.320956231  | 2.124237496  | 2.100935855  | 2.147539136  |
| 5052 | 5.950169773  | 9.2266923 | 7.588431014  | 10.88399351  | 9.099143573  | 7.314293634  |
| 5054 | 9.918028656  | 11.87624  | 7.959817397  | 11.88521834  | 8.123181199  | 10.00419977  |
| 5055 | -0.352108471 | -0.352108 | -0.352108471 | 5.412561087  | 4.878397677  | 5.946724498  |
| 5058 | 1.454377468  | 8.3029535 | 4.878665478  | -0.352108471 | -0.352108471 | -0.352108471 |
| 5062 | 2.294889372  | 4.9540232 | 3.624456288  | 1.53887571   | 2.147539136  | 0.930212283  |
| 5066 | -0.352108471 | -0.352108 | -0.352108471 | 6.724469766  | 6.759061079  | 6.689878453  |
| 5067 | -0.352108471 | -0.352108 | -0.352108471 | 0.220993655  | 3.228447668  | 6.235901681  |
| 5069 | 6.242048279  | 8.8016144 | 3.682482183  | -0.352108471 | -0.352108471 | -0.352108471 |
| 5071 | 5.055866407  | 7.9461706 | 10.83647476  | 7.537461589  | 7.543756086  | 7.531167092  |
| 5076 | -0.352108471 | -0.352108 | -0.352108471 | 8.324672814  | 3.787435184  | 6.056053999  |
| 5079 | -0.352108471 | -0.352108 | -0.352108471 | 2.12260699   | 4.368644722  | 3.245625856  |
| 5082 | 3.755013405  | 3.1277379 | 2.500462346  | 3.658858234  | 3.712420317  | 3.685639275  |
| 5087 | -0.352108471 | -0.352108 | -0.352108471 | 4.178899946  | 4.245214285  | 4.112585606  |
| 5089 | -0.352108471 | -0.352108 | -0.352108471 | 8.301193095  | 4.530664855  | 6.415928975  |
| 5090 | -0.352108471 | -0.352108 | -0.352108471 | 5.684018474  | 5.691282674  | 5.676754274  |
| 5092 | -0.352108471 | -0.352108 | -0.352108471 | 5.575983727  | 5.588224375  | 5.563743079  |
| 5093 | 5.493783215  | 5.7281296 | 5.259436874  | 7.850864511  | 7.693029665  | 7.771947088  |
| 5094 | 8.512176162  | 9.1380121 | 7.886340266  | 8.310966687  | 8.458390911  | 8.163542463  |
| 5095 | 2.322223374  | 7.7678285 | 5.045025943  | 0.044132154  | 0.440372779  | -0.352108471 |
| 5097 | -0.352108471 | -0.352108 | -0.352108471 | 2.252618212  | 2.252618212  | 2.252618212  |
| 5098 | -0.352108471 | -0.352108 | -0.352108471 | 2.64968008   | 3.245625856  | 3.841571632  |
| 5099 | 5.407340099  | 6.0379816 | 6.66862306   | 7.027509989  | 5.88700099   | 4.746491991  |
| 5100 | 5.939192221  | 5.975478  | 5.902906493  | 0.044132154  | 0.440372779  | -0.352108471 |
| 5101 | 4.870582734  | 6.0203811 | 7.170179449  | -0.352108471 | -0.352108471 | -0.352108471 |
| 5108 | 4.259723664  | 1.2565661 | 7.262881203  | 6.070426394  | 7.005375408  | 5.13547738   |
| 5110 | 6.502263028  | 6.5150311 | 6.489495002  | -0.352108471 | -0.352108471 | -0.352108471 |
| 5111 | -0.352108471 | -0.352108 | -0.352108471 | 1.383520155  | 3.119148782  | 1.352108471  |
| 5116 | 8.321094611  | 10.253151 | 6.389037818  | 0.862346501  | 3.476503449  | 2.169424975  |
| 5118 | 6.3205178    | 8.6059353 | 4.03510028   | 7.810573293  | 7.602066282  | 8.019080303  |
| 5119 | 6.463674915  | 6.4045531 | 6.522796691  | 7.458282885  | 8.86878796   | 6.047777809  |
| 5127 | 5.900507315  | 5.4517617 | 5.003016105  | 5.857894423  | 5.259641318  | 5.55876787   |
| 5128 | 3.731346161  | 5.3920614 | 7.052776556  | 6.118252212  | 4.94037052   | 5.529311366  |
| 5130 | 8.133208341  | 4.8713177 | 6.502263028  | 0.440372779  | 0.440372779  | 0.440372779  |
| 5134 | 4.430450315  | 4.2007007 | 4.315575532  | 2.43016825   | -0.352108471 | 5.212444972  |
| 5142 | 3.955548729  | 7.5949144 | 5.775231583  | 4.649275848  | 5.369332089  | 6.089388329  |
| 5145 | 8.65426028   | 8.0426248 | 9.265895759  | 5.477806065  | 8.073723753  | 10.66964144  |
| 5147 | -0.352108471 | -0.352108 | -0.352108471 | 5.565967891  | 5.385936115  | 5.205904339  |
| 5150 | 6.724232601  | 6.7378745 | 6.75151633   | 7.280454328  | 6.577066306  | 5.873678283  |

|      |              |           |              |              |              |              |
|------|--------------|-----------|--------------|--------------|--------------|--------------|
| 5152 | 4.23970035   | 5.5176306 | 4.878665478  | -0.352108471 | -0.352108471 | -0.352108471 |
| 5154 | 3.733364623  | 4.1125856 | 3.354143641  | 6.270222109  | 6.31523113   | 6.225213087  |
| 5155 | -0.352108471 | -0.352108 | -0.352108471 | 5.095423988  | 3.162428145  | 7.028419831  |
| 5156 | -0.352108471 | -0.352108 | -0.352108471 | 5.412561087  | 5.421579811  | 5.403542364  |
| 5157 | -0.352108471 | -0.352108 | -0.352108471 | 2.985292752  | 2.211943219  | 1.438593686  |
| 5158 | 7.328889755  | 7.9810218 | 7.654955776  | 3.682181533  | 4.245214285  | 3.119148782  |
| 5159 | 2.482465675  | 7.4115487 | 4.947007189  | 9.375316417  | 3.867019673  | 6.621168045  |
| 5162 | -0.352108471 | -0.352108 | -0.352108471 | 2.211943219  | 2.232575625  | 2.191310813  |
| 5164 | -0.352108471 | -0.352108 | -0.352108471 | 7.394473955  | 6.165870606  | 4.937267257  |
| 5165 | 7.921010324  | 6.2673481 | 9.574672526  | 6.794421722  | 5.62888596   | 7.959957484  |
| 5168 | 8.158643864  | 5.3129155 | 6.735779686  | -0.352108471 | -0.352108471 | -0.352108471 |
| 5170 | 4.064821542  | 8.178236  | 6.121528769  | -0.352108471 | -0.352108471 | -0.352108471 |
| 5172 | 6.736972953  | 8.0347672 | 7.385870058  | 5.827895643  | 5.50095564   | 6.154835645  |
| 5175 | 4.214559554  | 4.9718953 | 5.729231143  | 6.824475474  | 5.052267685  | 3.280059897  |
| 5178 | 4.689057965  | 5.2849744 | 5.880890748  | -0.352108471 | -0.352108471 | -0.352108471 |
| 5184 | 3.515141236  | 3.6761388 | 3.354143641  | 7.175541346  | 7.18512902   | 7.165953671  |
| 5187 | -0.352108471 | -0.352108 | -0.352108471 | 2.38621749   | 0.175723873  | 4.596711107  |
| 5188 | 5.493783215  | 4.3737166 | 6.613849861  | 6.454600772  | 6.315788466  | 6.593413078  |
| 5195 | -0.352108471 | -0.352108 | -0.352108471 | 7.193753783  | 5.88700099   | 4.580248196  |
| 5198 | 6.434171087  | 6.1643979 | 6.299284512  | 6.373446373  | 1.544156138  | 3.958801255  |
| 5202 | 3.452931972  | 1.6698571 | -0.113217673 | 5.295431597  | 7.98741104   | 2.603452154  |
| 5204 | -0.352108471 | -0.352108 | -0.352108471 | 7.807367533  | 7.759055388  | 7.78321146   |
| 5205 | -0.352108471 | -0.352108 | -0.352108471 | 3.611610995  | 2.43572631   | 1.259841624  |
| 5211 | -0.352108471 | -0.352108 | -0.352108471 | 7.193534033  | 5.958359385  | 4.723184736  |
| 5213 | 6.791250076  | 5.2849744 | 3.778698636  | -0.352108471 | -0.352108471 | -0.352108471 |
| 5214 | 5.251734074  | 6.1075388 | 6.963343528  | 2.676259628  | 3.245625856  | 3.814992084  |
| 5216 | 10.00821774  | 9.625261  | 10.39117453  | 10.93922092  | 11.66805155  | 12.39688219  |
| 5217 | -0.352108471 | -0.352108 | -0.352108471 | 7.247844574  | 9.073780563  | 5.421908585  |
| 5223 | 6.192721106  | 6.7884205 | 5.597021732  | 9.225619226  | 9.2266493    | 9.224589153  |
| 5225 | -0.352108471 | -0.352108 | -0.352108471 | 5.019784859  | 4.835573571  | 4.927679215  |
| 5226 | 6.097340265  | 7.4379278 | 6.767634029  | 7.232000306  | 3.764002741  | 10.69999787  |
| 5230 | 7.032080741  | 7.8683632 | 8.704645642  | 5.764169867  | 11.09742037  | 8.430795118  |
| 5238 | 3.249026237  | 3.1277379 | 3.006449514  | 10.71428473  | 2.958142906  | 6.836213819  |
| 5239 | -0.352108471 | -0.352108 | -0.352108471 | 4.160912369  | 7.05613052   | 5.608521445  |
| 5245 | 3.127737875  | 5.1441106 | 1.111365102  | 7.701266713  | 6.824147952  | 5.94702919   |
| 5250 | 7.178557834  | 6.0361971 | 6.607377459  | 8.468617801  | 8.625813758  | 8.783009714  |
| 5252 | 6.371895774  | 7.9626948 | 7.167295284  | 5.983736712  | 6.002308672  | 5.965164752  |
| 5253 | -0.352108471 | -0.352108 | -0.352108471 | 6.882935224  | 5.196367603  | 6.039651413  |
| 5260 | -0.352108471 | -0.352108 | -0.352108471 | 2.847531327  | 5.254689875  | 0.440372779  |
| 5261 | 4.107444797  | 5.3208399 | 6.534235073  | 6.808539879  | 4.150994655  | 9.466085104  |
| 5265 | 5.886342689  | 7.5242323 | 6.705287512  | -0.352108471 | -0.352108471 | -0.352108471 |
| 5269 | 7.505645306  | 8.1735045 | 6.837786161  | 6.719660678  | 6.859217306  | 6.998773933  |
| 5270 | 7.810989158  | 6.0421284 | 6.926558783  | -0.352108471 | -0.352108471 | -0.352108471 |
| 5272 | 7.59137116   | 11.821644 | 9.706507537  | 7.872706255  | 6.684472822  | 9.060939687  |
| 5284 | 5.640665475  | 8.2681409 | 6.954403191  | 5.629986024  | 7.253857091  | 6.441921558  |
| 5286 | 5.770125669  | 5.164715  | 5.467420327  | 0.795123807  | 2.282627613  | 1.53887571   |
| 5287 | 7.354597667  | 7.3165435 | 7.392651867  | 5.614696198  | 5.863245426  | 5.36614697   |



|      |              |           |              |              |              |              |
|------|--------------|-----------|--------------|--------------|--------------|--------------|
| 5290 | -0.352108471 | -0.352108 | -0.352108471 | 5.284974356  | 5.315258837  | 5.254689875  |
| 5293 | 7.082097045  | 5.9695814 | 8.194612669  | 7.013853304  | 7.785987102  | 8.5581209    |
| 5294 | -0.352108471 | -0.352108 | -0.352108471 | 6.165870606  | 5.39777579   | 6.933965422  |
| 5295 | 3.733364623  | 4.1125856 | 3.354143641  | 5.80449981   | 5.893442277  | 5.715557343  |
| 5296 | 4.872224191  | 4.8304259 | 4.914022459  | 7.055504668  | 7.082394844  | 7.028614492  |
| 5297 | 3.527916452  | 4.6365584 | 2.419274494  | 8.831052025  | 7.135075351  | 5.439098677  |
| 5298 | 4.781672039  | 6.5373837 | 8.29309541   | 8.471132781  | 6.039724911  | 7.255428846  |
| 5300 | 1.383520155  | -0.352108 | 3.119148782  | 7.605843994  | 7.690871547  | 7.520816442  |
| 5303 | -0.352108471 | -0.352108 | -0.352108471 | 3.51558363   | 1.535850263  | 2.525716947  |
| 5305 | 6.071865894  | 6.9400554 | 5.203676421  | -0.352108471 | -0.352108471 | -0.352108471 |
| 5306 | 5.958359385  | 7.4482421 | 4.468476637  | 1.223721097  | 0.995848332  | 1.451593862  |
| 5307 | 7.518238923  | 6.9819735 | 7.250106234  | 7.532560112  | 4.96994691   | 6.251253511  |
| 5310 | -0.352108471 | -0.352108 | -0.352108471 | 7.178522138  | 7.188109812  | 7.168934463  |
| 5311 | -0.352108471 | -0.352108 | -0.352108471 | 6.463674915  | 9.292499686  | 3.634850144  |
| 5313 | -0.352108471 | -0.352108 | -0.352108471 | 0.919601171  | 2.191310813  | -0.352108471 |
| 5314 | 6.151585628  | 5.1112032 | 7.19196804   | -0.352108471 | -0.352108471 | -0.352108471 |
| 5315 | 10.332086    | 10.934418 | 9.729754207  | 14.30542405  | 7.167065071  | 10.73624456  |
| 5316 | 5.435976872  | 7.0570382 | 6.24650753   | 7.332171714  | 6.810436227  | 6.28870074   |
| 5318 | 7.167210339  | 3.5069961 | 5.337103237  | 1.036211897  | 1.14221151   | 0.930212283  |
| 5326 | 3.291889437  | 4.8164356 | 4.054162528  | 7.082065508  | 5.249675704  | 6.165870606  |
| 5327 | 6.604151277  | 6.0999564 | 6.352053864  | 6.87108183   | 7.017138883  | 6.725024778  |
| 5328 | 6.145394489  | 7.4840181 | 8.822641756  | 5.926406398  | 9.765422725  | 7.845914561  |
| 5329 | 7.305341479  | 6.8482987 | 7.762384298  | 2.560532227  | 4.456886199  | 6.353240172  |
| 5331 | 8.804837621  | 4.1996884 | 6.502263028  | 6.915018431  | 6.039651413  | 5.164284396  |
| 5332 | 3.157474865  | 2.9079292 | 2.658383472  | -0.352108471 | -0.352108471 | -0.352108471 |
| 5333 | 6.763661796  | 6.2125362 | 5.661410622  | 0.874413692  | -0.352108471 | 2.100935855  |
| 5338 | 5.25880671   | 8.4349115 | 2.082701885  | -0.352108471 | -0.352108471 | -0.352108471 |
| 5339 | 2.58030114   | 4.4826926 | 6.385083978  | 9.365704316  | 7.954843384  | 8.66027385   |
| 5340 | 6.412258644  | 6.7508628 | 6.073654487  | -0.352108471 | -0.352108471 | -0.352108471 |
| 5347 | -0.352108471 | -0.352108 | -0.352108471 | 8.293428652  | 6.021986568  | 7.15770761   |
| 5351 | 4.60738245   | 10.040866 | 7.3241242    | 11.10338802  | 5.477029837  | 8.290208929  |
| 5352 | 7.587840561  | 6.0203811 | 4.452921622  | 7.915037632  | 5.512515172  | 6.713776402  |
| 5355 | 1.623552077  | 4.6319237 | 3.127737875  | 7.398851691  | 5.98922437   | 6.694038031  |
| 5358 | 7.17777694   | 10.260311 | 4.095242879  | 7.21467292   | 7.570408747  | 6.858937092  |
| 5361 | 4.13007001   | 7.4703296 | 5.800199788  | 4.357394898  | 7.31285726   | 10.26831962  |
| 5364 | -0.352108471 | -0.352108 | -0.352108471 | 0.357532875  | 2.242596918  | 4.127660961  |
| 5370 | 9.016629471  | 5.3382703 | 1.65991105   | 0.624614178  | 0.808855576  | 0.440372779  |
| 5371 | -0.352108471 | -0.352108 | -0.352108471 | 4.728824222  | 6.833207703  | 8.937591184  |
| 5372 | 2.170316103  | 4.8599664 | 3.515141236  | 6.341606863  | 6.309013498  | 6.32531018   |
| 5373 | 8.624887901  | 7.7303009 | 6.835713949  | -0.352108471 | -0.352108471 | -0.352108471 |
| 5376 | -0.352108471 | -0.352108 | -0.352108471 | 7.031973189  | 2.823385241  | 4.927679215  |
| 5387 | 5.152247113  | 4.2848981 | 6.019596136  | -0.352108471 | -0.352108471 | -0.352108471 |
| 5393 | -0.352108471 | -0.352108 | -0.352108471 | 6.931603315  | 6.762467494  | 6.847035404  |
| 5394 | -0.352108471 | -0.352108 | -0.352108471 | 5.821410838  | 5.825167992  | 5.817653684  |
| 5396 | -0.352108471 | -0.352108 | -0.352108471 | 5.903760504  | 5.926961306  | 5.880559702  |
| 5411 | 4.792303669  | 4.2336434 | 5.350963922  | 7.703335641  | 8.080426277  | 7.326245006  |
| 5420 | -0.352108471 | -0.352108 | -0.352108471 | 4.281527167  | 8.437013559  | 6.359270363  |



|      |              |           |              |              |              |              |
|------|--------------|-----------|--------------|--------------|--------------|--------------|
| 5425 | 3.417170858  | 8.1832287 | 5.800199788  | 4.377000921  | 7.763851867  | 6.070426394  |
| 5426 | -0.352108471 | -0.352108 | -0.352108471 | 3.943777666  | 8.77476306   | 6.359270363  |
| 5428 | -0.352108471 | -0.352108 | -0.352108471 | 3.051990852  | 2.310744036  | 2.681367444  |
| 5429 | 8.304267645  | 7.8941486 | 8.71438672   | 6.937347744  | 8.026049122  | 9.1147505    |
| 5430 | -0.352108471 | -0.352108 | -0.352108471 | 7.248377169  | 7.900165925  | 8.55195468   |
| 5432 | 7.207838162  | 7.2305473 | 7.18512902   | 6.747271561  | 6.773846551  | 6.720696571  |
| 5433 | 5.442901191  | 5.3190968 | 5.195292329  | 6.058470282  | 5.789762726  | 5.52105517   |
| 5434 | 5.288141214  | 4.617923  | 5.958359385  | 8.059969165  | 8.080147028  | 8.039791301  |
| 5435 | -0.352108471 | -0.352108 | -0.352108471 | 4.456886199  | 4.482692559  | 4.43107984   |
| 5437 | -0.352108471 | -0.352108 | -0.352108471 | 9.731841961  | 3.864410444  | 6.798126203  |
| 5438 | 4.449748927  | 3.9195059 | 4.979991919  | 5.651890859  | 5.715557343  | 5.588224375  |
| 5439 | -0.352108471 | -0.352108 | -0.352108471 | 6.016826565  | 7.109633208  | 6.563229887  |
| 5440 | -0.352108471 | -0.352108 | -0.352108471 | 6.423333563  | 6.109400825  | 6.266367194  |
| 5441 | 9.120851179  | 4.4827764 | 6.801813774  | 8.671586794  | 10.43870552  | 6.904468073  |
| 5442 | -0.352108471 | -0.352108 | -0.352108471 | 7.602246173  | 6.454600772  | 5.30695537   |
| 5450 | 7.028007245  | 8.317352  | 9.606696801  | 6.351947311  | 6.448016836  | 6.255877787  |
| 5451 | -0.352108471 | -0.352108 | -0.352108471 | 6.204656258  | 6.215464554  | 6.193847962  |
| 5452 | 5.304984318  | 10.155618 | 7.730300925  | -0.352108471 | -0.352108471 | -0.352108471 |
| 5455 | 4.501003242  | 3.6761388 | 5.325867653  | -0.352108471 | -0.352108471 | -0.352108471 |
| 5457 | -0.352108471 | -0.352108 | -0.352108471 | 5.821410838  | 4.658016069  | 6.984805607  |
| 5460 | 5.938226189  | 6.3911566 | 6.844087039  | 5.291399258  | 9.387988127  | 2.194810389  |
| 5464 | 5.174677258  | 5.0041471 | 5.089412202  | 5.838252145  | 1.331990457  | 3.585121301  |
| 5465 | 7.795308771  | 6.9285962 | 6.061883721  | 5.765361695  | 5.456715951  | 6.07400744   |
| 5467 | -0.352108471 | -0.352108 | -0.352108471 | 5.822181435  | 6.235921161  | 6.649660887  |
| 5468 | -0.352108471 | -0.352108 | -0.352108471 | 3.919505936  | 1.688015621  | 6.15099625   |
| 5469 | 5.852937462  | 3.7895619 | 7.91631301   | 4.08236011   | 3.33212945   | 4.832590771  |
| 5476 | 5.77543481   | 5.4748867 | 5.625160771  | 7.089075912  | 10.4504022   | 3.727749622  |
| 5478 | 8.678611829  | 7.1520816 | 10.20514208  | 9.776283733  | 10.27817108  | 10.78005843  |
| 5479 | -0.352108471 | -0.352108 | -0.352108471 | 8.967302913  | 10.30439902  | 7.630206805  |
| 5480 | 8.014817544  | 6.1215288 | 4.228239993  | 5.660889986  | 5.458255064  | 5.255620143  |
| 5481 | 8.541122289  | 5.8624411 | 7.201781675  | 5.001788697  | 9.230184491  | 0.773392903  |
| 5493 | 7.550097963  | 5.9002924 | 4.250486798  | 6.12990004   | 6.135204448  | 6.124595632  |
| 5494 | -0.352108471 | -0.352108 | -0.352108471 | 2.024343053  | 3.150546562  | 0.898139544  |
| 5495 | 6.818997529  | 7.5191776 | 8.219357611  | 4.199252247  | 7.976036662  | 6.087644454  |
| 5499 | 7.195397158  | 6.7871694 | 6.378941685  | 6.103340827  | 2.185039664  | 10.02164199  |
| 5500 | 6.644566078  | 6.7036917 | 6.674128879  | 6.767454127  | 7.340170719  | 7.912887311  |
| 5501 | 6.674128879  | 7.2614815 | 6.086776305  | 6.641653511  | 6.12990004   | 5.618146569  |
| 5507 | -0.352108471 | -0.352108 | -0.352108471 | 5.325716078  | 6.90025422   | 3.751177936  |
| 5510 | 5.800232101  | 9.1478499 | 7.474040996  | 6.276856601  | 6.023988658  | 6.529724543  |
| 5511 | -0.352108471 | -0.352108 | -0.352108471 | 5.597359463  | 6.296043865  | 6.994728267  |
| 5515 | 5.635328348  | 5.7419169 | 5.688622647  | 6.939378126  | 8.976101269  | 7.957739698  |
| 5516 | -0.352108471 | -0.352108 | -0.352108471 | 4.616936354  | 8.854623018  | 6.735779686  |
| 5518 | 7.221345935  | 6.1892291 | 6.705287512  | 8.166316988  | 7.959624489  | 8.373009486  |
| 5519 | 4.525021603  | 5.4729193 | 4.998970473  | 0.624614178  | 0.808855576  | 0.440372779  |
| 5520 | -0.352108471 | -0.352108 | -0.352108471 | 5.47633612   | 5.941971976  | 5.010700265  |
| 5524 | -0.352108471 | -0.352108 | -0.352108471 | 6.829307464  | 5.45223877   | 8.206376157  |
| 5525 | 4.018111536  | 8.4069609 | 6.212536209  | 1.601336827  | -0.352108471 | 3.554782125  |

|      |              |           |              |              |              |              |
|------|--------------|-----------|--------------|--------------|--------------|--------------|
| 5527 | -0.352108471 | -0.352108 | -0.352108471 | 6.800715119  | 5.523202497  | 8.07822774   |
| 5528 | -0.352108471 | -0.352108 | -0.352108471 | 7.346697058  | 7.593347686  | 7.100046429  |
| 5530 | -0.352108471 | -0.352108 | -0.352108471 | 6.596757815  | 6.617035395  | 6.576480236  |
| 5531 | -0.352108471 | -0.352108 | -0.352108471 | 6.7910439    | 6.619531124  | 6.705287512  |
| 5532 | 8.1532074    | 6.9527073 | 5.752207276  | 4.796479493  | 6.913488898  | 9.030498303  |
| 5533 | -0.352108471 | -0.352108 | -0.352108471 | 7.928212329  | 8.103616925  | 7.752807732  |
| 5534 | 4.528054005  | 5.980334  | 7.432614051  | -0.352108471 | -0.352108471 | -0.352108471 |
| 5536 | -0.352108471 | -0.352108 | -0.352108471 | 7.254409547  | 8.297316317  | 7.775862932  |
| 5537 | -0.352108471 | -0.352108 | -0.352108471 | 7.72540815   | 8.171122555  | 8.616836959  |
| 5538 | -0.352108471 | -0.352108 | -0.352108471 | 5.849605198  | 6.622237124  | 6.235921161  |
| 5546 | 7.347881921  | 6.2420483 | 5.136214637  | 8.783254855  | 7.203585592  | 7.993420223  |
| 5547 | -0.352108471 | -0.352108 | -0.352108471 | 3.422290724  | 5.923493182  | 8.42469564   |
| 5549 | 7.115369054  | 7.0314051 | 7.199333039  | 1.58479924   | 1.731739118  | 1.437859363  |
| 5550 | 7.377755134  | 8.0394819 | 6.716028359  | 1.563782278  | 5.910505782  | 3.73714403   |
| 5552 | 5.898613566  | 8.1246837 | 3.672543443  | 4.36512151   | 5.412561087  | 6.460000665  |
| 5562 | 6.715741874  | 7.878396  | 7.297068944  | 0.044132154  | -0.352108471 | 0.440372779  |
| 5566 | 5.798459316  | 5.873346  | 5.723572646  | 7.326356364  | 7.342696275  | 7.310016454  |
| 5567 | -0.352108471 | -0.352108 | -0.352108471 | 3.73714403   | 4.958117366  | 2.516170694  |
| 5571 | 6.242048279  | 5.2767044 | 7.207392127  | -0.352108471 | -0.352108471 | -0.352108471 |
| 5573 | 6.518125564  | 6.4864005 | 6.502263028  | 7.250957754  | 3.966958852  | 10.53495666  |
| 5575 | -0.352108471 | -0.352108 | -0.352108471 | 6.450302837  | 4.648100738  | 8.252504937  |
| 5578 | 7.143666534  | 6.9003452 | 6.657023947  | 7.012479653  | 5.838263192  | 6.425371423  |
| 5579 | 4.044792187  | 6.2465075 | 8.448222872  | 0.044132154  | 0.440372779  | -0.352108471 |
| 5580 | 6.396868383  | 6.4105853 | 6.383151496  | 4.977710418  | 5.054280952  | 4.901139884  |
| 5584 | 5.084523138  | 4.4715058 | 3.85848839   | 5.410465611  | 5.765983138  | 5.588224375  |
| 5585 | 5.688622647  | 5.236867  | 6.140378306  | 6.806576698  | 4.80208491   | 2.797593122  |
| 5589 | 6.310616952  | 6.1999612 | 6.421272681  | 8.301885534  | 8.320892968  | 8.2828781    |
| 5591 | 7.072259769  | 6.7640924 | 7.380427174  | 9.209701518  | 7.887166737  | 6.564631956  |
| 5592 | 5.217491139  | 5.2437595 | 5.191222747  | -0.352108471 | -0.352108471 | -0.352108471 |
| 5594 | 2.879090203  | 4.1511923 | 3.515141236  | 6.577483275  | 3.980594444  | 9.174372107  |
| 5595 | -0.352108471 | -0.352108 | -0.352108471 | 4.764823754  | 9.089053491  | 6.926938623  |
| 5597 | -0.352108471 | -0.352108 | -0.352108471 | 5.800199788  | 8.009687299  | 3.590712276  |
| 5601 | 8.562476809  | 6.898125  | 7.730300925  | 2.252618212  | 2.252618212  | 2.252618212  |
| 5603 | 9.08889005   | 8.3276006 | 7.566311181  | 5.590825591  | 5.427564391  | 5.754086791  |
| 5604 | 6.317834233  | 6.3439771 | 6.291691359  | -0.352108471 | -0.352108471 | -0.352108471 |
| 5605 | 7.143957189  | 7.515234  | 6.772680333  | 9.5924984    | 7.472973925  | 5.353449449  |
| 5606 | 7.03750086   | 8.5990222 | 7.818261523  | 8.401371506  | 6.574218611  | 10.2285244   |
| 5609 | 6.151585628  | 6.3748784 | 5.928292891  | 3.119148782  | 3.119148782  | 3.119148782  |
| 5610 | 5.587178629  | 5.7855384 | 5.388818875  | 1.167362396  | -0.352108471 | 2.686833264  |
| 5611 | 3.547436804  | 6.5235082 | 5.035472495  | 2.124237496  | 2.100935855  | 2.147539136  |
| 5612 | 6.242048279  | 4.0884897 | 8.39560684   | -0.352108471 | -0.352108471 | -0.352108471 |
| 5613 | 6.093476582  | 6.7884205 | 5.398532684  | 5.723485516  | 5.731413688  | 5.715557343  |
| 5616 | 3.960676558  | 3.6761388 | 4.245214285  | 1.968661759  | 1.997577452  | 1.939746065  |
| 5621 | 8.326761998  | 5.6082605 | 6.967511245  | 7.970671981  | 7.348693229  | 6.726714476  |
| 5625 | 4.107686153  | 6.056054  | 8.004421845  | -0.352108471 | -0.352108471 | -0.352108471 |
| 5631 | -0.352108471 | -0.352108 | -0.352108471 | 10.77213557  | 7.97624566   | 5.180355749  |
| 5635 | -0.352108471 | -0.352108 | -0.352108471 | 6.070043966  | 6.101634422  | 6.038453511  |

|      |              |           |              |              |              |              |
|------|--------------|-----------|--------------|--------------|--------------|--------------|
| 5648 | -0.352108471 | -0.352108 | -0.352108471 | 7.254608919  | 8.132937082  | 6.376280757  |
| 5649 | 4.830141517  | 5.3546856 | 5.879229781  | -0.352108471 | -0.352108471 | -0.352108471 |
| 5650 | 1.392109249  | 3.136327  | -0.352108471 | 5.118656602  | 6.04366503   | 4.193648173  |
| 5654 | 5.354685649  | 3.4663032 | 7.243068121  | 7.401312755  | 5.539204947  | 6.470258851  |
| 5660 | 8.089245536  | 6.789528  | 9.38896304   | 6.548133264  | 11.11040755  | 8.829270406  |
| 5669 | 6.147142694  | 6.7802071 | 6.463674915  | -0.352108471 | -0.352108471 | -0.352108471 |
| 5672 | 7.31614654   | 6.0629293 | 6.689537938  | 7.099706219  | 7.109037535  | 7.090374904  |
| 5673 | 1.946552907  | 3.3296045 | 0.56350129   | 3.320702002  | 2.629898059  | 4.011505944  |
| 5676 | 2.830693931  | 0.9297832 | 1.880238567  | 6.128600107  | 7.418881452  | 6.77374078   |
| 5678 | 6.26796092   | 7.7405013 | 7.004231132  | 2.650522147  | 4.621880905  | 0.679163388  |
| 5681 | 0.206100132  | 1.3921092 | 2.578118366  | 6.829307464  | 7.617792651  | 6.040822276  |
| 5682 | 5.749402114  | 7.3447591 | 4.154045119  | 7.214853916  | 7.889819055  | 8.564784194  |
| 5683 | 1.681008233  | 3.5151412 | 5.349274238  | 8.656819156  | 9.733593924  | 7.580044388  |
| 5684 | 6.090808341  | 4.829477  | 7.352139653  | 6.179989181  | 6.782044062  | 7.384098943  |
| 5685 | -0.352108471 | -0.352108 | -0.352108471 | 5.357748126  | 9.677593766  | 7.517670946  |
| 5686 | 1.383520155  | -0.352108 | 3.119148782  | 10.23653294  | 3.027159563  | 6.631846251  |
| 5687 | -0.352108471 | -0.352108 | -0.352108471 | 5.333331364  | 4.449748927  | 3.566166491  |
| 5688 | 6.463674915  | 6.479333  | 6.448016836  | 6.926938623  | 6.946414218  | 6.907463027  |
| 5689 | -0.352108471 | -0.352108 | -0.352108471 | 6.866118875  | 6.820702064  | 6.775285253  |
| 5690 | 6.729573474  | 6.3989203 | 6.068267173  | 7.57353257   | 8.40002958   | 9.226526591  |
| 5691 | -0.352108471 | -0.352108 | -0.352108471 | 4.79472922   | 3.253077834  | 6.336380607  |
| 5692 | 7.398193617  | 4.7668679 | 10.02951931  | -0.352108471 | -0.352108471 | -0.352108471 |
| 5693 | -0.352108471 | -0.352108 | -0.352108471 | 3.357516707  | 6.087644454  | 8.817772202  |
| 5694 | -0.352108471 | -0.352108 | -0.352108471 | 6.739878825  | 5.856478714  | 7.623278936  |
| 5695 | 7.932742872  | 7.3826486 | 8.482837134  | 5.257632347  | 8.635028156  | 6.946330252  |
| 5696 | 4.178899946  | 2.9191374 | 5.438662516  | 4.08236011   | 4.245214285  | 3.919505936  |
| 5697 | 2.894657322  | 0.5657008 | 5.223613834  | -0.352108471 | -0.352108471 | -0.352108471 |
| 5699 | 6.735779686  | 7.0156808 | 6.455878557  | 5.918018286  | 5.663737322  | 5.409456357  |
| 5700 | 5.197387513  | 6.4978691 | 5.847628321  | 6.266367194  | 5.382807782  | 7.149926605  |
| 5702 | -0.352108471 | -0.352108 | -0.352108471 | 7.332349758  | 7.829997332  | 8.327644905  |
| 5704 | 6.463674915  | 6.1497094 | 6.777640385  | 4.80208491   | 5.263461501  | 4.340708319  |
| 5705 | 9.3962061    | 5.9987621 | 7.697484075  | 5.049594135  | 5.494417177  | 5.939240219  |
| 5706 | 6.090808341  | 4.9036944 | 7.277922313  | 8.097708198  | 6.671874638  | 5.246041078  |
| 5707 | -0.352108471 | -0.352108 | -0.352108471 | 6.183918153  | 7.643059643  | 6.913488898  |
| 5708 | 8.699804973  | 7.2980036 | 7.998904298  | 5.964300094  | 9.170805021  | 7.567552558  |
| 5709 | 7.296464716  | 7.3154815 | 7.277447884  | 7.271069954  | 7.29520141   | 7.246938498  |
| 5710 | 4.933668324  | 6.6150723 | 5.774370319  | 6.266658347  | 7.117815169  | 7.968971991  |
| 5711 | 1.392109249  | 3.136327  | -0.352108471 | 6.266367194  | 6.276856601  | 6.255877787  |
| 5713 | 6.044283763  | 5.8529375 | 5.66159116   | 5.250920127  | 7.220922195  | 6.235921161  |
| 5714 | 3.515141236  | 3.6761388 | 3.354143641  | 8.520420514  | 6.838620913  | 7.679520714  |
| 5715 | -0.352108471 | -0.352108 | -0.352108471 | 7.463736672  | 9.264017869  | 5.663455476  |
| 5718 | 8.321094611  | 9.0310484 | 7.611140868  | 3.782624606  | 9.205635116  | 6.494129861  |
| 5720 | 7.509846649  | 6.4737434 | 6.991795048  | 6.027163813  | 9.707390128  | 7.867276971  |
| 5723 | 9.919831855  | 8.3510264 | 6.78222101   | 5.976946737  | 4.510937597  | 5.243942167  |
| 5724 | 8.469475329  | 5.451894  | 6.960684686  | 6.240522534  | 5.688622647  | 5.136722276  |
| 5725 | 8.744320385  | 8.8322984 | 8.656342398  | 7.649062677  | 7.682866779  | 7.615258575  |
| 5728 | 2.563219874  | 2.5421313 | 2.563214568  | -0.352108471 | -0.352108471 | -0.352108471 |

|      |              |           |              |              |              |              |
|------|--------------|-----------|--------------|--------------|--------------|--------------|
| 5730 | -0.352108471 | -0.352108 | -0.352108471 | 5.760537073  | 6.840168031  | 4.680906115  |
| 5731 | -0.352108471 | -0.352108 | -0.352108471 | 4.471069827  | 4.956774616  | 4.713922221  |
| 5732 | 2.613734404  | 5.4283939 | 8.243053345  | -0.352108471 | -0.352108471 | -0.352108471 |
| 5734 | 5.089412202  | 6.0490699 | 4.12975451   | -0.352108471 | -0.352108471 | -0.352108471 |
| 5739 | -0.352108471 | -0.352108 | -0.352108471 | 5.126019982  | 4.80208491   | 4.478149838  |
| 5740 | 6.777690144  | 8.6226362 | 7.700163162  | 5.409216477  | 3.283814455  | 7.534618499  |
| 5742 | -0.352108471 | -0.352108 | -0.352108471 | 7.272749174  | 5.575983727  | 3.879218279  |
| 5745 | -0.352108471 | -0.352108 | -0.352108471 | 6.415928975  | 6.429470164  | 6.402387785  |
| 5747 | -0.352108471 | -0.352108 | -0.352108471 | 1.97329804   | 3.585121301  | 5.196944563  |
| 5756 | -0.352108471 | -0.352108 | -0.352108471 | 6.774697242  | 8.851930875  | 7.813314058  |
| 5757 | 11.05028427  | 8.5013948 | 9.775839531  | 9.13101167   | 8.556134392  | 9.705888947  |
| 5763 | 11.04742197  | 10.409557 | 9.771692401  | 10.14646054  | 8.59821042   | 11.69471066  |
| 5768 | 8.694577421  | 6.8354301 | 4.976282689  | 7.753639915  | 8.998169197  | 8.375904556  |
| 5770 | -0.352108471 | -0.352108 | -0.352108471 | 3.119021332  | 2.381862494  | 3.856180171  |
| 5780 | -0.352108471 | -0.352108 | -0.352108471 | 5.663737322  | 6.690311581  | 4.637163062  |
| 5783 | -0.352108471 | -0.352108 | -0.352108471 | 6.110765987  | 8.413620395  | 7.262193191  |
| 5786 | 8.182202312  | 4.1857257 | 6.183964016  | -0.352108471 | -0.352108471 | -0.352108471 |
| 5793 | -0.352108471 | -0.352108 | -0.352108471 | 6.12990004   | 5.616968343  | 6.642831737  |
| 5795 | 4.097886718  | 6.3370956 | 5.217491139  | 6.955144685  | 0.883867186  | 3.919505936  |
| 5797 | -0.352108471 | -0.352108 | -0.352108471 | 4.884033187  | 6.637040959  | 5.760537073  |
| 5802 | 6.48561815   | 8.5869477 | 7.536282912  | -0.352108471 | -0.352108471 | -0.352108471 |
| 5806 | 6.242048279  | 4.9383841 | 7.545712418  | 5.916834063  | 5.169157826  | 4.421481588  |
| 5810 | 7.079753946  | 7.3836613 | 7.687568675  | 3.617543668  | 5.955959659  | 4.29437565   |
| 5814 | 7.691549379  | 7.3327669 | 8.050331905  | 6.899457994  | 7.109037535  | 6.689878453  |
| 5817 | 7.764328239  | 7.507402  | 8.021254448  | 7.122286018  | 7.236989963  | 7.007582074  |
| 5819 | 6.070200859  | 6.8231808 | 6.446690805  | 6.758753021  | 7.952329552  | 5.56517649   |
| 5820 | 4.26871449   | 4.617923  | 3.919505936  | 5.775068216  | 5.804293869  | 5.745842563  |
| 5824 | 7.927924624  | 6.7357797 | 5.543634748  | 5.760537073  | 5.775231583  | 5.745842563  |
| 5826 | 5.354685649  | 5.3835036 | 5.325867653  | 0.440372779  | 0.440372779  | 0.440372779  |
| 5828 | 3.196680244  | 4.798745  | 6.400809669  | 6.144107     | 5.117340897  | 4.090574795  |
| 5829 | 9.645743308  | 7.4834077 | 5.321072042  | 9.225836049  | 5.215846118  | 7.220841083  |
| 5830 | -0.352108471 | -0.352108 | -0.352108471 | 8.722680124  | 6.926938623  | 5.131197122  |
| 5831 | -0.352108471 | -0.352108 | -0.352108471 | 2.274515706  | -0.352108471 | 4.901139884  |
| 5832 | -0.352108471 | -0.352108 | -0.352108471 | 6.913488898  | 6.926801914  | 6.900175883  |
| 5833 | -0.352108471 | -0.352108 | -0.352108471 | 1.902694985  | 6.455104906  | 4.178899946  |
| 5834 | 6.183964016  | 5.4749131 | 6.89301491   | 9.81208411   | 7.37970607   | 4.94732803   |
| 5836 | -0.352108471 | -0.352108 | -0.352108471 | 7.066165076  | 6.266367194  | 5.466569311  |
| 5837 | -0.352108471 | -0.352108 | -0.352108471 | 3.879139969  | 7.395453388  | 5.637296679  |
| 5860 | 2.492871856  | 5.8529375 | 9.213003067  | 2.826082037  | 1.362108442  | 4.290055631  |
| 5861 | -0.352108471 | -0.352108 | -0.352108471 | 6.34460976   | 9.171006954  | 7.757808357  |
| 5862 | 7.004231132  | 4.7646761 | 9.243786148  | -0.352108471 | -0.352108471 | -0.352108471 |
| 5863 | 2.313941724  | 4.9799919 | -0.352108471 | -0.352108471 | -0.352108471 | -0.352108471 |
| 5865 | 8.974643259  | 6.3002    | 7.63742161   | 7.220185319  | 6.381272668  | 5.542360017  |
| 5867 | 3.515141236  | 3.6761388 | 3.354143641  | 1.167362396  | -0.352108471 | 2.686833264  |
| 5869 | 7.616245176  | 8.7833521 | 6.449138221  | 7.596690814  | 7.311506909  | 7.026323003  |
| 5870 | 6.778248209  | 6.4027684 | 6.590508304  | 5.756733586  | 6.087644454  | 6.418555323  |
| 5872 | 7.286324647  | 7.2952014 | 7.277447884  | 6.225217789  | 6.135204448  | 6.31523113   |

|      |              |           |              |              |              |              |
|------|--------------|-----------|--------------|--------------|--------------|--------------|
| 5873 | 8.945067903  | 7.7599784 | 8.352523148  | 5.38675695   | 7.948074799  | 2.825439102  |
| 5874 | -0.352108471 | -0.352108 | -0.352108471 | 2.686833264  | 2.686833264  | 2.686833264  |
| 5876 | -0.352108471 | -0.352108 | -0.352108471 | 7.892802136  | 5.688622647  | 3.484443158  |
| 5877 | -0.352108471 | -0.352108 | -0.352108471 | 4.016045771  | 5.109937633  | 2.922153909  |
| 5878 | 6.79254856   | 5.0858359 | 5.939192221  | 8.707312022  | 7.230904119  | 5.754496216  |
| 5879 | 8.18875661   | 5.8447962 | 7.016776417  | 7.222175024  | 8.725607015  | 10.22903901  |
| 5880 | -0.352108471 | -0.352108 | -0.352108471 | 5.983736712  | 6.404640822  | 5.562832602  |
| 5883 | 5.395440136  | 5.1110414 | 5.253240792  | -0.352108471 | -0.352108471 | -0.352108471 |
| 5884 | 2.412645809  | 6.1320496 | 9.851453467  | -0.352108471 | -0.352108471 | -0.352108471 |
| 5885 | -0.352108471 | -0.352108 | -0.352108471 | 3.919505936  | -0.141682854 | 7.980694725  |
| 5886 | -0.352108471 | -0.352108 | -0.352108471 | 6.99529589   | 6.946414218  | 7.044177561  |
| 5887 | 5.079283667  | 5.3152588 | 4.843308497  | 9.358979356  | 6.644415048  | 8.001697202  |
| 5888 | 5.369412555  | 4.8745632 | 4.396587441  | -0.352108471 | -0.352108471 | -0.352108471 |
| 5894 | -0.352108471 | -0.352108 | -0.352108471 | 7.741995652  | 6.693937107  | 5.645878563  |
| 5897 | 3.711299307  | 5.4283939 | 7.145488441  | -0.352108471 | -0.352108471 | -0.352108471 |
| 5898 | 3.515141236  | 3.6761388 | 3.354143641  | 4.583163537  | 7.003799972  | 9.424436408  |
| 5899 | 7.714641217  | 7.7464157 | 7.682866779  | 6.822208827  | 6.841511354  | 6.802906299  |
| 5900 | -0.352108471 | -0.352108 | -0.352108471 | 7.87032243   | 6.240686905  | 7.055504668  |
| 5901 | 8.347852706  | 6.6134726 | 10.08223276  | 10.2000135   | 6.99162151   | 8.595817505  |
| 5902 | 6.705287512  | 8.26244   | 5.148135068  | 6.056053999  | 6.484242908  | 5.627865089  |
| 5903 | -0.352108471 | -0.352108 | -0.352108471 | 6.570965708  | 5.345753061  | 5.958359385  |
| 5905 | 4.197727899  | 8.5405853 | 6.369156591  | 6.710202988  | 7.772256866  | 8.834310744  |
| 5906 | 4.417353062  | 5.7155573 | 3.119148782  | 5.78865122   | 5.731413688  | 5.845888751  |
| 5908 | 5.520811398  | 5.8703726 | 5.695591985  | 7.451058303  | 10.3295579   | 4.572558707  |
| 5911 | -0.352108471 | -0.352108 | -0.352108471 | 6.165870606  | 6.103069589  | 6.228671623  |
| 5912 | 4.178899946  | 4.1125856 | 4.245214285  | 6.836213819  | 6.859202315  | 6.813225323  |
| 5914 | 1.383520155  | -0.352108 | 3.119148782  | 5.939192221  | 5.958359385  | 5.920025058  |
| 5915 | 1.66201518   | 1.0528134 | 2.271216921  | 2.558363117  | 2.846251358  | 2.270474876  |
| 5916 | -0.352108471 | -0.352108 | -0.352108471 | 3.786680653  | 5.88700099   | 7.987321327  |
| 5917 | 6.14338204   | 6.4142581 | 6.685134231  | 4.95129188   | 4.3688235    | 4.66005769   |
| 5919 | -0.352108471 | -0.352108 | -0.352108471 | 3.010220895  | 3.919505936  | 2.100935855  |
| 5921 | 6.502263028  | 6.9508371 | 6.053688954  | -0.352108471 | -0.352108471 | -0.352108471 |
| 5922 | 2.989737274  | 4.9470072 | 6.904277104  | -0.352108471 | -0.352108471 | -0.352108471 |
| 5925 | 1.569874521  | 1.2365987 | 1.21542145   | -0.352108471 | -0.352108471 | -0.352108471 |
| 5928 | 3.559920336  | 6.7206321 | 5.140276207  | 5.145863224  | 5.669407383  | 6.192951543  |
| 5929 | 7.216041095  | 7.1753677 | 7.134694261  | 6.113562147  | 8.30460032   | 7.209081234  |
| 5931 | -0.352108471 | -0.352108 | -0.352108471 | 9.218546465  | 3.926800265  | 6.572673365  |
| 5932 | 3.805664353  | 2.3524222 | 5.258906487  | 6.243037448  | 6.296043865  | 6.349050283  |
| 5933 | 7.659808125  | 6.5493574 | 8.770258851  | 4.857983236  | 6.492651928  | 4.175317582  |
| 5935 | 7.753479539  | 8.7047121 | 6.802246986  | 8.089784342  | 6.438826876  | 7.264305609  |
| 5937 | 6.705287512  | 6.7206966 | 6.689878453  | 5.88700099   | 5.893442277  | 5.880559702  |
| 5939 | 9.467246631  | 8.6421827 | 10.29231054  | 8.721480187  | 6.60898181   | 7.665230999  |
| 5954 | 7.607131056  | 7.6448941 | 7.569368047  | 8.881957636  | 11.88274223  | 5.881173041  |
| 5955 | -0.352108471 | -0.352108 | -0.352108471 | 7.604813664  | 7.629372342  | 7.580254986  |
| 5962 | -0.352108471 | -0.352108 | -0.352108471 | 4.41128052   | 6.165870606  | 7.920460692  |
| 5966 | 4.184097316  | 5.1507818 | 6.117466246  | 1.0954352    | 1.58479924   | 2.074163281  |
| 5967 | 4.501003242  | 3.6761388 | 5.325867653  | -0.352108471 | -0.352108471 | -0.352108471 |

|      |              |           |              |              |              |              |
|------|--------------|-----------|--------------|--------------|--------------|--------------|
| 5969 | 4.368823643  | 5.3835036 | 3.354143641  | -0.352108471 | -0.352108471 | -0.352108471 |
| 5970 | -0.352108471 | -0.352108 | -0.352108471 | 7.221207448  | 5.723485516  | 4.225763583  |
| 5971 | -0.352108471 | -0.352108 | -0.352108471 | 4.80208491   | 4.637102219  | 4.967067602  |
| 5976 | -0.352108471 | -0.352108 | -0.352108471 | 5.01942989   | 7.881175785  | 6.450302837  |
| 5977 | 5.940304865  | 5.8529375 | 5.765570058  | 7.577703846  | 4.161627183  | 5.869665514  |
| 5979 | 3.234787761  | 1.7283626 | 2.481575183  | -0.352108471 | -0.352108471 | -0.352108471 |
| 5980 | 6.314875728  | 6.3681558 | 6.421435859  | -0.352108471 | -0.352108471 | -0.352108471 |
| 5981 | -0.352108471 | -0.352108 | -0.352108471 | 5.911756406  | 6.859217306  | 7.806678205  |
| 5982 | 7.419011579  | 9.0916667 | 5.746356464  | 7.338535707  | 6.630725721  | 6.984630714  |
| 5986 | -0.352108471 | -0.352108 | -0.352108471 | 4.297639083  | 4.561390363  | 4.033887802  |
| 5987 | -0.352108471 | -0.352108 | -0.352108471 | 7.530018305  | 7.309496697  | 7.419757501  |
| 5989 | 6.932408367  | 4.6679912 | 5.800199788  | 5.596916991  | 5.605609608  | 5.588224375  |
| 5992 | 3.011719947  | 2.4512907 | 1.890861457  | -0.352108471 | -0.352108471 | -0.352108471 |
| 5997 | -0.352108471 | -0.352108 | -0.352108471 | 4.927679215  | 8.20335113   | 1.6520073    |
| 5998 | -0.352108471 | -0.352108 | -0.352108471 | 5.923493182  | 3.838174394  | 8.008811971  |
| 5999 | 5.749402114  | 3.3072346 | 8.19156966   | -0.352108471 | -0.352108471 | -0.352108471 |
| 6001 | 7.17777694   | 9.4899576 | 4.86559632   | 6.519616277  | 5.689242659  | 6.104429468  |
| 6002 | 6.383199651  | 5.3920614 | 4.400923066  | 1.618250677  | 2.686833264  | 3.75541585   |
| 6007 | 6.644015295  | 6.5365333 | 6.429051302  | 5.178880455  | 3.968518095  | 6.389242815  |
| 6009 | -0.352108471 | -0.352108 | -0.352108471 | 7.036396027  | 7.044177561  | 7.028614492  |
| 6015 | -0.352108471 | -0.352108 | -0.352108471 | 6.796400047  | 7.776249247  | 7.286324647  |
| 6016 | 3.228537319  | 3.5996124 | 3.41407487   | 5.44897977   | 5.685576344  | 5.212383197  |
| 6023 | -0.352108471 | -0.352108 | -0.352108471 | 6.488107881  | 5.141882827  | 7.834332935  |
| 6029 | 4.978979723  | 6.0384535 | 3.919505936  | 6.084917755  | 5.191222747  | 6.978612763  |
| 6046 | 8.400533141  | 7.6071311 | 6.813728971  | 1.117721484  | 1.305230684  | 0.930212283  |
| 6047 | -0.352108471 | -0.352108 | -0.352108471 | 6.12990004   | 8.990180204  | 3.269619876  |
| 6048 | -0.352108471 | -0.352108 | -0.352108471 | 8.544945343  | 4.454114295  | 6.499529819  |
| 6050 | 7.010716847  | 6.1956255 | 7.82580823   | 8.284444579  | 6.052042882  | 10.51684628  |
| 6051 | 6.507929727  | 6.4636749 | 6.419420103  | 0.793818797  | -0.352108471 | 1.939746065  |
| 6059 | -0.352108471 | -0.352108 | -0.352108471 | 6.816905042  | 6.845389604  | 6.788420481  |
| 6091 | -0.352108471 | -0.352108 | -0.352108471 | 1.946552907  | 4.245214285  | -0.352108471 |
| 6092 | 2.65059567   | 2.7500141 | 2.551177233  | -0.352108471 | -0.352108471 | -0.352108471 |
| 6093 | 3.691501207  | 4.0160458 | 4.340590335  | 5.958359385  | 2.972934177  | 8.943784592  |
| 6095 | 5.160932683  | 6.0908083 | 7.020683998  | -0.352108471 | -0.352108471 | -0.352108471 |
| 6102 | 4.520973298  | 3.6349643 | 5.406982273  | 7.068740219  | 5.749166302  | 8.388314137  |
| 6117 | 3.515141236  | 3.8489845 | 3.181297931  | 4.869149724  | 5.406707798  | 5.944265872  |
| 6118 | -0.352108471 | -0.352108 | -0.352108471 | 2.31950733   | 5.233567424  | 8.147627517  |
| 6122 | 11.58370674  | 9.9382481 | 8.292789555  | 9.965836102  | 10.22803011  | 9.703642094  |
| 6124 | 8.799531962  | 9.1191351 | 9.438738218  | 8.660472311  | 10.14102893  | 11.62158555  |
| 6125 | 10.00003003  | 10.649152 | 9.350907897  | 7.299135817  | 10.34595789  | 8.822546856  |
| 6128 | 9.863325634  | 9.1867852 | 10.53986605  | 6.586953039  | 9.577397725  | 12.56784241  |
| 6129 | 8.964463113  | 8.7148846 | 9.214041644  | 10.69623159  | 6.377349406  | 8.5367905    |
| 6130 | 9.679800881  | 6.9431942 | 12.41640758  | 8.876480624  | 9.910622579  | 10.94476453  |
| 6132 | 9.372379889  | 9.7706862 | 10.16899256  | 9.735397181  | 10.5650861   | 10.15024164  |
| 6133 | 7.042523083  | 7.0441776 | 7.040868605  | 8.776996002  | 8.779674384  | 8.77431762   |
| 6134 | 9.518807513  | 8.8802716 | 10.15734345  | 9.100666434  | 9.823746577  | 10.54682672  |
| 6135 | 9.582998077  | 11.04043  | 8.125565805  | 9.607901601  | 8.770959505  | 9.189430553  |



|      |              |           |              |              |              |              |
|------|--------------|-----------|--------------|--------------|--------------|--------------|
| 6136 | 9.225777076  | 8.4473211 | 7.668865066  | 9.497516577  | 10.56355516  | 8.431477994  |
| 6137 | 10.31260281  | 10.527327 | 10.41996502  | 10.6671273   | 9.069370303  | 12.26488429  |
| 6138 | 8.414326396  | 8.4583909 | 8.370261881  | 9.775434224  | 9.78174292   | 9.769125527  |
| 6139 | 6.872070602  | 6.7380116 | 6.805041124  | 8.505185291  | 8.312490055  | 8.697880528  |
| 6141 | 8.582055395  | 6.98769   | 7.784872705  | 8.635621212  | 8.678966888  | 8.65729405   |
| 6142 | 9.412559271  | 9.9797034 | 8.845415182  | 10.60319195  | 9.879198478  | 11.32718541  |
| 6143 | 7.31927011   | 8.5918166 | 7.955543336  | 10.82619776  | 8.179807787  | 9.503002771  |
| 6144 | 8.39909175   | 8.4388724 | 8.359311122  | 9.069238097  | 9.099093789  | 9.039382405  |
| 6146 | 7.858118037  | 7.0113718 | 8.704864224  | 9.693205037  | 8.902554856  | 8.111904675  |
| 6147 | 7.856625788  | 10.105839 | 5.607412747  | 9.815889992  | 10.53626571  | 9.095514279  |
| 6150 | 6.695550336  | 6.6204961 | 6.658023207  | 4.092726653  | 3.119148782  | 5.066304524  |
| 6152 | 8.516595168  | 8.5400828 | 8.493107512  | 9.469109208  | 9.440152969  | 9.498065447  |
| 6154 | 7.401120142  | 7.2780304 | 7.154940626  | 11.3085261   | 9.463758151  | 7.618990198  |
| 6155 | 10.37638101  | 7.5519911 | 8.964186059  | 8.267948681  | 9.604109366  | 10.94027005  |
| 6156 | 7.98291635   | 6.4624076 | 7.222661978  | 8.698082551  | 9.057717404  | 9.417352256  |
| 6157 | 7.533336972  | 5.0992002 | 9.967473748  | 11.64690099  | 6.963077234  | 9.304989114  |
| 6158 | 7.917256534  | 10.016216 | 12.11517522  | 9.426705004  | 9.865130755  | 9.645917879  |
| 6159 | 9.503834851  | 7.8429568 | 11.16471291  | 10.27491064  | 6.346208053  | 14.20361324  |
| 6160 | 9.134043485  | 8.6496871 | 9.618399839  | 9.446218349  | 11.35803936  | 7.534397342  |
| 6161 | 10.54749483  | 8.4384159 | 6.329336959  | 10.66246074  | 9.732999246  | 10.19773     |
| 6164 | 7.820805959  | 8.1843568 | 8.547907596  | 10.82866414  | 8.55232631   | 6.275988483  |
| 6165 | 7.819969389  | 8.3631259 | 8.906282394  | 8.908454609  | 8.11940121   | 9.697508008  |
| 6166 | 6.135286094  | 5.4937832 | 4.852280336  | 9.009854107  | 7.405964559  | 8.207909333  |
| 6167 | 8.700400674  | 9.1544527 | 8.246348608  | 9.694045641  | 9.606348362  | 9.78174292   |
| 6168 | 10.47409317  | 9.7981601 | 9.122226932  | 8.870655037  | 10.72281321  | 7.018496865  |
| 6169 | 2.628412179  | 10.6193   | 6.623855918  | 7.963843178  | 8.423814496  | 8.883785814  |
| 6170 | 8.14876014   | 8.7588381 | 8.453799139  | 11.37095336  | 9.061513073  | 6.752072787  |
| 6171 | 10.0568025   | 10.555879 | 9.557725821  | 9.525471912  | 10.55302715  | 11.58058239  |
| 6173 | 2.351086241  | 1.5977964 | 3.104376103  | 6.857425346  | 5.517552795  | 6.187489071  |
| 6175 | 11.12426785  | 8.8454367 | 9.984852293  | 10.25364993  | 8.335013437  | 12.17228643  |
| 6176 | 9.886726279  | 10.243797 | 10.60086841  | 10.37003732  | 10.67524021  | 10.06483443  |
| 6181 | 8.040517613  | 8.0660974 | 8.014937823  | 9.182422154  | 9.146863799  | 9.21798051   |
| 6182 | 7.062915477  | 4.7376693 | 5.90029238   | 7.821918011  | 7.331272742  | 6.840627473  |
| 6183 | -0.352108471 | -0.352108 | -0.352108471 | 7.148009044  | 7.149537332  | 7.146480757  |
| 6184 | 4.860692968  | 5.9960948 | 5.428393874  | 5.290194195  | 9.657759536  | 7.473976865  |
| 6185 | -0.352108471 | -0.352108 | -0.352108471 | 6.919361747  | 5.780345578  | 8.058377915  |
| 6187 | 11.14659317  | 9.4191061 | 10.28284962  | 9.741734302  | 10.84978508  | 11.95783586  |
| 6188 | 9.387722965  | 8.8639222 | 8.340121533  | 8.812325416  | 10.39050274  | 9.601414078  |
| 6189 | 8.686519674  | 9.7617848 | 7.611254501  | 9.293477065  | 8.25213417   | 10.33481996  |
| 6191 | 8.324919686  | 9.2489934 | 7.400845997  | 8.987543758  | 8.024492115  | 9.9505954    |
| 6193 | 8.587823739  | 8.5865437 | 8.589103829  | 9.234305479  | 9.235285343  | 9.233325615  |
| 6194 | 6.680999206  | 8.4889268 | 10.29685444  | 8.475393846  | 10.11938028  | 9.297387062  |
| 6196 | 5.172336182  | 5.5370351 | 5.354685649  | 2.38621749   | 5.124543452  | -0.352108471 |
| 6198 | 3.058761005  | 2.8031255 | 2.547489908  | -0.352108471 | -0.352108471 | -0.352108471 |
| 6199 | -0.352108471 | -0.352108 | -0.352108471 | 3.245625856  | 4.549853921  | 1.941397791  |
| 6201 | 8.177335428  | 7.8444622 | 8.510208661  | 9.693616298  | 9.106169981  | 8.518723663  |
| 6202 | 5.773762627  | 8.105981  | 6.939871798  | 9.732888763  | 7.749880648  | 11.71589688  |

|      |              |           |              |              |              |              |
|------|--------------|-----------|--------------|--------------|--------------|--------------|
| 6203 | 9.038224509  | 7.9993398 | 10.07710918  | 9.912986202  | 11.60608284  | 8.21988956   |
| 6204 | 6.464069271  | 6.6429094 | 6.821749506  | 5.945093434  | 7.377124155  | 8.809154876  |
| 6205 | 9.164371527  | 10.361543 | 7.967200474  | 9.825041112  | 10.77911315  | 8.87096908   |
| 6206 | 7.321960058  | 8.881218  | 10.44047599  | 8.738089432  | 8.608832687  | 8.867346176  |
| 6207 | 1.199878824  | 5.0555969 | 3.127737875  | 7.195218384  | 8.983973515  | 8.089595949  |
| 6208 | 6.960561228  | 10.847806 | 8.90418384   | 8.853476829  | 9.519491262  | 8.187462395  |
| 6209 | 9.28357144   | 9.2807862 | 9.286356696  | 8.618513237  | 8.619270255  | 8.617756219  |
| 6210 | 8.077078623  | 7.636173  | 7.856625788  | 9.906218468  | 8.679356586  | 7.452494703  |
| 6217 | 4.550307802  | 5.9216036 | 3.179012034  | 7.889583011  | 9.212323673  | 10.53506434  |
| 6218 | 9.098135288  | 8.668575  | 8.239014714  | 9.863325634  | 9.232999971  | 10.4936513   |
| 6222 | 9.089819636  | 9.0769458 | 9.102693505  | 9.779344077  | 9.80105521   | 9.757632943  |
| 6223 | 11.70152004  | 9.3029401 | 10.50223007  | 11.63411304  | 9.925774412  | 8.217435784  |
| 6224 | 7.307996819  | 9.2417756 | 8.27488623   | 11.46247863  | 7.764834804  | 4.067190983  |
| 6227 | 4.428068644  | 4.6929891 | 4.957909594  | 8.963997453  | 11.8412019   | 6.086793006  |
| 6228 | 7.897268052  | 7.9270228 | 7.867513291  | 9.610255777  | 9.606348362  | 9.614163193  |
| 6229 | 8.97702576   | 8.8905959 | 9.063455621  | 9.641057557  | 9.631056556  | 9.651058557  |
| 6230 | 8.466440998  | 8.4166969 | 8.516185087  | 9.105466455  | 9.076945767  | 9.133987144  |
| 6232 | 8.335824565  | 7.9923409 | 8.679308186  | 11.34399961  | 9.284554373  | 7.225109134  |
| 6233 | 8.105367245  | 6.8312892 | 5.55721117   | 8.50066116   | 6.751080379  | 10.25024194  |
| 6234 | 4.544082676  | 8.4604434 | 6.502263028  | 7.488209285  | 7.820497371  | 8.152785456  |
| 6235 | 4.116251281  | 6.0079044 | 5.062077834  | 5.128697496  | 8.863128384  | 6.99591294   |
| 6237 | 4.692989119  | 5.6588605 | 7.727117712  | 3.134000228  | 4.078372564  | 4.022744899  |
| 6238 | 7.198930368  | 6.2125362 | 5.22614205   | 1.873849414  | 0.23213893   | 3.515559898  |
| 6240 | -0.352108471 | -0.352108 | -0.352108471 | 5.800199788  | 5.825167992  | 5.775231583  |
| 6241 | 2.826221886  | 5.9181605 | 4.372191214  | 6.076663769  | 6.164674546  | 6.252685322  |
| 6249 | 6.883204546  | 4.9951799 | 5.939192221  | 6.165870606  | 3.666328863  | 8.665412349  |
| 6251 | 6.726948447  | 7.9407334 | 9.154518362  | 6.180405012  | 6.355161685  | 6.005648339  |
| 6257 | -0.352108471 | -0.352108 | -0.352108471 | 4.338279001  | 4.995200701  | 5.652122401  |
| 6259 | -0.352108471 | -0.352108 | -0.352108471 | 7.454358007  | 7.443759962  | 7.464956052  |
| 6261 | 7.004231132  | 6.9612972 | 7.047165038  | -0.352108471 | -0.352108471 | -0.352108471 |
| 6262 | 6.502263028  | 6.5150311 | 6.489495002  | -0.352108471 | -0.352108471 | -0.352108471 |
| 6272 | 7.270779117  | 6.2125362 | 5.1542933    | 7.039990107  | 7.643140836  | 8.246291565  |
| 6275 | 8.153393761  | 7.3173605 | 8.989427022  | 8.241142258  | 5.91433043   | 10.56795409  |
| 6277 | 9.357751616  | 11.395661 | 10.37670654  | 9.237777341  | 12.38552966  | 10.8116535   |
| 6279 | -0.352108471 | -0.352108 | -0.352108471 | 5.39648617   | 6.183039282  | 5.789762726  |
| 6281 | 6.136577919  | 4.6929891 | 3.249400319  | 5.185388519  | 5.295431597  | 5.405474676  |
| 6282 | 8.12917596   | 9.1133925 | 10.09760912  | 7.932796172  | 11.50037722  | 9.716586697  |
| 6284 | -0.352108471 | -0.352108 | -0.352108471 | 5.705814628  | 5.665786693  | 5.745842563  |
| 6299 | 5.937483625  | 6.1515856 | 6.365687632  | 4.66005769   | 5.627473494  | 3.692641885  |
| 6301 | 7.137727412  | 7.2723922 | 7.003062599  | 7.854825187  | 8.08500447   | 7.969914828  |
| 6302 | 4.154872907  | 5.9752582 | 2.334487648  | 1.787060316  | 4.168888164  | 2.97797424   |
| 6303 | 6.303461245  | 6.3152311 | 6.291691359  | -0.352108471 | -0.352108471 | -0.352108471 |
| 6304 | -0.352108471 | -0.352108 | -0.352108471 | 6.958148     | 5.845499835  | 4.73285167   |
| 6305 | -0.352108471 | -0.352108 | -0.352108471 | 6.758753021  | 6.788420481  | 6.729085562  |
| 6307 | 6.139733886  | 5.6083948 | 6.67107294   | 6.3533338    | 7.010964757  | 5.695702844  |
| 6309 | 5.725231643  | 4.4404417 | 7.010021611  | 1.493791735  | 1.437859363  | 1.549724107  |
| 6311 | -0.352108471 | -0.352108 | -0.352108471 | 5.299362255  | 6.270222109  | 7.241081962  |

|      |              |           |              |              |              |              |
|------|--------------|-----------|--------------|--------------|--------------|--------------|
| 6315 | -0.352108471 | -0.352108 | -0.352108471 | 1.383520155  | 3.119148782  | -0.352108471 |
| 6319 | -0.352108471 | -0.352108 | -0.352108471 | 6.34823572   | 7.604813664  | 8.861391608  |
| 6320 | 5.217491139  | 5.4143746 | 5.020607728  | 7.117815169  | 12.14497543  | 2.090654904  |
| 6322 | 7.746459497  | 4.9882456 | 6.367352566  | 4.122478308  | 3.042501174  | 5.202455441  |
| 6326 | 5.9536284    | 5.6886226 | 5.423616894  | 1.631676003  | 3.615460478  | -0.352108471 |
| 6331 | -0.352108471 | -0.352108 | -0.352108471 | 5.738172595  | 4.927679215  | 4.117185835  |
| 6335 | 2.736529761  | 5.825168  | -0.352108471 | -0.352108471 | -0.352108471 | -0.352108471 |
| 6338 | -0.352108471 | -0.352108 | -0.352108471 | 1.596660082  | 1.14221151   | 2.051108653  |
| 6339 | -0.352108471 | -0.352108 | -0.352108471 | 1.601336827  | 1.519649377  | 1.683024277  |
| 6341 | -0.352108471 | -0.352108 | -0.352108471 | 5.169157826  | 5.858453188  | 4.479862463  |
| 6342 | -0.352108471 | -0.352108 | -0.352108471 | 6.785476674  | 4.988525306  | 5.88700099   |
| 6345 | 6.519673958  | 4.1063654 | 8.932982481  | 1.05704313   | 1.305230684  | 0.808855576  |
| 6347 | -0.352108471 | -0.352108 | -0.352108471 | 7.80272331   | 7.822192666  | 7.783253954  |
| 6352 | 9.102898355  | 10.004243 | 10.90558765  | 8.059481688  | 8.44604255   | 8.832603413  |
| 6361 | -0.352108471 | -0.352108 | -0.352108471 | 5.412561087  | 5.421579811  | 5.403542364  |
| 6367 | 5.554553474  | 6.5498529 | 4.559254036  | 3.828621282  | 1.14221151   | 6.515031054  |
| 6382 | -0.352108471 | -0.352108 | -0.352108471 | 5.859617369  | 6.204657504  | 5.514577234  |
| 6383 | -0.352108471 | -0.352108 | -0.352108471 | 5.760537073  | 4.088780129  | 7.432294017  |
| 6385 | 8.032096138  | 6.3520539 | 4.672011589  | 5.371477666  | 10.5666899   | 7.969083781  |
| 6386 | 8.766492414  | 3.0340923 | 5.90029238   | 7.369305842  | 7.745664983  | 6.9929467    |
| 6389 | -0.352108471 | -0.352108 | -0.352108471 | 5.93619057   | 5.774905391  | 5.855547981  |
| 6390 | -0.352108471 | -0.352108 | -0.352108471 | 4.850843637  | 8.389598823  | 6.62022123   |
| 6391 | -0.352108471 | -0.352108 | -0.352108471 | 2.211943219  | 2.232575625  | 2.191310813  |
| 6392 | -0.352108471 | -0.352108 | -0.352108471 | 6.56915909   | 7.587716612  | 5.550601567  |
| 6396 | 6.020381091  | 7.4881062 | 4.552655939  | 10.87012437  | 5.008198433  | 7.9391614    |
| 6397 | 7.579071048  | 6.0245565 | 6.801813774  | 5.571206288  | 6.705287512  | 7.839368736  |
| 6398 | -0.352108471 | -0.352108 | -0.352108471 | 6.396868383  | 8.405319657  | 4.388417108  |
| 6399 | 7.957496831  | 7.6942359 | 7.825866352  | 7.831636626  | 7.098774477  | 6.365912329  |
| 6400 | -0.352108471 | -0.352108 | -0.352108471 | 6.345063428  | 5.914736653  | 6.12990004   |
| 6402 | 5.703568624  | 5.9002924 | 6.097016137  | -0.352108471 | -0.352108471 | -0.352108471 |
| 6404 | -0.352108471 | -0.352108 | -0.352108471 | 5.782493488  | 4.072864942  | 4.927679215  |
| 6406 | -0.352108471 | -0.352108 | -0.352108471 | 4.472823391  | 0.29961159   | 2.38621749   |
| 6415 | -0.352108471 | -0.352108 | -0.352108471 | 7.180112689  | 6.910846784  | 7.449378594  |
| 6416 | -0.352108471 | -0.352108 | -0.352108471 | 2.675180916  | 6.238591483  | 4.456886199  |
| 6418 | 4.615583513  | 4.8795733 | 4.351593721  | 6.897119319  | 7.112080183  | 7.327041047  |
| 6419 | 5.901554956  | 5.7752316 | 5.648908209  | 4.51080266   | 5.327050432  | 4.918926546  |
| 6421 | -0.352108471 | -0.352108 | -0.352108471 | 7.826576286  | 8.858569924  | 6.794582647  |
| 6426 | -0.352108471 | -0.352108 | -0.352108471 | 4.651904177  | 5.191222747  | 4.112585606  |
| 6427 | 6.402440428  | 7.9670544 | 9.531668276  | 6.434644758  | 7.511571734  | 5.357717782  |
| 6428 | 7.80939326   | 10.956345 | 9.382869276  | 7.304663518  | 6.823015534  | 7.786311501  |
| 6429 | -0.352108471 | -0.352108 | -0.352108471 | 6.893972732  | 6.907463027  | 6.880482436  |
| 6430 | -0.352108471 | -0.352108 | -0.352108471 | 7.304663518  | 7.314125625  | 7.29520141   |
| 6431 | -0.352108471 | -0.352108 | -0.352108471 | 8.537491542  | 4.93406783   | 6.735779686  |
| 6432 | 5.217491139  | 4.8379732 | 5.597009043  | 7.262193191  | 6.945202805  | 7.579183577  |
| 6433 | -0.352108471 | -0.352108 | -0.352108471 | 5.745981054  | 6.725861268  | 6.235921161  |
| 6434 | 8.494162324  | 6.5566899 | 4.619217479  | 3.950006671  | 8.223651289  | 6.08682898   |
| 6442 | 5.688622647  | 5.7155573 | 5.661687951  | -0.352108471 | -0.352108471 | -0.352108471 |

|      |              |           |              |              |              |              |
|------|--------------|-----------|--------------|--------------|--------------|--------------|
| 6443 | 10.15175113  | 7.405643  | 4.659534949  | 3.009194439  | 4.232958793  | 3.621076616  |
| 6446 | 9.462682972  | 3.7183336 | 6.590508304  | 2.547787516  | 5.169157826  | 7.790528135  |
| 6448 | -0.352108471 | -0.352108 | -0.352108471 | 6.56347761   | 7.36450578   | 6.963991695  |
| 6449 | 8.162356099  | 8.2580066 | 8.066705567  | 3.244814433  | 2.252618212  | 1.26042199   |
| 6451 | 7.503722725  | 6.7717321 | 7.137727412  | 7.030579874  | 5.763156891  | 6.396868383  |
| 6452 | 7.201907578  | 6.8152071 | 7.588608089  | 4.637194169  | 4.843308497  | 4.43107984   |
| 6453 | 6.798710977  | 6.0510463 | 7.546375659  | -0.352108471 | -0.352108471 | -0.352108471 |
| 6455 | 6.458591234  | 7.6305046 | 8.802417916  | 7.092186231  | 7.512705237  | 7.933224243  |
| 6457 | 1.383520155  | -0.352108 | 3.119148782  | 1.939746065  | 1.939746065  | 1.939746065  |
| 6464 | 6.03798158   | 4.25734   | 7.818623197  | 5.923493182  | 8.340144299  | 3.506842066  |
| 6468 | -0.352108471 | -0.352108 | -0.352108471 | 5.835528372  | 5.825167992  | 5.845888751  |
| 6472 | 4.343430394  | 6.7052875 | 9.067144629  | 6.751466056  | 3.799273699  | 9.703658413  |
| 6473 | 4.587295336  | 3.8056644 | 3.024033369  | 4.907571138  | 5.696126146  | 4.119016129  |
| 6482 | 6.558105999  | 5.3202784 | 5.939192221  | 4.370221164  | 1.603572484  | 7.136869844  |
| 6483 | 4.315575532  | 4.3859368 | 4.245214285  | 6.160141861  | 6.246629235  | 6.073654487  |
| 6489 | 7.858127548  | 6.6353895 | 5.412651472  | 6.259121291  | 3.548254689  | 4.90368799   |
| 6491 | 2.061010194  | 5.3069514 | 3.683980801  | 7.222030251  | 6.62022123   | 6.018412209  |
| 6497 | 7.257665948  | 7.0529463 | 6.848226624  | 7.334005289  | 8.541127394  | 6.126883184  |
| 6498 | 6.046423137  | 6.3599531 | 6.20318811   | 6.074457874  | 5.008183678  | 5.541320776  |
| 6499 | -0.352108471 | -0.352108 | -0.352108471 | 6.51496239   | 5.535173571  | 7.49475121   |
| 6500 | 7.305341479  | 7.3154815 | 7.29520141   | 7.152037191  | 7.168934463  | 7.135139919  |
| 6506 | 6.912680142  | 5.7033035 | 6.307991822  | 0.939116071  | 1.437859363  | 0.440372779  |
| 6509 | 6.801813774  | 5.9212503 | 7.682377213  | -0.352108471 | -0.352108471 | -0.352108471 |
| 6510 | -0.352108471 | -0.352108 | -0.352108471 | 7.545863613  | 7.552297351  | 7.539429874  |
| 6513 | 6.939871798  | 6.9529417 | 6.926801914  | 7.232000306  | 7.241236027  | 7.222764584  |
| 6515 | 7.205085245  | 7.2534814 | 7.15668911   | 0.044132154  | -0.352108471 | 0.440372779  |
| 6517 | 5.80388026   | 7.1217199 | 4.48604062   | 3.374312894  | 2.786645675  | 2.198978456  |
| 6520 | 5.428393874  | 3.6953928 | 7.161394966  | 8.42551598   | 5.30035606   | 6.86293602   |
| 6521 | 4.796807482  | 7.0788472 | 5.937827329  | 2.334436445  | 1.549724107  | 3.119148782  |
| 6522 | 7.755138946  | 6.8748852 | 5.994631444  | 5.506138839  | 7.699410534  | 9.892682229  |
| 6523 | -0.352108471 | -0.352108 | -0.352108471 | 4.43906433   | 2.357098027  | 0.275131723  |
| 6525 | 9.041914027  | 6.0451731 | 7.54354356   | 8.681463169  | 6.968687949  | 5.255912729  |
| 6526 | 6.938491159  | 6.8383365 | 6.888413829  | -0.352108471 | -0.352108471 | -0.352108471 |
| 6528 | 7.452155293  | 8.3106812 | 6.593629393  | 3.145322661  | 4.318824564  | 1.971820759  |
| 6532 | 5.831379091  | 6.8119539 | 7.792528717  | 7.802296601  | 2.867479288  | 5.334887945  |
| 6533 | 6.396868383  | 7.1802794 | 5.613457334  | -0.352108471 | -0.352108471 | -0.352108471 |
| 6534 | 6.056053999  | 8.4985445 | 3.613563458  | -0.352108471 | -0.352108471 | -0.352108471 |
| 6535 | 4.315575532  | 4.3859368 | 4.245214285  | 6.396868383  | 6.410585269  | 6.383151496  |
| 6538 | 1.66201518   | 3.949821  | -0.625790688 | 2.807155681  | 9.160317743  | 5.983736712  |
| 6541 | 6.344459978  | 6.4492768 | 6.396868383  | 8.381648057  | 5.391572833  | 6.886610445  |
| 6545 | 5.42902339   | 6.6749197 | 6.051971547  | -0.352108471 | -0.352108471 | -0.352108471 |
| 6548 | 5.824288785  | 5.873346  | 5.775231583  | 5.983736712  | 6.002308672  | 5.965164752  |
| 6559 | 5.119945056  | 3.4758362 | 6.764053941  | 0.624614178  | 0.808855576  | 0.440372779  |
| 6560 | -0.352108471 | -0.352108 | -0.352108471 | 6.019409619  | 5.121960481  | 6.916858758  |
| 6561 | 6.842157198  | 5.629874  | 4.417590702  | 5.514960729  | 3.816069721  | 7.213851737  |
| 6563 | 5.514960729  | 6.5536427 | 4.476278805  | -0.352108471 | -0.352108471 | -0.352108471 |
| 6564 | 5.763260124  | 5.9611669 | 6.159073607  | 4.653683611  | 3.75223911   | 2.850794609  |

|      |              |           |              |              |              |              |
|------|--------------|-----------|--------------|--------------|--------------|--------------|
| 6566 | 5.894790244  | 6.0908083 | 6.286826437  | -0.352108471 | -0.352108471 | -0.352108471 |
| 6567 | -0.352108471 | -0.352108 | -0.352108471 | 10.10771028  | 4.374249176  | 7.240979727  |
| 6572 | -0.352108471 | -0.352108 | -0.352108471 | 3.585121301  | 3.615460478  | 3.554782125  |
| 6573 | -0.352108471 | -0.352108 | -0.352108471 | 2.469725738  | 2.686833264  | 2.252618212  |
| 6574 | -0.352108471 | -0.352108 | -0.352108471 | 6.596757815  | 7.00289198   | 6.190623651  |
| 6575 | 2.326353688  | 6.5422756 | 4.434314669  | 5.325866904  | 6.67294274   | 5.999404822  |
| 6576 | 6.91261797   | 4.4646273 | 5.688622647  | 5.015048397  | 3.342751494  | 4.178899946  |
| 6579 | 4.172115449  | 7.2670145 | 5.719564994  | 5.172734797  | 6.297069475  | 7.421404152  |
| 6585 | -0.352108471 | -0.352108 | -0.352108471 | 4.191896335  | 7.40850324   | 5.800199788  |
| 6591 | 5.678624265  | 8.030747  | 5.354685649  | 3.178899946  | 3.413887841  | 1.94391205   |
| 6594 | -0.352108471 | -0.352108 | -0.352108471 | -0.352108471 | 4.461215055  | 2.099323895  |
| 6597 | -0.352108471 | -0.352108 | -0.352108471 | 6.316009143  | 6.355161685  | 6.276856601  |
| 6598 | 7.137727412  | 6.5599619 | 7.715492972  | -0.352108471 | -0.352108471 | -0.352108471 |
| 6599 | -0.352108471 | -0.352108 | -0.352108471 | 6.949901658  | 5.739370866  | 8.16043245   |
| 6601 | 5.467416477  | 4.8121945 | 5.139805497  | 3.119148782  | 3.119148782  | 3.119148782  |
| 6605 | 8.067932147  | 7.2841737 | 7.676052938  | 6.087644454  | 7.922387229  | 4.25290168   |
| 6609 | 5.017136436  | 5.6370472 | 4.397225703  | 9.288236408  | 6.749630214  | 4.21102402   |
| 6611 | -0.352108471 | -0.352108 | -0.352108471 | 9.773578061  | 7.033174504  | 4.292770948  |
| 6612 | -0.352108471 | -0.352108 | -0.352108471 | 9.513796011  | 7.387215402  | 5.260634793  |
| 6613 | 1.514670715  | 2.6159134 | 2.065292044  | 8.069981388  | 10.71050328  | 5.4294595    |
| 6617 | 4.956047109  | 5.3484471 | 5.152247113  | 5.616719353  | 6.685265521  | 7.753811688  |
| 6618 | 4.274165465  | 8.2734991 | 6.273832259  | -0.352108471 | -0.352108471 | -0.352108471 |
| 6624 | 8.038621034  | 10.62286  | 5.454381622  | 7.763976467  | 8.62809411   | 9.492211753  |
| 6625 | 5.90029238   | 5.8500532 | 5.950531523  | 0.948388217  | 3.556848206  | 2.252618212  |
| 6626 | -0.352108471 | -0.352108 | -0.352108471 | 7.240216663  | 4.839086163  | 6.039651413  |
| 6628 | 11.99680028  | 8.2448542 | 4.492908162  | 7.8740963    | 8.534135593  | 9.194174886  |
| 6629 | 5.843161371  | 5.4493489 | 5.64625513   | 6.335196408  | 6.070328712  | 6.600064104  |
| 6631 | -0.352108471 | -0.352108 | -0.352108471 | 6.643431516  | 9.716029238  | 8.179730377  |
| 6632 | 5.946632141  | 5.0409343 | 5.493783215  | 7.679141104  | 5.152027228  | 6.415584166  |
| 6633 | 6.020381091  | 6.0384535 | 6.002308672  | 8.106008367  | 8.11143708   | 8.100579655  |
| 6634 | 6.823749242  | 3.7260705 | 9.921427983  | 9.276916367  | 8.091018256  | 6.905120145  |
| 6635 | 3.945254192  | 5.5066049 | 2.383903483  | 6.844671015  | 5.295416918  | 6.070043966  |
| 6636 | 7.281663147  | 6.4675091 | 6.874586128  | 6.77374078   | 6.785704032  | 6.761777527  |
| 6637 | 1.501017585  | -0.352108 | 3.354143641  | 3.055017344  | 3.272876937  | 3.49073653   |
| 6641 | 6.801813774  | 8.0440346 | 5.559592905  | -0.352108471 | -0.352108471 | -0.352108471 |
| 6642 | 6.08682898   | 6.0384535 | 6.135204448  | 6.621168045  | 6.653870824  | 6.588465267  |
| 6643 | 4.870777317  | 4.6146226 | 4.358467959  | 6.78795931   | 5.096513741  | 5.942236525  |
| 6645 | 6.584823174  | 6.4105853 | 6.759061079  | 3.699000565  | 1.939746065  | 5.458255064  |
| 6646 | 6.341534873  | 6.9808439 | 7.62015295   | 5.638163399  | 6.490302786  | 7.342442172  |
| 6647 | 5.688622647  | 7.4091813 | 3.968064     | 7.956236881  | 9.787541769  | 6.124931994  |
| 6648 | -0.352108471 | -0.352108 | -0.352108471 | 5.947347959  | 5.723485516  | 5.499623073  |
| 6649 | 5.354685649  | 5.3835036 | 5.325867653  | 6.368251906  | 6.31523113   | 6.421272681  |
| 6650 | -0.352108471 | -0.352108 | -0.352108471 | 7.21075981   | 10.51385674  | 3.907662882  |
| 6651 | -0.352108471 | -0.352108 | -0.352108471 | 5.608262756  | 5.903760504  | 6.199258253  |
| 6659 | 5.183745457  | 6.0665761 | 5.625160771  | -0.352108471 | -0.352108471 | -0.352108471 |
| 6664 | 4.257389521  | 5.9391922 | 7.620994922  | 0.044132154  | 0.440372779  | -0.352108471 |
| 6666 | -0.352108471 | -0.352108 | -0.352108471 | 4.332084414  | 6.468151867  | 8.604219321  |

|      |              |           |              |              |              |              |
|------|--------------|-----------|--------------|--------------|--------------|--------------|
| 6667 | -0.352108471 | -0.352108 | -0.352108471 | 2.755108764  | 7.981729883  | 5.368419324  |
| 6670 | 4.717795902  | 7.1211232 | 5.919459543  | 4.726871378  | 5.26418547   | 4.995528424  |
| 6671 | 7.09830115   | 7.2347133 | 6.961889018  | 7.500987084  | 4.746747472  | 6.123867278  |
| 6674 | 5.800199788  | 5.2814525 | 6.318947122  | -0.352108471 | -0.352108471 | -0.352108471 |
| 6675 | -0.352108471 | -0.352108 | -0.352108471 | 5.575446642  | 6.599842267  | 6.087644454  |
| 6678 | 9.31376821   | 11.659664 | 10.48671632  | 11.34502642  | 9.902487785  | 10.6237571   |
| 6683 | 6.87773092   | 5.456102  | 8.299359815  | 6.185612433  | 7.217970939  | 5.153253928  |
| 6689 | 6.208927462  | 6.3425287 | 6.476129899  | 7.199478037  | 7.75226244   | 6.646693634  |
| 6692 | 5.681727979  | 7.0797459 | 4.283710045  | -0.352108471 | -0.352108471 | -0.352108471 |
| 6693 | 6.387890954  | 7.7662254 | 9.144559764  | 5.789597744  | 5.054280952  | 6.524914536  |
| 6694 | 2.495396186  | 4.7929677 | 7.090539263  | 1.779958785  | 2.934469601  | 4.088980418  |
| 6695 | 5.824288785  | 6.7710897 | 4.877487911  | 6.165870606  | 5.346602799  | 6.985138413  |
| 6709 | -0.352108471 | -0.352108 | -0.352108471 | 7.859529901  | 5.47278451   | 10.24627529  |
| 6710 | 6.567543357  | 4.6827782 | 5.625160771  | -0.352108471 | -0.352108471 | -0.352108471 |
| 6711 | -0.352108471 | -0.352108 | -0.352108471 | 7.63947808   | 5.284974356  | 2.930470632  |
| 6712 | -0.352108471 | -0.352108 | -0.352108471 | 6.276080792  | 5.698804213  | 6.853357372  |
| 6713 | -0.352108471 | -0.352108 | -0.352108471 | 5.246198282  | 7.818685685  | 6.532441983  |
| 6715 | 9.427849947  | 4.3489777 | 6.888413829  | 4.80208491   | 1.742933089  | 7.861236731  |
| 6717 | 5.354685649  | 5.3835036 | 5.325867653  | 6.149337851  | 6.174080069  | 6.124595632  |
| 6718 | 3.752553593  | 6.581932  | 5.167242809  | 3.399021821  | 1.731739118  | 5.066304524  |
| 6720 | 3.127737875  | 3.5255613 | 2.729914416  | 5.337471912  | 4.983522488  | 5.1604972    |
| 6721 | -0.352108471 | -0.352108 | -0.352108471 | 8.910178217  | 5.511341403  | 7.21075981   |
| 6722 | 6.640019393  | 6.6538708 | 6.626167961  | 6.47267644   | 6.497336045  | 6.448016836  |
| 6723 | 4.861630841  | 6.6580232 | 8.454415574  | 7.990302333  | 8.568299261  | 7.412305405  |
| 6726 | -0.352108471 | -0.352108 | -0.352108471 | 6.204656258  | 6.215464554  | 6.193847962  |
| 6727 | 4.973433486  | 7.6439409 | 10.31444825  | 9.870228329  | 8.365982707  | 6.861737086  |
| 6728 | -0.352108471 | -0.352108 | -0.352108471 | 5.147851643  | 5.539970986  | 5.343911315  |
| 6729 | -0.352108471 | -0.352108 | -0.352108471 | 6.250902217  | 7.140810338  | 8.030718458  |
| 6730 | -0.352108471 | -0.352108 | -0.352108471 | 7.895050693  | 7.903541863  | 7.886559523  |
| 6732 | 2.618057952  | 1.763278  | 3.472837931  | 5.859617369  | 6.593651383  | 5.125583354  |
| 6733 | -0.352108471 | -0.352108 | -0.352108471 | 7.405724394  | 4.313510344  | 5.859617369  |
| 6734 | 8.319417943  | 5.7884526 | 7.05393529   | 7.877942624  | 6.383389221  | 9.372496027  |
| 6737 | -0.352108471 | -0.352108 | -0.352108471 | 7.331272742  | 7.35252903   | 7.310016454  |
| 6742 | -0.352108471 | -0.352108 | -0.352108471 | 7.359412085  | 5.817096042  | 6.588254064  |
| 6744 | 4.957624072  | 5.689454  | 4.225794122  | 8.809910093  | 3.398948843  | 6.104429468  |
| 6745 | 8.869688135  | 6.8861366 | 4.902585161  | 5.213324008  | 4.342448827  | 6.084199188  |
| 6746 | 5.537725397  | 5.8242888 | 6.110852173  | 7.738544772  | 5.480541275  | 6.609543024  |
| 6747 | 7.509824613  | 9.1458822 | 8.327853397  | 9.073348878  | 10.73002222  | 7.416675538  |
| 6748 | 8.740118719  | 7.7710199 | 8.255569322  | 8.558088434  | 7.620441317  | 6.6827942    |
| 6749 | -0.352108471 | -0.352108 | -0.352108471 | 1.508345913  | 4.416402217  | 2.962374065  |
| 6751 | -0.352108471 | -0.352108 | -0.352108471 | 7.637943112  | 7.557875189  | 7.718011034  |
| 6752 | 5.660837638  | 4.3778353 | 6.943839959  | 3.061037829  | 4.399624403  | 1.722451256  |
| 6753 | 6.167582836  | 6.1999612 | 6.135204448  | -0.352108471 | -0.352108471 | -0.352108471 |
| 6760 | 6.510289667  | 7.6505815 | 7.080435576  | 8.479827407  | 7.092103815  | 5.704380222  |
| 6764 | -0.352108471 | -0.352108 | -0.352108471 | 7.584228848  | 7.706046291  | 7.64513757   |
| 6767 | 6.477002382  | 4.5653797 | 5.521191046  | -0.352108471 | -0.352108471 | -0.352108471 |
| 6770 | 4.648905722  | 5.3028288 | 5.956751783  | 1.835742592  | 1.939746065  | 1.731739118  |



|      |              |           |              |              |              |              |
|------|--------------|-----------|--------------|--------------|--------------|--------------|
| 6772 | 4.977314285  | 6.2738323 | 7.570350233  | 7.209478834  | 6.81199092   | 7.606966749  |
| 6773 | 6.703072347  | 6.3083327 | 5.913593129  | 7.316245125  | 6.63791606   | 7.994574191  |
| 6774 | 8.390162921  | 7.4999152 | 6.609667386  | 0.206368668  | 1.242811212  | 0.72458994   |
| 6776 | -0.352108471 | -0.352108 | -0.352108471 | 5.803338431  | 7.028519519  | 6.415928975  |
| 6778 | 5.55876787   | 7.1052417 | 4.012294043  | 5.946951326  | 8.407112158  | 7.177031742  |
| 6780 | 5.078585001  | 6.8745861 | 8.670587254  | 0.044132154  | -0.352108471 | 0.440372779  |
| 6781 | 7.730300925  | 6.981074  | 8.479527836  | 6.537951281  | 7.18048333   | 6.859217306  |
| 6782 | 4.649979619  | 7.0425631 | 2.257396117  | 10.34088656  | 2.130955762  | 6.235921161  |
| 6786 | 7.270880449  | 4.6897876 | 5.980334028  | 2.218009503  | 4.522024694  | 6.826039885  |
| 6787 | 2.937735333  | 5.6934157 | 4.315575532  | 5.468948874  | -0.214507862 | 2.627220506  |
| 6789 | 8.549769548  | 6.4542211 | 4.358672625  | 6.869001299  | 7.149537332  | 6.588465267  |
| 6790 | -0.352108471 | -0.352108 | -0.352108471 | 2.570858726  | 5.458255064  | 8.345651402  |
| 6793 | 6.735779686  | 6.7317815 | 6.739777864  | 7.224139774  | 8.294990479  | 6.153289069  |
| 6794 | -0.352108471 | -0.352108 | -0.352108471 | 3.298455116  | 7.039860535  | 5.169157826  |
| 6804 | 5.339588368  | 5.8242888 | 6.308989201  | -0.352108471 | -0.352108471 | -0.352108471 |
| 6809 | 4.315575532  | 6.0679574 | 2.563193654  | 6.100160853  | 5.264042908  | 4.427924963  |
| 6810 | -0.352108471 | -0.352108 | -0.352108471 | 7.013360586  | 7.028614492  | 6.998106681  |
| 6811 | 5.16476681   | 1.0907089 | 3.127737875  | 1.249691864  | 2.211943219  | 3.174194573  |
| 6812 | 6.537383725  | 6.712035  | 6.362732455  | 4.351814282  | 8.841701349  | 6.596757815  |
| 6813 | -0.352108471 | -0.352108 | -0.352108471 | 4.889603357  | 6.532441983  | 8.175280609  |
| 6815 | 7.434535565  | 6.5310032 | 5.627470797  | 7.44507053   | 5.863843461  | 6.654456996  |
| 6822 | 5.992801103  | 6.6924259 | 7.392050751  | 2.387802959  | 2.012146151  | 2.763459768  |
| 6827 | -0.352108471 | -0.352108 | -0.352108471 | 5.789762726  | 6.282138603  | 5.297386849  |
| 6829 | 7.249813015  | 6.5017089 | 7.997917169  | -0.352108471 | -0.352108471 | -0.352108471 |
| 6830 | 4.850359235  | 7.1904029 | 6.020381091  | 6.235921161  | 5.626334218  | 6.845508104  |
| 6832 | 2.111839558  | 7.9224333 | 5.017136436  | -0.352108471 | -0.352108471 | -0.352108471 |
| 6835 | -0.352108471 | -0.352108 | -0.352108471 | 4.869552853  | 6.32428113   | 5.596916991  |
| 6836 | 5.016503495  | 5.3862141 | 5.201358809  | 7.857072167  | 7.413298444  | 8.300845891  |
| 6837 | -0.352108471 | -0.352108 | -0.352108471 | 3.11804817   | 6.038453511  | 8.958858852  |
| 6838 | 5.718459767  | 7.9293044 | 3.507615128  | -0.352108471 | -0.352108471 | -0.352108471 |
| 6839 | 6.689537938  | 4.2920309 | 9.087044965  | -0.352108471 | -0.352108471 | -0.352108471 |
| 6843 | 5.463922025  | 5.5293114 | 5.398532684  | -0.352108471 | -0.352108471 | -0.352108471 |
| 6844 | -0.352108471 | -0.352108 | -0.352108471 | 6.588254064  | 6.617035395  | 6.559472732  |
| 6856 | -0.352108471 | -0.352108 | -0.352108471 | 4.021644534  | 5.284974356  | 6.548304179  |
| 6860 | -0.352108471 | -0.352108 | -0.352108471 | 7.554789051  | 7.218748868  | 6.882708686  |
| 6867 | -0.352108471 | -0.352108 | -0.352108471 | 6.13425979   | 6.957641788  | 6.545950789  |
| 6869 | 6.792815994  | 8.5320824 | 7.662449217  | -0.352108471 | -0.352108471 | -0.352108471 |
| 6873 | 6.357423773  | 6.0908083 | 5.824192908  | -0.352108471 | -0.352108471 | -0.352108471 |
| 6874 | -0.352108471 | -0.352108 | -0.352108471 | 6.676981771  | 5.64354012   | 4.610098468  |
| 6875 | -0.352108471 | -0.352108 | -0.352108471 | 5.017136436  | 5.407946464  | 4.626326407  |
| 6876 | 9.878330788  | 12.15879  | 11.01856029  | 11.44212027  | 11.82947108  | 12.2168219   |
| 6878 | -0.352108471 | -0.352108 | -0.352108471 | 9.608918664  | 7.374725876  | 5.140533088  |
| 6879 | -0.352108471 | -0.352108 | -0.352108471 | 7.207985984  | 8.682110645  | 5.733861322  |
| 6880 | 6.463674915  | 3.1920633 | 9.73528654   | 4.526657632  | 6.165870606  | 7.80508358   |
| 6881 | 3.884316644  | 0.7435668 | 2.313941724  | 6.919435259  | 6.803366569  | 7.035503949  |
| 6882 | 5.962279012  | 3.7639149 | 4.863096971  | 6.113115027  | 6.284083537  | 5.942146517  |
| 6885 | -0.352108471 | -0.352108 | -0.352108471 | 5.661611801  | 6.59818828   | 6.12990004   |

|      |              |           |              |              |              |              |
|------|--------------|-----------|--------------|--------------|--------------|--------------|
| 6888 | 9.847085445  | 7.3089428 | 8.578014108  | 7.683897278  | 8.077012352  | 7.290782205  |
| 6890 | 6.16332568   | 6.6073775 | 7.051429238  | 6.233692038  | 5.733781386  | 5.983736712  |
| 6892 | 6.780213449  | 7.681292  | 5.879134873  | 6.329244956  | 5.996241254  | 5.663237552  |
| 6895 | -0.352108471 | -0.352108 | -0.352108471 | 5.453492919  | 4.401865511  | 4.927679215  |
| 6897 | 7.217317616  | 7.2305473 | 7.204087928  | 2.211943219  | 2.232575625  | 2.191310813  |
| 6898 | 5.698028929  | 4.6079329 | 5.152980918  | 1.864658285  | 1.731739118  | 1.997577452  |
| 6902 | 5.217491139  | 5.2437595 | 5.191222747  | 7.942419631  | 7.951299987  | 7.933539276  |
| 6904 | -0.352108471 | -0.352108 | -0.352108471 | 3.964889143  | 3.628807669  | 3.292726194  |
| 6905 | 6.967511245  | 10.331026 | 3.603996662  | -0.352108471 | -0.352108471 | -0.352108471 |
| 6907 | -0.352108471 | -0.352108 | -0.352108471 | 5.052267685  | 5.124543452  | 4.979991919  |
| 6909 | 6.288510867  | 3.9393654 | 8.637656348  | 3.864327241  | 3.622938259  | 3.74363275   |
| 6917 | -0.352108471 | -0.352108 | -0.352108471 | 7.347728623  | 4.927679215  | 2.507629806  |
| 6919 | -0.352108471 | -0.352108 | -0.352108471 | 2.124237496  | 2.147539136  | 2.100935855  |
| 6921 | 6.214089997  | 5.1764144 | 7.251765584  | 5.325716078  | 5.336173319  | 5.315258837  |
| 6923 | 6.499772832  | 6.4354046 | 6.371036311  | 6.713235695  | 8.758017437  | 7.735626566  |
| 6924 | -0.352108471 | -0.352108 | -0.352108471 | 6.434644758  | 6.618106005  | 6.251183512  |
| 6926 | -0.352108471 | -0.352108 | -0.352108471 | 8.513959953  | 8.527118113  | 8.500801793  |
| 6929 | 2.201036472  | 5.2437595 | 3.754181416  | -0.352108471 | -0.352108471 | -0.352108471 |
| 6935 | 6.121528769  | 3.3840954 | 8.858962183  | -0.352108471 | -0.352108471 | -0.352108471 |
| 6938 | 8.263529236  | 4.6638206 | 6.463674915  | -0.352108471 | -0.352108471 | -0.352108471 |
| 6942 | -0.352108471 | -0.352108 | -0.352108471 | 7.74246206   | 5.593839678  | 6.668150869  |
| 6943 | -0.352108471 | -0.352108 | -0.352108471 | 5.760537073  | 5.012886332  | 6.508187813  |
| 6945 | -0.352108471 | -0.352108 | -0.352108471 | 1.631676003  | 3.615460478  | -0.352108471 |
| 6949 | -0.352108471 | -0.352108 | -0.352108471 | 4.829993231  | 8.642320562  | 6.736156896  |
| 6950 | 4.213150349  | 5.6886226 | 7.164094945  | 6.86659232   | 9.277284275  | 8.071938297  |
| 6975 | 9.614061112  | 4.588921  | 7.101491044  | -0.352108471 | -0.352108471 | -0.352108471 |
| 6988 | 6.64166369   | 5.703893  | 7.579434344  | 4.732462344  | 5.809232281  | 6.886002219  |
| 6992 | -0.352108471 | -0.352108 | -0.352108471 | 5.903760504  | 6.621926089  | 5.185594919  |
| 6993 | 5.192934229  | 4.8413386 | 5.017136436  | 5.07824431   | 7.572376051  | 6.32531018   |
| 6996 | -0.352108471 | -0.352108 | -0.352108471 | 6.204656258  | 6.215464554  | 6.193847962  |
| 6997 | 5.624064457  | 5.054281  | 6.193847962  | 3.883361274  | 5.665786693  | 2.100935855  |
| 6998 | 2.280956994  | -0.921828 | 5.483742177  | 0.849500091  | 2.051108653  | -0.352108471 |
| 7001 | 4.178899946  | 5.6927553 | 2.66504463   | 8.232913146  | 7.002290573  | 9.463535719  |
| 7003 | -0.352108471 | -0.352108 | -0.352108471 | 7.70317734   | 9.159777686  | 6.246576995  |
| 7004 | 5.671658532  | 6.4525073 | 7.233356065  | -0.352108471 | -0.352108471 | -0.352108471 |
| 7005 | -0.352108471 | -0.352108 | -0.352108471 | 5.296001127  | 5.718459767  | 6.140918407  |
| 7007 | 6.219444057  | 5.9391922 | 5.658940386  | -0.352108471 | -0.352108471 | -0.352108471 |
| 7009 | 7.825866352  | 7.8309189 | 7.82081384   | 6.665170885  | 11.88917304  | 9.277171965  |
| 7011 | 7.308970622  | 6.6645531 | 7.953388098  | 6.599329815  | 8.087512342  | 7.343421079  |
| 7013 | 7.307187158  | 6.6212707 | 5.935354281  | 2.020264194  | 2.232575625  | 1.807952763  |
| 7014 | 4.262378     | 6.0421162 | 5.152247113  | 4.792646314  | 4.124295122  | 5.460997507  |
| 7016 | -0.352108471 | -0.352108 | -0.352108471 | 2.686833264  | 2.686833264  | 2.686833264  |
| 7020 | -0.352108471 | -0.352108 | -0.352108471 | 9.989644737  | 5.261530125  | 7.625587431  |
| 7025 | 3.127737875  | 3.136327  | 3.119148782  | 2.169424975  | 2.191310813  | 2.147539136  |
| 7026 | 4.077393428  | 5.5072139 | 4.792303669  | 7.188191238  | 7.232000306  | 7.275809374  |
| 7027 | 1.210463582  | 1.3921092 | 1.573754916  | 5.400338784  | 6.022050925  | 6.643763066  |
| 7029 | 3.796320559  | 4.1176964 | 4.439072308  | 6.496486588  | 8.162566716  | 4.830406459  |

|      |              |           |              |              |              |              |
|------|--------------|-----------|--------------|--------------|--------------|--------------|
| 7030 | 6.184820943  | 7.1134517 | 5.25619023   | 7.757756268  | 6.949744831  | 7.353750549  |
| 7035 | -0.352108471 | -0.352108 | -0.352108471 | 4.08236011   | 4.245214285  | 3.919505936  |
| 7037 | 8.025076756  | 2.9624897 | 5.493783215  | -0.352108471 | -0.352108471 | -0.352108471 |
| 7038 | 6.241909143  | 6.4453648 | 6.038453511  | -0.352108471 | -0.352108471 | -0.352108471 |
| 7040 | 7.21196432   | 8.6179819 | 5.80594671   | 6.489024611  | 7.64513757   | 8.801250529  |
| 7041 | 7.99158635   | 5.8881572 | 6.939871798  | 7.079987565  | 8.035014128  | 8.99004069   |
| 7042 | -0.352108471 | -0.352108 | -0.352108471 | 8.003763827  | 4.827404505  | 6.415584166  |
| 7044 | -0.352108471 | -0.352108 | -0.352108471 | 3.119148782  | 3.119148782  | 3.119148782  |
| 7046 | -0.352108471 | -0.352108 | -0.352108471 | 6.12990004   | 3.548149212  | 8.711650868  |
| 7048 | -0.352108471 | -0.352108 | -0.352108471 | 5.760537073  | 5.775231583  | 5.745842563  |
| 7049 | 7.373509403  | 5.9065294 | 6.640019393  | 0.044132154  | 0.440372779  | -0.352108471 |
| 7050 | 5.152247113  | 5.1799508 | 5.124543452  | -0.352108471 | -0.352108471 | -0.352108471 |
| 7052 | 10.36893741  | 10.844273 | 9.893601362  | 9.020323195  | 9.387948573  | 9.204135884  |
| 7054 | -0.352108471 | -0.352108 | -0.352108471 | 1.783698732  | 3.919505936  | -0.352108471 |
| 7056 | -0.352108471 | -0.352108 | -0.352108471 | 7.660585748  | 4.514703161  | 6.087644454  |
| 7057 | 9.964021306  | 12.602158 | 7.325884788  | 11.88604951  | 10.61082144  | 11.24843547  |
| 7058 | 5.648189858  | 9.935878  | 7.792033924  | 9.892302962  | 6.971306167  | 8.431804565  |
| 7059 | 6.433318728  | 6.117696  | 6.74894142   | -0.352108471 | -0.352108471 | -0.352108471 |
| 7068 | 1.719878445  | 3.1277379 | 4.535597306  | 2.274515706  | 0.888730781  | 3.660300631  |
| 7070 | 10.03637912  | 8.5003621 | 9.268370591  | 9.278239352  | 10.1743403   | 8.382138406  |
| 7071 | -0.352108471 | -0.352108 | -0.352108471 | 8.74723766   | 4.122051856  | 6.434644758  |
| 7073 | 5.217491139  | 5.7824372 | 4.652545128  | 7.622315458  | 5.845489766  | 9.39914115   |
| 7076 | 8.043505415  | 8.3876167 | 7.699394096  | 9.121051672  | 7.427648029  | 5.734244386  |
| 7077 | 7.503741249  | 7.1425377 | 7.864944834  | 9.425667153  | 9.017159113  | 9.834175193  |
| 7078 | 7.286324647  | 8.3380415 | 6.23460779   | 8.25743723   | 9.381522245  | 7.133352214  |
| 7083 | 7.15770761   | 7.1689345 | 7.146480757  | -0.352108471 | -0.352108471 | -0.352108471 |
| 7084 | 5.343125955  | 3.1277379 | 0.912349796  | 7.139330909  | 7.324669702  | 7.232000306  |
| 7086 | 8.001125914  | 9.4179537 | 8.709539825  | 8.607193972  | 8.998058326  | 9.388922679  |
| 7088 | -0.352108471 | -0.352108 | -0.352108471 | 5.745394463  | 6.549001936  | 4.94178699   |
| 7093 | -0.352108471 | -0.352108 | -0.352108471 | 0.793818797  | -0.352108471 | 1.939746065  |
| 7094 | 8.690990141  | 8.3748765 | 8.53293333   | 9.22299889   | 8.932767957  | 8.642537024  |
| 7095 | 3.895530886  | 4.671913  | 3.119148782  | 6.786143201  | 8.54738112   | 5.024905282  |
| 7099 | -0.352108471 | -0.352108 | -0.352108471 | 6.079602095  | 4.80208491   | 3.524567725  |
| 7106 | 5.939192221  | 5.9574518 | 5.920932683  | 5.91274284   | 10.36126965  | 8.137006247  |
| 7109 | -0.352108471 | -0.352108 | -0.352108471 | 6.396868383  | 6.083197802  | 6.710538963  |
| 7110 | 3.319236702  | 5.3208399 | 7.322443168  | 6.336614961  | 7.155133943  | 5.518095979  |
| 7112 | 4.260537128  | 6.189816  | 8.119094937  | 5.034906589  | 6.515031054  | 3.554782125  |
| 7114 | 11.50148523  | 10.947952 | 12.05501867  | 14.46183784  | 12.28492837  | 10.10801891  |
| 7122 | 6.352053864  | 6.3831515 | 6.320956231  | -0.352108471 | -0.352108471 | -0.352108471 |
| 7123 | -0.352108471 | -0.352108 | -0.352108471 | 5.284974356  | 5.315258837  | 5.254689875  |
| 7126 | -0.352108471 | -0.352108 | -0.352108471 | 5.382055296  | 6.434644758  | 7.48723422   |
| 7127 | 7.203164038  | 5.8242888 | 4.445413531  | -0.352108471 | -0.352108471 | -0.352108471 |
| 7132 | 4.315575532  | 4.3859368 | 4.245214285  | 7.396868934  | 7.407655215  | 7.386082653  |
| 7133 | 4.528924884  | 4.3210125 | 4.73683722   | 7.556440236  | 6.469790712  | 5.383141189  |
| 7135 | 6.933588664  | 4.7602952 | 9.10688216   | 6.281677474  | 6.522035092  | 6.041319856  |
| 7143 | 2.201036472  | -0.352108 | 4.754181416  | -0.352108471 | -0.352108471 | -0.352108471 |
| 7145 | 6.868366512  | 5.9002924 | 4.932218249  | 6.776636297  | 7.585451881  | 8.394267464  |

|      |              |           |              |              |              |              |
|------|--------------|-----------|--------------|--------------|--------------|--------------|
| 7150 | 5.980334028  | 6.7238948 | 5.236773301  | 2.049826567  | 2.211943219  | 2.374059871  |
| 7153 | 8.230657635  | 6.6400194 | 5.04938115   | 6.450302837  | 6.479332994  | 6.421272681  |
| 7155 | 3.515141236  | 3.6761388 | 3.354143641  | -0.352108471 | -0.352108471 | -0.352108471 |
| 7156 | 6.646597015  | 5.0110999 | 5.828848464  | 6.448016836  | 6.840089017  | 6.055944654  |
| 7157 | 4.905208921  | 4.8304259 | 4.079991919  | 7.51840843   | 7.311706859  | 7.105005287  |
| 7158 | -0.352108471 | -0.352108 | -0.352108471 | 7.57445379   | 5.017633941  | 6.296043865  |
| 7159 | 5.862048362  | 5.7285791 | 5.59510977   | -0.352108471 | -0.352108471 | -0.352108471 |
| 7162 | 8.234191881  | 6.056054  | 3.877916117  | 4.155131623  | 9.598027907  | 6.876579765  |
| 7167 | 7.665742317  | 7.6490111 | 7.682473564  | 9.910721168  | 6.75814483   | 8.334432999  |
| 7168 | 7.042523083  | 7.6279541 | 6.45709211   | 7.426371554  | 8.885379694  | 8.155875624  |
| 7169 | 10.03322986  | 11.061648 | 10.54743916  | 10.90800786  | 9.069536152  | 12.74647957  |
| 7170 | -0.352108471 | -0.352108 | -0.352108471 | 6.500182882  | 7.280233065  | 8.060283248  |
| 7171 | 7.426398055  | 7.3674502 | 7.308502298  | 6.991162987  | 8.43340695   | 7.712284969  |
| 7172 | 6.73526938   | 7.2641212 | 7.792973081  | 4.293517576  | 6.609965635  | 5.451741606  |
| 7175 | -0.352108471 | -0.352108 | -0.352108471 | 4.764087889  | 7.738419133  | 6.251253511  |
| 7178 | 10.20779186  | 8.738004  | 7.268216151  | 8.916176357  | 10.74883997  | 12.58150358  |
| 7184 | 8.216597005  | 10.367775 | 6.065418822  | 12.89729099  | 10.01238748  | 7.127483981  |
| 7186 | 8.419901028  | 6.573969  | 4.728036971  | -0.352108471 | -0.352108471 | -0.352108471 |
| 7187 | 5.493783215  | 4.9246879 | 6.062878518  | 0.440372779  | 0.440372779  | 0.440372779  |
| 7188 | -0.352108471 | -0.352108 | -0.352108471 | 3.287523807  | 4.843308497  | 1.731739118  |
| 7189 | 3.437881108  | 5.8177376 | 8.197594134  | 7.532001379  | 5.511864271  | 3.491727164  |
| 7203 | 6.552587837  | 6.6073775 | 6.662167081  | 7.071686331  | 7.220841083  | 7.369995835  |
| 7204 | 5.626442006  | 5.1758216 | 6.077062405  | 7.05069004   | 6.31523113   | 5.579772221  |
| 7205 | 7.052946286  | 8.0727896 | 6.033102994  | 8.077831649  | 8.735855922  | 7.419807377  |
| 7225 | -0.352108471 | -0.352108 | -0.352108471 | 6.059042783  | 6.296043865  | 6.533044948  |
| 7227 | -0.352108471 | -0.352108 | -0.352108471 | 5.663737322  | 5.665786693  | 5.661687951  |
| 7247 | 5.908363377  | 5.980334  | 6.05230468   | -0.352108471 | -0.352108471 | -0.352108471 |
| 7248 | -0.352108471 | -0.352108 | -0.352108471 | 6.266367194  | 7.501435361  | 5.031299027  |
| 7249 | -0.352108471 | -0.352108 | -0.352108471 | 5.419832838  | 7.649062677  | 9.878292516  |
| 7251 | -0.352108471 | -0.352108 | -0.352108471 | 4.526097092  | 5.169157826  | 5.812218559  |
| 7257 | 6.230072615  | 6.384557  | 6.307314817  | 6.720370627  | 6.093637723  | 7.347103531  |
| 7259 | 8.258638281  | 5.4798047 | 11.03747187  | 6.714644217  | 9.347808123  | 8.03122617   |
| 7260 | 6.612891896  | 6.573969  | 6.535046103  | 2.049256654  | 2.100935855  | 1.997577452  |
| 7262 | 8.181783015  | 8.948124  | 8.564953525  | 8.59701368   | 8.051529305  | 8.324271493  |
| 7263 | -0.352108471 | -0.352108 | -0.352108471 | 3.465863469  | 5.85425191   | 4.66005769   |
| 7264 | 8.235744582  | 4.9790103 | 6.607377459  | 4.264528015  | 7.542992993  | 5.903760504  |
| 7265 | -0.352108471 | -0.352108 | -0.352108471 | 6.573968999  | 6.728212604  | 6.419725395  |
| 7266 | -0.352108471 | -0.352108 | -0.352108471 | 6.840114058  | 9.619491292  | 4.060736825  |
| 7267 | 8.198892706  | 7.0911954 | 5.983498184  | 8.872444598  | 6.454226043  | 7.66333532   |
| 7273 | 6.618332762  | 7.935824  | 9.253315231  | 6.861182604  | 6.611309999  | 7.111055209  |
| 7275 | 7.023635522  | 5.0171267 | 6.020381091  | -0.352108471 | -0.352108471 | -0.352108471 |
| 7277 | -0.352108471 | -0.352108 | -0.352108471 | 7.412836985  | 6.548941201  | 5.685045417  |
| 7280 | 6.449091275  | 5.71952   | 7.178662578  | 5.115552387  | 6.837975653  | 8.560398919  |
| 7283 | -0.352108471 | -0.352108 | -0.352108471 | 6.32531018   | 5.186438854  | 7.464181507  |
| 7284 | 6.183964016  | 6.7115627 | 5.656365381  | 7.264940393  | 7.974587308  | 8.684234223  |
| 7286 | 6.930683186  | 6.1928549 | 7.668511469  | 6.705512608  | 6.002129064  | 7.408896153  |
| 7289 | 7.344003864  | 7.352529  | 7.335478698  | 6.810957895  | 6.841511354  | 6.780404436  |

|      |              |           |              |              |              |              |
|------|--------------|-----------|--------------|--------------|--------------|--------------|
| 7292 | 8.936613718  | 0.9574007 | 4.947007189  | -0.352108471 | -0.352108471 | -0.352108471 |
| 7294 | -0.352108471 | -0.352108 | -0.352108471 | 5.277395142  | 5.923493182  | 6.569591222  |
| 7295 | 7.052459646  | 6.9265588 | 6.800657921  | 7.961080764  | 8.370710556  | 8.780340347  |
| 7296 | 7.425791085  | 6.7871341 | 6.14847706   | 9.907283014  | 9.3664905    | 9.636886757  |
| 7298 | 4.966092901  | 6.1215288 | 7.276964637  | 6.095329071  | 8.942912819  | 7.519120945  |
| 7311 | 7.368619468  | 7.2800943 | 7.191569218  | 8.693981313  | 8.767224449  | 8.620738177  |
| 7314 | 8.446342835  | 7.4955332 | 7.970938036  | 8.208067203  | 9.264330737  | 8.73619897   |
| 7316 | 8.553684447  | 5.1773389 | 11.93002997  | 9.241418998  | 8.694420313  | 9.788417683  |
| 7317 | 6.763107369  | 6.3180937 | 5.873079992  | 9.252167651  | 9.533149308  | 9.814130964  |
| 7319 | -0.352108471 | -0.352108 | -0.352108471 | 6.577767658  | 5.427760889  | 7.727774428  |
| 7320 | 2.135660902  | 9.0381515 | 5.586906204  | 5.826844382  | 8.224598207  | 7.025721295  |
| 7321 | 6.875645566  | 6.2112364 | 5.854214789  | -0.352108471 | -0.352108471 | -0.352108471 |
| 7322 | 6.121528769  | 6.1000409 | 6.143016668  | -0.352108471 | -0.352108471 | -0.352108471 |
| 7323 | 6.332466669  | 6.7703105 | 5.894622816  | -0.352108471 | -0.352108471 | -0.352108471 |
| 7325 | -0.352108471 | -0.352108 | -0.352108471 | 4.989485442  | 4.330629937  | 4.66005769   |
| 7326 | 1.270183879  | 1.3921092 | 1.514034619  | 6.479260377  | 4.979472145  | 7.979048608  |
| 7327 | 6.294619744  | 6.003122  | 6.586117523  | 8.495226501  | 7.094346957  | 5.693467413  |
| 7328 | 9.28884147   | 8.1415292 | 6.994217001  | 7.551136183  | 7.547185881  | 7.555086485  |
| 7329 | -0.352108471 | -0.352108 | -0.352108471 | 4.179448717  | 6.502347686  | 8.825246654  |
| 7332 | 6.861057494  | 6.1604088 | 7.561706215  | 8.533000693  | 8.32726194   | 8.738739445  |
| 7334 | 7.395245316  | 4.7863714 | 6.090808341  | 7.01393143   | 4.896504602  | 5.955218016  |
| 7335 | -0.352108471 | -0.352108 | -0.352108471 | 2.594960553  | 3.626133664  | 4.657306774  |
| 7336 | -0.352108471 | -0.352108 | -0.352108471 | 7.930567891  | 4.996781939  | 6.463674915  |
| 7341 | -0.352108471 | -0.352108 | -0.352108471 | 7.987794345  | 5.800151118  | 6.893972732  |
| 7343 | 7.098170024  | 4.0029292 | 5.550549618  | 5.097937396  | 5.800022145  | 5.44897977   |
| 7345 | 6.815431805  | 6.816905  | 6.81837828   | 10.3208556   | 6.498307495  | 8.409581547  |
| 7347 | 5.939192221  | 5.4151493 | 6.463235152  | -0.352108471 | -0.352108471 | -0.352108471 |
| 7348 | 7.249349515  | 5.8722086 | 8.626490441  | 6.841075177  | 6.115155073  | 6.478115125  |
| 7351 | -0.352108471 | -0.352108 | -0.352108471 | 2.221964512  | 2.252618212  | 2.191310813  |
| 7353 | -0.352108471 | -0.352108 | -0.352108471 | 6.564571166  | 7.724029065  | 7.144300116  |
| 7358 | 8.621879677  | 3.4540835 | 6.03798158   | 6.513676419  | 5.541007941  | 4.568339463  |
| 7360 | -0.352108471 | -0.352108 | -0.352108471 | 6.800715119  | 8.837669995  | 4.763760243  |
| 7363 | 6.339543069  | 5.9200251 | 6.759061079  | 1.158617076  | 0.440372779  | 1.876861374  |
| 7366 | 2.370418305  | 6.9221181 | 4.64626819   | 5.519980446  | 1.796938968  | -1.92610251  |
| 7368 | 3.064174529  | 8.7364102 | 5.90029238   | -0.352108471 | -0.352108471 | -0.352108471 |
| 7375 | 4.534386     | 6.1320496 | 7.729713276  | 3.80159353   | 3.422845765  | 4.180341295  |
| 7376 | 4.728185378  | 7.6077482 | 6.167966808  | 7.247844574  | 6.544730233  | 7.950958916  |
| 7378 | 4.381407216  | 3.9195059 | 4.843308497  | -0.352108471 | -0.352108471 | -0.352108471 |
| 7380 | -0.352108471 | -0.352108 | -0.352108471 | 3.216713966  | 2.802945389  | 2.389176811  |
| 7381 | 5.11786691   | 7.4889632 | 6.303415073  | 5.342108584  | 9.058528308  | 7.200318446  |
| 7384 | 7.286736274  | 8.0381622 | 7.662449217  | 9.327273848  | 8.1697764    | 7.012278953  |
| 7385 | 5.55876787   | 5.5882244 | 5.529311366  | 5.596916991  | 5.605609608  | 5.588224375  |
| 7386 | 7.277956255  | 6.0703015 | 6.674128879  | 6.309768201  | 6.912001184  | 7.514234166  |
| 7388 | 6.303461245  | 3.2548561 | 9.352066383  | 5.231758803  | 1.93776702   | 3.584762911  |
| 7389 | -0.352108471 | -0.352108 | -0.352108471 | 6.290961884  | 6.12990004   | 5.968838196  |
| 7390 | 7.052946286  | 6.4929079 | 7.612984637  | -0.352108471 | -0.352108471 | -0.352108471 |
| 7391 | 2.652337612  | 1.2407682 | 1.946552907  | 4.49290523   | 4.598205038  | 4.387605422  |

|      |              |           |              |              |              |              |
|------|--------------|-----------|--------------|--------------|--------------|--------------|
| 7392 | 5.354685649  | 5.3835036 | 5.325867653  | 5.393523004  | 5.383503645  | 5.403542364  |
| 7398 | 5.919459543  | 8.0259638 | 3.812955333  | 6.204656258  | 7.032262505  | 5.377050011  |
| 7399 | 2.711561556  | 1.5251106 | 3.898012544  | 3.367655385  | 3.449520541  | 3.285790229  |
| 7402 | 4.870731848  | 6.3741369 | 5.622434355  | 7.266128842  | 5.325958889  | 6.296043865  |
| 7403 | -0.352108471 | -0.352108 | -0.352108471 | 3.141091639  | 4.977710418  | 6.814329197  |
| 7407 | 5.858933008  | 5.7155573 | 6.002308672  | -0.352108471 | -0.352108471 | -0.352108471 |
| 7408 | 9.723300333  | 8.6346034 | 7.545906481  | 9.382454464  | 7.559057303  | 8.470755883  |
| 7410 | 4.142690079  | 5.1522471 | 6.161804148  | 7.184674008  | 6.159075269  | 6.671874638  |
| 7411 | 3.429836003  | 3.3654516 | 3.397643806  | 5.188303169  | 6.32531018   | 7.462317192  |
| 7414 | 7.782452578  | 7.8794708 | 7.830961702  | 6.973109567  | 8.426324173  | 9.879538778  |
| 7415 | 7.239677489  | 7.5511362 | 7.862594877  | 8.452117188  | 7.802806691  | 8.12746194   |
| 7416 | 7.930905526  | 4.8074077 | 6.369156591  | 8.989818148  | 7.910012046  | 6.830205944  |
| 7417 | 6.979737572  | 6.9747788 | 6.977258204  | 5.198050748  | 9.758874274  | 7.478462511  |
| 7419 | 4.094682292  | 6.3968684 | 8.699054473  | 7.711446746  | 6.061774144  | 6.886610445  |
| 7423 | 6.640019393  | 4.9272166 | 8.352822191  | 4.369524912  | 3.763742066  | 3.15795922   |
| 7424 | 3.127737875  | 3.136327  | 3.119148782  | 6.468151867  | 6.515031054  | 6.421272681  |
| 7430 | 7.839605601  | 8.4384159 | 9.037226188  | 4.426152912  | 5.832719245  | 4.239285578  |
| 7431 | 8.871947265  | 11.747888 | 11.80991768  | 12.4424511   | 9.810122031  | 15.07478016  |
| 7434 | 7.334003235  | 5.7669298 | 4.199856278  | 3.596060105  | 1.876861374  | 5.315258837  |
| 7442 | 7.376787373  | 7.1930265 | 7.560548258  | 4.888253807  | 4.186919329  | 3.485584851  |
| 7444 | -0.352108471 | -0.352108 | -0.352108471 | 6.577483275  | 8.38431063   | 4.770655921  |
| 7450 | 4.889217569  | 3.7419335 | 4.315575532  | 4.256375256  | 7.711098168  | 5.983736712  |
| 7453 | 4.809842661  | 5.9391922 | 7.068541782  | 1.968661759  | 1.997577452  | 1.939746065  |
| 7458 | 7.415794329  | 8.8151833 | 6.016405367  | 10.56058913  | 8.768101402  | 6.975613677  |
| 7461 | 6.112030716  | 5.7663537 | 5.939192221  | 7.014742575  | 4.362502719  | 5.688622647  |
| 7464 | 7.08718283   | 7.0919708 | 7.082394844  | 3.472122176  | 4.843308497  | 2.100935855  |
| 7466 | 6.685233471  | 7.9827771 | 7.334005289  | 6.529591207  | 6.590236847  | 6.650882486  |
| 7468 | 6.78242301   | 5.6417115 | 4.501000046  | -0.352108471 | -0.352108471 | -0.352108471 |
| 7469 | 2.481575183  | 5.3152588 | -0.352108471 | -0.352108471 | -0.352108471 | -0.352108471 |
| 7474 | 5.951362351  | 6.8312892 | 7.711216064  | 6.866733042  | 8.452492173  | 5.28097391   |
| 7477 | 5.821546955  | 9.6151286 | 7.718337775  | 8.94535663   | 4.857978377  | 6.901667503  |
| 7486 | -0.352108471 | -0.352108 | -0.352108471 | 6.214589741  | 5.362598742  | 6.021365987  |
| 7494 | 2.539658743  | 3.715817  | 3.127737875  | 4.0073791    | 6.849654667  | 9.691930233  |
| 7514 | 7.614452799  | 8.2505133 | 6.978392261  | 7.750727179  | 4.812640868  | 6.281684024  |
| 7516 | 9.374892375  | 5.72738   | 7.551136183  | 7.014362816  | 7.212682058  | 7.4110013    |
| 7518 | -0.352108471 | -0.352108 | -0.352108471 | 6.204656258  | 6.777272313  | 5.632040203  |
| 7520 | 5.779310544  | 6.4685941 | 7.157877604  | 7.192082458  | 9.077996786  | 8.135039622  |
| 7525 | 8.304800241  | 8.1872605 | 8.422340024  | 3.169443478  | 5.086096378  | 2.002749278  |
| 7528 | -0.352108471 | -0.847104 | -0.479940479 | 1.411143941  | 4.967105233  | 8.523066524  |
| 7529 | 5.939192221  | 6.7638029 | 5.11458153   | 7.601051706  | 7.974870977  | 7.227232435  |
| 7531 | 5.002635162  | 6.2125362 | 7.422437256  | 8.447789726  | 4.711260295  | 12.18431916  |
| 7532 | -0.352108471 | -0.352108 | -0.352108471 | 6.544687493  | 7.374725876  | 8.204764258  |
| 7533 | 7.151993326  | 7.0273758 | 6.90275822   | 6.920260803  | 7.872600424  | 8.824940044  |
| 7534 | 8.684506271  | 8.521769  | 8.359031806  | 8.832507181  | 11.29322732  | 6.371787037  |
| 7536 | 5.688622647  | 5.7155573 | 5.661687951  | 7.700335208  | 7.692669739  | 7.708000677  |
| 7538 | 6.888413829  | 6.2584133 | 7.518414344  | 6.365745775  | 5.233567424  | 4.101389072  |
| 7542 | 5.718459767  | 5.7752316 | 5.661687951  | 5.983736712  | 6.002308672  | 5.965164752  |



|      |              |           |              |              |              |              |
|------|--------------|-----------|--------------|--------------|--------------|--------------|
| 7543 | 6.23156194   | 6.1079622 | 6.355161685  | 6.560527001  | 6.532588736  | 6.588465267  |
| 7547 | -0.352108471 | -0.352108 | -0.352108471 | 5.821410838  | 5.292050137  | 6.350771539  |
| 7549 | 7.936330313  | 10.147478 | 5.725182209  | 6.94805115   | 7.14280972   | 7.33756829   |
| 7555 | 10.59487497  | 6.8846031 | 8.739739036  | 8.21671462   | 8.137575638  | 8.058436655  |
| 7556 | 8.653946329  | 2.9464532 | 5.800199788  | -0.352108471 | -0.352108471 | -0.352108471 |
| 7561 | -0.352108471 | -0.352108 | -0.352108471 | 2.169424975  | -0.161483164 | 4.500333114  |
| 7562 | 6.315832277  | 4.9894341 | 7.642230459  | 1.433785054  | 1.74784442   | 2.061903786  |
| 7581 | 2.711561556  | 5.7752316 | -0.352108471 | 0.440372779  | 0.440372779  | 0.440372779  |
| 7582 | 5.057341212  | 6.2145375 | 5.635939335  | 1.644875323  | 2.147539136  | 1.14221151   |
| 7586 | 6.091633494  | 7.5343218 | 8.977010038  | 9.169987063  | 6.522158346  | 3.87432963   |
| 7587 | 7.299617088  | 4.3708006 | 5.835208855  | 1.290035436  | 1.437859363  | 1.14221151   |
| 7592 | -0.352108471 | -0.352108 | -0.352108471 | 5.983736712  | 4.379078243  | 7.588395181  |
| 7594 | 6.70081996   | 6.8767254 | 6.524914536  | 3.776897663  | 1.807952763  | 5.745842563  |
| 7596 | 6.167582836  | 7.2067514 | 5.128414275  | -0.352108471 | -0.352108471 | -0.352108471 |
| 7620 | 8.569387437  | 9.8410775 | 7.297697327  | 5.399644331  | 11.25814164  | 8.328892986  |
| 7621 | 5.639942626  | 5.1526923 | 5.396317463  | 2.743924656  | 3.763444409  | 4.782964162  |
| 7626 | 4.322753636  | 4.8786655 | 5.434577321  | -0.352108471 | -0.352108471 | -0.352108471 |
| 7629 | -0.352108471 | -0.352108 | -0.352108471 | 6.663549981  | 4.297639083  | 1.931728184  |
| 7634 | 4.696178549  | 7.0297028 | 5.862940659  | 4.282217916  | 6.965910998  | 5.624064457  |
| 7637 | 3.067324044  | 4.8540291 | 3.960676558  | 5.423367233  | 5.125330896  | 5.274349064  |
| 7644 | 6.918309499  | 7.941723  | 5.894896006  | 7.677203728  | 3.273687448  | 5.475445588  |
| 7652 | 6.261564247  | 6.1679668 | 6.355161685  | 2.130680146  | 3.119148782  | 1.14221151   |
| 7692 | -0.352108471 | -0.352108 | -0.352108471 | 5.059845876  | 6.907627548  | 5.983736712  |
| 7695 | 3.137029745  | -0.352108 | 6.626167961  | -0.352108471 | -0.352108471 | -0.352108471 |
| 7706 | -0.352108471 | -0.352108 | -0.352108471 | 7.240736817  | 6.497182024  | 5.753627231  |
| 7716 | 7.661201642  | 8.3951328 | 6.927270497  | 6.769641641  | 7.835395748  | 5.703887534  |
| 7726 | 6.151585628  | 4.6721097 | 7.631061543  | 5.595674035  | 9.75048434   | 7.673079188  |
| 7727 | -0.352108471 | -0.352108 | -0.352108471 | 8.05826446   | 6.769641641  | 5.481018822  |
| 7728 | 6.471312114  | 5.5389635 | 7.403660712  | 2.653660277  | 4.016045771  | 5.378431265  |
| 7739 | -0.352108471 | -0.352108 | -0.352108471 | 5.284974356  | 7.077174255  | 3.492774457  |
| 7741 | 8.472062733  | 6.5905083 | 4.708953875  | -0.352108471 | -0.352108471 | -0.352108471 |
| 7745 | 2.681724436  | 1.9642013 | 3.399247549  | 7.10995036   | 5.051993053  | 2.994035746  |
| 7750 | 6.953114539  | 6.3269242 | 6.640019393  | -0.352108471 | -0.352108471 | -0.352108471 |
| 7753 | 6.502263028  | 6.1919279 | 6.812598199  | 1.371545024  | 1.437859363  | 1.305230684  |
| 7754 | 6.596957353  | 3.4009836 | 4.998970473  | 0.624614178  | 0.440372779  | 0.808855576  |
| 7756 | -0.352108471 | -0.352108 | -0.352108471 | 6.836610872  | 5.458255064  | 4.079899256  |
| 7760 | 4.156182401  | 4.2016175 | 4.178899946  | 6.359270363  | 6.548307945  | 6.170232782  |
| 7762 | -0.352108471 | -0.352108 | -0.352108471 | 7.389650362  | 4.722457636  | 6.056053999  |
| 7763 | 6.948800955  | 7.1846284 | 6.712973472  | 9.199084805  | 5.782227182  | 7.490655993  |
| 7767 | 3.409093945  | 5.3205632 | 7.232032546  | -0.352108471 | -0.352108471 | -0.352108471 |
| 7775 | -0.352108471 | -0.352108 | -0.352108471 | 4.954669547  | 5.095423988  | 5.236178429  |
| 7782 | 4.064017356  | 5.1171159 | 6.170214371  | 0.872801732  | 0.440372779  | 1.305230684  |
| 7784 | 5.59790927   | 5.3152588 | 5.880559702  | -0.352108471 | -0.352108471 | -0.352108471 |
| 7791 | 9.306885836  | 8.305921  | 10.30785065  | 9.985337343  | 11.93112203  | 8.039552661  |
| 7799 | 1.783698732  | -0.352108 | 3.919505936  | 4.97366118   | 5.529311366  | 6.084961552  |
| 7803 | 7.485956147  | 7.8380562 | 7.133856128  | -0.352108471 | -0.352108471 | -0.352108471 |
| 7805 | -0.352108471 | -0.352108 | -0.352108471 | 4.80208491   | 5.050021546  | 4.554148274  |

|      |              |           |              |              |              |              |
|------|--------------|-----------|--------------|--------------|--------------|--------------|
| 7812 | -0.352108471 | -0.352108 | -0.352108471 | 7.69442279   | 8.147174035  | 8.599925279  |
| 7813 | 4.889218131  | 6.9235485 | 5.906383311  | 5.988664101  | 4.889986617  | 7.087341585  |
| 7818 | 5.493783215  | 6.4543531 | 4.533213306  | 4.691916222  | 5.410759683  | 3.97307276   |
| 7827 | 5.522228925  | 5.7280926 | 5.625160771  | -0.352108471 | -0.352108471 | -0.352108471 |
| 7837 | 8.233257672  | 6.0421972 | 7.137727412  | 8.012044455  | 6.886095759  | 5.760147063  |
| 7840 | 8.006374658  | 5.0894122 | 2.172449746  | -0.352108471 | -0.352108471 | -0.352108471 |
| 7846 | -0.352108471 | -0.352108 | -0.352108471 | 5.986268786  | 7.713912149  | 9.441555512  |
| 7849 | 3.364953967  | 9.8821279 | 6.623540933  | 0.440372779  | 0.440372779  | 0.440372779  |
| 7851 | 7.048158978  | 6.6168926 | 6.185626278  | 10.6534243   | 3.652638077  | 7.153031188  |
| 7852 | 6.488464425  | 3.0961429 | 4.792303669  | -0.352108471 | -0.352108471 | -0.352108471 |
| 7866 | 6.788420481  | 6.2558263 | 7.321014647  | 5.898722313  | 8.975446507  | 7.43708441   |
| 7871 | -0.352108471 | -0.352108 | -0.352108471 | 4.547696525  | 6.345275458  | 8.14285439   |
| 7873 | 5.02423831   | 7.374953  | 6.199595632  | 6.525425359  | 6.885149665  | 6.705287512  |
| 7874 | 9.374134794  | 6.2885109 | 3.20288694   | 6.545950789  | 5.890936224  | 7.200965353  |
| 7879 | 5.086953883  | 6.4118503 | 5.749402114  | 9.621468609  | 8.305994833  | 6.990521057  |
| 7884 | -0.352108471 | -0.352108 | -0.352108471 | 5.661770766  | 5.785200266  | 5.723485516  |
| 7905 | 7.251757684  | 6.4599337 | 8.043581665  | 4.819995464  | 9.404164901  | 7.112080183  |
| 7913 | -0.352108471 | -0.352108 | -0.352108471 | 5.247084775  | 7.510362796  | 9.773640817  |
| 7915 | 6.571079922  | 6.5532966 | 6.562188268  | 2.681798769  | 2.546625611  | 2.411452453  |
| 7916 | 7.906194427  | 6.663797  | 9.148591903  | 6.967894694  | 9.575738644  | 8.271816669  |
| 7917 | 1.762940593  | 1.0212779 | 1.392109249  | 5.537748484  | 7.074497347  | 6.306122915  |
| 7918 | 5.545947536  | 5.6886226 | 5.831297758  | -0.352108471 | -0.352108471 | -0.352108471 |
| 7922 | 8.968935914  | 5.4025961 | 7.185765998  | 6.693937107  | 7.383419948  | 6.004454266  |
| 7936 | -0.352108471 | -0.352108 | -0.352108471 | 9.017100968  | 5.837496104  | 7.427298536  |
| 7955 | 4.811712164  | 4.4254169 | 4.618564529  | 0.228373553  | -0.352108471 | 0.808855576  |
| 7965 | -0.352108471 | -0.352108 | -0.352108471 | 5.712263427  | 6.324418     | 5.100108855  |
| 7976 | 8.82249698   | 7.9996506 | 7.176804283  | 5.636571956  | 4.439548204  | 5.03806008   |
| 7979 | -0.352108471 | -0.352108 | -0.352108471 | 6.32531018   | 7.046398208  | 5.604222153  |
| 7982 | 1.946552907  | 4.2452143 | -0.352108471 | 2.118278685  | 2.686833264  | 1.549724107  |
| 7988 | 4.812830099  | 5.2849744 | 5.757118613  | -0.352108471 | -0.352108471 | -0.352108471 |
| 7991 | 9.178857366  | 3.3052392 | 6.242048279  | 7.209478834  | 5.365330774  | 9.053626895  |
| 8013 | 5.670355529  | 6.572702  | 6.121528769  | -0.352108471 | -0.352108471 | -0.352108471 |
| 8022 | 8.353726476  | 4.9945313 | 6.674128879  | -0.352108471 | -0.352108471 | -0.352108471 |
| 8027 | 3.515141236  | 6.1721123 | 0.858170134  | 6.056053999  | 3.794790437  | 8.317317561  |
| 8029 | 6.801857078  | 4.3807541 | 5.591305588  | 2.272836381  | 3.615460478  | 0.930212283  |
| 8030 | -0.352108471 | -0.352108 | -0.352108471 | 5.809398431  | 5.859617369  | 5.909836307  |
| 8031 | -0.352108471 | -0.352108 | -0.352108471 | 3.827292409  | 5.284974356  | 6.742656303  |
| 8045 | -0.352108471 | -0.352108 | -0.352108471 | 5.169157826  | 5.191222747  | 5.147092904  |
| 8050 | -0.352108471 | -0.352108 | -0.352108471 | 4.806952735  | 8.837464919  | 6.822208827  |
| 8061 | 6.955397734  | 7.6725705 | 7.313984131  | 5.533057745  | 7.15770761   | 8.782357475  |
| 8073 | 5.089412202  | 4.7869486 | 5.391875808  | 8.031351006  | 7.329088911  | 6.626826816  |
| 8076 | 6.466934042  | 8.3193274 | 7.393130705  | 3.156150334  | 3.500702413  | 3.845254491  |
| 8078 | 8.871899983  | 5.499632  | 7.185765998  | 7.947813531  | 8.59861235   | 9.249411169  |
| 8079 | 5.683083302  | 5.0894122 | 4.495741102  | 9.006475171  | 8.558877279  | 8.111279388  |
| 8085 | 7.15770761   | 4.5389014 | 9.776513799  | 5.095423988  | 1.818892945  | 8.371955031  |
| 8087 | 7.042523083  | 7.7422973 | 6.3427489    | 5.202626588  | 5.458255064  | 5.71388354   |
| 8091 | 5.652271474  | 8.5448167 | 2.759726277  | 1.227667732  | 1.646479888  | 0.808855576  |

|      |              |           |              |              |              |              |
|------|--------------|-----------|--------------|--------------|--------------|--------------|
| 8099 | -0.352108471 | -0.352108 | -0.352108471 | 7.856765125  | 7.714895119  | 7.573025113  |
| 8110 | 8.490284424  | 6.9527073 | 5.415130253  | -0.352108471 | -0.352108471 | -0.352108471 |
| 8125 | 5.211255078  | 5.1522471 | 5.093239148  | 2.481575183  | 5.315258837  | -0.352108471 |
| 8131 | 7.466207166  | 6.7844221 | 8.147992266  | 5.486076511  | 5.596916991  | 5.707757471  |
| 8139 | 5.575838517  | 5.2809492 | 5.428393874  | -0.352108471 | -0.352108471 | -0.352108471 |
| 8140 | 8.408533238  | 7.3777551 | 6.346977029  | 7.002712288  | 9.695935916  | 8.349324102  |
| 8148 | 5.90029238   | 6.8892533 | 4.911331493  | 7.467246872  | 6.860007601  | 8.074486143  |
| 8153 | 5.608777454  | 6.2671463 | 6.925515208  | 6.72865797   | 6.218762094  | 7.238553846  |
| 8170 | 5.527638398  | 4.7559934 | 6.2992834    | -0.352108471 | -0.352108471 | -0.352108471 |
| 8175 | 3.676426169  | 3.9349025 | 3.805664353  | 6.907463027  | 9.810731119  | 4.004194936  |
| 8189 | 6.005735869  | 8.4977795 | 7.251757684  | 8.143484057  | 4.426487714  | 11.8604804   |
| 8192 | 6.687972707  | 8.2448542 | 9.801735739  | 2.252618212  | 2.252618212  | 2.252618212  |
| 8202 | -0.352108471 | -0.352108 | -0.352108471 | 5.751745665  | 5.656924845  | 5.704335255  |
| 8204 | -0.352108471 | -0.352108 | -0.352108471 | 6.633874018  | 6.469622303  | 6.55174816   |
| 8208 | -0.352108471 | -0.352108 | -0.352108471 | 6.266367194  | 6.214565395  | 6.318168992  |
| 8216 | 5.421815342  | 6.3034612 | 7.185107148  | -0.352108471 | -0.352108471 | -0.352108471 |
| 8220 | 5.569205318  | 5.5913056 | 5.613405859  | -0.352108471 | -0.352108471 | -0.352108471 |
| 8224 | 8.583527785  | 9.1878548 | 9.792181849  | 8.029024031  | 6.382429697  | 4.735835364  |
| 8226 | -0.352108471 | -0.352108 | -0.352108471 | 5.484671023  | 7.145791238  | 6.31523113   |
| 8228 | 6.055892079  | 6.2312245 | 5.880559702  | 3.248916248  | 4.245214285  | 2.252618212  |
| 8233 | -0.352108471 | -0.352108 | -0.352108471 | 6.696534724  | 6.56915909   | 6.441783456  |
| 8237 | 5.345349382  | 6.1995956 | 7.053841881  | 4.069694683  | 6.660105502  | 1.479283864  |
| 8239 | 5.697485036  | 6.2061804 | 6.714875854  | 7.728051932  | 8.100533976  | 8.47301602   |
| 8242 | 2.601256156  | 5.7565437 | 4.178899946  | 5.615364839  | 7.97826492   | 6.796814879  |
| 8243 | -0.352108471 | -0.352108 | -0.352108471 | 1.366179719  | 7.54759268   | 4.456886199  |
| 8260 | 3.46119715   | 6.4636749 | 9.466152679  | 7.744466355  | 7.604813664  | 7.465160974  |
| 8263 | 1.829978742  | 2.7365298 | 3.643080779  | 5.369332089  | 5.261950251  | 5.476713926  |
| 8273 | -0.352108471 | -0.352108 | -0.352108471 | 6.10626679   | 3.390217934  | 8.822315646  |
| 8288 | 5.003306707  | 6.4358233 | 5.719564994  | -0.352108471 | -0.352108471 | -0.352108471 |
| 8289 | 5.217491139  | 4.0200646 | 6.41491772   | 7.076248058  | 6.56915909   | 6.062070121  |
| 8291 | -0.352108471 | -0.352108 | -0.352108471 | 2.47172199   | 2.077309423  | 2.274515706  |
| 8292 | -0.352108471 | -0.352108 | -0.352108471 | 5.723485516  | 5.776232748  | 5.670738284  |
| 8301 | 3.805664353  | 4.0053499 | 3.605978805  | 7.318035473  | 8.897018532  | 8.107527003  |
| 8310 | 2.38621749   | -0.352108 | 5.124543452  | 2.492032424  | 5.336173319  | -0.352108471 |
| 8312 | 6.984847274  | 5.4283939 | 3.871940474  | 7.570669745  | 6.091438869  | 6.831054307  |
| 8314 | -0.352108471 | -0.352108 | -0.352108471 | 4.569595785  | 5.637296679  | 6.704997573  |
| 8315 | -0.352108471 | -0.352108 | -0.352108471 | 5.663737322  | 5.931069616  | 5.396405027  |
| 8318 | -0.352108471 | -0.352108 | -0.352108471 | 5.939192221  | 5.958359385  | 5.920025058  |
| 8322 | 6.053362071  | 4.5468593 | 7.559864837  | 5.086878564  | 5.345666926  | 5.604455288  |
| 8324 | 6.613499849  | 6.349548  | 6.481523945  | -0.352108471 | -0.352108471 | -0.352108471 |
| 8326 | -0.352108471 | -0.352108 | -0.352108471 | 2.902991023  | 3.119148782  | 2.686833264  |
| 8332 | 6.768938711  | 6.2704092 | 6.519673958  | -0.352108471 | -0.352108471 | -0.352108471 |
| 8336 | 6.151585628  | 6.1679668 | 6.135204448  | -0.352108471 | -0.352108471 | -0.352108471 |
| 8394 | -0.352108471 | -0.352108 | -0.352108471 | 5.834905668  | 9.602153462  | 7.718529565  |
| 8396 | 7.564006467  | 6.6103592 | 7.08718283   | 4.365930238  | 3.919505936  | 3.473081633  |
| 8402 | -0.352108471 | -0.352108 | -0.352108471 | 0.849500091  | -0.352108471 | 2.051108653  |
| 8405 | 4.967066095  | 5.6982657 | 4.235866508  | -0.352108471 | -0.352108471 | -0.352108471 |

|      |              |           |              |              |              |              |
|------|--------------|-----------|--------------|--------------|--------------|--------------|
| 8407 | 10.0436998   | 7.6937134 | 8.868706618  | 8.496131023  | 9.35049936   | 10.2048677   |
| 8409 | 3.702006037  | 6.2125362 | 8.723066381  | 5.815475722  | 3.942292236  | 7.688659208  |
| 8420 | 5.270651934  | 4.3990075 | 3.527362986  | 0.289051906  | -0.352108471 | 0.930212283  |
| 8425 | -0.352108471 | -0.352108 | -0.352108471 | 7.323993398  | 3.736882973  | 10.91110382  |
| 8427 | 3.829869794  | 2.425606  | 3.127737875  | 4.476918793  | 5.637296679  | 6.797674564  |
| 8428 | -0.352108471 | -0.352108 | -0.352108471 | 6.682822443  | 5.656080167  | 7.709564718  |
| 8436 | 4.855447759  | 5.3546856 | 5.853923539  | -0.352108471 | -0.352108471 | -0.352108471 |
| 8438 | 1.383520155  | 2.357098  | 3.119148782  | -0.352108471 | -0.352108471 | -0.352108471 |
| 8439 | 6.890924634  | 7.0919708 | 6.689878453  | -0.352108471 | -0.352108471 | -0.352108471 |
| 8449 | -0.352108471 | -0.352108 | -0.352108471 | 2.179939357  | 1.306251685  | 3.05362703   |
| 8450 | 6.433318728  | 6.4453648 | 6.421272681  | 6.463674915  | 6.479332994  | 6.448016836  |
| 8451 | 5.800199788  | 5.9243692 | 5.676030376  | 4.877471268  | 9.680009482  | 7.278740375  |
| 8452 | 7.805419383  | 5.619404  | 9.991434722  | 7.86582773   | 6.936969129  | 8.794686331  |
| 8454 | -0.352108471 | -0.352108 | -0.352108471 | 9.03484597   | 5.603051715  | 7.318948842  |
| 8460 | -0.352108471 | -0.352108 | -0.352108471 | 8.268076885  | 5.017136436  | 1.766195986  |
| 8463 | -0.352108471 | -0.352108 | -0.352108471 | 6.992632695  | 6.606745784  | 6.220858873  |
| 8471 | 6.874586128  | 4.9944242 | 8.754748025  | -0.352108471 | -0.352108471 | -0.352108471 |
| 8477 | 6.947006362  | 6.0449945 | 7.849018203  | 4.36678506   | 4.108072315  | 3.84935957   |
| 8479 | 7.042523083  | 6.779279  | 7.30576713   | -0.352108471 | -0.352108471 | -0.352108471 |
| 8481 | -0.352108471 | -0.352108 | -0.352108471 | 3.130821893  | 3.919505936  | 4.708189978  |
| 8482 | -0.352108471 | -0.352108 | -0.352108471 | 5.280401645  | 5.789762726  | 6.299123807  |
| 8483 | 0.965727592  | 4.140419  | 2.553073296  | -0.352108471 | -0.352108471 | -0.352108471 |
| 8491 | -0.352108471 | -0.352108 | -0.352108471 | 2.38621749   | 2.122666746  | 2.649768234  |
| 8492 | 2.77514947   | 3.1345327 | 2.954841066  | -0.352108471 | -0.352108471 | -0.352108471 |
| 8493 | 4.600268283  | 5.8369584 | 7.073648445  | 0.29941874   | 3.197122757  | 1.748270748  |
| 8496 | 6.649748172  | 7.5749394 | 8.500130582  | 5.231429669  | 5.895191162  | 6.558952656  |
| 8498 | 5.777785791  | 6.7422729 | 6.260029354  | 6.87306658   | 6.705113583  | 7.041019578  |
| 8500 | 2.971767785  | 5.9002924 | 8.828816976  | -0.352108471 | -0.352108471 | -0.352108471 |
| 8502 | -0.352108471 | -0.352108 | -0.352108471 | 6.609543024  | 4.348681051  | 8.870404996  |
| 8516 | 3.127737875  | 3.136327  | 3.119148782  | 2.903700168  | 2.252618212  | 3.554782125  |
| 8517 | -0.352108471 | -0.352108 | -0.352108471 | 1.245740716  | 0.440372779  | 2.051108653  |
| 8519 | 7.949286752  | 7.9102616 | 7.988311912  | 2.501526031  | -0.352108471 | 5.355160532  |
| 8522 | 5.928731366  | 6.395997  | 6.863262576  | 3.691912836  | 6.307268721  | 8.922624606  |
| 8525 | 6.266052353  | 6.8818856 | 6.573968999  | 6.022050925  | 4.202080518  | 7.842021332  |
| 8526 | 7.117674405  | 5.1544854 | 3.191296423  | 3.442948713  | 5.336173319  | 1.549724107  |
| 8527 | 5.970796616  | 5.6109164 | 5.790856505  | -0.352108471 | -0.352108471 | -0.352108471 |
| 8531 | 6.317834233  | 3.3638818 | 9.271786639  | 6.689327433  | 4.46264002   | 5.575983727  |
| 8533 | -0.352108471 | -0.352108 | -0.352108471 | 6.570311461  | 6.223425304  | 6.396868383  |
| 8534 | 4.81534536   | 2.4335672 | 3.624456288  | 5.345910491  | 5.809594275  | 6.273278059  |
| 8535 | 3.369288587  | 9.7054789 | 6.537383725  | 6.571854611  | 5.233567424  | 3.895280236  |
| 8537 | 4.381407216  | 6.0042448 | 2.75856961   | 1.3309757    | 1.731739118  | 0.930212283  |
| 8539 | -0.352108471 | -0.352108 | -0.352108471 | 6.596757815  | 6.617035395  | 6.576480236  |
| 8543 | 6.020381091  | 7.5058983 | 4.534863919  | 6.513690968  | 6.019409619  | 5.525128271  |
| 8545 | -0.352108471 | -0.352108 | -0.352108471 | 5.017136436  | 5.054280952  | 4.979991919  |
| 8548 | 5.380082893  | 6.2420483 | 7.104013665  | -0.352108471 | -0.352108471 | -0.352108471 |
| 8551 | 7.30087348   | 5.8021647 | 6.551519093  | 6.07919154   | 5.775231583  | 6.383151496  |
| 8552 | 3.127737875  | 3.136327  | 3.119148782  | 1.651404068  | 1.305230684  | 1.997577452  |

|      |              |           |              |              |              |              |
|------|--------------|-----------|--------------|--------------|--------------|--------------|
| 8553 | 5.07653385   | 7.850816  | 6.463674915  | 5.51140784   | 6.976601204  | 8.441794568  |
| 8560 | 8.450148986  | 6.8928603 | 5.335571552  | 5.740438674  | 7.70185263   | 6.721145652  |
| 8562 | 8.244445775  | 8.2249387 | 8.23469223   | 5.718205971  | 7.911884024  | 6.815044997  |
| 8565 | -0.352108471 | -0.352108 | -0.352108471 | 8.682742619  | 7.329061379  | 8.005901999  |
| 8566 | 6.37650413   | 8.6508258 | 7.513664974  | 6.843135165  | 4.920273781  | 8.765996549  |
| 8568 | -0.352108471 | -0.352108 | -0.352108471 | 4.032813514  | 4.178899946  | 4.324986377  |
| 8569 | 5.045025943  | 3.7815658 | 6.308486129  | -0.352108471 | -0.352108471 | -0.352108471 |
| 8570 | 7.551014561  | 8.6967105 | 9.842406356  | 7.832756024  | 7.021841047  | 7.427298536  |
| 8572 | 6.042247545  | 6.5566899 | 7.071132258  | 7.223134165  | 7.222661978  | 7.222189791  |
| 8573 | 3.127737875  | 3.1687987 | 3.086677097  | 2.169424975  | 3.14822909   | 1.190620859  |
| 8574 | 6.658023207  | 3.2925403 | 10.02350609  | 1.400698343  | -0.352108471 | 3.153505157  |
| 8575 | -0.352108471 | -0.352108 | -0.352108471 | 7.673079188  | 6.689576901  | 8.656581474  |
| 8576 | 6.020381091  | 6.3325422 | 5.708219959  | 0.077665561  | 3.676057187  | 1.876861374  |
| 8577 | -0.352108471 | -0.352108 | -0.352108471 | 4.736619762  | 1.75463195   | 3.245625856  |
| 8578 | 6.051754514  | 6.6415447 | 7.231334981  | 4.379148927  | 6.566987041  | 2.191310813  |
| 8603 | 2.711561556  | -0.352108 | 5.775231583  | -0.352108471 | -0.352108471 | -0.352108471 |
| 8607 | -0.352108471 | -0.352108 | -0.352108471 | 3.919505936  | 3.919505936  | 3.919505936  |
| 8611 | 6.087530678  | 5.9532315 | 6.020381091  | -0.352108471 | -0.352108471 | -0.352108471 |
| 8614 | 8.920617896  | 8.5161798 | 8.111741698  | 7.296097593  | 8.717991356  | 10.13988512  |
| 8615 | 2.079909098  | 8.0246263 | 5.052267685  | 6.549114467  | 6.244622298  | 6.396868383  |
| 8621 | -0.352108471 | -0.352108 | -0.352108471 | 5.958359385  | 5.377761049  | 6.53895772   |
| 8622 | -0.352108471 | -0.352108 | -0.352108471 | 5.017136436  | 3.348463442  | 6.68580943   |
| 8623 | -0.352108471 | -0.352108 | -0.352108471 | 6.08682898   | 7.221919407  | 4.951738553  |
| 8624 | -0.352108471 | -0.352108 | -0.352108471 | 0.762376451  | -0.352108471 | 1.876861374  |
| 8625 | 5.692087125  | 6.2685809 | 5.980334028  | 2.235698462  | 2.211943219  | 2.188187975  |
| 8632 | 5.413510577  | 4.1218461 | 2.830181656  | 0.044132154  | -0.352108471 | 0.440372779  |
| 8633 | -0.352108471 | -0.352108 | -0.352108471 | 4.280868658  | 6.544253517  | 5.412561087  |
| 8634 | 5.292949001  | 4.6531192 | 5.932778769  | 6.102961535  | 7.007811177  | 7.912660819  |
| 8635 | 3.805664353  | 3.9195059 | 3.69182277   | 5.095423988  | 5.124543452  | 5.066304524  |
| 8636 | -0.352108471 | -0.352108 | -0.352108471 | 6.401526885  | 7.047803158  | 6.724665022  |
| 8639 | 2.515697587  | 3.2955425 | 1.735852699  | -0.352108471 | -0.352108471 | -0.352108471 |
| 8642 | -0.352108471 | -0.352108 | -0.352108471 | 5.939192221  | 5.443601632  | 6.434782811  |
| 8644 | -0.352108471 | -0.352108 | -0.352108471 | 2.204376426  | -0.352108471 | 4.760861323  |
| 8649 | -0.352108471 | -0.352108 | -0.352108471 | 3.245625856  | 1.344198885  | 5.147052827  |
| 8653 | 4.583433279  | 4.1125856 | 5.054280952  | 4.186919329  | 3.119148782  | 5.254689875  |
| 8654 | -0.352108471 | -0.352108 | -0.352108471 | 7.775366346  | 6.479260377  | 5.183154407  |
| 8655 | 8.962798351  | 7.5062708 | 6.049743181  | 7.757808357  | 7.404776674  | 8.11084004   |
| 8658 | 6.483325563  | 5.5587679 | 4.634210177  | -0.352108471 | -0.352108471 | -0.352108471 |
| 8661 | 6.861057494  | 6.8767254 | 6.845389604  | 6.12990004   | 6.135204448  | 6.124595632  |
| 8662 | 6.370355426  | 6.6400194 | 6.909683359  | 5.427549346  | 7.326356364  | 9.225163383  |
| 8663 | -0.352108471 | -0.352108 | -0.352108471 | 6.27703705   | 3.391273426  | 4.834155238  |
| 8664 | 5.872522726  | 7.7880739 | 6.830298336  | 8.433479581  | 5.939192221  | 3.444904862  |
| 8665 | 8.576796965  | 6.7696416 | 4.962486317  | 9.028333354  | 7.277863047  | 8.1530982    |
| 8666 | -0.352108471 | -0.352108 | -0.352108471 | 6.636273252  | 9.392370402  | 3.880176102  |
| 8667 | 6.624807556  | 6.7871341 | 6.94946059   | 8.488193315  | 7.912102061  | 9.064284569  |
| 8668 | 7.121141731  | 7.3154815 | 6.926801914  | 6.344555562  | 6.174080069  | 6.515031054  |
| 8669 | 8.074241084  | 5.1074352 | 6.590838154  | 4.833742536  | 7.856808379  | 6.345275458  |

|      |              |           |              |              |              |              |
|------|--------------|-----------|--------------|--------------|--------------|--------------|
| 8671 | -0.352108471 | -0.352108 | -0.352108471 | 6.739871389  | 6.204656258  | 5.669441127  |
| 8672 | -0.352108471 | -0.352108 | -0.352108471 | 7.46159208   | 6.577483275  | 5.69337447   |
| 8674 | -0.352108471 | -0.352108 | -0.352108471 | -0.800236149 | 4.560713284  | 1.880238567  |
| 8675 | 7.009972231  | 8.9179049 | 7.963938574  | 6.344555562  | 7.985081128  | 4.704029995  |
| 8676 | 5.3562704    | 7.7175468 | 2.994993979  | 2.072558294  | 0.815227852  | 3.329888737  |
| 8677 | -0.352108471 | -0.352108 | -0.352108471 | 4.927679215  | 3.914731559  | 5.940626871  |
| 8678 | 7.150486084  | 6.483324  | 6.816905042  | -0.352108471 | -0.352108471 | -0.352108471 |
| 8682 | 9.112686581  | 8.9770872 | 9.248285985  | 9.169219801  | 8.157159713  | 7.145099625  |
| 8683 | 7.759258846  | 7.8991344 | 7.619383264  | 7.667232662  | 7.641795584  | 7.692669739  |
| 8687 | -0.352108471 | -0.352108 | -0.352108471 | 7.098078287  | 5.494417177  | 3.890756066  |
| 8692 | 5.927948731  | 7.0176135 | 6.472781091  | 6.641651422  | 7.315470468  | 7.989289514  |
| 8693 | 4.16706778   | 4.9799919 | 3.354143641  | 1.916337486  | 1.731739118  | 2.100935855  |
| 8694 | 6.44815499   | 5.4302295 | 5.939192221  | 5.712263427  | 7.486478001  | 3.938048854  |
| 8701 | -0.352108471 | -0.352108 | -0.352108471 | 6.702366812  | 9.022567127  | 4.382166498  |
| 8702 | 6.766005329  | 6.6445697 | 6.705287512  | 5.669631022  | 4.521216954  | 5.095423988  |
| 8703 | -0.352108471 | -0.352108 | -0.352108471 | 5.847512348  | 5.06899778   | 5.458255064  |
| 8704 | 8.506386372  | 3.6057216 | 6.056053999  | 6.913448327  | 7.449539283  | 6.377357371  |
| 8718 | 7.054214915  | 5.9857307 | 6.519972795  | -0.352108471 | -0.352108471 | -0.352108471 |
| 8720 | 4.558115529  | 6.2986722 | 5.428393874  | 6.197683273  | 8.152885412  | 7.175284342  |
| 8721 | 9.765912892  | 6.5973455 | 8.181629182  | 3.787855241  | 0.91431724   | 2.351086241  |
| 8722 | 5.625160771  | 5.6532998 | 5.597021732  | 6.266367194  | 6.276856601  | 6.255877787  |
| 8724 | 2.939198617  | 3.3162771 | 3.127737875  | 3.833071076  | 4.66005769   | 5.487044303  |
| 8727 | 4.792303669  | 4.8304259 | 4.754181416  | -0.352108471 | -0.352108471 | -0.352108471 |
| 8728 | -0.352108471 | -0.352108 | -0.352108471 | 6.51496239   | 4.448112575  | 8.581812205  |
| 8729 | -0.352108471 | -0.352108 | -0.352108471 | 5.415665079  | 6.303569659  | 5.859617369  |
| 8733 | -0.352108471 | -0.352108 | -0.352108471 | 8.247858438  | 8.261463396  | 8.234253481  |
| 8735 | -0.352108471 | -0.352108 | -0.352108471 | 2.912457358  | 0.848019777  | 1.880238567  |
| 8737 | 5.698981455  | 5.876277  | 6.05357254   | 6.296043865  | 7.70388208   | 4.888205651  |
| 8738 | -0.352108471 | -0.352108 | -0.352108471 | 5.284974356  | 5.315258837  | 5.254689875  |
| 8740 | 9.775390841  | 0.95183   | 5.363610422  | 3.477522833  | 1.807952763  | 5.147092904  |
| 8742 | -0.352108471 | -0.352108 | -0.352108471 | 2.772468849  | 1.90830372   | 1.04413859   |
| 8749 | 5.960830253  | 5.8001998 | 5.639569322  | -0.352108471 | -0.352108471 | -0.352108471 |
| 8751 | 6.433318728  | 6.4453648 | 6.421272681  | 7.240174153  | 7.246938498  | 7.233409808  |
| 8754 | 2.711561556  | 4.0019009 | 1.421222192  | 9.421598849  | 4.758553984  | 7.090076417  |
| 8755 | 5.426639686  | 7.2382937 | 6.332466669  | -0.352108471 | -0.352108471 | -0.352108471 |
| 8761 | 3.127737875  | 3.136327  | 3.119148782  | 7.792233337  | 7.209478834  | 6.626724331  |
| 8763 | 4.878665478  | 1.5899128 | 8.167418132  | 6.963991695  | 6.498829008  | 7.429154382  |
| 8764 | -0.352108471 | -0.352108 | -0.352108471 | 6.003978506  | 6.002308672  | 6.005648339  |
| 8766 | 5.927434695  | 7.7083518 | 6.817893231  | 8.529558902  | 6.564802653  | 7.547180778  |
| 8772 | 5.217491139  | 6.4970264 | 3.937955899  | -0.352108471 | -0.352108471 | -0.352108471 |
| 8775 | 5.261854875  | 7.4912415 | 9.720628135  | 7.76913794   | 5.777211438  | 9.761064442  |
| 8776 | -0.352108471 | -0.352108 | -0.352108471 | 5.636331951  | 6.006489724  | 5.821410838  |
| 8777 | -0.352108471 | -0.352108 | -0.352108471 | 6.700481766  | 6.846999794  | 6.77374078   |
| 8780 | 5.156273414  | 5.2915926 | 5.020954247  | 6.198272066  | 4.667571989  | 5.432922028  |
| 8786 | 2.715495103  | 0.0515452 | 1.383520155  | 0.600256943  | 4.001853132  | 2.301055037  |
| 8793 | -0.352108471 | -0.352108 | -0.352108471 | 6.390945344  | 7.395526103  | 8.400106862  |
| 8794 | -0.352108471 | -0.352108 | -0.352108471 | 5.458255064  | 5.458255064  | 5.458255064  |



|      |              |           |              |              |              |              |
|------|--------------|-----------|--------------|--------------|--------------|--------------|
| 8795 | 5.062989958  | 5.1158344 | 5.089412202  | 3.847846724  | 8.031147602  | 5.939497163  |
| 8797 | 2.15990226   | 4.671913  | -0.352108471 | 1.880238567  | -0.352108471 | 4.112585606  |
| 8798 | -0.352108471 | -0.352108 | -0.352108471 | 5.663737322  | 4.387216247  | 6.940258397  |
| 8801 | -0.352108471 | -0.352108 | -0.352108471 | 7.634480443  | 6.459158017  | 7.04681923   |
| 8802 | 7.511160936  | 4.7920103 | 6.151585628  | -0.352108471 | -0.352108471 | -0.352108471 |
| 8803 | -0.352108471 | -0.352108 | -0.352108471 | 3.744317129  | 8.332589892  | 6.038453511  |
| 8808 | -0.352108471 | -0.352108 | -0.352108471 | 6.488333699  | 5.663737322  | 4.839140945  |
| 8812 | -0.352108471 | -0.352108 | -0.352108471 | 7.175112333  | 5.657612942  | 6.416362638  |
| 8814 | -0.352108471 | -0.352108 | -0.352108471 | 6.496886722  | 6.532588736  | 6.461184708  |
| 8815 | 6.57771666   | 6.8018138 | 7.025910888  | 7.15770761   | 6.74942879   | 7.565986429  |
| 8816 | -0.352108471 | -0.352108 | -0.352108471 | 6.032678842  | 6.079429156  | 6.056053999  |
| 8822 | -0.352108471 | -0.352108 | -0.352108471 | 0.82273449   | -0.352108471 | 1.997577452  |
| 8824 | 4.951513474  | 6.9569047 | 5.954209091  | 9.314173775  | 5.088170497  | 7.201172136  |
| 8826 | 2.681724436  | 5.7155573 | -0.352108471 | 7.837299406  | 8.255966946  | 8.046633176  |
| 8829 | 5.785697221  | 7.2173176 | 8.64893801   | 5.708307224  | 5.55062115   | 5.865993298  |
| 8832 | 6.673763173  | 5.1956968 | 8.151829579  | 6.981858868  | 6.585820725  | 7.37789701   |
| 8833 | -0.352108471 | -0.352108 | -0.352108471 | 7.002061667  | 7.371089232  | 6.633034102  |
| 8834 | 2.839240109  | 3.5151412 | 4.191042363  | 5.436344257  | 7.555463443  | 9.674582629  |
| 8837 | -0.352108471 | -0.352108 | -0.352108471 | 4.178899946  | 4.245214285  | 4.112585606  |
| 8843 | 2.620695344  | 2.4458255 | 2.270955716  | -0.352108471 | -0.352108471 | -0.352108471 |
| 8844 | 7.287907295  | 4.3124923 | 5.800199788  | 0.044132154  | 0.440372779  | -0.352108471 |
| 8846 | -0.352108471 | -0.352108 | -0.352108471 | 5.575983727  | 6.442637652  | 4.709329801  |
| 8847 | 7.630271838  | 8.2013461 | 8.772420315  | 7.17500483   | 7.580671038  | 6.769338621  |
| 8848 | 6.243711799  | 2.2010365 | -1.841638854 | -0.352108471 | -0.352108471 | -0.352108471 |
| 8853 | -0.352108471 | -0.352108 | -0.352108471 | 6.148109327  | 6.41249299   | 6.280301159  |
| 8861 | -0.352108471 | -0.352108 | -0.352108471 | 4.788167673  | 6.89992346   | 9.011679248  |
| 8867 | 3.326244202  | 5.9002924 | 8.474340559  | -0.352108471 | -0.352108471 | -0.352108471 |
| 8870 | 6.6873399    | 5.8695181 | 7.505161726  | 8.937970122  | 8.753127999  | 8.568285876  |
| 8871 | -0.352108471 | -0.352108 | -0.352108471 | 5.169157826  | 7.779483104  | 2.558832547  |
| 8872 | -0.352108471 | -0.352108 | -0.352108471 | 1.90830372   | 1.939746065  | 1.876861374  |
| 8874 | 5.269012491  | 5.8485232 | 5.55876787   | 8.348660622  | 4.445076143  | 6.396868383  |
| 8877 | 7.562590964  | 5.6777465 | 9.447435442  | 5.625342717  | 6.221643648  | 5.923493182  |
| 8878 | -0.352108471 | -0.352108 | -0.352108471 | 1.933563105  | 2.245600013  | 2.557636922  |
| 8879 | 4.583433279  | 5.3357979 | 3.831068664  | 6.177361516  | 1.079890975  | 3.628626245  |
| 8880 | 7.145892954  | 5.6251608 | 4.104428589  | 5.663737322  | 4.931152005  | 6.396322638  |
| 8881 | -0.352108471 | -0.352108 | -0.352108471 | 6.991222272  | 7.003831781  | 6.978612763  |
| 8882 | -0.352108471 | -0.352108 | -0.352108471 | 3.658250427  | 7.08041375   | 5.369332089  |
| 8883 | -0.352108471 | -0.352108 | -0.352108471 | 5.750717835  | 6.296043865  | 6.841369896  |
| 8886 | 5.829284965  | 5.9391922 | 6.049099478  | 4.890297659  | 7.28499125   | 6.087644454  |
| 8887 | 6.831289207  | 6.8453896 | 6.817188811  | 6.636273252  | 6.662724824  | 6.609821679  |
| 8888 | -0.352108471 | -0.352108 | -0.352108471 | 2.952408619  | 8.494562413  | 5.723485516  |
| 8890 | -0.352108471 | -0.352108 | -0.352108471 | 6.321454008  | 6.833512543  | 6.577483275  |
| 8891 | 4.025746598  | 3.0129081 | 3.519327359  | 2.360715852  | 6.959399527  | 4.66005769   |
| 8892 | 5.875870905  | 5.6886226 | 5.501374389  | -0.352108471 | -0.352108471 | -0.352108471 |
| 8894 | 5.625160771  | 5.9078932 | 5.342428385  | 5.985836085  | 6.917329546  | 6.451582815  |
| 8896 | -0.352108471 | -0.352108 | -0.352108471 | 0.763805499  | 3.425082766  | 2.094444132  |
| 8897 | -0.352108471 | -0.352108 | -0.352108471 | 6.857664128  | 5.688622647  | 4.519581166  |

|      |              |           |              |              |              |              |
|------|--------------|-----------|--------------|--------------|--------------|--------------|
| 8899 | -0.352108471 | -0.352108 | -0.352108471 | 6.234483536  | 6.17482898   | 6.204656258  |
| 8904 | -0.352108471 | -0.352108 | -0.352108471 | 5.869665514  | 8.662384619  | 3.076946409  |
| 8905 | -0.352108471 | -0.352108 | -0.352108471 | 2.588601447  | 2.076900813  | 3.100302082  |
| 8907 | 4.942456401  | 5.3546856 | 5.766914897  | 5.821410838  | 8.986480707  | 2.656340969  |
| 8911 | 5.749402114  | 5.4182    | 6.08060427   | -0.352108471 | -0.352108471 | -0.352108471 |
| 8914 | 8.255357175  | 5.2545667 | 6.75496194   | 9.135176459  | 7.072343191  | 5.009509923  |
| 8915 | 1.383520155  | -0.352108 | 3.119148782  | 1.70308327   | 1.305230684  | 2.100935855  |
| 8916 | 3.927296353  | 5.4937832 | 7.060270077  | 9.1382795    | 0.71707893   | 4.927679215  |
| 8924 | 6.121583321  | 6.1079622 | 6.135204448  | 5.363386034  | 4.688318557  | 6.038453511  |
| 8925 | 6.579013184  | 7.687325  | 5.470701366  | 5.681727979  | 5.504333593  | 5.859122364  |
| 8927 | -0.352108471 | -0.352108 | -0.352108471 | 5.821410838  | 8.06625322   | 3.576196354  |
| 8932 | -0.352108471 | -0.352108 | -0.352108471 | 4.037188095  | 3.98310057   | 4.010144333  |
| 8933 | 8.845585048  | 7.6440897 | 6.442594304  | 8.971186951  | 7.843980686  | 10.09839322  |
| 8934 | 4.687728637  | 4.4585636 | 4.229398638  | 6.417610763  | 6.183964016  | 5.950317268  |
| 8939 | 6.383151496  | 6.3831515 | 6.383151496  | 5.89334693   | 6.383151496  | 5.403542364  |
| 8943 | 8.086273015  | 7.387333  | 8.785213013  | 7.703846689  | 6.886610445  | 6.069374202  |
| 8971 | -0.352108471 | -0.352108 | -0.352108471 | 8.65465389   | 6.92012998   | 7.787391935  |
| 8974 | 7.233420289  | 8.2467204 | 6.220120221  | 6.369156591  | 6.666996822  | 6.071316359  |
| 8975 | 4.262826663  | 7.5402844 | 5.901555533  | 4.268782719  | 3.638085437  | 3.953434078  |
| 8985 | 8.958800099  | 8.5952649 | 9.322335323  | 6.386203135  | 9.341977543  | 7.864090339  |
| 8986 | 4.873965948  | 6.9266188 | 5.90029238   | 8.254344786  | 7.201489776  | 6.148634766  |
| 8991 | -0.352108471 | -0.352108 | -0.352108471 | 3.197838286  | 1.704743119  | 2.451290702  |
| 8992 | 9.992085632  | 7.0425231 | 4.092960534  | 7.63243203   | 5.778593187  | 6.705512608  |
| 8993 | -0.352108471 | -0.352108 | -0.352108471 | 2.451290702  | -0.352108471 | 5.254689875  |
| 8994 | 4.552447108  | 2.4458255 | 0.339203952  | 0.598807818  | 1.549724107  | -0.352108471 |
| 8996 | 6.242048279  | 5.1353307 | 7.348765869  | -0.352108471 | -0.352108471 | -0.352108471 |
| 8997 | 5.622946356  | 5.8979271 | 5.347965619  | 7.237481046  | 6.092421421  | 6.664951234  |
| 9013 | -0.352108471 | -0.352108 | -0.352108471 | 8.271767364  | 6.396868383  | 4.521969401  |
| 9015 | -0.352108471 | -0.352108 | -0.352108471 | 4.641114331  | 2.032889041  | 3.337001686  |
| 9016 | -0.352108471 | -0.352108 | -0.352108471 | 4.846380084  | 5.369332089  | 5.892284093  |
| 9019 | 3.127737875  | 1.5359262 | 4.719549595  | 7.918642203  | 7.112539889  | 8.724744518  |
| 9021 | -0.352108471 | -0.352108 | -0.352108471 | 5.723485516  | 7.598136142  | 3.84883489   |
| 9022 | -0.352108471 | -0.352108 | -0.352108471 | 8.199113911  | 6.014930938  | 7.107022425  |
| 9025 | 6.002308672  | 6.0023087 | 6.002308672  | -0.352108471 | -0.352108471 | -0.352108471 |
| 9028 | 5.978385123  | 4.8057376 | 5.392061359  | -0.352108471 | -0.352108471 | -0.352108471 |
| 9031 | 6.539005987  | 5.9750867 | 6.257046343  | 6.285554459  | 5.198592136  | 7.372516781  |
| 9033 | 6.765632416  | 6.2738323 | 5.782032102  | -0.352108471 | -0.352108471 | -0.352108471 |
| 9037 | 4.689404048  | 5.5409946 | 6.392585219  | 4.809512228  | 7.347612652  | 9.885713077  |
| 9040 | 6.831289207  | 8.6852124 | 4.977365966  | 6.53365233   | 8.039081087  | 5.028223574  |
| 9043 | 6.888413829  | 6.9037827 | 6.873045007  | 2.572849659  | 3.337746555  | 1.807952763  |
| 9045 | 9.130093579  | 7.3885414 | 5.64698925   | 8.947027392  | 8.719966382  | 8.492905372  |
| 9049 | 7.087058971  | 5.9174671 | 6.502263028  | 4.08236011   | 4.123886406  | 4.040833815  |
| 9050 | 6.243369603  | 6.4855628 | 6.72775599   | 6.368460376  | 7.32117851   | 5.415742243  |
| 9052 | 4.720401452  | 6.6400194 | 8.559637334  | 8.186564808  | 10.12402513  | 9.155294971  |
| 9060 | -0.352108471 | -0.352108 | -0.352108471 | 7.929846958  | 8.004134703  | 7.855559213  |
| 9061 | -0.352108471 | -0.352108 | -0.352108471 | 5.663737322  | 3.42307981   | 7.904394834  |
| 9063 | 5.695288594  | 6.4105853 | 4.979991919  | 4.706961556  | 5.494417177  | 3.919505936  |

|      |              |           |              |              |              |              |
|------|--------------|-----------|--------------|--------------|--------------|--------------|
| 9064 | 3.675218758  | 7.0463464 | 5.360782592  | -0.352108471 | -0.352108471 | -0.352108471 |
| 9069 | -0.352108471 | -0.352108 | -0.352108471 | 4.178899946  | 3.10562882   | 5.252171071  |
| 9070 | -0.352108471 | -0.352108 | -0.352108471 | 6.553582047  | 6.758502354  | 6.6560422    |
| 9075 | 4.807954409  | 6.1075388 | 7.407123193  | -0.352108471 | -0.352108471 | -0.352108471 |
| 9079 | 6.076474386  | 6.441194  | 6.258834195  | 6.596757815  | 6.617035395  | 6.576480236  |
| 9091 | -0.352108471 | -0.352108 | -0.352108471 | 3.126717648  | 5.923493182  | 8.720268716  |
| 9092 | -0.352108471 | -0.352108 | -0.352108471 | 6.687283697  | 8.518982526  | 4.855584868  |
| 9093 | -0.352108471 | -0.352108 | -0.352108471 | 0.897715333  | -0.352108471 | 2.147539136  |
| 9094 | 3.475977358  | 7.2333939 | 5.354685649  | 5.244410337  | 5.983736712  | 6.723063087  |
| 9096 | 8.200122739  | 5.9391922 | 3.678261704  | 5.2310771    | 4.08236011   | 2.933643121  |
| 9097 | 4.08236011   | 5.6367458 | 2.527974404  | 5.145345772  | 7.140810338  | 9.136274903  |
| 9098 | 5.387827808  | 5.0471545 | 5.217491139  | -0.352108471 | -0.352108471 | -0.352108471 |
| 9100 | 5.688622647  | 4.7300581 | 6.647187152  | 5.264899422  | 4.66005769   | 4.055215957  |
| 9101 | 7.697484075  | 9.3755955 | 6.019372647  | 2.383424055  | 5.596916991  | 8.810409928  |
| 9112 | 5.45216887   | 5.2163076 | 5.334238245  | -0.352108471 | -0.352108471 | -0.352108471 |
| 9113 | -0.352108471 | -0.352108 | -0.352108471 | 4.23169962   | 5.458255064  | 6.684810508  |
| 9114 | -0.352108471 | -0.352108 | -0.352108471 | 9.04158568   | 4.267576158  | 6.654580919  |
| 9117 | 2.817104043  | 6.0908083 | 9.364512638  | 6.728481336  | 6.880482436  | 6.576480236  |
| 9118 | 5.343397067  | 5.5133907 | 5.428393874  | -0.352108471 | -0.352108471 | -0.352108471 |
| 9122 | 4.769678434  | 8.8449948 | 6.807336599  | 5.711631646  | 6.029474081  | 5.393789211  |
| 9123 | 9.977180362  | 9.2603759 | 8.543571489  | 10.82357252  | 9.163293869  | 7.503015218  |
| 9124 | 1.725405383  | 5.3048771 | 3.515141236  | 5.695345386  | 9.033433542  | 7.364389464  |
| 9125 | 4.842259381  | 7.8618483 | 6.352053864  | -0.352108471 | -0.352108471 | -0.352108471 |
| 9126 | -0.352108471 | -0.352108 | -0.352108471 | 1.086108655  | 2.902991023  | 4.71987339   |
| 9128 | 7.797672701  | 5.1371871 | 6.467429889  | 0.044132154  | -0.352108471 | 0.440372779  |
| 9130 | -0.352108471 | -0.352108 | -0.352108471 | 8.675595782  | 4.575594309  | 6.625595045  |
| 9131 | -0.352108471 | -0.352108 | -0.352108471 | 2.549953871  | 4.80208491   | 7.054215949  |
| 9133 | -0.352108471 | -0.352108 | -0.352108471 | 5.635731685  | 5.637296679  | 5.638861673  |
| 9136 | -0.352108471 | -0.352108 | -0.352108471 | 5.38675695   | 5.992023871  | 4.78149003   |
| 9138 | -0.352108471 | -0.352108 | -0.352108471 | 8.757071629  | 6.235921161  | 3.714770693  |
| 9139 | 10.25363947  | 9.1167897 | 7.97993986   | 7.604342909  | 7.604530028  | 7.604717148  |
| 9140 | 4.711580131  | -0.083697 | 2.313941724  | 1.05704313   | 0.808855576  | 1.305230684  |
| 9141 | 7.712003927  | 4.6114766 | 10.81253123  | -0.352108471 | -0.352108471 | -0.352108471 |
| 9144 | -0.352108471 | -0.352108 | -0.352108471 | 6.814965918  | 7.610788767  | 6.019143068  |
| 9145 | 4.560734218  | 1.089466  | 2.8251001    | 6.369156591  | 6.056063086  | 6.682250095  |
| 9146 | 8.862102274  | 7.2266559 | 5.591209613  | 7.624442075  | 6.671114915  | 8.577769235  |
| 9147 | 5.506476153  | 6.3719083 | 5.939192221  | -0.352108471 | -0.352108471 | -0.352108471 |
| 9149 | 6.392379834  | 6.056054  | 5.719728164  | 5.295431597  | 3.808300023  | 6.782563171  |
| 9153 | 7.202880948  | 6.4702818 | 7.935480142  | 7.342842975  | 4.080420317  | 5.711631646  |
| 9158 | -0.352108471 | -0.352108 | -0.352108471 | 6.649850066  | 6.689878453  | 6.609821679  |
| 9159 | 6.369156591  | 8.6463338 | 4.091979363  | 4.80208491   | 6.436646051  | 3.167523769  |
| 9166 | -0.352108471 | -0.352108 | -0.352108471 | 4.927679215  | 3.722982255  | 6.132376175  |
| 9167 | -0.352108471 | -0.352108 | -0.352108471 | 5.169157826  | 3.625762757  | 6.712552894  |
| 9168 | 10.40955719  | 11.440461 | 9.378653109  | 8.963247175  | 10.71595765  | 12.46866813  |
| 9169 | 6.920641908  | 5.0508701 | 8.790413753  | 7.902162009  | 8.021293639  | 7.961727824  |
| 9170 | -0.352108471 | -0.352108 | -0.352108471 | 5.958359385  | 5.958359385  | 5.958359385  |
| 9175 | 7.997043888  | 6.4151598 | 7.206101829  | 6.689783396  | 6.078960196  | 7.300606596  |

|      |              |           |              |              |              |              |
|------|--------------|-----------|--------------|--------------|--------------|--------------|
| 9177 | 5.91063331   | 7.559113  | 4.262153572  | -0.352108471 | -0.352108471 | -0.352108471 |
| 9180 | 9.636006898  | 7.1533661 | 8.394686482  | 8.358023042  | 5.473576744  | 6.915799893  |
| 9181 | 7.405829366  | 4.8637719 | 6.134800615  | 8.566745243  | 6.12990004   | 3.693054838  |
| 9184 | 6.332466669  | 6.3439771 | 6.320956231  | -0.352108471 | -0.352108471 | -0.352108471 |
| 9188 | 5.90029238   | 5.9200251 | 5.880559702  | 7.179921364  | 7.082394844  | 7.277447884  |
| 9189 | 8.356138191  | 5.2893636 | 6.822750891  | 0.872801732  | 0.440372779  | 1.305230684  |
| 9194 | 9.15729976   | 7.9172789 | 8.537289355  | 7.087030751  | 7.109037535  | 7.065023967  |
| 9196 | -0.352108471 | -0.352108 | -0.352108471 | 5.998406448  | 4.823218894  | 7.173594001  |
| 9200 | 6.615214539  | 6.0908083 | 5.566402142  | 7.21432556   | 8.396513207  | 7.805419383  |
| 9203 | 10.0427294   | 2.6847959 | 6.363762655  | 5.726388281  | 7.273319574  | 4.179456987  |
| 9208 | 4.383761877  | 6.4607607 | 5.422261279  | 7.573761745  | 6.359270363  | 5.144778982  |
| 9209 | 9.169748699  | 4.5210305 | 6.845389604  | 3.10018379   | 8.093650192  | 5.596916991  |
| 9212 | 6.242048279  | 9.5347842 | 2.949312392  | -0.352108471 | -0.352108471 | -0.352108471 |
| 9213 | 6.871438113  | 7.3225599 | 7.096999017  | 6.23431917   | 5.339005699  | 5.786662435  |
| 9215 | 5.409592279  | 6.3909925 | 5.90029238   | -0.352108471 | -0.352108471 | -0.352108471 |
| 9217 | 7.281910873  | 3.4318806 | 5.356895761  | 6.345275458  | 6.661089146  | 6.02946177   |
| 9218 | 3.023687642  | 3.1277379 | 3.231788108  | 3.139138355  | 4.066434892  | 2.211841818  |
| 9219 | 6.383151496  | 7.937798  | 4.828504948  | 6.206854907  | 7.272704841  | 8.338554776  |
| 9220 | -0.352108471 | -0.352108 | -0.352108471 | 3.83155557   | 3.67501408   | 3.753284825  |
| 9221 | -0.352108471 | -0.352108 | -0.352108471 | 6.900899666  | 7.869001359  | 5.932797972  |
| 9230 | -0.352108471 | -0.352108 | -0.352108471 | 8.171089969  | 6.121648419  | 7.146369194  |
| 9231 | 6.131855599  | 6.4938011 | 5.769910098  | 6.177455484  | 6.588254064  | 6.999052643  |
| 9232 | -0.352108471 | -0.352108 | -0.352108471 | 7.41450965   | 7.21467292   | 7.014836189  |
| 9236 | 7.894349489  | 5.6799187 | 6.787134073  | 0.598807818  | 1.549724107  | -0.352108471 |
| 9238 | -0.352108471 | -0.352108 | -0.352108471 | 4.927679215  | 4.954218546  | 4.901139884  |
| 9240 | -0.352108471 | -0.352108 | -0.352108471 | 0.919601171  | -0.352108471 | 2.191310813  |
| 9246 | -0.352108471 | -0.352108 | -0.352108471 | 6.866733042  | 3.710755367  | 10.02271072  |
| 9252 | -0.352108471 | -0.352108 | -0.352108471 | 5.412561087  | 5.881427309  | 4.943694865  |
| 9253 | 6.352053864  | 7.7558284 | 4.948279361  | 6.702212637  | 6.204656258  | 5.707099879  |
| 9256 | -0.352108471 | -0.352108 | -0.352108471 | 6.12990004   | 6.585243937  | 5.674556144  |
| 9258 | 7.377755134  | 7.3860827 | 7.369427614  | -0.352108471 | -0.352108471 | -0.352108471 |
| 9260 | 9.154512565  | 3.329584  | 6.242048279  | 8.892159505  | 8.053243237  | 8.472701371  |
| 9261 | 7.843715778  | 7.3777551 | 6.911794489  | 7.554701412  | 8.971348772  | 8.263025092  |
| 9262 | 7.488513026  | 7.2380437 | 7.363278387  | 6.139145127  | 6.74407332   | 7.349001514  |
| 9263 | -0.352108471 | -0.352108 | -0.352108471 | 5.961762068  | 5.714657037  | 6.208867099  |
| 9265 | -0.352108471 | -0.352108 | -0.352108471 | 6.235921161  | 7.981251269  | 4.490591053  |
| 9266 | 5.453390045  | 4.7738799 | 6.132900169  | -0.352108471 | -0.352108471 | -0.352108471 |
| 9270 | 6.111060532  | 7.2999875 | 8.488914385  | 5.524645228  | 5.824288785  | 6.123932342  |
| 9274 | -0.352108471 | -0.352108 | -0.352108471 | 6.97523337   | 6.116668207  | 6.545950789  |
| 9275 | -0.352108471 | -0.352108 | -0.352108471 | 6.087644454  | 6.101634422  | 6.073654487  |
| 9276 | -0.352108471 | -0.352108 | -0.352108471 | 7.093272886  | 5.998628691  | 6.545950789  |
| 9283 | 5.555243693  | 6.0488902 | 5.802066932  | 1.678838435  | 0.003114953  | 3.354561918  |
| 9290 | -0.352108471 | -0.352108 | -0.352108471 | 2.221964512  | 4.876419248  | -0.432490224 |
| 9294 | 2.931165817  | 5.344627  | 7.758088225  | 2.281847319  | 1.876861374  | 2.686833264  |
| 9295 | -0.352108471 | -0.352108 | -0.352108471 | 5.400334673  | 6.43341099   | 4.367258356  |
| 9296 | 9.036711488  | 8.1054943 | 7.174277117  | 7.996847425  | 7.261477988  | 6.52610855   |
| 9312 | -0.352108471 | -0.352108 | -0.352108471 | 5.821410838  | 5.838255388  | 5.804566288  |

|      |              |           |              |              |              |              |
|------|--------------|-----------|--------------|--------------|--------------|--------------|
| 9317 | 5.428393874  | 5.4582551 | 5.398532684  | -0.352108471 | -0.352108471 | -0.352108471 |
| 9318 | -0.352108471 | -0.352108 | -0.352108471 | 6.184922964  | 5.008911019  | 5.596916991  |
| 9319 | 1.424520744  | 2.2526182 | 3.080715679  | -0.352108471 | -0.352108471 | -0.352108471 |
| 9320 | -0.352108471 | -0.352108 | -0.352108471 | 6.74407332   | 9.723136524  | 3.765010117  |
| 9321 | -0.352108471 | -0.352108 | -0.352108471 | 6.664782857  | 6.946414218  | 6.383151496  |
| 9322 | 8.689382124  | 5.9391922 | 3.189002319  | 2.947260382  | 6.246629235  | -0.352108471 |
| 9324 | -0.352108471 | -0.352108 | -0.352108471 | 4.328943044  | 4.927679215  | 5.526415385  |
| 9325 | -0.352108471 | -0.352108 | -0.352108471 | 5.745080913  | 6.204656258  | 6.664231603  |
| 9329 | -0.352108471 | -0.352108 | -0.352108471 | 5.773635462  | 5.657479225  | 5.715557343  |
| 9333 | 3.826365093  | 5.4539948 | 7.081624593  | -0.352108471 | -0.352108471 | -0.352108471 |
| 9341 | -0.352108471 | -0.352108 | -0.352108471 | 1.72638491   | 1.305230684  | 2.147539136  |
| 9342 | 6.817987879  | 7.1464808 | 6.489495002  | 8.338361295  | 8.3259471    | 8.35077549   |
| 9343 | 6.271724951  | 7.2219907 | 5.321459249  | 1.593612684  | 4.80208491   | 8.010557136  |
| 9344 | 6.722855594  | 6.7737408 | 6.824625966  | 4.80208491   | 3.238780563  | 6.365389257  |
| 9349 | 8.875726438  | 7.476284  | 8.176005205  | 10.27298918  | 9.314194364  | 9.793591774  |
| 9351 | 6.771333876  | 7.101491  | 7.431648213  | 5.538465142  | 7.331075404  | 9.123685666  |
| 9352 | 6.332466669  | 7.3377359 | 5.327197429  | 4.424292154  | 5.169157826  | 5.914023497  |
| 9356 | 6.068484609  | 5.5587679 | 5.049051131  | -0.352108471 | -0.352108471 | -0.352108471 |
| 9358 | -0.352108471 | -0.352108 | -0.352108471 | 3.355050029  | 2.168105043  | 0.981160057  |
| 9361 | -0.352108471 | -0.352108 | -0.352108471 | 4.199045311  | 4.843308497  | 3.554782125  |
| 9362 | -0.352108471 | -0.352108 | -0.352108471 | 4.66005769   | 4.688318557  | 4.631796822  |
| 9366 | 7.300045303  | 3.0044489 | 5.152247113  | -0.352108471 | -0.352108471 | -0.352108471 |
| 9368 | 6.313045251  | 7.0975298 | 6.705287512  | 9.582346695  | 6.603550508  | 3.624754321  |
| 9369 | 7.403589581  | 9.6185918 | 8.511090683  | 6.640981799  | 9.478595064  | 3.803368534  |
| 9370 | 5.932497881  | 6.1414231 | 5.723572646  | 0.476561106  | -0.352108471 | 1.305230684  |
| 9372 | 7.599457653  | 6.991795  | 6.384132442  | -0.352108471 | -0.352108471 | -0.352108471 |
| 9373 | 6.273832259  | 8.4330061 | 4.114658406  | -0.352108471 | -0.352108471 | -0.352108471 |
| 9375 | -0.352108471 | -0.352108 | -0.352108471 | 7.982438     | 6.808614206  | 7.395526103  |
| 9377 | -0.352108471 | -0.352108 | -0.352108471 | 5.558051538  | 5.412561087  | 5.267070637  |
| 9379 | 7.051951014  | 5.6759598 | 8.427942253  | 6.092834897  | 6.220238598  | 6.3476423    |
| 9380 | 8.018017164  | 7.5830279 | 7.148038734  | 4.15029505   | 6.676169033  | 9.202043016  |
| 9382 | -0.352108471 | -0.352108 | -0.352108471 | 7.054600764  | 7.065023967  | 7.044177561  |
| 9383 | 10.48662507  | 10.645369 | 10.32788103  | 9.357766202  | 9.222529006  | 9.493003397  |
| 9390 | -0.352108471 | -0.352108 | -0.352108471 | 1.601336827  | -0.352108471 | 3.554782125  |
| 9391 | 7.74464347   | 8.5666969 | 9.388750386  | 7.898117032  | 6.216853774  | 7.057485403  |
| 9392 | -0.352108471 | -0.352108 | -0.352108471 | 6.50840962   | 2.85499773   | -0.798414159 |
| 9394 | -0.352108471 | -0.352108 | -0.352108471 | 6.705287512  | 8.093451114  | 5.31712391   |
| 9397 | 6.07919154   | 5.7752316 | 6.383151496  | 6.381623983  | 6.448016836  | 6.31523113   |
| 9399 | -0.352108471 | -0.352108 | -0.352108471 | 5.980334028  | 5.049755821  | 6.910912236  |
| 9401 | -0.352108471 | -0.352108 | -0.352108471 | 5.46506016   | 5.311680183  | 5.388370172  |
| 9403 | 7.308059056  | 2.3601448 | 4.834101937  | 0.440372779  | 0.440372779  | 0.440372779  |
| 9406 | 7.630589424  | 7.6417956 | 7.619383264  | 6.796814879  | 6.813225323  | 6.780404436  |
| 9411 | 1.392109249  | 3.136327  | -0.352108471 | 3.919505936  | 3.919505936  | 3.919505936  |
| 9412 | -0.352108471 | -0.352108 | -0.352108471 | 6.186654084  | 5.140820559  | 5.663737322  |
| 9414 | -0.352108471 | -0.352108 | -0.352108471 | 6.333716952  | 5.926083128  | 6.12990004   |
| 9415 | 5.083528108  | 5.7494021 | 6.41527612   | 6.251034844  | 8.135069204  | 4.367000484  |
| 9416 | -0.352108471 | -0.352108 | -0.352108471 | 7.380770874  | 6.963991695  | 6.547212516  |

|      |              |           |              |              |              |              |
|------|--------------|-----------|--------------|--------------|--------------|--------------|
| 9419 | 6.657925647  | 6.3786425 | 6.099359439  | 2.982525938  | 10.02316438  | 6.502845157  |
| 9424 | 5.764900762  | 5.2094052 | 5.487153005  | 3.984771689  | 3.337746555  | 4.631796822  |
| 9435 | -0.352108471 | -0.352108 | -0.352108471 | 7.146302205  | 7.168934463  | 7.123669946  |
| 9439 | 5.688622647  | 3.8506582 | 7.526587051  | -0.352108471 | -0.352108471 | -0.352108471 |
| 9442 | 6.537383725  | 6.5498529 | 6.524914536  | -0.352108471 | -0.352108471 | -0.352108471 |
| 9443 | -0.352108471 | -0.352108 | -0.352108471 | 1.783698732  | -0.352108471 | 3.919505936  |
| 9444 | 6.369156591  | 7.3159658 | 5.422347382  | 5.88700099   | 5.117928775  | 6.656073205  |
| 9445 | 8.418474585  | 7.7071024 | 6.99573031   | 8.482991049  | 8.727022238  | 8.971053427  |
| 9446 | 7.737443439  | 8.1222505 | 7.929846958  | 3.485942693  | 8.918347684  | 6.202145189  |
| 9447 | -0.352108471 | -0.352108 | -0.352108471 | 4.947028615  | 3.410771276  | 4.178899946  |
| 9448 | 5.94941124   | 5.1750751 | 6.723747374  | 3.288054249  | 11.55578322  | 7.421918736  |
| 9453 | 8.048540869  | 10.235425 | 5.861657216  | 8.056272062  | 7.200316908  | 6.344361754  |
| 9454 | 5.189865576  | 6.8018138 | 8.413761971  | 6.505960865  | 7.208566448  | 5.803355282  |
| 9455 | -0.352108471 | -0.352108 | -0.352108471 | 7.855055752  | 2.612079095  | 5.233567424  |
| 9456 | -0.352108471 | -0.352108 | -0.352108471 | 5.084660056  | 5.253655595  | 5.169157826  |
| 9464 | -0.352108471 | -0.352108 | -0.352108471 | 6.705287512  | 6.720696571  | 6.689878453  |
| 9468 | 1.544498927  | 7.2599694 | 4.402234161  | 5.657882681  | 5.03806008   | 4.418237479  |
| 9469 | 6.642362719  | 7.9979469 | 9.353531152  | 2.19005738   | 2.232575625  | 2.147539136  |
| 9470 | 6.711285967  | 6.9134889 | 7.11569183   | -0.063442489 | 8.22816271   | 4.08236011   |
| 9472 | 7.10070861   | 6.6741289 | 6.247549147  | 6.245851737  | 6.345275458  | 6.444699178  |
| 9474 | -0.352108471 | -0.352108 | -0.352108471 | 1.946552907  | 4.245214285  | -0.352108471 |
| 9475 | 0.993969088  | 2.0080661 | 1.501017585  | 7.610507833  | 5.338134843  | 3.065761853  |
| 9480 | 8.119613748  | 3.3791905 | 5.749402114  | -0.352108471 | -0.352108471 | -0.352108471 |
| 9491 | 6.817644959  | 6.3288135 | 6.573229206  | 7.477384778  | 6.426248865  | 5.375112952  |
| 9493 | -0.352108471 | -0.352108 | -0.352108471 | 3.755650079  | 5.596916991  | 7.438183904  |
| 9495 | 9.004870837  | 8.6332332 | 8.261595649  | 7.410570876  | 7.42628567   | 7.394856081  |
| 9497 | 4.389753559  | 4.6155835 | 4.841413467  | 5.444257186  | 5.022877661  | 5.233567424  |
| 9500 | 7.54354356   | 7.5821735 | 7.504913637  | 8.000331568  | 8.090401543  | 7.910261593  |
| 9506 | 5.820919659  | 5.3951129 | 5.608016291  | -0.352108471 | -0.352108471 | -0.352108471 |
| 9507 | -0.352108471 | -0.352108 | -0.352108471 | 5.912731223  | 6.419009989  | 6.165870606  |
| 9510 | 6.369156591  | 6.3831515 | 6.355161685  | 8.74194097   | 8.75496699   | 8.72891495   |
| 9512 | -0.352108471 | -0.352108 | -0.352108471 | 5.992709867  | 5.923493182  | 5.854276497  |
| 9513 | 7.172893309  | 7.8265955 | 8.4802976    | 1.90830372   | -0.799919187 | 4.616526626  |
| 9516 | -0.352108471 | -0.352108 | -0.352108471 | 5.080688208  | 5.859617369  | 6.638546529  |
| 9517 | 8.724757641  | 7.474345  | 6.223932405  | 1.455237762  | 3.101770383  | 2.278504072  |
| 9518 | -0.352108471 | -0.352108 | -0.352108471 | 10.61797309  | 8.095105263  | 5.572237436  |
| 9520 | 6.737716966  | 4.5126046 | 5.625160771  | 5.458255064  | 5.458255064  | 5.458255064  |
| 9522 | 6.180907385  | 6.3819313 | 5.979883448  | 6.97270287   | 7.234869818  | 6.710535922  |
| 9524 | 7.277765718  | 5.911264  | 8.644267448  | 5.325716078  | 7.812756484  | 2.838675672  |
| 9526 | -0.352108471 | -0.352108 | -0.352108471 | 6.186562848  | 4.607226501  | 7.765899196  |
| 9527 | 10.25638879  | 11.071318 | 9.441459346  | 8.838285123  | 9.285047788  | 9.061666455  |
| 9528 | 5.420115948  | 7.4174962 | 9.414876412  | 7.144314609  | 8.144186245  | 6.144442972  |
| 9529 | 1.880238567  | 1.0973564 | 2.66312072   | 2.759099813  | 10.14062402  | 6.449861915  |
| 9531 | 7.17777694   | 7.1881098 | 7.167444067  | 7.107022425  | 7.123669946  | 7.090374904  |
| 9532 | -0.352108471 | -0.352108 | -0.352108471 | 7.105752362  | 7.065023967  | 7.146480757  |
| 9533 | -0.352108471 | -0.352108 | -0.352108471 | 2.686833264  | 1.983727385  | 3.389939142  |
| 9537 | 4.789140709  | 6.3828735 | 7.976606244  | 6.981888777  | 7.003831781  | 6.959945773  |



|      |              |           |              |              |              |              |
|------|--------------|-----------|--------------|--------------|--------------|--------------|
| 9538 | 7.08718283   | 6.9950186 | 7.179347036  | 5.688622647  | 5.715557343  | 5.661687951  |
| 9540 | -0.352108471 | -0.352108 | -0.352108471 | 4.456886199  | 4.482692559  | 4.43107984   |
| 9545 | 5.52809333   | 8.721468  | 7.124780656  | 6.340207437  | 5.001397432  | 5.670802435  |
| 9550 | -0.352108471 | -0.352108 | -0.352108471 | 5.412561087  | 6.09360634   | 4.731515835  |
| 9551 | -0.352108471 | -0.352108 | -0.352108471 | 8.474371858  | 10.57934051  | 6.369403202  |
| 9552 | -0.352108471 | -0.352108 | -0.352108471 | 6.930501922  | 6.457843773  | 6.694172847  |
| 9553 | -0.352108471 | -0.352108 | -0.352108471 | 8.020778366  | 5.87902495   | 6.949901658  |
| 9556 | -0.352108471 | -0.352108 | -0.352108471 | 4.73755266   | 4.843308497  | 4.631796822  |
| 9557 | -0.352108471 | -0.352108 | -0.352108471 | 5.31996161   | 6.087644454  | 6.855327299  |
| 9559 | 6.555842248  | 5.6886226 | 4.821403046  | 8.357031501  | 7.429168474  | 6.501305448  |
| 9562 | 8.938395791  | 4.6954143 | 6.816905042  | -0.352108471 | -0.352108471 | -0.352108471 |
| 9563 | 6.466502204  | 6.5498529 | 6.383151496  | 7.852779831  | 7.85000045   | 7.855559213  |
| 9564 | 2.401210306  | 5.6251608 | 8.849111237  | 6.091028778  | 8.18491552   | 10.27880226  |
| 9567 | -0.352108471 | -0.352108 | -0.352108471 | 6.573076731  | 4.620757251  | 5.596916991  |
| 9570 | 6.705287512  | 5.2353542 | 8.175220834  | 0.808855576  | 0.808855576  | 0.808855576  |
| 9572 | 4.178899946  | 4.2452143 | 4.112585606  | 7.318914431  | 7.327812407  | 7.310016454  |
| 9575 | 3.77676452   | 3.1277379 | 2.47871123   | 9.430678828  | 7.15770761   | 4.884736392  |
| 9578 | 5.089412202  | 3.9390226 | 6.239801767  | 8.569616524  | 6.65027966   | 4.730942797  |
| 9580 | -0.352108471 | -0.352108 | -0.352108471 | 5.91224268   | 5.284974356  | 4.657706032  |
| 9581 | -0.352108471 | -0.352108 | -0.352108471 | 3.692383899  | 3.033522536  | 2.374661173  |
| 9583 | 8.716980513  | 7.7652098 | 8.241095163  | 7.442803779  | 8.544556018  | 7.993679898  |
| 9584 | 4.232695765  | 6.502263  | 8.771830291  | -0.352108471 | -0.352108471 | -0.352108471 |
| 9587 | -0.352108471 | -0.352108 | -0.352108471 | 6.220814195  | 6.104429468  | 5.988044741  |
| 9588 | 7.668336029  | 6.7761196 | 7.222227808  | 8.631044277  | 8.150207663  | 7.669371048  |
| 9590 | 3.328967273  | 4.8455481 | 4.087257665  | 4.413952725  | 3.67886621   | 5.14903924   |
| 9592 | 7.07688723   | 6.3808154 | 7.772959069  | 6.278776074  | 8.1244467    | 9.970117326  |
| 9600 | 5.980334028  | 6.0023087 | 5.958359385  | 3.585121301  | 3.615460478  | 3.554782125  |
| 9601 | 7.063413806  | 7.065024  | 7.061803645  | 7.579247893  | 7.603251574  | 7.555244212  |
| 9604 | 9.463768812  | 7.9132346 | 6.362700427  | 8.329369232  | 6.097445169  | 3.865521105  |
| 9605 | -0.352108471 | -0.352108 | -0.352108471 | 5.325716078  | 5.336173319  | 5.315258837  |
| 9610 | 4.414822703  | 5.3190968 | 6.223370817  | 8.069522068  | 7.054600764  | 6.03967946   |
| 9612 | 2.793929048  | 4.8473688 | 6.90080847   | 6.57344213   | 8.721268123  | 7.647355126  |
| 9616 | 10.93888962  | 5.2806171 | 8.109753335  | 4.977108406  | 8.777586176  | 6.877347291  |
| 9618 | -0.352108471 | -0.352108 | -0.352108471 | 4.295034463  | 4.66005769   | 5.025080916  |
| 9620 | 6.481523945  | 6.6782049 | 6.284842948  | -0.352108471 | -0.352108471 | -0.352108471 |
| 9622 | 3.19376143   | 2.9208697 | 2.647978061  | -0.352108471 | -0.352108471 | -0.352108471 |
| 9627 | 3.066661021  | 2.4868796 | 1.907098161  | 0.153943664  | 1.167362396  | 2.180781129  |
| 9632 | 5.625044719  | 6.9226198 | 6.273832259  | 8.829338302  | 8.299358363  | 7.769378425  |
| 9636 | 6.827262762  | 6.3324667 | 5.837670575  | 10.5366179   | 4.771902901  | 7.654260401  |
| 9638 | 6.471250053  | 5.0516324 | 7.890867686  | 5.98032724   | 7.083520572  | 8.186713904  |
| 9639 | -0.352108471 | -0.352108 | -0.352108471 | 0.897715333  | -0.352108471 | 2.147539136  |
| 9643 | 7.932742872  | 7.960348  | 7.905137775  | 8.535406575  | 8.484269499  | 8.58654365   |
| 9644 | 7.788231263  | 7.1121207 | 6.436010227  | 7.50587715   | 7.294652308  | 7.717101992  |
| 9645 | 5.368273037  | 5.7208707 | 6.073468341  | 0.228373553  | -0.352108471 | 0.808855576  |
| 9646 | -0.352108471 | -0.352108 | -0.352108471 | 5.83972872   | 6.272379278  | 6.056053999  |
| 9655 | -0.352108471 | -0.352108 | -0.352108471 | 4.80208491   | 4.275547921  | 5.328621899  |
| 9657 | 4.110671996  | 2.7402102 | 1.369748469  | -0.352108471 | -0.352108471 | -0.352108471 |

|      |              |           |              |              |              |              |
|------|--------------|-----------|--------------|--------------|--------------|--------------|
| 9658 | -0.352108471 | -0.352108 | -0.352108471 | 7.136603639  | 7.149537332  | 7.123669946  |
| 9662 | 5.540813171  | 3.7939869 | 7.287639464  | 3.194909326  | 4.449748927  | 5.704588529  |
| 9663 | -0.352108471 | -0.352108 | -0.352108471 | 3.401768868  | 8.445217496  | 5.923493182  |
| 9665 | 6.242048279  | 6.6422305 | 5.841866108  | -0.352108471 | -0.352108471 | -0.352108471 |
| 9666 | -0.352108471 | -0.352108 | -0.352108471 | 3.919505936  | 3.919505936  | 3.919505936  |
| 9668 | 4.984151706  | 5.054281  | 4.914022459  | 6.410192983  | 6.662724824  | 6.157661143  |
| 9669 | 4.130459819  | 5.2769993 | 6.423538749  | -0.352108471 | -0.352108471 | -0.352108471 |
| 9670 | -0.352108471 | -0.352108 | -0.352108471 | 7.19609887   | 7.204087928  | 7.188109812  |
| 9672 | 8.112154609  | 6.1705984 | 10.05371084  | 0.52324203   | 1.835337653  | 1.179289842  |
| 9673 | 2.027788313  | 2.6743842 | 2.351086241  | 0.440372779  | 0.440372779  | 0.440372779  |
| 9675 | 8.5356281    | 3.1702468 | 5.852937462  | 5.012919573  | 5.177928403  | 5.095423988  |
| 9679 | -0.352108471 | -0.352108 | -0.352108471 | 4.178899946  | 4.245214285  | 4.112585606  |
| 9683 | 6.712090045  | 6.1215288 | 5.530967493  | -0.352108471 | -0.352108471 | -0.352108471 |
| 9684 | -0.352108471 | -0.352108 | -0.352108471 | 4.456886199  | 3.888434292  | 5.025338107  |
| 9685 | 6.27065599   | 6.6895379 | 7.108419885  | 6.31523113   | 6.31523113   | 6.31523113   |
| 9686 | 7.404181317  | 7.7309094 | 7.567545379  | -0.352108471 | -0.352108471 | -0.352108471 |
| 9688 | 10.24853226  | 2.5452045 | 6.396868383  | 5.723485516  | 7.026054082  | 4.42091695   |
| 9689 | 5.724727855  | 6.7357797 | 7.746831517  | 8.629646632  | 5.908600301  | 7.269123466  |
| 9690 | -0.352108471 | -0.352108 | -0.352108471 | 5.135818178  | 7.026456989  | 3.245179367  |
| 9692 | -0.352108471 | -0.352108 | -0.352108471 | 4.911611019  | 5.775068216  | 6.638525413  |
| 9693 | 4.724875807  | 5.3546856 | 5.984495491  | 0.044132154  | -0.352108471 | 0.440372779  |
| 9694 | -0.352108471 | -0.352108 | -0.352108471 | 7.181002342  | 6.235921161  | 5.29083998   |
| 9696 | 8.394773729  | 3.3111012 | 5.852937462  | 5.504575986  | 6.518700948  | 4.490451024  |
| 9697 | 5.866067462  | 7.879498  | 6.872782744  | 8.564870535  | 6.654943747  | 7.609907141  |
| 9701 | -0.352108471 | -0.352108 | -0.352108471 | 7.887852394  | 5.845499835  | 3.803147276  |
| 9703 | 4.828601104  | 1.4268746 | 3.127737875  | 6.741172219  | 7.547428012  | 7.144300116  |
| 9706 | 6.55915606   | 4.7333542 | 5.64625513   | 6.570974966  | 5.769160278  | 7.372789653  |
| 9709 | -0.352108471 | -0.352108 | -0.352108471 | 6.822208827  | 4.034179148  | 9.610238505  |
| 9710 | 9.355798846  | 7.2521642 | 5.148529572  | 6.534224101  | 9.033982726  | 4.034465476  |
| 9711 | 6.182962498  | 6.2431999 | 6.303437262  | 5.812073039  | 5.435233852  | 6.188912226  |
| 9712 | 4.615583513  | 2.9042317 | 6.326935301  | 5.799246042  | 6.719109903  | 6.259177972  |
| 9716 | 5.55876787   | 5.2003646 | 5.917171177  | -0.352108471 | -0.352108471 | -0.352108471 |
| 9717 | 1.66985715   | -0.352108 | 3.69182277   | 7.08965874   | 7.135139919  | 7.044177561  |
| 9723 | 7.756380467  | 6.5893927 | 5.422404893  | 5.159434386  | 6.59060933   | 3.728259442  |
| 9724 | 5.3562704    | 3.9702163 | 6.742324514  | 4.438588347  | 6.57553158   | 8.712474813  |
| 9726 | -0.352108471 | -0.352108 | -0.352108471 | 6.796389661  | 9.347491699  | 4.245287623  |
| 9727 | -0.352108471 | -0.352108 | -0.352108471 | 6.006937552  | 5.593462023  | 5.800199788  |
| 9728 | -0.352108471 | -0.352108 | -0.352108471 | 8.661917215  | 6.345275458  | 4.0286337    |
| 9731 | 7.293324715  | 4.6835916 | 9.903057782  | 6.370122071  | 4.240891086  | 8.499353055  |
| 9737 | -0.352108471 | -0.352108 | -0.352108471 | 6.123107878  | 5.575983727  | 5.028859576  |
| 9738 | 1.383520155  | -0.352108 | 3.119148782  | 3.010650274  | 3.625414178  | 2.39588637   |
| 9741 | 3.127737875  | 2.5927492 | 3.66272653   | 8.02535373   | 7.487057963  | 8.563649497  |
| 9745 | -0.352108471 | -0.352108 | -0.352108471 | 5.095423988  | 2.753180577  | 7.437667399  |
| 9746 | -0.352108471 | -0.352108 | -0.352108471 | 5.845499835  | 7.080906062  | 4.610093608  |
| 9747 | 0.733613288  | 3.4140749 | 6.094536452  | 6.613428082  | 6.981888777  | 7.350349472  |
| 9748 | 4.533157933  | 5.2849744 | 6.036790779  | -0.352108471 | -0.352108471 | -0.352108471 |
| 9749 | 4.878170137  | 4.5930152 | 5.163325066  | 6.059147646  | 7.55091747   | 6.805032558  |

|      |              |           |              |              |              |              |
|------|--------------|-----------|--------------|--------------|--------------|--------------|
| 9752 | 7.385384826  | 6.7886295 | 7.982140193  | 3.16641146   | 2.863729349  | 2.561047239  |
| 9753 | 8.33805394   | 8.015548  | 8.660559886  | 7.372342935  | 6.337969164  | 6.855156049  |
| 9755 | 6.649492217  | 4.0598791 | 5.354685649  | -0.352108471 | -0.352108471 | -0.352108471 |
| 9757 | 5.148763052  | 6.4158165 | 3.88170964   | -0.352108471 | -0.352108471 | -0.352108471 |
| 9758 | 4.413850426  | 7.1348902 | 5.774370319  | 5.88702069   | 5.959965674  | 5.923493182  |
| 9762 | 7.638570419  | 7.6577576 | 7.619383264  | 5.83433693   | 5.893442277  | 5.775231583  |
| 9764 | 5.753083307  | 6.7046211 | 7.656158799  | 2.368970958  | 2.051108653  | 2.686833264  |
| 9768 | 4.834101937  | 4.9140225 | 4.754181416  | 4.900032819  | 3.919505936  | 5.880559702  |
| 9770 | 5.093645234  | 4.6929891 | 4.292333004  | -0.092986493 | 2.530936724  | 1.218975116  |
| 9772 | -0.352108471 | -0.352108 | -0.352108471 | 4.66005769   | 3.667273284  | 5.652842096  |
| 9774 | -0.352108471 | -0.352108 | -0.352108471 | 2.252618212  | 2.252618212  | 2.252618212  |
| 9775 | -0.352108471 | -0.352108 | -0.352108471 | 8.445308345  | 5.859617369  | 3.273926393  |
| 9779 | -0.352108471 | -0.352108 | -0.352108471 | 6.266367194  | 6.592530242  | 5.940204146  |
| 9780 | 4.152721357  | 4.3859368 | 3.919505936  | 7.505464822  | 7.584456235  | 7.426473409  |
| 9781 | 4.482692559  | 4.4826926 | 4.482692559  | 5.175003254  | 4.688318557  | 5.661687951  |
| 9782 | 3.390089763  | 3.6401927 | 3.515141236  | 9.304340925  | 3.027400287  | 6.165870606  |
| 9783 | 3.527916452  | 2.0382907 | 5.017542253  | 4.623653674  | 5.859617369  | 7.095581064  |
| 9784 | 4.895789266  | 7.7691441 | 6.332466669  | -0.352108471 | -0.352108471 | -0.352108471 |
| 9785 | 7.733937187  | 5.3101159 | 2.886294529  | 5.649070118  | 5.102227346  | 6.19591289   |
| 9786 | -0.352108471 | -0.352108 | -0.352108471 | 5.810973776  | 6.379908636  | 5.242038916  |
| 9787 | -0.352108471 | -0.352108 | -0.352108471 | 5.775068216  | 5.804293869  | 5.745842563  |
| 9789 | -0.352108471 | -0.352108 | -0.352108471 | 5.095423988  | 2.683050179  | 7.507797797  |
| 9790 | 6.413064592  | 6.1999612 | 6.626167961  | 6.541009048  | 6.566987041  | 6.515031054  |
| 9791 | 4.486893444  | 3.9195059 | 5.054280952  | -0.352108471 | -0.352108471 | -0.352108471 |
| 9792 | -0.352108471 | -0.352108 | -0.352108471 | 7.9089289    | 5.562630472  | 6.735779686  |
| 9793 | 2.451290702  | -0.352108 | 5.254689875  | 6.897103579  | 7.230265357  | 6.563941801  |
| 9794 | -0.352108471 | -0.352108 | -0.352108471 | 6.975832766  | 5.355908446  | 6.165870606  |
| 9797 | 4.898228221  | 5.0426837 | 4.753772693  | 4.967105233  | 5.231089211  | 4.703121254  |
| 9798 | 3.515141236  | 3.1260028 | 3.904279715  | 5.169157826  | 6.107147168  | 4.231168483  |
| 9801 | -0.352108471 | -0.352108 | -0.352108471 | 6.866733042  | 7.435655104  | 6.297810979  |
| 9802 | 9.135297638  | 7.4571353 | 8.296216488  | 6.851354764  | 8.585704367  | 7.718529565  |
| 9804 | 6.585334598  | 7.3981936 | 8.211052636  | 6.74407332   | 9.263824746  | 4.224321894  |
| 9805 | -0.352108471 | -0.352108 | -0.352108471 | 3.851914096  | 7.752449596  | 11.6529851   |
| 9807 | -0.352108471 | -0.352108 | -0.352108471 | 5.807807786  | 5.859617369  | 5.911426952  |
| 9808 | 4.764812292  | 4.8368672 | 4.908922128  | 2.227397414  | 3.153970607  | 4.080543799  |
| 9810 | 8.938163999  | 5.1886636 | 7.063413806  | 11.83876934  | 6.345275458  | 0.851781579  |
| 9811 | 1.548305613  | 3.1538669 | 2.351086241  | 5.125066048  | 6.128945019  | 5.627005534  |
| 9812 | -0.352108471 | -0.352108 | -0.352108471 | 6.51496239   | 8.952871833  | 4.077052948  |
| 9813 | 6.573968999  | 6.8095777 | 6.338360336  | 5.24541358   | 7.163898936  | 6.204656258  |
| 9814 | 6.079428658  | 7.2688291 | 6.674128879  | -0.352108471 | -0.352108471 | -0.352108471 |
| 9817 | 8.020596416  | 6.4636749 | 4.906753414  | -0.352108471 | -0.352108471 | -0.352108471 |
| 9818 | 4.837838105  | 8.4420851 | 6.63996159   | 7.040039925  | 5.114287606  | 8.965792245  |
| 9823 | -0.352108471 | -0.352108 | -0.352108471 | 4.178899946  | 8.811336071  | -0.45353618  |
| 9827 | -0.352108471 | -0.352108 | -0.352108471 | 5.060292738  | 8.493027093  | 1.627558384  |
| 9828 | 2.515697587  | 2.8638858 | 2.167509344  | 4.61952944   | 7.852312882  | 6.235921161  |
| 9829 | -0.352108471 | -0.352108 | -0.352108471 | 4.612603102  | 4.245214285  | 4.979991919  |
| 9830 | 5.593041911  | 5.122927  | 5.357984451  | 1.835742592  | 1.731739118  | 1.939746065  |

|      |              |           |              |              |              |              |
|------|--------------|-----------|--------------|--------------|--------------|--------------|
| 9832 | 5.780178948  | 6.1025262 | 6.424873398  | 3.723847293  | 2.686833264  | 4.760861323  |
| 9833 | 5.165045602  | 5.037556  | 5.292535209  | 5.955899749  | 6.129328352  | 5.782471146  |
| 9834 | -0.352108471 | -0.352108 | -0.352108471 | 1.595004939  | 1.968661759  | 2.342318579  |
| 9840 | -0.352108471 | -0.352108 | -0.352108471 | 0.873566864  | 4.30363603   | 2.588601447  |
| 9841 | 4.071613908  | 9.7647453 | 6.918179605  | 0.176450022  | 2.960269185  | 5.744088347  |
| 9842 | 6.519673958  | 6.5498529 | 6.489495002  | 4.748044625  | 5.383503645  | 4.112585606  |
| 9851 | 6.888413829  | 7.1190237 | 6.65780394   | 3.315115848  | 4.482692559  | 2.147539136  |
| 9853 | 6.121528769  | 6.2500203 | 5.993037234  | 8.822321597  | 6.903642175  | 4.984962753  |
| 9854 | -0.352108471 | -0.352108 | -0.352108471 | 8.487701923  | 3.844039289  | 6.165870606  |
| 9857 | 7.324847766  | 6.5282698 | 6.926558783  | 3.557676152  | 5.511864271  | 7.466052391  |
| 9858 | -0.352108471 | -0.352108 | -0.352108471 | 7.4835379    | 6.74407332   | 6.00460874   |
| 9860 | 4.195330899  | 6.7922355 | 5.493783215  | -0.352108471 | -0.352108471 | -0.352108471 |
| 9861 | 5.493783215  | 7.8333776 | 3.154188805  | 7.218748868  | 9.849095998  | 4.588401739  |
| 9862 | 6.846957097  | 7.7732847 | 5.920629473  | 6.196807598  | 6.038453511  | 6.355161685  |
| 9866 | 5.998561302  | 6.485029  | 6.971496699  | 1.075361022  | 5.564673104  | 10.05398519  |
| 9869 | -0.352108471 | -0.352108 | -0.352108471 | 5.086979029  | 2.464102471  | 3.77554075   |
| 9870 | 6.77374078   | 6.8769143 | 6.670567271  | 2.645094132  | 1.946552907  | 1.248011682  |
| 9875 | 4.546288763  | 3.4534819 | 5.639095647  | 9.535832513  | 4.821247242  | 7.178539877  |
| 9877 | -0.352108471 | -0.352108 | -0.352108471 | 5.596802035  | 5.095423988  | 4.594045941  |
| 9878 | 6.692425927  | 6.2558778 | 7.128974067  | 7.36946426   | 7.123669946  | 7.615258575  |
| 9879 | 6.672131844  | 6.5556422 | 6.61388704   | 6.129906531  | 5.623999158  | 5.876952844  |
| 9881 | 4.508443336  | 1.9818275 | 7.03505914   | -0.352108471 | -0.352108471 | -0.352108471 |
| 9885 | 7.485638078  | 7.1484312 | 6.811224416  | 10.18264246  | 4.579096867  | 7.380869666  |
| 9886 | -0.352108471 | -0.352108 | -0.352108471 | 8.566461653  | 3.013063799  | 5.789762726  |
| 9887 | -0.352108471 | -0.352108 | -0.352108471 | 0.793818797  | 1.939746065  | -0.352108471 |
| 9889 | -0.352108471 | -0.352108 | -0.352108471 | 6.647129021  | 6.345275458  | 6.043421895  |
| 9890 | 4.595554449  | 6.2738323 | 7.952110069  | -0.352108471 | -0.352108471 | -0.352108471 |
| 9891 | 6.678493225  | 6.4815239 | 6.284554665  | 5.835851878  | 6.573460638  | 6.204656258  |
| 9895 | 4.11446209   | 5.6886226 | 7.262783204  | 4.66005769   | 6.46289976   | 2.857215619  |
| 9898 | 6.885065247  | 7.3585026 | 6.411627881  | 9.168274926  | 4.65870287   | 6.913488898  |
| 9899 | 5.58470995   | 6.417871  | 7.251032027  | 6.013441144  | 5.605609608  | 6.421272681  |
| 9901 | 5.70788994   | 8.3468616 | 7.027375773  | 2.686833264  | 2.686833264  | 2.686833264  |
| 9902 | 7.679998338  | 6.8884138 | 6.09682932   | 8.43469238   | 8.794269606  | 8.614480993  |
| 9903 | 2.425295226  | 3.1277379 | 3.830180525  | 5.201281981  | 4.456886199  | 3.712490418  |
| 9904 | -0.352108471 | -0.352108 | -0.352108471 | 6.749542057  | 4.697428975  | 5.723485516  |
| 9905 | -0.352108471 | -0.352108 | -0.352108471 | 2.099323895  | 2.147539136  | 2.051108653  |
| 9906 | 6.137964501  | 6.8049593 | 5.470969743  | 1.76984594   | 1.807952763  | 1.731739118  |
| 9907 | 7.61557436   | 9.9698569 | 8.792715612  | 6.016006936  | 3.216492509  | 8.815521363  |
| 9908 | 7.379848571  | 7.7862073 | 7.583027949  | -0.352108471 | -0.352108471 | -0.352108471 |
| 9909 | -0.352108471 | -0.352108 | -0.352108471 | 3.836853754  | 8.207248096  | 6.022050925  |
| 9910 | 7.241294412  | 6.5132981 | 5.785301759  | 0.532534912  | 3.014766647  | 1.77365078   |
| 9913 | 6.261203695  | 4.8620061 | 7.660401276  | 2.715821749  | 1.876861374  | 3.554782125  |
| 9915 | -0.352108471 | -0.352108 | -0.352108471 | 5.859617369  | 5.873345987  | 5.845888751  |
| 9917 | 9.752203857  | 7.8536471 | 5.955090413  | 7.144469731  | 5.184582679  | 6.164526205  |
| 9918 | 3.071062971  | -0.069028 | 1.501017585  | 6.443488165  | 6.620834921  | 6.532161543  |
| 9921 | 5.338939682  | 7.1577076 | 8.976475538  | 6.384545421  | 8.139840961  | 7.262193191  |
| 9922 | 6.643961298  | 4.7989575 | 2.953953666  | -0.352108471 | -0.352108471 | -0.352108471 |

|       |              |           |              |              |              |              |
|-------|--------------|-----------|--------------|--------------|--------------|--------------|
| 9923  | 4.025396405  | 6.0023087 | 7.979220939  | -0.352108471 | -0.352108471 | -0.352108471 |
| 9926  | 6.186677781  | 6.137515  | 6.088352295  | 6.491713684  | 6.168550609  | 5.845387534  |
| 9927  | 6.056053999  | 4.0475121 | 8.064595901  | -0.352108471 | -0.352108471 | -0.352108471 |
| 9928  | 8.130079352  | 4.3267266 | 6.228402992  | 6.203468718  | 3.718345889  | 4.960907304  |
| 9929  | 6.005139519  | 6.4793592 | 6.95357888   | 1.873849414  | 3.327395831  | 0.420302997  |
| 9931  | 10.02371757  | 2.9199094 | 6.471813476  | 7.005535728  | 7.674102345  | 8.342668962  |
| 9933  | 6.147000016  | 6.0023087 | 6.291691359  | -0.352108471 | -0.352108471 | -0.352108471 |
| 9939  | 6.939027266  | 6.503264  | 6.721145652  | 6.943288527  | 5.321415098  | 8.565161956  |
| 9942  | 5.829395824  | 5.4058873 | 6.252904388  | 7.264208882  | 4.082756168  | 5.673482525  |
| 9943  | -0.352108471 | -0.352108 | -0.352108471 | 4.990395041  | 5.704335255  | 6.418275469  |
| 9945  | 6.570599508  | 7.512373  | 5.628825995  | 6.022050925  | 8.637376742  | 3.406725108  |
| 9948  | 7.573741943  | 5.0321403 | 10.1153436   | 10.89380691  | 6.864581573  | 8.879194243  |
| 9953  | 7.096300341  | 6.5905083 | 6.084716267  | -0.352108471 | -0.352108471 | -0.352108471 |
| 9955  | -0.352108471 | -0.352108 | -0.352108471 | 5.494417177  | 5.07269015   | 5.916144203  |
| 9961  | 6.624675593  | 6.6898785 | 6.559472732  | 5.363386034  | 4.688318557  | 6.038453511  |
| 9962  | -0.352108471 | -0.352108 | -0.352108471 | 1.90830372   | 0.44132138   | 3.375286059  |
| 9966  | 7.196698817  | 6.3508918 | 8.042505803  | 11.09000445  | 6.857611197  | 2.625217947  |
| 9967  | -0.352108471 | -0.352108 | -0.352108471 | 7.579958746  | 7.79736455   | 8.014770353  |
| 9968  | 2.255229707  | 2.4139212 | 2.572612597  | 0.940233577  | 2.232575625  | -0.352108471 |
| 9972  | -0.352108471 | -0.352108 | -0.352108471 | 5.426834386  | 6.458486305  | 5.942660345  |
| 9973  | -0.352108471 | -0.352108 | -0.352108471 | 5.060292738  | 5.054280952  | 5.066304524  |
| 9978  | 8.400021833  | 5.2644402 | 6.832231007  | 7.070792134  | 6.294852751  | 6.682822443  |
| 9980  | 7.533181164  | 5.5225958 | 3.512010431  | 2.579735877  | 3.506739767  | 4.433743658  |
| 9984  | -0.352108471 | -0.352108 | -0.352108471 | 4.66005769   | 3.448587005  | 5.871528375  |
| 9985  | 6.77374078   | 6.4865129 | 7.060968613  | -0.352108471 | -0.352108471 | -0.352108471 |
| 9987  | -0.352108471 | -0.352108 | -0.352108471 | 4.178899946  | 4.245214285  | 4.112585606  |
| 9989  | 8.841775715  | 5.5739006 | 7.207838162  | 6.415928975  | 6.429470164  | 6.402387785  |
| 9990  | 5.179066351  | 7.0906116 | 6.134838983  | 7.136909616  | 7.073709405  | 7.010509195  |
| 9991  | -0.352108471 | -0.352108 | -0.352108471 | 5.034844435  | 4.285270944  | 4.66005769   |
| 9993  | -0.352108471 | -0.352108 | -0.352108471 | 6.962622793  | 6.991300859  | 6.933944727  |
| 9997  | 5.458255064  | 6.8370443 | 4.079465821  | 2.397492216  | -0.523698052 | 5.318682485  |
| 10000 | 5.625160771  | 5.6532998 | 5.597021732  | -0.352108471 | -0.352108471 | -0.352108471 |
| 10005 | 5.217491139  | 4.9094248 | 5.52555751   | -0.352108471 | -0.352108471 | -0.352108471 |
| 10006 | -0.352108471 | -0.352108 | -0.352108471 | 6.345275458  | 5.524551845  | 7.16599907   |
| 10007 | 8.553294822  | 6.9486088 | 7.750951825  | 8.633222429  | 6.99756632   | 5.361910212  |
| 10008 | 4.93827241   | 8.3216045 | 6.62993844   | 1.429982115  | 2.051108653  | 0.808855576  |
| 10011 | -0.352108471 | -0.352108 | -0.352108471 | 6.967882254  | 6.845389604  | 7.090374904  |
| 10013 | 8.127936319  | 6.4815239 | 4.835111571  | -0.352108471 | -0.352108471 | -0.352108471 |
| 10014 | -0.352108471 | -0.352108 | -0.352108471 | 6.577483275  | 9.18789191   | 3.967074641  |
| 10015 | -0.352108471 | -0.352108 | -0.352108471 | 6.332214754  | 7.971859628  | 7.152037191  |
| 10018 | 5.895444161  | 5.9583594 | 5.832528937  | -0.352108471 | -0.352108471 | -0.352108471 |
| 10019 | 3.156118404  | 5.4750327 | 4.315575532  | 7.923945324  | 8.123876858  | 8.023911091  |
| 10020 | 8.173230291  | 10.39646  | 5.950000211  | 6.773559605  | 7.877865971  | 8.982172337  |
| 10021 | 5.089412202  | 7.6803769 | 2.498447515  | -0.352108471 | -0.352108471 | -0.352108471 |
| 10023 | -0.352108471 | -0.352108 | -0.352108471 | 4.80208491   | 2.214800769  | 7.389369052  |
| 10024 | -0.352108471 | -0.352108 | -0.352108471 | 6.79328955   | 6.12990004   | 5.466510531  |
| 10025 | 5.55876787   | 3.7776098 | 7.339925922  | -0.352108471 | -0.352108471 | -0.352108471 |

|       |              |           |              |              |              |              |
|-------|--------------|-----------|--------------|--------------|--------------|--------------|
| 10036 | 5.984058041  | 7.020468  | 6.502263028  | -0.352108471 | -0.352108471 | -0.352108471 |
| 10040 | -0.352108471 | -0.352108 | -0.352108471 | 6.296043865  | 8.566522921  | 4.02556481   |
| 10042 | -0.352108471 | -0.352108 | -0.352108471 | 3.137777564  | 2.169424975  | 1.201072386  |
| 10043 | 3.922803383  | 7.533337  | 11.14387056  | -0.352108471 | -0.352108471 | -0.352108471 |
| 10048 | 6.513393601  | 4.8786655 | 3.243937355  | -0.352108471 | -0.352108471 | -0.352108471 |
| 10049 | -0.352108471 | -0.352108 | -0.352108471 | 2.430006404  | 1.305230684  | 3.554782125  |
| 10051 | -0.352108471 | -0.352108 | -0.352108471 | 7.407593833  | 7.305589088  | 7.509598577  |
| 10052 | 8.022485543  | 5.7390796 | 6.880782588  | 6.131560745  | 5.049536003  | 7.213585487  |
| 10054 | 2.114525649  | 0.6525147 | 1.383520155  | 5.945179855  | 6.514592953  | 7.084006052  |
| 10055 | 2.868619878  | 5.7743703 | 8.680120759  | 9.70237992   | 6.396868383  | 3.091356845  |
| 10056 | -0.352108471 | -0.352108 | -0.352108471 | 6.231462073  | 6.617035395  | 5.845888751  |
| 10057 | 2.313941724  | -0.352108 | 4.979991919  | -0.352108471 | -0.352108471 | -0.352108471 |
| 10058 | -0.352108471 | -0.352108 | -0.352108471 | 3.984771689  | 8.827077036  | -0.857533659 |
| 10059 | 5.2437856    | 3.2117008 | 7.275870366  | 7.827149815  | 5.486185202  | 6.656667509  |
| 10060 | -0.352108471 | -0.352108 | -0.352108471 | 5.851984659  | 5.958359385  | 6.06473411   |
| 10061 | 3.383962077  | 1.7932408 | 2.588601447  | 2.245600013  | 4.843308497  | -0.352108471 |
| 10066 | -0.352108471 | -0.352108 | -0.352108471 | 3.873485727  | 7.726913848  | 5.800199788  |
| 10067 | -0.352108471 | -0.352108 | -0.352108471 | 7.392065217  | 9.495289152  | 5.288841283  |
| 10069 | 8.688360779  | 3.8961666 | 6.292263673  | 5.081587239  | 6.624675593  | 8.167763946  |
| 10071 | 7.26030319   | 0.5284212 | 3.894362219  | 7.866196667  | 6.04935442   | 4.232512173  |
| 10072 | -0.352108471 | -0.352108 | -0.352108471 | 2.30059104   | 5.095423988  | 7.890256936  |
| 10073 | -0.352108471 | -0.352108 | -0.352108471 | 7.036396027  | 5.043693827  | 9.029098227  |
| 10075 | 6.235835821  | 7.1747392 | 6.705287512  | 7.948372706  | 7.882354958  | 7.81633721   |
| 10076 | -0.352108471 | -0.352108 | -0.352108471 | 5.090955144  | 6.327498594  | 7.564042044  |
| 10078 | -0.352108471 | -0.352108 | -0.352108471 | 2.566521557  | 2.686833264  | 2.80714497   |
| 10079 | 5.354685649  | 8.1605816 | 2.548789675  | 0.440372779  | 0.440372779  | 0.440372779  |
| 10081 | 5.423418052  | 8.0978691 | 6.760643551  | 5.094944745  | 7.161529275  | 6.12823701   |
| 10082 | 5.55876787   | 6.6884024 | 4.42913331   | -0.352108471 | -0.352108471 | -0.352108471 |
| 10084 | 7.052946286  | 7.5438013 | 6.562091319  | 7.591099557  | 5.059520804  | 6.32531018   |
| 10090 | 6.043995933  | 5.9200251 | 6.167966808  | -0.352108471 | -0.352108471 | -0.352108471 |
| 10092 | 8.672195035  | 7.2078382 | 5.743481288  | 5.57263748   | 8.502960473  | 7.037798976  |
| 10093 | 8.488257143  | 8.3208704 | 8.404563757  | 6.995453563  | 6.860600843  | 6.725748122  |
| 10094 | 7.305341479  | 6.3675477 | 8.243135268  | 7.942419631  | 7.951790231  | 7.933049032  |
| 10095 | 6.722720212  | 8.7405151 | 7.731617636  | 8.018799431  | 9.551011601  | 6.486587261  |
| 10096 | 3.032100559  | 5.3546856 | 7.677270739  | 8.965057682  | 9.032201693  | 9.099345705  |
| 10097 | 7.567545379  | 5.9598492 | 9.175241591  | 8.324693977  | 8.606752498  | 8.465723238  |
| 10098 | -0.352108471 | -0.352108 | -0.352108471 | 8.422196636  | 8.73496788   | 8.109425393  |
| 10099 | 8.655991794  | 6.8884506 | 5.120909473  | -0.352108471 | -0.352108471 | -0.352108471 |
| 10101 | -0.352108471 | -0.352108 | -0.352108471 | 4.400452081  | 4.688318557  | 4.112585606  |
| 10102 | -0.352108471 | -0.352108 | -0.352108471 | 6.369156591  | 8.487113729  | 4.251199453  |
| 10105 | 5.217491139  | 5.2437595 | 5.191222747  | 7.732958287  | 7.753815204  | 7.712101371  |
| 10106 | 7.891291013  | 9.4635895 | 6.318992537  | 8.824627107  | 4.044662409  | 6.434644758  |
| 10107 | 8.4041377    | 3.5565304 | 5.980334028  | -0.352108471 | -0.352108471 | -0.352108471 |
| 10109 | 7.406780685  | 6.585366  | 6.996073349  | 7.940525332  | 8.720997106  | 7.160053558  |
| 10111 | 6.241589745  | 6.7541237 | 5.98644149   | -0.352108471 | -0.352108471 | -0.352108471 |
| 10114 | 5.012806723  | 2.7642256 | 0.515644509  | -0.352108471 | -0.352108471 | -0.352108471 |
| 10116 | 6.831289207  | 3.5717279 | 10.09085056  | -0.352108471 | -0.352108471 | -0.352108471 |



|       |              |           |              |              |              |              |
|-------|--------------|-----------|--------------|--------------|--------------|--------------|
| 10120 | -0.352108471 | -0.352108 | -0.352108471 | 5.28443913   | 6.202841915  | 4.366036344  |
| 10121 | 6.502263028  | 6.5150311 | 6.489495002  | 5.559971507  | 5.458255064  | 5.661687951  |
| 10123 | -0.352108471 | -0.352108 | -0.352108471 | 5.887891897  | 5.859617369  | 5.831342841  |
| 10124 | -0.352108471 | -0.352108 | -0.352108471 | 3.845517346  | 9.148846702  | 6.497182024  |
| 10127 | -0.352108471 | -0.352108 | -0.352108471 | 2.954768492  | 8.49220254   | 5.723485516  |
| 10128 | 5.464467563  | 5.7854448 | 5.624956163  | 7.018738825  | 6.553547577  | 6.786143201  |
| 10129 | 7.614894272  | 5.6651445 | 6.640019393  | -0.352108471 | -0.352108471 | -0.352108471 |
| 10130 | 8.040517613  | 5.0420037 | 11.03903153  | 7.443032621  | 8.557990908  | 6.328074335  |
| 10131 | 7.867075524  | 4.375982  | 6.121528769  | 6.14092838   | 8.117699187  | 7.129313784  |
| 10133 | 1.558607889  | 3.1435646 | 2.351086241  | 6.785344739  | 7.948859342  | 9.112373945  |
| 10134 | 6.801813774  | 6.8152071 | 6.788420481  | 5.785312543  | 6.215464554  | 5.355160532  |
| 10135 | 7.224081961  | 7.6288222 | 6.819341757  | 4.927679215  | 7.256744609  | 2.59861382   |
| 10139 | 4.878665478  | 5.424892  | 4.332438977  | 5.200785865  | 5.954772223  | 4.446799506  |
| 10140 | 6.304262672  | 5.0729826 | 5.688622647  | -0.352108471 | -0.352108471 | -0.352108471 |
| 10142 | 3.519327359  | 3.9195059 | 3.119148782  | 7.112080183  | 7.123669946  | 7.100490419  |
| 10146 | -0.352108471 | -0.352108 | -0.352108471 | 7.254534766  | 7.396922722  | 7.112146811  |
| 10147 | 8.960446948  | 7.3341756 | 8.147311281  | 5.766605513  | 5.752100495  | 5.781110532  |
| 10151 | 6.888413829  | 7.923074  | 5.853753645  | 6.74407332   | 5.769826746  | 7.718319895  |
| 10152 | 6.676634183  | 6.9981067 | 6.355161685  | 7.90849764   | 7.910261593  | 7.906733687  |
| 10153 | 4.579618372  | 4.8071978 | 4.352038969  | -0.352108471 | -0.352108471 | -0.352108471 |
| 10155 | 9.331311477  | 8.7226292 | 9.026970344  | 8.363856385  | 7.866438362  | 8.861274409  |
| 10156 | 1.383520155  | -0.352108 | 3.119148782  | 5.624956163  | 2.894005165  | 8.355907161  |
| 10157 | 7.785115583  | 7.561036  | 7.673075797  | 6.143653628  | 8.109480151  | 7.12656689   |
| 10159 | -0.352108471 | -0.352108 | -0.352108471 | 6.739237433  | 9.082855302  | 7.911046368  |
| 10162 | 3.894362219  | 3.6761388 | 4.112585606  | 1.769397609  | 2.100935855  | 1.437859363  |
| 10163 | -0.352108471 | -0.352108 | -0.352108471 | 4.297639083  | 4.482692559  | 4.112585606  |
| 10164 | -0.352108471 | -0.352108 | -0.352108471 | 6.020406059  | 5.903760504  | 5.787114949  |
| 10166 | 8.064097622  | 8.5040074 | 8.943917233  | 8.234930555  | 7.507418023  | 6.77990549   |
| 10168 | 2.28805764   | 1.3835202 | 0.478982671  | 6.999151529  | 4.447819503  | 5.723485516  |
| 10169 | 7.865765445  | 8.1117158 | 8.357666133  | 9.97838355   | 4.145515629  | 7.061949589  |
| 10174 | 7.144015656  | 7.7619438 | 6.526087512  | 2.365241789  | 7.678941672  | 7.337437481  |
| 10175 | 5.800199788  | 6.9257977 | 4.674601876  | 5.339767796  | 5.663737322  | 5.987706848  |
| 10179 | 6.607366144  | 6.8884289 | 6.326303357  | 5.260498334  | 7.556595622  | 9.85269291   |
| 10181 | -0.352108471 | -0.352108 | -0.352108471 | 5.622951531  | 3.123053341  | 4.373002436  |
| 10184 | 5.616637089  | 6.6691367 | 7.721636304  | -0.352108471 | -0.352108471 | -0.352108471 |
| 10186 | -0.352108471 | -0.352108 | -0.352108471 | 8.327422832  | 6.359270363  | 4.391117895  |
| 10188 | 6.502263028  | 8.897189  | 4.107337069  | -0.352108471 | -0.352108471 | -0.352108471 |
| 10189 | 7.625720986  | 5.7225368 | 6.674128879  | 8.997925677  | 4.481831973  | 6.739878825  |
| 10190 | -0.352108471 | -0.352108 | -0.352108471 | 6.258904145  | 6.832997432  | 6.545950789  |
| 10193 | 8.26146588   | 8.3248995 | 8.388333102  | 9.418447763  | 7.969136911  | 6.519826059  |
| 10195 | 3.637317492  | 4.4790014 | 4.058159444  | -0.352108471 | -0.352108471 | -0.352108471 |
| 10197 | 6.275670199  | 9.5069118 | 7.891291013  | 4.876036081  | 11.04492239  | 7.960479236  |
| 10199 | 5.749402114  | 5.7752316 | 5.723572646  | -0.352108471 | -0.352108471 | -0.352108471 |
| 10201 | 5.336797593  | 7.8458821 | 6.59133985   | 8.519718399  | 4.404136098  | 6.461927248  |
| 10204 | 6.633391004  | 4.3217914 | 5.477591179  | 8.404582737  | 6.852471422  | 7.628527079  |
| 10206 | 7.01689787   | 2.2123474 | 4.614622638  | 3.724386732  | 5.980653558  | 8.236920384  |
| 10209 | 8.764190522  | 9.5528476 | 7.975533452  | 8.651507263  | 10.18202757  | 9.416767417  |

|       |              |           |              |              |              |              |
|-------|--------------|-----------|--------------|--------------|--------------|--------------|
| 10210 | -0.352108471 | -0.352108 | -0.352108471 | 5.363214028  | 6.12990004   | 6.896586052  |
| 10211 | 4.178899946  | 4.4723897 | 3.885410195  | 8.057914127  | 10.49998128  | 5.615846978  |
| 10213 | 4.821139212  | 5.6886226 | 6.556106082  | 3.919505936  | 4.775844621  | 3.06316725   |
| 10216 | 6.346779205  | 5.2536204 | 5.800199788  | -0.352108471 | -0.352108471 | -0.352108471 |
| 10217 | -0.352108471 | -0.352108 | -0.352108471 | 5.637296679  | 3.321105474  | 7.953487884  |
| 10220 | 6.801813774  | 7.6893311 | 5.914296484  | -0.352108471 | -0.352108471 | -0.352108471 |
| 10226 | 7.160491391  | 7.4885725 | 7.816653562  | 8.657468488  | 8.022372859  | 7.38727723   |
| 10227 | 7.586479633  | 6.4869152 | 5.387350737  | 0.044132154  | -0.352108471 | 0.440372779  |
| 10228 | 1.392109249  | 3.136327  | -0.352108471 | 6.235921161  | 5.925950508  | 6.545891814  |
| 10229 | 5.798839501  | 6.3324667 | 6.866093836  | -0.352108471 | -0.352108471 | -0.352108471 |
| 10233 | -0.352108471 | -0.352108 | -0.352108471 | 4.877659669  | 5.128763636  | 5.379867603  |
| 10236 | -0.352108471 | -0.352108 | -0.352108471 | 1.77976078   | 0.498717195  | 3.060804366  |
| 10237 | -0.352108471 | -0.352108 | -0.352108471 | 7.478462511  | 7.49196897   | 7.464956052  |
| 10238 | -0.352108471 | -0.352108 | -0.352108471 | 6.463674915  | 7.831839331  | 5.095510498  |
| 10239 | 5.699084559  | 2.7312357 | 4.215160124  | 1.845238787  | 2.952060305  | 0.73841727   |
| 10241 | 4.613886128  | 2.9817586 | 3.797822384  | 4.114512125  | 3.120807694  | 2.127103263  |
| 10244 | 1.383520155  | 1.1441093 | 1.622931049  | 5.533333932  | 6.33538923   | 7.137444528  |
| 10245 | -0.352108471 | -0.352108 | -0.352108471 | 2.643871277  | 7.546976699  | 5.095423988  |
| 10248 | 5.916797067  | 9.6328437 | 7.774820401  | -0.352108471 | -0.352108471 | -0.352108471 |
| 10250 | 6.212536209  | 6.2312245 | 6.193847962  | 7.013360586  | 7.028614492  | 6.998106681  |
| 10252 | 6.840745137  | 6.2125362 | 5.584327281  | -0.352108471 | -0.352108471 | -0.352108471 |
| 10254 | 5.217491139  | 5.2437595 | 5.191222747  | 5.388370172  | 5.421579811  | 5.355160532  |
| 10257 | 5.708446629  | 4.3675309 | 7.049362332  | -0.352108471 | -0.352108471 | -0.352108471 |
| 10262 | -0.352108471 | -0.352108 | -0.352108471 | 5.004265437  | 6.204656258  | 7.405047079  |
| 10263 | 7.646354586  | 5.1522471 | 2.65813964   | -0.352108471 | -0.352108471 | -0.352108471 |
| 10267 | -0.352108471 | -0.352108 | -0.352108471 | 3.76552139   | 3.902599966  | 3.628442815  |
| 10269 | -0.352108471 | -0.352108 | -0.352108471 | 5.284974356  | 5.315258837  | 5.254689875  |
| 10272 | 3.805664353  | 3.2570297 | 4.354298975  | 10.04490521  | 5.64354012   | 1.242175028  |
| 10273 | 10.38320977  | 7.3432278 | 4.303245861  | 1.968661759  | 4.324587311  | -0.387263794 |
| 10277 | 5.42997807   | 5.1399706 | 5.284974356  | 5.815741428  | 6.204656258  | 6.593571088  |
| 10280 | 6.585218739  | 7.909603  | 9.2339873    | 9.124781927  | 7.47270066   | 5.820619393  |
| 10282 | -0.352108471 | -0.352108 | -0.352108471 | 4.926946533  | 7.791594193  | 6.359270363  |
| 10283 | -0.352108471 | -0.352108 | -0.352108471 | 4.995200701  | 5.170966476  | 4.819434926  |
| 10284 | 7.334332312  | 5.7790475 | 6.556689902  | 3.916292728  | 7.374725876  | 10.83315902  |
| 10285 | 4.490133717  | 5.2849744 | 6.079814995  | 1.493791735  | 1.549724107  | 1.437859363  |
| 10287 | -0.352108471 | -0.352108 | -0.352108471 | 4.927679215  | 4.954218546  | 4.901139884  |
| 10290 | -0.352108471 | -0.352108 | -0.352108471 | 5.904777429  | 6.186562848  | 6.468348268  |
| 10291 | -0.352108471 | -0.352108 | -0.352108471 | 6.406162335  | 7.381783128  | 6.893972732  |
| 10294 | 5.55876787   | 5.5882244 | 5.529311366  | 5.789762726  | 5.804293869  | 5.775231583  |
| 10295 | -0.352108471 | -0.352108 | -0.352108471 | 8.338289949  | 6.369156591  | 4.400023232  |
| 10296 | -0.352108471 | -0.352108 | -0.352108471 | 7.730908829  | 6.64213435   | 5.55335987   |
| 10298 | 7.055211028  | 6.056054  | 5.05689697   | 8.097498543  | 5.080301693  | 6.588900118  |
| 10299 | 2.970907025  | 9.1050561 | 6.03798158   | 6.431242245  | 6.479332994  | 6.383151496  |
| 10300 | -0.352108471 | -0.352108 | -0.352108471 | 8.445718401  | 5.800199788  | 3.154681174  |
| 10301 | 4.067170576  | 4.5639805 | 4.315575532  | 1.954444309  | 2.100935855  | 1.807952763  |
| 10307 | 5.840966015  | 5.9583594 | 5.723572646  | -0.352108471 | -0.352108471 | -0.352108471 |
| 10312 | 6.537383725  | 6.5498529 | 6.524914536  | -0.352108471 | -0.352108471 | -0.352108471 |

|       |              |           |              |              |              |              |
|-------|--------------|-----------|--------------|--------------|--------------|--------------|
| 10313 | 6.640019393  | 6.6538708 | 6.626167961  | 6.87035267   | 6.617035395  | 7.123669946  |
| 10314 | -0.352108471 | -0.352108 | -0.352108471 | 4.54723853   | 7.628050379  | 6.087644454  |
| 10318 | 6.991795048  | 6.0948019 | 7.88878824   | 3.939384717  | 8.320415364  | 6.12990004   |
| 10320 | -0.352108471 | -0.352108 | -0.352108471 | 1.82202867   | 1.646479888  | 1.997577452  |
| 10321 | -0.352108471 | -0.352108 | -0.352108471 | 2.605817304  | -0.352108471 | 5.563743079  |
| 10327 | 6.913488898  | 6.9268019 | 6.900175883  | -0.352108471 | -0.352108471 | -0.352108471 |
| 10328 | -0.352108471 | -0.352108 | -0.352108471 | 7.167444067  | 7.168934463  | 7.165953671  |
| 10330 | -0.352108471 | -0.352108 | -0.352108471 | 7.022760502  | 6.96585859   | 7.079662414  |
| 10335 | 8.508408768  | 8.087084  | 8.929733556  | 8.200258537  | 7.181258248  | 7.690758392  |
| 10336 | -0.352108471 | -0.352108 | -0.352108471 | 2.299826999  | 3.009752481  | 2.65478974   |
| 10342 | -0.352108471 | -0.352108 | -0.352108471 | 7.231334026  | 6.44889409   | 6.840114058  |
| 10344 | 4.798957482  | 4.617923  | 4.979991919  | -0.352108471 | -0.352108471 | -0.352108471 |
| 10350 | 7.155718933  | 6.0395505 | 8.271887414  | 6.13117046   | 4.137217026  | 2.143263592  |
| 10352 | 6.753390078  | 4.4969315 | 5.625160771  | 4.942702387  | 5.124543452  | 4.760861323  |
| 10360 | -0.352108471 | -0.352108 | -0.352108471 | 5.704335255  | 3.637195778  | 7.771474731  |
| 10361 | -0.352108471 | -0.352108 | -0.352108471 | 2.290721782  | 2.048128167  | 2.169424975  |
| 10362 | 8.401000743  | 6.6238559 | 4.846711094  | 7.459565715  | 8.502766296  | 9.545966877  |
| 10365 | 7.330599807  | 6.4185724 | 6.874586128  | 2.221964512  | 2.252618212  | 2.191310813  |
| 10367 | -0.352108471 | -0.352108 | -0.352108471 | 6.022050925  | 2.554928357  | 9.489173494  |
| 10370 | 6.952707338  | 7.1660146 | 6.739400116  | 9.520074913  | 11.37152226  | 10.44579859  |
| 10371 | 7.519300456  | 5.555467  | 6.537383725  | 6.056053999  | 5.685753359  | 6.426354639  |
| 10376 | 8.529817333  | 6.4660176 | 10.59361703  | 9.723338277  | 7.871676892  | 11.57499966  |
| 10379 | 5.334199106  | 6.2145415 | 5.774370319  | 6.713776402  | 9.473291939  | 3.954260865  |
| 10380 | 5.730355425  | 5.0601231 | 5.395239246  | 6.316009143  | 2.67573404   | 9.956284246  |
| 10381 | 6.273832259  | 8.1065923 | 4.441072261  | 5.284974356  | 7.125487499  | 3.444461213  |
| 10383 | 8.321012347  | 8.8776862 | 8.599349265  | 10.70816805  | 8.898919086  | 7.089670124  |
| 10384 | 5.625160771  | 5.6532998 | 5.597021732  | 3.3031696    | 3.919505936  | 2.686833264  |
| 10385 | -0.352108471 | -0.352108 | -0.352108471 | 2.515697587  | 2.12253331   | 2.908861864  |
| 10388 | -0.352108471 | -0.352108 | -0.352108471 | 3.90817742   | 8.830135761  | 6.369156591  |
| 10389 | 5.672110005  | 5.9391922 | 6.206274438  | -0.352108471 | -0.352108471 | -0.352108471 |
| 10391 | 5.784956449  | 7.2543915 | 6.519673958  | -0.352108471 | -0.352108471 | -0.352108471 |
| 10392 | 5.578084092  | 5.7494021 | 5.920720137  | -0.352108471 | -0.352108471 | -0.352108471 |
| 10397 | 6.952707338  | 6.9786128 | 6.926801914  | -0.352108471 | -0.352108471 | -0.352108471 |
| 10398 | 12.34527426  | 9.2026238 | 10.77394903  | 10.81249552  | 11.11853766  | 11.4245798   |
| 10399 | 10.12270098  | 10.385524 | 9.859878334  | 9.663736784  | 9.669177738  | 9.65829583   |
| 10400 | -0.352108471 | -0.352108 | -0.352108471 | 6.274589383  | 5.149937472  | 5.712263427  |
| 10401 | -0.352108471 | -0.352108 | -0.352108471 | 0.95025487   | -0.352108471 | 2.252618212  |
| 10402 | 3.826118735  | 4.7244087 | 5.622698566  | 0.044132154  | 0.440372779  | -0.352108471 |
| 10403 | 4.283753424  | 7.3166462 | 5.800199788  | -0.352108471 | -0.352108471 | -0.352108471 |
| 10409 | 5.963493203  | 6.6235409 | 7.283588663  | 7.462761226  | 6.280962497  | 8.644559955  |
| 10410 | 9.015732225  | 7.0557278 | 10.97573661  | 8.67383023   | 9.291255946  | 8.056404514  |
| 10412 | 7.357801878  | 5.980334  | 4.602866179  | -0.352108471 | -0.352108471 | -0.352108471 |
| 10413 | 6.280726552  | 6.3261959 | 6.303461245  | -0.352108471 | -0.352108471 | -0.352108471 |
| 10417 | 8.266065935  | 9.3178897 | 10.36971354  | 9.355765616  | 7.411055208  | 8.383410412  |
| 10419 | -0.352108471 | -0.352108 | -0.352108471 | 8.68052251   | 7.025721295  | 5.37092008   |
| 10421 | 7.556752908  | 5.5232397 | 3.48972653   | 7.488588854  | 10.14014613  | 4.837031579  |
| 10423 | 5.284974356  | 5.4779632 | 5.091985502  | 0.026433033  | 9.051075133  | 4.538754083  |

|       |              |           |              |              |              |              |
|-------|--------------|-----------|--------------|--------------|--------------|--------------|
| 10424 | 4.434314669  | 4.4826926 | 4.385936778  | 3.818098858  | 4.482692559  | 3.153505157  |
| 10427 | 6.801813774  | 5.5092133 | 8.094414283  | 3.274533615  | 5.88700099   | 8.499468364  |
| 10428 | -0.352108471 | -0.352108 | -0.352108471 | 5.50759102   | 6.409127749  | 5.958359385  |
| 10430 | -0.352108471 | -0.352108 | -0.352108471 | 3.33540524   | 3.585121301  | 3.834837363  |
| 10432 | 4.833143003  | 3.136327  | 1.439510935  | -0.352108471 | -0.352108471 | -0.352108471 |
| 10435 | -0.352108471 | -0.352108 | -0.352108471 | 6.220691285  | 5.898665446  | 6.542717123  |
| 10439 | -0.352108471 | -0.352108 | -0.352108471 | 2.419557138  | 5.191222747  | -0.352108471 |
| 10440 | 8.722282842  | 6.3160723 | 7.51917757   | 5.657236274  | 6.235921161  | 6.814606048  |
| 10443 | -0.352108471 | -0.352108 | -0.352108471 | 4.690341824  | 5.928198256  | 5.30927004   |
| 10444 | -0.352108471 | -0.352108 | -0.352108471 | 6.260835661  | 6.073654487  | 6.448016836  |
| 10445 | 6.886095759  | 7.1849197 | 6.587271834  | 6.345275458  | 3.581074346  | 9.109476569  |
| 10447 | 5.354685649  | 4.9445505 | 5.764820791  | 3.681745094  | 7.376877638  | 5.529311366  |
| 10449 | 5.354685649  | 5.3835036 | 5.325867653  | -0.352108471 | -0.352108471 | -0.352108471 |
| 10452 | -0.352108471 | -0.352108 | -0.352108471 | 5.546954141  | 7.936269959  | 6.74161205   |
| 10456 | 8.925224375  | 5.4463076 | 7.185765998  | 5.114516014  | 5.507852562  | 4.721179467  |
| 10457 | 4.806600156  | 5.0171364 | 5.227672716  | 8.122647789  | 5.760563852  | 6.94160582   |
| 10458 | -0.352108471 | -0.352108 | -0.352108471 | 2.024343053  | 0.988773321  | 3.059912784  |
| 10459 | 4.672248391  | 5.7184598 | 6.764671143  | 4.927679215  | 7.627130039  | 2.228228391  |
| 10460 | -0.352108471 | -0.352108 | -0.352108471 | 6.220238598  | 6.246629235  | 6.193847962  |
| 10461 | -0.352108471 | -0.352108 | -0.352108471 | 0.874413692  | -0.352108471 | 2.100935855  |
| 10465 | 7.140442362  | 4.7379421 | 5.939192221  | -0.352108471 | -0.352108471 | -0.352108471 |
| 10466 | -0.352108471 | -0.352108 | -0.352108471 | 6.626175926  | 5.88700099   | 5.147826054  |
| 10467 | -0.352108471 | -0.352108 | -0.352108471 | 7.475171153  | 8.193060637  | 6.75728167   |
| 10468 | -0.352108471 | -0.352108 | -0.352108471 | 7.762081629  | 5.291399258  | 2.820716887  |
| 10471 | 6.634368726  | 5.879724  | 6.257046343  | 8.004900657  | 6.545950789  | 5.08700092   |
| 10473 | -0.352108471 | -0.352108 | -0.352108471 | 2.268008971  | 2.357098027  | 2.446187082  |
| 10474 | -0.352108471 | -0.352108 | -0.352108471 | 6.523594479  | 8.238413277  | 4.80877568   |
| 10475 | 5.326927409  | 5.2047476 | 5.449107178  | 2.873046469  | 1.337497878  | 4.40859506   |
| 10476 | 3.127737875  | 2.8191828 | 3.436292982  | 7.082757193  | 7.687916929  | 6.477597457  |
| 10477 | 5.794304679  | 5.5601747 | 5.677239679  | 6.65835028   | 6.123867278  | 5.589384276  |
| 10480 | 9.139523774  | 6.3034612 | 3.467398716  | 8.508685238  | 6.997455924  | 5.48622661   |
| 10482 | 5.625160771  | 5.6532998 | 5.597021732  | 6.804723141  | 6.821025802  | 6.788420481  |
| 10483 | 3.519905526  | 5.4283939 | 7.336882222  | 8.361059188  | 5.004585697  | 6.682822443  |
| 10484 | 1.392109249  | 3.136327  | -0.352108471 | 4.708211873  | 6.566381484  | 5.637296679  |
| 10487 | 6.162962842  | 6.3691566 | 6.575350339  | 8.490904822  | 8.878126987  | 8.103682657  |
| 10488 | 3.127737875  | 4.5453335 | 1.710142232  | 8.293951239  | 7.349917404  | 6.405883568  |
| 10489 | 6.276090343  | 6.5191546 | 6.033026063  | -0.352108471 | -0.352108471 | -0.352108471 |
| 10490 | -0.352108471 | -0.352108 | -0.352108471 | 6.886610445  | 7.264090544  | 6.509130346  |
| 10491 | 7.03729673   | 9.2389969 | 8.138146831  | 6.434788104  | 7.35694753   | 8.279106956  |
| 10492 | 3.635213903  | 5.5959531 | 4.615583513  | 7.135075351  | 7.591999306  | 6.678151396  |
| 10493 | 7.623136656  | 8.9114007 | 8.267268675  | 7.642665151  | 9.0676641    | 8.355164626  |
| 10497 | 5.45176171   | 5.1799508 | 5.723572646  | 0.228373553  | 0.808855576  | -0.352108471 |
| 10498 | 8.023219797  | 6.7737408 | 5.524261762  | 8.563144682  | 6.251034844  | 3.938925005  |
| 10499 | 4.916925479  | 5.3875687 | 5.152247113  | -0.352108471 | -0.352108471 | -0.352108471 |
| 10507 | -0.352108471 | -0.352108 | -0.352108471 | 6.25897455   | 6.454261972  | 6.649549394  |
| 10513 | 2.465782294  | 1.6698571 | 0.873932005  | 5.716588855  | 6.509641199  | 6.113115027  |
| 10514 | -0.352108471 | -0.352108 | -0.352108471 | 5.734172375  | 6.450220033  | 5.018124717  |

|       |              |           |              |              |              |              |
|-------|--------------|-----------|--------------|--------------|--------------|--------------|
| 10516 | -0.352108471 | -0.352108 | -0.352108471 | 5.909224886  | 10.63440845  | 8.271816669  |
| 10519 | -0.352108471 | -0.352108 | -0.352108471 | 6.556689902  | 7.369126349  | 5.744253454  |
| 10520 | -0.352108471 | -0.352108 | -0.352108471 | 6.08682898   | 5.912808598  | 6.260849361  |
| 10521 | 6.926801914  | 6.9268019 | 6.926801914  | 5.263851904  | 5.315258837  | 5.212444972  |
| 10523 | 6.320335654  | 8.5473925 | 7.433864099  | 8.162696129  | 3.387440303  | 5.775068216  |
| 10524 | -0.352108471 | -0.352108 | -0.352108471 | 1.778924448  | 2.252618212  | 1.305230684  |
| 10525 | 7.496938343  | 3.868905  | 11.12497167  | 6.621168045  | 5.677165024  | 7.565171067  |
| 10526 | -0.352108471 | -0.352108 | -0.352108471 | 9.315286188  | 3.423026993  | 6.369156591  |
| 10527 | 7.926137273  | 6.0088852 | 6.967511245  | 6.671713129  | 7.152037191  | 7.632361252  |
| 10528 | 5.948556941  | 5.6886226 | 5.428688354  | 8.52602621   | 7.04039671   | 7.78321146   |
| 10529 | 5.980334028  | 8.9859357 | 2.974732375  | 5.017136436  | 3.89200288   | 6.142269992  |
| 10531 | 1.383520155  | -0.352108 | 3.119148782  | 6.859217306  | 6.873045007  | 6.845389604  |
| 10534 | -0.352108471 | -0.352108 | -0.352108471 | 7.749716414  | 8.825757934  | 6.673674894  |
| 10536 | 7.25123391   | 9.0686893 | 8.159961629  | 6.909421119  | 6.277861749  | 7.540980488  |
| 10539 | 5.701328676  | 5.8191452 | 5.583512151  | 6.506485631  | 7.808929589  | 7.15770761   |
| 10540 | 6.394059102  | 3.7104763 | 5.052267685  | 9.310246915  | 7.776096252  | 6.241945589  |
| 10541 | 7.551136183  | 7.5003787 | 7.601893664  | 6.306122915  | 6.33538923   | 6.276856601  |
| 10542 | 6.332466669  | 6.9950824 | 5.669850919  | -0.352108471 | -0.352108471 | -0.352108471 |
| 10544 | -0.352108471 | -0.352108 | -0.352108471 | 5.369332089  | 5.383503645  | 5.355160532  |
| 10548 | 6.97953737   | 6.7425776 | 6.861057494  | -0.352108471 | -0.352108471 | -0.352108471 |
| 10549 | 7.134723344  | 6.336836  | 6.735779686  | 7.163203647  | 5.168537565  | 6.165870606  |
| 10550 | 6.954787303  | 4.422458  | 5.688622647  | 7.973156313  | 7.165804888  | 6.358453463  |
| 10552 | 9.081164901  | 7.4157943 | 5.750423757  | 3.169979196  | 6.150136183  | 4.66005769   |
| 10553 | -0.352108471 | -0.352108 | -0.352108471 | 6.325740245  | 5.821410838  | 5.317081431  |
| 10554 | 3.284245804  | 1.9518701 | 2.618057952  | -0.352108471 | -0.352108471 | -0.352108471 |
| 10555 | 1.392109249  | 3.136327  | -0.352108471 | 6.988612598  | 7.364389464  | 7.74016633   |
| 10556 | 4.954063105  | 4.5796184 | 4.205173639  | 6.907068059  | 4.604607385  | 5.755837722  |
| 10558 | 5.676689474  | 6.201695  | 5.939192221  | -0.352108471 | -0.352108471 | -0.352108471 |
| 10564 | 5.838496068  | 6.9675112 | 8.096526422  | 6.95467348   | 5.942660345  | 4.93064721   |
| 10565 | -0.352108471 | -0.352108 | -0.352108471 | 5.595814675  | 5.017136436  | 4.438458196  |
| 10567 | 7.621561615  | 6.258182  | 6.939871798  | 7.444308991  | 6.933209143  | 7.95540884   |
| 10572 | -0.352108471 | -0.352108 | -0.352108471 | 5.357169056  | 6.235352281  | 7.113535507  |
| 10573 | 8.898919277  | 6.6675036 | 7.78321146   | 7.600081918  | 6.283129722  | 6.94160582   |
| 10574 | 6.667442303  | 6.7286295 | 6.606255082  | 8.101097862  | 7.624442075  | 7.147786288  |
| 10575 | -0.352108471 | -0.352108 | -0.352108471 | 6.751551888  | 5.960183956  | 7.542919819  |
| 10576 | 9.129763593  | 6.5529721 | 7.841367827  | 7.9391614    | 8.278231495  | 7.600091306  |
| 10577 | 8.351322067  | 7.4780298 | 9.224614362  | 8.481181495  | 7.609959778  | 6.738738061  |
| 10581 | 6.170862652  | 3.734353  | 8.607372283  | 8.706814134  | 8.164107005  | 8.43546057   |
| 10587 | 3.56024929   | 4.0510794 | 3.805664353  | 6.692058426  | 7.953646928  | 5.430469923  |
| 10589 | 8.371322004  | 9.8948286 | 6.847815431  | 8.990620862  | 8.792533605  | 8.891577233  |
| 10591 | -0.352108471 | -0.352108 | -0.352108471 | 7.099691722  | 6.056053999  | 5.012416276  |
| 10592 | 2.553073296  | -0.352108 | 5.458255064  | 2.686833264  | 2.686833264  | 2.686833264  |
| 10594 | 4.999149256  | 5.9558997 | 6.912650242  | 7.863190169  | 7.899243108  | 7.881216638  |
| 10595 | 1.392109249  | 3.136327  | -0.352108471 | 5.38675695   | 2.386756102  | 8.386757799  |
| 10598 | 7.609255075  | 7.6152586 | 7.603251574  | 4.977710418  | 5.054280952  | 4.901139884  |
| 10602 | 3.571508387  | 5.5279483 | 4.549728355  | 7.760506878  | 7.374725876  | 6.988944873  |
| 10605 | 9.185315806  | 8.2032738 | 7.221231853  | 8.032080022  | 4.341045674  | 6.186562848  |

|       |              |           |              |              |              |              |
|-------|--------------|-----------|--------------|--------------|--------------|--------------|
| 10606 | 7.804062284  | 7.9704012 | 7.88723175   | 11.67778911  | 5.289041695  | 8.483415404  |
| 10607 | 3.127737875  | 5.4897166 | 0.765759116  | 5.169157826  | 5.554090283  | 4.784225368  |
| 10608 | 5.308304737  | 5.9391922 | 6.570079706  | 6.886610445  | 4.87424533   | 8.89897556   |
| 10609 | 4.53883581   | 7.6675845 | 6.10321016   | 6.704359571  | 7.564061146  | 5.844657995  |
| 10611 | 7.278126217  | 7.6401479 | 7.459137062  | 9.127448217  | 5.55963739   | 7.343542803  |
| 10612 | 5.990176999  | 5.6251608 | 5.260144544  | 5.980334028  | 6.583157653  | 5.377510404  |
| 10613 | -0.352108471 | -0.352108 | -0.352108471 | 2.902991023  | 3.119148782  | 2.686833264  |
| 10616 | 6.735779686  | 5.1832398 | 8.28831954   | 4.065625615  | 7.261849028  | 5.663737322  |
| 10618 | 7.413868407  | 6.5797638 | 6.996816126  | 8.307099638  | 7.936818749  | 8.121959194  |
| 10621 | 6.369156591  | 6.3831515 | 6.355161685  | -0.352108471 | -0.352108471 | -0.352108471 |
| 10626 | 6.927337071  | 7.2952014 | 6.559472732  | 3.356392206  | 1.646479888  | 5.066304524  |
| 10627 | 5.316351434  | 7.2698636 | 9.22337579   | 8.96475715   | 8.616158512  | 8.790457831  |
| 10628 | -0.352108471 | -0.352108 | -0.352108471 | 2.983199304  | 3.119148782  | 3.25509826   |
| 10631 | 3.805664353  | 3.9195059 | 3.69182277   | 7.369305842  | 7.386082653  | 7.35252903   |
| 10632 | -0.352108471 | -0.352108 | -0.352108471 | 7.305295945  | 6.833353607  | 7.069324776  |
| 10634 | 6.273832259  | 4.8230783 | 7.724586246  | 7.492124558  | 6.77374078   | 6.055357002  |
| 10636 | -0.352108471 | -0.352108 | -0.352108471 | 4.73755266   | 4.843308497  | 4.631796822  |
| 10640 | 6.104376826  | 6.1047983 | 6.10521979   | -0.352108471 | -0.352108471 | -0.352108471 |
| 10644 | 1.392109249  | 2.929757  | -0.145538461 | 9.028372788  | 6.468732402  | 7.748552595  |
| 10645 | 6.379245937  | 6.8024304 | 6.590838154  | 6.225468335  | 5.406240744  | 7.044695926  |
| 10652 | 5.364951066  | 6.3409239 | 5.852937462  | 7.136603639  | 7.475108298  | 6.79809898   |
| 10654 | 6.121528769  | 5.2195891 | 7.023468447  | -0.352108471 | -0.352108471 | -0.352108471 |
| 10655 | 4.337205319  | 5.247402  | 4.792303669  | -0.352108471 | -0.352108471 | -0.352108471 |
| 10656 | -0.352108471 | -0.352108 | -0.352108471 | 4.233765303  | 5.370404518  | 4.80208491   |
| 10657 | -0.352108471 | -0.352108 | -0.352108471 | 8.046801131  | 7.535706852  | 8.557895409  |
| 10658 | -0.352108471 | -0.352108 | -0.352108471 | 6.12990004   | 9.747924613  | 2.511875468  |
| 10664 | -0.352108471 | -0.352108 | -0.352108471 | 5.810973776  | 4.985256248  | 6.636691304  |
| 10670 | 8.014580832  | 6.9134889 | 5.812396964  | -0.352108471 | -0.352108471 | -0.352108471 |
| 10671 | 5.722516228  | 4.9156773 | 5.31909676   | 6.412893955  | 5.034077076  | 5.723485516  |
| 10672 | 5.677070927  | 6.4350371 | 6.056053999  | 7.165804888  | 10.02534264  | 4.306267139  |
| 10681 | 6.954372958  | 7.8965146 | 8.838656231  | 0.156551639  | 1.622488375  | 3.088425111  |
| 10682 | -0.352108471 | -0.352108 | -0.352108471 | 5.775068216  | 6.368438967  | 5.181697465  |
| 10686 | 3.948901707  | 5.0082279 | 6.067554021  | 3.103185284  | 2.30692697   | 3.899443597  |
| 10687 | 7.816982761  | 9.0223744 | 8.419678556  | 7.65696834   | 7.563313371  | 7.469658401  |
| 10694 | 6.861057494  | 9.381584  | 4.340531017  | 8.373719206  | 7.615410705  | 7.994564955  |
| 10695 | -0.352108471 | -0.352108 | -0.352108471 | 7.567749599  | 5.957028947  | 9.178470251  |
| 10712 | 4.353686578  | 5.5882244 | 3.119148782  | 2.169424975  | 2.191310813  | 2.147539136  |
| 10714 | -0.352108471 | -0.352108 | -0.352108471 | 6.425371423  | 5.229586607  | 7.621156238  |
| 10720 | 2.728425652  | 5.3546856 | 7.980945646  | 0.476561106  | -0.352108471 | 1.305230684  |
| 10723 | 5.257563032  | 6.6856354 | 5.971599196  | -0.352108471 | -0.352108471 | -0.352108471 |
| 10724 | -0.352108471 | -0.352108 | -0.352108471 | 8.449295725  | 7.224139774  | 5.998983823  |
| 10725 | 7.995086847  | 6.3180937 | 4.641100514  | 0.440372779  | 0.440372779  | 0.440372779  |
| 10726 | 6.001716416  | 6.6073775 | 7.213038502  | 5.412561087  | 3.670571575  | 7.1545506    |
| 10728 | 6.026242499  | 9.02932   | 7.527781259  | 10.08474722  | 7.025721295  | 3.966695367  |
| 10730 | 3.735110573  | 4.0310378 | 4.326965036  | 4.748497651  | 7.25945936   | 6.003978506  |
| 10739 | 7.140329269  | 5.3773391 | 6.258834195  | -0.352108471 | -0.352108471 | -0.352108471 |
| 10740 | 5.318797552  | 6.146078  | 4.4915171    | 6.265347842  | 6.215464554  | 6.31523113   |



|       |              |           |              |              |              |              |
|-------|--------------|-----------|--------------|--------------|--------------|--------------|
| 10741 | 5.991047043  | 5.365845  | 5.678446034  | 7.312772752  | 5.589157833  | 9.036387672  |
| 10743 | -0.352108471 | -0.352108 | -0.352108471 | 2.686833264  | 2.686833264  | 2.686833264  |
| 10746 | 7.822138356  | 4.4209192 | 6.121528769  | -0.352108471 | -0.352108471 | -0.352108471 |
| 10749 | 8.120300038  | 8.1635425 | 8.077057613  | 8.22430719   | 8.257485986  | 8.191128393  |
| 10755 | 7.052946286  | 6.9121615 | 7.193731058  | 7.211532041  | 7.572743317  | 7.392137679  |
| 10758 | 7.152376959  | 6.6835209 | 6.214664764  | 3.556644279  | 1.80072102   | 2.678682649  |
| 10762 | 7.912896449  | 7.3238652 | 6.734833992  | 0.86953393   | 0.808855576  | 0.930212283  |
| 10763 | 6.090808341  | 6.1079622 | 6.073654487  | 7.225513213  | 7.246938498  | 7.204087928  |
| 10765 | 3.065321785  | 4.1788999 | 5.292478106  | 4.688079496  | 3.585121301  | 2.482163107  |
| 10766 | -0.352108471 | -0.352108 | -0.352108471 | 7.090076417  | 7.100490419  | 7.079662414  |
| 10767 | -0.352108471 | -0.352108 | -0.352108471 | 6.609543024  | 5.066206144  | 8.152879903  |
| 10771 | -0.352108471 | -0.352108 | -0.352108471 | 3.585121301  | 3.615460478  | 3.554782125  |
| 10772 | 10.42540579  | 6.8312892 | 3.237172628  | 5.983736712  | 8.362626905  | 3.604846519  |
| 10776 | 6.873791272  | 7.617511  | 6.130071529  | 3.688062254  | 11.05517075  | 7.3716165    |
| 10780 | 7.429967756  | 6.2859506 | 6.857959174  | 1.530736894  | 0.808855576  | 2.252618212  |
| 10785 | 5.152247113  | 5.0756167 | 5.228877567  | -0.352108471 | -0.352108471 | -0.352108471 |
| 10787 | 7.120834324  | 6.991795  | 6.862755771  | 5.043358363  | 7.883991467  | 6.463674915  |
| 10791 | -0.352108471 | -0.352108 | -0.352108471 | 6.923295051  | 6.946414218  | 6.900175883  |
| 10793 | 7.131107385  | 5.3340027 | 6.232555018  | 5.652071908  | 3.887516359  | 7.416627456  |
| 10797 | 1.099634066  | 1.7836987 | 2.467763399  | 4.216655461  | 4.902742936  | 4.559699198  |
| 10801 | 5.284974356  | 5.4829684 | 5.086980282  | 10.11385558  | 8.533000693  | 6.952145804  |
| 10802 | -0.352108471 | -0.352108 | -0.352108471 | 6.168642212  | 6.859217306  | 7.549792399  |
| 10807 | -0.352108471 | -0.352108 | -0.352108471 | 5.663737322  | 5.665786693  | 5.661687951  |
| 10808 | 6.84410225   | 7.0510046 | 6.947553426  | 6.056053999  | 6.205260569  | 5.906847429  |
| 10810 | -0.352108471 | -0.352108 | -0.352108471 | 4.269304063  | 7.990496018  | 6.12990004   |
| 10813 | -0.352108471 | -0.352108 | -0.352108471 | 8.702129534  | 4.436188645  | 6.56915909   |
| 10818 | 7.051041553  | 2.8429728 | 4.947007189  | 2.314044813  | 7.290125007  | 4.80208491   |
| 10824 | 9.084521048  | 7.4698766 | 5.855232142  | 0.044132154  | -0.352108471 | 0.440372779  |
| 10826 | 4.663000528  | 2.7560812 | 6.569919856  | 4.295277691  | 6.440038111  | 8.584798531  |
| 10844 | -0.352108471 | -0.352108 | -0.352108471 | 4.66005769   | 4.688318557  | 4.631796822  |
| 10845 | -0.352108471 | -0.352108 | -0.352108471 | 6.186562848  | 4.847227721  | 7.525897976  |
| 10846 | -0.352108471 | -0.352108 | -0.352108471 | 4.486432534  | 4.66005769   | 4.833682846  |
| 10847 | 6.861057494  | 5.9020163 | 7.82009865   | -0.352108471 | -0.352108471 | -0.352108471 |
| 10848 | 2.588601447  | 5.5293114 | -0.352108471 | -0.352108471 | -0.352108471 | -0.352108471 |
| 10849 | 7.05185842   | 7.672332  | 7.362095214  | 5.752394131  | 6.004748528  | 6.257102924  |
| 10855 | 5.326927409  | 5.5293114 | 5.124543452  | 1.305230684  | 1.305230684  | 1.305230684  |
| 10856 | -0.352108471 | -0.352108 | -0.352108471 | 10.9961967   | 4.420057488  | 7.708127092  |
| 10857 | -0.352108471 | -0.352108 | -0.352108471 | 2.686117285  | 8.760853746  | 5.723485516  |
| 10858 | 2.803125457  | -0.352108 | 5.958359385  | 2.099323895  | 2.147539136  | 2.051108653  |
| 10863 | -0.352108471 | -0.352108 | -0.352108471 | 4.75330713   | 5.017136436  | 5.280965741  |
| 10865 | 7.792033924  | 7.6064982 | 7.977569637  | 9.183909136  | 6.713776402  | 4.243643668  |
| 10867 | 6.450950486  | 6.4912436 | 6.531536689  | 6.186562848  | 7.520384783  | 4.852740914  |
| 10868 | -0.352108471 | -0.352108 | -0.352108471 | 1.783698732  | -0.352108471 | 3.919505936  |
| 10869 | 4.386224296  | 4.0408587 | 4.731589924  | 3.51352536   | 6.758753021  | 10.00398068  |
| 10875 | 4.104525714  | 2.15095   | 3.127737875  | 3.722142557  | 1.347343115  | 2.534742836  |
| 10881 | -0.352108471 | -0.352108 | -0.352108471 | 6.218320354  | 6.235921161  | 6.253521967  |
| 10885 | -0.352108471 | -0.352108 | -0.352108471 | 4.297639083  | 5.673208817  | 2.922069348  |

|       |              |           |              |              |              |              |
|-------|--------------|-----------|--------------|--------------|--------------|--------------|
| 10886 | 6.30347915   | 3.9801886 | 5.141833898  | 0.791292145  | 0.440372779  | 1.14221151   |
| 10888 | 7.681594358  | 6.2474636 | 4.813332809  | 5.692910329  | 5.844279396  | 5.995648463  |
| 10890 | 5.800199788  | 5.825168  | 5.775231583  | -0.352108471 | -0.352108471 | -0.352108471 |
| 10893 | -0.352108471 | -0.352108 | -0.352108471 | 4.835137762  | 4.613679539  | 4.724408651  |
| 10897 | 7.436342955  | 4.3155755 | 1.194808109  | 9.327401888  | 7.123643365  | 4.919884842  |
| 10899 | 5.69427937   | 6.6073775 | 7.520475548  | 9.582417934  | 6.272010444  | 7.927214189  |
| 10902 | 6.24569579   | 5.6326887 | 5.939192221  | 6.905535737  | 9.296248482  | 4.514822992  |
| 10904 | 3.580159247  | 5.5204564 | 4.550307802  | 7.883781477  | 7.629862983  | 8.13769997   |
| 10905 | 4.657831069  | 5.3764418 | 5.017136436  | 0.044132154  | -0.352108471 | 0.440372779  |
| 10907 | 6.056053999  | 6.0736545 | 6.038453511  | 5.637296679  | 5.653299811  | 5.621293547  |
| 10908 | 6.657217604  | 7.1205872 | 6.193847962  | -0.352108471 | -0.352108471 | -0.352108471 |
| 10910 | -0.352108471 | -0.352108 | -0.352108471 | 7.400204331  | 7.423933442  | 7.376475219  |
| 10912 | 2.938787496  | 4.9470072 | 6.955226882  | -0.352108471 | -0.352108471 | -0.352108471 |
| 10914 | -0.352108471 | -0.352108 | -0.352108471 | 7.462761226  | 9.504921948  | 5.420600504  |
| 10916 | -0.352108471 | -0.352108 | -0.352108471 | 8.091794594  | 9.167136066  | 7.016453122  |
| 10919 | 5.284974356  | 5.4213407 | 5.148607968  | -0.352108471 | -0.352108471 | -0.352108471 |
| 10920 | -0.352108471 | -0.352108 | -0.352108471 | 5.505017309  | 7.185533606  | 6.345275458  |
| 10921 | 7.593149813  | 6.7469441 | 8.439355505  | 8.558377898  | 6.751466056  | 4.944554215  |
| 10922 | 7.186619416  | 6.3999555 | 7.973283314  | 6.539318808  | 7.272998452  | 5.805639164  |
| 10923 | 6.18142457   | 6.033653  | 6.107538801  | 6.946330252  | 7.165707925  | 6.726952578  |
| 10926 | 5.523239719  | 4.6090888 | 6.437390683  | -0.352108471 | -0.352108471 | -0.352108471 |
| 10928 | -0.352108471 | -0.352108 | -0.352108471 | 5.903760504  | 8.491044216  | 3.316476792  |
| 10929 | 5.360763101  | 6.3055197 | 7.250276371  | 6.412230992  | 7.799418975  | 7.105824984  |
| 10933 | 5.374265435  | 6.0029799 | 5.688622647  | 8.260049597  | 7.552716094  | 8.9673831    |
| 10938 | 3.997713568  | 9.0770539 | 6.537383725  | 5.452431129  | 6.577483275  | 7.702535421  |
| 10939 | 4.046609087  | 7.6592658 | 5.852937462  | 1.873505285  | 3.919505936  | 5.965506587  |
| 10944 | 12.71762375  | 9.2463753 | 5.775126873  | 7.344731636  | 4.932969915  | 9.756493356  |
| 10945 | 6.059664267  | 7.3777551 | 8.695846     | 7.190571761  | 6.162641978  | 8.218501544  |
| 10946 | -0.352108471 | -0.352108 | -0.352108471 | 6.682822443  | 6.698467242  | 6.667177643  |
| 10948 | 5.90029238   | 4.2543109 | 7.546273833  | -0.352108471 | -0.352108471 | -0.352108471 |
| 10949 | 8.100408188  | 7.7274531 | 7.91393063   | 9.810882518  | 8.610864578  | 7.410846638  |
| 10950 | 5.89144105   | 6.4681519 | 7.044862685  | 5.772932242  | 6.667544955  | 6.220238598  |
| 10951 | -0.352108471 | -0.352108 | -0.352108471 | 5.263851904  | 5.20849783   | 5.319205979  |
| 10952 | -0.352108471 | -0.352108 | -0.352108471 | 6.944790218  | 7.643140836  | 8.341491454  |
| 10953 | 5.55876787   | 5.3063339 | 5.811201816  | 5.095423988  | 5.598414606  | 4.592433369  |
| 10954 | -0.352108471 | -0.352108 | -0.352108471 | 4.237154657  | 3.119148782  | 5.355160532  |
| 10955 | -0.352108471 | -0.352108 | -0.352108471 | 6.949901658  | 6.659392646  | 7.240410671  |
| 10956 | 7.342454581  | 6.5849872 | 8.099921982  | 5.931347273  | 8.819004217  | 7.375175745  |
| 10959 | 7.088053344  | 8.5564836 | 7.822268476  | 5.758739304  | 7.349917404  | 8.941095503  |
| 10960 | 4.910343046  | 5.9391922 | 6.968041397  | 8.215823114  | 5.895186222  | 7.055504668  |
| 10961 | 5.493783215  | 5.5293114 | 5.458255064  | 6.32531018   | 6.33538923   | 6.31523113   |
| 10963 | 7.504512579  | 8.5235906 | 8.014051606  | 7.000149166  | 7.009957676  | 7.019766185  |
| 10969 | 6.600014783  | 6.479333  | 6.720696571  | 7.326356364  | 7.342696275  | 7.310016454  |
| 10970 | 8.533806571  | 9.8410545 | 7.226558684  | 8.540082824  | 11.07483001  | 6.005335637  |
| 10971 | 6.575958791  | 5.0244408 | 5.800199788  | 8.816988496  | 8.754379576  | 8.879597416  |
| 10972 | 6.933588664  | 8.1348895 | 5.732287782  | 1.999631788  | 0.62969974   | 3.369563836  |
| 10975 | 6.519673958  | 6.5498529 | 6.489495002  | 7.787391935  | 7.811531416  | 7.763252455  |

|       |              |           |              |              |              |              |
|-------|--------------|-----------|--------------|--------------|--------------|--------------|
| 10978 | -0.352108471 | -0.352108 | -0.352108471 | 2.553073296  | 5.458255064  | -0.352108471 |
| 10979 | 5.297171664  | 3.3339794 | 4.315575532  | 8.777194858  | 7.752449596  | 6.727704335  |
| 10980 | -0.352108471 | -0.352108 | -0.352108471 | 7.152205469  | 7.604813664  | 8.057421859  |
| 10983 | 6.512012895  | 7.1489543 | 7.785895635  | 7.189846589  | 7.708132947  | 8.226419305  |
| 10984 | 13.56335825  | 15.361893 | 14.46262557  | 15.87876005  | 13.77892441  | 11.67908878  |
| 10985 | 5.152247113  | 8.2494846 | 2.055009582  | 6.707763664  | 5.983736712  | 5.259709759  |
| 10987 | 7.063413806  | 6.4887553 | 7.638072327  | 5.219123492  | 4.53752218   | 5.900724803  |
| 10988 | 5.493378529  | 4.6539182 | 6.332838881  | 10.43236039  | 2.840186115  | 6.636273252  |
| 10989 | 5.458403243  | 5.5291632 | 5.493783215  | 7.125111061  | 7.003799972  | 6.882488884  |
| 10992 | 5.596127468  | 7.1976093 | 6.396868383  | 8.029243459  | 9.202581337  | 6.855905582  |
| 11007 | 7.215278602  | 7.2517577 | 7.288236766  | 7.428892269  | 9.53404429   | 5.323740248  |
| 11010 | 7.259341956  | 7.5833616 | 6.935322328  | 7.69222184   | 5.723485516  | 3.754749191  |
| 11011 | 8.056536983  | 6.3703877 | 9.742686245  | 5.886342249  | 7.201489776  | 8.516637303  |
| 11014 | 7.416660475  | 7.4324764 | 7.424568434  | 7.387436362  | 6.760110864  | 7.073773613  |
| 11015 | 6.573968999  | 6.5990833 | 6.548854669  | 3.666436685  | 6.296043865  | 8.925651046  |
| 11017 | -0.352108471 | -0.352108 | -0.352108471 | 8.089684608  | 7.271069954  | 6.4524553    |
| 11018 | -0.352108471 | -0.352108 | -0.352108471 | 5.369332089  | 4.749761002  | 5.988903175  |
| 11019 | 5.939192221  | 6.8465105 | 5.031873987  | 7.975507869  | 5.19078168   | 2.406055492  |
| 11020 | -0.352108471 | -0.352108 | -0.352108471 | 2.975135281  | 2.398531246  | 2.686833264  |
| 11027 | 4.615484867  | 5.2785295 | 4.947007189  | -0.352108471 | -0.352108471 | -0.352108471 |
| 11030 | -0.352108471 | -0.352108 | -0.352108471 | 6.034128238  | 6.928292805  | 7.822457372  |
| 11031 | -0.352108471 | -0.352108 | -0.352108471 | 7.161815324  | 4.950292674  | 6.056053999  |
| 11034 | 9.769996878  | 6.9490395 | 8.359518179  | 10.7822818   | 8.69594998   | 6.609618165  |
| 11037 | 1.383520155  | -0.352108 | 3.119148782  | 0.897715333  | 2.147539136  | -0.352108471 |
| 11039 | 3.765118102  | 6.5407415 | 5.152929786  | 4.34040441   | 5.917122861  | 5.128763636  |
| 11040 | 5.50401475   | 7.073007  | 6.288510867  | -0.352108471 | -0.352108471 | -0.352108471 |
| 11041 | -0.352108471 | -0.352108 | -0.352108471 | 4.555577106  | 5.704335255  | 6.853093404  |
| 11043 | -0.352108471 | -0.352108 | -0.352108471 | 5.455463676  | 5.388370172  | 5.321276667  |
| 11047 | 7.269153621  | 5.851102  | 8.687205203  | 6.357032901  | 8.171734534  | 9.986436167  |
| 11052 | 7.852413297  | 5.8101651 | 6.831289207  | 6.545950789  | 6.302547261  | 6.789354316  |
| 11054 | 8.869117574  | 6.9217481 | 4.974378711  | 5.142321764  | 5.383503645  | 4.901139884  |
| 11057 | 7.45286166   | 7.7234618 | 7.588161717  | 6.154712819  | 6.477305467  | 6.316009143  |
| 11061 | 4.947007189  | 4.655467  | 5.238547367  | -0.352108471 | -0.352108471 | -0.352108471 |
| 11062 | -0.352108471 | -0.352108 | -0.352108471 | 2.124237496  | 1.38954684   | 2.858928152  |
| 11065 | -0.352108471 | -0.352108 | -0.352108471 | 2.811717702  | 8.104792426  | 5.458255064  |
| 11067 | 3.3648504    | 8.4357344 | 5.90029238   | -0.352108471 | -0.352108471 | -0.352108471 |
| 11070 | -0.352108471 | -0.352108 | -0.352108471 | 5.349381241  | 5.774058161  | 4.92470432   |
| 11072 | -0.352108471 | -0.352108 | -0.352108471 | 4.914839551  | 7.516304119  | 10.11776869  |
| 11073 | -0.352108471 | -0.352108 | -0.352108471 | 4.785420335  | 5.458255064  | 4.112585606  |
| 11075 | -0.352108471 | -0.352108 | -0.352108471 | 4.783315286  | 5.637296679  | 6.491278072  |
| 11078 | 8.106647193  | 9.1681739 | 7.045120488  | 8.065239467  | 8.754472096  | 7.376006837  |
| 11079 | -0.352108471 | -0.352108 | -0.352108471 | 7.605055129  | 7.827989767  | 7.382120491  |
| 11080 | 7.042523083  | 5.6436576 | 8.441388547  | -0.352108471 | -0.352108471 | -0.352108471 |
| 11083 | 7.261520038  | 7.3440039 | 7.426487691  | 4.456886199  | 4.253005516  | 4.660766883  |
| 11086 | 5.354685649  | 7.157077  | 3.55229426   | 2.230275765  | 8.108039886  | 5.169157826  |
| 11091 | 6.607377459  | 6.6215439 | 6.593211042  | 5.017136436  | 5.054280952  | 4.979991919  |
| 11092 | 6.17064887   | 1.4077347 | 10.93356303  | 3.501376714  | 5.076027132  | 4.288701923  |

|       |              |           |              |              |              |              |
|-------|--------------|-----------|--------------|--------------|--------------|--------------|
| 11094 | 6.090808341  | 7.4379003 | 4.743716385  | -0.352108471 | -0.352108471 | -0.352108471 |
| 11096 | -0.352108471 | -0.352108 | -0.352108471 | 4.378620115  | 4.66005769   | 4.941495264  |
| 11098 | 5.824288785  | 6.3630186 | 5.285558971  | 5.767743489  | 8.187620839  | 10.60749819  |
| 11100 | 7.251757684  | 6.0284557 | 8.475059698  | 7.677857161  | 8.389939172  | 8.033898167  |
| 11101 | -0.352108471 | -0.352108 | -0.352108471 | 4.189671027  | 4.456886199  | 4.724101372  |
| 11102 | 3.855349974  | 6.1832159 | 5.019282955  | 1.12335747   | 0.808855576  | 1.437859363  |
| 11105 | 5.842203299  | 6.3112981 | 5.373108463  | 5.15430558   | 5.099234515  | 5.04416345   |
| 11108 | -0.352108471 | -0.352108 | -0.352108471 | 5.407346691  | 7.064495631  | 6.235921161  |
| 11112 | 7.398193617  | 9.0806149 | 5.715772357  | 5.426431427  | 4.911884224  | 5.169157826  |
| 11116 | 8.620319187  | 5.469805  | 7.045062092  | 5.888251948  | 7.486200408  | 6.687226178  |
| 11117 | 8.841911097  | 8.5103335 | 8.178756     | 8.726834229  | 7.660833196  | 8.193833712  |
| 11118 | 7.710831709  | 4.6928925 | 6.20186208   | 1.916337486  | 1.731739118  | 2.100935855  |
| 11119 | 7.233420289  | 7.5059666 | 6.960873996  | 0.044132154  | 0.440372779  | -0.352108471 |
| 11124 | 1.946552907  | -0.352108 | 4.245214285  | 6.735779686  | 7.94416573   | 5.527393642  |
| 11128 | -0.352108471 | -0.352108 | -0.352108471 | 6.717841276  | 4.697609333  | 8.738073218  |
| 11129 | 3.127737875  | 3.136327  | 3.119148782  | 2.211943219  | 2.232575625  | 2.191310813  |
| 11130 | -0.352108471 | -0.352108 | -0.352108471 | 6.296043865  | 6.31523113   | 6.276856601  |
| 11133 | 3.797822384  | 5.6105004 | 1.985144396  | 2.929877893  | 3.012289909  | 3.094701926  |
| 11135 | 6.052917931  | 8.6859373 | 7.369427614  | 8.012846519  | 7.444308991  | 6.875771464  |
| 11136 | -0.352108471 | -0.352108 | -0.352108471 | 0.822554576  | 1.631676003  | 2.440797431  |
| 11137 | 6.735779686  | 5.6237703 | 7.847789097  | 3.864023042  | 3.615460478  | 4.112585606  |
| 11140 | 8.1471131    | 6.3828735 | 4.618633854  | 5.156707362  | 7.747185018  | 10.33766267  |
| 11142 | 8.779772799  | 5.2498882 | 7.014830488  | 6.369156591  | 8.093274212  | 4.645038969  |
| 11148 | 5.073700926  | 7.6479784 | 6.360839663  | 6.998121009  | 9.629520821  | 4.366721198  |
| 11149 | 8.607405075  | 7.5030088 | 6.398612591  | 5.478987605  | 6.845389604  | 4.112585606  |
| 11152 | 7.650812904  | 7.8275848 | 7.474040996  | 6.349497303  | 6.174080069  | 6.524914536  |
| 11156 | 5.152247113  | 4.3650797 | 5.93941455   | -0.352108471 | -0.352108471 | -0.352108471 |
| 11157 | 5.089412202  | 5.1245435 | 5.054280952  | -0.352108471 | -0.352108471 | -0.352108471 |
| 11159 | 3.693630547  | 5.1227357 | 4.408183111  | 0.228373553  | -0.352108471 | 0.808855576  |
| 11163 | 5.793573715  | 1.2367088 | 3.515141236  | 0.849500091  | -0.352108471 | 2.051108653  |
| 11164 | -0.352108471 | -0.352108 | -0.352108471 | 6.724469766  | 6.759061079  | 6.689878453  |
| 11167 | 10.79247225  | 9.6111024 | 8.42973264   | 7.588834184  | 12.72384535  | 10.15633977  |
| 11168 | -0.352108471 | -0.352108 | -0.352108471 | 10.32735114  | 2.323269217  | 6.32531018   |
| 11169 | 5.852937462  | 5.8097505 | 5.896124426  | 6.415928975  | 3.228559088  | 9.603298861  |
| 11171 | 0.531669581  | 2.2391587 | 3.94664787   | -0.352108471 | -0.352108471 | -0.352108471 |
| 11174 | 6.720370627  | 6.7508628 | 6.689878453  | 5.234766675  | 6.038453511  | 4.43107984   |
| 11176 | -0.352108471 | -0.352108 | -0.352108471 | 6.6969269    | 8.734416533  | 7.715671716  |
| 11178 | 5.970245565  | 3.8449111 | 8.095580024  | 0.044132154  | -0.352108471 | 0.440372779  |
| 11179 | 3.127737875  | 3.6552986 | 2.600177152  | 7.120691864  | 8.026083043  | 6.215300685  |
| 11180 | 6.242048279  | 5.3849084 | 7.099188177  | 0.762376451  | -0.352108471 | 1.876861374  |
| 11181 | 4.904572896  | 6.3290035 | 3.480142317  | -0.352108471 | -0.352108471 | -0.352108471 |
| 11183 | 6.137818553  | 5.9742894 | 6.056053999  | 5.284974356  | 5.315258837  | 5.254689875  |
| 11185 | 7.511491784  | 7.8525094 | 7.682000613  | 8.216186052  | 6.138007963  | 7.177097008  |
| 11186 | -0.352108471 | -0.352108 | -0.352108471 | 5.930418595  | 6.296043865  | 6.661669136  |
| 11188 | -0.352108471 | -0.352108 | -0.352108471 | 5.323929678  | 8.748862375  | 7.036396027  |
| 11189 | -0.352108471 | -0.352108 | -0.352108471 | 3.680762464  | 8.363339386  | 6.022050925  |
| 11190 | 6.336590478  | 8.5049166 | 4.168264361  | -0.352108471 | -0.352108471 | -0.352108471 |

|       |              |           |              |              |              |              |
|-------|--------------|-----------|--------------|--------------|--------------|--------------|
| 11191 | 6.303461245  | 6.9069074 | 5.70001505   | -0.352108471 | -0.352108471 | -0.352108471 |
| 11193 | -0.352108471 | -0.352108 | -0.352108471 | 6.12990004   | 6.893309616  | 5.366490464  |
| 11194 | 7.231594464  | 5.4937832 | 3.755971966  | 5.789762726  | 6.120169646  | 5.459355806  |
| 11196 | 6.553359934  | 6.9908132 | 7.428266385  | 3.252081944  | 4.163121594  | 2.341042294  |
| 11198 | 4.016045771  | 4.981965  | 3.050126516  | 6.898982206  | 6.406486527  | 5.913990848  |
| 11200 | 1.536298775  | 2.3147854 | 2.369587412  | -0.352108471 | -0.352108471 | -0.352108471 |
| 11212 | -0.352108471 | -0.352108 | -0.352108471 | 5.158940678  | 5.492491478  | 5.325716078  |
| 11213 | 5.275550329  | 4.8956643 | 5.085607333  | 3.745997314  | 4.769034835  | 2.722959794  |
| 11214 | -0.352108471 | -0.352108 | -0.352108471 | 5.094129627  | 6.180463731  | 5.637296679  |
| 11215 | 3.127737875  | 2.4920726 | 3.763403121  | 5.796604305  | 4.541711346  | 5.169157826  |
| 11218 | -0.352108471 | -0.352108 | -0.352108471 | 5.704335255  | 5.715557343  | 5.693113166  |
| 11222 | -0.352108471 | -0.352108 | -0.352108471 | 8.916076408  | 4.533253635  | 6.724665022  |
| 11224 | 9.595884353  | 8.0488847 | 11.14288406  | 10.18593386  | 11.04529834  | 9.326569381  |
| 11226 | 7.148431247  | 6.9178841 | 7.37897843   | 5.276825162  | 8.007666442  | 6.642245802  |
| 11227 | -0.352108471 | -0.352108 | -0.352108471 | 6.750973351  | 6.497182024  | 6.243390698  |
| 11228 | 5.043054533  | 8.4660625 | 6.754558526  | -0.352108471 | -0.352108471 | -0.352108471 |
| 11230 | -0.352108471 | -0.352108 | -0.352108471 | 8.151859699  | 8.292450792  | 8.222155246  |
| 11234 | -0.352108471 | -0.352108 | -0.352108471 | 2.204376426  | -0.352108471 | 4.760861323  |
| 11237 | -0.352108471 | -0.352108 | -0.352108471 | 2.567556948  | 4.602685654  | 3.585121301  |
| 11243 | -0.352108471 | -0.352108 | -0.352108471 | 6.679398756  | 8.721837549  | 4.636959963  |
| 11244 | -0.352108471 | -0.352108 | -0.352108471 | 4.09022467   | 6.686515673  | 5.388370172  |
| 11245 | 3.127737875  | 3.2744025 | 2.981073213  | 5.340345662  | 6.51496239   | 7.689579119  |
| 11252 | -0.352108471 | -0.352108 | -0.352108471 | 6.098057327  | 6.150515881  | 6.045598773  |
| 11253 | -0.352108471 | -0.352108 | -0.352108471 | 6.293823158  | 4.658849082  | 5.47633612   |
| 11257 | -0.352108471 | -0.352108 | -0.352108471 | 5.457998494  | 5.421579811  | 5.494417177  |
| 11258 | 6.497621264  | 6.3691566 | 6.240691917  | 5.759925606  | 5.804293869  | 5.715557343  |
| 11259 | 9.75740385   | 6.3968684 | 3.036332915  | 7.261737295  | 9.076451528  | 8.169094411  |
| 11260 | 8.706557066  | 4.6417007 | 6.674128879  | -0.352108471 | -0.352108471 | -0.352108471 |
| 11261 | 7.548006705  | 5.8282467 | 9.267766661  | 7.393006279  | 7.496586827  | 7.600167375  |
| 11262 | 8.431877632  | 6.6073775 | 4.782877286  | -0.352108471 | -0.352108471 | -0.352108471 |
| 11264 | 8.953660204  | 8.8575184 | 9.04980201   | 7.7927523    | 7.716178874  | 7.869325725  |
| 11267 | -0.352108471 | -0.352108 | -0.352108471 | 7.458282885  | 4.508868586  | 10.40769718  |
| 11273 | 7.771588187  | 4.8933452 | 6.332466669  | 5.813397253  | 7.05168679   | 6.432542021  |
| 11276 | 8.76655368   | 6.8161979 | 4.865842198  | 5.516329242  | 6.912428792  | 8.308528341  |
| 11277 | 3.02698104   | 5.8242888 | 8.621596529  | 6.100981295  | 6.893382753  | 6.497182024  |
| 11280 | -0.352108471 | -0.352108 | -0.352108471 | 3.720557712  | 2.921957572  | 2.123357432  |
| 11282 | 7.547345435  | 7.1250675 | 6.702789566  | 7.911746015  | 6.875966205  | 8.947525825  |
| 11283 | 5.291399258  | 5.4582551 | 5.124543452  | -0.352108471 | -0.352108471 | -0.352108471 |
| 11284 | -0.352108471 | -0.352108 | -0.352108471 | 6.087644454  | 6.101634422  | 6.073654487  |
| 11285 | 6.151585628  | 4.6029687 | 7.70020258   | 0.61505922   | 2.133542422  | 1.374300821  |
| 11311 | 5.939192221  | 7.6401003 | 4.238284093  | -0.352108471 | -0.352108471 | -0.352108471 |
| 11313 | 4.047998928  | 4.8786655 | 5.709332029  | 7.032433877  | 5.723485516  | 4.414537155  |
| 11315 | 5.951591022  | 5.6886226 | 5.425654272  | 8.236263963  | 8.832919693  | 7.639608232  |
| 11316 | 5.432975716  | 8.8916995 | 7.162337587  | 6.252567117  | 10.11190906  | 8.182238087  |
| 11320 | 9.502310428  | 7.6279944 | 8.56515243   | 6.944720985  | 10.06502239  | 3.824419582  |
| 11321 | -0.352108471 | -0.352108 | -0.352108471 | 5.457665298  | 6.596757815  | 7.735850333  |
| 11322 | -0.352108471 | -0.352108 | -0.352108471 | 2.891547989  | 6.135204448  | -0.352108471 |

|       |              |           |              |              |              |              |
|-------|--------------|-----------|--------------|--------------|--------------|--------------|
| 11328 | 4.06596187   | 4.5241994 | 4.295080645  | 5.316008865  | 8.33381536   | 6.824912113  |
| 11329 | -0.352108471 | -0.352108 | -0.352108471 | 8.270942143  | 4.758982638  | 6.51496239   |
| 11330 | 6.636323465  | 7.8297725 | 9.023221613  | 7.419575248  | 4.275131129  | 10.56401937  |
| 11331 | -0.352108471 | -0.352108 | -0.352108471 | 5.637296679  | 6.103094337  | 5.17149902   |
| 11332 | 3.72461963   | 4.0641048 | 3.894362219  | 7.113011701  | 5.47907603   | 6.296043865  |
| 11333 | 7.916001466  | 7.2266559 | 6.537310422  | 8.285380395  | 8.531441672  | 8.777502949  |
| 11334 | -0.352108471 | -0.352108 | -0.352108471 | 7.468827193  | 5.98050285   | 6.724665022  |
| 11335 | 6.090808341  | 6.1079622 | 6.073654487  | 3.119148782  | 3.119148782  | 3.119148782  |
| 11337 | 6.68088213   | 6.9786128 | 6.383151496  | 7.8557263    | 7.827584812  | 7.883867788  |
| 11338 | 6.818986369  | 6.8576112 | 6.896236025  | 8.132440628  | 6.118807471  | 10.14607378  |
| 11340 | -0.352108471 | -0.352108 | -0.352108471 | 6.312019947  | 7.036396027  | 7.760772106  |
| 11343 | 4.429949807  | 3.136327  | 5.723572646  | 7.395526103  | 6.367936567  | 8.423115639  |
| 11344 | 6.767634029  | 6.6898785 | 6.845389604  | 7.100428707  | 7.327812407  | 6.873045007  |
| 22794 | 3.400971508  | 5.054281  | 6.707590396  | 2.685883497  | 2.751563581  | 2.620203413  |
| 22796 | -0.352108471 | -0.352108 | -0.352108471 | 6.12990004   | 6.135204448  | 6.124595632  |
| 22800 | -0.352108471 | -0.352108 | -0.352108471 | 5.095423988  | 4.533492242  | 5.657355734  |
| 22801 | 7.05393529   | 5.9629858 | 8.144884797  | 7.262668404  | 8.076280549  | 8.889892695  |
| 22803 | -0.352108471 | -0.352108 | -0.352108471 | 5.575983727  | 5.588224375  | 5.563743079  |
| 22806 | 8.774572407  | 8.0637228 | 9.485422006  | 8.810644235  | 7.079106891  | 7.944875563  |
| 22807 | -0.352108471 | -0.352108 | -0.352108471 | 3.119148782  | 5.659140661  | 0.579156902  |
| 22808 | -0.352108471 | -0.352108 | -0.352108471 | 5.461162703  | 4.66005769   | 3.858952676  |
| 22809 | 2.513339833  | 0.4886953 | 1.501017585  | 6.745152057  | 7.232708855  | 6.25759526   |
| 22818 | -0.352108471 | -0.352108 | -0.352108471 | 5.069628453  | 7.112080183  | 9.154531912  |
| 22820 | 6.650702363  | 6.3538237 | 6.502263028  | 10.05931917  | 7.082269275  | 4.105219384  |
| 22821 | -0.352108471 | -0.352108 | -0.352108471 | 6.262494648  | 6.428056267  | 6.345275458  |
| 22822 | 8.828377374  | 7.3217512 | 5.815124983  | 5.504438215  | 3.228350737  | 7.780525694  |
| 22826 | 2.063269944  | 7.1678971 | 4.615583513  | 7.921737327  | 6.534540863  | 7.228139095  |
| 22827 | 5.90068335   | 4.9841517 | 4.067620061  | 6.74407332   | 8.271827838  | 5.216318802  |
| 22828 | -0.352108471 | -0.352108 | -0.352108471 | 6.433214732  | 5.958359385  | 5.483504037  |
| 22834 | 6.06950748   | 5.3512458 | 5.710376656  | 1.988898614  | 2.100935855  | 1.876861374  |
| 22836 | 5.398878921  | 7.0635004 | 6.231189673  | 8.280622695  | 8.120985773  | 7.961348851  |
| 22837 | 6.603683995  | 4.7735613 | 5.688622647  | -0.352108471 | -0.352108471 | -0.352108471 |
| 22838 | 5.555777437  | 5.6532998 | 5.458255064  | -0.352108471 | -0.352108471 | -0.352108471 |
| 22839 | 6.415928975  | 6.1928009 | 6.639057057  | 8.413413636  | 2.901574126  | 5.657493881  |
| 22841 | 5.980334028  | 6.7313264 | 5.229341628  | -0.352108471 | -0.352108471 | -0.352108471 |
| 22844 | 7.179763278  | 9.2242692 | 8.202016251  | -0.352108471 | -0.352108471 | -0.352108471 |
| 22845 | -0.352108471 | -0.352108 | -0.352108471 | 6.747271561  | 6.773846551  | 6.720696571  |
| 22846 | -0.352108471 | -0.352108 | -0.352108471 | 8.404182358  | 4.361564596  | 6.382873477  |
| 22848 | 7.951873779  | 9.2014373 | 10.45100074  | 9.801249887  | 5.584100902  | 7.692675395  |
| 22850 | -0.352108471 | -0.352108 | -0.352108471 | 2.686833264  | 2.686833264  | 2.686833264  |
| 22853 | -0.352108471 | -0.352108 | -0.352108471 | 1.968661759  | 1.965500585  | 1.971822932  |
| 22858 | 5.857260806  | 5.5954997 | 5.333738511  | 2.26457781   | 2.523191309  | 2.393884559  |
| 22861 | -0.352108471 | -0.352108 | -0.352108471 | 2.18764845   | 1.383520155  | 0.579391861  |
| 22862 | -0.352108471 | -0.352108 | -0.352108471 | 7.600205102  | 4.119029636  | 5.859617369  |
| 22863 | 6.658023207  | 5.7516583 | 7.564388073  | 4.420541739  | 4.197167339  | 4.643916139  |
| 22864 | 5.658752616  | 4.4996979 | 3.340643085  | 4.977732308  | 6.616664157  | 8.255596007  |
| 22866 | -0.352108471 | -0.352108 | -0.352108471 | 6.382873477  | 8.529349449  | 4.236397505  |



|       |              |           |              |              |              |              |
|-------|--------------|-----------|--------------|--------------|--------------|--------------|
| 22868 | 6.972071229  | 5.5398727 | 6.255971957  | 4.424398591  | 2.212230095  | 3.318314343  |
| 22870 | 8.29082699   | 6.8469571 | 5.403087204  | 6.51496239   | 8.246536643  | 4.783388138  |
| 22872 | 3.187894448  | 5.1522471 | 7.116599779  | 10.13933326  | 6.567704622  | 8.353518943  |
| 22873 | 1.539693917  | 3.2452353 | 4.950776693  | 2.334436445  | 3.379562464  | 1.289310425  |
| 22874 | -0.352108471 | -0.352108 | -0.352108471 | 3.682181533  | 3.563511762  | 3.800851305  |
| 22876 | 2.681724436  | 1.0692497 | 4.294199159  | -0.352108471 | -0.352108471 | -0.352108471 |
| 22877 | 5.908221573  | 5.5882244 | 6.228218771  | 6.442231866  | 6.246629235  | 6.637834496  |
| 22883 | 1.695655193  | 2.4349289 | 2.065292044  | 7.478001079  | 10.29955492  | 8.888778001  |
| 22884 | -0.352108471 | -0.352108 | -0.352108471 | 6.344326921  | 5.458255064  | 4.572183207  |
| 22885 | 5.493783215  | 5.5293114 | 5.458255064  | 6.713776402  | 6.729085562  | 6.698467242  |
| 22887 | 10.41246047  | 7.3781729 | 4.343885236  | 6.668865983  | 5.449706766  | 7.888025199  |
| 22888 | 6.570764467  | 6.6691367 | 6.767508926  | 6.440256725  | 6.373952196  | 6.307647666  |
| 22889 | -0.352108471 | -0.352108 | -0.352108471 | 5.20089139   | 5.254689875  | 5.147092904  |
| 22890 | 5.354685649  | 5.3835036 | 5.325867653  | 6.396868383  | 6.410585269  | 6.383151496  |
| 22894 | 5.499603697  | 3.1740837 | 4.336843676  | 5.820435134  | 6.309958134  | 6.065196634  |
| 22897 | 5.354685649  | 6.0955569 | 4.613814437  | -0.352108471 | -0.352108471 | -0.352108471 |
| 22900 | 5.626802631  | 5.4423851 | 5.81122012   | 1.76984594   | 1.731739118  | 1.807952763  |
| 22904 | 2.553073296  | 0.2069451 | 4.899201485  | 5.29818808   | 6.056053999  | 6.813919918  |
| 22906 | 5.637563121  | 6.7052875 | 7.773011902  | 4.272763834  | 8.119995301  | 6.196379568  |
| 22907 | -0.352108471 | -0.352108 | -0.352108471 | 3.906425881  | 3.727916258  | 3.549406635  |
| 22911 | 6.801813774  | 6.8648849 | 6.738742641  | -0.352108471 | -0.352108471 | -0.352108471 |
| 22913 | 7.622518643  | 5.8179612 | 9.427076069  | 7.827924462  | 7.846725922  | 7.865527382  |
| 22915 | 4.901506784  | 5.2437595 | 4.559254036  | 6.31523113   | 6.31523113   | 6.31523113   |
| 22919 | 6.962610801  | 7.9989043 | 9.035197794  | 8.267255306  | 7.223970505  | 9.310540107  |
| 22924 | 6.490304795  | 1.5874548 | 4.038879774  | 6.266367194  | 5.334256671  | 7.198477716  |
| 22925 | -0.352108471 | -0.352108 | -0.352108471 | 4.741335279  | 5.516191992  | 5.128763636  |
| 22926 | 6.305519736  | 6.2558778 | 6.355161685  | 5.747617149  | 5.421579811  | 6.073654487  |
| 22930 | -0.352108471 | -0.352108 | -0.352108471 | 6.377287067  | 6.032025449  | 6.204656258  |
| 22931 | -0.352108471 | -0.352108 | -0.352108471 | 2.274515706  | -0.352108471 | 4.901139884  |
| 22933 | 3.127737875  | 3.136327  | 3.119148782  | 5.760537073  | 5.775231583  | 5.745842563  |
| 22936 | 5.061176021  | 7.8054614 | 6.433318728  | 6.532441983  | 6.549852913  | 6.515031054  |
| 22937 | -0.352108471 | -0.352108 | -0.352108471 | 5.128763636  | 7.00964221   | 3.247885062  |
| 22938 | 7.259341956  | 7.2774479 | 7.241236027  | 6.022050925  | 6.038453511  | 6.005648339  |
| 22943 | 7.787414058  | 8.1860488 | 7.986731438  | 10.50543536  | 7.587817397  | 9.046626379  |
| 22944 | 4.658482176  | 5.6736962 | 6.688910282  | 3.715877345  | 4.8336904    | 4.274783872  |
| 22948 | 8.663537     | 8.6927236 | 8.634350444  | 8.481446383  | 8.489801751  | 8.473091016  |
| 22949 | 3.415477276  | 5.4500085 | 7.484539702  | -0.352108471 | -0.352108471 | -0.352108471 |
| 22955 | -0.352108471 | -0.352108 | -0.352108471 | 8.423147771  | 3.023823261  | 5.723485516  |
| 22974 | 2.65059567   | 1.8977565 | 3.403434816  | 8.695100112  | 7.273767717  | 5.852435321  |
| 22978 | 4.617382386  | 5.3152588 | 3.919505936  | 7.918642203  | 7.927022814  | 7.910261593  |
| 22980 | 8.057301306  | 6.8610575 | 5.664813682  | 6.952707338  | 5.251385446  | 8.65402923   |
| 22981 | 5.852937462  | 5.9030349 | 5.802839999  | -0.352108471 | -0.352108471 | -0.352108471 |
| 22982 | 6.901979267  | 6.9037827 | 6.900175883  | -0.352108471 | -0.352108471 | -0.352108471 |
| 22983 | 6.920328612  | 5.1917794 | 6.056053999  | 0.044132154  | -0.352108471 | 0.440372779  |
| 22984 | -0.352108471 | -0.352108 | -0.352108471 | 6.74407332   | 5.258887764  | 8.229258876  |
| 22985 | 3.127737875  | 2.7683414 | 3.487134364  | 6.693937107  | 8.074926929  | 5.312947285  |
| 22987 | 4.871233248  | 4.617923  | 5.124543452  | 4.00104605   | 5.315258837  | 2.686833264  |

|       |              |           |              |              |              |              |
|-------|--------------|-----------|--------------|--------------|--------------|--------------|
| 22990 | -0.352108471 | -0.352108 | -0.352108471 | 6.022050925  | 6.038453511  | 6.005648339  |
| 22992 | -0.352108471 | -0.352108 | -0.352108471 | 5.923493182  | 6.436231581  | 5.410754783  |
| 22997 | 4.784443809  | 5.0755196 | 5.366595308  | -0.352108471 | -0.352108471 | -0.352108471 |
| 23002 | 3.202588505  | 1.7605619 | 2.481575183  | -0.352108471 | -0.352108471 | -0.352108471 |
| 23005 | 8.40798568   | 3.2784882 | 5.843236918  | 0.875857225  | 2.276479193  | 3.67710116   |
| 23008 | -0.352108471 | -0.352108 | -0.352108471 | 6.422125394  | 5.325716078  | 4.229306762  |
| 23011 | 7.620813645  | 6.264091  | 8.977536258  | 7.306531223  | 7.21486974   | 7.398192705  |
| 23013 | 6.396868383  | 8.6656367 | 4.128100051  | 7.738656439  | 6.235921161  | 4.733185883  |
| 23014 | -0.352108471 | -0.352108 | -0.352108471 | 4.80208491   | 7.154500842  | 2.449668978  |
| 23017 | 6.444344941  | 8.3302157 | 7.387280312  | -0.352108471 | -0.352108471 | -0.352108471 |
| 23020 | 5.748554906  | 3.1277379 | 0.506920845  | 6.956278745  | 6.83357915   | 7.078978339  |
| 23022 | 5.661877241  | 4.2321371 | 4.947007189  | 7.575129529  | 9.397748895  | 5.752510164  |
| 23024 | -0.352108471 | -0.352108 | -0.352108471 | 4.66005769   | 4.688318557  | 4.631796822  |
| 23028 | 6.621375333  | 7.3143303 | 8.007285247  | 6.396868383  | 4.325965404  | 8.467771361  |
| 23030 | 3.510791208  | 7.2358917 | 10.96099212  | 6.261817617  | 6.479200813  | 6.044434421  |
| 23031 | 5.454270861  | 4.7989575 | 4.143644102  | 6.721060945  | 6.803648407  | 6.762354676  |
| 23032 | 10.53707414  | 5.5994466 | 8.068260349  | 6.420072833  | 7.981021082  | 4.859124585  |
| 23034 | -0.352108471 | -0.352108 | -0.352108471 | 5.851704574  | 6.151913688  | 6.001809131  |
| 23035 | -0.352108471 | -0.352108 | -0.352108471 | 2.515697587  | 5.383503645  | -0.352108471 |
| 23036 | 5.769132707  | 8.2644201 | 7.016776417  | 4.297639083  | 4.482692559  | 4.112585606  |
| 23037 | 6.515350569  | 7.1472278 | 6.831289207  | -0.352108471 | -0.352108471 | -0.352108471 |
| 23038 | 6.144738623  | 7.2078382 | 8.2709377    | 4.927679215  | 6.266163582  | 3.589194848  |
| 23039 | 6.129154436  | 7.2191033 | 6.674128879  | 7.962914419  | 4.965345804  | 1.967777189  |
| 23041 | 6.441863207  | 8.1717493 | 4.711977071  | -0.352108471 | -0.352108471 | -0.352108471 |
| 23042 | 4.684878868  | 3.9090457 | 5.460712065  | 1.935130509  | 2.274515706  | 2.613900903  |
| 23046 | 2.201036472  | -0.352108 | 4.754181416  | -0.352108471 | -0.352108471 | -0.352108471 |
| 23048 | 6.114636752  | 5.0894122 | 4.064187652  | 3.725166081  | 2.420433935  | 5.029898226  |
| 23049 | 8.033846106  | 7.511077  | 8.556615201  | 7.284298749  | 6.926801914  | 7.641795584  |
| 23051 | 8.098323384  | 6.2634999 | 7.180911636  | 5.934798323  | 4.482946372  | 7.386650274  |
| 23053 | -0.352108471 | -0.352108 | -0.352108471 | 5.375686461  | 6.202145189  | 7.028603916  |
| 23054 | 4.990673431  | 5.3257161 | 5.660758725  | -0.352108471 | -0.352108471 | -0.352108471 |
| 23059 | 7.362898191  | 7.1903972 | 7.535399176  | 6.452415203  | 7.291996879  | 5.612833527  |
| 23061 | 7.4755167    | 4.2303582 | 5.852937462  | 6.995370627  | 5.655249734  | 6.32531018   |
| 23062 | 8.077501205  | 7.5271777 | 6.976854187  | 3.723847293  | 2.686833264  | 4.760861323  |
| 23064 | 5.156223819  | 4.8780491 | 5.017136436  | -0.352108471 | -0.352108471 | -0.352108471 |
| 23065 | 4.341685584  | 6.6400194 | 8.938353202  | -0.352108471 | -0.352108471 | -0.352108471 |
| 23067 | -0.352108471 | -0.352108 | -0.352108471 | 5.945877642  | 5.637296679  | 5.328715715  |
| 23070 | -0.352108471 | -0.352108 | -0.352108471 | 4.927679215  | 5.162677265  | 4.692681165  |
| 23071 | -0.352108471 | -0.352108 | -0.352108471 | 6.682822443  | 6.698467242  | 6.667177643  |
| 23075 | 5.884825072  | 9.4534818 | 2.316168355  | 4.575701584  | 8.40294373   | 6.489322657  |
| 23076 | 6.735779686  | 6.7508628 | 6.720696571  | -0.352108471 | -0.352108471 | -0.352108471 |
| 23080 | 7.044142848  | 7.1881098 | 6.900175883  | 0.849500091  | -0.352108471 | 2.051108653  |
| 23081 | 6.449754253  | 6.4168832 | 6.433318728  | 5.457401074  | 4.576871797  | 5.017136436  |
| 23085 | 4.590734517  | 3.3976438 | 2.204553096  | 4.493074164  | 6.915596346  | 5.704335255  |
| 23086 | 9.36812472   | 9.3688497 | 9.369574686  | 8.149457474  | 7.996298794  | 8.302616153  |
| 23087 | -0.352108471 | -0.352108 | -0.352108471 | 4.80208491   | 3.385507109  | 6.218662712  |
| 23091 | 4.178899946  | 3.7191088 | 4.638691089  | 6.022050925  | 4.612133582  | 7.431968268  |

|       |              |           |              |              |              |              |
|-------|--------------|-----------|--------------|--------------|--------------|--------------|
| 23092 | 5.816819807  | 9.7696384 | 7.793229106  | 6.730179436  | 6.844515667  | 6.958851898  |
| 23093 | -0.352108471 | -0.352108 | -0.352108471 | 4.927679215  | 4.954218546  | 4.901139884  |
| 23094 | -0.352108471 | -0.352108 | -0.352108471 | 1.842407068  | 1.807952763  | 1.876861374  |
| 23095 | 7.676556837  | 6.0206564 | 4.364755958  | 6.768161686  | 8.267506524  | 7.517834105  |
| 23096 | -0.352108471 | -0.352108 | -0.352108471 | 2.076022254  | 2.100935855  | 2.051108653  |
| 23099 | 6.699669623  | 7.0441776 | 6.355161685  | 6.191192686  | 5.653299811  | 6.729085562  |
| 23102 | -0.352108471 | -0.352108 | -0.352108471 | 8.138734114  | 6.481523945  | 4.824313775  |
| 23105 | 6.537383725  | 5.4646719 | 7.610095507  | -0.352108471 | -0.352108471 | -0.352108471 |
| 23107 | 5.346983862  | 5.3551833 | 5.363382639  | 4.312928258  | 4.930625625  | 4.621776941  |
| 23112 | 4.439235342  | 5.597852  | 6.756468726  | 8.328883636  | 6.461840164  | 4.594796692  |
| 23113 | 6.637046067  | 7.7648689 | 5.509223186  | -0.352108471 | -0.352108471 | -0.352108471 |
| 23119 | 6.1067292    | 5.7049355 | 5.303141868  | -0.352108471 | -0.352108471 | -0.352108471 |
| 23120 | 6.15154247   | 6.9134889 | 7.675435326  | -0.352108471 | -0.352108471 | -0.352108471 |
| 23125 | -0.352108471 | -0.352108 | -0.352108471 | 9.735552686  | 3.209800195  | 6.47267644   |
| 23126 | 6.178645924  | 5.4217537 | 5.800199788  | 2.301055037  | 3.89409388   | 0.708016195  |
| 23129 | 4.867589503  | 4.7140092 | 4.560428825  | 0.379002596  | 6.243388056  | 3.311195326  |
| 23131 | 2.659511827  | 3.5959639 | 3.127737875  | 8.082343149  | 7.209478834  | 6.336614519  |
| 23132 | 0.709954536  | 3.3238738 | 2.016914154  | 8.492224117  | 2.862255241  | 5.677239679  |
| 23135 | -0.352108471 | -0.352108 | -0.352108471 | 6.022050925  | 4.149359872  | 7.894741978  |
| 23137 | 4.137290146  | 5.2492247 | 6.361159261  | 6.758889758  | 6.71093492   | 6.662980082  |
| 23138 | 5.614838129  | 4.7841331 | 6.445543199  | -0.352108471 | -0.352108471 | -0.352108471 |
| 23139 | 5.677560781  | 8.4968049 | 7.08718283   | 2.176699173  | 2.021948617  | 2.099323895  |
| 23140 | 6.521624659  | 4.7286969 | 5.625160771  | 6.149337851  | 6.686595003  | 5.612080698  |
| 23144 | 5.55876787   | 7.339779  | 3.777756753  | 6.369156591  | 7.993983431  | 4.74432975   |
| 23145 | 5.284974356  | 4.8994396 | 5.670509125  | 4.328694932  | 7.536005664  | 5.932350298  |
| 23148 | 11.18910833  | 1.9588297 | 6.573968999  | 5.812004781  | 8.391327579  | 7.10166618   |
| 23150 | -0.352108471 | -0.352108 | -0.352108471 | 4.079365824  | 2.694427604  | 1.309489384  |
| 23152 | 8.386872366  | 7.1377274 | 5.888582458  | 6.053934119  | 5.139899864  | 5.596916991  |
| 23155 | 6.878890016  | 6.4712501 | 6.06361009   | 3.172580615  | 3.444533984  | 2.900627247  |
| 23158 | 5.903499469  | 5.4937832 | 5.084066961  | 5.903760504  | 8.957594003  | 2.849927005  |
| 23160 | 1.383520155  | -0.352108 | 3.119148782  | 6.128525768  | 7.054600764  | 7.980675761  |
| 23161 | -0.352108471 | -0.352108 | -0.352108471 | 6.113115027  | 7.003139405  | 5.223090649  |
| 23162 | 5.376287016  | 4.3810439 | 4.878665478  | 1.223721097  | 1.305230684  | 1.14221151   |
| 23163 | 3.83572752   | 4.5503078 | 5.264888084  | 6.311056085  | 5.821410838  | 5.33176559   |
| 23164 | 7.378762478  | 7.9301228 | 7.654442651  | 8.07411195   | 8.355515917  | 8.636919885  |
| 23166 | -0.352108471 | -0.352108 | -0.352108471 | 1.631676003  | 3.615460478  | -0.352108471 |
| 23167 | -0.352108471 | -0.352108 | -0.352108471 | 5.88700099   | 3.227651827  | 8.546350153  |
| 23168 | 5.745394463  | 5.7155573 | 5.775231583  | 4.580195866  | 5.605609608  | 3.554782125  |
| 23170 | 6.87100449   | 6.521105  | 7.220903987  | -0.352108471 | -0.352108471 | -0.352108471 |
| 23171 | -0.352108471 | -0.352108 | -0.352108471 | 3.235355345  | 2.211943219  | 1.188531093  |
| 23173 | 7.346824737  | 4.5315597 | 5.939192221  | -0.352108471 | -0.352108471 | -0.352108471 |
| 23175 | 1.383520155  | -0.352108 | 3.119148782  | 6.32531018   | 6.33538923   | 6.31523113   |
| 23176 | -0.352108471 | -0.352108 | -0.352108471 | 4.943286     | 6.813211995  | 5.878248998  |
| 23177 | 8.300766402  | 8.4746689 | 8.648571346  | 5.233567424  | 3.897234107  | 6.56990074   |
| 23178 | -0.352108471 | -0.352108 | -0.352108471 | 2.002763867  | 1.997577452  | 1.992391037  |
| 23180 | 9.013050438  | 7.3139841 | 5.614917825  | -0.352108471 | -0.352108471 | -0.352108471 |
| 23181 | 1.383520155  | -0.352108 | 3.119148782  | 3.245625856  | 3.337746555  | 3.153505157  |

|       |              |           |              |              |              |              |
|-------|--------------|-----------|--------------|--------------|--------------|--------------|
| 23184 | -0.352108471 | -0.352108 | -0.352108471 | 4.456886199  | 4.482692559  | 4.43107984   |
| 23185 | 4.944495873  | 6.4327494 | 5.688622647  | 4.967642314  | 7.149216888  | 9.330791462  |
| 23186 | -0.352108471 | -0.352108 | -0.352108471 | 6.165870606  | 5.76850177   | 6.563239442  |
| 23187 | -0.352108471 | -0.352108 | -0.352108471 | 4.667242547  | 6.926938623  | 9.186634699  |
| 23190 | -0.352108471 | -0.352108 | -0.352108471 | 6.296043865  | 4.939040992  | 7.653046739  |
| 23191 | -0.352108471 | -0.352108 | -0.352108471 | 6.878850027  | 6.729085562  | 7.028614492  |
| 23193 | 5.846368804  | 7.8162096 | 6.831289207  | 7.463736672  | 5.220915492  | 9.706557853  |
| 23195 | 5.740399084  | 6.7052875 | 7.67017594   | 3.818060928  | 5.383503645  | 2.252618212  |
| 23196 | -0.352108471 | -0.352108 | -0.352108471 | 7.329088911  | 5.959950203  | 8.698227619  |
| 23197 | -0.352108471 | -0.352108 | -0.352108471 | 3.210996379  | 4.178899946  | 5.146803513  |
| 23199 | -0.352108471 | -0.352108 | -0.352108471 | 7.044177561  | 7.802689174  | 6.285665948  |
| 23203 | -0.352108471 | -0.352108 | -0.352108471 | 6.609543024  | 7.964843359  | 5.254242688  |
| 23204 | 2.977960136  | 3.8056644 | 4.63336857   | 9.522895775  | 3.84274911   | 6.682822443  |
| 23207 | 7.305341479  | 7.3178812 | 7.292801747  | 6.826859584  | 7.528959936  | 8.231060288  |
| 23208 | 1.66985715   | -0.352108 | 3.69182277   | 8.994503386  | 4.395178474  | 6.69484093   |
| 23210 | -0.352108471 | -0.352108 | -0.352108471 | 7.186511196  | 7.204087928  | 7.168934463  |
| 23211 | 6.332466669  | 7.661227  | 5.003706387  | 6.12990004   | 6.964019301  | 5.29578078   |
| 23213 | 8.190131516  | 7.0940219 | 9.286241145  | 7.885401903  | 8.509613549  | 9.133825194  |
| 23214 | 3.286524408  | 5.5587679 | 7.831011332  | 6.927461799  | 7.856668635  | 7.392065217  |
| 23215 | 4.247086177  | 6.3324667 | 8.41784716   | -0.352108471 | -0.352108471 | -0.352108471 |
| 23216 | 6.85672293   | 5.3863346 | 6.121528769  | 4.237354153  | 5.859617369  | 7.481880585  |
| 23220 | -0.352108471 | -0.352108 | -0.352108471 | 1.946552907  | 0.268308258  | 3.624797556  |
| 23223 | 2.740210233  | -0.352108 | 5.832528937  | -0.352108471 | -0.352108471 | -0.352108471 |
| 23224 | 5.90029238   | 6.272065  | 5.528519803  | -0.352108471 | -0.352108471 | -0.352108471 |
| 23225 | 5.753125775  | 6.7645426 | 6.258834195  | -0.352108471 | -0.352108471 | -0.352108471 |
| 23232 | 3.188365197  | 8.9932515 | 6.090808341  | -0.352108471 | -0.352108471 | -0.352108471 |
| 23233 | -0.352108471 | -0.352108 | -0.352108471 | 5.043435488  | 7.288305724  | 6.165870606  |
| 23234 | 7.633287415  | 5.5146506 | 6.573968999  | 4.400642798  | 7.120431348  | 5.760537073  |
| 23239 | 5.506125303  | 5.8124324 | 5.659278871  | -0.352108471 | -0.352108471 | -0.352108471 |
| 23240 | 7.202880948  | 7.1358739 | 7.269888009  | 9.1428279    | 6.288499729  | 3.434171559  |
| 23241 | 7.841606393  | 6.9795601 | 6.117513834  | 8.175956815  | 7.50587715   | 6.835797485  |
| 23242 | -0.352108471 | -0.352108 | -0.352108471 | 4.857539934  | 4.49146636   | 5.223613509  |
| 23244 | 5.260515072  | 6.6235409 | 7.986566794  | -0.352108471 | -0.352108471 | -0.352108471 |
| 23245 | 11.63330029  | 11.222625 | 12.04397532  | 9.950532901  | 10.71396365  | 11.4773944   |
| 23246 | 6.573968999  | 7.4862118 | 5.6617262    | 1.90830372   | 1.939746065  | 1.876861374  |
| 23248 | 4.220535928  | 5.8476283 | 7.474720713  | 1.703584312  | 0.743857882  | 1.223721097  |
| 23251 | 5.852937462  | 5.1208337 | 6.58504124   | -0.352108471 | -0.352108471 | -0.352108471 |
| 23254 | -0.352108471 | -0.352108 | -0.352108471 | 2.065292044  | 3.449619376  | 0.680964713  |
| 23255 | -0.352108471 | -0.352108 | -0.352108471 | 7.498611778  | 4.391025634  | 5.944818706  |
| 23256 | 5.428393874  | 4.7624113 | 6.09437648   | 8.156749636  | 7.357359337  | 6.557969039  |
| 23258 | 5.97539282   | 6.6315297 | 6.303461245  | -0.352108471 | -0.352108471 | -0.352108471 |
| 23263 | -0.352108471 | -0.352108 | -0.352108471 | 6.266367194  | 8.502791965  | 4.029942422  |
| 23264 | -0.352108471 | -0.352108 | -0.352108471 | 7.949797171  | 9.282264384  | 6.617329957  |
| 23265 | -0.352108471 | -0.352108 | -0.352108471 | 5.760537073  | 8.307561902  | 3.213512244  |
| 23268 | -0.352108471 | -0.352108 | -0.352108471 | 5.983736712  | 4.952037565  | 7.015435859  |
| 23270 | -0.352108471 | -0.352108 | -0.352108471 | 6.450302837  | 5.927150083  | 6.973455592  |
| 23271 | -0.352108471 | -0.352108 | -0.352108471 | 1.946552907  | 4.245214285  | -0.352108471 |

|       |              |           |              |              |              |              |
|-------|--------------|-----------|--------------|--------------|--------------|--------------|
| 23272 | 7.368929106  | 7.0737094 | 6.778489705  | 7.069096541  | 5.715557343  | 4.362018146  |
| 23275 | -0.352108471 | -0.352108 | -0.352108471 | 5.936972408  | 5.017136436  | 4.097300463  |
| 23276 | -0.352108471 | -0.352108 | -0.352108471 | 5.958359385  | 5.958359385  | 5.958359385  |
| 23277 | 6.846957097  | 8.5599964 | 5.13391777   | 4.161895069  | 5.529311366  | 6.896727662  |
| 23283 | -0.352108471 | -0.352108 | -0.352108471 | 3.492690609  | 4.865109282  | 4.178899946  |
| 23284 | -0.352108471 | -0.352108 | -0.352108471 | 6.128312408  | 4.904478682  | 3.680644956  |
| 23288 | 7.375407987  | 7.904095  | 8.432781997  | -0.352108471 | -0.352108471 | -0.352108471 |
| 23291 | -0.352108471 | -0.352108 | -0.352108471 | 5.686745699  | 4.651569952  | 5.169157826  |
| 23293 | 7.757296035  | 9.8233685 | 5.691223527  | 5.410222762  | 7.654233331  | 6.532228046  |
| 23295 | 2.66769987   | 7.7721024 | 5.219901144  | 4.72458994   | 5.58495468   | 3.8642252    |
| 23299 | -0.352108471 | -0.352108 | -0.352108471 | 4.892537618  | 5.859617369  | 6.82669712   |
| 23300 | -0.352108471 | -0.352108 | -0.352108471 | 5.914934646  | 5.073899708  | 5.494417177  |
| 23301 | -0.352108471 | -0.352108 | -0.352108471 | 5.369332089  | 5.100443381  | 5.638220796  |
| 23303 | -0.352108471 | -0.352108 | -0.352108471 | 5.095423988  | 5.124543452  | 5.066304524  |
| 23304 | 5.749402114  | 2.6565569 | 8.84224728   | 2.947695678  | 10.33657302  | 6.64213435   |
| 23305 | 7.987390912  | 8.6668076 | 7.307974228  | 6.392464334  | 5.962319293  | 5.532174252  |
| 23306 | 2.65059567   | 5.6532998 | -0.352108471 | -0.352108471 | -0.352108471 | -0.352108471 |
| 23307 | 6.502263028  | 4.7891524 | 8.215373684  | -0.352108471 | -0.352108471 | -0.352108471 |
| 23309 | -0.352108471 | -0.352108 | -0.352108471 | 3.447274322  | 3.585121301  | 3.722968281  |
| 23310 | 5.861579664  | 5.5293114 | 6.193847962  | -0.352108471 | -0.352108471 | -0.352108471 |
| 23313 | 6.189714237  | 5.5259162 | 4.862118258  | 4.9405116    | 6.811810265  | 8.683108931  |
| 23315 | 6.167966808  | 6.5187174 | 5.817216208  | 7.949451176  | 6.104429468  | 4.25940776   |
| 23317 | 8.12788013   | 7.4432023 | 8.812557987  | -0.352108471 | -0.352108471 | -0.352108471 |
| 23321 | 6.404970197  | 5.9984064 | 5.591842699  | -0.352108471 | -0.352108471 | -0.352108471 |
| 23324 | -0.352108471 | -0.352108 | -0.352108471 | 7.753529229  | 9.324769412  | 6.182289045  |
| 23326 | 6.927337071  | 4.5195292 | 9.335144928  | 7.824184932  | 7.948836079  | 7.886510506  |
| 23327 | 3.534670788  | 5.2655441 | 6.996417412  | 7.572971681  | 3.359882049  | 5.466426865  |
| 23328 | 6.886324359  | 7.1464808 | 6.626167961  | 3.470468384  | 4.688318557  | 2.252618212  |
| 23331 | 8.346425764  | 5.2218548 | 6.784140258  | 1.493791735  | 1.437859363  | 1.549724107  |
| 23332 | 2.8251001    | -0.352108 | 6.002308672  | -0.352108471 | -0.352108471 | -0.352108471 |
| 23333 | -0.352108471 | -0.352108 | -0.352108471 | 6.280785144  | 7.7016594    | 6.991222272  |
| 23334 | 7.042510888  | 7.9376183 | 7.490064594  | 1.967011497  | 4.20202554   | 6.437039583  |
| 23338 | -0.352108471 | -0.352108 | -0.352108471 | 6.204656258  | 5.770235089  | 6.639077427  |
| 23339 | -0.352108471 | -0.352108 | -0.352108471 | 3.485299609  | 8.6899893    | 6.087644454  |
| 23344 | 7.398193617  | 5.2796653 | 9.516721893  | 0.882835079  | 1.689109503  | 2.495383927  |
| 23348 | 7.764477324  | 5.3102901 | 6.537383725  | 3.20802376   | 8.83607809   | 6.022050925  |
| 23349 | -0.352108471 | -0.352108 | -0.352108471 | 6.220238598  | 4.582161095  | 7.858316102  |
| 23350 | -0.352108471 | -0.352108 | -0.352108471 | 6.136859819  | 6.497182024  | 6.857504229  |
| 23351 | 6.609550563  | 6.056054  | 5.502557435  | -0.352108471 | -0.352108471 | -0.352108471 |
| 23352 | 2.588601447  | -0.352108 | 5.529311366  | -0.352108471 | -0.352108471 | -0.352108471 |
| 23360 | -0.352108471 | -0.352108 | -0.352108471 | 4.096638726  | 5.596916991  | 7.097195256  |
| 23363 | -0.352108471 | -0.352108 | -0.352108471 | 7.358324194  | 7.885711656  | 7.622017925  |
| 23365 | 7.101491044  | 6.430493  | 7.772489067  | 6.886610445  | 6.900175883  | 6.873045007  |
| 23367 | -0.352108471 | -0.352108 | -0.352108471 | 7.591455381  | 10.81107722  | 4.371833546  |
| 23369 | 5.089412202  | 5.1245435 | 5.054280952  | 6.434644758  | 6.448016836  | 6.421272681  |
| 23370 | 4.680024204  | 7.5615971 | 6.120810648  | -0.352108471 | -0.352108471 | -0.352108471 |
| 23371 | -0.352108471 | -0.352108 | -0.352108471 | 4.498245804  | 7.641842129  | 6.070043966  |

|       |              |           |              |              |              |              |
|-------|--------------|-----------|--------------|--------------|--------------|--------------|
| 23373 | -0.352108471 | -0.352108 | -0.352108471 | 0.881271924  | 1.848794271  | 2.816316617  |
| 23379 | 5.939192221  | 5.9583594 | 5.920025058  | -0.352108471 | -0.352108471 | -0.352108471 |
| 23380 | -0.352108471 | -0.352108 | -0.352108471 | 5.704335255  | 5.715557343  | 5.693113166  |
| 23381 | 5.694288095  | 5.463922  | 5.233555955  | -0.352108471 | -0.352108471 | -0.352108471 |
| 23383 | 5.919602486  | 6.3691566 | 6.818710695  | 3.119148782  | 1.001288989  | 5.237008574  |
| 23384 | -0.352108471 | -0.352108 | -0.352108471 | 6.456300849  | 5.803499231  | 6.12990004   |
| 23385 | -0.352108471 | -0.352108 | -0.352108471 | 7.237322918  | 7.661684316  | 6.81296152   |
| 23386 | 5.776028412  | 6.6895379 | 7.603047463  | -0.352108471 | -0.352108471 | -0.352108471 |
| 23392 | 6.706547766  | 6.056054  | 5.405560232  | 3.325116882  | 6.530241548  | 4.927679215  |
| 23394 | 6.071632948  | 6.075676  | 6.073654487  | 0.044132154  | 0.440372779  | -0.352108471 |
| 23395 | 6.502263028  | 6.5150311 | 6.489495002  | 1.493791735  | 1.549724107  | 1.437859363  |
| 23396 | -0.352108471 | -0.352108 | -0.352108471 | 5.960229497  | 3.154259885  | 4.557244691  |
| 23399 | 4.966655053  | 5.8529375 | 6.739219871  | 8.199266326  | 9.55849577   | 6.840036882  |
| 23400 | -0.352108471 | -0.352108 | -0.352108471 | 6.835443563  | 6.747271561  | 6.659099559  |
| 23403 | 7.063413806  | 5.1342152 | 8.992612367  | -0.352108471 | -0.352108471 | -0.352108471 |
| 23404 | 6.561809811  | 5.1425483 | 3.723286822  | 3.867457035  | 5.926961306  | 1.807952763  |
| 23405 | -0.352108471 | -0.352108 | -0.352108471 | 6.913488898  | 6.816764603  | 7.010213194  |
| 23406 | 8.213306202  | 5.8414453 | 7.027375773  | 9.249434818  | 7.756104605  | 10.74276503  |
| 23410 | 3.667916057  | 4.0823601 | 4.496804164  | 3.645602413  | 1.524655022  | 2.585128717  |
| 23411 | 5.428393874  | 5.4582551 | 5.398532684  | -0.352108471 | -0.352108471 | -0.352108471 |
| 23412 | -0.352108471 | -0.352108 | -0.352108471 | 1.737679284  | 7.866490536  | 4.80208491   |
| 23413 | 5.688622647  | 5.7155573 | 5.661687951  | 5.663737322  | 5.665786693  | 5.661687951  |
| 23414 | 6.433318728  | 5.2387634 | 7.627874068  | 0.044132154  | 0.440372779  | -0.352108471 |
| 23420 | -0.352108471 | -0.352108 | -0.352108471 | 2.139844176  | 4.257742579  | 0.021945772  |
| 23426 | -0.352108471 | -0.352108 | -0.352108471 | 7.535571763  | 4.724228317  | 6.12990004   |
| 23431 | 7.558979541  | 7.2513033 | 6.943627137  | 5.420703748  | 6.731862502  | 8.043021255  |
| 23432 | 5.765954776  | 2.6556616 | 8.876247922  | 3.772616852  | 6.186673578  | 4.979645215  |
| 23433 | 6.180304537  | 3.2056737 | 4.692989119  | 8.807209491  | 5.701860041  | 7.254534766  |
| 23434 | 5.391018164  | 5.3835036 | 5.398532684  | 0.793818797  | -0.352108471 | 1.939746065  |
| 23435 | 7.137727412  | 7.1464808 | 7.128974067  | -0.352108471 | -0.352108471 | -0.352108471 |
| 23439 | 7.681952154  | 6.0729503 | 6.87745121   | 5.726388281  | 6.415773968  | 5.037002593  |
| 23443 | 6.754322418  | 6.6608845 | 6.707603469  | 5.951862052  | 6.38294239   | 5.520781713  |
| 23446 | 2.961764703  | 8.3965748 | 5.679169776  | 5.937584898  | 6.120364579  | 5.754805217  |
| 23450 | 7.323359936  | 8.6788647 | 8.001112307  | 7.305876064  | 5.974196817  | 8.637555311  |
| 23452 | 2.685732087  | -0.352108 | 5.723572646  | -0.352108471 | -0.352108471 | -0.352108471 |
| 23457 | 8.079811343  | 6.6741289 | 5.268446414  | 4.375164248  | 0.676269646  | 2.525716947  |
| 23461 | 3.519327359  | 3.9195059 | 3.119148782  | 1.688802714  | 1.939746065  | 1.437859363  |
| 23463 | 7.416889498  | 10.319741 | 4.514038468  | 6.345275458  | 4.213456757  | 8.477094158  |
| 23464 | -0.352108471 | -0.352108 | -0.352108471 | 5.578154865  | 5.233567424  | 4.888979982  |
| 23468 | 9.804049994  | 6.5048286 | 8.154439274  | 10.02262407  | 8.523925919  | 7.025227772  |
| 23469 | -0.352108471 | -0.352108 | -0.352108471 | 6.48390551   | 6.32531018   | 6.166714851  |
| 23471 | 3.127737875  | 8.0241507 | -1.768674914 | 5.923493182  | 2.28624554   | 9.560740824  |
| 23474 | -0.352108471 | -0.352108 | -0.352108471 | 5.99704135   | 7.300476197  | 8.603911043  |
| 23475 | 6.234938986  | 9.4952417 | 2.974636318  | 1.454895716  | 2.100935855  | 0.808855576  |
| 23476 | 3.127737875  | 2.908022  | 3.347453733  | 5.429934077  | 6.676169033  | 7.922403988  |
| 23478 | 5.471966574  | 6.1215288 | 6.771090964  | 6.804723141  | 6.058864621  | 7.550581661  |
| 23479 | -0.352108471 | -0.352108 | -0.352108471 | 5.155162759  | 8.808614795  | 6.981888777  |



|       |              |           |              |              |              |              |
|-------|--------------|-----------|--------------|--------------|--------------|--------------|
| 23480 | 6.449513142  | 7.8259417 | 7.137727412  | 3.475855724  | 9.361152706  | 6.418504215  |
| 23481 | 6.257046343  | 7.1122979 | 5.401794829  | 6.682822443  | 8.181804947  | 5.183839938  |
| 23483 | 7.451958417  | 3.9702313 | 5.711094862  | 0.228373553  | 0.808855576  | -0.352108471 |
| 23491 | 8.925671182  | 9.4156787 | 9.170674948  | 8.092333076  | 9.213783115  | 6.970883038  |
| 23492 | -0.352108471 | -0.352108 | -0.352108471 | 7.532004806  | 6.12990004   | 4.727795275  |
| 23495 | 8.521120071  | 6.3968684 | 4.272616694  | -0.352108471 | -0.352108471 | -0.352108471 |
| 23499 | -0.352108471 | -0.352108 | -0.352108471 | 8.202448598  | 5.169157826  | 2.135867053  |
| 23503 | 5.960709576  | 6.8678067 | 6.414258136  | -0.352108471 | -0.352108471 | -0.352108471 |
| 23505 | 6.396868383  | 8.4438433 | 4.349893457  | 7.081809584  | 7.275234691  | 7.178522138  |
| 23507 | 5.394392653  | 4.5275136 | 6.261271753  | -1.118602831 | 1.427477396  | 3.973557622  |
| 23509 | -0.352108471 | -0.352108 | -0.352108471 | 5.998406448  | 7.18160554   | 4.815207355  |
| 23511 | 5.836219855  | 6.5344823 | 7.232744718  | -0.352108471 | -0.352108471 | -0.352108471 |
| 23513 | -0.352108471 | -0.352108 | -0.352108471 | 6.53389913   | 7.835921017  | 5.231877244  |
| 23516 | -0.352108471 | -0.352108 | -0.352108471 | 5.604153369  | 6.57113554   | 6.087644454  |
| 23518 | 8.263231782  | 6.0923221 | 7.17777694   | 5.578889148  | 6.165870606  | 6.752852064  |
| 23521 | 8.877460729  | 7.4243668 | 10.33055465  | 6.8277183    | 11.80598196  | 9.316850133  |
| 23522 | 5.852937462  | 5.873346  | 5.832528937  | -0.352108471 | -0.352108471 | -0.352108471 |
| 23523 | 6.317834233  | 6.3439771 | 6.291691359  | -0.352108471 | -0.352108471 | -0.352108471 |
| 23524 | 4.681125638  | 6.7557939 | 5.718459767  | 7.985216799  | 9.316830007  | 6.653603591  |
| 23526 | 8.047456911  | 9.0493743 | 7.045539486  | 3.632640725  | 2.123223749  | 5.142057702  |
| 23527 | 2.86736051   | 3.2452353 | 3.6231101    | 5.921336385  | 5.942660345  | 5.963984306  |
| 23528 | 5.089412202  | 4.4848553 | 5.693969148  | -0.352108471 | -0.352108471 | -0.352108471 |
| 23530 | -0.352108471 | -0.352108 | -0.352108471 | 5.233567424  | 5.254689875  | 5.212444972  |
| 23534 | -0.352108471 | -0.352108 | -0.352108471 | 7.082757193  | 9.127040761  | 5.038473626  |
| 23536 | 9.258776798  | 6.0204943 | 7.639635545  | 2.405817835  | 5.371275165  | 8.336732495  |
| 23541 | -0.352108471 | -0.352108 | -0.352108471 | 6.056053999  | 2.90283259   | 9.209275408  |
| 23543 | 9.134211828  | 6.8109783 | 7.972595042  | 6.89373565   | 7.586612656  | 7.240174153  |
| 23544 | 6.095889766  | 6.1995956 | 6.303301498  | 4.696153595  | 4.245214285  | 5.147092904  |
| 23545 | 7.676370056  | 8.0996359 | 8.522901683  | 7.526430661  | 7.320969016  | 7.115507372  |
| 23549 | -0.352108471 | -0.352108 | -0.352108471 | 4.297639083  | 4.482692559  | 4.112585606  |
| 23550 | -0.352108471 | -0.352108 | -0.352108471 | 6.476985109  | 3.990149738  | 5.233567424  |
| 23553 | -0.352108471 | -0.352108 | -0.352108471 | 1.37037826   | 3.971134403  | 2.670756332  |
| 23556 | 8.510775538  | 1.8575274 | 5.184151491  | -0.352108471 | -0.352108471 | -0.352108471 |
| 23557 | 6.339373704  | 7.1697433 | 6.754558526  | 0.874413692  | 2.100935855  | -0.352108471 |
| 23560 | -0.352108471 | -0.352108 | -0.352108471 | 6.636273252  | 4.139387601  | 9.133158902  |
| 23563 | 5.119945056  | 4.2207629 | 6.019127243  | 3.006078473  | 5.670215652  | 4.338147062  |
| 23566 | -0.352108471 | -0.352108 | -0.352108471 | 3.171900247  | 2.234223122  | 2.703061684  |
| 23567 | 5.059679236  | 4.3280654 | 3.596451515  | 1.218975116  | 1.997577452  | 0.440372779  |
| 23568 | 7.027375773  | 8.5376449 | 5.517106672  | 5.923493182  | 7.370494729  | 4.476491636  |
| 23576 | 7.923242441  | 4.2583742 | 6.090808341  | 5.776693931  | 11.20946373  | 8.493078831  |
| 23580 | -0.352108471 | -0.352108 | -0.352108471 | 5.341718312  | 5.574791816  | 5.458255064  |
| 23581 | -0.352108471 | -0.352108 | -0.352108471 | 2.966558054  | 6.888800375  | 4.927679215  |
| 23582 | 5.157883099  | 5.7632236 | 4.552542617  | 3.719973086  | 7.400204331  | 11.08043558  |
| 23585 | 6.861057494  | 8.4738527 | 5.248262329  | 7.436538706  | 5.760537073  | 4.08453544   |
| 23587 | -0.352108471 | -0.352108 | -0.352108471 | 5.872307495  | 6.285525708  | 5.459089281  |
| 23588 | -0.352108471 | -0.352108 | -0.352108471 | 3.683772944  | 6.350499927  | 5.017136436  |
| 23589 | 7.007466298  | 6.8028046 | 6.598142994  | 9.340615408  | 6.705287512  | 4.069959615  |

|       |              |           |              |              |              |              |
|-------|--------------|-----------|--------------|--------------|--------------|--------------|
| 23591 | 6.106386272  | 5.6532998 | 6.559472732  | -0.352108471 | -0.352108471 | -0.352108471 |
| 23593 | 6.402280332  | 6.8454315 | 6.623855918  | -0.352108471 | -0.352108471 | -0.352108471 |
| 23594 | 7.647264576  | 7.8693257 | 7.425203426  | 5.442235949  | 5.529311366  | 5.355160532  |
| 23596 | -0.352108471 | -0.352108 | -0.352108471 | 8.105365606  | 2.633298571  | 5.369332089  |
| 23603 | 7.070880555  | 9.5065111 | 8.288695803  | 6.141437972  | 9.950708937  | 8.046073455  |
| 23607 | 6.801813774  | 6.1490676 | 7.454559933  | -0.352108471 | -0.352108471 | -0.352108471 |
| 23608 | 2.351086241  | -0.352108 | 5.054280952  | 6.472548238  | 6.791245422  | 6.153851055  |
| 23609 | 6.713761053  | 4.6634842 | 5.688622647  | 0.440372779  | 0.440372779  | 0.440372779  |
| 23612 | 7.568346539  | 7.5334415 | 7.603251574  | 5.430898714  | 5.458255064  | 5.403542364  |
| 23616 | 5.354685649  | 5.3835036 | 5.325867653  | 5.775068216  | 5.804293869  | 5.745842563  |
| 23621 | -0.352108471 | -0.352108 | -0.352108471 | 4.178899946  | 4.245214285  | 4.112585606  |
| 23625 | -0.352108471 | -0.352108 | -0.352108471 | 5.084064216  | 2.086178387  | 3.585121301  |
| 23627 | 6.427753893  | 1.8214372 | 11.03407061  | 2.313289664  | 1.939746065  | 2.686833264  |
| 23629 | 5.980334028  | 6.4134257 | 5.547242364  | -0.352108471 | -0.352108471 | -0.352108471 |
| 23633 | 6.832222404  | 5.1097254 | 8.554719431  | 8.762526086  | 7.389152202  | 6.015778319  |
| 23636 | -0.352108471 | -0.352108 | -0.352108471 | 7.159235898  | 5.171608076  | 9.146863719  |
| 23637 | 4.945127095  | 3.0869644 | 4.016045771  | 6.417922692  | 4.320741485  | 5.369332089  |
| 23640 | -0.352108471 | -0.352108 | -0.352108471 | 4.037734573  | 4.456886199  | 4.876037826  |
| 23641 | 6.419382098  | 6.7203706 | 7.021359156  | 7.578384002  | 6.612481321  | 7.095432661  |
| 23644 | -0.352108471 | -0.352108 | -0.352108471 | 5.812438496  | 6.034547868  | 5.923493182  |
| 23645 | 4.692989119  | 5.9928175 | 3.393160694  | 8.674443538  | 7.533336972  | 6.392230407  |
| 23646 | 6.08421453   | 7.166531  | 8.248847466  | 6.61517553   | 6.505369988  | 6.724981072  |
| 23647 | 5.317115259  | 5.1539303 | 4.990745292  | 1.427477396  | 1.305230684  | 1.549724107  |
| 23648 | 4.457860241  | 6.3989275 | 5.428393874  | -0.352108471 | -0.352108471 | -0.352108471 |
| 23649 | 7.743546215  | 7.826412  | 7.660680431  | 6.136283814  | 6.497336045  | 5.775231583  |
| 23654 | 7.116455896  | 5.5876518 | 6.352053864  | 7.534433503  | 7.025721295  | 6.517009086  |
| 23659 | 5.206978924  | 5.1522471 | 5.097515302  | 4.786565833  | 6.038556342  | 5.412561087  |
| 23673 | -0.352108471 | -0.352108 | -0.352108471 | 3.919505936  | 3.919505936  | 3.919505936  |
| 23677 | 6.433318728  | 7.5991588 | 5.26747866   | 6.81196605   | 8.180153401  | 5.4437787    |
| 23678 | 3.527916452  | 4.1417014 | 2.914131516  | 1.129398324  | 1.873849414  | 2.618300505  |
| 23704 | 6.501325856  | 7.2334683 | 7.965610799  | 1.429982115  | 2.051108653  | 0.808855576  |
| 23705 | -0.352108471 | -0.352108 | -0.352108471 | 7.120853204  | 6.532441983  | 5.944030762  |
| 23710 | -0.352108471 | -0.352108 | -0.352108471 | 4.468401233  | 4.016115382  | 4.920687083  |
| 23729 | 4.396788056  | 5.8984627 | 5.147625378  | 3.172412632  | 4.430456666  | 5.688500701  |
| 23731 | 5.181747782  | 5.3835036 | 4.979991919  | 0.044132154  | -0.352108471 | 0.440372779  |
| 23741 | 7.462568767  | 8.7906046 | 8.126586667  | 7.245105036  | 7.81077061   | 8.376436184  |
| 23742 | 2.591048207  | 5.7667517 | 4.178899946  | 4.933081039  | 5.335957066  | 5.738833093  |
| 23743 | 8.277391195  | 6.4590486 | 4.640706029  | 6.105042043  | 6.847297891  | 5.362786195  |
| 23746 | 5.573740293  | 7.2360738 | 8.898407384  | 5.9257796    | 9.362656508  | 2.488902692  |
| 23753 | -0.352108471 | -0.352108 | -0.352108471 | 7.320831282  | 5.67944993   | 4.038068577  |
| 23760 | 3.039085443  | 4.6226868 | 6.206288146  | 6.022050925  | 5.437108968  | 6.606992882  |
| 23764 | 7.101764321  | 7.2616987 | 7.421632983  | 4.391914009  | 7.447005078  | 5.919459543  |
| 23765 | 7.446721128  | 6.990778  | 6.534834801  | 0.791292145  | 0.440372779  | 1.14221151   |
| 23768 | 8.093108738  | 6.991795  | 5.890481358  | -0.352108471 | -0.352108471 | -0.352108471 |
| 23770 | 7.761737527  | 8.5581857 | 8.159961629  | 9.37493894   | 8.027801809  | 8.701370375  |
| 23774 | 6.172497934  | 5.8692224 | 5.565946913  | -0.352108471 | -0.352108471 | -0.352108471 |
| 23780 | 6.508233805  | 5.7752316 | 7.241236027  | 7.002061667  | 7.044177561  | 6.959945773  |

|       |              |           |              |              |              |              |
|-------|--------------|-----------|--------------|--------------|--------------|--------------|
| 23786 | -0.352108471 | -0.352108 | -0.352108471 | 3.355836818  | 2.686833264  | 2.017829709  |
| 23787 | 6.831289207  | 6.8453896 | 6.817188811  | 7.629719548  | 7.660627648  | 7.598811448  |
| 23788 | -0.352108471 | -0.352108 | -0.352108471 | 3.919543357  | 6.705287512  | 9.491031667  |
| 24137 | 5.39299759   | 5.6886226 | 5.984247704  | 7.281950102  | 5.586223009  | 6.434086555  |
| 24138 | 5.555495184  | 6.1184215 | 5.836958364  | 4.456886199  | 4.840457771  | 4.073314628  |
| 24139 | 5.591305588  | 6.1456332 | 5.036977942  | 5.197951829  | 5.668425445  | 6.138899061  |
| 24144 | 6.059743139  | 6.67857   | 6.369156591  | 4.105278382  | 5.498891438  | 4.80208491   |
| 24147 | 8.354762507  | 7.1121207 | 5.869478983  | -0.352108471 | -0.352108471 | -0.352108471 |
| 24149 | 6.515586665  | 5.8523414 | 6.183964016  | -0.352108471 | -0.352108471 | -0.352108471 |
| 25758 | 7.137727412  | 8.0961514 | 6.179303447  | 4.808489274  | 6.022050925  | 7.235612576  |
| 25769 | 7.491883962  | 3.5667388 | 5.529311366  | 1.542169626  | 1.646479888  | 1.437859363  |
| 25771 | -0.352108471 | -0.352108 | -0.352108471 | 6.497182024  | 6.515031054  | 6.479332994  |
| 25777 | 6.431242245  | 4.9613992 | 7.901085311  | 5.559035342  | 4.968668467  | 5.263851904  |
| 25778 | 6.904464102  | 8.3825326 | 9.860601197  | 7.793995347  | 6.528630518  | 5.263265689  |
| 25788 | 5.052267685  | 6.5778282 | 3.526707186  | 1.270297347  | 2.445220679  | 0.095374015  |
| 25789 | -0.352108471 | -0.352108 | -0.352108471 | 5.20126514   | 6.938822793  | 6.070043966  |
| 25792 | -0.352108471 | -0.352108 | -0.352108471 | 7.592712528  | 6.004304985  | 9.181120071  |
| 25793 | 5.939192221  | 5.9583594 | 5.920025058  | 6.165870606  | 6.174080069  | 6.157661143  |
| 25796 | 7.148954265  | 8.9209069 | 5.377001652  | 2.211943219  | 2.232575625  | 2.191310813  |
| 25797 | 6.396868383  | 6.4105853 | 6.383151496  | -0.352108471 | -0.352108471 | -0.352108471 |
| 25798 | 5.895233955  | 6.7737408 | 7.652247604  | 1.76984594   | 1.807952763  | 1.731739118  |
| 25803 | 8.739692952  | 2.5106286 | 5.625160771  | -0.352108471 | -0.352108471 | -0.352108471 |
| 25804 | 9.020520975  | 7.0131595 | 11.02788243  | 7.913286824  | 6.710517437  | 9.116056211  |
| 25813 | -0.352108471 | -0.352108 | -0.352108471 | 7.329088911  | 7.342696275  | 7.315481548  |
| 25814 | 7.501341961  | 6.6741289 | 5.846915796  | 7.234851541  | 8.097755087  | 6.371947996  |
| 25820 | 5.042557899  | 4.8304259 | 5.254689875  | -0.352108471 | -0.352108471 | -0.352108471 |
| 25824 | 6.242048279  | 6.2558778 | 6.228218771  | 7.751300689  | 7.675016565  | 7.827584812  |
| 25825 | 7.503256399  | 6.7823741 | 8.22413865   | 2.193505993  | 10.08152408  | 6.137515038  |
| 25828 | 6.8086681    | 7.0305038 | 7.252339507  | 5.777198307  | 8.472954681  | 7.125076494  |
| 25829 | 8.35539256   | 7.5180418 | 6.680690993  | 7.013360586  | 8.786278928  | 5.240442244  |
| 25831 | -0.352108471 | -0.352108 | -0.352108471 | 7.435116686  | 6.168525672  | 8.701707699  |
| 25832 | -0.352108471 | -0.352108 | -0.352108471 | 5.006450696  | 5.88700099   | 6.767551284  |
| 25833 | 6.735779686  | 6.9777913 | 6.493768102  | -0.352108471 | -0.352108471 | -0.352108471 |
| 25836 | 7.15770761   | 7.7593147 | 6.556100517  | -0.352108471 | -0.352108471 | -0.352108471 |
| 25839 | -0.352108471 | -0.352108 | -0.352108471 | 5.596916991  | 6.24931616   | 4.944517823  |
| 25840 | 4.824032789  | 4.7079127 | 4.765972752  | 5.171890839  | 4.912488812  | 5.042189825  |
| 25844 | 7.989609428  | 5.4377196 | 6.713664529  | 7.26625021   | 7.431136247  | 7.348693229  |
| 25849 | -0.352108471 | -0.352108 | -0.352108471 | 5.280760807  | 6.396868383  | 7.512975958  |
| 25850 | 5.019282955  | 6.1912665 | 3.847299435  | 0.228373553  | 0.808855576  | -0.352108471 |
| 25851 | 8.69435141   | 7.6966204 | 6.69888932   | 6.376166133  | 5.902534088  | 5.428902042  |
| 25852 | -0.352108471 | -0.352108 | -0.352108471 | 7.251624328  | 5.157688188  | 6.204656258  |
| 25853 | -0.352108471 | -0.352108 | -0.352108471 | 6.222672199  | 7.248887173  | 6.735779686  |
| 25855 | 2.226167861  | 4.9116502 | 7.597132555  | 6.847584365  | 5.924443035  | 5.001301705  |
| 25859 | 4.793544035  | 3.5642559 | 4.178899946  | 1.344088765  | 2.460345581  | 3.576602397  |
| 25862 | 7.134726894  | 9.024607  | 8.079666968  | 7.928821329  | 6.335196408  | 4.741571486  |
| 25865 | 4.515242679  | 5.9245596 | 5.219901144  | 4.178899946  | 4.245214285  | 4.112585606  |
| 25870 | 3.636824788  | 1.5378098 | 5.735839732  | 3.789390581  | 6.263986052  | 5.026688316  |

|       |              |           |              |              |              |              |
|-------|--------------|-----------|--------------|--------------|--------------|--------------|
| 25873 | 8.239261726  | 8.3045466 | 8.271904178  | 8.677025842  | 8.209022413  | 9.145029272  |
| 25874 | 4.188589018  | 3.8435025 | 4.016045771  | 8.491743211  | 7.54696179   | 6.602180368  |
| 25880 | -0.352108471 | -0.352108 | -0.352108471 | 4.679286418  | 4.234485981  | 4.456886199  |
| 25885 | 6.369156591  | 6.3831515 | 6.355161685  | 0.95025487   | 2.252618212  | -0.352108471 |
| 25886 | 2.280956994  | -0.352108 | 4.914022459  | 2.024343053  | 2.051108653  | 1.997577452  |
| 25888 | 5.173604895  | 6.0767166 | 5.625160771  | -0.352108471 | -0.352108471 | -0.352108471 |
| 25891 | -0.352108471 | -0.352108 | -0.352108471 | 9.057897116  | 6.415928975  | 3.773960833  |
| 25893 | 8.21367466   | 8.9912187 | 7.436130605  | 5.676459262  | 6.201109411  | 5.938784336  |
| 25894 | 5.428393874  | 5.4582551 | 5.398532684  | -0.352108471 | -0.352108471 | -0.352108471 |
| 25895 | 4.501003242  | 3.6761388 | 5.325867653  | 5.923573886  | 5.653299811  | 6.193847962  |
| 25896 | 4.925859754  | 4.4385056 | 3.951151354  | 3.676310814  | 1.622488375  | -0.431334064 |
| 25900 | -0.352108471 | -0.352108 | -0.352108471 | 6.145829416  | 5.494417177  | 4.843004937  |
| 25902 | 5.493783215  | 5.5293114 | 5.458255064  | 0.044132154  | 0.440372779  | -0.352108471 |
| 25903 | -0.352108471 | -0.352108 | -0.352108471 | 6.235921161  | 7.263144806  | 5.208697515  |
| 25906 | -0.352108471 | -0.352108 | -0.352108471 | 5.637296679  | 5.653299811  | 5.621293547  |
| 25907 | 4.855716014  | 5.6886226 | 6.52152928   | 10.54566481  | 6.923170513  | 3.300676219  |
| 25909 | 7.510033523  | 3.5198879 | 5.514960729  | 5.980334028  | 4.939932211  | 7.020735846  |
| 25912 | 8.359763066  | 5.3341511 | 6.846957097  | 8.400734706  | 6.671874638  | 4.943014571  |
| 25913 | -0.352108471 | -0.352108 | -0.352108471 | 8.975872463  | 5.063102822  | 7.019487643  |
| 25914 | -0.352108471 | -0.352108 | -0.352108471 | 4.477281902  | 6.09266681   | 5.284974356  |
| 25915 | -0.352108471 | -0.352108 | -0.352108471 | 5.688622647  | 5.715557343  | 5.661687951  |
| 25917 | 5.078146788  | 4.8304259 | 5.325867653  | 5.637576964  | 5.529311366  | 5.745842563  |
| 25920 | -0.352108471 | -0.352108 | -0.352108471 | 5.919459543  | 6.278508208  | 5.560410879  |
| 25921 | 6.433318728  | 9.2419754 | 3.624662043  | 7.311199987  | 6.72156463   | 6.131929274  |
| 25923 | 5.023812365  | 5.4994153 | 4.54820943   | 4.489274171  | 7.86441047   | 6.176842321  |
| 25926 | -0.352108471 | -0.352108 | -0.352108471 | 1.775848523  | 1.025548163  | 1.400698343  |
| 25927 | 2.280956994  | -0.352108 | 4.914022459  | -0.352108471 | -0.352108471 | -0.352108471 |
| 25929 | -0.352108471 | -0.352108 | -0.352108471 | 0.793818797  | -0.352108471 | 1.939746065  |
| 25930 | 7.136294354  | 6.6652281 | 7.607360639  | 6.345275458  | 6.389019324  | 6.301531591  |
| 25932 | -0.352108471 | -0.352108 | -0.352108471 | 9.445616569  | 7.232744539  | 8.339180554  |
| 25934 | -0.352108471 | -0.352108 | -0.352108471 | 6.265475706  | 5.169157826  | 4.072839945  |
| 25936 | 6.424082183  | 11.182436 | 8.803259273  | 9.944604641  | 7.377142908  | 4.809681175  |
| 25937 | 4.422424947  | 6.3195146 | 8.216604336  | 6.632545947  | 5.027876734  | 3.423207522  |
| 25938 | 9.010718858  | 7.8257767 | 6.640834571  | 6.237446502  | 7.268440449  | 6.752943475  |
| 25939 | -0.352108471 | -0.352108 | -0.352108471 | 5.153651595  | 5.805628974  | 6.457606352  |
| 25940 | -0.352108471 | -0.352108 | -0.352108471 | 5.169157826  | 5.191222747  | 5.147092904  |
| 25941 | -0.352108471 | -0.352108 | -0.352108471 | 5.33204173   | 6.310779945  | 5.821410838  |
| 25942 | 4.792303669  | 4.1298287 | 5.454778632  | 2.351086241  | 5.054280952  | -0.352108471 |
| 25943 | -0.352108471 | -0.352108 | -0.352108471 | 5.939192221  | 4.081849691  | 7.796534752  |
| 25948 | -0.352108471 | -0.352108 | -0.352108471 | 7.115661583  | 6.359270363  | 5.602879144  |
| 25959 | 7.697484075  | 9.1502511 | 6.244717039  | 6.810436227  | 6.720696571  | 6.900175883  |
| 25960 | 5.017136436  | 4.5054147 | 5.528858208  | 7.517670946  | 7.292630803  | 7.742711089  |
| 25963 | 2.523212107  | -0.352108 | 5.398532684  | -0.352108471 | -0.352108471 | -0.352108471 |
| 25970 | -0.352108471 | -0.352108 | -0.352108471 | 5.437466772  | 7.240174153  | 9.042881535  |
| 25973 | 6.088359503  | 7.3786306 | 4.798088381  | 6.188322428  | 6.047709107  | 6.328935748  |
| 25977 | -0.352108471 | -0.352108 | -0.352108471 | 6.12990004   | 6.135204448  | 6.124595632  |
| 25979 | 7.137727412  | 8.2531302 | 6.022324617  | -0.352108471 | -0.352108471 | -0.352108471 |

|       |              |           |              |              |              |              |
|-------|--------------|-----------|--------------|--------------|--------------|--------------|
| 25983 | 2.764225616  | -0.352108 | 5.880559702  | -0.352108471 | -0.352108471 | -0.352108471 |
| 25987 | -0.352108471 | -0.352108 | -0.352108471 | 3.585121301  | 3.615460478  | 3.554782125  |
| 25994 | 5.829112626  | 5.6118503 | 5.394588051  | 7.869489252  | 5.060292738  | 2.251096224  |
| 25996 | 5.834507644  | 4.3443168 | 5.089412202  | 6.434644758  | 8.477424734  | 4.391864782  |
| 25998 | 3.80092067   | 4.4826926 | 3.119148782  | 3.820525905  | 4.954218546  | 2.686833264  |
| 25999 | 6.801813774  | 6.8152071 | 6.788420481  | 7.364389464  | 7.386082653  | 7.342696275  |
| 26000 | 6.151585628  | 6.1679668 | 6.135204448  | 5.017136436  | 5.054280952  | 4.979991919  |
| 26001 | -0.352108471 | -0.352108 | -0.352108471 | 6.840114058  | 6.859202315  | 6.821025802  |
| 26002 | -0.352108471 | -0.352108 | -0.352108471 | 6.296043865  | 7.166259349  | 5.425828382  |
| 26003 | 4.615583513  | 6.4299117 | 2.801255293  | 7.427681558  | 6.462808162  | 5.497934765  |
| 26005 | -0.352108471 | -0.352108 | -0.352108471 | 8.084487417  | 6.056053999  | 4.027620581  |
| 26007 | 1.392109249  | 1.5104972 | 1.273721318  | 6.914866099  | 4.756190645  | 5.835528372  |
| 26010 | 7.527781259  | 6.9571344 | 8.098428135  | 6.29311442   | 7.059223646  | 6.676169033  |
| 26012 | 5.90029238   | 7.5915796 | 4.209005204  | 2.211943219  | -1.875832852 | 6.29971929   |
| 26015 | 5.493783215  | 4.035437  | 6.952129465  | -0.352108471 | -0.352108471 | -0.352108471 |
| 26017 | -0.352108471 | -0.352108 | -0.352108471 | 6.537383725  | 7.310428491  | 5.764338958  |
| 26019 | 4.792303669  | 6.0135727 | 3.571034613  | 5.359116665  | 6.196807598  | 7.034498531  |
| 26020 | 8.769684609  | 8.0756067 | 7.381528794  | 7.889819055  | 6.071471362  | 9.708166747  |
| 26022 | 7.204336147  | 7.203004  | 7.203670057  | -0.352108471 | -0.352108471 | -0.352108471 |
| 26024 | 4.656559241  | 3.5873447 | 5.725773777  | 1.394345699  | 1.14221151   | 1.646479888  |
| 26027 | 6.704621053  | 6.7508628 | 6.658379305  | 4.456886199  | 4.482692559  | 4.43107984   |
| 26030 | 2.666473317  | 2.1599023 | 1.653331202  | 4.623293667  | 5.789762726  | 6.956231785  |
| 26032 | 6.828623008  | 6.183964  | 5.539305023  | -0.352108471 | -0.352108471 | -0.352108471 |
| 26035 | 5.625160771  | 5.6532998 | 5.597021732  | -0.352108471 | -0.352108471 | -0.352108471 |
| 26036 | 3.635275312  | 5.743428  | 7.851580631  | 6.254539546  | 5.621763229  | 6.887315863  |
| 26037 | 5.354685649  | 5.6410916 | 5.068279745  | -0.352108471 | -0.352108471 | -0.352108471 |
| 26038 | 4.688098262  | 5.8818505 | 5.284974356  | 3.919505936  | 3.919505936  | 3.919505936  |
| 26039 | 6.090808341  | 6.8981999 | 5.283416735  | -0.352108471 | -0.352108471 | -0.352108471 |
| 26047 | 4.682964349  | 4.9799919 | 4.385936778  | 1.290035436  | 1.14221151   | 1.437859363  |
| 26050 | 4.731111372  | 4.8304259 | 4.631796822  | -0.352108471 | -0.352108471 | -0.352108471 |
| 26053 | 2.38621749   | 5.1245435 | -0.352108471 | -0.352108471 | -0.352108471 | -0.352108471 |
| 26056 | 3.43439816   | 5.7494021 | 8.064406068  | 4.248375265  | 6.033399587  | 7.818423909  |
| 26058 | 5.169850962  | 5.9344202 | 6.698989371  | 3.808570573  | 7.638400459  | 5.723485516  |
| 26059 | -0.352108471 | -0.352108 | -0.352108471 | 0.682499127  | 1.563603021  | 2.444706916  |
| 26060 | 5.747047015  | 5.4147563 | 5.08246552   | 5.866748145  | 5.31909676   | 4.771445375  |
| 26063 | -0.352108471 | -0.352108 | -0.352108471 | 2.162584513  | 2.168105043  | 2.173625573  |
| 26064 | -0.352108471 | -0.352108 | -0.352108471 | 6.960789244  | 8.530865821  | 10.1009424   |
| 26065 | -0.352108471 | -0.352108 | -0.352108471 | 3.585121301  | 3.615460478  | 3.554782125  |
| 26071 | 6.345267449  | 6.0203811 | 5.695494734  | 8.574165946  | 5.789762726  | 3.005359505  |
| 26073 | -0.352108471 | -0.352108 | -0.352108471 | 5.269179996  | 7.516030975  | 9.762881953  |
| 26080 | 7.368669107  | 7.2517577 | 7.134846261  | 4.219481858  | 7.936945973  | 6.078213916  |
| 26082 | 5.298277456  | 5.6504741 | 6.002670694  | 2.099323895  | 0.771269572  | 3.427378218  |
| 26086 | -0.352108471 | -0.352108 | -0.352108471 | 5.494417177  | 5.494417177  | 5.494417177  |
| 26088 | -0.352108471 | -0.352108 | -0.352108471 | 3.928167375  | 4.482667582  | 3.373667168  |
| 26090 | -0.352108471 | -0.352108 | -0.352108471 | -0.17577123  | 1.77365078   | 3.72307279   |
| 26091 | -0.352108471 | -0.352108 | -0.352108471 | 6.4832423    | 8.644488633  | 7.563865467  |
| 26092 | 6.766662835  | 7.0780531 | 6.455272547  | 3.46613827   | 1.437859363  | 5.494417177  |

|       |              |           |              |              |              |              |
|-------|--------------|-----------|--------------|--------------|--------------|--------------|
| 26093 | 5.591305588  | 5.6532998 | 5.529311366  | 0.440372779  | 0.440372779  | 0.440372779  |
| 26097 | -0.352108471 | -0.352108 | -0.352108471 | 6.165870606  | 6.174080069  | 6.157661143  |
| 26098 | -0.352108471 | -0.352108 | -0.352108471 | 7.527328194  | 6.596757815  | 5.666187437  |
| 26099 | 7.100899168  | 7.4790179 | 7.857136534  | 6.541009048  | 3.63594445   | 9.446073645  |
| 26100 | -0.352108471 | -0.352108 | -0.352108471 | 7.402120487  | 7.673820483  | 7.945520479  |
| 26108 | 5.719551143  | 8.3233271 | 3.115775196  | 5.923493182  | 4.219887391  | 7.627098973  |
| 26115 | 5.066428095  | 1.1890477 | 3.127737875  | 6.143169347  | 4.59549483   | 5.369332089  |
| 26118 | 6.092743499  | 6.5884653 | 5.597021732  | 2.147539136  | 2.147539136  | 2.147539136  |
| 26121 | 6.151585628  | 6.0425019 | 6.260669336  | -0.352108471 | -0.352108471 | -0.352108471 |
| 26128 | -0.352108471 | -0.352108 | -0.352108471 | 4.80208491   | 3.866478079  | 5.737691741  |
| 26130 | 4.665648492  | 6.0452628 | 5.355455665  | 1.713292741  | 0.301246641  | 3.12533884   |
| 26133 | 8.926425637  | 6.7545585 | 4.582691414  | 2.705533665  | 9.765170898  | 6.235352281  |
| 26135 | 7.016776417  | 7.4368762 | 6.596676625  | 6.871682855  | 7.081024566  | 6.976353711  |
| 26136 | 4.772739719  | 5.1398055 | 5.506871276  | 6.177582421  | 7.306022007  | 6.741802214  |
| 26137 | 6.241598969  | 6.3152311 | 6.167966808  | 6.372987249  | 6.410585269  | 6.33538923   |
| 26147 | 6.658666986  | 5.1419178 | 5.90029238   | -0.352108471 | -0.352108471 | -0.352108471 |
| 26155 | -0.352108471 | -0.352108 | -0.352108471 | 8.594325443  | 6.988122429  | 5.381919415  |
| 26156 | 9.754301692  | 3.8559789 | 6.805140275  | 7.101332219  | 7.822957374  | 6.379707063  |
| 26164 | 7.651123604  | 7.4068294 | 7.16253525   | 6.970121018  | 7.130171318  | 7.290221619  |
| 26167 | -0.352108471 | -0.352108 | -0.352108471 | 5.745394463  | 5.775231583  | 5.715557343  |
| 26168 | 5.557045014  | 6.1817288 | 4.932361242  | 0.289051906  | -0.352108471 | 0.930212283  |
| 26173 | -0.352108471 | -0.352108 | -0.352108471 | 5.472287825  | 5.369470884  | 5.420879354  |
| 26188 | 6.816905042  | 6.8453896 | 6.788420481  | -0.352108471 | -0.352108471 | -0.352108471 |
| 26190 | 7.170668878  | 9.403067  | 4.938270742  | 5.837931103  | 6.355161685  | 6.872392267  |
| 26191 | 6.732456343  | 6.6898785 | 6.647300562  | -0.352108471 | -0.352108471 | -0.352108471 |
| 26205 | 6.463674915  | 7.171651  | 5.755698857  | -0.352108471 | -0.352108471 | -0.352108471 |
| 26211 | -0.352108471 | -0.352108 | -0.352108471 | 0.897715333  | 2.147539136  | -0.352108471 |
| 26224 | 5.018523587  | 4.8786655 | 4.73880737   | -0.352108471 | -0.352108471 | -0.352108471 |
| 26226 | -0.352108471 | -0.352108 | -0.352108471 | 6.144999634  | 5.845499835  | 5.546000037  |
| 26227 | -0.352108471 | -0.352108 | -0.352108471 | 3.733074867  | 7.675595643  | 5.704335255  |
| 26229 | -0.352108471 | -0.352108 | -0.352108471 | 9.777151184  | 6.415584166  | 3.054017147  |
| 26234 | -0.352108471 | -0.352108 | -0.352108471 | 4.991494611  | 6.925224158  | 5.958359385  |
| 26235 | 7.772607719  | 7.0634138 | 6.354219893  | 5.017136436  | 5.731806615  | 4.302466256  |
| 26238 | 6.7845177    | 4.9799919 | 3.175466138  | 1.290035436  | 1.437859363  | 1.14221151   |
| 26253 | 2.239158726  | 1.6290946 | 2.849222896  | 0.598807818  | -0.352108471 | 1.549724107  |
| 26254 | -0.352108471 | -0.352108 | -0.352108471 | 3.652517449  | 2.096182139  | 0.539846828  |
| 26258 | 3.645361578  | 7.2071663 | 10.7689711   | 6.615527989  | 9.431840942  | 3.799215036  |
| 26259 | 1.66201518   | 3.6761388 | -0.352108471 | 1.998530673  | 6.578873173  | 4.288701923  |
| 26262 | -0.352108471 | -0.352108 | -0.352108471 | 7.112080183  | 7.125715465  | 7.0984449    |
| 26263 | 5.117115863  | 7.6761805 | 2.558051256  | -0.352108471 | -0.352108471 | -0.352108471 |
| 26267 | 6.432600891  | 5.8001998 | 5.167798684  | -0.352108471 | -0.352108471 | -0.352108471 |
| 26268 | -0.352108471 | -0.352108 | -0.352108471 | 5.708484191  | 0.529813372  | 3.119148782  |
| 26270 | -0.352108471 | -0.352108 | -0.352108471 | 5.166304952  | 3.470468384  | 1.774631816  |
| 26278 | 6.57228183   | 3.7257587 | 5.149020242  | -0.352108471 | -0.352108471 | -0.352108471 |
| 26280 | 2.430446926  | 3.3526491 | 2.891547989  | 1.968661759  | 5.065821771  | -1.128498253 |
| 26284 | 7.042523083  | 7.9121688 | 6.172877316  | 4.259416141  | 7.852691857  | 6.056053999  |
| 26286 | -0.352108471 | -0.352108 | -0.352108471 | 5.529311366  | 4.196819226  | 6.861803506  |



|       |              |           |              |              |              |              |
|-------|--------------|-----------|--------------|--------------|--------------|--------------|
| 26289 | -0.352108471 | -0.352108 | -0.352108471 | 5.01963484   | 7.19609887   | 9.372562901  |
| 26301 | -0.352108471 | -0.352108 | -0.352108471 | -0.420989195 | 4.314095009  | 1.946552907  |
| 26353 | 7.932742872  | 8.8958046 | 6.969681191  | 0.228373553  | -0.352108471 | 0.808855576  |
| 26469 | 6.964525206  | 5.0322877 | 5.998406448  | 6.204656258  | 4.100987177  | 8.308325339  |
| 26470 | -0.352108471 | -0.352108 | -0.352108471 | 5.728825219  | -0.355158691 | 2.686833264  |
| 26472 | 6.579253565  | 7.7836429 | 8.988032165  | 9.002007431  | 8.343176751  | 8.672592091  |
| 26503 | 7.623306157  | 4.7642022 | 6.193754168  | 2.348496817  | 1.14221151   | 3.554782125  |
| 26507 | 6.352053864  | 6.3831515 | 6.320956231  | 0.289051906  | -0.352108471 | 0.930212283  |
| 26509 | 9.14142521   | 7.4969383 | 5.852451476  | 8.143606005  | 8.378549486  | 8.613492966  |
| 26512 | -0.352108471 | -0.352108 | -0.352108471 | 4.178899946  | 4.912487319  | 3.445312572  |
| 26515 | 5.821144499  | 4.2689074 | 5.045025943  | 5.220888745  | 1.578759116  | 3.39982393   |
| 26517 | 5.329443517  | 3.8056644 | 2.281885189  | 6.573706302  | 7.914406915  | 9.255107528  |
| 26520 | -0.352108471 | -0.352108 | -0.352108471 | 4.58758557   | 7.458282885  | 10.3289802   |
| 26525 | 3.538981516  | 10.340762 | 6.939871798  | -0.352108471 | -0.352108471 | -0.352108471 |
| 26528 | -0.352108471 | -0.352108 | -0.352108471 | 6.635453109  | 6.617035395  | 6.653870824  |
| 26531 | 7.418556588  | 7.6404892 | 7.862421858  | 2.930976295  | 1.450757256  | 4.411195334  |
| 26578 | -0.352108471 | -0.352108 | -0.352108471 | 6.03972704   | 6.345275458  | 6.650823875  |
| 26585 | 9.095275794  | 10.150242 | 11.20520749  | 10.30212759  | 9.771865098  | 10.03699634  |
| 26610 | 6.291695869  | 6.7508628 | 5.832528937  | 5.744669453  | 6.174080069  | 5.315258837  |
| 26716 | 3.194919234  | 5.7184598 | 8.242000299  | -0.352108471 | -0.352108471 | -0.352108471 |
| 26750 | -0.352108471 | -0.352108 | -0.352108471 | 3.79520848   | 5.524906899  | 4.66005769   |
| 26953 | 7.8875673    | 6.1601688 | 7.023868057  | -0.352108471 | -0.352108471 | -0.352108471 |
| 26958 | 5.158989505  | 4.2269887 | 4.692989119  | 5.903760504  | 7.999764209  | 3.8077568    |
| 26960 | -0.352108471 | -0.352108 | -0.352108471 | 5.280838845  | 4.49290523   | 3.704971615  |
| 26985 | 8.50465951   | 7.5822179 | 6.659776387  | 5.031399336  | 7.350690663  | 9.66998199   |
| 26986 | 9.036577582  | 8.3841322 | 8.710354877  | 6.716933979  | 9.813371762  | 12.90980955  |
| 26993 | 5.676856174  | 5.3152588 | 6.038453511  | -0.352108471 | -0.352108471 | -0.352108471 |
| 26994 | 6.537383725  | 6.5498529 | 6.524914536  | 5.869665514  | 5.893442277  | 5.845888751  |
| 26996 | -0.352108471 | -0.352108 | -0.352108471 | 2.076022254  | 2.100935855  | 2.051108653  |
| 26999 | 2.803125457  | -0.352108 | 5.958359385  | -0.352108471 | -0.352108471 | -0.352108471 |
| 27000 | -0.352108471 | -0.352108 | -0.352108471 | 6.66853284   | 5.980334028  | 5.292135216  |
| 27013 | -0.352108471 | -0.352108 | -0.352108471 | 6.689369697  | 6.51496239   | 6.340555083  |
| 27018 | 5.373803093  | 6.4267817 | 5.90029238   | 8.069180721  | 7.289078056  | 6.50897539   |
| 27020 | 5.567303509  | 6.0908083 | 6.614313172  | 6.25843907   | 6.893972732  | 7.529506393  |
| 27030 | 7.233420289  | 9.5108706 | 4.955969934  | -0.352108471 | -0.352108471 | -0.352108471 |
| 27031 | 2.05053464   | 5.1811997 | 3.615867194  | 4.162109162  | 4.296218215  | 4.430327269  |
| 27032 | 8.913597772  | 5.1620002 | 7.037798976  | 6.94160582   | 5.420304984  | 8.462906656  |
| 27042 | 4.692989119  | 4.7545518 | 4.631426448  | 6.17075544   | 4.442957573  | 7.898553308  |
| 27043 | -0.352108471 | -0.352108 | -0.352108471 | 6.903642175  | 7.034710302  | 6.772574047  |
| 27044 | 5.052267685  | 5.1245435 | 4.979991919  | 6.573515752  | 6.751466056  | 6.92941636   |
| 27063 | 2.153542172  | 1.9465529 | 1.739563642  | 7.631180945  | 5.704335255  | 3.777489565  |
| 27068 | 6.30667169   | 4.8989757 | 3.491279706  | 5.854662198  | 7.633484442  | 6.74407332   |
| 27072 | 0.646228405  | 6.9494164 | 3.797822384  | 5.915852686  | 4.249204357  | 7.582501014  |
| 27085 | 3.688837602  | 1.7342855 | 2.711561556  | -0.352108471 | -0.352108471 | -0.352108471 |
| 27086 | 4.16706778   | 3.5975821 | 4.736553482  | 0.872801732  | 1.305230684  | 0.440372779  |
| 27089 | 5.482113919  | 4.9197655 | 4.357417075  | 0.044132154  | 0.440372779  | -0.352108471 |
| 27090 | -0.352108471 | -0.352108 | -0.352108471 | 9.632727286  | 6.713776402  | 3.794825517  |

|       |              |           |              |              |              |              |
|-------|--------------|-----------|--------------|--------------|--------------|--------------|
| 27095 | 6.939871798  | 8.6200365 | 5.259707065  | -0.352108471 | -0.352108471 | -0.352108471 |
| 27097 | -0.352108471 | -0.352108 | -0.352108471 | -0.72678813  | 5.150674567  | 2.211943219  |
| 27101 | 5.749402114  | 5.4035453 | 6.095258973  | 7.053070406  | 6.170264227  | 7.935876586  |
| 27102 | 6.273832259  | 5.6157769 | 6.931887572  | 8.14643898   | 6.022050925  | 3.89766287   |
| 27115 | 6.203747741  | 5.7752316 | 5.346715425  | 0.228373553  | 0.808855576  | -0.352108471 |
| 27122 | 8.994698813  | 8.5858873 | 9.40351033   | 8.126202188  | 8.322306903  | 8.224254545  |
| 27125 | -0.352108471 | -0.352108 | -0.352108471 | 5.789762726  | 5.804293869  | 5.775231583  |
| 27131 | 1.383520155  | -0.352108 | 3.119148782  | 2.880228422  | 7.944893753  | 5.412561087  |
| 27145 | 7.378771276  | 7.1689345 | 7.588608089  | 3.314032311  | 4.688318557  | 1.939746065  |
| 27148 | 0.281260669  | 3.8493234 | 2.065292044  | 5.575983727  | 3.531453418  | 7.620514035  |
| 27151 | 4.741928851  | 7.3701791 | 6.056053999  | -0.352108471 | -0.352108471 | -0.352108471 |
| 27153 | 2.596968388  | 1.3921092 | 0.18725011   | 6.534375618  | 5.704335255  | 4.874294891  |
| 27160 | 6.137515038  | 5.2714665 | 7.003563595  | 5.314908033  | 6.20719443   | 5.761051232  |
| 27161 | -0.352108471 | -0.352108 | -0.352108471 | 0.940233577  | 2.232575625  | -0.352108471 |
| 27163 | 2.907929169  | 1.6332569 | 4.182601415  | -0.352108471 | -0.352108471 | -0.352108471 |
| 27165 | -0.352108471 | -0.352108 | -0.352108471 | 5.88700099   | 6.864218611  | 4.909783368  |
| 27166 | 6.592882062  | 6.7206966 | 6.848511079  | 5.969862298  | 11.08864583  | 8.529254064  |
| 27173 | -0.352108471 | -0.352108 | -0.352108471 | 3.03902233   | 5.511864271  | 7.984706212  |
| 27183 | -0.352108471 | -0.352108 | -0.352108471 | 2.124237496  | 2.147539136  | 2.100935855  |
| 27197 | 6.103271777  | 7.3933658 | 8.683459865  | 5.326085421  | 6.906962769  | 8.487840118  |
| 27198 | 7.628446264  | 7.7405367 | 7.852627184  | 2.458478139  | 2.960269185  | 3.462060231  |
| 27201 | 5.490262688  | 5.3835036 | 5.597021732  | 1.223721097  | 1.305230684  | 1.14221151   |
| 27202 | 6.640648628  | 5.5587679 | 4.476887112  | -0.352108471 | -0.352108471 | -0.352108471 |
| 27229 | 7.077695328  | 7.7976944 | 7.437694861  | 1.76984594   | 1.807952763  | 1.731739118  |
| 27230 | -0.352108471 | -0.352108 | -0.352108471 | 6.762354676  | 7.080913136  | 6.443796216  |
| 27231 | -0.352108471 | -0.352108 | -0.352108471 | 4.569899033  | 4.477947052  | 4.385995071  |
| 27233 | 4.03844829   | 5.1062182 | 6.17398819   | 5.045930461  | 4.688318557  | 5.403542364  |
| 27236 | 2.588601447  | 3.7202533 | 1.456949631  | -0.352108471 | -0.352108471 | -0.352108471 |
| 27238 | 5.493783215  | 4.0729942 | 6.914572265  | -0.352108471 | -0.352108471 | -0.352108471 |
| 27241 | 2.783958294  | -0.352108 | 5.920025058  | -0.352108471 | -0.352108471 | -0.352108471 |
| 27243 | 6.77374078   | 6.7884205 | 6.759061079  | 6.204656258  | 6.215464554  | 6.193847962  |
| 27245 | 5.493783215  | 5.5293114 | 5.458255064  | 5.723485516  | 5.731413688  | 5.715557343  |
| 27246 | -0.352108471 | -0.352108 | -0.352108471 | 7.490962177  | 5.405071495  | 6.448016836  |
| 27247 | -0.352108471 | -0.352108 | -0.352108471 | 2.588801725  | 7.126278144  | 4.857539934  |
| 27249 | -0.352108471 | -0.352108 | -0.352108471 | 2.076156865  | 1.861166652  | 1.968661759  |
| 27252 | -0.352108471 | -0.352108 | -0.352108471 | 4.66005769   | 2.647697119  | 6.67241826   |
| 27254 | -0.352108471 | -0.352108 | -0.352108471 | 5.35767489   | 5.688622647  | 6.019570405  |
| 27257 | 6.537828779  | 6.1515856 | 5.765342478  | 5.728340377  | 7.599372572  | 6.663856474  |
| 27258 | -0.352108471 | -0.352108 | -0.352108471 | 6.636648361  | 5.973500237  | 5.310352113  |
| 27287 | 4.140892218  | 4.9042312 | 5.667570149  | 7.861581775  | 4.665641434  | 6.263611604  |
| 27292 | -0.352108471 | -0.352108 | -0.352108471 | 6.056053999  | 6.073654487  | 6.038453511  |
| 27297 | 6.132049638  | 6.0023087 | 6.261790604  | 6.013323705  | 6.497336045  | 5.529311366  |
| 27303 | 3.755482464  | 5.6574939 | 7.559505297  | -0.352108471 | -0.352108471 | -0.352108471 |
| 27304 | 6.427305038  | 6.9120012 | 7.396697329  | 7.124174257  | 7.486619122  | 6.761729393  |
| 27309 | -0.352108471 | -0.352108 | -0.352108471 | 8.075580324  | 6.32531018   | 4.575040036  |
| 27315 | 3.046628152  | 4.3296817 | 1.763574581  | 7.288837175  | 6.266367194  | 5.243897212  |
| 27327 | 6.183964016  | 5.6139114 | 6.754016618  | 8.870202908  | 2.554323947  | 5.712263427  |

|       |              |           |              |              |              |              |
|-------|--------------|-----------|--------------|--------------|--------------|--------------|
| 27332 | 4.834101937  | 4.9140225 | 4.754181416  | -0.352108471 | -0.352108471 | -0.352108471 |
| 27333 | 7.014830488  | 6.8158326 | 7.213828363  | 7.405008048  | 7.661556013  | 7.148460083  |
| 27334 | 5.908529786  | 7.3595674 | 8.810605066  | 7.405907392  | 3.264792644  | 5.335350018  |
| 27335 | -0.352108471 | -0.352108 | -0.352108471 | 8.603159288  | 7.025721295  | 5.448283302  |
| 27336 | -0.352108471 | -0.352108 | -0.352108471 | 5.17624662   | 4.456886199  | 3.737525779  |
| 27338 | 6.123464522  | 6.573969  | 7.024473477  | 8.283357691  | 11.84096615  | 4.725749232  |
| 27339 | 6.916902905  | 6.3259785 | 5.735054062  | 8.122270746  | 8.096623898  | 8.070977051  |
| 27340 | 4.72290018   | 6.5274214 | 5.625160771  | -0.352108471 | -0.352108471 | -0.352108471 |
| 27341 | 8.441583316  | 5.4677681 | 6.954675705  | 4.935567507  | 2.420058224  | 3.677812865  |
| 27343 | -0.352108471 | -0.352108 | -0.352108471 | 6.180884509  | 6.641226906  | 7.101569303  |
| 27345 | 6.709860607  | 5.4581656 | 4.206470524  | 4.601932212  | 6.081561369  | 7.561190526  |
| 27346 | -0.352108471 | -0.352108 | -0.352108471 | 7.649421913  | 4.435200535  | 6.042311224  |
| 27347 | -0.352108471 | -0.352108 | -0.352108471 | 5.017136436  | 5.659255615  | 4.375017256  |
| 27348 | -0.352108471 | -0.352108 | -0.352108471 | 6.12990004   | 8.158514235  | 4.101285845  |
| 27350 | -0.352108471 | -0.352108 | -0.352108471 | 5.032557161  | 9.327101948  | 7.179829555  |
| 27352 | -0.352108471 | -0.352108 | -0.352108471 | 7.77741297   | 5.426310767  | 6.601861868  |
| 27433 | 5.800199788  | 6.6856637 | 4.914735866  | -0.352108471 | -0.352108471 | -0.352108471 |
| 27434 | 2.728078487  | 4.5853023 | 3.656690413  | -0.352108471 | -0.352108471 | -0.352108471 |
| 27436 | 1.383520155  | 0.3166727 | 2.450367626  | 6.355161685  | 3.937328752  | 8.772994618  |
| 27440 | -0.352108471 | -0.352108 | -0.352108471 | 4.553130743  | 6.721462614  | 5.637296679  |
| 27443 | 8.386263177  | 4.8853777 | 6.635820429  | 6.488107881  | 4.154692756  | 8.821523006  |
| 27445 | 7.461044856  | 5.466305  | 6.463674915  | -0.352108471 | -0.352108471 | -0.352108471 |
| 28232 | 6.985681406  | 6.8610575 | 6.736433582  | 8.386851221  | 6.621168045  | 4.85548487   |
| 28511 | 5.711094862  | 7.4440762 | 3.978113556  | 1.769397609  | 1.437859363  | 2.100935855  |
| 28512 | -0.352108471 | -0.352108 | -0.352108471 | 6.12990004   | 5.991950789  | 6.267849292  |
| 28513 | 2.33062269   | 9.2697769 | 5.800199788  | -0.352108471 | -0.352108471 | -0.352108471 |
| 28952 | -0.352108471 | -0.352108 | -0.352108471 | 3.089363405  | 2.301055037  | 1.51274667   |
| 28955 | 6.020381091  | 6.0384535 | 6.002308672  | 6.804783999  | 6.729085562  | 6.880482436  |
| 28956 | -0.352108471 | -0.352108 | -0.352108471 | 7.936959839  | 6.804723141  | 5.672486444  |
| 28958 | 5.804500999  | 4.0895134 | 4.947007189  | 1.036211897  | 1.14221151   | 0.930212283  |
| 28962 | 1.949648284  | 1.390066  | 1.66985715   | 5.483227165  | 6.065730918  | 4.900723412  |
| 28964 | 7.741402636  | 4.95698   | 6.349191313  | 6.956278745  | 8.93000611   | 4.98255138   |
| 28971 | 6.433318728  | 5.706274  | 7.160363456  | -0.352108471 | -0.352108471 | -0.352108471 |
| 28972 | 6.237359685  | 4.4008338 | 5.31909676   | 8.717686121  | 3.530048435  | 6.123867278  |
| 28973 | 6.396868383  | 5.7609201 | 7.03281671   | -0.352108471 | -0.352108471 | -0.352108471 |
| 28974 | 6.37860232   | 6.7251418 | 6.55187204   | 10.67494309  | 7.311506909  | 3.94807073   |
| 28976 | -0.352108471 | -0.352108 | -0.352108471 | 4.927679215  | 4.954218546  | 4.901139884  |
| 28977 | 1.895892502  | 2.9815613 | 4.067230157  | -0.352108471 | -0.352108471 | -0.352108471 |
| 28982 | 5.339283507  | 7.1507213 | 3.527845723  | 2.393884559  | 2.100935855  | 2.686833264  |
| 28984 | -0.352108471 | -0.352108 | -0.352108471 | 6.945665103  | 6.204656258  | 5.463647413  |
| 28985 | -0.352108471 | -0.352108 | -0.352108471 | 6.825079184  | 5.983174787  | 7.66698358   |
| 28987 | -0.352108471 | -0.352108 | -0.352108471 | 4.209585124  | 4.497788032  | 4.353686578  |
| 28988 | 6.292446905  | 5.2562937 | 5.774370319  | 6.463674915  | 6.106300602  | 6.821049228  |
| 28991 | 5.386363878  | 6.3968684 | 7.407372887  | 5.864389623  | 5.575983727  | 5.28757783   |
| 28992 | 1.383520155  | -0.352108 | 3.119148782  | 5.830669655  | 5.81215202   | 5.821410838  |
| 29015 | -0.352108471 | -0.352108 | -0.352108471 | 5.958359385  | 3.303235231  | 8.613483538  |
| 29028 | 1.605426148  | 3.1277379 | 4.650049603  | 7.063180684  | 4.579640992  | 5.821410838  |

|       |              |           |              |              |              |              |
|-------|--------------|-----------|--------------|--------------|--------------|--------------|
| 29035 | -0.352108471 | -0.352108 | -0.352108471 | 2.902991023  | 3.119148782  | 2.686833264  |
| 29058 | -0.352108471 | -0.352108 | -0.352108471 | 5.457623201  | 7.609959778  | 9.762296355  |
| 29062 | 1.313555951  | 4.0160458 | 6.718535591  | 4.34283885   | 5.907753157  | 7.472667463  |
| 29063 | 6.67661128   | 5.1446553 | 5.91063331   | 5.334050769  | 5.961166865  | 6.588282961  |
| 29066 | -0.352108471 | -0.352108 | -0.352108471 | 5.789762726  | 2.529204905  | 9.050320547  |
| 29070 | 7.947233071  | 8.1005797 | 7.793886488  | 6.557896833  | 6.33538923   | 6.780404436  |
| 29071 | -0.352108471 | -0.352108 | -0.352108471 | 6.137282446  | 4.921340285  | 5.529311366  |
| 29072 | -0.352108471 | -0.352108 | -0.352108471 | 4.80208491   | 3.777692081  | 5.82647774   |
| 29074 | 5.601327606  | 5.2299739 | 5.415650777  | 6.45373869   | 6.4770882    | 6.430389181  |
| 29075 | -0.109652291 | 2.3862175 | 4.882087271  | 4.057445307  | 2.097551045  | 6.017339569  |
| 29078 | 5.391018164  | 4.2504633 | 6.531573067  | 4.52596196   | 6.306122915  | 8.086283871  |
| 29081 | 2.803125457  | 4.5829492 | 1.023301716  | -0.352108471 | -0.352108471 | -0.352108471 |
| 29082 | -0.352108471 | -0.352108 | -0.352108471 | 0.762376451  | -0.352108471 | 1.876861374  |
| 29085 | -0.352108471 | -0.352108 | -0.352108471 | 6.70825981   | 6.595493818  | 6.821025802  |
| 29086 | 8.376699525  | 4.4483834 | 6.412541451  | 8.670516551  | 7.450257203  | 6.229997854  |
| 29089 | 6.674128879  | 8.0685603 | 5.279697499  | 4.80208491   | 5.737295227  | 3.866874593  |
| 29090 | -0.352108471 | -0.352108 | -0.352108471 | 6.959144107  | 6.08682898   | 5.214513852  |
| 29093 | -0.352108471 | -0.352108 | -0.352108471 | 1.937219413  | 1.997577452  | 1.876861374  |
| 29099 | 4.522388273  | 4.6499796 | 4.777570964  | 6.362189164  | 7.561371235  | 6.9617802    |
| 29100 | 5.019282955  | 3.9175304 | 6.121035531  | 5.328767528  | 7.135075351  | 8.941383175  |
| 29101 | 7.764328239  | 6.4218119 | 9.106844563  | 9.151802906  | 7.763821673  | 6.37584044   |
| 29102 | 1.66201518   | 3.6761388 | -0.352108471 | 5.284974356  | 5.315258837  | 5.254689875  |
| 29103 | 6.754558526  | 6.7884205 | 6.720696571  | 7.680867551  | 7.629372342  | 7.73236276   |
| 29105 | -0.352108471 | -0.352108 | -0.352108471 | 8.854101178  | 6.259177972  | 3.664254767  |
| 29109 | 1.946552907  | 2.8538579 | 1.039247916  | 6.905698177  | 7.839688273  | 8.77367837   |
| 29117 | 6.73711611   | 6.9134889 | 7.089861686  | 4.001756877  | 4.927679215  | 5.853601553  |
| 29121 | 5.688235857  | 7.2324736 | 8.776711429  | 6.830603111  | 9.265033524  | 4.396172698  |
| 29123 | 3.627066922  | 2.8946573 | 2.162247722  | 6.289738157  | 6.686930883  | 6.48833452   |
| 29127 | -0.352108471 | -0.352108 | -0.352108471 | 9.178499758  | 5.26977979   | 7.224139774  |
| 29128 | -0.352108471 | -0.352108 | -0.352108471 | 5.903760504  | 5.926961306  | 5.880559702  |
| 29763 | 5.55876787   | 5.5882244 | 5.529311366  | -0.352108471 | -0.352108471 | -0.352108471 |
| 29766 | 6.446862061  | 6.1676355 | 5.888409016  | 6.960593515  | 6.597901644  | 6.235209772  |
| 29767 | 5.836958364  | 5.7155573 | 5.958359385  | 1.82202867   | 1.646479888  | 1.997577452  |
| 29774 | 6.396868383  | 3.4554413 | 9.338295475  | 0.044132154  | 0.440372779  | -0.352108471 |
| 29781 | -0.352108471 | -0.352108 | -0.352108471 | 7.700643532  | 5.637296679  | 3.573949826  |
| 29789 | 3.515141236  | 3.6761388 | 3.354143641  | 3.80889006   | 6.523594479  | 9.238298897  |
| 29796 | 5.656289537  | 4.2749393 | 7.037639786  | 8.539973503  | 6.611098778  | 4.682224053  |
| 29797 | 5.366764601  | 6.0203811 | 6.673997582  | 0.685292531  | 0.440372779  | 0.930212283  |
| 29799 | 5.254651642  | 3.8755155 | 6.633787817  | 5.980977506  | 6.526979592  | 5.434975419  |
| 29803 | -0.352108471 | -0.352108 | -0.352108471 | 5.511864271  | 4.864368089  | 6.159360454  |
| 29842 | -0.352108471 | -0.352108 | -0.352108471 | 2.069671431  | 5.775068216  | 9.480465001  |
| 29843 | -0.352108471 | -0.352108 | -0.352108471 | 3.856760004  | 7.917241976  | 5.88700099   |
| 29844 | -0.352108471 | -0.352108 | -0.352108471 | 7.004815064  | 4.998803199  | 6.001809131  |
| 29855 | -0.352108471 | -0.352108 | -0.352108471 | 6.056844696  | 5.58597698   | 5.821410838  |
| 29880 | -0.352108471 | -0.352108 | -0.352108471 | 5.88700099   | 5.893442277  | 5.880559702  |
| 29881 | -0.352108471 | -0.352108 | -0.352108471 | 6.417337328  | 4.456886199  | 2.496435071  |
| 29886 | 6.98667423   | 6.3034612 | 5.620248259  | 7.583649138  | 6.038266652  | 6.810957895  |

|       |              |           |              |              |              |              |
|-------|--------------|-----------|--------------|--------------|--------------|--------------|
| 29888 | 5.657419033  | 8.7317979 | 7.194608474  | 8.652188099  | 6.963991695  | 5.275795291  |
| 29889 | -0.352108471 | -0.352108 | -0.352108471 | 5.821410838  | 1.461677386  | 10.18114429  |
| 29890 | 4.469217117  | 5.5587679 | 6.648318624  | 6.343016691  | 7.094349975  | 7.845683258  |
| 29894 | 5.979826013  | 5.1841515 | 4.38847697   | -0.352108471 | -0.352108471 | -0.352108471 |
| 29896 | -0.352108471 | -0.352108 | -0.352108471 | 6.092569559  | 5.567460487  | 5.042351414  |
| 29901 | -0.352108471 | -0.352108 | -0.352108471 | 6.455934733  | 6.33538923   | 6.576480236  |
| 29903 | -0.352108471 | -0.352108 | -0.352108471 | 5.613451577  | 5.946831771  | 5.280071383  |
| 29904 | 6.502554792  | 5.803801  | 7.201308571  | 2.546625611  | 1.939746065  | 3.153505157  |
| 29911 | -0.352108471 | -0.352108 | -0.352108471 | 5.494417177  | 5.494417177  | 5.494417177  |
| 29919 | -0.352108471 | -0.352108 | -0.352108471 | 4.188928666  | 6.022050925  | 7.855173184  |
| 29920 | 7.301234227  | 4.5771502 | 5.939192221  | -0.352108471 | -0.352108471 | -0.352108471 |
| 29923 | 6.20709195   | 7.4357282 | 6.821410068  | -1.517590719 | 4.467754991  | 1.475082136  |
| 29924 | 6.833507336  | 7.3424546 | 7.851401826  | 6.804723141  | 7.294257377  | 6.315188906  |
| 29926 | 0.683997153  | 2.1002213 | 1.392109249  | 7.487653701  | 9.971551837  | 5.003755565  |
| 29927 | 7.366953672  | 7.389392  | 7.378172854  | 6.819832971  | 7.470685508  | 8.121538044  |
| 29934 | -0.352108471 | -0.352108 | -0.352108471 | 6.345275458  | 3.946190247  | 8.744360668  |
| 29946 | -0.352108471 | -0.352108 | -0.352108471 | 7.326250104  | 6.087644454  | 4.849038805  |
| 29951 | 5.640469507  | 7.6755769 | 6.658023207  | -0.352108471 | -0.352108471 | -0.352108471 |
| 29952 | 6.208649533  | 7.0390623 | 6.623855918  | -0.352108471 | -0.352108471 | -0.352108471 |
| 29956 | 9.36603002   | 4.044545  | 6.705287512  | 5.842848767  | 6.434644758  | 7.02644075   |
| 29957 | 5.939192221  | 5.857316  | 6.02106846   | 6.51496239   | 9.652757569  | 3.377167212  |
| 29959 | -0.352108471 | -0.352108 | -0.352108471 | 7.699813202  | 6.12990004   | 4.559986878  |
| 29964 | 7.144008157  | 4.9328989 | 6.038453511  | -0.352108471 | -0.352108471 | -0.352108471 |
| 29965 | 8.786386489  | 6.7357797 | 4.685172883  | 6.415928975  | 6.429470164  | 6.402387785  |
| 29966 | 4.325659144  | 3.5193274 | 2.712995574  | 4.178899946  | 4.744513663  | 3.613286229  |
| 29969 | 4.152721357  | 4.0758489 | 4.229593859  | 7.776147191  | 4.977438041  | 6.376792616  |
| 29978 | -0.352108471 | -0.352108 | -0.352108471 | 4.863235064  | 6.751466056  | 8.639697048  |
| 29979 | -0.352108471 | -0.352108 | -0.352108471 | 4.581212806  | 6.243909369  | 5.412561087  |
| 29982 | 6.51219561   | 6.8668803 | 6.689537938  | -0.352108471 | -0.352108471 | -0.352108471 |
| 29984 | -0.352108471 | -0.352108 | -0.352108471 | 7.455642915  | 4.318359065  | 5.88700099   |
| 29985 | -0.352108471 | -0.352108 | -0.352108471 | 5.095423988  | 5.89269242   | 4.298155555  |
| 29997 | -0.352108471 | -0.352108 | -0.352108471 | 6.593151207  | 8.410675965  | 10.22820072  |
| 29998 | 4.482692559  | 4.4826926 | 4.482692559  | 5.64354012   | 5.665786693  | 5.621293547  |
| 30000 | 7.998904298  | 8.6756935 | 7.322115106  | 7.402857594  | 5.233567424  | 3.064277253  |
| 30001 | 6.831550127  | 4.6854967 | 5.758523395  | 1.157998715  | 2.819798514  | 1.988898614  |
| 30008 | 9.938964031  | 8.2032738 | 6.467583629  | 7.855823578  | 7.271932595  | 8.439714562  |
| 30010 | 9.023404481  | 1.0543387 | 5.038871611  | -0.352108471 | -0.352108471 | -0.352108471 |
| 30011 | -0.352108471 | -0.352108 | -0.352108471 | 6.735779686  | 6.750862801  | 6.720696571  |
| 30062 | 4.346498009  | 5.9611669 | 7.575835722  | -0.352108471 | -0.352108471 | -0.352108471 |
| 30811 | 3.682181533  | 3.5941051 | 3.770257999  | 4.195595504  | 5.124519876  | 4.66005769   |
| 30814 | -0.352108471 | -0.352108 | -0.352108471 | 5.017136436  | 7.271027803  | 2.763245068  |
| 30815 | -0.352108471 | -0.352108 | -0.352108471 | 9.489000106  | 5.878686198  | 7.683843152  |
| 30816 | 2.103572783  | 3.173969  | 1.03317661   | 8.077827351  | 5.439500958  | 2.801174564  |
| 30827 | 2.711561556  | 5.7752316 | -0.352108471 | 4.66005769   | 4.688318557  | 4.631796822  |
| 30833 | 3.968518528  | 4.2452143 | 3.69182277   | 3.245625856  | 3.337746555  | 3.153505157  |
| 30835 | 6.405394225  | 8.036012  | 4.774776465  | 1.848794271  | 2.051108653  | 1.646479888  |
| 30836 | 6.295406877  | 7.1761525 | 6.735779686  | 8.108816557  | 6.32531018   | 4.541803804  |

|       |              |           |              |              |              |              |
|-------|--------------|-----------|--------------|--------------|--------------|--------------|
| 30837 | 5.701328676  | 5.873346  | 5.529311366  | 6.669136697  | 6.549852913  | 6.788420481  |
| 30844 | -0.352108471 | -0.352108 | -0.352108471 | 6.266367194  | 6.276856601  | 6.255877787  |
| 30845 | -0.352108471 | -0.352108 | -0.352108471 | 5.011509295  | 5.529311366  | 6.047113437  |
| 30846 | 7.419575248  | 6.9601104 | 7.879040127  | 6.895988469  | 9.051419013  | 11.20684956  |
| 30968 | -0.352108471 | -0.352108 | -0.352108471 | 8.991808588  | 5.821410838  | 2.651013088  |
| 50485 | -0.352108471 | -0.352108 | -0.352108471 | 4.927679215  | 6.578636598  | 3.276721832  |
| 50486 | 5.625160771  | 6.8313888 | 4.418932781  | -0.352108471 | -0.352108471 | -0.352108471 |
| 50488 | 7.577765451  | 5.0871679 | 6.332466669  | -0.352108471 | -0.352108471 | -0.352108471 |
| 50506 | -0.352108471 | -0.352108 | -0.352108471 | 3.760567851  | 4.557244691  | 5.353921531  |
| 50509 | 7.466207166  | 8.6024546 | 6.329959688  | 6.44316181   | 6.6560422    | 6.868922591  |
| 50614 | -0.352108471 | -0.352108 | -0.352108471 | 1.194816876  | 3.119148782  | 5.043480687  |
| 50626 | 7.092979298  | 4.4058249 | 5.749402114  | -0.352108471 | -0.352108471 | -0.352108471 |
| 50649 | 5.65953574   | 5.5587679 | 5.458000001  | -0.352108471 | -0.352108471 | -0.352108471 |
| 50652 | 6.156815946  | 6.2904837 | 6.42415147   | 3.135445554  | 4.509501421  | 5.883557288  |
| 50700 | -0.352108471 | -0.352108 | -0.352108471 | 6.034789061  | 1.804222811  | 3.919505936  |
| 50717 | 6.403273394  | 4.9739719 | 5.688622647  | 5.839415865  | 7.119104888  | 6.479260377  |
| 50807 | 2.419557138  | 1.8542919 | 2.984822416  | 4.748488389  | 7.980296749  | 11.21210511  |
| 50808 | 8.315000385  | 6.711724  | 9.918276797  | 6.649742828  | 9.61437929   | 8.132061059  |
| 50809 | 6.341498931  | 6.4544986 | 6.228499221  | 8.676591527  | 7.069984516  | 5.463377505  |
| 50813 | 6.920432842  | 6.9398718 | 6.959310754  | 8.135558837  | 7.855473441  | 7.575388044  |
| 50814 | 6.012642407  | 6.5942801 | 6.303461245  | 6.287201116  | 4.665471125  | 5.47633612   |
| 50831 | -0.352108471 | -0.352108 | -0.352108471 | 2.181832679  | 2.245600013  | 2.309367347  |
| 50848 | 6.790732909  | 6.5710574 | 7.010408437  | 4.20408136   | 6.410585269  | 1.997577452  |
| 50853 | 0.688532109  | 2.4815752 | 4.274618257  | -0.352108471 | -0.352108471 | -0.352108471 |
| 50854 | 5.493783215  | 5.5293114 | 5.458255064  | 6.359270363  | 6.383151496  | 6.33538923   |
| 50861 | 5.774370319  | 6.331224  | 5.21751664   | -0.352108471 | -0.352108471 | -0.352108471 |
| 50862 | 5.617307162  | 7.1098214 | 6.363564301  | 1.697414861  | 1.14221151   | 2.252618212  |
| 50865 | 4.876360176  | 6.6400194 | 8.403678609  | 0.808855576  | 0.808855576  | 0.808855576  |
| 50937 | 4.837050227  | 4.0160458 | 3.195041315  | 4.311442591  | 8.190990035  | 6.251216313  |
| 50940 | 4.5088668    | 4.4633304 | 4.554403201  | 4.681770414  | 3.94221199   | 3.202653565  |
| 50944 | 6.035244926  | 6.3028839 | 6.570522784  | -0.352108471 | -0.352108471 | -0.352108471 |
| 51002 | 6.320360815  | 7.9158694 | 4.724852206  | 7.851395897  | 7.51420419   | 7.682800044  |
| 51008 | -0.352108471 | -0.352108 | -0.352108471 | 2.434335261  | 3.585121301  | 4.735907341  |
| 51009 | 6.096621231  | 6.8119539 | 7.527286577  | 2.92016921   | 2.686833264  | 3.153505157  |
| 51010 | 6.463674915  | 6.479333  | 6.448016836  | -0.352108471 | -0.352108471 | -0.352108471 |
| 51011 | 3.064630013  | 7.4319783 | 5.248304154  | 2.580284794  | 3.182789328  | 2.881537061  |
| 51012 | -0.352108471 | -0.352108 | -0.352108471 | 6.235921161  | 7.995067821  | 4.4767745    |
| 51014 | 5.852937462  | 4.5669565 | 7.138918437  | -0.352108471 | -0.352108471 | -0.352108471 |
| 51015 | -0.352108471 | -0.352108 | -0.352108471 | 4.086396019  | 4.456886199  | 4.82737638   |
| 51016 | -0.352108471 | -0.352108 | -0.352108471 | 6.056053999  | 7.647051903  | 4.465056095  |
| 51018 | 6.913488898  | 6.1934843 | 7.633493452  | -0.352108471 | -0.352108471 | -0.352108471 |
| 51019 | -0.352108471 | -0.352108 | -0.352108471 | 6.767480029  | 6.709581906  | 6.651683784  |
| 51020 | -0.352108471 | -0.352108 | -0.352108471 | 4.637866428  | 6.290187386  | 7.942508344  |
| 51021 | 4.3514372    | 4.4868934 | 4.622349688  | 4.56273683   | 4.121846117  | 3.680955403  |
| 51023 | -0.352108471 | -0.352108 | -0.352108471 | 5.575983727  | 6.237615023  | 4.91435243   |
| 51024 | 1.934017962  | 4.1788999 | 6.423781929  | 3.952076395  | 5.677239679  | 7.402402963  |
| 51025 | -0.352108471 | -0.352108 | -0.352108471 | 0.95025487   | -0.352108471 | 2.252618212  |



|       |              |           |              |              |              |              |
|-------|--------------|-----------|--------------|--------------|--------------|--------------|
| 51026 | 6.151585628  | 7.6177473 | 4.685423938  | -0.352108471 | -0.352108471 | -0.352108471 |
| 51031 | 6.835211701  | 4.6635925 | 5.749402114  | -0.352108471 | -0.352108471 | -0.352108471 |
| 51035 | 4.583433279  | 1.0513276 | 8.115538988  | 8.846908253  | 7.738888398  | 6.630868543  |
| 51043 | 6.849096524  | 7.0978125 | 7.346528536  | -0.352108471 | -0.352108471 | -0.352108471 |
| 51056 | -0.352108471 | -0.352108 | -0.352108471 | 7.374012451  | 6.993562721  | 6.61311299   |
| 51059 | -0.352108471 | -0.352108 | -0.352108471 | 6.235921161  | 7.095719752  | 5.37612257   |
| 51060 | -0.352108471 | -0.352108 | -0.352108471 | 5.169157826  | 5.191222747  | 5.147092904  |
| 51061 | 6.831289207  | 7.3368253 | 6.32575307   | 7.206478843  | 7.667689977  | 7.43708441   |
| 51063 | 5.017136436  | 7.8536087 | 2.180664165  | 0.228373553  | 0.808855576  | -0.352108471 |
| 51065 | 6.396868383  | 7.3700848 | 5.423651973  | 7.843360631  | 7.518229813  | 7.680795222  |
| 51067 | 2.783958294  | 5.9200251 | -0.352108471 | 0.044132154  | 0.440372779  | -0.352108471 |
| 51069 | -0.352108471 | -0.352108 | -0.352108471 | 5.442973377  | 2.894423748  | 0.345874119  |
| 51070 | 4.324986295  | 7.052259  | 5.688622647  | 4.860061001  | 5.958359385  | 7.056657768  |
| 51071 | 6.000247872  | 7.6656518 | 4.334843917  | -0.352108471 | -0.352108471 | -0.352108471 |
| 51072 | 3.392731564  | 3.1277379 | 2.862744186  | 4.244939442  | 5.017136436  | 5.78933343   |
| 51073 | -0.352108471 | -0.352108 | -0.352108471 | 6.296043865  | 6.31523113   | 6.276856601  |
| 51074 | 5.428393874  | 7.5663338 | 3.290453914  | -0.352108471 | -0.352108471 | -0.352108471 |
| 51076 | 5.980334028  | 8.6149786 | 3.345689426  | -0.352108471 | -0.352108471 | -0.352108471 |
| 51077 | 6.073315734  | 6.6142706 | 7.155225366  | 7.280806664  | 6.736151269  | 7.825462059  |
| 51078 | -0.352108471 | -0.352108 | -0.352108471 | 5.158472126  | 7.245818252  | 6.202145189  |
| 51079 | 7.685345331  | 3.505654  | 5.595499658  | 8.564944236  | 7.886327916  | 7.207711596  |
| 51081 | -0.352108471 | -0.352108 | -0.352108471 | 4.994366381  | 5.980334028  | 6.966301676  |
| 51084 | -0.352108471 | -0.352108 | -0.352108471 | 2.887746055  | 2.686833264  | 2.485920472  |
| 51088 | 7.58629982   | 5.9879683 | 6.787134073  | -0.352108471 | -0.352108471 | -0.352108471 |
| 51092 | -0.352108471 | -0.352108 | -0.352108471 | 6.056053999  | 4.802864297  | 7.309243701  |
| 51094 | 7.024132346  | 6.6741289 | 6.324125411  | 2.204376426  | 2.359882426  | 2.048870426  |
| 51095 | -0.352108471 | -0.352108 | -0.352108471 | 0.884207706  | 8.578476772  | 4.731342239  |
| 51096 | -0.352108471 | -0.352108 | -0.352108471 | 2.141970815  | 2.010073694  | 2.076022254  |
| 51097 | -0.352108471 | -0.352108 | -0.352108471 | 4.413952725  | 5.007087038  | 3.820818412  |
| 51100 | 4.475153606  | 8.1728245 | 6.323989029  | 7.897512186  | 5.273884602  | 6.585698394  |
| 51101 | -0.352108471 | -0.352108 | -0.352108471 | 6.755400952  | 5.88700099   | 5.018601028  |
| 51102 | -0.352108471 | -0.352108 | -0.352108471 | 4.80208491   | 4.442182752  | 5.161987068  |
| 51103 | -0.352108471 | -0.352108 | -0.352108471 | 5.406454269  | 6.284545401  | 5.845499835  |
| 51107 | 6.640019393  | 8.1161194 | 5.163919398  | -0.352108471 | -0.352108471 | -0.352108471 |
| 51108 | 7.194608474  | 7.2040879 | 7.18512902   | 7.429168474  | 7.443759962  | 7.414576987  |
| 51110 | 8.522309178  | 6.7233999 | 4.924490607  | -0.352108471 | -0.352108471 | -0.352108471 |
| 51115 | 4.624859933  | 4.617923  | 4.631796822  | 4.035615969  | 6.073654487  | 1.997577452  |
| 51116 | 5.758523395  | 6.1478061 | 5.369240708  | 5.128763636  | 5.191222747  | 5.066304524  |
| 51117 | -0.352108471 | -0.352108 | -0.352108471 | 5.581973955  | 5.958359385  | 6.334744814  |
| 51118 | 9.135668534  | 7.4207556 | 8.278212087  | 4.832674249  | 3.173186306  | 6.492162193  |
| 51119 | 3.637822277  | 3.5151412 | 3.392460195  | 5.088251181  | 6.063716272  | 5.575983727  |
| 51121 | -0.352108471 | -0.352108 | -0.352108471 | 7.504356555  | 6.682822443  | 5.861288331  |
| 51123 | 8.880300252  | 6.2420483 | 3.603796306  | 4.890362278  | 6.087644454  | 7.284926631  |
| 51124 | -0.352108471 | -0.352108 | -0.352108471 | 6.067944725  | 4.670719452  | 5.369332089  |
| 51126 | -0.352108471 | -0.352108 | -0.352108471 | 6.927548141  | 6.32531018   | 5.72307222   |
| 51128 | 10.09875553  | 9.2601109 | 8.421466364  | 7.490655993  | 5.925540989  | 9.055770997  |
| 51131 | 4.983878974  | 3.8508272 | 4.417353062  | 8.206868105  | 6.943908403  | 5.680948702  |

|       |              |           |              |              |              |              |
|-------|--------------|-----------|--------------|--------------|--------------|--------------|
| 51132 | 8.942557916  | 7.9757892 | 7.009020494  | 8.50643431   | 3.946179484  | 6.226306897  |
| 51133 | 9.089264964  | 6.0275287 | 7.558396831  | 5.789762726  | 5.924051489  | 5.655473963  |
| 51135 | 7.933246481  | 9.2698371 | 6.596655885  | 4.523055044  | 6.194255311  | 2.851854777  |
| 51138 | 8.095767591  | 4.8315822 | 6.463674915  | 6.32597821   | 5.704335255  | 5.082692299  |
| 51142 | 7.160144567  | 7.2691536 | 7.378162675  | 9.916675497  | 7.15770761   | 4.398739723  |
| 51143 | 6.837680934  | 5.3531522 | 8.322209653  | 4.76286975   | 7.88775061   | 6.32531018   |
| 51148 | 2.375336938  | 1.8802386 | 1.385140197  | 9.784059907  | 8.18491552   | 6.585771133  |
| 51149 | -0.352108471 | -0.352108 | -0.352108471 | 6.000222335  | 5.775231583  | 6.225213087  |
| 51150 | 5.775231583  | 5.7752316 | 5.775231583  | 5.980334028  | 6.002308672  | 5.958359385  |
| 51154 | -0.352108471 | -0.352108 | -0.352108471 | 8.278098816  | 4.376584435  | 6.327341626  |
| 51155 | 5.428393874  | 7.5324736 | 3.324314191  | 6.439080015  | 7.387897781  | 6.913488898  |
| 51157 | 7.51917757   | 6.0182774 | 9.020077695  | 8.189559484  | 7.783514883  | 7.986537183  |
| 51160 | 5.671162933  | 8.0736673 | 6.872415104  | 4.295558047  | 4.927679215  | 5.559800383  |
| 51163 | 6.492539081  | 2.6021473 | 4.547343177  | 0.808855576  | 0.808855576  | 0.808855576  |
| 51164 | -0.352108471 | -0.352108 | -0.352108471 | 4.178899946  | 4.245214285  | 4.112585606  |
| 51166 | 6.369156591  | 6.3831515 | 6.355161685  | -0.352108471 | -0.352108471 | -0.352108471 |
| 51168 | 7.762619187  | 4.3855143 | 6.074066758  | -0.352108471 | -0.352108471 | -0.352108471 |
| 51172 | 2.313941724  | 4.9799919 | -0.352108471 | -0.352108471 | -0.352108471 | -0.352108471 |
| 51174 | 7.658222527  | 9.02866   | 6.287785086  | 5.687593236  | 5.440342203  | 5.56396772   |
| 51177 | -0.352108471 | -0.352108 | -0.352108471 | 8.797874287  | 6.625595045  | 4.453315803  |
| 51181 | -0.352108471 | -0.352108 | -0.352108471 | 5.663737322  | 5.403166952  | 5.924307691  |
| 51182 | 6.444762452  | 5.5056377 | 4.566512853  | 5.362907068  | 5.784960503  | 6.207013938  |
| 51185 | -0.352108471 | -0.352108 | -0.352108471 | 5.017136436  | 3.520516721  | 6.513756151  |
| 51186 | -0.198099909 | 8.2301915 | 4.016045771  | 5.760537073  | 4.998688579  | 6.522385566  |
| 51188 | -0.352108471 | -0.352108 | -0.352108471 | 6.414848889  | 7.025892365  | 6.720370627  |
| 51196 | 6.417642846  | 6.9820481 | 7.546453331  | 3.015521513  | 6.383151496  | -0.352108471 |
| 51198 | -0.352108471 | -0.352108 | -0.352108471 | 5.657665837  | 5.08099834   | 5.369332089  |
| 51199 | 8.552475495  | 5.8001998 | 3.04792408   | -0.352108471 | -0.352108471 | -0.352108471 |
| 51200 | 4.640023572  | 3.9130675 | 5.366979609  | 5.953079284  | 6.335196408  | 6.717313532  |
| 51202 | 6.438837895  | 5.3617469 | 5.90029238   | 5.284974356  | 5.656157877  | 4.913790835  |
| 51203 | -0.352108471 | -0.352108 | -0.352108471 | 3.030666647  | 5.789762726  | 8.548858805  |
| 51204 | -0.352108471 | -0.352108 | -0.352108471 | 2.75880335   | 2.049256654  | 1.339709957  |
| 51206 | 2.089114519  | 5.2752485 | 3.682181533  | 2.18071281   | 6.414739587  | 4.297726199  |
| 51218 | -0.352108471 | -0.352108 | -0.352108471 | 5.515939194  | 6.528162656  | 6.022050925  |
| 51222 | 4.669448073  | 6.7052875 | 8.74112695   | -0.352108471 | -0.352108471 | -0.352108471 |
| 51226 | -0.352108471 | -0.352108 | -0.352108471 | 6.004055887  | 6.895440991  | 7.786826095  |
| 51228 | 7.944557904  | 8.2932379 | 8.641917884  | 11.11719353  | 7.863969603  | 4.610745681  |
| 51230 | 6.465504752  | 5.5533016 | 6.009403184  | 5.038712954  | 6.230935805  | 5.63482438   |
| 51232 | 7.923357374  | 9.5526506 | 8.738004005  | 4.571342734  | 8.032716566  | 11.4940904   |
| 51234 | -0.352108471 | -0.352108 | -0.352108471 | 8.103562579  | 4.008545419  | 6.056053999  |
| 51236 | 6.674128879  | 6.7163061 | 6.63195166   | 5.117338506  | 6.497336045  | 7.877333584  |
| 51241 | -0.352108471 | -0.352108 | -0.352108471 | 1.492819042  | 3.337746555  | -0.352108471 |
| 51246 | -0.352108471 | -0.352108 | -0.352108471 | 10.69472539  | 5.554186394  | 8.124455894  |
| 51250 | 6.472179624  | 5.4884884 | 5.980334028  | 5.789762726  | 6.172815652  | 5.4067098    |
| 51253 | 5.800199788  | 5.825168  | 5.775231583  | 5.821410838  | 5.825167992  | 5.817653684  |
| 51255 | 6.815766583  | 4.0970484 | 5.456407505  | -0.352108471 | -0.352108471 | -0.352108471 |
| 51256 | -0.352108471 | -0.352108 | -0.352108471 | 4.178899946  | 4.245214285  | 4.112585606  |

|       |              |           |              |              |              |              |
|-------|--------------|-----------|--------------|--------------|--------------|--------------|
| 51257 | -0.352108471 | -0.352108 | -0.352108471 | 7.67825419   | 5.958359385  | 4.238464579  |
| 51258 | 6.049371728  | 8.5506032 | 7.299987458  | 7.973504604  | 8.39909175   | 8.824678896  |
| 51260 | 6.632910846  | 5.6886226 | 4.744334448  | -0.352108471 | -0.352108471 | -0.352108471 |
| 51264 | 4.563315445  | 7.6165612 | 6.089938313  | 6.154267535  | 6.53628338   | 6.345275458  |
| 51268 | 5.708307224  | 7.5908015 | 3.825812906  | 5.38675695   | 6.610539552  | 4.162974349  |
| 51271 | 5.688622647  | 5.7155573 | 5.661687951  | 7.357359337  | 7.3720224    | 7.342696275  |
| 51272 | 3.152579374  | 5.6772397 | 8.201899984  | 6.633361894  | 7.515917946  | 8.398473998  |
| 51278 | 6.090808341  | 7.280263  | 4.901353723  | 0.624614178  | 0.808855576  | 0.440372779  |
| 51279 | 5.520712498  | 5.0422071 | 5.999217859  | 4.586443407  | 9.039677357  | 6.813060382  |
| 51280 | 4.615583513  | 4.5318733 | 4.699293772  | 7.174377708  | 6.349064641  | 5.523751573  |
| 51281 | 6.212536209  | 5.8643707 | 6.560701765  | -0.352108471 | -0.352108471 | -0.352108471 |
| 51282 | 3.464585346  | 5.6239374 | 4.544261391  | 9.026053403  | 6.025999089  | 7.526026246  |
| 51283 | 5.625160771  | 5.6532998 | 5.597021732  | 5.903760504  | 5.926961306  | 5.880559702  |
| 51284 | 7.687113844  | 7.4131685 | 7.550141174  | 6.260835661  | 6.098297717  | 6.423373606  |
| 51285 | 6.766242362  | 4.7325619 | 5.749402114  | -0.352108471 | -0.352108471 | -0.352108471 |
| 51287 | 3.515141236  | 3.2804088 | 3.749873645  | 5.630272544  | 7.348693229  | 9.067113913  |
| 51289 | 6.804144622  | 5.9341686 | 6.369156591  | -0.352108471 | -0.352108471 | -0.352108471 |
| 51290 | -0.352108471 | -0.352108 | -0.352108471 | 4.610601178  | 5.821410838  | 7.032220498  |
| 51292 | 6.264668196  | 6.7357797 | 7.206891176  | 7.469464088  | 5.821410838  | 4.173357588  |
| 51293 | -0.352108471 | -0.352108 | -0.352108471 | 8.674916953  | 6.611364719  | 7.643140836  |
| 51294 | -0.352108471 | -0.352108 | -0.352108471 | 5.529311366  | 5.417906901  | 5.64071583   |
| 51295 | -0.352108471 | -0.352108 | -0.352108471 | 5.663737322  | 5.665786693  | 5.661687951  |
| 51299 | -0.352108471 | -0.352108 | -0.352108471 | 3.119148782  | 3.322933285  | 2.915364278  |
| 51306 | 6.439963118  | 7.3777551 | 8.315547149  | -0.352108471 | -0.352108471 | -0.352108471 |
| 51311 | 7.044627223  | 6.9389629 | 6.991795048  | -0.352108471 | -0.352108471 | -0.352108471 |
| 51312 | -0.352108471 | -0.352108 | -0.352108471 | 4.716755351  | 7.243912706  | 5.980334028  |
| 51315 | -0.352108471 | -0.352108 | -0.352108471 | 5.095423988  | 5.124543452  | 5.066304524  |
| 51316 | 6.906139814  | 6.2588342 | 5.611528576  | 7.763592     | 5.784960503  | 3.806329006  |
| 51317 | -0.352108471 | -0.352108 | -0.352108471 | 6.755008001  | 7.994443751  | 7.374725876  |
| 51320 | -0.352108471 | -0.352108 | -0.352108471 | 10.2205435   | 6.497182024  | 2.77382055   |
| 51321 | 6.910067869  | 7.2227716 | 7.06641971   | -0.352108471 | -0.352108471 | -0.352108471 |
| 51322 | 4.780916268  | 5.5873867 | 5.184151491  | 6.056053999  | 4.342506257  | 7.769601741  |
| 51324 | -0.352108471 | -0.352108 | -0.352108471 | 5.067718723  | 8.04566108   | 6.556689902  |
| 51329 | 3.752410772  | 6.1416036 | 4.947007189  | -0.352108471 | -0.352108471 | -0.352108471 |
| 51330 | 8.271904178  | 8.3775056 | 8.166302741  | 8.719522258  | 9.701745762  | 7.737298753  |
| 51332 | 6.294373215  | 4.806726  | 5.550549618  | -0.352108471 | -0.352108471 | -0.352108471 |
| 51333 | 5.093708821  | 5.4283939 | 5.763078928  | -0.352108471 | -0.352108471 | -0.352108471 |
| 51335 | -0.352108471 | -0.352108 | -0.352108471 | 6.913448327  | 6.946414218  | 6.880482436  |
| 51341 | -0.352108471 | -0.352108 | -0.352108471 | 5.729130667  | 5.668425445  | 5.607720223  |
| 51343 | 5.651764351  | 5.3835036 | 5.920025058  | -0.352108471 | -0.352108471 | -0.352108471 |
| 51351 | 6.055135433  | 5.4131985 | 6.697072349  | 6.248032091  | 4.983985071  | 3.719938051  |
| 51352 | -0.352108471 | -0.352108 | -0.352108471 | 6.763708171  | 6.39125838   | 6.577483275  |
| 51362 | 6.363762655  | 5.355158  | 7.372367313  | 6.032141459  | 6.793008544  | 5.271274375  |
| 51366 | -0.352108471 | -0.352108 | -0.352108471 | 2.099323895  | 2.147539136  | 2.051108653  |
| 51368 | -0.352108471 | -0.352108 | -0.352108471 | 4.444556497  | 7.472162272  | 5.958359385  |
| 51371 | -0.352108471 | -0.352108 | -0.352108471 | 7.038566468  | 5.605777824  | 8.471355112  |
| 51372 | 2.682175909  | 5.9489752 | 4.315575532  | 7.636511252  | 6.566821108  | 7.10166618   |

|       |              |           |              |              |              |              |
|-------|--------------|-----------|--------------|--------------|--------------|--------------|
| 51374 | 6.310712697  | 5.6251608 | 4.939608845  | 6.26758739   | 7.575129529  | 8.882671669  |
| 51377 | 1.90830372   | 1.9397461 | 1.876861374  | -0.352108471 | -0.352108471 | -0.352108471 |
| 51379 | 6.192528489  | 4.6938295 | 7.69122747   | 6.029379157  | 8.159314756  | 7.094346957  |
| 51380 | 6.216409359  | 5.4958944 | 6.936924363  | 1.825329981  | 1.549724107  | 2.100935855  |
| 51382 | 1.783698732  | -0.666961 | 4.234358003  | 4.206547363  | 3.119148782  | 2.0317502    |
| 51386 | 7.396926017  | 8.6555085 | 6.138343513  | 8.726299413  | 8.089528252  | 7.45275709   |
| 51388 | 4.464976357  | 3.1463523 | 3.805664353  | 6.08682898   | 8.890444016  | 3.283213944  |
| 51389 | 1.93748006   | 3.2986358 | 2.618057952  | 8.287323812  | 5.446142271  | 6.866733042  |
| 51390 | 5.852937462  | 7.0991064 | 4.606768555  | -0.352108471 | -0.352108471 | -0.352108471 |
| 51393 | 2.741060894  | 0.0431576 | 1.392109249  | 2.547414545  | 4.622828057  | 3.585121301  |
| 51398 | 5.749402114  | 5.7752316 | 5.723572646  | 6.737448313  | 6.653870824  | 6.821025802  |
| 51399 | 5.415461631  | 5.8131109 | 6.210760241  | 5.088940933  | 5.574791066  | 6.060641199  |
| 51400 | 3.334031409  | 5.2849744 | 7.235917304  | 8.537212273  | 8.907361041  | 9.277509808  |
| 51406 | 4.016045771  | 4.6684689 | 3.363622691  | 7.286324647  | 8.013063162  | 6.559586132  |
| 51409 | 7.137727412  | 7.1464808 | 7.128974067  | -0.352108471 | -0.352108471 | -0.352108471 |
| 51421 | -0.352108471 | -0.352108 | -0.352108471 | 7.331272742  | 7.35252903   | 7.310016454  |
| 51422 | -0.352108471 | -0.352108 | -0.352108471 | 6.963991695  | 3.977248458  | 9.950734931  |
| 51426 | -0.352108471 | -0.352108 | -0.352108471 | 7.29572006   | 5.470026894  | 6.382873477  |
| 51428 | -0.352108471 | -0.352108 | -0.352108471 | 5.169157826  | 8.366069546  | 1.972246105  |
| 51429 | -0.352108471 | -0.352108 | -0.352108471 | 6.104429468  | 3.973347116  | 8.235511819  |
| 51430 | 4.89956404   | 5.062887  | 5.226209947  | -0.352108471 | -0.352108471 | -0.352108471 |
| 51433 | -0.352108471 | -0.352108 | -0.352108471 | 5.489764936  | 7.012304751  | 6.251034844  |
| 51434 | -0.352108471 | -0.352108 | -0.352108471 | 3.119148782  | 3.119148782  | 3.119148782  |
| 51435 | -0.352108471 | -0.352108 | -0.352108471 | 5.290303242  | 6.022050925  | 6.753798609  |
| 51440 | -0.352108471 | -0.352108 | -0.352108471 | 4.456886199  | 4.482692559  | 4.43107984   |
| 51441 | -0.352108471 | -0.352108 | -0.352108471 | 7.511984635  | 5.47633612   | 3.440687606  |
| 51444 | 6.124947903  | 6.502263  | 6.879578154  | -0.352108471 | -0.352108471 | -0.352108471 |
| 51449 | 4.979991919  | 4.2205765 | 5.739407335  | 5.577939858  | 7.024738766  | 8.471537674  |
| 51455 | -0.352108471 | -0.352108 | -0.352108471 | 5.923493182  | 5.926961306  | 5.920025058  |
| 51458 | -0.352108471 | -0.352108 | -0.352108471 | 1.560761548  | 2.191310813  | 0.930212283  |
| 51465 | 4.431473802  | 6.3968684 | 8.362262963  | -0.352108471 | -0.352108471 | -0.352108471 |
| 51473 | 3.458535395  | 4.7552401 | 6.051944835  | 0.440372779  | 0.440372779  | 0.440372779  |
| 51474 | 7.08718283   | 7.0988366 | 7.075529067  | 7.196717237  | 7.429168474  | 7.661619712  |
| 51478 | 5.670784109  | 5.3858055 | 5.528294812  | -0.352108471 | -0.352108471 | -0.352108471 |
| 51479 | -0.352108471 | -0.352108 | -0.352108471 | 8.097572983  | 5.16611952   | 6.631846251  |
| 51493 | 2.84317252   | 6.0384535 | -0.352108471 | 5.789762726  | 2.577576166  | 9.001949286  |
| 51495 | 4.319641631  | 6.0203811 | 7.721120552  | 5.939192221  | 3.861464771  | 8.016919672  |
| 51497 | 7.489189205  | 5.9002924 | 4.311395555  | 8.63438663   | 6.693937107  | 4.753487584  |
| 51499 | -0.352108471 | -0.352108 | -0.352108471 | 7.204588172  | 6.903642175  | 6.602696177  |
| 51501 | -0.352108471 | -0.352108 | -0.352108471 | 5.338185733  | 5.775231583  | 4.901139884  |
| 51504 | 8.335225499  | 8.8394758 | 7.830975233  | 6.883638803  | 8.975801101  | 7.929719952  |
| 51506 | 7.496451613  | 6.9675112 | 6.438570877  | 6.630621079  | 7.174857204  | 6.086384954  |
| 51507 | 8.044082269  | 8.1175462 | 8.191010166  | 7.384775166  | 6.911873916  | 7.857676415  |
| 51510 | -0.352108471 | -0.352108 | -0.352108471 | 6.859217306  | 4.47248144   | 9.245953171  |
| 51512 | -0.352108471 | -0.352108 | -0.352108471 | 4.477947052  | 4.843308497  | 4.112585606  |
| 51514 | -0.352108471 | -0.352108 | -0.352108471 | 5.441168403  | 5.704335255  | 5.967502107  |
| 51522 | -0.352108471 | -0.352108 | -0.352108471 | 5.227920761  | 6.396868383  | 7.565816004  |

|       |              |           |              |              |              |              |
|-------|--------------|-----------|--------------|--------------|--------------|--------------|
| 51523 | -0.352108471 | -0.352108 | -0.352108471 | 8.482967602  | 5.454747476  | 6.968857539  |
| 51526 | -0.352108471 | -0.352108 | -0.352108471 | 5.263851904  | 2.739473082  | 7.788230727  |
| 51527 | -0.352108471 | -0.352108 | -0.352108471 | 4.927679215  | 4.954218546  | 4.901139884  |
| 51528 | -0.352108471 | -0.352108 | -0.352108471 | 5.880139475  | 6.123478787  | 6.001809131  |
| 51529 | 4.46201997   | 5.8242888 | 7.1865576    | 6.854064725  | 6.299485234  | 5.744905742  |
| 51534 | 6.183964016  | 5.4207502 | 6.947177815  | 7.900808028  | 7.209478834  | 6.51814964   |
| 51535 | -0.352108471 | -0.352108 | -0.352108471 | 2.405260623  | 4.559699198  | 6.714137774  |
| 51538 | -0.352108471 | -0.352108 | -0.352108471 | 4.220283075  | 4.137516816  | 4.178899946  |
| 51547 | 4.724115311  | 6.2570463 | 7.789977374  | -0.352108471 | -0.352108471 | -0.352108471 |
| 51552 | 6.681051616  | 5.9391922 | 5.197332827  | 7.177494894  | 5.473125466  | 6.32531018   |
| 51559 | 6.299246806  | 7.4168895 | 8.53453219   | 7.57577737   | 6.637066482  | 5.698355594  |
| 51564 | 5.89921589   | 7.7633625 | 6.831289207  | 6.310616139  | 7.408390712  | 6.859503426  |
| 51566 | 6.124708376  | 6.183964  | 6.243219655  | 5.845499835  | 5.873345987  | 5.817653684  |
| 51567 | 9.749922359  | 8.0204997 | 6.291077106  | 4.870983156  | 6.29836953   | 5.584676343  |
| 51569 | 6.167582836  | 6.1999612 | 6.135204448  | 6.631846251  | 6.653870824  | 6.609821679  |
| 51573 | 8.305972041  | 3.9370855 | 6.121528769  | 4.625564325  | 5.325716078  | 6.025867831  |
| 51582 | 7.629370509  | 7.9496204 | 8.269870368  | -0.352108471 | -0.352108471 | -0.352108471 |
| 51585 | -0.352108471 | -0.352108 | -0.352108471 | 5.712263427  | 5.731413688  | 5.693113166  |
| 51586 | 6.055584097  | 7.518684  | 6.787134073  | 7.222915496  | 9.466702048  | 8.344808772  |
| 51588 | 4.340479165  | 7.0367661 | 5.688622647  | 7.233079593  | 6.631846251  | 6.030612909  |
| 51593 | -0.352108471 | -0.352108 | -0.352108471 | 5.800199788  | 2.970807742  | 8.629591833  |
| 51594 | 2.553073296  | 2.5977509 | 2.508395726  | 6.007585277  | 5.319889366  | 5.663737322  |
| 51596 | 7.094863006  | 5.5120595 | 6.303461245  | 7.971540778  | 8.950754778  | 8.461147778  |
| 51599 | -0.352108471 | -0.352108 | -0.352108471 | 5.704335255  | 7.633216076  | 3.775454434  |
| 51601 | 6.121528769  | 6.1414231 | 6.101634422  | 0.044132154  | 0.440372779  | -0.352108471 |
| 51602 | 7.212932128  | 7.0167764 | 6.820620706  | 8.791943322  | 6.750169956  | 7.771056639  |
| 51605 | -0.352108471 | -0.352108 | -0.352108471 | 5.859617369  | 5.421329723  | 6.297905015  |
| 51608 | -0.352108471 | -0.352108 | -0.352108471 | 5.388370172  | 5.421579811  | 5.355160532  |
| 51614 | 4.434314669  | 4.4826926 | 4.385936778  | 6.77374078   | 6.788420481  | 6.759061079  |
| 51619 | 6.103083059  | 4.6061791 | 5.35463107   | 1.437859363  | 1.437859363  | 1.437859363  |
| 51626 | -0.352108471 | -0.352108 | -0.352108471 | 3.767483207  | 3.615460478  | 3.919505936  |
| 51629 | 6.714613543  | 6.2899125 | 6.502263028  | 7.129313784  | 6.963975544  | 7.294652023  |
| 51635 | -0.352108471 | -0.352108 | -0.352108471 | 5.860389288  | 6.631846251  | 7.403303215  |
| 51637 | 6.2064191    | 8.831936  | 7.51917757   | 7.565391169  | 6.724665022  | 5.883938874  |
| 51639 | -0.352108471 | -0.352108 | -0.352108471 | 5.284974356  | 5.315258837  | 5.254689875  |
| 51643 | 2.989802693  | 7.7989826 | 5.394392653  | 3.792182502  | 6.714299082  | 5.253240792  |
| 51645 | -0.352108471 | -0.352108 | -0.352108471 | 5.631432108  | 7.506886071  | 6.56915909   |
| 51646 | 3.003655834  | 6.3823224 | 4.692989119  | 8.113000316  | 7.224139774  | 6.335279232  |
| 51647 | 4.176758563  | 4.923857  | 4.550307802  | 6.880832995  | 6.876579765  | 6.872326536  |
| 51651 | 6.705287512  | 7.5902131 | 5.820361896  | -0.352108471 | -0.352108471 | -0.352108471 |
| 51657 | -0.352108471 | -0.352108 | -0.352108471 | 4.171955224  | 7.25257163   | 5.712263427  |
| 51659 | 5.437440043  | 5.7043353 | 5.971230467  | -0.352108471 | -0.352108471 | -0.352108471 |
| 51660 | 5.089412202  | 3.9992132 | 6.179611183  | -0.352108471 | -0.352108471 | -0.352108471 |
| 51661 | 1.783698732  | 3.9195059 | -0.352108471 | 5.859617369  | 4.058585122  | 7.660649616  |
| 51663 | 7.789324397  | 6.4136577 | 7.101491044  | 0.808855576  | 0.808855576  | 0.808855576  |
| 51665 | 1.383520155  | -0.352108 | 3.119148782  | 5.886425029  | 5.926961306  | 5.845888751  |
| 51666 | 2.486879591  | -0.352108 | 5.325867653  | -0.352108471 | -0.352108471 | -0.352108471 |

|       |              |           |              |              |              |              |
|-------|--------------|-----------|--------------|--------------|--------------|--------------|
| 51667 | -0.352108471 | -0.352108 | -0.352108471 | 5.88700099   | 7.338600665  | 4.435401315  |
| 51669 | -0.352108471 | -0.352108 | -0.352108471 | 6.886610445  | 6.068977539  | 7.704243351  |
| 51678 | 4.449748927  | 4.9799919 | 3.919505936  | 6.115657815  | 6.073654487  | 6.157661143  |
| 51684 | 2.479453761  | 8.5081127 | 5.493783215  | 4.27890488   | 8.052836332  | 6.165870606  |
| 51693 | 6.801813774  | 6.2660669 | 7.337560692  | 5.538722293  | 6.149337851  | 6.759953409  |
| 51699 | -0.352108471 | -0.352108 | -0.352108471 | 6.022050925  | 6.544096941  | 5.500004909  |
| 51702 | 5.641106521  | 3.6711761 | 7.611036934  | -0.352108471 | -0.352108471 | -0.352108471 |
| 51714 | -0.352108471 | -0.352108 | -0.352108471 | 9.535112267  | 6.296043865  | 3.056975463  |
| 51715 | -0.352108471 | -0.352108 | -0.352108471 | 2.169424975  | 2.191310813  | 2.147539136  |
| 51720 | -0.352108471 | -0.352108 | -0.352108471 | 2.039485684  | -0.352108471 | 4.43107984   |
| 51725 | 5.185586761  | 5.3050787 | 5.066094857  | 1.644875323  | 1.14221151   | 2.147539136  |
| 51726 | 7.016776417  | 7.0229788 | 7.010573985  | 5.575983727  | 5.588224375  | 5.563743079  |
| 51727 | 6.056053999  | 6.0736545 | 6.038453511  | 1.427477396  | 1.549724107  | 1.305230684  |
| 51728 | -0.352108471 | -0.352108 | -0.352108471 | 3.119148782  | 3.119148782  | 3.119148782  |
| 51729 | 6.640019393  | 6.6538708 | 6.626167961  | -0.352108471 | -0.352108471 | -0.352108471 |
| 51747 | 1.66985715   | -0.352108 | 3.69182277   | 9.992481445  | 3.335774932  | 6.664128189  |
| 51752 | 5.649551807  | 6.7052875 | 7.761023217  | -0.352108471 | -0.352108471 | -0.352108471 |
| 51755 | 4.513304033  | 4.1125856 | 4.914022459  | 4.49290523   | 3.919505936  | 5.066304524  |
| 51759 | 5.123761479  | 7.1135257 | 3.133997254  | 7.851250602  | 6.668865983  | 5.486481363  |
| 51763 | 2.16755883   | 2.6715554 | 2.419557138  | 6.187786833  | 5.987502076  | 6.087644454  |
| 51768 | 10.33983763  | 6.6580618 | 8.498949707  | 7.319460441  | 8.73961392   | 8.029537181  |
| 51773 | -0.352108471 | -0.352108 | -0.352108471 | 6.434644758  | 5.486363508  | 7.382926008  |
| 51776 | 5.51959128   | 5.3371965 | 5.428393874  | 1.90830372   | 1.939746065  | 1.876861374  |
| 51780 | 5.591305588  | 2.7774933 | 8.40511789   | 0.044132154  | -0.352108471 | 0.440372779  |
| 51804 | 8.324270279  | 8.1370816 | 8.511458909  | 6.859246472  | 6.873503784  | 6.844989161  |
| 51805 | -0.352108471 | -0.352108 | -0.352108471 | 1.999631788  | 2.191310813  | 1.807952763  |
| 51808 | 7.639063299  | 5.8022074 | 9.475919233  | 11.5068171   | 4.17269669   | 7.839756893  |
| 51809 | -0.352108471 | -0.352108 | -0.352108471 | 3.585121301  | 3.918291565  | 3.251951037  |
| 51816 | 6.873791272  | 6.8289675 | 6.918615007  | 4.362857055  | 6.709020222  | 9.055183389  |
| 53339 | -0.352108471 | -0.352108 | -0.352108471 | 1.162206581  | 1.666761161  | 2.171315742  |
| 53340 | -0.352108471 | -0.352108 | -0.352108471 | 5.704335255  | 5.715557343  | 5.693113166  |
| 53342 | -0.352108471 | -0.352108 | -0.352108471 | 4.953627254  | 6.12990004   | 7.306172826  |
| 53344 | -0.352108471 | -0.352108 | -0.352108471 | 2.019412013  | 1.873693801  | 1.946552907  |
| 53349 | -0.352108471 | -0.352108 | -0.352108471 | 5.458255064  | 5.16916214   | 5.747347988  |
| 53353 | -0.352108471 | -0.352108 | -0.352108471 | 4.207628449  | 4.80208491   | 5.396541371  |
| 53354 | 6.847646477  | 6.0388597 | 5.2300729    | 7.994564784  | 6.392769641  | 4.790974498  |
| 53358 | -0.352108471 | -0.352108 | -0.352108471 | 4.374271398  | 5.923493182  | 7.472714967  |
| 53615 | 5.939192221  | 5.9583594 | 5.920025058  | 7.695010698  | 7.617484963  | 7.772536433  |
| 53635 | 5.609202143  | 6.9286216 | 4.289782714  | 7.348035589  | 5.871050458  | 6.609543024  |
| 53820 | 4.979991919  | 5.7202413 | 4.239742497  | 1.218975116  | 0.440372779  | 1.997577452  |
| 53827 | 8.468173444  | 7.7920339 | 7.115894405  | 8.435596219  | 4.999603189  | 11.87158925  |
| 53834 | 5.439805394  | 5.3972911 | 5.354776768  | 6.479260377  | 5.567182839  | 7.391337914  |
| 53838 | 7.468260011  | 7.4939952 | 7.442524773  | 6.77374078   | 6.788420481  | 6.759061079  |
| 53841 | -0.352108471 | -0.352108 | -0.352108471 | 3.385478649  | 7.265953507  | 5.325716078  |
| 53844 | 6.317834233  | 6.3439771 | 6.291691359  | -0.352108471 | -0.352108471 | -0.352108471 |
| 53917 | -0.352108471 | -0.352108 | -0.352108471 | 2.879347611  | 6.434644758  | 9.989941906  |
| 53938 | -0.352108471 | -0.352108 | -0.352108471 | 5.972179095  | 5.835528372  | 5.698877648  |



|       |              |           |              |              |              |              |
|-------|--------------|-----------|--------------|--------------|--------------|--------------|
| 53942 | -0.352108471 | -0.352108 | -0.352108471 | 4.925871155  | 6.56915909   | 8.212447024  |
| 53944 | 5.168965007  | 5.9856879 | 6.802410864  | 5.914903203  | 6.527456998  | 5.302349409  |
| 53981 | 6.352932756  | 7.4744473 | 5.231418187  | 7.933674328  | 7.952342287  | 7.91500637   |
| 54014 | 3.215228584  | 1.6126137 | 2.413921152  | -0.352108471 | -0.352108471 | -0.352108471 |
| 54020 | 5.354685649  | 5.2271959 | 5.48217543   | -0.352108471 | -0.352108471 | -0.352108471 |
| 54053 | -0.352108471 | -0.352108 | -0.352108471 | 7.677697856  | 3.200808737  | 5.439253296  |
| 54058 | 6.502263028  | 5.496584  | 7.507942042  | -0.352108471 | -0.352108471 | -0.352108471 |
| 54059 | -0.352108471 | -0.352108 | -0.352108471 | 5.017136436  | 5.146407029  | 4.887865842  |
| 54067 | 1.392109249  | 1.3760133 | 1.408205209  | 1.167362396  | 2.686833264  | -0.352108471 |
| 54107 | 5.863834306  | 3.4496011 | 4.656717726  | 6.383151496  | 4.746856317  | 8.019446675  |
| 54108 | 2.12618815   | 4.0160458 | 5.905903392  | 6.525683261  | 5.800199788  | 5.074716314  |
| 54149 | -0.352108471 | -0.352108 | -0.352108471 | 3.282392851  | 5.295431597  | 7.308470343  |
| 54165 | 2.860773008  | 2.0210917 | 3.700454289  | -0.352108471 | -0.352108471 | -0.352108471 |
| 54187 | -0.352108471 | -0.352108 | -0.352108471 | 5.939192221  | 5.705243906  | 6.173140537  |
| 54205 | 6.738859034  | 7.7131438 | 8.687428534  | 6.561123102  | 6.488990562  | 6.633255642  |
| 54206 | 4.426865312  | 4.7323714 | 4.579618372  | 0.689815323  | -0.352108471 | 1.731739118  |
| 54212 | 5.749402114  | 5.7752316 | 5.723572646  | -0.352108471 | -0.352108471 | -0.352108471 |
| 54361 | -0.352108471 | -0.352108 | -0.352108471 | 5.095423988  | 5.124543452  | 5.066304524  |
| 54407 | -0.352108471 | -0.352108 | -0.352108471 | 7.604813664  | 8.619042109  | 6.59058522   |
| 54431 | -0.352108471 | -0.352108 | -0.352108471 | 7.328554585  | 7.304001074  | 7.353108096  |
| 54434 | 7.651189583  | 7.7313381 | 7.57104105   | 7.599970365  | 7.507270991  | 7.692669739  |
| 54442 | 5.876783138  | 7.0505667 | 6.463674915  | 7.442587199  | 4.628131829  | 6.035359514  |
| 54443 | 6.212536209  | 5.8465643 | 6.578508075  | -0.499482893 | 4.316090332  | 1.90830372   |
| 54453 | 6.913488898  | 6.9268019 | 6.900175883  | 6.556689902  | 6.588465267  | 6.524914536  |
| 54455 | 4.089894112  | 7.5105055 | 5.800199788  | -0.352108471 | -0.352108471 | -0.352108471 |
| 54458 | 1.501017585  | -0.352108 | 3.354143641  | 7.780488171  | 7.797723886  | 7.763252455  |
| 54460 | 7.104901534  | 7.7168051 | 6.492998006  | 3.341452738  | 5.546459669  | 1.136445807  |
| 54461 | -0.352108471 | -0.352108 | -0.352108471 | 8.910662411  | 2.580126515  | 5.745394463  |
| 54462 | 5.101071723  | 5.5246135 | 5.948155185  | 7.386463326  | 6.68034224   | 5.974221154  |
| 54464 | 1.383520155  | -0.352108 | 3.119148782  | 3.000039162  | 3.218334491  | 2.781743832  |
| 54471 | 6.658244114  | 6.0480939 | 5.4379437    | 0.685292531  | 0.440372779  | 0.930212283  |
| 54472 | -0.352108471 | -0.352108 | -0.352108471 | 6.804723141  | 7.215455623  | 6.393990659  |
| 54476 | 5.573387224  | 4.9058738 | 4.238360373  | 6.684260862  | 5.876341455  | 6.280301159  |
| 54491 | 7.016776417  | 4.5437254 | 9.489827447  | 3.447055498  | 7.020079349  | 5.233567424  |
| 54495 | 5.839733082  | 6.4505296 | 6.145131319  | 4.977710418  | 4.485507002  | 5.469913833  |
| 54498 | -0.352108471 | -0.352108 | -0.352108471 | 0.593305467  | 2.208091219  | 1.400698343  |
| 54499 | 6.474992002  | 5.4856761 | 5.980334028  | 5.627079346  | 9.973041899  | 7.800060623  |
| 54502 | 5.242161786  | 5.7246682 | 6.207174638  | 4.752288804  | 7.985488211  | 6.368888508  |
| 54505 | 5.519508656  | 5.7585234 | 5.997538135  | 5.651086567  | 3.953083253  | 4.80208491   |
| 54507 | -0.352108471 | -0.352108 | -0.352108471 | 6.72865797   | 6.549852913  | 6.907463027  |
| 54509 | 5.681727979  | 5.5882244 | 5.775231583  | 3.41553996   | 4.954218546  | 1.876861374  |
| 54510 | -0.352108471 | -0.352108 | -0.352108471 | 6.397175529  | 4.74991884   | 8.044432218  |
| 54517 | 6.396868383  | 6.4105853 | 6.383151496  | -0.352108471 | -0.352108471 | -0.352108471 |
| 54518 | -0.352108471 | -0.352108 | -0.352108471 | 5.980334028  | 5.17497708   | 6.785690977  |
| 54522 | 4.498824301  | 6.6884613 | 5.593642802  | 3.733586426  | 2.462906036  | 3.098246231  |
| 54529 | -0.352108471 | -0.352108 | -0.352108471 | 3.48963174   | 8.982210582  | 6.235921161  |
| 54531 | 1.328643428  | 1.3921092 | 1.45557507   | 4.681934516  | 7.649806696  | 6.165870606  |

|       |              |           |              |              |              |              |
|-------|--------------|-----------|--------------|--------------|--------------|--------------|
| 54534 | 4.695524885  | 5.8744238 | 5.284974356  | -0.352108471 | -0.352108471 | -0.352108471 |
| 54535 | -0.352108471 | -0.352108 | -0.352108471 | 4.456886199  | 5.089866335  | 3.823906064  |
| 54539 | 7.533336972  | 6.3402385 | 8.726435421  | 5.169157826  | 6.398706384  | 3.939609267  |
| 54540 | -0.352108471 | -0.352108 | -0.352108471 | 6.022050925  | 5.789830958  | 6.254270892  |
| 54543 | 5.749402114  | 5.7752316 | 5.723572646  | 7.535634638  | 7.555244212  | 7.516025064  |
| 54545 | 2.946665475  | 6.2730965 | 9.599527545  | 1.493791735  | 1.437859363  | 1.549724107  |
| 54552 | 5.559971507  | 6.6638531 | 4.456089877  | 5.663737322  | 5.710679745  | 5.616794898  |
| 54553 | 5.980334028  | 6.0023087 | 5.958359385  | -0.352108471 | -0.352108471 | -0.352108471 |
| 54554 | 4.259723664  | 3.6761388 | 4.843308497  | 1.678838435  | 1.549724107  | 1.807952763  |
| 54555 | 7.924897654  | 6.0876445 | 4.250391255  | 4.466776131  | 1.771521433  | 3.119148782  |
| 54581 | 4.036988101  | 3.0016666 | 3.519327359  | 6.164526205  | 7.098778816  | 5.230273595  |
| 54583 | -0.352108471 | -0.352108 | -0.352108471 | 3.228447668  | 4.201291885  | 2.255603452  |
| 54587 | 6.477478606  | 9.0072731 | 7.742375865  | 8.489516008  | 9.032811303  | 8.761163655  |
| 54596 | 8.399602453  | 8.2516288 | 8.547576081  | 7.610066037  | 7.578336491  | 7.641795584  |
| 54602 | -0.352108471 | -0.352108 | -0.352108471 | 6.806422367  | 4.668813097  | 8.944031638  |
| 54619 | -0.352108471 | -0.352108 | -0.352108471 | 6.087644454  | 4.202289312  | 7.972999597  |
| 54622 | 6.24650753   | 7.932453  | 4.560562031  | -0.352108471 | -0.352108471 | -0.352108471 |
| 54623 | -0.352108471 | -0.352108 | -0.352108471 | 6.79867074   | 8.53521005   | 5.06213143   |
| 54626 | 6.073062111  | 5.8445235 | 6.301600732  | 4.591429197  | 4.04957035   | 3.507711504  |
| 54627 | 4.246107069  | 5.3546856 | 6.463264229  | -0.352108471 | -0.352108471 | -0.352108471 |
| 54629 | 5.647557376  | 6.8564204 | 6.251988912  | 6.874544191  | 6.209684281  | 6.542114236  |
| 54662 | 5.800199788  | 4.2225901 | 7.377809459  | 8.481477505  | 7.19609887   | 5.910720235  |
| 54663 | -0.352108471 | -0.352108 | -0.352108471 | 5.823032532  | 5.859617369  | 5.896202206  |
| 54674 | -0.352108471 | -0.352108 | -0.352108471 | 5.663737322  | 6.827700861  | 4.499773783  |
| 54675 | -0.352108471 | -0.352108 | -0.352108471 | 7.675322316  | 5.368419324  | 3.061516331  |
| 54676 | 2.771630448  | 3.2452353 | 3.718840162  | 3.466485722  | 4.178899946  | 4.891314169  |
| 54680 | -0.352108471 | -0.352108 | -0.352108471 | 6.12522053   | 5.614110498  | 5.869665514  |
| 54700 | 7.286324647  | 7.2952014 | 7.277447884  | -0.352108471 | -0.352108471 | -0.352108471 |
| 54708 | 5.800214613  | 7.3477234 | 6.573968999  | 7.1273692    | 3.861465154  | 5.494417177  |
| 54715 | -0.352108471 | -0.352108 | -0.352108471 | 5.16766094   | 5.402287772  | 5.284974356  |
| 54716 | 3.972745827  | 4.6049907 | 5.23723563   | 5.670931515  | 4.612241674  | 6.729621355  |
| 54729 | 4.366177319  | 6.068805  | 5.217491139  | -0.352108471 | -0.352108471 | -0.352108471 |
| 54732 | 5.529311366  | 5.5293114 | 5.529311366  | 7.492234695  | 7.414576987  | 7.569892404  |
| 54737 | 5.84855283   | 5.9531359 | 6.057719069  | 1.937219413  | 2.042663021  | 1.831775805  |
| 54739 | 7.750076311  | 11.579072 | 3.921080731  | 5.944844995  | 6.370559697  | 5.519130292  |
| 54741 | 5.665360006  | 5.8942521 | 6.123144253  | 4.96203345   | 10.07589668  | 7.518965064  |
| 54749 | -0.352108471 | -0.352108 | -0.352108471 | 5.88700099   | 5.893442277  | 5.880559702  |
| 54751 | 9.180742539  | 9.2133332 | 9.245923919  | 8.015966417  | 7.148091733  | 8.883841101  |
| 54752 | -0.352108471 | -0.352108 | -0.352108471 | 6.25450531   | 5.050655725  | 3.84680614   |
| 54753 | 4.099150854  | 6.4755755 | 5.287363196  | -0.352108471 | -0.352108471 | -0.352108471 |
| 54758 | 0.17320027   | 5.0629156 | 2.618057952  | -0.352108471 | -0.352108471 | -0.352108471 |
| 54764 | -0.352108471 | -0.352108 | -0.352108471 | 0.793818797  | -0.352108471 | 1.939746065  |
| 54765 | 5.493783215  | 5.8282527 | 5.159313761  | 5.017136436  | 4.484799241  | 5.54947363   |
| 54768 | 3.6661225    | 2.8431725 | 2.02022254   | -0.352108471 | -0.352108471 | -0.352108471 |
| 54776 | 6.831289207  | 6.8453896 | 6.817188811  | 6.104429468  | 6.135204448  | 6.073654487  |
| 54784 | 5.959506607  | 6.0384535 | 5.880559702  | 0.044132154  | 0.440372779  | -0.352108471 |
| 54788 | 5.978718296  | 6.1075388 | 6.236359307  | 6.305009645  | 7.840024054  | 7.07251685   |

|       |              |           |              |              |              |              |
|-------|--------------|-----------|--------------|--------------|--------------|--------------|
| 54793 | 6.414258136  | 4.47463   | 8.353886312  | 5.344765918  | 6.915034162  | 6.12990004   |
| 54795 | 5.175308152  | 5.3517823 | 5.528256413  | 6.616314976  | 6.266367194  | 5.916419412  |
| 54798 | -0.352108471 | -0.352108 | -0.352108471 | 4.852072611  | 1.639179101  | 3.245625856  |
| 54802 | -0.352108471 | -0.352108 | -0.352108471 | 7.024005522  | 7.054600764  | 7.085196007  |
| 54805 | 6.396868383  | 4.8531383 | 7.940598432  | -0.352108471 | -0.352108471 | -0.352108471 |
| 54810 | 6.861057494  | 6.4891004 | 7.233014576  | -0.352108471 | -0.352108471 | -0.352108471 |
| 54811 | 4.478932971  | 4.3878341 | 4.433383511  | 2.600631006  | -0.277213399 | 5.478475412  |
| 54812 | -0.352108471 | -0.352108 | -0.352108471 | 5.186168792  | 1.984073811  | 3.585121301  |
| 54813 | 6.129093229  | 5.859383  | 6.398803434  | 4.259012879  | 8.98142958   | 6.62022123   |
| 54815 | -0.352108471 | -0.352108 | -0.352108471 | 4.574700105  | 9.729374277  | 7.152037191  |
| 54816 | 5.90029238   | 3.03183   | 8.768754781  | -0.352108471 | -0.352108471 | -0.352108471 |
| 54821 | -0.352108471 | -0.352108 | -0.352108471 | 0.940233577  | 2.232575625  | -0.352108471 |
| 54822 | 7.350009179  | 8.5607412 | 9.771473312  | 9.608477625  | 5.227293693  | 7.417885659  |
| 54829 | 4.551931141  | 0.3397199 | 2.44582553   | -0.352108471 | -0.352108471 | -0.352108471 |
| 54831 | -0.352108471 | -0.352108 | -0.352108471 | 6.833207703  | 5.298417208  | 8.367998198  |
| 54834 | -0.352108471 | -0.352108 | -0.352108471 | 1.631676003  | 3.615460478  | -0.352108471 |
| 54840 | 6.502263028  | 6.1735584 | 6.830967621  | -0.352108471 | -0.352108471 | -0.352108471 |
| 54841 | 7.536751785  | 8.6361134 | 6.437390133  | 6.664211791  | 6.393291482  | 6.528751636  |
| 54842 | 6.737551942  | 5.7465446 | 6.242048279  | -0.352108471 | -0.352108471 | -0.352108471 |
| 54843 | 7.127169143  | 6.502263  | 5.877356913  | 6.415928975  | 6.581904074  | 6.249953876  |
| 54847 | 3.419976621  | 1.2079068 | 2.313941724  | -0.352108471 | -0.352108471 | -0.352108471 |
| 54849 | 8.875558499  | 4.2378213 | 6.556689902  | 5.918509458  | 4.651439255  | 5.284974356  |
| 54851 | 8.428245087  | 5.8529375 | 3.277629836  | -0.352108471 | -0.352108471 | -0.352108471 |
| 54856 | 1.646363336  | 2.4458255 | 3.245287724  | 7.315505558  | 5.052422474  | 6.183964016  |
| 54858 | -0.352108471 | -0.352108 | -0.352108471 | 2.38621749   | 5.124543452  | -0.352108471 |
| 54861 | 6.607377459  | 6.6215439 | 6.593211042  | -0.352108471 | -0.352108471 | -0.352108471 |
| 54863 | 6.702890375  | 4.7908469 | 8.614933804  | 1.971716184  | 4.036683664  | 6.101651144  |
| 54865 | 6.658023207  | 5.4545566 | 7.861489807  | 3.953053961  | 6.38526169   | 5.169157826  |
| 54867 | 5.35376166   | 1.6765208 | 3.515141236  | 8.001358392  | 2.737305785  | 5.369332089  |
| 54868 | 3.805664353  | 1.0788104 | 6.532518306  | 5.637296679  | 2.963455425  | 8.311137932  |
| 54870 | 2.351086241  | 2.2047626 | 2.497409858  | 7.27562412   | 6.149337851  | 5.023051581  |
| 54875 | -0.352108471 | -0.352108 | -0.352108471 | 0.82273449   | -0.352108471 | 1.997577452  |
| 54880 | 2.313941724  | 0.768052  | 3.859831404  | -0.352108471 | -0.352108471 | -0.352108471 |
| 54884 | -0.352108471 | -0.352108 | -0.352108471 | 5.377212601  | 4.813635374  | 5.095423988  |
| 54885 | 5.68288063   | 5.5081187 | 5.595499658  | 8.577879408  | 3.501423418  | 6.039651413  |
| 54888 | -0.352108471 | -0.352108 | -0.352108471 | 6.217177009  | 6.588465267  | 5.845888751  |
| 54890 | -0.352108471 | -0.352108 | -0.352108471 | 2.121850199  | 3.630525242  | 5.139200285  |
| 54892 | -0.352108471 | -0.352108 | -0.352108471 | 7.333599114  | 6.32531018   | 5.317021247  |
| 54896 | 4.663000528  | 4.4826926 | 4.843308497  | 1.549724107  | 1.549724107  | 1.549724107  |
| 54897 | -0.352108471 | -0.352108 | -0.352108471 | 6.447138931  | 5.23117587   | 4.01521281   |
| 54899 | 4.475811998  | 7.9492604 | 6.212536209  | 4.807156471  | 5.789762726  | 6.772368981  |
| 54900 | 5.038089054  | 5.8811041 | 4.195074022  | 3.908180645  | 2.252618212  | 5.563743079  |
| 54901 | 5.023812365  | 4.3859368 | 5.661687951  | 5.440881004  | 4.843308497  | 6.038453511  |
| 54902 | 7.409130764  | 6.4706128 | 6.939871798  | -0.352108471 | -0.352108471 | -0.352108471 |
| 54904 | 4.3676597    | 7.6731025 | 6.020381091  | 6.587502004  | 5.233567424  | 3.879632843  |
| 54906 | 8.069596053  | 8.0888602 | 8.050331905  | 7.036396027  | 7.044177561  | 7.028614492  |
| 54908 | -0.352108471 | -0.352108 | -0.352108471 | 6.948900943  | 5.163207055  | 6.056053999  |

|       |              |           |              |              |              |              |
|-------|--------------|-----------|--------------|--------------|--------------|--------------|
| 54913 | -0.352108471 | -0.352108 | -0.352108471 | 4.53664933   | 1.701648233  | 3.119148782  |
| 54915 | 4.550307802  | 6.1219461 | 2.978669528  | 0.95025487   | -0.352108471 | 2.252618212  |
| 54916 | -0.352108471 | -0.352108 | -0.352108471 | 3.329263459  | 6.861584516  | 5.095423988  |
| 54918 | 9.682169607  | 6.6400194 | 3.597869178  | 4.168950146  | 7.875151704  | 6.022050925  |
| 54919 | 2.810374321  | 6.6523102 | 4.731342239  | 2.014151132  | 3.637093921  | 2.825622527  |
| 54920 | -0.352108471 | -0.352108 | -0.352108471 | 5.529311366  | 5.292977085  | 5.765645647  |
| 54921 | -0.352108471 | -0.352108 | -0.352108471 | 6.415928975  | 9.622979133  | 3.208878817  |
| 54922 | -0.352108471 | -0.352108 | -0.352108471 | 4.178899946  | 4.245214285  | 4.112585606  |
| 54923 | 3.636824788  | 3.9195059 | 3.354143641  | 6.359270363  | 6.383151496  | 6.33538923   |
| 54925 | 2.854049416  | 3.2452353 | 3.636421193  | 3.038680847  | 6.429470164  | -0.352108471 |
| 54926 | -0.352108471 | -0.352108 | -0.352108471 | 3.807425866  | 2.743882657  | 4.870969075  |
| 54928 | 5.760328836  | 8.5781316 | 7.169230199  | 4.486893444  | 3.553932763  | 5.419854124  |
| 54930 | 1.779634147  | 8.5248601 | 5.152247113  | -0.352108471 | -0.352108471 | -0.352108471 |
| 54933 | 8.052703623  | 5.1837761 | 6.618239874  | 4.363415057  | 5.345666926  | 6.327918794  |
| 54934 | -0.352108471 | -0.352108 | -0.352108471 | 1.400698343  | -0.352108471 | 3.153505157  |
| 54936 | 5.775231583  | 4.7515777 | 6.798885497  | 5.862190408  | 6.022050925  | 6.181911442  |
| 54939 | 7.679586811  | 9.0748086 | 6.284365007  | 6.385876888  | 7.577900666  | 6.981888777  |
| 54940 | -0.352108471 | -0.352108 | -0.352108471 | 5.693578671  | 6.802225342  | 7.910872012  |
| 54942 | 5.463922025  | 4.3542761 | 6.573567905  | -0.352108471 | -0.352108471 | -0.352108471 |
| 54944 | 8.289832316  | 7.5854585 | 6.881084692  | 6.962911095  | 5.128297619  | 8.797524571  |
| 54946 | -0.352108471 | -0.352108 | -0.352108471 | 6.663856474  | 6.689878453  | 6.637834496  |
| 54947 | 3.470136814  | 5.9414478 | 8.412758832  | 2.043642601  | 1.269708024  | 2.817577178  |
| 54948 | -0.352108471 | -0.352108 | -0.352108471 | 6.810787265  | 4.341180188  | 5.575983727  |
| 54949 | -0.352108471 | -0.352108 | -0.352108471 | 2.527034931  | 4.245214285  | 0.808855576  |
| 54958 | -0.352108471 | -0.352108 | -0.352108471 | 3.245625856  | 4.470626423  | 2.020625289  |
| 54961 | 5.747301951  | 3.3521548 | 4.549728355  | 6.223903139  | 3.362112229  | 4.793007684  |
| 54964 | 6.229986339  | 5.2849744 | 4.339962373  | -0.352108471 | -0.352108471 | -0.352108471 |
| 54965 | 7.051819572  | 6.5150311 | 7.588608089  | 6.740979681  | 6.532588736  | 6.949370627  |
| 54968 | -0.352108471 | -0.352108 | -0.352108471 | 4.927679215  | 2.784573532  | 7.070784897  |
| 54969 | 7.042523083  | 8.5912568 | 5.493789338  | -0.352108471 | -0.352108471 | -0.352108471 |
| 54972 | 6.801813774  | 5.5938471 | 8.009780493  | -0.352108471 | -0.352108471 | -0.352108471 |
| 54973 | 5.354685649  | 5.1283305 | 5.581040843  | 1.878185472  | 5.017136436  | 8.156087399  |
| 54976 | 5.354685649  | 5.3835036 | 5.325867653  | 6.903642175  | 6.926801914  | 6.880482436  |
| 54977 | -0.352108471 | -0.352108 | -0.352108471 | 5.154546509  | 5.997420944  | 5.575983727  |
| 54978 | 6.334102349  | 6.0605084 | 6.197305359  | 5.620234771  | 7.853481844  | 10.08672892  |
| 54979 | -0.352108471 | -0.352108 | -0.352108471 | 0.874413692  | -0.352108471 | 2.100935855  |
| 54980 | 5.931810751  | 5.825168  | 6.038453511  | -0.352108471 | -0.352108471 | -0.352108471 |
| 54982 | 3.127737875  | 3.136327  | 3.119148782  | 5.958359385  | 5.958359385  | 5.958359385  |
| 54985 | -0.352108471 | -0.352108 | -0.352108471 | 3.536505546  | 3.919505936  | 3.153505157  |
| 54986 | -0.352108471 | -0.352108 | -0.352108471 | 3.753284825  | 2.191310813  | 5.315258837  |
| 54987 | -0.352108471 | -0.352108 | -0.352108471 | 0.82273449   | -0.352108471 | 1.997577452  |
| 54989 | 5.743427971  | 5.825168  | 5.661687951  | 0.624614178  | 0.808855576  | 0.440372779  |
| 54994 | 7.6453538    | 6.4396924 | 7.042523083  | -0.352108471 | -0.352108471 | -0.352108471 |
| 54996 | 5.506320168  | 5.054281  | 5.958359385  | -0.352108471 | -0.352108471 | -0.352108471 |
| 54998 | 6.553666035  | 6.2570463 | 5.960426651  | 9.336167023  | 8.669171663  | 8.002176304  |
| 55002 | -0.352108471 | -0.352108 | -0.352108471 | 7.967719037  | 6.675314719  | 5.3829104    |
| 55004 | 4.178899946  | 4.8615173 | 3.496282571  | 7.361848237  | 5.776469942  | 6.56915909   |

|       |              |           |              |              |              |              |
|-------|--------------|-----------|--------------|--------------|--------------|--------------|
| 55007 | 7.072293719  | 6.0316538 | 8.112933652  | 6.602657749  | 5.287360142  | 7.917955356  |
| 55009 | 5.768807923  | 6.379717  | 6.990626032  | 1.598101998  | -0.952181543 | 4.148385539  |
| 55010 | 5.18789546   | 7.3597691 | 6.273832259  | 5.956840309  | 6.165870606  | 6.374900903  |
| 55011 | -0.352108471 | -0.352108 | -0.352108471 | 6.34641237   | 6.204656258  | 6.062900146  |
| 55012 | 6.104798308  | 8.7782849 | 3.431311755  | -0.352108471 | -0.352108471 | -0.352108471 |
| 55013 | -0.352108471 | -0.352108 | -0.352108471 | 2.451290702  | 5.254689875  | -0.352108471 |
| 55014 | 6.735779686  | 7.572746  | 5.898813403  | 5.412561087  | 4.520449918  | 6.304672257  |
| 55017 | 4.897279614  | 6.571532  | 8.245784341  | 5.800199788  | 9.661200602  | 1.939198973  |
| 55018 | 1.115419563  | 1.5010176 | 1.886615606  | 5.240354047  | 4.691916222  | 4.143478396  |
| 55023 | 7.675582535  | 5.3991849 | 6.537383725  | 4.921245645  | 5.101786835  | 5.282328025  |
| 55027 | 1.392109249  | 2.6841069 | 0.100111599  | 1.432957346  | 1.825329981  | 2.217702616  |
| 55030 | -0.352108471 | -0.352108 | -0.352108471 | 1.968661759  | 1.997577452  | 1.939746065  |
| 55031 | -0.352108471 | -0.352108 | -0.352108471 | 6.735779686  | 9.61109233   | 3.860467042  |
| 55032 | -0.352108471 | -0.352108 | -0.352108471 | 5.788761324  | 5.821410838  | 5.854060352  |
| 55033 | 6.051283555  | 8.0021844 | 7.026733991  | 6.654609994  | 6.629085838  | 6.680134151  |
| 55035 | 5.622434355  | 3.182219  | 8.062649718  | 6.204656258  | 7.501860847  | 4.907451669  |
| 55037 | -0.352108471 | -0.352108 | -0.352108471 | 7.311506909  | 7.187667549  | 7.435346269  |
| 55041 | 9.218299488  | 7.5665544 | 5.914809282  | 4.927973588  | 6.050658323  | 7.173343058  |
| 55048 | -0.352108471 | -0.352108 | -0.352108471 | 6.918733623  | 5.950555894  | 6.434644758  |
| 55049 | 6.688515381  | 5.451953  | 7.925077713  | 5.723485516  | 5.731413688  | 5.715557343  |
| 55052 | -0.352108471 | -0.352108 | -0.352108471 | 6.964225117  | 7.159614859  | 7.061919988  |
| 55054 | -0.352108471 | -0.352108 | -0.352108471 | 5.164205092  | 5.095423988  | 5.026642884  |
| 55055 | 5.664172181  | 6.0736545 | 5.254689875  | 5.760537073  | 5.775231583  | 5.745842563  |
| 55056 | -0.352108471 | -0.352108 | -0.352108471 | 3.120807694  | 2.686833264  | 3.554782125  |
| 55062 | -0.352108471 | -0.352108 | -0.352108471 | 8.14878294   | 6.514592953  | 4.880402967  |
| 55064 | 6.142514077  | 6.6400194 | 7.137524708  | -0.352108471 | -0.352108471 | -0.352108471 |
| 55065 | -0.352108471 | -0.352108 | -0.352108471 | 6.98391079   | 6.208432776  | 5.432954762  |
| 55069 | -0.352108471 | -0.352108 | -0.352108471 | 6.332483041  | 6.834405266  | 6.583444154  |
| 55071 | 6.414258136  | 6.4453648 | 6.383151496  | 6.631357585  | 6.674249904  | 6.588465267  |
| 55073 | 4.968876799  | 4.5968917 | 5.340861945  | -0.352108471 | -0.352108471 | -0.352108471 |
| 55074 | -0.352108471 | -0.352108 | -0.352108471 | 5.760918599  | 4.927679215  | 4.094439831  |
| 55075 | 7.041132241  | 5.4477908 | 6.24446152   | 9.375770134  | 7.449953079  | 8.412861606  |
| 55081 | -0.352108471 | -0.352108 | -0.352108471 | 7.241986056  | 6.149337851  | 5.056689645  |
| 55083 | -0.352108471 | -0.352108 | -0.352108471 | 6.48960905   | 6.671874638  | 6.854140227  |
| 55093 | -0.352108471 | -0.352108 | -0.352108471 | 4.456886199  | 5.254237572  | 3.659534827  |
| 55095 | -0.352108471 | -0.352108 | -0.352108471 | 5.994586978  | 8.46722126   | 7.230904119  |
| 55101 | -0.352108471 | -0.352108 | -0.352108471 | 5.077715323  | 6.033399587  | 6.989083851  |
| 55105 | 7.532706586  | 6.4862653 | 5.439823932  | -0.352108471 | -0.352108471 | -0.352108471 |
| 55107 | -0.352108471 | -0.352108 | -0.352108471 | 2.301055037  | 1.421157603  | 3.180952471  |
| 55108 | 5.034059334  | 5.7494021 | 6.464744895  | 5.365324136  | 6.396868383  | 7.428412629  |
| 55111 | -0.352108471 | -0.352108 | -0.352108471 | 3.583632251  | 2.039485684  | 0.495339118  |
| 55114 | -0.352108471 | -0.352108 | -0.352108471 | 7.106011286  | 6.379921394  | 7.832101178  |
| 55116 | 2.685821551  | 2.6547897 | 2.623757929  | 4.79472922   | 6.219993395  | 3.369465046  |
| 55119 | 6.073654487  | 6.0736545 | 6.073654487  | 6.3629082    | 6.410585269  | 6.31523113   |
| 55122 | 6.906333693  | 7.0919708 | 6.720696571  | 1.76984594   | 1.807952763  | 1.731739118  |
| 55124 | 6.209189517  | 5.825168  | 6.593211042  | 2.4171862    | 2.686833264  | 2.147539136  |
| 55125 | 7.906269112  | 8.7359201 | 8.321094611  | -0.352108471 | -0.352108471 | -0.352108471 |

|       |              |           |              |              |              |              |
|-------|--------------|-----------|--------------|--------------|--------------|--------------|
| 55128 | 5.886580909  | 8.0205592 | 3.752602645  | 1.591046029  | 1.876861374  | 1.305230684  |
| 55133 | 5.924636176  | 7.4544397 | 6.689537938  | -0.352108471 | -0.352108471 | -0.352108471 |
| 55138 | 2.932305749  | 2.5530733 | 2.173840844  | -0.352108471 | -0.352108471 | -0.352108471 |
| 55139 | -0.352108471 | -0.352108 | -0.352108471 | 5.859617369  | 5.348078894  | 6.371155844  |
| 55142 | 7.218147054  | 6.8086736 | 7.627620525  | 5.201358809  | 5.54408868   | 4.858628938  |
| 55144 | 5.364396521  | 7.8972681 | 10.43013958  | 7.551136183  | 9.263834232  | 5.838438134  |
| 55149 | 7.706634876  | 7.7938865 | 7.619383264  | 6.872480799  | 7.135139919  | 6.609821679  |
| 55152 | -0.352108471 | -0.352108 | -0.352108471 | 4.843807885  | 6.072702243  | 5.458255064  |
| 55154 | 5.710376656  | 5.5882244 | 5.832528937  | 0.940233577  | 2.232575625  | -0.352108471 |
| 55157 | -0.352108471 | -0.352108 | -0.352108471 | 6.474604683  | 6.113115027  | 5.751625371  |
| 55160 | 6.229863096  | 5.2024139 | 7.257312332  | 4.663254863  | 4.927679215  | 5.192103567  |
| 55161 | 5.941762076  | 5.7155573 | 6.167966808  | 6.41724734   | 6.479332994  | 6.355161685  |
| 55163 | 7.146051896  | 7.6774193 | 7.411735596  | 7.027375773  | 7.94872399   | 6.106027556  |
| 55165 | -0.352108471 | -0.352108 | -0.352108471 | 6.127547123  | 8.108083215  | 7.117815169  |
| 55171 | 5.868750891  | 9.6248615 | 7.746806187  | 6.627434945  | 4.051426259  | 9.203443632  |
| 55173 | 7.191783448  | 6.3676161 | 5.543448678  | 4.508312208  | 5.65835131   | 5.083331759  |
| 55174 | -0.352108471 | -0.352108 | -0.352108471 | 4.756084874  | 7.776649513  | 6.266367194  |
| 55175 | 7.83762433   | 7.5648175 | 7.292010696  | 3.728048194  | 2.100935855  | 5.355160532  |
| 55177 | 6.607377459  | 8.7800045 | 4.434750465  | 5.169157826  | 5.191222747  | 5.147092904  |
| 55179 | 3.708250298  | 7.2058417 | 5.457046014  | 0.624614178  | 0.440372779  | 0.808855576  |
| 55182 | -0.352108471 | -0.352108 | -0.352108471 | 6.568081043  | 6.396868383  | 6.225655722  |
| 55184 | 5.758523395  | 6.2515562 | 5.265490541  | 3.748374607  | 5.916973891  | 4.832674249  |
| 55186 | 3.980884861  | 4.8786655 | 5.776446095  | 6.930390828  | 6.16151075   | 6.545950789  |
| 55187 | 6.551519093  | 5.0883424 | 8.014695776  | -0.352108471 | -0.352108471 | -0.352108471 |
| 55188 | 2.681724436  | 3.0218939 | 2.34155499   | -0.352108471 | -0.352108471 | -0.352108471 |
| 55191 | -0.352108471 | -0.352108 | -0.352108471 | 7.208624718  | 5.017136436  | 2.825648154  |
| 55193 | -0.352108471 | -0.352108 | -0.352108471 | 5.377275034  | 7.704743061  | 6.541009048  |
| 55194 | 7.207838162  | 8.0519438 | 6.363732508  | 5.953806071  | 8.233856234  | 10.5139064   |
| 55195 | 5.567994192  | 5.7359892 | 5.903984111  | 6.672907029  | 5.511952341  | 7.833861718  |
| 55198 | 1.392109249  | 3.136327  | -0.352108471 | 0.292732044  | 3.919505936  | 7.546279828  |
| 55200 | -0.352108471 | -0.352108 | -0.352108471 | 2.884085473  | 3.572809864  | 3.228447668  |
| 55201 | 5.303441833  | 6.056054  | 6.808666165  | -0.352108471 | -0.352108471 | -0.352108471 |
| 55205 | -0.352108471 | -0.352108 | -0.352108471 | 6.682822443  | 7.62312604   | 5.742518845  |
| 55206 | 7.093830636  | 7.6972857 | 6.490375619  | 3.413859648  | 6.157655056  | 8.901450464  |
| 55208 | 8.235365546  | 8.9027813 | 7.56794981   | 6.523594479  | 8.624216706  | 4.422972251  |
| 55209 | 6.289711002  | 5.8001998 | 5.310688573  | -0.352108471 | -0.352108471 | -0.352108471 |
| 55210 | -0.352108471 | -0.352108 | -0.352108471 | 4.303912246  | 3.776859569  | 4.830964923  |
| 55214 | 6.388107363  | 6.1889144 | 6.288510867  | 1.036211897  | 1.14221151   | 0.930212283  |
| 55215 | -0.352108471 | -0.352108 | -0.352108471 | 5.597728237  | 6.215464554  | 4.979991919  |
| 55216 | 4.430045089  | 7.6820629 | 6.056053999  | -0.352108471 | -0.352108471 | -0.352108471 |
| 55226 | -0.352108471 | -0.352108 | -0.352108471 | 5.821410838  | 4.868646042  | 6.774175633  |
| 55228 | 2.481575183  | 4.1227315 | 0.840418915  | 3.701877892  | 0.351893671  | 7.051862114  |
| 55234 | 8.709851525  | 7.1256647 | 5.541477781  | 7.123669946  | 9.195829566  | 5.051510326  |
| 55238 | 6.521408278  | 6.0411302 | 7.001686328  | 4.463476681  | 5.021739545  | 5.580002409  |
| 55239 | 6.770915757  | 8.099141  | 7.435028399  | 6.467735705  | 7.228147803  | 6.847941754  |
| 55240 | -0.352108471 | -0.352108 | -0.352108471 | 4.30019621   | 7.998479491  | 6.149337851  |
| 55247 | -0.352108471 | -0.352108 | -0.352108471 | 6.296043865  | 4.474671971  | 8.11741576   |



|       |              |           |              |              |              |              |
|-------|--------------|-----------|--------------|--------------|--------------|--------------|
| 55250 | -0.352108471 | -0.352108 | -0.352108471 | 6.539110051  | 6.617035395  | 6.461184708  |
| 55252 | -0.352108471 | -0.352108 | -0.352108471 | 7.495550985  | 8.416922778  | 7.956236881  |
| 55256 | 8.091674987  | 6.6400194 | 5.188363799  | 7.4668722    | 10.88185977  | 4.051884627  |
| 55257 | 3.895359011  | 5.3546856 | 6.814012287  | 5.729430242  | 6.170030093  | 6.610629944  |
| 55262 | 8.627323979  | 1.9426247 | 5.284974356  | 5.152996505  | 7.439091226  | 6.296043865  |
| 55266 | 6.133248067  | 4.69484   | 3.256431892  | 5.636342902  | 6.470939859  | 6.053641381  |
| 55269 | -0.352108471 | -0.352108 | -0.352108471 | 0.421012343  | 9.422986951  | 4.921999647  |
| 55272 | -0.352108471 | -0.352108 | -0.352108471 | 5.637296679  | 4.345997259  | 6.928596098  |
| 55276 | -0.352108471 | -0.352108 | -0.352108471 | 5.017136436  | 3.957881955  | 6.076390916  |
| 55278 | 3.245235305  | 3.428504  | 3.061966623  | 2.133979419  | 3.604915675  | 0.663043163  |
| 55280 | 4.551347431  | 4.7746536 | 4.663000528  | 0.727922146  | 1.807952763  | -0.352108471 |
| 55285 | 5.188023226  | 7.712057  | 6.450040136  | 8.035534783  | 6.747964147  | 5.460393511  |
| 55288 | 6.958027251  | 6.2521643 | 6.605095787  | 0.044132154  | 0.440372779  | -0.352108471 |
| 55290 | 6.056053999  | 3.8711218 | 8.240986195  | -0.352108471 | -0.352108471 | -0.352108471 |
| 55293 | 7.109007851  | 6.4333187 | 5.757629605  | -0.352108471 | -0.352108471 | -0.352108471 |
| 55294 | 6.705287512  | 7.5343854 | 5.876189592  | 5.723485516  | 4.76461212   | 6.682358911  |
| 55297 | 4.878665478  | 4.876467  | 4.880863991  | -0.352108471 | -0.352108471 | -0.352108471 |
| 55298 | 5.287363196  | 6.3712083 | 4.203518064  | 5.113559352  | 6.91845452   | 6.016006936  |
| 55299 | -0.352108471 | -0.352108 | -0.352108471 | 5.20089139   | 3.40855663   | 6.99322615   |
| 55300 | 1.068424843  | 1.3835202 | 1.698615467  | 5.980334028  | 6.416147401  | 5.544520655  |
| 55301 | 5.878648753  | 6.3241383 | 6.769627837  | 6.000983357  | 6.288401646  | 6.575819935  |
| 55308 | 6.735779686  | 7.4694812 | 6.002078175  | 2.795182383  | 3.337746555  | 2.252618212  |
| 55311 | -0.352108471 | -0.352108 | -0.352108471 | 5.717169102  | 6.270222109  | 6.823275116  |
| 55312 | -0.352108471 | -0.352108 | -0.352108471 | 2.497489344  | 3.740808219  | 3.119148782  |
| 55313 | 5.06884253   | 5.3835036 | 4.754181416  | 7.189945282  | 7.233409808  | 7.146480757  |
| 55317 | 2.980965692  | 4.0160458 | 5.051125849  | 7.415637154  | 7.010596604  | 7.820677703  |
| 55323 | -0.352108471 | -0.352108 | -0.352108471 | 5.575983727  | 6.552901374  | 4.599066079  |
| 55324 | -0.352108471 | -0.352108 | -0.352108471 | 6.567242302  | 6.013323705  | 5.459405109  |
| 55325 | -0.352108471 | -0.352108 | -0.352108471 | 7.620894845  | 3.36730463   | -0.886285586 |
| 55327 | 4.725685207  | 3.6761388 | 5.775231583  | 1.58479924   | 1.437859363  | 1.731739118  |
| 55331 | 8.390305846  | 7.1054593 | 9.675152417  | 10.01762311  | 4.940842697  | 7.479232901  |
| 55332 | 6.901979267  | 6.8795537 | 6.924404788  | 8.122214126  | 9.395606489  | 6.848821762  |
| 55333 | 5.581892295  | 4.3193847 | 6.84439993   | 7.518618502  | 6.523809895  | 5.529001288  |
| 55334 | -0.352108471 | -0.352108 | -0.352108471 | 11.01717006  | 7.311506909  | 3.605843761  |
| 55337 | 5.638440722  | 6.3583722 | 5.998406448  | 2.393884559  | 3.970916082  | 0.816853037  |
| 55338 | 11.13656857  | 9.3120279 | 10.22429824  | 8.687824621  | 8.068254759  | 8.37803969   |
| 55341 | 6.513388045  | 5.4166411 | 4.319894132  | 5.418927122  | 8.50188854   | 2.335965704  |
| 55343 | 7.1250675    | 9.7127339 | 4.537401137  | 0.869437987  | 2.686833264  | 4.50422854   |
| 55352 | 6.107538801  | 4.0931198 | 8.121957827  | 2.252618212  | 2.157658228  | 2.347578196  |
| 55353 | -0.352108471 | -0.352108 | -0.352108471 | 6.803911573  | 7.435116686  | 8.066321798  |
| 55355 | 5.827205236  | 6.2558778 | 5.398532684  | -0.352108471 | -0.352108471 | -0.352108471 |
| 55357 | 5.352963836  | 6.1458404 | 5.749402114  | 5.168862837  | 2.360239897  | 7.977485777  |
| 55361 | 6.674128879  | 6.6898785 | 6.658379305  | 6.997455924  | 7.016299086  | 6.978612763  |
| 55362 | 5.428393874  | 6.7688278 | 4.08795991   | 7.036520286  | 9.203001812  | 4.870038761  |
| 55364 | -0.352108471 | -0.352108 | -0.352108471 | 5.643917324  | 6.056053999  | 6.468190674  |
| 55366 | -0.352108471 | -0.352108 | -0.352108471 | 5.458255064  | 7.59796796   | 3.318542168  |
| 55367 | -0.352108471 | -0.352108 | -0.352108471 | 5.745394463  | 5.775231583  | 5.715557343  |

|       |              |           |              |              |              |              |
|-------|--------------|-----------|--------------|--------------|--------------|--------------|
| 55379 | 6.717944937  | 7.9311975 | 9.144450044  | 8.35946807   | 8.927116711  | 7.791819429  |
| 55384 | 6.878058762  | 4.4343147 | 1.990570576  | 4.588844105  | 4.456886199  | 4.324928294  |
| 55421 | 6.119207367  | 3.9122807 | 8.32613407   | 5.27122146   | 6.667687048  | 3.874755873  |
| 55422 | -0.352108471 | -0.352108 | -0.352108471 | 5.441867342  | 3.878248037  | 4.66005769   |
| 55425 | 6.705287512  | 3.7447705 | 9.665804523  | 0.647185709  | -0.352108471 | 1.646479888  |
| 55437 | -0.352108471 | -0.352108 | -0.352108471 | 7.336289898  | 6.463674915  | 5.591059932  |
| 55449 | 4.121813477  | 9.4494478 | 6.785630654  | 6.59549746   | 6.796870789  | 6.998244118  |
| 55450 | 5.319117131  | 5.6087269 | 5.463922025  | 8.987376304  | 7.090076417  | 5.19277653   |
| 55454 | -0.352108471 | -0.352108 | -0.352108471 | 7.304622832  | 5.869665514  | 4.434708197  |
| 55471 | 7.359883697  | 7.6817556 | 8.003627415  | 6.40286535   | 5.911035771  | 6.894694928  |
| 55501 | 7.030793546  | 6.1679668 | 5.305140071  | 1.05704313   | 0.808855576  | 1.305230684  |
| 55504 | -0.352108471 | -0.352108 | -0.352108471 | 4.178899946  | 5.603977489  | 2.753822402  |
| 55505 | -0.352108471 | -0.352108 | -0.352108471 | 5.293500402  | 8.315945881  | 6.804723141  |
| 55508 | 6.972176722  | 7.3915683 | 6.552785117  | 2.88676039   | 4.843308497  | 0.930212283  |
| 55511 | -0.352108471 | -0.352108 | -0.352108471 | 2.38621749   | 1.49495207   | 3.27748291   |
| 55512 | -0.352108471 | -0.352108 | -0.352108471 | 6.82244073   | 6.969141537  | 6.675739923  |
| 55526 | 7.886660128  | 9.6575902 | 6.115730079  | 5.262366871  | 6.265638387  | 7.268909902  |
| 55527 | 4.148643332  | 9.7863792 | 6.967511245  | 5.923493182  | 5.926961306  | 5.920025058  |
| 55530 | 8.539209891  | 7.4632677 | 6.387325477  | 5.343003906  | 8.770748776  | 7.056876341  |
| 55531 | 8.150383151  | 7.9748192 | 8.3259471    | 6.834255134  | 7.109037535  | 6.559472732  |
| 55544 | 7.680387293  | 6.9134889 | 6.146590504  | 2.492032424  | 5.336173319  | -0.352108471 |
| 55558 | 8.962566876  | 7.2682187 | 5.573870562  | 5.471523648  | 5.179908508  | 5.325716078  |
| 55567 | 5.203503428  | 6.2953008 | 5.749402114  | -0.352108471 | -0.352108471 | -0.352108471 |
| 55568 | 7.469118306  | 7.3777551 | 7.286391961  | 0.939116071  | 0.440372779  | 1.437859363  |
| 55571 | -0.352108471 | -0.352108 | -0.352108471 | 7.234851541  | 8.657399332  | 5.81230375   |
| 55573 | 8.563313237  | 8.8654423 | 8.26118421   | 7.508938593  | 7.653578306  | 7.798218019  |
| 55578 | 5.463922025  | 7.3941633 | 3.533680733  | 5.883760549  | 6.10626679   | 6.328773031  |
| 55582 | -0.352108471 | -0.352108 | -0.352108471 | 1.968661759  | 1.997577452  | 1.939746065  |
| 55585 | 7.237556464  | 3.8799793 | 5.55876787   | 7.816131679  | 5.655427693  | 6.735779686  |
| 55588 | 7.192541266  | 6.7431167 | 6.293692114  | 2.85499773   | 3.955942293  | 1.754053167  |
| 55591 | 2.649419007  | 7.7855633 | 5.217491139  | -0.352108471 | -0.352108471 | -0.352108471 |
| 55593 | -0.352108471 | -0.352108 | -0.352108471 | 3.812727913  | 7.364389464  | 10.91605101  |
| 55596 | 5.255522095  | 4.9140225 | 5.597021732  | 5.83433693   | 5.893442277  | 5.775231583  |
| 55599 | 2.681724436  | 3.4987012 | 1.864747714  | 5.637296679  | 6.700628631  | 4.573964727  |
| 55602 | -0.352108471 | -0.352108 | -0.352108471 | 6.235921161  | 6.246629235  | 6.225213087  |
| 55604 | 6.991795048  | 6.9981067 | 6.985483415  | 0.044132154  | 0.440372779  | -0.352108471 |
| 55607 | -0.352108471 | -0.352108 | -0.352108471 | 5.596916991  | 5.67757571   | 5.516258273  |
| 55610 | -0.352108471 | -0.352108 | -0.352108471 | 2.076022254  | 2.100935855  | 2.051108653  |
| 55611 | 5.571436751  | 5.6886226 | 5.805808543  | 11.41520493  | 3.396021543  | 7.405613237  |
| 55614 | 4.855015771  | 5.5799665 | 5.217491139  | 2.43016825   | -0.352108471 | 5.212444972  |
| 55615 | 1.321522306  | 4.9339534 | 3.127737875  | 4.249557331  | 6.137866886  | 8.026176441  |
| 55620 | 3.968518528  | 4.2452143 | 3.69182277   | 2.301055037  | 4.954218546  | -0.352108471 |
| 55621 | 6.77374078   | 8.7156105 | 4.831871014  | 3.12397275   | 3.677812865  | 4.231652981  |
| 55623 | 4.955814037  | 5.0171364 | 5.078458834  | -0.352108471 | -0.352108471 | -0.352108471 |
| 55624 | -0.352108471 | -0.352108 | -0.352108471 | 6.225162754  | 5.11898394   | 7.331341568  |
| 55625 | -0.352108471 | -0.352108 | -0.352108471 | 5.605179132  | 5.845499835  | 6.085820539  |
| 55629 | 7.680370506  | 6.6561251 | 5.631879622  | 4.776750732  | 3.228447668  | 1.680144605  |

|       |              |           |              |              |              |              |
|-------|--------------|-----------|--------------|--------------|--------------|--------------|
| 55632 | 4.687425547  | 8.35252   | 6.519972795  | -0.352108471 | -0.352108471 | -0.352108471 |
| 55634 | 4.297639083  | 4.4826926 | 4.112585606  | 3.351148927  | 5.893442277  | 0.808855576  |
| 55635 | 5.082403109  | 6.0894758 | 7.096548526  | 2.825622527  | 3.919505936  | 1.731739118  |
| 55638 | -0.352108471 | -0.352108 | -0.352108471 | 7.968598773  | 4.769714408  | 6.369156591  |
| 55643 | 7.012904137  | 6.502263  | 5.99162192   | 5.681727979  | 4.408596279  | 6.954859678  |
| 55646 | -0.352108471 | -0.352108 | -0.352108471 | 6.235921161  | 3.335363006  | 9.136479316  |
| 55651 | -0.352108471 | -0.352108 | -0.352108471 | 8.618324117  | 6.709482007  | 4.800639897  |
| 55652 | 4.128789217  | 6.6123092 | 5.370549232  | 4.811735937  | 6.847035404  | 8.882334871  |
| 55654 | 4.876017436  | 4.3484155 | 5.403619412  | 9.557819938  | 7.454735544  | 5.35165115   |
| 55657 | 6.273832259  | 7.3073048 | 5.240359743  | -0.352108471 | -0.352108471 | -0.352108471 |
| 55658 | 2.950649284  | 5.1522471 | 7.353844942  | -0.352108471 | -0.352108471 | -0.352108471 |
| 55660 | 4.400341142  | 3.6761388 | 5.124543452  | -0.352108471 | -0.352108471 | -0.352108471 |
| 55661 | -0.352108471 | -0.352108 | -0.352108471 | 7.031454429  | 7.167295284  | 7.30313614   |
| 55663 | -0.352108471 | -0.352108 | -0.352108471 | 6.709482007  | 5.621619332  | 7.797344682  |
| 55664 | -0.352108471 | -0.352108 | -0.352108471 | 5.591254988  | 2.247756883  | 3.919505936  |
| 55666 | 7.816833734  | 8.0995029 | 7.534164577  | 4.440967932  | 0.945112849  | 2.693040391  |
| 55667 | 4.414740353  | 3.7525428 | 3.090345207  | 6.782442412  | 6.951023671  | 6.866733042  |
| 55668 | 8.755587093  | 7.9936758 | 7.231764536  | 3.87668691   | 4.103893054  | 4.331099198  |
| 55669 | -0.352108471 | -0.352108 | -0.352108471 | 5.323028331  | 3.919505936  | 2.515983541  |
| 55670 | 7.368246125  | 7.4315272 | 7.494808305  | 6.50377304   | 5.925043132  | 6.214408086  |
| 55676 | 6.952955212  | 6.9980602 | 7.04316527   | 6.682896946  | 5.711376822  | 4.739856697  |
| 55677 | 7.400498955  | 5.2849744 | 3.169449758  | 6.42520231   | 5.755827116  | 7.094577504  |
| 55679 | 7.163235418  | 7.244076  | 7.082394844  | 7.271069954  | 7.246938498  | 7.29520141   |
| 55689 | 5.826051513  | 5.4582551 | 6.193847962  | 0.044132154  | 0.440372779  | -0.352108471 |
| 55690 | 4.153967827  | 4.0348854 | 4.273050256  | 7.155889879  | 6.039525779  | 8.272253979  |
| 55691 | 6.75358421   | 8.1239472 | 5.383221178  | 6.65068432   | 6.848539219  | 6.74961177   |
| 55695 | -0.352108471 | -0.352108 | -0.352108471 | 4.268504401  | 3.544890796  | 4.992118006  |
| 55697 | -0.352108471 | -0.352108 | -0.352108471 | 8.381185301  | 3.139888845  | 5.760537073  |
| 55698 | 6.538980134  | 5.4596566 | 7.618303658  | -0.352108471 | -0.352108471 | -0.352108471 |
| 55700 | 5.422294084  | 9.0627498 | 7.242521962  | 7.787391935  | 8.621962756  | 6.952821115  |
| 55701 | -0.352108471 | -0.352108 | -0.352108471 | 5.82786553   | 5.230757201  | 5.529311366  |
| 55702 | 4.455411975  | 4.9841517 | 5.512891436  | 0.598807818  | -0.352108471 | 1.549724107  |
| 55703 | 2.451290702  | -0.352108 | 5.254689875  | 4.178899946  | 4.164070437  | 4.193729454  |
| 55704 | 5.354685649  | 5.3835036 | 5.325867653  | 5.723485516  | 5.731413688  | 5.715557343  |
| 55705 | 8.49918517   | 9.1027838 | 9.706382423  | 7.113460584  | 8.840156792  | 7.976808688  |
| 55706 | -0.352108471 | -0.352108 | -0.352108471 | 4.376579178  | 5.814268798  | 5.095423988  |
| 55707 | -0.352108471 | -0.352108 | -0.352108471 | 7.155303995  | 4.904689811  | 6.029996903  |
| 55715 | 6.573968999  | 7.6684273 | 5.47951066   | -0.352108471 | -0.352108471 | -0.352108471 |
| 55720 | 2.721116247  | 5.1693921 | 3.945254192  | 1.043426334  | 1.646479888  | 0.440372779  |
| 55721 | 4.886275954  | 5.8529145 | 5.369595226  | 0.86953393   | 0.808855576  | 0.930212283  |
| 55727 | 1.501017585  | -0.352108 | 3.354143641  | 6.12990004   | 7.87809651   | 4.38170357   |
| 55728 | 5.491200093  | 4.7541814 | 6.228218771  | 5.810560167  | 5.775231583  | 5.845888751  |
| 55729 | 7.173321394  | 6.6416301 | 6.90747574   | 6.716509042  | 6.844298182  | 6.972087322  |
| 55731 | -0.352108471 | -0.352108 | -0.352108471 | 5.958359385  | 5.958359385  | 5.958359385  |
| 55732 | -0.352108471 | -0.352108 | -0.352108471 | 7.071901948  | 4.972199902  | 6.022050925  |
| 55735 | -0.352108471 | -0.352108 | -0.352108471 | 4.611928496  | 8.257361021  | 6.434644758  |
| 55737 | -0.352108471 | -0.352108 | -0.352108471 | 5.849473764  | 7.376789186  | 4.322158341  |

|       |              |           |              |              |              |              |
|-------|--------------|-----------|--------------|--------------|--------------|--------------|
| 55738 | 8.094717949  | 7.6553246 | 7.875021286  | 5.030533283  | 7.963830766  | 6.497182024  |
| 55739 | -0.352108471 | -0.352108 | -0.352108471 | 5.637628902  | 6.296043865  | 6.954458829  |
| 55740 | 5.664172181  | 4.9770767 | 6.351267642  | 8.322490079  | 5.311761046  | 6.817125562  |
| 55742 | 4.498150788  | 5.9253809 | 7.352611004  | 9.949029977  | 8.789483361  | 7.629936745  |
| 55744 | -0.352108471 | -0.352108 | -0.352108471 | 5.958359385  | 5.958359385  | 5.958359385  |
| 55748 | -0.352108471 | -0.352108 | -0.352108471 | 5.300919109  | 6.341902566  | 5.821410838  |
| 55749 | 7.053389612  | 7.701977  | 6.404802267  | 6.23199295   | 6.628098252  | 7.024203553  |
| 55750 | -0.352108471 | -0.352108 | -0.352108471 | 5.704335255  | 3.39211717   | 8.016553339  |
| 55752 | -0.352108471 | -0.352108 | -0.352108471 | 5.937461314  | 5.169157826  | 4.400854337  |
| 55753 | 1.563719053  | 2.6224566 | 3.681194208  | -0.352108471 | -0.352108471 | -0.352108471 |
| 55754 | -0.352108471 | -0.352108 | -0.352108471 | 7.086413157  | 7.093739676  | 7.090076417  |
| 55759 | 4.847192458  | 6.2125362 | 7.57787996   | -0.352108471 | -0.352108471 | -0.352108471 |
| 55761 | -0.352108471 | -0.352108 | -0.352108471 | 8.524217559  | 5.79119766   | 7.15770761   |
| 55762 | 7.336518169  | 5.4953398 | 6.415928975  | 1.179289842  | 1.549724107  | 0.808855576  |
| 55763 | -0.352108471 | -0.352108 | -0.352108471 | 4.178899946  | 4.935055406  | 3.422744485  |
| 55765 | 5.579367614  | 6.0457801 | 5.112955086  | 1.761670631  | 1.646479888  | 1.876861374  |
| 55766 | 8.383027684  | 7.5511362 | 6.719244682  | 5.517196731  | 8.235962799  | 6.876579765  |
| 55768 | -0.352108471 | -0.352108 | -0.352108471 | 4.318823674  | 5.688622647  | 7.05842162   |
| 55769 | 5.044800317  | 5.8830437 | 5.463922025  | -0.352108471 | -0.352108471 | -0.352108471 |
| 55771 | 7.091092121  | 8.1899319 | 9.288771683  | 7.68864657   | 9.538902278  | 5.838390861  |
| 55773 | -0.352108471 | -0.352108 | -0.352108471 | 6.430737678  | 6.204656258  | 5.978574838  |
| 55775 | -0.352108471 | -0.352108 | -0.352108471 | 6.056053999  | 8.686809931  | 3.425298067  |
| 55776 | 7.3241242    | 4.9172564 | 9.730992033  | -0.352108471 | -0.352108471 | -0.352108471 |
| 55777 | 5.800199788  | 4.973486  | 6.626913588  | -0.352108471 | -0.352108471 | -0.352108471 |
| 55778 | 3.868535913  | 4.617923  | 3.119148782  | 5.539774305  | 5.458255064  | 5.621293547  |
| 55780 | 5.307093674  | 5.0651838 | 5.186138762  | 7.218748868  | 7.471015121  | 6.966482616  |
| 55783 | -0.352108471 | -0.352108 | -0.352108471 | 7.440009978  | 5.06205971   | 6.251034844  |
| 55784 | 4.372191214  | 4.1125856 | 4.631796822  | 3.606517346  | 5.336173319  | 1.876861374  |
| 55785 | 4.682964349  | 2.6101215 | 6.7558072    | 4.158869237  | 1.217949484  | 7.099788991  |
| 55790 | 5.545126722  | 5.6886226 | 5.832118572  | -0.352108471 | -0.352108471 | -0.352108471 |
| 55798 | 9.361723234  | 6.0941625 | 7.727942861  | 10.24434892  | 4.075283853  | 7.159816388  |
| 55800 | 4.278704721  | 4.2310973 | 4.183489901  | 1.227667732  | 0.808855576  | 1.646479888  |
| 55802 | 5.724668212  | 6.4722588 | 4.977077659  | 5.370934752  | 6.062716354  | 6.754497955  |
| 55809 | 5.926665747  | 5.4283939 | 4.930122001  | -0.352108471 | -0.352108471 | -0.352108471 |
| 55810 | 6.824706934  | 5.9391922 | 5.053677509  | -0.352108471 | -0.352108471 | -0.352108471 |
| 55811 | 6.868675947  | 5.2849744 | 3.701272766  | -0.352108471 | -0.352108471 | -0.352108471 |
| 55812 | 6.242048279  | 6.2558778 | 6.228218771  | -0.352108471 | -0.352108471 | -0.352108471 |
| 55814 | 4.692989119  | 4.7541814 | 4.631796822  | 3.585121301  | 3.615460478  | 3.554782125  |
| 55815 | -0.352108471 | -0.352108 | -0.352108471 | 5.458255064  | 5.812477721  | 5.104032407  |
| 55823 | -0.352108471 | -0.352108 | -0.352108471 | 5.095423988  | 5.124543452  | 5.066304524  |
| 55824 | 7.50744655   | 6.5851844 | 5.662922201  | 4.776474833  | 6.481523945  | 8.186573057  |
| 55827 | 9.449288932  | 5.8459441 | 7.64761654   | -0.352108471 | -0.352108471 | -0.352108471 |
| 55830 | 3.081461292  | 2.2069086 | 3.956014006  | 7.967036148  | 7.027375773  | 6.087715399  |
| 55831 | 7.192947048  | 7.6283292 | 7.410638113  | 7.904703535  | 7.14555803   | 6.386412524  |
| 55832 | 6.672585169  | 6.901683  | 6.787134073  | 3.787770961  | 6.001809131  | 8.215847301  |
| 55833 | -0.352108471 | -0.352108 | -0.352108471 | 5.382237167  | 8.112305955  | 6.747271561  |
| 55844 | 5.5042802    | 6.9120012 | 8.319722167  | 6.941881205  | 6.23567117   | 5.529461136  |

|       |              |           |              |              |              |              |
|-------|--------------|-----------|--------------|--------------|--------------|--------------|
| 55845 | 7.51917757   | 6.8146941 | 8.223661046  | 6.668335837  | 6.022050925  | 5.375766013  |
| 55850 | 1.697502965  | 2.1956028 | 1.946552907  | 4.456886199  | 3.71637007   | 5.197402329  |
| 55851 | 7.484018122  | 7.4939952 | 7.474040996  | 6.642245802  | 6.63062078   | 6.653870824  |
| 55852 | -0.352108471 | -0.352108 | -0.352108471 | 3.130142041  | 4.076694717  | 3.603418379  |
| 55854 | -0.352108471 | -0.352108 | -0.352108471 | 6.415928975  | 7.824856751  | 5.007001198  |
| 55856 | 7.505122518  | 3.2727311 | 5.388926799  | 8.79434509   | 6.270222109  | 3.746099127  |
| 55858 | -0.352108471 | -0.352108 | -0.352108471 | 7.602877881  | 7.535634638  | 7.468391396  |
| 55859 | -0.352108471 | -0.352108 | -0.352108471 | 7.349440613  | 7.807078794  | 8.264716976  |
| 55860 | 4.151574402  | 4.2452143 | 4.338854169  | 0.372554099  | 3.324709145  | 1.848631622  |
| 55862 | -0.352108471 | -0.352108 | -0.352108471 | 5.789762726  | 5.804293869  | 5.775231583  |
| 55863 | -0.352108471 | -0.352108 | -0.352108471 | 2.846613221  | 7.273972255  | 5.060292738  |
| 55884 | 4.789383821  | 5.2849744 | 5.780564891  | 9.630906271  | 6.655369412  | 8.143137841  |
| 55890 | -0.352108471 | -0.352108 | -0.352108471 | 5.775231583  | 5.775231583  | 5.775231583  |
| 55892 | -0.352108471 | -0.352108 | -0.352108471 | 4.334386097  | 4.435075177  | 4.535764257  |
| 55898 | 5.879796907  | 7.0475529 | 6.463674915  | 6.872926213  | 6.760883872  | 6.816905042  |
| 55902 | -0.352108471 | -0.352108 | -0.352108471 | 6.596757815  | 7.216190289  | 5.977325342  |
| 55904 | 6.212536209  | 7.840436  | 4.584636391  | 3.245625856  | 3.337746555  | 3.153505157  |
| 55905 | 5.284974356  | 5.8506084 | 4.71934028   | 1.876861374  | 1.876861374  | 1.876861374  |
| 55907 | -0.352108471 | -0.352108 | -0.352108471 | 5.789762726  | 5.214004937  | 6.365520515  |
| 55914 | -0.352108471 | -0.352108 | -0.352108471 | 10.63840597  | 6.735779686  | 2.833153406  |
| 55917 | -0.352108471 | -0.352108 | -0.352108471 | 8.579859391  | 2.245262784  | 5.412561087  |
| 55920 | -0.352108471 | -0.352108 | -0.352108471 | 4.183043699  | 4.847568765  | 5.512093832  |
| 55924 | 5.235875513  | 6.2458263 | 7.255777069  | 1.086055948  | 1.731739118  | 0.440372779  |
| 55930 | 5.039857145  | 5.7927795 | 4.286934793  | 0.228373553  | -0.352108471 | 0.808855576  |
| 55954 | -0.352108471 | -0.352108 | -0.352108471 | 5.529311366  | 4.527030553  | 6.531592179  |
| 55959 | -0.352108471 | -0.352108 | -0.352108471 | 4.66005769   | 4.688318557  | 4.631796822  |
| 55966 | 5.428393874  | 5.072397  | 5.784390724  | -0.352108471 | -0.352108471 | -0.352108471 |
| 55967 | 6.054885801  | 7.7423759 | 9.429865929  | 6.12990004   | 6.066856893  | 6.192943187  |
| 55968 | 6.735779686  | 5.0301626 | 8.44139674   | 9.255520967  | 7.78321146   | 6.310901954  |
| 55969 | -0.352108471 | -0.352108 | -0.352108471 | 7.094349975  | 8.635524188  | 5.553175761  |
| 55970 | 8.081466428  | 8.1005797 | 8.062353202  | 7.937881566  | 8.062353202  | 7.813409929  |
| 55971 | 5.961166865  | 6.7059849 | 5.216348867  | -0.352108471 | -0.352108471 | -0.352108471 |
| 55973 | 3.092313489  | 5.3546856 | 7.617057809  | 6.27821251   | 3.756060362  | 5.017136436  |
| 55974 | 7.658728352  | 7.5787856 | 7.738671055  | 1.05704313   | 1.305230684  | 0.808855576  |
| 56005 | 7.707102448  | 8.7361969 | 6.678007979  | 9.577564942  | 8.662645212  | 7.747725482  |
| 56006 | 1.383520155  | -0.352108 | 3.119148782  | 2.351086241  | 5.054280952  | -0.352108471 |
| 56034 | -0.352108471 | -0.352108 | -0.352108471 | 5.263851904  | 3.902909708  | 6.6247941    |
| 56052 | 8.670809626  | 7.3214877 | 5.972165833  | 4.817531639  | 5.260683106  | 4.374380173  |
| 56063 | -0.352108471 | -0.352108 | -0.352108471 | 3.119148782  | 3.390817621  | 2.847479942  |
| 56098 | 6.450302837  | 6.479333  | 6.421272681  | -0.352108471 | -0.352108471 | -0.352108471 |
| 56102 | 3.011970594  | 5.3546856 | 7.697400704  | -0.352108471 | -0.352108471 | -0.352108471 |
| 56106 | 6.120810648  | 9.1291045 | 3.112516782  | -0.352108471 | -0.352108471 | -0.352108471 |
| 56111 | -0.352108471 | -0.352108 | -0.352108471 | 4.725730333  | 6.682940177  | 5.704335255  |
| 56112 | -0.352108471 | -0.352108 | -0.352108471 | 4.456886199  | 5.813835915  | 3.099936484  |
| 56123 | 6.502263028  | 5.4667175 | 7.53780856   | -0.352108471 | -0.352108471 | -0.352108471 |
| 56125 | 4.962326451  | 6.9808719 | 5.971599196  | 0.440372779  | 0.440372779  | 0.440372779  |
| 56127 | 8.119361839  | 5.6519467 | 6.885654293  | 6.707475369  | 5.999070915  | 5.290666462  |

|       |              |           |              |              |              |              |
|-------|--------------|-----------|--------------|--------------|--------------|--------------|
| 56129 | 6.427239861  | 5.5334282 | 5.980334028  | -0.352108471 | -0.352108471 | -0.352108471 |
| 56130 | 7.889542092  | 6.3324667 | 4.775391246  | -0.352108471 | -0.352108471 | -0.352108471 |
| 56131 | 5.334952249  | 5.8278042 | 6.320656234  | -0.352108471 | -0.352108471 | -0.352108471 |
| 56135 | 5.354685649  | 5.3835036 | 5.325867653  | -0.352108471 | -0.352108471 | -0.352108471 |
| 56157 | 5.595499658  | 5.5293114 | 5.661687951  | -0.352108471 | -0.352108471 | -0.352108471 |
| 56160 | 6.134800615  | 6.1679668 | 6.101634422  | -0.352108471 | -0.352108471 | -0.352108471 |
| 56169 | 4.725969713  | 5.9985776 | 5.36227364   | 0.874413692  | -0.352108471 | 2.100935855  |
| 56171 | 5.57473968   | 5.5427961 | 5.55876787   | -0.352108471 | -0.352108471 | -0.352108471 |
| 56172 | 4.843038887  | 4.3943954 | 5.291682362  | -0.352108471 | -0.352108471 | -0.352108471 |
| 56180 | 5.532118463  | 4.691633  | 5.111875725  | 7.911318496  | 7.516025064  | 7.120731633  |
| 56242 | 4.713922221  | 4.6627188 | 4.765125641  | 1.238701993  | 1.778924448  | 2.319146903  |
| 56244 | 5.90029238   | 6.2114335 | 5.589151238  | -0.352108471 | -0.352108471 | -0.352108471 |
| 56252 | 3.127737875  | 3.136327  | 3.119148782  | 5.592773207  | 4.063564683  | 7.121981732  |
| 56253 | 6.309773462  | 4.2695759 | 5.289674704  | 4.125386496  | 2.469725738  | 0.814064979  |
| 56255 | 5.939192221  | 7.8713344 | 4.007050077  | 8.483814337  | 4.610209508  | 6.547011923  |
| 56257 | -0.352108471 | -0.352108 | -0.352108471 | 5.874032613  | 5.534637897  | 5.704335255  |
| 56260 | 3.789504048  | 9.2515078 | 6.520505908  | 3.122004006  | 5.627005534  | 8.132007061  |
| 56262 | 7.035554271  | 7.4338641 | 7.832173927  | 6.709581906  | 6.720696571  | 6.698467242  |
| 56270 | 4.701847563  | 7.6660805 | 6.183964016  | 6.689387364  | 6.920180633  | 6.804783999  |
| 56271 | -0.352108471 | -0.352108 | -0.352108471 | 5.295431597  | 2.77959653   | 7.811266665  |
| 56288 | 7.651923169  | 5.6251608 | 3.598398373  | -0.352108471 | -0.352108471 | -0.352108471 |
| 56301 | 2.833283455  | 1.9391515 | 2.38621749   | 0.044132154  | -0.352108471 | 0.440372779  |
| 56474 | 4.291171802  | 6.078368  | 5.184769894  | -0.352108471 | -0.352108471 | -0.352108471 |
| 56478 | -0.352108471 | -0.352108 | -0.352108471 | 5.54059285   | 6.022050925  | 6.503509     |
| 56548 | -0.352108471 | -0.352108 | -0.352108471 | 5.596916991  | 5.309048244  | 5.884785738  |
| 56603 | 5.680046016  | 5.6251608 | 5.570275527  | -0.352108471 | -0.352108471 | -0.352108471 |
| 56616 | -0.352108471 | -0.352108 | -0.352108471 | 4.863989554  | 5.474326098  | 5.169157826  |
| 56648 | 6.449648682  | 6.0651966 | 5.680744586  | 4.917166473  | 6.625247983  | 8.333329493  |
| 56651 | 4.449748927  | 4.9799919 | 3.919505936  | 1.744735086  | 1.939746065  | 1.549724107  |
| 56652 | -0.352108471 | -0.352108 | -0.352108471 | 5.095423988  | 5.124543452  | 5.066304524  |
| 56654 | -0.352108471 | -0.352108 | -0.352108471 | 7.649062677  | 7.749669138  | 7.548456216  |
| 56655 | -0.352108471 | -0.352108 | -0.352108471 | 5.812549441  | 9.045787508  | 7.429168474  |
| 56660 | -0.352108471 | -0.352108 | -0.352108471 | 5.723485516  | 7.493129927  | 3.953841104  |
| 56672 | 8.67580726   | 7.29644   | 7.986123615  | 7.692191855  | 6.865288895  | 7.278740375  |
| 56675 | 7.936989338  | 8.2060919 | 7.667886768  | 3.644427226  | 9.532381494  | 6.58840436   |
| 56681 | 3.438778715  | 8.361806  | 5.90029238   | 9.802007181  | 5.744687039  | 7.77334711   |
| 56731 | 6.927183976  | 7.1578622 | 7.042523083  | 7.785195405  | 5.212674344  | 6.498934874  |
| 56776 | -0.352108471 | -0.352108 | -0.352108471 | 6.359270363  | 6.107311259  | 6.611229467  |
| 56829 | 6.542351758  | 7.207296  | 5.877407475  | -0.867599802 | 2.049256654  | 4.966113109  |
| 56848 | -0.352108471 | -0.352108 | -0.352108471 | 3.228447668  | 3.337746555  | 3.119148782  |
| 56850 | 5.904400435  | 6.183964  | 6.463527597  | -0.352108471 | -0.352108471 | -0.352108471 |
| 56852 | 8.342713403  | 5.9391922 | 3.53567104   | -0.352108471 | -0.352108471 | -0.352108471 |
| 56882 | 4.587398901  | 5.3920614 | 6.196723817  | 0.044132154  | -0.352108471 | 0.440372779  |
| 56886 | 8.866030478  | 7.7566326 | 6.647234767  | 6.150470235  | 5.784035832  | 5.417601429  |
| 56888 | 7.949620438  | 7.5748406 | 8.324400237  | 6.532441983  | 7.208182247  | 5.85670172   |
| 56889 | -0.352108471 | -0.352108 | -0.352108471 | 5.729212323  | 6.671874638  | 7.614536953  |
| 56890 | -0.352108471 | -0.352108 | -0.352108471 | 3.245625856  | -1.670650613 | 8.161902325  |



|       |              |           |              |              |              |              |
|-------|--------------|-----------|--------------|--------------|--------------|--------------|
| 56891 | -0.352108471 | -0.352108 | -0.352108471 | 4.053861851  | 4.954218546  | 3.153505157  |
| 56893 | -0.352108471 | -0.352108 | -0.352108471 | 6.12990004   | 8.810137628  | 3.449662453  |
| 56894 | 6.888413829  | 7.1985306 | 6.578297075  | 7.078372564  | 6.992640887  | 7.16410424   |
| 56896 | 4.495239923  | 5.4895739 | 6.483907898  | 2.498005078  | 1.348914576  | 3.647095579  |
| 56897 | -0.352108471 | -0.352108 | -0.352108471 | 2.252618212  | 2.252618212  | 2.252618212  |
| 56900 | 5.493783215  | 5.5293114 | 5.458255064  | -0.352108471 | -0.352108471 | -0.352108471 |
| 56902 | 3.734798172  | 5.1134061 | 6.49201397   | 5.982003862  | 6.702640675  | 5.261367049  |
| 56903 | -0.352108471 | -0.352108 | -0.352108471 | 6.204656258  | 5.471446658  | 6.937865858  |
| 56905 | 4.26798078   | 3.3433479 | 3.805664353  | 3.55629917   | 2.301055037  | 1.045810904  |
| 56907 | -0.352108471 | -0.352108 | -0.352108471 | 7.034741548  | 6.192514566  | 7.876968531  |
| 56910 | 6.347551663  | 6.573969  | 6.800386336  | 0.975533543  | 1.14221151   | 0.808855576  |
| 56911 | 1.425625587  | 3.6057696 | 2.515697587  | 0.624614178  | 0.808855576  | 0.440372779  |
| 56915 | -0.352108471 | -0.352108 | -0.352108471 | 4.596219431  | 5.973729281  | 5.284974356  |
| 56917 | 6.414680048  | 7.0260612 | 6.720370627  | 3.516548235  | 3.379219387  | 3.24189054   |
| 56918 | 5.268974051  | 4.617923  | 5.920025058  | 1.12335747   | 1.437859363  | 0.808855576  |
| 56919 | -0.352108471 | -0.352108 | -0.352108471 | 6.929246588  | 6.810957895  | 6.692669202  |
| 56926 | -0.352108471 | -0.352108 | -0.352108471 | 6.840114058  | 7.833237781  | 5.846990336  |
| 56927 | 5.089412202  | 4.2429377 | 5.935886714  | 6.054588057  | 6.537499674  | 6.296043865  |
| 56929 | -0.352108471 | -0.352108 | -0.352108471 | 5.716336945  | 5.458255064  | 5.200173183  |
| 56931 | 6.568734508  | 4.7358084 | 5.652271474  | -0.352108471 | -0.352108471 | -0.352108471 |
| 56937 | -0.352108471 | -0.352108 | -0.352108471 | 1.454941542  | 1.383520155  | 1.312098768  |
| 56938 | 7.635214613  | 8.6109224 | 8.123068514  | 4.479715328  | 7.830397474  | 6.155056401  |
| 56940 | 5.310889134  | 5.871722  | 5.591305588  | -0.352108471 | -0.352108471 | -0.352108471 |
| 56942 | 6.77374078   | 6.7884205 | 6.759061079  | 6.345275458  | 6.355161685  | 6.33538923   |
| 56943 | -0.352108471 | -0.352108 | -0.352108471 | 5.149133629  | 7.663488032  | 6.40631083   |
| 56947 | -0.352108471 | -0.352108 | -0.352108471 | 6.79004344   | 7.667147196  | 5.912939685  |
| 56949 | 5.152247113  | 5.3888412 | 4.915652991  | 3.524795961  | 6.666052015  | 5.095423988  |
| 56951 | -0.352108471 | -0.352108 | -0.352108471 | 7.192715245  | 8.153443131  | 7.673079188  |
| 56965 | -0.352108471 | -0.352108 | -0.352108471 | 9.738071513  | 7.112080183  | 4.486088852  |
| 56970 | -0.352108471 | -0.352108 | -0.352108471 | 0.378404991  | 2.076022254  | 3.773639517  |
| 56975 | -0.352108471 | -0.352108 | -0.352108471 | 8.1791634    | 4.491229415  | 6.335196408  |
| 56984 | -0.352108471 | -0.352108 | -0.352108471 | 5.892395808  | 6.488107881  | 7.083819954  |
| 56985 | 7.219551575  | 4.9620651 | 6.090808341  | -0.352108471 | -0.352108471 | -0.352108471 |
| 56993 | -0.352108471 | -0.352108 | -0.352108471 | 8.161280744  | 6.895919043  | 5.630557342  |
| 56995 | 4.194323704  | 8.8648142 | 6.529568951  | 8.184266684  | 2.852889775  | 5.51857823   |
| 56996 | 6.121528769  | 6.638851  | 5.604206505  | 9.105353393  | 5.923493182  | 2.741632971  |
| 56999 | 6.661698657  | 3.5171257 | 5.089412202  | -0.352108471 | -0.352108471 | -0.352108471 |
| 57000 | 5.262846526  | 7.0993419 | 8.935837271  | 5.849205167  | 5.964599853  | 5.73381048   |
| 57002 | 6.159249072  | 6.3691566 | 6.57906411   | -0.352108471 | -0.352108471 | -0.352108471 |
| 57010 | 6.636606745  | 7.7339872 | 7.185296981  | 6.362981115  | 4.970085925  | 7.755876305  |
| 57016 | 2.016914154  | 1.3393858 | 2.694442482  | 1.963985013  | 1.876861374  | 2.051108653  |
| 57019 | 5.284974356  | 4.6984335 | 5.871515189  | -0.352108471 | -0.352108471 | -0.352108471 |
| 57020 | 4.016045771  | 2.1377449 | 5.894346687  | 4.178899946  | 4.50328921   | 3.854510681  |
| 57035 | -0.352108471 | -0.352108 | -0.352108471 | 10.78499251  | 2.115613166  | 6.450302837  |
| 57037 | -0.352108471 | -0.352108 | -0.352108471 | 5.590609441  | 6.32531018   | 7.06001092   |
| 57045 | 7.998944175  | 7.5029595 | 7.750951825  | 4.80208491   | 4.843308497  | 4.760861323  |
| 57060 | -0.352108471 | -0.352108 | -0.352108471 | 3.6498283    | 5.44897977   | 7.248131241  |

|       |              |           |              |              |              |              |
|-------|--------------|-----------|--------------|--------------|--------------|--------------|
| 57062 | 7.751434144  | 6.3753935 | 7.063413806  | 5.760537073  | 4.941360883  | 6.579713263  |
| 57085 | -0.352108471 | -0.352108 | -0.352108471 | 5.583895223  | 6.056053999  | 6.528212775  |
| 57092 | -0.352108471 | -0.352108 | -0.352108471 | 6.609543024  | 6.63062078   | 6.588465267  |
| 57095 | -0.352108471 | -0.352108 | -0.352108471 | 6.296043865  | 3.846057035  | 8.746030696  |
| 57097 | 6.788976801  | 6.6215439 | 6.956409727  | 0.598807818  | 1.549724107  | -0.352108471 |
| 57103 | 5.020587291  | 10.251788 | 7.63618745   | 5.985264703  | 6.344036917  | 5.626492488  |
| 57104 | 8.69926147   | 6.9129933 | 5.12672522   | 7.262894302  | 7.727171758  | 7.49503303   |
| 57106 | -0.352108471 | -0.352108 | -0.352108471 | 4.989921879  | 3.605356286  | 4.297639083  |
| 57107 | 7.1144378    | 7.9945597 | 6.234315922  | 8.990114606  | 4.961525982  | 6.975820294  |
| 57115 | 4.288635999  | 6.1463463 | 5.217491139  | -0.352108471 | -0.352108471 | -0.352108471 |
| 57116 | -0.352108471 | -0.352108 | -0.352108471 | 2.73496259   | 2.564345668  | 2.393728747  |
| 57118 | 9.387374614  | 9.2732507 | 9.159126777  | 7.775347331  | 8.514546855  | 9.253746379  |
| 57124 | 10.53233641  | 8.2529058 | 9.392621122  | 9.571938236  | 9.909145     | 10.24635177  |
| 57125 | 4.684878868  | 4.2452143 | 5.124543452  | 1.804300246  | 1.876861374  | 1.731739118  |
| 57128 | -0.352108471 | -0.352108 | -0.352108471 | 5.791067154  | 5.931810751  | 6.072554349  |
| 57129 | -0.352108471 | -0.352108 | -0.352108471 | 8.692481662  | 3.77936066   | 6.235921161  |
| 57130 | 4.750902969  | 5.413918  | 6.076932934  | 7.041674609  | 6.868895554  | 6.696116498  |
| 57132 | 7.153084345  | 7.9574774 | 7.555280876  | 9.042582091  | 5.008712344  | 7.025647217  |
| 57134 | 3.195693796  | 6.1702349 | 4.682964349  | 5.536964019  | -0.478069171 | 2.529447424  |
| 57136 | -0.352108471 | -0.352108 | -0.352108471 | 7.160134469  | 4.759802167  | 9.560466772  |
| 57140 | 3.150687521  | 3.1047882 | 3.127737875  | 8.571428111  | 5.850091509  | 7.21075981   |
| 57142 | 7.049307119  | 7.5261472 | 8.002987274  | 7.661917043  | 8.056397728  | 8.450878413  |
| 57146 | 5.874321292  | 3.7994131 | 4.83686721   | 0.440372779  | 0.440372779  | 0.440372779  |
| 57148 | -0.352108471 | -0.352108 | -0.352108471 | 5.760537073  | 6.39629716   | 5.124776985  |
| 57149 | -0.352108471 | -0.352108 | -0.352108471 | 5.807462027  | 6.039524337  | 5.923493182  |
| 57153 | 5.688622647  | 6.5809064 | 4.796338895  | 8.362467561  | 8.919206195  | 8.640836878  |
| 57157 | -0.352108471 | -0.352108 | -0.352108471 | 5.195273529  | 8.105285791  | 6.65027966   |
| 57158 | -0.352108471 | -0.352108 | -0.352108471 | 6.837787178  | 7.350906735  | 7.094346957  |
| 57162 | -0.352108471 | -0.352108 | -0.352108471 | 7.657842008  | 3.330992345  | 5.494417177  |
| 57169 | 6.830732744  | 6.7884205 | 6.873045007  | 6.226457505  | 5.893442277  | 6.559472732  |
| 57175 | 5.852937462  | 8.4123056 | 3.293569273  | 9.955761578  | 4.980650259  | 7.468205918  |
| 57176 | -0.352108471 | -0.352108 | -0.352108471 | 5.490522765  | 8.323539808  | 2.657505722  |
| 57178 | 4.596401634  | 3.898201  | 5.294602254  | 7.177031742  | 7.333182908  | 7.020880576  |
| 57179 | 4.228795565  | 5.3537904 | 6.478785198  | 5.540133168  | 6.787320335  | 8.034507502  |
| 57181 | -0.352108471 | -0.352108 | -0.352108471 | 5.923493182  | 6.748776523  | 5.098209841  |
| 57182 | -0.352108471 | -0.352108 | -0.352108471 | 5.412561087  | 5.178905519  | 5.646216656  |
| 57184 | 2.844361502  | 7.7255872 | 5.284974356  | -0.352108471 | -0.352108471 | -0.352108471 |
| 57186 | 4.792303669  | 4.8304259 | 4.754181416  | -0.352108471 | -0.352108471 | -0.352108471 |
| 57188 | -0.352108471 | -0.352108 | -0.352108471 | 4.172489362  | 7.674497003  | 5.923493182  |
| 57190 | 7.203901872  | 6.7884205 | 7.619383264  | 7.445326447  | 7.407655215  | 7.482997679  |
| 57191 | -0.352108471 | -0.352108 | -0.352108471 | 5.575983727  | 5.588224375  | 5.563743079  |
| 57194 | 4.007024518  | 7.0634138 | 10.11980309  | -0.352108471 | -0.352108471 | -0.352108471 |
| 57198 | 5.775231583  | 7.1708612 | 4.379601939  | 6.148282339  | 7.800049293  | 6.974165816  |
| 57205 | -0.352108471 | -0.352108 | -0.352108471 | 3.910289569  | 6.680573626  | 5.295431597  |
| 57212 | 7.629736298  | 1.8786265 | 4.754181416  | 6.072777462  | 6.369156591  | 6.665535719  |
| 57213 | 5.973512349  | 1.6378164 | 3.805664353  | 1.569894481  | 1.14221151   | 1.997577452  |
| 57214 | 6.720370627  | 5.6995671 | 7.741174168  | 7.143425013  | 9.985344146  | 4.30150588   |

|       |              |           |              |              |              |              |
|-------|--------------|-----------|--------------|--------------|--------------|--------------|
| 57215 | 6.151585628  | 6.471882  | 5.831289264  | -0.352108471 | -0.352108471 | -0.352108471 |
| 57217 | 6.414258136  | 4.4541887 | 8.374327612  | -0.352108471 | -0.352108471 | -0.352108471 |
| 57221 | 5.156254332  | 5.0163053 | 4.876356332  | 1.245740716  | 0.440372779  | 2.051108653  |
| 57222 | 7.676052938  | 8.7086427 | 6.643463199  | 7.849779623  | 7.944725202  | 7.754834044  |
| 57223 | 3.255652739  | 5.2347758 | 4.245214285  | 7.962328903  | 7.063710467  | 6.165092031  |
| 57226 | 4.77115143   | 6.199679  | 7.628206623  | 0.624614178  | 0.440372779  | 0.808855576  |
| 57228 | -0.352108471 | -0.352108 | -0.352108471 | 6.908576198  | 6.031941504  | 6.470258851  |
| 57231 | 6.705287512  | 8.6366275 | 4.773947538  | -0.352108471 | -0.352108471 | -0.352108471 |
| 57282 | 6.659357577  | 5.8100237 | 4.960689758  | -0.352108471 | -0.352108471 | -0.352108471 |
| 57291 | -0.352108471 | -0.352108 | -0.352108471 | 5.55876787   | 5.588224375  | 5.529311366  |
| 57332 | 6.926558783  | 7.2740737 | 6.579043871  | -0.352108471 | -0.352108471 | -0.352108471 |
| 57333 | 7.3241242    | 8.1805061 | 6.467742289  | 10.7441747   | 8.20469834   | 5.665221975  |
| 57335 | 6.262287306  | 4.9223212 | 7.602253373  | 1.382911631  | 4.404446118  | 2.893678875  |
| 57336 | 5.355578954  | 5.2849744 | 5.214369758  | -0.352108471 | -0.352108471 | -0.352108471 |
| 57379 | 6.133259832  | 6.0384535 | 5.94364719   | 2.094444132  | 1.061335674  | 3.127552591  |
| 57396 | -0.352108471 | -0.352108 | -0.352108471 | 4.857389821  | 4.617382386  | 4.377374952  |
| 57403 | 7.135878474  | 5.1818534 | 6.158865923  | 3.279366281  | 4.119353161  | 3.699359721  |
| 57404 | 7.725216026  | 8.73717   | 6.713262076  | 6.552438858  | 5.867779085  | 5.183119313  |
| 57407 | -0.352108471 | -0.352108 | -0.352108471 | 4.943117462  | 4.482692559  | 5.403542364  |
| 57410 | 5.625160771  | 3.3533372 | 7.896984319  | 6.245077194  | 6.731591845  | 6.48833452   |
| 57412 | 6.139657808  | 7.3820603 | 4.897255357  | 1.622488375  | 1.305230684  | 1.939746065  |
| 57414 | -0.352108471 | -0.352108 | -0.352108471 | 3.119148782  | 5.779327167  | 0.458970397  |
| 57418 | -0.352108471 | -0.352108 | -0.352108471 | 6.415928975  | 6.429470164  | 6.402387785  |
| 57419 | -0.352108471 | -0.352108 | -0.352108471 | 6.619715506  | 5.372018247  | 5.995866876  |
| 57446 | 6.477960335  | 5.7956554 | 6.136807855  | 4.054306507  | 4.791487661  | 5.528668814  |
| 57448 | -0.352108471 | -0.352108 | -0.352108471 | 4.705495341  | 7.693862712  | 6.199679026  |
| 57449 | 4.460216147  | 7.933593  | 6.196904592  | -0.352108471 | -0.352108471 | -0.352108471 |
| 57452 | -0.352108471 | -0.352108 | -0.352108471 | 5.983736712  | 8.331429035  | 3.636044389  |
| 57453 | -0.352108471 | -0.352108 | -0.352108471 | 5.095423988  | 0.664917151  | 9.525930825  |
| 57455 | 2.685732087  | 1.7810365 | 3.590427691  | 1.493791735  | 0.041890574  | 2.945692896  |
| 57458 | 6.537383725  | 6.5498529 | 6.524914536  | -0.352108471 | -0.352108471 | -0.352108471 |
| 57460 | -0.352108471 | -0.352108 | -0.352108471 | 5.244637527  | 2.629274231  | 3.936955879  |
| 57461 | 7.134542387  | 5.6592789 | 4.184015356  | 0.395051519  | 1.14221151   | -0.352108471 |
| 57462 | 9.949345649  | 6.9586256 | 8.453985612  | 5.580270995  | 10.73871764  | 8.159494318  |
| 57465 | 7.460743135  | 7.4538415 | 7.457292337  | 6.000797316  | 6.886095759  | 7.771394202  |
| 57466 | -0.352108471 | -0.352108 | -0.352108471 | 7.66030187   | 5.842630242  | 6.751466056  |
| 57467 | 2.736529761  | 5.825168  | -0.352108471 | -0.352108471 | -0.352108471 | -0.352108471 |
| 57469 | 6.590508304  | 6.6215439 | 6.559472732  | -0.352108471 | -0.352108471 | -0.352108471 |
| 57470 | -0.352108471 | -0.352108 | -0.352108471 | 3.228447668  | 3.337746555  | 3.119148782  |
| 57472 | 8.784927056  | 3.0156577 | 5.90029238   | -0.352108471 | -0.352108471 | -0.352108471 |
| 57473 | 6.623540933  | 5.8259521 | 7.421129737  | 3.59721797   | 1.939746065  | 5.254689875  |
| 57474 | 11.05034992  | 7.9257518 | 9.488050876  | 8.832773341  | 7.149285957  | 7.991029649  |
| 57475 | 7.8651478    | 7.1785025 | 6.491857255  | 5.264042908  | 4.335695815  | 6.19239      |
| 57476 | -0.352108471 | -0.352108 | -0.352108471 | 3.53404206   | 2.648346333  | 4.419737788  |
| 57478 | 7.484018122  | 6.0163629 | 8.951673352  | -0.352108471 | -0.352108471 | -0.352108471 |
| 57479 | -0.352108471 | -0.352108 | -0.352108471 | 5.635342591  | 6.893972732  | 8.152602872  |
| 57480 | 7.305107368  | 5.882695  | 8.72751969   | 1.12335747   | 0.808855576  | 1.437859363  |

|       |              |           |              |              |              |              |
|-------|--------------|-----------|--------------|--------------|--------------|--------------|
| 57484 | 5.688622647  | 6.5370661 | 4.840179172  | -0.352108471 | -0.352108471 | -0.352108471 |
| 57486 | 6.554662822  | 5.5701821 | 7.539143545  | 3.424613542  | 6.056569455  | 8.688525369  |
| 57488 | 5.201388631  | 10.992924 | 8.097156385  | 7.350816905  | 6.494630027  | 5.638443149  |
| 57489 | -0.352108471 | -0.352108 | -0.352108471 | 5.088336947  | 3.119148782  | 1.149960616  |
| 57491 | -0.352108471 | -0.352108 | -0.352108471 | 6.712406125  | 7.168934463  | 6.255877787  |
| 57492 | 3.312874463  | 4.3155755 | 5.318276601  | 6.074265544  | 4.637194169  | 3.200122793  |
| 57493 | 7.313984131  | 8.9694604 | 5.658507909  | 6.758264767  | 5.095423988  | 3.432583208  |
| 57497 | -0.352108471 | -0.352108 | -0.352108471 | 6.450302837  | 7.074778174  | 5.825827501  |
| 57506 | 5.481187704  | 9.9669721 | 7.724079888  | 7.043436743  | 7.166024253  | 6.920849233  |
| 57507 | 6.769503656  | 4.0146191 | 5.392061359  | 1.968661759  | 1.997577452  | 1.939746065  |
| 57514 | 7.262874357  | 7.2305473 | 7.29520141   | 6.149337851  | 6.174080069  | 6.124595632  |
| 57515 | 6.75496194   | 5.2200029 | 8.289920969  | 8.144699842  | 7.596913147  | 7.049126453  |
| 57520 | 5.38675695   | 5.3152588 | 5.458255064  | -0.352108471 | -0.352108471 | -0.352108471 |
| 57522 | 5.678165805  | 4.0643007 | 4.871233248  | 8.147100384  | 1.810859062  | 4.978979723  |
| 57523 | 4.83686721   | 4.501577  | 5.172157411  | -0.352108471 | -0.352108471 | -0.352108471 |
| 57530 | 5.089412202  | 5.1245435 | 5.054280952  | -0.352108471 | -0.352108471 | -0.352108471 |
| 57532 | 1.383520155  | 1.3456902 | 1.421350154  | 5.883240199  | 8.808883933  | 7.346062066  |
| 57535 | 7.805651168  | 8.4889447 | 9.172238201  | 7.57369926   | 6.156805352  | 6.865252306  |
| 57536 | -0.352108471 | -0.352108 | -0.352108471 | 4.125531621  | 4.993866775  | 4.559699198  |
| 57538 | 7.255495739  | 6.8312892 | 6.407082676  | -0.352108471 | -0.352108471 | -0.352108471 |
| 57542 | 7.634810206  | 6.767634  | 5.900457851  | 0.939116071  | 0.440372779  | 1.437859363  |
| 57545 | 3.320927332  | 5.3920006 | 7.463073909  | -0.352108471 | -0.352108471 | -0.352108471 |
| 57546 | 8.293737092  | 8.305847  | 8.299792057  | 10.21722217  | 5.221321141  | 7.719271656  |
| 57551 | 5.398838658  | 6.2738323 | 7.14882586   | 6.296043865  | 6.225411528  | 6.366676203  |
| 57552 | 6.682350247  | 5.2783178 | 5.980334028  | 2.847531327  | 0.440372779  | 5.254689875  |
| 57553 | 8.699553643  | 6.1215288 | 3.543503895  | 2.55987745   | 4.975088963  | 3.767483207  |
| 57555 | 7.351870863  | 7.352529  | 7.351212697  | 6.001809131  | 6.038453511  | 5.965164752  |
| 57559 | 8.072934799  | 6.1014309 | 7.08718283   | -0.352108471 | -0.352108471 | -0.352108471 |
| 57560 | 6.913488898  | 5.0649925 | 8.761985317  | -0.352108471 | -0.352108471 | -0.352108471 |
| 57561 | -0.352108471 | -0.352108 | -0.352108471 | 5.458255064  | 5.314371021  | 5.602139107  |
| 57562 | 6.537146105  | 6.3152311 | 6.759061079  | 6.796814879  | 6.813225323  | 6.780404436  |
| 57563 | 4.898255012  | 5.6148381 | 6.331421246  | 1.964002179  | 3.119148782  | 0.808855576  |
| 57567 | 4.978158736  | 6.2125362 | 7.446913681  | -0.352108471 | -0.352108471 | -0.352108471 |
| 57571 | 5.354685649  | 5.3835036 | 5.325867653  | -0.352108471 | -0.352108471 | -0.352108471 |
| 57573 | 10.1689822   | 10.20259  | 10.13537444  | 8.645875762  | 5.934364674  | 11.35738685  |
| 57574 | 6.55187204   | 6.4453648 | 6.658379305  | 5.723485516  | 5.731413688  | 5.715557343  |
| 57582 | 6.262394126  | 5.6224344 | 4.982474583  | 0.289051906  | -0.352108471 | 0.930212283  |
| 57583 | 5.191969759  | 6.1969436 | 5.694456662  | 0.808855576  | 0.808855576  | 0.808855576  |
| 57584 | 10.23560443  | 4.6321238 | 7.433864099  | -0.352108471 | -0.352108471 | -0.352108471 |
| 57585 | 4.714702999  | 5.4937832 | 6.272863431  | 4.065454755  | 7.78153161   | 5.923493182  |
| 57586 | 2.140287079  | 5.3264422 | 3.733364623  | 2.776179788  | 2.881761131  | 2.670598445  |
| 57587 | 7.592570356  | 7.7938865 | 7.391254223  | 7.550822982  | 7.603251574  | 7.49839439   |
| 57591 | 3.80405037   | 3.8072783 | 3.805664353  | 6.675159846  | 6.905677231  | 6.444642462  |
| 57594 | 3.280486615  | 10.223041 | 6.75176365   | 5.047004585  | 3.70308637   | 2.359168155  |
| 57595 | -0.352108471 | -0.352108 | -0.352108471 | 6.15007306   | 5.775231583  | 6.524914536  |
| 57596 | 5.354685649  | 5.3835036 | 5.325867653  | -0.352108471 | -0.352108471 | -0.352108471 |
| 57599 | 6.470581262  | 3.8677344 | 5.169157826  | -0.352108471 | -0.352108471 | -0.352108471 |

|       |              |           |              |              |              |              |
|-------|--------------|-----------|--------------|--------------|--------------|--------------|
| 57602 | -0.352108471 | -0.352108 | -0.352108471 | 5.675863648  | 6.499425261  | 6.087644454  |
| 57604 | 11.14795557  | 7.2688675 | 3.389779407  | 5.479099849  | 7.624975512  | 6.55203768   |
| 57606 | 5.652254201  | 6.1923204 | 6.732386524  | 4.456886199  | 4.482692559  | 4.43107984   |
| 57608 | 6.977258204  | 7.220849  | 6.733667396  | -0.352108471 | -0.352108471 | -0.352108471 |
| 57609 | 6.334127991  | 5.5587679 | 4.783407749  | -0.352108471 | -0.352108471 | -0.352108471 |
| 57611 | 7.174096023  | 6.0203811 | 4.86666616   | 1.935165301  | 0.151687366  | 1.043426334  |
| 57613 | 6.269206667  | 3.991667  | 8.546746304  | 6.598490492  | 4.997626553  | 5.798058523  |
| 57615 | 7.480440003  | 8.0484881 | 8.616536154  | 6.687409375  | 5.405185664  | 7.969633085  |
| 57617 | 6.774139572  | 6.3968684 | 6.019597193  | 7.289078056  | 9.390152264  | 5.188003847  |
| 57619 | 7.04456855   | 4.2290497 | 5.636809111  | -0.352108471 | -0.352108471 | -0.352108471 |
| 57620 | 7.546524525  | 4.8214035 | 6.183964016  | -0.352108471 | -0.352108471 | -0.352108471 |
| 57621 | 7.218932222  | 3.2160501 | 5.217491139  | -0.352108471 | -0.352108471 | -0.352108471 |
| 57623 | 2.621772913  | 2.2060694 | 2.413921152  | 5.958359385  | 7.451412154  | 4.465306615  |
| 57624 | -0.352108471 | -0.352108 | -0.352108471 | 5.958359385  | 5.958359385  | 5.958359385  |
| 57630 | 5.292183578  | 6.9134889 | 8.534794219  | -0.352108471 | -0.352108471 | -0.352108471 |
| 57633 | 5.428393874  | 3.9261994 | 6.930588353  | -0.352108471 | -0.352108471 | -0.352108471 |
| 57634 | 6.234419216  | 6.5021238 | 6.769828314  | 6.12990004   | 5.547614426  | 6.712185655  |
| 57636 | 6.183753922  | 8.2977819 | 7.240767906  | 6.840114058  | 7.529013824  | 6.151214292  |
| 57643 | 3.486368175  | 2.4139212 | 1.341474129  | 5.335209685  | 7.565046041  | 3.105373328  |
| 57646 | -0.352108471 | -0.352108 | -0.352108471 | 6.366776401  | 6.392114231  | 6.341438571  |
| 57647 | -0.352108471 | -0.352108 | -0.352108471 | 7.852268327  | 4.461252742  | 6.156760535  |
| 57649 | 5.152247113  | 5.1799508 | 5.124543452  | -0.352108471 | -0.352108471 | -0.352108471 |
| 57658 | 7.034930127  | 5.9629396 | 6.498934874  | 5.232499485  | 6.344802955  | 5.78865122   |
| 57659 | 6.095486511  | 4.6929891 | 3.290491727  | 8.696440088  | 4.343505502  | 6.519972795  |
| 57661 | -0.352108471 | -0.352108 | -0.352108471 | 8.059424863  | 3.520100589  | 5.789762726  |
| 57665 | 2.239158726  | 0.4653926 | 4.01292488   | -0.352108471 | -0.352108471 | -0.352108471 |
| 57666 | 7.062672095  | 7.1689345 | 6.956409727  | -0.352108471 | -0.352108471 | -0.352108471 |
| 57669 | 6.42925664   | 3.6050162 | 5.017136436  | -0.352108471 | -0.352108471 | -0.352108471 |
| 57674 | 6.720598625  | 5.4528725 | 7.98832475   | 6.999651261  | 6.849024193  | 6.698397125  |
| 57679 | -0.352108471 | -0.352108 | -0.352108471 | 6.713776402  | 9.484284184  | 3.94326862   |
| 57680 | -0.352108471 | -0.352108 | -0.352108471 | 7.349994721  | 6.472017122  | 5.594039522  |
| 57683 | 6.564883227  | 6.4665022 | 6.368121182  | 1.12335747   | 0.808855576  | 1.437859363  |
| 57687 | 5.870080727  | 6.8682325 | 6.369156591  | -0.352108471 | -0.352108471 | -0.352108471 |
| 57688 | 5.639271032  | 6.1075388 | 6.57580657   | 7.725173814  | 6.474238624  | 7.099706219  |
| 57693 | -0.352108471 | -0.352108 | -0.352108471 | 5.923493182  | 3.483613141  | 8.363373224  |
| 57696 | 7.435794968  | 5.1710352 | 6.303415073  | -0.352108471 | -0.352108471 | -0.352108471 |
| 57701 | 6.183964016  | 6.1999612 | 6.167966808  | 5.88700099   | 5.893442277  | 5.880559702  |
| 57703 | 5.852937462  | 5.873346  | 5.832528937  | -0.352108471 | -0.352108471 | -0.352108471 |
| 57704 | 5.780555051  | 6.7671095 | 6.273832259  | -0.352108471 | -0.352108471 | -0.352108471 |
| 57707 | 5.645917886  | 6.6142706 | 7.582623214  | 5.299668551  | 5.767479853  | 6.235291155  |
| 57709 | -0.352108471 | -0.352108 | -0.352108471 | 0.940233577  | 2.232575625  | -0.352108471 |
| 57710 | 6.641264752  | 7.244076  | 6.038453511  | 5.774127426  | 5.926961306  | 5.621293547  |
| 57711 | 3.636824788  | 3.3494067 | 3.924242887  | 1.403216514  | 1.727071877  | 1.079361152  |
| 57713 | 4.716952933  | 8.2920796 | 6.504516254  | 8.367462895  | 3.961113643  | 6.164288269  |
| 57720 | 8.954808956  | 6.3404241 | 7.64761654   | 0.624614178  | 0.808855576  | 0.440372779  |
| 57722 | 5.314533813  | 4.9899604 | 5.152247113  | -0.352108471 | -0.352108471 | -0.352108471 |
| 57724 | -0.352108471 | -0.352108 | -0.352108471 | 6.912349504  | 4.555995245  | 5.734172375  |

|       |              |           |              |              |              |              |
|-------|--------------|-----------|--------------|--------------|--------------|--------------|
| 57731 | -0.352108471 | -0.352108 | -0.352108471 | 5.600955507  | 5.412561087  | 5.224166668  |
| 57761 | 5.217491139  | 5.6588972 | 4.776085034  | 4.121550341  | 3.501080718  | 4.742019963  |
| 57787 | -0.352108471 | -0.352108 | -0.352108471 | 6.908633468  | 7.318948842  | 7.729264217  |
| 57798 | 7.644075882  | 8.6774638 | 8.160769863  | 7.039551591  | 7.739290074  | 6.339813108  |
| 57801 | 9.148553976  | 6.3034612 | 3.458368513  | -0.352108471 | -0.352108471 | -0.352108471 |
| 57804 | 5.440913558  | 7.9747332 | 10.50855278  | 7.784173954  | 5.639964005  | 6.712068979  |
| 57805 | -0.352108471 | -0.352108 | -0.352108471 | 6.936660808  | 7.217419545  | 6.655902072  |
| 57819 | 5.911656798  | 6.5905083 | 7.26935981   | -0.352108471 | -0.352108471 | -0.352108471 |
| 57824 | 2.313941724  | 3.1433048 | 1.484578692  | -0.352108471 | -0.352108471 | -0.352108471 |
| 57826 | 2.436716207  | 4.0537544 | 3.245235305  | 6.180373585  | 8.76687395   | 3.593873219  |
| 57835 | 5.837198182  | 6.8224388 | 4.851957573  | 3.87211091   | 6.114937456  | 1.629284364  |
| 57862 | 3.117396088  | 4.2010992 | 5.284802407  | 6.08233239   | 6.498042382  | 6.290187386  |
| 57864 | 4.998688086  | 7.5489764 | 6.273832259  | -0.352108471 | -0.352108471 | -0.352108471 |
| 58155 | -0.352108471 | -0.352108 | -0.352108471 | 3.585121301  | 7.265262643  | -0.095020041 |
| 58157 | -0.352108471 | -0.352108 | -0.352108471 | 3.384482817  | 3.615460478  | 3.153505157  |
| 58160 | -0.352108471 | -0.352108 | -0.352108471 | 2.065292044  | 4.482692559  | -0.352108471 |
| 58189 | 6.573968999  | 9.4943801 | 3.6535579    | 5.368985197  | 5.095423988  | 4.821862779  |
| 58190 | 3.515141236  | 5.9565521 | 1.07373037   | 5.723485516  | 3.702945908  | 7.744025123  |
| 58472 | -0.352108471 | -0.352108 | -0.352108471 | 6.250282655  | 6.081458557  | 6.165870606  |
| 58475 | 2.896293591  | 6.7443331 | 4.820313327  | 1.825329981  | 2.100935855  | 1.549724107  |
| 58476 | -0.352108471 | -0.352108 | -0.352108471 | 7.375497935  | 8.578655479  | 7.977076707  |
| 58477 | -0.352108471 | -0.352108 | -0.352108471 | 5.657493881  | 7.776478226  | 3.538509535  |
| 58485 | -0.352108471 | -0.352108 | -0.352108471 | 7.364389464  | 7.386082653  | 7.342696275  |
| 58490 | 6.020381091  | 5.2555426 | 6.785219545  | -0.352108471 | -0.352108471 | -0.352108471 |
| 58493 | 6.32682969   | 8.3367008 | 7.331765268  | 5.247026494  | 3.700559908  | 2.154093323  |
| 58494 | 6.81568939   | 6.6788995 | 6.747294441  | 2.546625611  | 1.939746065  | 3.153505157  |
| 58497 | 5.7425783    | 4.8270489 | 5.284813592  | -0.352108471 | -0.352108471 | -0.352108471 |
| 58499 | 6.166257062  | 6.9471227 | 6.556689902  | -0.352108471 | -0.352108471 | -0.352108471 |
| 58500 | 6.285494677  | 6.9148456 | 6.600170153  | 3.793686399  | 5.591305588  | 7.388924778  |
| 58504 | 6.147197569  | 5.5587679 | 4.970338171  | -0.352108471 | -0.352108471 | -0.352108471 |
| 58505 | 6.234628092  | 4.8786655 | 3.522702864  | 0.920492535  | 3.245625856  | 5.570759177  |
| 58506 | 8.407301102  | 4.3584459 | 6.382873477  | 7.702721441  | 8.377575324  | 9.052429207  |
| 58508 | -0.352108471 | -0.352108 | -0.352108471 | 1.806061184  | 5.575983727  | 9.345906269  |
| 58516 | 6.40271776   | 7.9426509 | 9.482584113  | 2.06022916   | 1.848794271  | 1.637359382  |
| 58517 | 5.800199788  | 8.4195016 | 3.180897966  | 4.182387884  | 6.345315925  | 5.263851904  |
| 58526 | -0.352108471 | -0.352108 | -0.352108471 | 10.58638679  | 4.520706318  | 7.553546556  |
| 58527 | 1.66201518   | 0.1499869 | 3.174043454  | 3.174536588  | 2.655229797  | 2.135923007  |
| 58528 | -0.352108471 | -0.352108 | -0.352108471 | 6.047498583  | 0.884777956  | 3.46613827   |
| 58533 | 10.49052215  | 7.3981936 | 4.305865088  | 6.235921161  | 6.351526092  | 6.12031623   |
| 58985 | -0.352108471 | -0.352108 | -0.352108471 | 1.783698732  | -1.314499333 | 4.881896797  |
| 58986 | 6.815350011  | 6.502263  | 6.189176046  | 7.707102448  | 7.731338116  | 7.682866779  |
| 59274 | 7.548473852  | 5.1898393 | 6.369156591  | 7.581174592  | 7.289078056  | 6.996981519  |
| 59277 | 2.772692854  | 5.2174911 | 7.662289424  | -0.352108471 | -0.352108471 | -0.352108471 |
| 59283 | 6.32247105   | 6.3831515 | 6.261790604  | 6.32450851   | 6.246629235  | 6.402387785  |
| 59285 | 4.587224297  | 4.1637749 | 3.740325419  | -0.352108471 | -0.352108471 | -0.352108471 |
| 59286 | 6.801813774  | 6.7710365 | 6.832590998  | -0.352108471 | -0.352108471 | -0.352108471 |
| 59338 | 4.911650208  | 7.006006  | 2.817294404  | 2.78581638   | 4.885343373  | 3.835579877  |



|       |              |           |              |              |              |              |
|-------|--------------|-----------|--------------|--------------|--------------|--------------|
| 59339 | 5.595865775  | 5.8522299 | 6.1085941    | 6.697621258  | 8.469023497  | 4.92621902   |
| 59340 | 4.656717726  | 5.7256773 | 3.587758183  | 2.640854735  | 3.27996028   | 3.919065824  |
| 59349 | -0.352108471 | -0.352108 | -0.352108471 | 7.20924711   | 6.990165328  | 7.099706219  |
| 60312 | 3.977894487  | 4.5378201 | 5.09774572   | 5.339363025  | 9.044441178  | 7.191902102  |
| 60313 | 6.537383725  | 6.8266121 | 6.248155349  | 5.174103199  | 5.760537073  | 6.346970947  |
| 60314 | -0.352108471 | -0.352108 | -0.352108471 | 6.396868383  | 6.410585269  | 6.383151496  |
| 60412 | -0.352108471 | -0.352108 | -0.352108471 | 5.789762726  | 5.804293869  | 5.775231583  |
| 60436 | 9.533345056  | 6.8022253 | 4.071105627  | 0.044132154  | -0.352108471 | 0.440372779  |
| 60481 | -0.352108471 | -0.352108 | -0.352108471 | 7.577433573  | 3.161230604  | 5.369332089  |
| 60487 | -0.352108471 | -0.352108 | -0.352108471 | 6.577483275  | 7.86280741   | 5.292159141  |
| 60490 | -0.352108471 | -0.352108 | -0.352108471 | 5.775068216  | 4.765707108  | 6.784429323  |
| 60491 | 7.639511791  | 6.1515856 | 4.663659466  | -0.352108471 | -0.352108471 | -0.352108471 |
| 60492 | 8.603707241  | 8.8371526 | 8.370261881  | 5.973500237  | 5.873345987  | 6.073654487  |
| 60493 | 1.392109249  | 1.5880026 | 1.196215903  | 6.045783324  | 5.845499835  | 5.645216346  |
| 60526 | -0.352108471 | -0.352108 | -0.352108471 | 6.752184247  | 5.760537073  | 4.768889898  |
| 60528 | 5.745277164  | 6.5373837 | 7.329490285  | -0.352108471 | -0.352108471 | -0.352108471 |
| 60558 | 6.114367042  | 5.4937832 | 4.873199387  | 4.178899946  | 7.074324057  | 1.283475834  |
| 60559 | 6.065707629  | 6.8767254 | 5.254689875  | 7.785987102  | 7.827584812  | 7.744389392  |
| 60560 | 6.090808341  | 6.1079622 | 6.073654487  | -0.352108471 | -0.352108471 | -0.352108471 |
| 60592 | 6.242048279  | 4.5278264 | 7.956270112  | -0.352108471 | -0.352108471 | -0.352108471 |
| 60626 | 7.466207166  | 7.474041  | 7.458373336  | 6.735779686  | 6.750862801  | 6.720696571  |
| 60672 | -0.352108471 | -0.352108 | -0.352108471 | 8.325134299  | 5.233567424  | 2.142000548  |
| 60673 | 5.652870912  | 9.5334287 | 7.593149813  | 7.212946788  | 6.450302837  | 5.687658887  |
| 60678 | -0.352108471 | -0.352108 | -0.352108471 | 4.161183828  | 8.310658494  | 6.235921161  |
| 60681 | 7.089794111  | 7.7423759 | 8.394957618  | 6.241870568  | 10.45440747  | 8.348139018  |
| 60685 | 3.140892121  | 3.1277379 | 3.114583629  | 9.959656043  | 5.695375042  | 7.827515543  |
| 63875 | 4.165056742  | 6.6073775 | 9.049698176  | 6.275406712  | 8.463204971  | 7.369305842  |
| 63876 | -0.352108471 | -0.352108 | -0.352108471 | 0.830820342  | 3.355865518  | 5.880910695  |
| 63891 | -0.352108471 | -0.352108 | -0.352108471 | 6.022393352  | 6.668157563  | 6.345275458  |
| 63895 | 6.090808341  | 9.1352748 | 3.04634185   | -0.352108471 | -0.352108471 | -0.352108471 |
| 63897 | -0.352108471 | -0.352108 | -0.352108471 | 4.307390425  | 6.431273752  | 5.369332089  |
| 63898 | 6.433318728  | 6.4453648 | 6.421272681  | -0.352108471 | -0.352108471 | -0.352108471 |
| 63901 | 6.996816126  | 3.7304858 | 10.26314646  | 3.496718474  | -0.686712309 | 7.680149257  |
| 63905 | 5.294336754  | 5.1522471 | 5.010157472  | 5.614929861  | 7.347612652  | 9.080295444  |
| 63908 | -0.352108471 | -0.352108 | -0.352108471 | 2.204376426  | -0.352108471 | 4.760861323  |
| 63916 | -0.352108471 | -0.352108 | -0.352108471 | 7.357359337  | 11.69849342  | 3.016225257  |
| 63917 | 7.482027287  | 6.1955411 | 4.909054948  | 6.824147952  | 6.845389604  | 6.802906299  |
| 63923 | 5.688622647  | 4.6402083 | 6.737037001  | -0.352108471 | -0.352108471 | -0.352108471 |
| 63925 | -0.352108471 | -0.352108 | -0.352108471 | 5.824288785  | 5.608716946  | 6.039860624  |
| 63928 | 4.646989744  | 7.0614187 | 9.475847744  | 2.845098058  | 3.5616058    | 4.278113542  |
| 63929 | 6.887774551  | 8.8769145 | 10.86605448  | 10.14841176  | 8.132941777  | 6.117471795  |
| 63932 | 8.707241083  | 7.4451024 | 8.076171744  | 7.282430292  | 7.856913531  | 7.569671911  |
| 63933 | 7.422618389  | 8.1578931 | 7.790255725  | 6.585211616  | 5.271561728  | 7.898861504  |
| 63935 | -0.352108471 | -0.352108 | -0.352108471 | 4.456886199  | 6.016705236  | 2.897067163  |
| 63939 | 6.939918434  | 7.2682981 | 6.611538781  | 8.383495281  | 7.395881893  | 6.408268504  |
| 63940 | -0.352108471 | -0.352108 | -0.352108471 | 7.435582094  | 5.55876787   | 3.681953646  |
| 63943 | 1.860013666  | 3.3848996 | 2.62245663   | -0.352108471 | -0.352108471 | -0.352108471 |

|       |              |           |              |              |              |              |
|-------|--------------|-----------|--------------|--------------|--------------|--------------|
| 63950 | -0.352108471 | -0.352108 | -0.352108471 | 1.167362396  | 2.686833264  | -0.352108471 |
| 63967 | 6.719923116  | 6.4923644 | 6.606143757  | 4.49290523   | 4.620365567  | 4.365444893  |
| 64062 | 8.370154701  | 6.183964  | 3.99777333   | -0.352108471 | -0.352108471 | -0.352108471 |
| 64077 | -0.352108471 | -0.352108 | -0.352108471 | 6.8287835    | 4.66005769   | 2.491331879  |
| 64080 | -0.352108471 | -0.352108 | -0.352108471 | 2.204376426  | -0.352108471 | 4.760861323  |
| 64083 | 6.779229539  | 6.0874079 | 6.433318728  | 4.557244691  | 4.980903231  | 4.13358615   |
| 64084 | 8.034490159  | 4.4796025 | 6.257046343  | -0.352108471 | -0.352108471 | -0.352108471 |
| 64089 | -0.352108471 | -0.352108 | -0.352108471 | 6.415584166  | 10.20914208  | 2.622026249  |
| 64097 | 0.254673727  | 5.2183858 | 2.736529761  | -0.352108471 | -0.352108471 | -0.352108471 |
| 64098 | 6.446033496  | 6.2911804 | 6.368606935  | 1.992178665  | 1.731739118  | 2.252618212  |
| 64106 | 8.163571973  | 6.6400194 | 5.116466812  | -0.352108471 | -0.352108471 | -0.352108471 |
| 64108 | -0.352108471 | -0.352108 | -0.352108471 | 3.490394555  | 6.32531018   | 9.160225805  |
| 64109 | -0.352108471 | -0.352108 | -0.352108471 | 2.672987808  | 7.182370621  | 4.927679215  |
| 64114 | 8.279007428  | 7.0871828 | 5.895358231  | 7.110592173  | 7.379014829  | 6.842169517  |
| 64115 | 5.354685649  | 5.3835036 | 5.325867653  | 7.484728707  | 7.516025064  | 7.453432349  |
| 64121 | -0.352108471 | -0.352108 | -0.352108471 | 2.748644951  | 3.489652612  | 3.119148782  |
| 64123 | 3.177906891  | 7.1265873 | 5.152247113  | -0.352108471 | -0.352108471 | -0.352108471 |
| 64131 | 5.749402114  | 5.7752316 | 5.723572646  | -0.352108471 | -0.352108471 | -0.352108471 |
| 64145 | 6.712704044  | 7.0903874 | 6.901545707  | 6.351797047  | 6.545570313  | 6.44868368   |
| 64149 | 9.061334584  | 8.1328188 | 7.204302972  | 5.978341452  | 9.593141867  | 7.78574166   |
| 64151 | -0.352108471 | -0.352108 | -0.352108471 | 7.871562408  | 3.649511737  | 5.760537073  |
| 64167 | 5.093120047  | 4.1125856 | 6.073654487  | 5.738663982  | 6.497336045  | 4.979991919  |
| 64175 | 4.45328559   | 4.9470072 | 5.440728789  | 3.090683483  | 2.169424975  | 1.248166466  |
| 64207 | 9.551450267  | 6.6114826 | 8.081466428  | 0.044132154  | 0.440372779  | -0.352108471 |
| 64208 | -0.352108471 | -0.352108 | -0.352108471 | 4.951503876  | 5.515630971  | 5.233567424  |
| 64210 | -0.352108471 | -0.352108 | -0.352108471 | 2.024343053  | 2.051108653  | 1.997577452  |
| 64215 | 6.317834233  | 5.6413476 | 6.994320828  | 6.756010887  | 6.407361112  | 6.058711337  |
| 64219 | -0.352108471 | -0.352108 | -0.352108471 | 5.88700099   | 5.262629658  | 6.511372322  |
| 64220 | 5.750073398  | 8.7882338 | 7.269153621  | -0.352108471 | -0.352108471 | -0.352108471 |
| 64222 | -0.352108471 | -0.352108 | -0.352108471 | 8.145718949  | 6.55174816   | 4.957777371  |
| 64223 | 5.681727979  | 5.5882244 | 5.775231583  | 5.219901144  | 5.124543452  | 5.315258837  |
| 64224 | 5.22867225   | 5.7398526 | 6.251032887  | 0.044132154  | -0.352108471 | 0.440372779  |
| 64225 | 5.018877004  | 6.7161533 | 8.413429695  | 3.409696216  | 8.014830639  | 5.712263427  |
| 64240 | -0.352108471 | -0.352108 | -0.352108471 | 7.558491418  | 6.415928975  | 5.273366531  |
| 64241 | 2.891547989  | -0.352108 | 6.135204448  | 0.440372779  | 0.440372779  | 0.440372779  |
| 64285 | -0.352108471 | -0.352108 | -0.352108471 | 1.964002179  | 0.808855576  | 3.119148782  |
| 64319 | 8.126098466  | 6.7054902 | 7.415794329  | 8.3861716    | 7.821164041  | 7.256156482  |
| 64320 | -0.352108471 | -0.352108 | -0.352108471 | 4.250799937  | 8.707720816  | 6.479260377  |
| 64324 | -0.352108471 | -0.352108 | -0.352108471 | 4.574260186  | 6.186562848  | 7.798865511  |
| 64326 | -0.352108471 | -0.352108 | -0.352108471 | 2.477574272  | 3.038779864  | 3.599985456  |
| 64332 | 5.114366655  | 6.3022478 | 5.708307224  | -0.352108471 | -0.352108471 | -0.352108471 |
| 64333 | 2.91562497   | 2.874763  | 2.833900981  | -0.352108471 | -0.352108471 | -0.352108471 |
| 64343 | 7.550691998  | 7.6019333 | 7.653174666  | -0.352108471 | -0.352108471 | -0.352108471 |
| 64344 | 6.84643295   | 5.4887327 | 6.167582836  | 0.86953393   | 0.808855576  | 0.930212283  |
| 64359 | 8.96094041   | 6.7922743 | 7.876607375  | 3.203502594  | 7.893737128  | 12.58397166  |
| 64374 | 2.752301789  | 3.503174  | 3.127737875  | 8.854669181  | 8.171122555  | 7.487575928  |
| 64376 | -0.352108471 | -0.352108 | -0.352108471 | 1.492819042  | 1.455244114  | 1.53039397   |

|       |              |           |              |              |              |              |
|-------|--------------|-----------|--------------|--------------|--------------|--------------|
| 64393 | 8.01968687   | 7.3896415 | 8.64973221   | 7.883534115  | 7.909550197  | 7.857518032  |
| 64395 | 3.527916452  | 3.136327  | 3.919505936  | 1.80041638   | 1.549724107  | 2.051108653  |
| 64397 | 8.202363764  | 6.7024312 | 5.202498572  | 6.373195497  | 4.413101083  | 8.333289911  |
| 64398 | -0.352108471 | -0.352108 | -0.352108471 | 1.146579317  | 4.418336914  | 2.782458115  |
| 64403 | 3.8441738    | 4.9470072 | 6.049840578  | -0.352108471 | -0.352108471 | -0.352108471 |
| 64409 | -0.352108471 | -0.352108 | -0.352108471 | 6.606648584  | 7.344598048  | 6.975623316  |
| 64412 | -0.352108471 | -0.352108 | -0.352108471 | 6.266367194  | 6.276856601  | 6.255877787  |
| 64418 | 7.680437959  | 6.8630334 | 6.045628857  | 5.689860511  | 6.30721667   | 5.99853859   |
| 64421 | 5.130802973  | 4.5462888 | 3.961774553  | 6.772537347  | 7.094871452  | 6.9337044    |
| 64422 | 6.37517147   | 6.6741289 | 6.973086287  | 6.424941448  | 6.167146283  | 6.296043865  |
| 64423 | -0.352108471 | -0.352108 | -0.352108471 | 6.545950789  | 6.614414028  | 6.477487549  |
| 64425 | -0.352108471 | -0.352108 | -0.352108471 | 4.121846117  | 3.772970267  | 4.470721967  |
| 64427 | 6.607377459  | 3.8233977 | 9.391357177  | -0.352108471 | -0.352108471 | -0.352108471 |
| 64429 | 4.055460084  | 5.9788128 | 5.017136436  | 8.691769498  | 7.304663518  | 5.917557537  |
| 64430 | -0.352108471 | -0.352108 | -0.352108471 | 6.556689902  | 6.588465267  | 6.524914536  |
| 64432 | -0.430338958 | 2.2456    | 4.921538984  | -0.352108471 | -0.352108471 | -0.352108471 |
| 64434 | 6.083202488  | 8.4963522 | 7.289777346  | 6.830258893  | 6.401088366  | 7.25942942   |
| 64579 | -0.352108471 | -0.352108 | -0.352108471 | 6.153217526  | 5.494417177  | 4.835616827  |
| 64581 | 4.869400283  | 7.6840754 | 6.276737847  | 1.657360368  | 1.876861374  | 1.437859363  |
| 64595 | 4.5088668    | 5.8497669 | 3.167966703  | 6.442904904  | 6.146874307  | 5.85084371   |
| 64598 | -0.352108471 | -0.352108 | -0.352108471 | 4.693340309  | 5.596916991  | 6.500493674  |
| 64599 | 6.723786325  | 4.7138212 | 5.718803747  | 0.044132154  | 0.440372779  | -0.352108471 |
| 64600 | 5.284974356  | 4.6977248 | 5.872223893  | -0.352108471 | -0.352108471 | -0.352108471 |
| 64645 | 6.346998353  | 5.1245435 | 3.90208855   | 6.790575708  | 5.907806919  | 6.349191313  |
| 64648 | -0.352108471 | -0.352108 | -0.352108471 | 4.178899946  | 4.245214285  | 4.112585606  |
| 64651 | 1.392109249  | 3.136327  | -0.352108471 | 3.790723471  | 6.676411376  | 5.233567424  |
| 64682 | -0.352108471 | -0.352108 | -0.352108471 | 3.642300096  | 4.245563566  | 4.848827036  |
| 64689 | -0.352108471 | -0.352108 | -0.352108471 | 7.478462511  | 7.49196897   | 7.464956052  |
| 64708 | 6.414258136  | 4.4743412 | 8.354175031  | 5.768037081  | 5.057085094  | 5.412561087  |
| 64710 | 5.278710445  | 3.3524406 | 4.315575532  | 7.89873015   | 7.127759146  | 6.356788142  |
| 64718 | 5.77329188   | 5.5882244 | 5.958359385  | 1.842407068  | 1.876861374  | 1.807952763  |
| 64743 | 7.159460696  | 7.1121207 | 7.064780794  | -0.352108471 | -0.352108471 | -0.352108471 |
| 64744 | 3.814304253  | 5.4584815 | 7.102658732  | -0.352108471 | -0.352108471 | -0.352108471 |
| 64746 | -0.352108471 | -0.352108 | -0.352108471 | 7.273593076  | 5.325716078  | 3.37783908   |
| 64748 | 7.774792467  | 7.0167764 | 6.258760367  | 0.440372779  | 0.440372779  | 0.440372779  |
| 64750 | 2.761190761  | 10.347051 | 6.554121048  | 5.666775296  | 4.98465686   | 5.325716078  |
| 64755 | -0.352108471 | -0.352108 | -0.352108471 | 6.88036327   | 6.463674915  | 6.04698656   |
| 64756 | 5.566834031  | 7.0400885 | 6.303461245  | 5.88700099   | 7.24829239   | 4.52570959   |
| 64757 | -0.352108471 | -0.352108 | -0.352108471 | 0.919601171  | -0.352108471 | 2.191310813  |
| 64759 | -0.352108471 | -0.352108 | -0.352108471 | 7.411911832  | 6.220238598  | 5.028565365  |
| 64760 | -0.352108471 | -0.352108 | -0.352108471 | 5.723485516  | 5.731413688  | 5.715557343  |
| 64763 | -0.352108471 | -0.352108 | -0.352108471 | 7.102622694  | 5.824727136  | 6.463674915  |
| 64766 | 7.146480757  | 6.0304897 | 8.262471772  | 1.90117116   | 1.549724107  | 2.252618212  |
| 64769 | 6.250777728  | 5.689482  | 5.128186251  | 0.536727595  | 2.958541694  | 5.380355793  |
| 64773 | -0.352108471 | -0.352108 | -0.352108471 | 6.873298864  | 5.123514031  | 5.998406448  |
| 64777 | -0.352108471 | -0.352108 | -0.352108471 | 8.672755728  | -0.314955837 | 4.178899946  |
| 64778 | 5.939192221  | 6.0730906 | 5.805293798  | -0.352108471 | -0.352108471 | -0.352108471 |

|       |              |           |              |              |              |              |
|-------|--------------|-----------|--------------|--------------|--------------|--------------|
| 64779 | -0.352108471 | -0.352108 | -0.352108471 | 4.822946739  | 5.767916455  | 5.295431597  |
| 64781 | 6.972090567  | 7.0231519 | 6.92102926   | 7.094095983  | 7.064440118  | 7.034784252  |
| 64782 | -0.352108471 | -0.352108 | -0.352108471 | 6.406486527  | 6.410585269  | 6.402387785  |
| 64783 | -0.352108471 | -0.352108 | -0.352108471 | 1.783698732  | 3.711361887  | -0.143964422 |
| 64784 | 2.465395097  | 5.2174911 | 7.969587181  | -0.352108471 | -0.352108471 | -0.352108471 |
| 64786 | 5.537882078  | 8.5567546 | 7.047318347  | 7.683080299  | 6.713119361  | 5.743158423  |
| 64792 | 4.590848545  | 7.4137688 | 6.002308672  | 3.788235057  | 3.169499624  | 2.55076419   |
| 64793 | 5.005505193  | 7.0043403 | 9.003175473  | -0.352108471 | -0.352108471 | -0.352108471 |
| 64798 | 2.794084087  | 2.3510862 | 1.908088394  | -0.352108471 | -0.352108471 | -0.352108471 |
| 64799 | -0.352108471 | -0.352108 | -0.352108471 | 2.947260382  | 4.887790674  | 1.00673009   |
| 64801 | -0.352108471 | -0.352108 | -0.352108471 | 5.613451577  | 6.19403316   | 5.032869994  |
| 64802 | 6.857594311  | 8.2623707 | 9.667147028  | 7.11375507   | 6.61633976   | 7.611170381  |
| 64834 | 4.641167391  | 9.6742478 | 7.15770761   | 8.442141746  | 6.836213819  | 5.230285892  |
| 64837 | -0.352108471 | -0.352108 | -0.352108471 | 4.057995846  | 0.736988586  | 2.397492216  |
| 64840 | 5.950174623  | 7.7989976 | 6.874586128  | -0.352108471 | -0.352108471 | -0.352108471 |
| 64841 | 5.003627844  | 5.5089082 | 5.256268008  | 3.010220895  | 2.100935855  | 3.919505936  |
| 64848 | -0.352108471 | -0.352108 | -0.352108471 | 6.949901658  | 6.878181404  | 7.021621912  |
| 64852 | 2.928049433  | 9.1127127 | 6.020381091  | -0.352108471 | -0.352108471 | -0.352108471 |
| 64853 | 7.726306258  | 7.839781  | 7.953255701  | 7.003799972  | 5.034974955  | 8.97262499   |
| 64854 | 4.729831277  | 7.0707535 | 5.90029238   | 1.345967809  | 1.14221151   | 1.549724107  |
| 64855 | 10.04867405  | 8.137867  | 6.227060046  | 10.16997508  | 8.418446513  | 6.666917941  |
| 64856 | -0.352108471 | -0.352108 | -0.352108471 | 6.692644478  | 6.32531018   | 5.957975882  |
| 64857 | 8.804505221  | 6.9900309 | 7.897268052  | 5.367886754  | 4.566323711  | 4.967105233  |
| 64860 | -0.352108471 | -0.352108 | -0.352108471 | 6.469652106  | 1.888147785  | 4.178899946  |
| 64864 | 6.674128879  | 6.1746037 | 7.173654103  | 4.80208491   | 5.012286671  | 4.591883149  |
| 64866 | 6.503697469  | 5.7545534 | 5.00540933   | 0.289051906  | -0.352108471 | 0.930212283  |
| 64881 | 5.961166865  | 6.1082995 | 5.814034224  | -0.352108471 | -0.352108471 | -0.352108471 |
| 64897 | 7.339129632  | 4.1000004 | 5.719564994  | -0.352108471 | -0.352108471 | -0.352108471 |
| 64900 | 5.417023759  | 6.9950766 | 3.838970952  | 0.484598105  | 2.795182383  | 5.105766662  |
| 64919 | 7.539035592  | 7.2078382 | 6.876640731  | 5.20089139   | 5.254689875  | 5.147092904  |
| 64922 | 7.033116437  | 5.6886226 | 4.344128857  | 2.588069749  | 3.20829756   | 2.898183655  |
| 64925 | 6.537383725  | 6.7158643 | 6.358903141  | 0.044132154  | 0.440372779  | -0.352108471 |
| 64926 | 4.778807391  | 7.1818607 | 5.980334028  | -0.352108471 | -0.352108471 | -0.352108471 |
| 64927 | 8.668305562  | 6.8119539 | 4.955602246  | 6.860193211  | 6.211642887  | 7.508743534  |
| 64928 | 7.561151448  | 6.7871341 | 6.013116698  | 7.495082972  | 5.958359385  | 4.421635797  |
| 64940 | 6.433318728  | 6.4453648 | 6.421272681  | -0.352108471 | -0.352108471 | -0.352108471 |
| 64943 | -0.352108471 | -0.352108 | -0.352108471 | 4.915509878  | 5.493783215  | 6.072056552  |
| 64946 | 2.139844176  | 0.2514863 | 4.028202024  | 9.094706106  | 7.335962107  | 5.577218107  |
| 64951 | 4.755240115  | 5.2146317 | 4.295848569  | -0.352108471 | -0.352108471 | -0.352108471 |
| 64960 | 6.239980599  | 5.8721274 | 6.056053999  | 1.036211897  | 1.14221151   | 0.930212283  |
| 64963 | 6.787134073  | 7.3538527 | 6.220415432  | -0.352108471 | -0.352108471 | -0.352108471 |
| 64969 | -0.352108471 | -0.352108 | -0.352108471 | 7.970563352  | 4.927679215  | 1.884795078  |
| 64975 | -0.352108471 | -0.352108 | -0.352108471 | 6.796814879  | 7.489832597  | 6.103797162  |
| 64976 | -0.352108471 | -0.352108 | -0.352108471 | 7.798509736  | 4.429012023  | 6.113760879  |
| 64978 | -0.352108471 | -0.352108 | -0.352108471 | 5.785505277  | 5.825167992  | 5.745842563  |
| 64981 | -0.352108471 | -0.352108 | -0.352108471 | 6.47267644   | 6.829513733  | 6.115839148  |
| 64983 | -0.352108471 | -0.352108 | -0.352108471 | 5.704335255  | 5.715557343  | 5.693113166  |

|       |              |           |              |              |              |              |
|-------|--------------|-----------|--------------|--------------|--------------|--------------|
| 65003 | -0.352108471 | -0.352108 | -0.352108471 | 6.656376543  | 6.165870606  | 5.675364669  |
| 65008 | -0.352108471 | -0.352108 | -0.352108471 | 6.886610445  | 6.900175883  | 6.873045007  |
| 65009 | -0.352108471 | -0.352108 | -0.352108471 | 5.821410838  | 7.007140474  | 4.635681202  |
| 65010 | 3.622310641  | 2.0992354 | 2.860773008  | 0.044132154  | -0.352108471 | 0.440372779  |
| 65059 | 2.553073296  | -0.352108 | 5.458255064  | 6.40196491   | 6.215464554  | 6.588465267  |
| 65062 | -0.352108471 | -0.352108 | -0.352108471 | 5.107416872  | 6.666585107  | 5.88700099   |
| 65065 | 5.961166865  | 9.0280216 | 2.894312103  | -0.352108471 | -0.352108471 | -0.352108471 |
| 65078 | 3.964368457  | 5.7494021 | 7.534435771  | -0.352108471 | -0.352108471 | -0.352108471 |
| 65080 | 4.616151079  | 7.0978125 | 9.579473981  | 0.808855576  | 0.808855576  | 0.808855576  |
| 65082 | 6.488053522  | 5.4309597 | 5.959506607  | 5.51540809   | 7.938549709  | 3.092266471  |
| 65083 | -0.352108471 | -0.352108 | -0.352108471 | 4.920065843  | 7.040602213  | 5.980334028  |
| 65084 | 5.90029238   | 7.8436656 | 3.956919138  | 6.165870606  | 4.860612601  | 7.471128611  |
| 65095 | -0.352108471 | -0.352108 | -0.352108471 | 3.585121301  | 3.615460478  | 3.554782125  |
| 65108 | 7.997293817  | 5.3509639 | 6.674128879  | 3.050245359  | 3.188052205  | 3.119148782  |
| 65110 | 7.398848825  | 6.8860958 | 6.373342693  | 4.964006879  | 7.367734333  | 6.165870606  |
| 65117 | -0.352108471 | -0.352108 | -0.352108471 | 8.220781697  | 7.063286202  | 5.905790708  |
| 65123 | -0.352108471 | -0.352108 | -0.352108471 | 3.02968186   | 2.076022254  | 1.122362649  |
| 65124 | 6.415584166  | 6.2748379 | 6.556330467  | 8.788876079  | 4.174171811  | 6.481523945  |
| 65125 | -0.352108471 | -0.352108 | -0.352108471 | 2.252618212  | 2.252618212  | 2.252618212  |
| 65244 | 8.22223116   | 7.5277813 | 6.833331358  | 7.121742116  | 8.581877728  | 5.661606504  |
| 65250 | 6.861057494  | 6.8767254 | 6.845389604  | 5.723485516  | 5.731413688  | 5.715557343  |
| 65258 | 2.553073296  | 3.555049  | 1.55109759   | -0.352108471 | -0.352108471 | -0.352108471 |
| 65260 | 6.909009051  | 9.1173919 | 4.700626177  | 9.091042088  | 5.049796103  | 7.070419096  |
| 65263 | 5.62065828   | 4.3393256 | 4.979991919  | 0.639342438  | 2.052593179  | 1.345967809  |
| 65265 | 7.825383622  | 7.783254  | 7.867513291  | 6.361035528  | 6.841511354  | 5.880559702  |
| 65266 | 5.852937462  | 6.9601805 | 4.745694415  | -0.352108471 | -0.352108471 | -0.352108471 |
| 65267 | -0.352108471 | -0.352108 | -0.352108471 | 6.56348723   | 3.838990613  | 5.201238922  |
| 65268 | -0.352108471 | -0.352108 | -0.352108471 | -0.503747661 | 5.205920142  | 2.351086241  |
| 65979 | 8.470122167  | 9.7546676 | 7.185576688  | 6.627732289  | 8.625050135  | 10.62236798  |
| 65981 | -0.352108471 | -0.352108 | -0.352108471 | 6.47523743   | 5.264093599  | 5.869665514  |
| 65983 | 0.320585424  | 1.5010176 | 2.681449745  | 2.076022254  | 0.739174258  | 3.41287025   |
| 65985 | -0.352108471 | -0.352108 | -0.352108471 | 5.396341388  | 7.397395377  | 6.396868383  |
| 65988 | 5.977600527  | 6.1515856 | 6.32557073   | 4.973314835  | 5.509951389  | 5.241633112  |
| 65990 | -0.352108471 | -0.352108 | -0.352108471 | 2.951536416  | 1.366941702  | 4.536131131  |
| 65992 | -0.352108471 | -0.352108 | -0.352108471 | 6.095536005  | 5.623698733  | 5.859617369  |
| 65993 | -0.352108471 | -0.352108 | -0.352108471 | 6.952349711  | 7.294621465  | 7.123485588  |
| 65996 | 5.566433708  | 8.137505  | 6.85196936   | 6.837896976  | 8.204674434  | 7.521285705  |
| 65998 | -0.352108471 | -0.352108 | -0.352108471 | 5.800199788  | 7.486765233  | 4.113634342  |
| 66005 | -0.352108471 | -0.352108 | -0.352108471 | 6.713776402  | 6.729085562  | 6.698467242  |
| 66008 | 5.054754712  | 4.8658504 | 5.243659007  | -0.352108471 | -0.352108471 | -0.352108471 |
| 66036 | 7.638475353  | 7.4782435 | 7.798707247  | 6.292710438  | 6.116150736  | 5.939591035  |
| 78988 | 5.883690331  | 5.9530917 | 6.022493092  | 7.390676288  | 8.519854519  | 6.261498057  |
| 78992 | -0.352108471 | -0.352108 | -0.352108471 | 6.614003991  | 7.054600764  | 7.495197537  |
| 78994 | 7.652552373  | 5.8565647 | 6.754558526  | -0.352108471 | -0.352108471 | -0.352108471 |
| 78998 | 5.656289537  | 5.7155573 | 5.597021732  | 1.218975116  | 0.440372779  | 1.997577452  |
| 78999 | 4.947007189  | 6.4806504 | 3.413363971  | 7.206823982  | 6.949901658  | 6.692979334  |
| 79000 | 3.41407487   | 3.136327  | 3.69182277   | 6.31523113   | 6.31523113   | 6.31523113   |

|       |              |           |              |              |              |              |
|-------|--------------|-----------|--------------|--------------|--------------|--------------|
| 79001 | 6.946351317  | 7.1577076 | 7.369063902  | 7.887147635  | 9.036381991  | 6.737913278  |
| 79002 | 8.399665392  | 8.4498164 | 8.349514391  | 7.191902102  | 7.21486974   | 7.168934463  |
| 79004 | -0.352108471 | -0.352108 | -0.352108471 | 5.663737322  | 5.665786693  | 5.661687951  |
| 79005 | 6.256109845  | 6.4105853 | 6.101634422  | 6.014753478  | 5.804293869  | 6.225213087  |
| 79006 | 7.012887374  | 6.4636749 | 5.914462456  | 5.895237137  | 6.77374078   | 7.652244423  |
| 79009 | -0.352108471 | -0.352108 | -0.352108471 | 8.797896667  | 5.760537073  | 2.723177479  |
| 79016 | 7.365949534  | 6.6350594 | 8.096839644  | 9.193027696  | 7.080117661  | 4.967207626  |
| 79022 | 4.640845938  | 6.3178342 | 7.994822528  | -0.352108471 | -0.352108471 | -0.352108471 |
| 79026 | 9.143898825  | 7.019034  | 8.081466428  | 8.215261918  | 8.923130714  | 7.507393122  |
| 79029 | 2.553073296  | 0.6439336 | 4.462212988  | -0.352108471 | -0.352108471 | -0.352108471 |
| 79031 | -0.352108471 | -0.352108 | -0.352108471 | 2.784130118  | 4.857539934  | 6.930949751  |
| 79035 | 4.731111372  | 2.7226036 | 6.739619152  | 6.609358453  | 6.868836921  | 7.128315389  |
| 79036 | 4.863226045  | 2.40894   | 7.3175121    | 7.123485588  | 6.344483658  | 7.902487518  |
| 79038 | -0.352108471 | -0.352108 | -0.352108471 | 5.958359385  | 5.958359385  | 5.958359385  |
| 79041 | 4.962148436  | 6.0932891 | 7.22442972   | 7.166552573  | 5.523336263  | 3.880119952  |
| 79042 | 8.108157606  | 5.072859  | 6.590508304  | 6.981888777  | 6.288881886  | 7.674895668  |
| 79047 | -0.352108471 | -0.352108 | -0.352108471 | 7.319522177  | 6.359270363  | 5.399018549  |
| 79050 | -0.352108471 | -0.352108 | -0.352108471 | 7.50587715   | 7.528756621  | 7.482997679  |
| 79054 | 3.654774043  | 6.2372177 | 8.819661403  | 5.458255064  | 7.150025221  | 3.766484907  |
| 79056 | 5.163777147  | 5.7282969 | 6.292816736  | 1.184035823  | 1.437859363  | 0.930212283  |
| 79058 | -0.352108471 | -0.352108 | -0.352108471 | 2.686833264  | 3.288537255  | 2.085129272  |
| 79064 | 6.816905042  | 5.337374  | 8.296436083  | 5.821410838  | 6.485414236  | 5.15740744   |
| 79065 | 6.758702766  | 6.8449248 | 6.801813774  | 0.044132154  | 0.440372779  | -0.352108471 |
| 79066 | 5.645392     | 4.9088628 | 6.381921183  | 2.92016921   | 2.686833264  | 3.153505157  |
| 79068 | 9.452464317  | 5.7078873 | 7.580175832  | 6.448016836  | 5.479280235  | 7.416753437  |
| 79071 | 7.042523083  | 7.0441776 | 7.040868605  | 0.395051519  | 1.14221151   | -0.352108471 |
| 79073 | 7.567545379  | 6.9375473 | 8.197543502  | 6.630819448  | 6.560204177  | 6.489588906  |
| 79075 | -0.352108471 | -0.352108 | -0.352108471 | 5.630463094  | 4.927679215  | 4.224895336  |
| 79077 | 6.519673958  | 6.5498529 | 6.489495002  | 7.063286202  | 7.082394844  | 7.044177561  |
| 79078 | -0.352108471 | -0.352108 | -0.352108471 | 5.944722576  | 5.97880156   | 5.961762068  |
| 79080 | 4.924617113  | 4.3065499 | 4.615583513  | 7.186511196  | 7.129941003  | 7.243081389  |
| 79083 | 8.067058037  | 7.3471469 | 7.707102448  | 3.895746505  | 5.775068216  | 7.654389926  |
| 79084 | -0.352108471 | -0.352108 | -0.352108471 | 6.434644758  | 6.448016836  | 6.421272681  |
| 79086 | 4.578605156  | 2.4139212 | 0.249237147  | 3.010220895  | 1.494171942  | 4.526269849  |
| 79088 | 4.731342239  | 5.0591577 | 4.403526732  | 1.556591723  | 1.66308105   | 1.450102397  |
| 79089 | 6.134800615  | 6.1679668 | 6.101634422  | 6.56915909   | 6.588465267  | 6.549852913  |
| 79094 | 3.54921092   | 5.0819401 | 4.315575532  | 2.124237496  | 2.147539136  | 2.100935855  |
| 79095 | -0.352108471 | -0.352108 | -0.352108471 | 6.532441983  | 5.84169629   | 7.223187677  |
| 79101 | -0.352108471 | -0.352108 | -0.352108471 | 6.070043966  | 6.101634422  | 6.038453511  |
| 79102 | -0.352108471 | -0.352108 | -0.352108471 | 7.517670946  | 7.483479721  | 7.551862171  |
| 79109 | 4.160573095  | 6.2744092 | 5.217491139  | 5.712263427  | 3.082204507  | 8.342322347  |
| 79142 | 7.875021286  | 9.1869421 | 6.563100437  | -0.352108471 | -0.352108471 | -0.352108471 |
| 79143 | 1.383520155  | -0.352108 | 3.119148782  | 6.912551088  | 8.514346153  | 10.11614122  |
| 79144 | 7.673298345  | 6.9779046 | 8.368692133  | 9.27518472   | 8.202186715  | 7.12918871   |
| 79153 | 5.54638729   | 7.7006946 | 6.623540933  | -0.352108471 | -0.352108471 | -0.352108471 |
| 79155 | 6.199595632  | 6.2312245 | 6.167966808  | -0.352108471 | -0.352108471 | -0.352108471 |
| 79157 | 4.805894371  | 4.9799919 | 4.631796822  | 2.096182139  | 1.939746065  | 2.252618212  |



|       |              |           |              |              |              |              |
|-------|--------------|-----------|--------------|--------------|--------------|--------------|
| 79158 | 6.494850053  | 7.2488467 | 8.0028434    | 7.69235088   | 7.305415326  | 6.918479773  |
| 79159 | 8.90093852   | 3.2468215 | 6.073880033  | 8.139974393  | 6.382981583  | 7.261477988  |
| 79171 | 6.183964016  | 8.4512467 | 3.91668132   | 6.296043865  | 6.636146932  | 5.955940799  |
| 79174 | -0.352108471 | -0.352108 | -0.352108471 | 4.977710418  | 5.726671899  | 4.228748937  |
| 79175 | 5.980334028  | 4.1482081 | 7.812459965  | -0.352108471 | -0.352108471 | -0.352108471 |
| 79176 | 4.304520476  | 5.0894122 | 5.874303927  | 4.456886199  | 4.055673818  | 4.858098581  |
| 79180 | 5.896777473  | 6.6400194 | 7.383261312  | 8.03804272   | 6.769641641  | 5.501240562  |
| 79183 | 6.512147343  | 5.8724934 | 6.192320362  | 6.067050902  | 6.790856466  | 7.514662029  |
| 79188 | 6.020381091  | 5.6303835 | 6.41037867   | 7.877482668  | 5.848389372  | 6.86293602   |
| 79192 | 7.723635071  | 5.280891  | 6.502263028  | -0.352108471 | -0.352108471 | -0.352108471 |
| 79228 | -0.352108471 | -0.352108 | -0.352108471 | 5.859261334  | 5.199361398  | 5.529311366  |
| 79230 | 7.40101804   | 3.8324686 | 5.616743323  | 2.498005078  | 1.876861374  | 3.119148782  |
| 79269 | 8.445297939  | 6.3931751 | 10.49742082  | 7.337230787  | 4.955462599  | 9.718998975  |
| 79365 | -0.352108471 | -0.352108 | -0.352108471 | 6.296043865  | 4.27316396   | 8.318923771  |
| 79411 | 5.085607333  | 4.9799919 | 5.191222747  | 1.58479924   | 1.731739118  | 1.437859363  |
| 79442 | 6.547187707  | 4.3186563 | 5.432922028  | 5.852863847  | 7.153718042  | 4.552009652  |
| 79443 | 5.688622647  | 5.7155573 | 5.661687951  | 6.51496239   | 6.532588736  | 6.497336045  |
| 79447 | -0.352108471 | -0.352108 | -0.352108471 | 5.760537073  | 5.775231583  | 5.745842563  |
| 79469 | -0.352108471 | -0.352108 | -0.352108471 | 5.620762093  | 5.653299811  | 5.588224375  |
| 79567 | 9.096103812  | 6.0335312 | 7.564817513  | 5.953793665  | 7.495536378  | 6.724665022  |
| 79571 | 6.834956138  | 6.519674  | 6.204391777  | -0.352108471 | -0.352108471 | -0.352108471 |
| 79572 | 5.971599196  | 5.8922408 | 6.050957599  | -0.352108471 | -0.352108471 | -0.352108471 |
| 79573 | 1.383520155  | -0.352108 | 3.119148782  | 5.284974356  | 5.315258837  | 5.254689875  |
| 79575 | -0.352108471 | -0.352108 | -0.352108471 | 3.349712172  | 8.22981328   | 5.789762726  |
| 79581 | 6.242048279  | 5.0935678 | 7.390528797  | 8.888628446  | 5.575983727  | 2.263339007  |
| 79583 | 5.806407293  | 5.9583594 | 6.110311476  | -0.352108471 | -0.352108471 | -0.352108471 |
| 79585 | 5.392061359  | 5.5539547 | 5.230167971  | -0.352108471 | -0.352108471 | -0.352108471 |
| 79586 | 7.009263213  | 5.2174911 | 3.425719065  | 2.494267741  | 8.95270329   | 5.723485516  |
| 79587 | -0.352108471 | -0.352108 | -0.352108471 | 6.056053999  | 7.790180286  | 4.321927712  |
| 79594 | 5.852937462  | 7.2197114 | 4.486163553  | 8.871018692  | 4.494626193  | 6.682822443  |
| 79595 | 6.110429784  | 5.690155  | 5.90029238   | -0.352108471 | -0.352108471 | -0.352108471 |
| 79598 | 6.808890702  | 6.5237729 | 7.094008547  | 6.548106829  | 4.510515903  | 5.529311366  |
| 79600 | 5.227550975  | 5.6065246 | 5.985498285  | 1.631676003  | 3.615460478  | -0.352108471 |
| 79602 | -0.352108471 | -0.352108 | -0.352108471 | 6.463674915  | 6.479332994  | 6.448016836  |
| 79603 | -0.352108471 | -0.352108 | -0.352108471 | 5.637296679  | 5.653299811  | 5.621293547  |
| 79608 | 8.989814916  | 6.4333187 | 3.876822539  | 3.522070642  | 6.430149827  | 0.613991457  |
| 79611 | 6.75496194   | 8.9222679 | 4.587655941  | -0.352108471 | -0.352108471 | -0.352108471 |
| 79612 | 4.201099247  | 3.9195059 | 4.482692559  | 0.897715333  | -0.352108471 | 2.147539136  |
| 79616 | -0.352108471 | -0.352108 | -0.352108471 | 5.095423988  | 6.000882793  | 4.189965183  |
| 79622 | 1.501017585  | -0.352108 | 3.354143641  | 4.027914765  | 6.266367194  | 8.504819622  |
| 79627 | 5.90029238   | 6.6652206 | 5.135364208  | 0.228373553  | 0.808855576  | -0.352108471 |
| 79628 | -0.352108471 | -0.352108 | -0.352108471 | 6.270222109  | 5.662217806  | 6.878226411  |
| 79631 | -0.352108471 | -0.352108 | -0.352108471 | 5.637296679  | 5.653299811  | 5.621293547  |
| 79633 | 4.756742582  | 7.4248741 | 6.090808341  | -0.352108471 | -0.352108471 | -0.352108471 |
| 79639 | 7.21054788   | 4.5164064 | 5.863477149  | 5.374787781  | 3.799408031  | 4.587097906  |
| 79641 | -0.352108471 | -0.352108 | -0.352108471 | 6.28531312   | 3.459015953  | 9.111610286  |
| 79642 | -0.352108471 | -0.352108 | -0.352108471 | 5.88700099   | 6.704755643  | 5.069246337  |

|       |              |           |              |              |              |              |
|-------|--------------|-----------|--------------|--------------|--------------|--------------|
| 79644 | 6.370529939  | 5.3247267 | 5.847628321  | 3.50198806   | 1.678838435  | -0.144311189 |
| 79647 | 3.289189542  | 8.0830638 | 5.686126657  | 6.45948883   | 7.425203426  | 8.390918022  |
| 79648 | 6.523931874  | 5.0522677 | 3.580603497  | 2.2153075    | 2.435312858  | 2.32531018   |
| 79649 | 4.167062861  | 2.6610869 | 3.41407487   | 5.855161109  | 9.538355061  | 2.171967156  |
| 79650 | 7.407823587  | 8.0681001 | 7.737961847  | 6.949901658  | 5.529073837  | 8.37072948   |
| 79651 | 1.501017585  | -0.352108 | 3.354143641  | 2.039485684  | -0.352108471 | 4.43107984   |
| 79652 | 6.77374078   | 6.7884205 | 6.759061079  | -0.352108471 | -0.352108471 | -0.352108471 |
| 79654 | -0.352108471 | -0.352108 | -0.352108471 | 7.152037191  | 7.168934463  | 7.135139919  |
| 79657 | -0.352108471 | -0.352108 | -0.352108471 | 8.883919843  | 6.74407332   | 4.604226797  |
| 79658 | -0.352108471 | -0.352108 | -0.352108471 | 5.7728658    | 4.80208491   | 3.831304021  |
| 79660 | 9.148118084  | 8.16864   | 7.189161965  | 3.855732012  | 9.259908425  | 6.557820219  |
| 79665 | -0.352108471 | -0.352108 | -0.352108471 | 2.678682649  | 5.617887196  | -0.260521897 |
| 79667 | 4.846956763  | 4.2931614 | 4.570059097  | -0.352108471 | -0.352108471 | -0.352108471 |
| 79671 | 5.90029238   | 5.5501947 | 6.250390023  | -0.352108471 | -0.352108471 | -0.352108471 |
| 79672 | -0.352108471 | -0.352108 | -0.352108471 | 5.064224012  | 6.165870606  | 7.2675172    |
| 79676 | -0.352108471 | -0.352108 | -0.352108471 | 6.766453815  | 6.773846551  | 6.759061079  |
| 79680 | 6.486805217  | 6.7775615 | 6.196048945  | 4.103893054  | 5.054280952  | 3.153505157  |
| 79684 | 5.625160771  | 5.6532998 | 5.597021732  | -0.352108471 | -0.352108471 | -0.352108471 |
| 79689 | 2.351086241  | 1.0924157 | 3.609756788  | 1.043426334  | 0.440372779  | 1.646479888  |
| 79690 | 7.648357335  | 6.7408596 | 7.194608474  | 3.261261387  | 4.826956994  | 6.392652602  |
| 79691 | 8.252876448  | 6.6473961 | 7.45013629   | 3.894950463  | 7.394657313  | 5.644803888  |
| 79697 | -0.352108471 | -0.352108 | -0.352108471 | 3.736322538  | 6.454525438  | 5.095423988  |
| 79699 | 7.874365488  | 6.7348555 | 7.30461047   | 6.627658487  | 7.684816315  | 7.156237401  |
| 79705 | -0.352108471 | -0.352108 | -0.352108471 | 5.704335255  | 3.59914697   | 7.809523539  |
| 79707 | 9.231618302  | 8.5176617 | 9.945574885  | 7.591099561  | 9.180400365  | 8.385749963  |
| 79709 | 7.998904298  | 8.0797577 | 7.918050919  | 8.112109697  | 7.408368635  | 6.704627574  |
| 79710 | 1.383520155  | -0.352108 | 3.119148782  | 5.325716078  | 5.336173319  | 5.315258837  |
| 79711 | 7.449622211  | 7.474041  | 7.425203426  | 7.178522138  | 7.188109812  | 7.168934463  |
| 79712 | -0.352108471 | -0.352108 | -0.352108471 | 3.245625856  | 5.034370055  | 1.456881657  |
| 79714 | 2.351086241  | 2.3714773 | 2.330695134  | -0.352108471 | -0.352108471 | -0.352108471 |
| 79717 | 3.474380252  | 4.3155755 | 5.156770811  | 7.713631986  | 4.9183863    | 6.316009143  |
| 79718 | 3.66960684   | 8.3711553 | 6.020381091  | 6.20188331   | 6.882573705  | 7.5632641    |
| 79723 | 6.615503319  | 4.4029421 | 5.509222715  | 1.223721097  | 1.305230684  | 1.14221151   |
| 79724 | -0.352108471 | -0.352108 | -0.352108471 | 5.824288785  | 6.175746248  | 5.472831321  |
| 79727 | 6.595129197  | 5.975292  | 5.355454849  | 3.606446812  | 3.751349834  | 3.896252856  |
| 79728 | 6.182833209  | 5.4489798 | 4.715126332  | -0.352108471 | -0.352108471 | -0.352108471 |
| 79741 | 6.82126504   | 5.9391922 | 5.057119403  | -0.352108471 | -0.352108471 | -0.352108471 |
| 79742 | 6.525105542  | 7.7254983 | 5.324712747  | 3.874845854  | 6.545755645  | 9.216665437  |
| 79747 | 1.363577016  | 9.9514107 | 5.657493881  | -0.352108471 | -0.352108471 | -0.352108471 |
| 79751 | 7.867153417  | 6.056054  | 4.244954581  | 8.242599605  | 5.823360095  | 10.66183912  |
| 79753 | 6.159099383  | 6.3831707 | 6.607242115  | 7.196070268  | 6.825760021  | 7.010915144  |
| 79755 | -0.352108471 | -0.352108 | -0.352108471 | 6.271905109  | 7.095432661  | 7.918960214  |
| 79759 | 5.457139548  | 7.5059083 | 6.481523945  | -0.352108471 | -0.352108471 | -0.352108471 |
| 79760 | -0.352108471 | -0.352108 | -0.352108471 | 5.708801509  | 5.263851904  | 4.8189023    |
| 79763 | 5.550549618  | 4.5599556 | 6.541143656  | 9.700267411  | 4.558360156  | 7.129313784  |
| 79770 | 8.118478735  | 6.1852842 | 7.15188147   | 6.22018789   | 7.304856817  | 8.389525744  |
| 79776 | -0.352108471 | -0.352108 | -0.352108471 | 8.511051832  | 3.367332611  | 5.939192221  |

|       |              |           |              |              |              |              |
|-------|--------------|-----------|--------------|--------------|--------------|--------------|
| 79778 | 5.284974356  | 4.9587197 | 5.61122902   | 6.133512735  | 6.926938623  | 7.72036451   |
| 79782 | 4.691943082  | 5.2149592 | 4.953451118  | -0.352108471 | -0.352108471 | -0.352108471 |
| 79784 | 6.688932906  | 4.801856  | 5.745394463  | -0.352108471 | -0.352108471 | -0.352108471 |
| 79786 | 6.427990035  | 5.1841515 | 3.940312948  | 1.117721484  | 1.305230684  | 0.930212283  |
| 79792 | 9.175122757  | 5.980334  | 2.7855453    | -0.352108471 | -0.352108471 | -0.352108471 |
| 79794 | 5.865107274  | 5.0242786 | 5.444692932  | 5.54524521   | 3.887455064  | 7.203035356  |
| 79796 | 6.497951189  | 7.0413321 | 6.769641641  | 3.622017489  | 4.832674249  | 6.043331009  |
| 79798 | -0.352108471 | -0.352108 | -0.352108471 | 5.369332089  | 5.383503645  | 5.355160532  |
| 79800 | 6.030685393  | 7.1256856 | 6.578185475  | 4.097820191  | 6.157357479  | 8.216894767  |
| 79801 | 7.09781253   | 6.0717755 | 8.123849527  | -0.352108471 | -0.352108471 | -0.352108471 |
| 79803 | -0.352108471 | -0.352108 | -0.352108471 | 4.331576758  | 4.456886199  | 4.582195641  |
| 79809 | 5.463922025  | 5.0114031 | 5.916440999  | 2.259334908  | 4.249323288  | 3.254329098  |
| 79810 | 4.878665478  | 4.9140225 | 4.843308497  | 4.817531639  | 3.919505936  | 5.715557343  |
| 79812 | 3.993415015  | 3.4733142 | 3.733364623  | 6.254738707  | 5.840361047  | 5.425983388  |
| 79813 | 5.321063837  | 3.7486371 | 4.534850492  | -0.352108471 | -0.352108471 | -0.352108471 |
| 79814 | 8.060414377  | 7.9748192 | 8.146009552  | 6.07919154   | 5.775231583  | 6.383151496  |
| 79817 | 2.351086241  | 5.054281  | -0.352108471 | 4.178899946  | 4.245214285  | 4.112585606  |
| 79827 | 6.151585628  | 3.8856123 | 8.417558994  | 4.416483494  | 5.510999071  | 6.605514649  |
| 79829 | 3.666474075  | 5.7232059 | 4.694839979  | 4.271568891  | 3.470468384  | 2.669367877  |
| 79834 | 4.059425208  | 9.1967713 | 6.628098252  | 5.036590978  | 6.519972795  | 8.003354613  |
| 79837 | -0.352108471 | -0.352108 | -0.352108471 | 7.269778778  | 3.882188675  | 5.575983727  |
| 79838 | 7.014830488  | 7.0441776 | 6.985483415  | 4.976042035  | 5.191222747  | 4.760861323  |
| 79840 | 5.392000621  | 5.5293114 | 5.254689875  | 0.044132154  | -0.352108471 | 0.440372779  |
| 79845 | 4.231097311  | 5.2729017 | 3.189292972  | 0.624614178  | 0.440372779  | 0.808855576  |
| 79847 | 3.919505936  | 5.5054799 | 2.333531941  | 5.393523004  | 3.303298811  | 7.483747198  |
| 79850 | 6.056053999  | 6.6090268 | 5.503081194  | 8.848072569  | 1.409454702  | 5.128763636  |
| 79856 | 6.845389604  | 7.3666387 | 6.324140492  | 6.584605723  | 7.342869719  | 5.826341728  |
| 79862 | 6.749007119  | 7.2597847 | 7.770562357  | 4.675013723  | 5.706418     | 5.190715862  |
| 79866 | 5.150781781  | 4.3249473 | 5.976616275  | -0.352108471 | -0.352108471 | -0.352108471 |
| 79867 | 4.981477599  | 4.5700591 | 4.158640595  | 0.228373553  | 0.808855576  | -0.352108471 |
| 79868 | -0.352108471 | -0.352108 | -0.352108471 | 4.04487627   | 6.12990004   | 8.21492381   |
| 79872 | -0.352108471 | -0.352108 | -0.352108471 | 6.86293602   | 6.513185958  | 7.212686082  |
| 79874 | 3.978133825  | 5.6251608 | 7.272187717  | -0.352108471 | -0.352108471 | -0.352108471 |
| 79875 | -0.352108471 | -0.352108 | -0.352108471 | 6.187912724  | 6.110762977  | 6.149337851  |
| 79876 | 4.721636369  | 6.3958994 | 5.55876787   | 6.165870606  | 6.822797624  | 5.508943588  |
| 79877 | -0.352108471 | -0.352108 | -0.352108471 | 8.00650318   | 7.15770761   | 6.30891204   |
| 79879 | 6.397175529  | 6.0736545 | 6.720696571  | 4.208083493  | 2.100935855  | 6.31523113   |
| 79882 | 6.882935672  | 6.2650023 | 6.573968999  | 6.677030402  | 5.042204336  | 5.859617369  |
| 79883 | 2.351086241  | 3.1415013 | 1.56067119   | -0.352108471 | -0.352108471 | -0.352108471 |
| 79884 | 6.537383725  | 5.5664223 | 7.508345163  | 0.808855576  | 0.808855576  | 0.808855576  |
| 79885 | -0.352108471 | -0.352108 | -0.352108471 | 6.804608153  | 5.07377629   | 5.939192221  |
| 79888 | 5.852937462  | 5.873346  | 5.832528937  | -0.352108471 | -0.352108471 | -0.352108471 |
| 79890 | -0.352108471 | -0.352108 | -0.352108471 | 4.624397093  | 5.704335255  | 6.784273416  |
| 79892 | 3.318185829  | 2.6505957 | 1.98300551   | 7.329088911  | 6.776532209  | 7.881645613  |
| 79893 | -0.352108471 | -0.352108 | -0.352108471 | 3.833412591  | 2.686833264  | 4.979991919  |
| 79895 | -0.352108471 | -0.352108 | -0.352108471 | 5.923493182  | 6.150741123  | 5.696245241  |
| 79898 | -0.352108471 | -0.352108 | -0.352108471 | 5.44039385   | 6.699694083  | 6.070043966  |

|       |              |           |              |              |              |              |
|-------|--------------|-----------|--------------|--------------|--------------|--------------|
| 79901 | 8.129211415  | 6.2738323 | 4.418453103  | 5.500077446  | 5.458255064  | 5.416432682  |
| 79902 | -0.352108471 | -0.352108 | -0.352108471 | 5.511864271  | 3.999923266  | 7.023805276  |
| 79903 | -0.352108471 | -0.352108 | -0.352108471 | 7.019487643  | 6.502079754  | 7.536895532  |
| 79905 | 5.268429393  | 5.3413269 | 5.414224389  | 6.269744616  | 5.92800466   | 5.586264704  |
| 79917 | -0.352108471 | -0.352108 | -0.352108471 | 4.536671833  | 2.225499476  | 3.381085654  |
| 79921 | 3.805664353  | 5.018169  | 2.59315972   | 5.872307495  | 7.46119765   | 4.283417339  |
| 79923 | 5.974545641  | 8.5550666 | 7.264806117  | 6.896276597  | 6.034905799  | 7.757647395  |
| 79924 | 8.069039817  | 6.7699938 | 5.470947834  | 5.525602066  | 5.323975643  | 5.424788855  |
| 79929 | 6.288510867  | 7.9246294 | 4.652392332  | -0.352108471 | -0.352108471 | -0.352108471 |
| 79931 | 4.478306873  | 8.5964606 | 6.537383725  | -0.352108471 | -0.352108471 | -0.352108471 |
| 79932 | 6.857268256  | 6.8980976 | 6.938926904  | 8.275668882  | 5.808082345  | 7.041875613  |
| 79933 | 6.995223439  | 7.3267668 | 7.658310125  | 7.278477476  | 7.218779379  | 7.338175573  |
| 79939 | 6.440349559  | 6.8325729 | 7.224796305  | 7.308855623  | 7.376708576  | 7.241002671  |
| 79940 | 2.732117059  | 5.7142657 | 8.696414335  | 0.975533543  | 0.808855576  | 1.14221151   |
| 79943 | 6.941311974  | 6.6718746 | 6.402437303  | 2.024343053  | 2.051108653  | 1.997577452  |
| 79944 | 11.46433596  | 12.341692 | 11.90301375  | 10.24233349  | 9.25870823   | 11.22595875  |
| 79954 | 5.956452551  | 6.056054  | 6.155655447  | 6.122040588  | 6.022050925  | 5.922061262  |
| 79962 | 5.742452228  | 5.2483042 | 4.75415608   | 4.201099247  | 3.400188256  | 5.002010239  |
| 79966 | 7.2574548    | 8.1107521 | 6.404157471  | 6.541302808  | 6.77736617   | 7.013429532  |
| 79968 | 5.659195707  | 3.8526025 | 7.465788864  | 6.13283526   | 5.169252326  | 7.096418193  |
| 79971 | -0.352108471 | -0.352108 | -0.352108471 | 6.369156591  | 4.483354272  | 8.254958909  |
| 79974 | -0.352108471 | -0.352108 | -0.352108471 | 1.831525138  | 2.585128717  | 3.338732297  |
| 79977 | 7.17777694   | 6.2543398 | 8.101214072  | -0.352108471 | -0.352108471 | -0.352108471 |
| 79979 | 7.13178117   | 6.9946748 | 6.857568352  | 4.371868981  | 6.923287786  | 5.647578383  |
| 79987 | -0.352108471 | -0.352108 | -0.352108471 | 2.397492216  | -0.352108471 | 5.147092904  |
| 79989 | 7.496068808  | 6.8354301 | 6.174791302  | 6.673694267  | 6.492891233  | 6.312088198  |
| 79990 | -0.352108471 | -0.352108 | -0.352108471 | 6.186562848  | 5.709591052  | 6.663534645  |
| 79993 | 6.049511629  | 5.2216669 | 4.393822196  | 4.373002436  | 6.066266721  | 2.679738151  |
| 79998 | -0.352108471 | -0.352108 | -0.352108471 | 4.13623093   | 11.64596747  | 7.8910992    |
| 80005 | -0.352108471 | -0.352108 | -0.352108471 | 6.466140449  | 6.204656258  | 5.943172067  |
| 80008 | 6.437194531  | 5.0826197 | 3.728044812  | 0.939116071  | 1.437859363  | 0.440372779  |
| 80011 | 6.573968999  | 9.43788   | 3.710057951  | -0.352108471 | -0.352108471 | -0.352108471 |
| 80012 | 8.525375615  | 10.552734 | 6.498017297  | 7.338548995  | 7.827114021  | 6.84998397   |
| 80013 | -0.352108471 | -0.352108 | -0.352108471 | 4.66005769   | 4.544219328  | 4.775896051  |
| 80014 | 3.513288917  | 7.8639564 | 5.688622647  | 4.28305004   | 5.095423988  | 5.907797936  |
| 80019 | 6.748789459  | 6.1215288 | 5.494268079  | 5.317943336  | 7.09136918   | 6.204656258  |
| 80022 | -0.352108471 | -0.352108 | -0.352108471 | 2.146123334  | 2.191310813  | 2.100935855  |
| 80023 | 6.768395908  | 5.8529375 | 4.937479015  | 6.642214975  | 6.23567117   | 5.829127366  |
| 80028 | 8.334697496  | 7.5720419 | 9.097353082  | 7.191434148  | 8.325203573  | 7.75831886   |
| 80032 | 5.452723741  | 4.574195  | 6.33125245   | 3.538105901  | -0.581711188 | 1.478197356  |
| 80035 | 6.305519736  | 6.2558778 | 6.355161685  | 5.237204548  | 5.494417177  | 4.979991919  |
| 80039 | 5.035222837  | 5.2218394 | 4.848606265  | 2.460720591  | 4.790473589  | 0.130967593  |
| 80055 | -0.352108471 | -0.352108 | -0.352108471 | 0.897715333  | -0.352108471 | 2.147539136  |
| 80069 | 6.140087083  | 4.955018  | 7.325156207  | 1.371545024  | 1.437859363  | 1.305230684  |
| 80071 | -0.352108471 | -0.352108 | -0.352108471 | 4.179667512  | 5.529311366  | 6.87895522   |
| 80095 | -0.352108471 | -0.352108 | -0.352108471 | 2.139844176  | -0.352108471 | 4.631796822  |
| 80097 | -0.352108471 | -0.352108 | -0.352108471 | 8.982924358  | 7.605055129  | 6.2271859    |

|       |              |           |              |              |              |              |
|-------|--------------|-----------|--------------|--------------|--------------|--------------|
| 80099 | -0.352108471 | -0.352108 | -0.352108471 | 4.067191766  | 2.481575183  | 0.8959586    |
| 80111 | -0.352108471 | -0.352108 | -0.352108471 | 5.809683002  | 5.821410838  | 5.833138673  |
| 80115 | 3.246640567  | 3.1563093 | 3.336971836  | -0.352108471 | -0.352108471 | -0.352108471 |
| 80131 | 6.387314214  | 3.5067002 | 4.947007189  | 0.323567339  | 6.173804703  | 3.248686021  |
| 80139 | 7.458282885  | 7.474041  | 7.442524773  | 7.792722561  | 7.822192666  | 7.763252455  |
| 80142 | -0.352108471 | -0.352108 | -0.352108471 | 5.120327044  | 6.64789689   | 8.175466735  |
| 80143 | 8.283240037  | 5.5207185 | 6.901979267  | 2.960272696  | 2.169424975  | 1.378577254  |
| 80144 | 5.428393874  | 5.3441924 | 5.512595355  | -0.352108471 | -0.352108471 | -0.352108471 |
| 80145 | 7.137727412  | 6.0373568 | 8.238098054  | -0.352108471 | -0.352108471 | -0.352108471 |
| 80146 | 6.396868383  | 6.3057999 | 6.48793683   | -0.352108471 | -0.352108471 | -0.352108471 |
| 80148 | 6.450302837  | 4.0443467 | 8.856258988  | -0.352108471 | -0.352108471 | -0.352108471 |
| 80149 | 5.55876787   | 3.5973355 | 7.520200199  | -0.352108471 | -0.352108471 | -0.352108471 |
| 80150 | -0.352108471 | -0.352108 | -0.352108471 | 4.50955308   | 4.604936301  | 4.557244691  |
| 80152 | -0.352108471 | -0.352108 | -0.352108471 | 6.020381091  | 5.903450087  | 6.137312096  |
| 80161 | 6.083216808  | 5.9649007 | 6.201532907  | -0.352108471 | -0.352108471 | -0.352108471 |
| 80162 | -0.352108471 | -0.352108 | -0.352108471 | 7.794659744  | 5.821410838  | 3.848161932  |
| 80168 | 5.341183412  | 5.2849744 | 5.2287653    | -0.352108471 | -0.352108471 | -0.352108471 |
| 80169 | 1.817698148  | 1.3835202 | 0.949342163  | 5.982003862  | 4.822573544  | 7.141434179  |
| 80173 | 7.582976966  | 5.3546856 | 3.126394332  | 5.750895627  | 4.459483409  | 5.105189518  |
| 80176 | -0.352108471 | -0.352108 | -0.352108471 | 7.232000306  | 7.241236027  | 7.222764584  |
| 80196 | 4.954109947  | 5.7494021 | 6.544694281  | -0.352108471 | -0.352108471 | -0.352108471 |
| 80198 | 3.153505157  | 3.3377466 | 3.245625856  | -0.352108471 | -0.352108471 | -0.352108471 |
| 80199 | -0.352108471 | -0.352108 | -0.352108471 | 5.101230542  | 5.001788697  | 4.902346851  |
| 80204 | 5.344627021  | 3.6023395 | 7.086914527  | 2.70315649   | 2.357098027  | 2.011039563  |
| 80207 | 5.225205553  | 6.2330281 | 4.217383012  | -0.352108471 | -0.352108471 | -0.352108471 |
| 80210 | 7.331818668  | 8.0932309 | 7.712524769  | 7.273823363  | 7.300708227  | 7.246938498  |
| 80212 | 5.980334028  | 6.0023087 | 5.958359385  | 6.087644454  | 6.101634422  | 6.073654487  |
| 80213 | -0.352108471 | -0.352108 | -0.352108471 | 3.501347858  | 6.689500118  | 5.095423988  |
| 80216 | 1.501017585  | -0.352108 | 3.354143641  | 3.919505936  | 3.919505936  | 3.919505936  |
| 80217 | 4.329518547  | 5.7644547 | 5.046986617  | -0.352108471 | -0.352108471 | -0.352108471 |
| 80218 | 5.017136436  | 6.3141882 | 3.720084686  | 6.056053999  | 4.376227265  | 7.735880733  |
| 80219 | 5.451868246  | 6.9076477 | 8.363427245  | 6.008180529  | 7.084947944  | 8.161715359  |
| 80222 | 6.217176725  | 6.5524721 | 6.887767429  | 3.968083022  | 8.737567406  | 6.352825214  |
| 80223 | 6.642574621  | 8.3147025 | 7.478638566  | 4.282405722  | 4.826488843  | 5.370571964  |
| 80224 | 9.006623652  | 5.9666155 | 7.486619561  | 5.450612119  | 6.561463791  | 7.672315462  |
| 80227 | 5.939192221  | 6.1237857 | 5.754598785  | -0.352108471 | -0.352108471 | -0.352108471 |
| 80228 | 9.475093445  | 9.4702768 | 9.479910088  | 8.630178311  | 8.531441672  | 8.72891495   |
| 80232 | 6.991085456  | 6.083682  | 6.537383725  | 1.839745951  | 4.456886199  | 7.074026448  |
| 80233 | -0.352108471 | -0.352108 | -0.352108471 | 1.551002809  | 3.384482817  | 5.217962826  |
| 80256 | -0.352108471 | -0.352108 | -0.352108471 | 6.264160615  | 5.455074122  | 5.859617369  |
| 80258 | -0.352108471 | -0.352108 | -0.352108471 | 4.234381997  | 5.315258837  | 3.153505157  |
| 80263 | 5.758523395  | 4.5321109 | 6.984935849  | 2.973271304  | 3.519327359  | 4.065383413  |
| 80264 | 6.954346295  | 7.3154815 | 6.593211042  | 3.682181533  | 4.245214285  | 3.119148782  |
| 80270 | 6.414258136  | 5.7945951 | 7.033921129  | 0.598807818  | 1.549724107  | -0.352108471 |
| 80273 | 3.054232215  | 4.5503078 | 6.046383388  | 5.125131444  | 6.784412458  | 8.443693473  |
| 80274 | -0.352108471 | -0.352108 | -0.352108471 | 3.389667979  | 2.147539136  | 4.631796822  |
| 80279 | -0.352108471 | -0.352108 | -0.352108471 | 6.266367194  | 9.854579127  | 2.67815526   |

|       |              |           |              |              |              |              |
|-------|--------------|-----------|--------------|--------------|--------------|--------------|
| 80301 | -0.352108471 | -0.352108 | -0.352108471 | 5.694437461  | 6.872782744  | 8.051128027  |
| 80305 | 6.432653401  | 4.6155835 | 2.798513626  | 5.095423988  | 6.816761615  | 3.374086361  |
| 80306 | -0.352108471 | -0.352108 | -0.352108471 | 5.026688316  | 4.148619868  | 5.904756765  |
| 80307 | 6.458623164  | 5.7838824 | 5.109141713  | 7.152873735  | 0.072605572  | 3.612739653  |
| 80311 | 7.07131791   | 5.5356046 | 6.303461245  | -0.352108471 | -0.352108471 | -0.352108471 |
| 80312 | 7.560829242  | 5.4093158 | 6.485072534  | -0.352108471 | -0.352108471 | -0.352108471 |
| 80317 | 9.820234852  | 9.8153882 | 9.825081469  | 8.366100887  | 8.413151789  | 8.319049985  |
| 80321 | 5.343591945  | 6.502263  | 7.660934112  | -0.352108471 | -0.352108471 | -0.352108471 |
| 80324 | -0.352108471 | -0.352108 | -0.352108471 | 6.79867074   | 6.689878453  | 6.907463027  |
| 80325 | -0.352108471 | -0.352108 | -0.352108471 | 6.729377134  | 5.983736712  | 5.23809629   |
| 80331 | 5.463922025  | 7.6193778 | 3.308466291  | 8.475881183  | 7.234851541  | 5.9938219    |
| 80333 | -0.352108471 | -0.352108 | -0.352108471 | 7.002741396  | 6.204656258  | 5.40657112   |
| 80335 | 6.349191313  | 6.2424418 | 6.455940863  | 9.230048536  | 5.557121845  | 7.39358519   |
| 80339 | 4.019632967  | 6.6433219 | 5.331477429  | 2.678098132  | 3.99590524   | 3.337001686  |
| 80344 | 1.383520155  | -0.352108 | 3.119148782  | 1.374300821  | 1.939746065  | 0.808855576  |
| 80346 | -0.352108471 | -0.352108 | -0.352108471 | 5.325716078  | 5.336173319  | 5.315258837  |
| 80351 | -0.352108471 | -0.352108 | -0.352108471 | 6.554659539  | 6.165870606  | 5.777081673  |
| 80381 | 7.402710261  | 7.4288784 | 7.415794329  | 7.855473441  | 10.42750473  | 5.283442148  |
| 80700 | -0.352108471 | -0.352108 | -0.352108471 | 7.242521962  | 5.039883593  | 9.445160332  |
| 80704 | 5.079283667  | 5.3152588 | 4.843308497  | 1.530736894  | 0.808855576  | 2.252618212  |
| 80709 | 6.072281416  | 5.1234227 | 5.597852034  | 4.121930465  | -0.952331984 | 1.58479924   |
| 80712 | 4.014810134  | 6.573969  | 9.133127865  | -0.352108471 | -0.352108471 | -0.352108471 |
| 80724 | -0.352108471 | -0.352108 | -0.352108471 | 6.029083441  | 5.550442011  | 5.789762726  |
| 80727 | 6.272113412  | 7.4218008 | 6.846957097  | 8.11139689   | 8.824423311  | 7.39837047   |
| 80731 | 8.611833514  | 3.0940414 | 5.852937462  | -0.352108471 | -0.352108471 | -0.352108471 |
| 80736 | 6.413550728  | 5.3564725 | 4.299394212  | 1.227667732  | 0.808855576  | 1.646479888  |
| 80741 | 4.197102645  | 5.6167433 | 7.036384002  | -0.352108471 | -0.352108471 | -0.352108471 |
| 80742 | 5.8261513    | 6.3691566 | 6.912161881  | -0.352108471 | -0.352108471 | -0.352108471 |
| 80757 | 6.396868383  | 7.2213223 | 5.572414434  | -0.352108471 | -0.352108471 | -0.352108471 |
| 80758 | -0.352108471 | -0.352108 | -0.352108471 | 5.017136436  | 5.054280952  | 4.979991919  |
| 80759 | 4.91726567   | 7.7476677 | 6.332466669  | 2.039485684  | -0.352108471 | 4.43107984   |
| 80760 | 7.825105859  | 7.2592139 | 8.390997824  | 6.029076362  | 4.651904177  | 3.274731991  |
| 80761 | 7.48354716   | 5.3564725 | 3.22939778   | 1.789517331  | 1.588701675  | 1.689109503  |
| 80762 | 7.925631762  | 6.7357797 | 5.54592761   | 2.65949763   | 2.211943219  | 1.764388808  |
| 80772 | 7.289777346  | 7.244076  | 7.335478698  | 4.08236011   | 4.245214285  | 3.919505936  |
| 80776 | -0.352108471 | -0.352108 | -0.352108471 | 4.724955416  | 6.149337851  | 7.573720285  |
| 80777 | 7.601933332  | 7.5785512 | 7.625315436  | 6.022050925  | 6.526286131  | 5.517815719  |
| 80778 | 6.173033727  | 10.319567 | 8.246300486  | 7.248883109  | 7.381678228  | 7.315280669  |
| 80781 | 1.392109249  | 3.136327  | -0.352108471 | 5.637296679  | 5.653299811  | 5.621293547  |
| 80789 | 9.671328132  | 3.2220535 | 6.446690805  | -0.352108471 | -0.352108471 | -0.352108471 |
| 80790 | -0.352108471 | -0.352108 | -0.352108471 | 5.871599621  | 3.042172777  | 4.456886199  |
| 80821 | 7.531970087  | 5.5207125 | 3.50945491   | 4.950315419  | 5.005105417  | 4.977710418  |
| 80829 | 7.217317616  | 7.2305473 | 7.204087928  | -0.352108471 | -0.352108471 | -0.352108471 |
| 80830 | 3.669750275  | 1.8514872 | 2.760618758  | 6.386519472  | 7.576425126  | 5.196613819  |
| 80832 | 9.544510253  | 9.2432265 | 8.941942751  | 5.50311456   | 11.52900119  | 8.516057875  |
| 80851 | 5.900703788  | 3.8056644 | 1.710624918  | 6.613428537  | 2.387605953  | 10.83925112  |
| 80852 | -0.352108471 | -0.352108 | -0.352108471 | 2.802945389  | 2.051108653  | 3.554782125  |



|       |              |           |              |              |              |              |
|-------|--------------|-----------|--------------|--------------|--------------|--------------|
| 80856 | 3.763205746  | 5.8984915 | 8.033777209  | 3.919505936  | 2.790821184  | 5.048190687  |
| 80862 | -0.352108471 | -0.352108 | -0.352108471 | 5.707365561  | 6.764476761  | 6.235921161  |
| 81029 | 6.893765651  | 7.0898244 | 6.991795048  | 0.14959489   | 2.064739793  | 3.979884696  |
| 81031 | -0.352108471 | -0.352108 | -0.352108471 | 5.060879346  | 10.22122578  | 7.641052565  |
| 81033 | 2.065292044  | -0.352108 | 4.482692559  | 1.804300246  | 1.731739118  | 1.876861374  |
| 81034 | 6.791156986  | 6.9092955 | 6.850226219  | 6.225937921  | 5.228208078  | 7.223667764  |
| 81037 | 3.156147497  | 3.5151412 | 3.874134975  | 5.094707026  | 6.682822443  | 8.270937859  |
| 81050 | -0.352108471 | -0.352108 | -0.352108471 | 5.723485516  | 5.731413688  | 5.715557343  |
| 81285 | 4.331087074  | 4.3347012 | 4.338315403  | 0.685292531  | 0.440372779  | 0.930212283  |
| 81343 | 6.121528769  | 6.1414231 | 6.101634422  | -0.352108471 | -0.352108471 | -0.352108471 |
| 81490 | 4.910921778  | 8.7228883 | 6.816905042  | -0.352108471 | -0.352108471 | -0.352108471 |
| 81493 | 5.559971507  | 4.0364682 | 7.083474795  | 4.920275323  | 5.816563325  | 5.368419324  |
| 81502 | 5.935502203  | 6.056054  | 6.176605795  | 7.267174057  | 7.932090689  | 7.599632373  |
| 81532 | -0.352108471 | -0.352108 | -0.352108471 | 5.412561087  | 4.711054194  | 6.114067981  |
| 81537 | 7.820641569  | 5.0459959 | 6.433318728  | -0.352108471 | -0.352108471 | -0.352108471 |
| 81539 | 8.240762624  | 8.2416329 | 8.239892398  | 7.617156715  | 1.968135913  | 4.792646314  |
| 81542 | 6.63987902   | 5.4481128 | 6.043995933  | 7.465370061  | 5.082850362  | 9.84788976   |
| 81543 | 6.753841062  | 6.4251279 | 6.096414808  | 3.560919742  | -1.446833482 | 1.05704313   |
| 81544 | -0.352108471 | -0.352108 | -0.352108471 | 6.050502124  | 4.812540974  | 7.288463274  |
| 81550 | 8.096039735  | 5.4514418 | 6.77374078   | -0.352108471 | -0.352108471 | -0.352108471 |
| 81552 | 5.939192221  | 7.2736407 | 4.604743704  | 7.640972487  | 7.130842071  | 6.620711656  |
| 81555 | 7.93299766   | 1.6398081 | 4.786402873  | 2.473055456  | 4.532271743  | 3.5026636    |
| 81556 | 7.480178217  | 6.7052875 | 5.930396807  | -0.352108471 | -0.352108471 | -0.352108471 |
| 81563 | 2.168802966  | 5.0171364 | 7.865469905  | -0.352108471 | -0.352108471 | -0.352108471 |
| 81565 | 5.349194799  | 5.5587679 | 5.768340942  | 8.045831352  | 3.720936301  | 5.883383827  |
| 81566 | 6.705287512  | 6.7206966 | 6.689878453  | 1.873849414  | 1.939746065  | 1.807952763  |
| 81569 | 4.048231905  | 1.2529594 | 2.65059567   | -0.352108471 | -0.352108471 | -0.352108471 |
| 81570 | 8.169438337  | 4.6971991 | 6.433318728  | -0.352108471 | -0.352108471 | -0.352108471 |
| 81571 | 5.17910263   | 6.3691566 | 7.559210551  | -0.352108471 | -0.352108471 | -0.352108471 |
| 81575 | 7.524733284  | 7.0128211 | 8.036645486  | 6.454261972  | 6.887913509  | 6.020610435  |
| 81576 | 5.546246248  | 3.839732  | 4.692989119  | 4.983644395  | 5.845499835  | 6.707355275  |
| 81577 | -0.352108471 | -0.352108 | -0.352108471 | 3.585121301  | 4.316315393  | 2.85392721   |
| 81603 | 5.000596186  | 5.6574939 | 6.314391576  | 5.977010385  | 6.6560422    | 7.335074016  |
| 81605 | 5.688622647  | 3.6926662 | 7.684579142  | 3.11131689   | 5.958359385  | 8.805401879  |
| 81606 | 6.332466669  | 6.2248677 | 6.44006562   | 7.37525479   | 8.754053886  | 10.13285298  |
| 81608 | 6.095923221  | 6.6400194 | 7.184115564  | 7.478462511  | 9.471973166  | 5.484951856  |
| 81609 | 8.41687693   | 6.0017252 | 3.586573424  | 6.528042901  | 3.952594664  | 9.103491137  |
| 81611 | 7.66556257   | 6.1937542 | 4.721945766  | 5.980334028  | 7.460936982  | 4.499731074  |
| 81614 | 5.441019591  | 6.9269084 | 6.183964016  | 3.322276022  | 8.789831976  | 6.056053999  |
| 81618 | 4.852471579  | 6.1350949 | 5.493783215  | 6.369156591  | 4.649101157  | 8.089212024  |
| 81619 | 4.98284752   | 5.4775912 | 5.972334837  | 5.95428886   | 6.041492036  | 5.867085684  |
| 81620 | 7.141316727  | 7.7751504 | 7.458233568  | 6.131354478  | 5.724668212  | 5.317981946  |
| 81624 | 6.428655029  | 6.7737408 | 7.11882653   | -0.352108471 | -0.352108471 | -0.352108471 |
| 81628 | 4.960006502  | 6.573969  | 8.187931497  | 5.578083691  | 5.369332089  | 5.160580486  |
| 81631 | -0.352108471 | -0.352108 | -0.352108471 | 8.078573586  | 11.11468453  | 5.042462646  |
| 81669 | -0.352108471 | -0.352108 | -0.352108471 | 5.551463511  | 5.627005534  | 5.702547557  |
| 81671 | 3.805664353  | 3.5661822 | 4.045146534  | 7.263979321  | 7.013360586  | 6.762741852  |

|       |              |           |              |              |              |              |
|-------|--------------|-----------|--------------|--------------|--------------|--------------|
| 81688 | 4.169764452  | 5.6886226 | 7.207480842  | 0.727922146  | 1.807952763  | -0.352108471 |
| 81689 | 5.981703702  | 6.1045589 | 6.227414164  | -0.352108471 | -0.352108471 | -0.352108471 |
| 81786 | -0.352108471 | -0.352108 | -0.352108471 | 7.093911607  | 5.47719731   | 6.285554459  |
| 81788 | 8.304448046  | 8.8493567 | 8.576902394  | 7.402947837  | 7.399343256  | 7.395738674  |
| 81790 | 8.439221476  | 4.8021397 | 6.620680601  | 6.170030093  | 8.853589904  | 3.486470282  |
| 81792 | 6.369156591  | 7.6149171 | 5.12339607   | 7.133757538  | 5.458330193  | 6.296043865  |
| 81793 | 4.303637301  | 7.5778813 | 5.940759291  | 5.975693713  | 7.299166056  | 6.637429884  |
| 81796 | 5.552256259  | 5.9391922 | 6.326128184  | -0.352108471 | -0.352108471 | -0.352108471 |
| 81831 | -0.352108471 | -0.352108 | -0.352108471 | 5.679126224  | 6.596757815  | 7.514389407  |
| 81833 | -0.352108471 | -0.352108 | -0.352108471 | 6.345275458  | 6.355161685  | 6.33538923   |
| 81839 | -0.352108471 | -0.352108 | -0.352108471 | 6.609543024  | 6.63062078   | 6.588465267  |
| 81844 | 4.469588097  | 6.5047179 | 5.487153005  | 3.301549522  | 7.165585325  | 5.233567424  |
| 81846 | 6.609632567  | 2.9273409 | 4.768486756  | 0.685292531  | 0.440372779  | 0.930212283  |
| 81854 | 5.327034875  | 2.9166574 | 4.121846117  | 3.40194973   | 1.394637337  | 5.409262124  |
| 81855 | 1.596610088  | 3.6368248 | 5.677039489  | 7.330399645  | 5.698786261  | 6.514592953  |
| 81857 | 4.878665478  | 4.4509656 | 5.306365389  | 7.695698749  | 5.369185218  | 6.532441983  |
| 81858 | -0.352108471 | -0.352108 | -0.352108471 | 6.569711703  | 5.876952844  | 5.184193986  |
| 81873 | 6.205676296  | 8.4050067 | 7.305341479  | 7.460593074  | 6.225677256  | 6.843135165  |
| 81875 | -0.352108471 | -0.352108 | -0.352108471 | 5.713389324  | 6.621168045  | 7.528946767  |
| 81876 | 5.284974356  | 6.3863441 | 4.183604637  | 6.407504925  | 7.965839464  | 9.524174003  |
| 81887 | 4.817531639  | 3.1479137 | 6.487149554  | 6.01226783   | 5.88700099   | 5.761734149  |
| 81888 | 3.533617112  | 5.1841515 | 6.834685871  | 5.830338531  | 7.842089107  | 6.836213819  |
| 81890 | 5.089412202  | 4.284452  | 5.894372392  | -0.352108471 | -0.352108471 | -0.352108471 |
| 81892 | 4.025174714  | 3.136327  | 4.914022459  | 6.204656258  | 6.215464554  | 6.193847962  |
| 81926 | -0.352108471 | -0.352108 | -0.352108471 | 7.261502113  | 7.129581018  | 7.195541565  |
| 81929 | 4.85156964   | 5.9575452 | 7.063520775  | -0.352108471 | -0.352108471 | -0.352108471 |
| 81930 | 2.705934611  | 6.6895379 | 10.67314126  | 3.59425584   | 3.575986763  | 3.585121301  |
| 81931 | -0.352108471 | -0.352108 | -0.352108471 | 7.126019756  | 4.178899946  | 1.231780135  |
| 83259 | 10.78863045  | 8.6646778 | 9.726654142  | 7.335317928  | 8.910309521  | 8.122813725  |
| 83394 | 3.527916452  | 3.136327  | 3.919505936  | 2.051108653  | 2.051108653  | 2.051108653  |
| 83439 | 5.775846281  | 5.6522715 | 5.528696668  | 1.683074947  | 5.095423988  | 8.507773029  |
| 83440 | 5.824288785  | 5.9190303 | 5.7295473    | -0.352108471 | -0.352108471 | -0.352108471 |
| 83442 | 10.13296842  | 9.526807  | 9.82988773   | 10.63675203  | 9.507510392  | 10.07213121  |
| 83445 | 9.691724195  | 8.1575603 | 6.623396417  | 7.444268716  | 6.12576271   | 6.785015713  |
| 83451 | 4.53675364   | 7.7273456 | 6.132049638  | 5.574991057  | 6.75763359   | 7.940276124  |
| 83452 | 9.0329577    | 5.2649508 | 7.148954265  | 6.66302406   | 6.564854867  | 6.761193252  |
| 83460 | -0.352108471 | -0.352108 | -0.352108471 | 3.515457114  | 3.44626434   | 3.377071566  |
| 83461 | 5.085883833  | 6.1494001 | 5.617641948  | 6.963850182  | 6.255235865  | 6.609543024  |
| 83464 | 7.208169218  | 6.8768769 | 7.042523083  | -0.352108471 | -0.352108471 | -0.352108471 |
| 83468 | -0.352108471 | -0.352108 | -0.352108471 | 7.724438171  | 4.57423753   | 6.149337851  |
| 83541 | -0.352108471 | -0.352108 | -0.352108471 | 3.245625856  | 3.337746555  | 3.153505157  |
| 83544 | 9.602240643  | 6.1588    | 7.880520335  | 7.656950668  | 5.614332304  | 9.699569031  |
| 83547 | 3.497339483  | 5.3910182 | 7.284696846  | -0.352108471 | -0.352108471 | -0.352108471 |
| 83549 | 7.114527862  | 5.0670888 | 6.090808341  | -0.352108471 | -0.352108471 | -0.352108471 |
| 83590 | 6.734743009  | 6.3968684 | 6.058993756  | 6.251749538  | 7.269863612  | 8.287977686  |
| 83595 | 6.703944702  | 5.5062399 | 4.30853501   | 4.029859974  | 1.835742592  | -0.358374791 |
| 83596 | 3.092217044  | 8.7906513 | 5.941434187  | -0.352108471 | -0.352108471 | -0.352108471 |

|       |              |           |              |              |              |              |
|-------|--------------|-----------|--------------|--------------|--------------|--------------|
| 83604 | 8.110337885  | 5.7166399 | 6.913488898  | 3.886210183  | 8.081263241  | 5.983736712  |
| 83605 | 3.127737875  | 2.2629017 | 3.992574055  | 2.641611363  | 3.585121301  | 4.52863124   |
| 83606 | 5.980334028  | 4.6291393 | 7.331528728  | 1.345967809  | 1.14221151   | 1.549724107  |
| 83636 | 4.682964349  | 7.1926748 | 2.17325392   | 6.763616776  | 5.064465535  | 8.462768017  |
| 83637 | 6.212536209  | 5.7113495 | 6.713722927  | 6.56915909   | 6.33202207   | 6.806296109  |
| 83638 | 3.599161659  | 1.7104178 | 2.65478974   | 6.541009048  | 5.132500634  | 7.949517461  |
| 83641 | -0.352108471 | -0.352108 | -0.352108471 | 5.034557703  | 3.711447169  | 4.373002436  |
| 83642 | -0.352108471 | -0.352108 | -0.352108471 | 6.840114058  | 6.041234306  | 7.638993811  |
| 83648 | 5.463922025  | 5.5293114 | 5.398532684  | -0.352108471 | -0.352108471 | -0.352108471 |
| 83658 | 5.284491263  | 6.2642494 | 5.774370319  | 8.851320138  | 6.949901658  | 5.048483179  |
| 83660 | -0.352108471 | -0.352108 | -0.352108471 | 6.061426254  | 5.325716078  | 4.590005902  |
| 83667 | -0.352108471 | -0.352108 | -0.352108471 | 3.245625856  | 3.075216659  | 3.416035053  |
| 83692 | 2.456043316  | 7.6525186 | 5.054280952  | 5.354343885  | 5.745394463  | 6.136445041  |
| 83694 | 2.65059567   | 3.2783197 | 2.022871607  | 7.591869696  | 5.112024927  | 6.351947311  |
| 83695 | -0.352108471 | -0.352108 | -0.352108471 | 1.79770586   | 5.254651642  | 8.711597425  |
| 83696 | -0.352108471 | -0.352108 | -0.352108471 | 3.194371043  | 6.409798778  | 4.80208491   |
| 83698 | 6.71245091   | 5.5778117 | 6.145131319  | 0.791292145  | 0.440372779  | 1.14221151   |
| 83700 | 2.55641115   | 6.3968684 | 10.23732561  | 5.980334028  | 6.551763288  | 5.408904769  |
| 83714 | 4.544261391  | 4.2452143 | 4.843308497  | 1.530736894  | 2.252618212  | 0.808855576  |
| 83715 | -0.352108471 | -0.352108 | -0.352108471 | 1.957012451  | 3.245625856  | 4.534239261  |
| 83716 | 4.913028459  | 4.0160458 | 3.119063082  | 5.852863847  | 3.550773176  | 8.154954519  |
| 83719 | 7.309713553  | 6.8469571 | 6.384200641  | -0.352108471 | -0.352108471 | -0.352108471 |
| 83733 | 6.172221787  | 5.7494021 | 5.326582442  | -0.352108471 | -0.352108471 | -0.352108471 |
| 83742 | 7.204945658  | 7.6225236 | 8.0401015    | 3.886134936  | 9.169678294  | 6.527906615  |
| 83743 | 6.038513836  | 5.1289621 | 4.219410306  | 0.476561106  | -0.352108471 | 1.305230684  |
| 83746 | 6.705287512  | 6.9657259 | 6.444849091  | -0.352108471 | -0.352108471 | -0.352108471 |
| 83752 | 1.383520155  | -0.352108 | 3.119148782  | 8.906793545  | 4.686836214  | 6.796814879  |
| 83759 | -0.352108471 | -0.352108 | -0.352108471 | 8.849389674  | 5.723485516  | 2.597581357  |
| 83786 | 4.788579763  | 5.0396142 | 4.537545298  | 7.680837115  | 6.324316173  | 9.037358056  |
| 83787 | 6.888450633  | 7.1095361 | 6.667365196  | 5.471692453  | 4.93312003   | 6.010264877  |
| 83851 | 6.755500212  | 5.1562993 | 5.955899749  | -0.352108471 | -0.352108471 | -0.352108471 |
| 83852 | -0.352108471 | -0.352108 | -0.352108471 | 5.789762726  | 5.804293869  | 5.775231583  |
| 83853 | 4.59024713   | 5.5979093 | 6.605571409  | 1.929530708  | 2.051108653  | 1.807952763  |
| 83857 | 6.405937537  | 5.6407828 | 6.023360165  | 4.970473812  | 5.529886425  | 4.411061198  |
| 83860 | -0.352108471 | -0.352108 | -0.352108471 | 5.263851904  | 6.356508181  | 4.171195628  |
| 83867 | 5.774370319  | 5.825168  | 5.723572646  | -0.352108471 | -0.352108471 | -0.352108471 |
| 83871 | 2.065292044  | -0.352108 | 4.482692559  | 6.558608437  | 6.999484347  | 7.440360257  |
| 83873 | -0.352108471 | -0.352108 | -0.352108471 | 2.221964512  | 2.252618212  | 2.191310813  |
| 83874 | -0.352108471 | -0.352108 | -0.352108471 | 6.696345531  | 4.042318646  | 5.369332089  |
| 83877 | 4.018429536  | 4.7729096 | 5.527389745  | 0.598807818  | -0.352108471 | 1.549724107  |
| 83878 | 6.739745787  | 3.6952365 | 5.217491139  | -0.352108471 | -0.352108471 | -0.352108471 |
| 83881 | 3.326996042  | 5.6173207 | 4.472158387  | 0.727922146  | 1.807952763  | -0.352108471 |
| 83882 | -0.352108471 | -0.352108 | -0.352108471 | 5.300418005  | 4.89042997   | 5.095423988  |
| 83890 | 2.711561556  | 3.5963386 | 1.826784469  | -0.352108471 | -0.352108471 | -0.352108471 |
| 83891 | 6.461093679  | 3.9738886 | 5.217491139  | -0.352108471 | -0.352108471 | -0.352108471 |
| 83895 | 5.90029238   | 7.8826221 | 3.917962638  | 5.213645062  | 8.825330223  | 7.019487643  |
| 83931 | 5.980334028  | 6.0023087 | 5.958359385  | 6.866733042  | 6.880482436  | 6.852983648  |

|       |              |           |              |              |              |              |
|-------|--------------|-----------|--------------|--------------|--------------|--------------|
| 83933 | -0.352108471 | -0.352108 | -0.352108471 | 5.949545308  | 7.770557489  | 4.128533127  |
| 83937 | -0.352108471 | -0.352108 | -0.352108471 | 5.745394463  | 5.775231583  | 5.715557343  |
| 83939 | -0.352108471 | -0.352108 | -0.352108471 | 5.575983727  | 0.638891285  | 10.51307617  |
| 83982 | 5.085607333  | 6.9110537 | 3.260160947  | 5.529311366  | 5.529311366  | 5.529311366  |
| 83985 | 4.222001954  | 5.4937832 | 6.765564475  | 6.161839974  | 2.433438191  | 4.297639083  |
| 83990 | 8.579287539  | 10.059679 | 11.54007048  | 7.61604139   | 8.877367657  | 10.13869392  |
| 84033 | 5.289905506  | 6.5373837 | 7.784861943  | 3.572063041  | 5.336173319  | 1.807952763  |
| 84034 | 7.960102136  | 8.0006237 | 7.91958059   | 6.380541917  | 6.056053999  | 5.731566081  |
| 84056 | 4.434961537  | 7.2324736 | 10.02998575  | 7.723555937  | 6.071484426  | 6.897520181  |
| 84058 | -0.352108471 | -0.352108 | -0.352108471 | 6.204656258  | 6.700552881  | 5.708759635  |
| 84060 | 5.138735922  | 5.0522677 | 4.965799449  | 5.622844465  | 6.702534557  | 6.162689511  |
| 84061 | 7.594893599  | 8.7799869 | 8.187440272  | 3.606517346  | 4.491365131  | 2.721669562  |
| 84064 | 5.216665947  | 6.9984117 | 6.107538801  | -0.352108471 | -0.352108471 | -0.352108471 |
| 84065 | 5.581135637  | 6.6073775 | 7.633619281  | 5.488813385  | 4.80208491   | 4.115356435  |
| 84066 | -0.352108471 | -0.352108 | -0.352108471 | 1.688802714  | 1.939746065  | 1.437859363  |
| 84067 | -0.352108471 | -0.352108 | -0.352108471 | 5.811468301  | 4.716235508  | 5.263851904  |
| 84069 | 4.882035507  | 5.5529468 | 5.217491139  | -0.352108471 | -0.352108471 | -0.352108471 |
| 84075 | 6.020381091  | 6.7794102 | 5.26135198   | -0.352108471 | -0.352108471 | -0.352108471 |
| 84079 | 6.913488898  | 7.4964795 | 6.330498273  | -0.352108471 | -0.352108471 | -0.352108471 |
| 84080 | -0.352108471 | -0.352108 | -0.352108471 | 6.115657815  | 6.073654487  | 6.157661143  |
| 84081 | -0.352108471 | -0.352108 | -0.352108471 | 6.61077438   | 6.31657545   | 6.463674915  |
| 84085 | 4.928333285  | 5.0399701 | 4.984151706  | 5.596301458  | 6.177700521  | 5.88700099   |
| 84102 | 5.530278441  | 5.9413637 | 5.735821067  | 4.904478682  | 4.245214285  | 5.563743079  |
| 84105 | 3.336346647  | 5.0894122 | 6.842477757  | 3.749732623  | 6.342128298  | 5.045930461  |
| 84109 | 5.49470711   | 7.310019  | 6.402363066  | 0.044132154  | 0.440372779  | -0.352108471 |
| 84124 | 5.256268008  | 5.4582551 | 5.054280952  | 4.583433279  | 5.054280952  | 4.112585606  |
| 84128 | 6.033946416  | 5.4283939 | 4.822841332  | 2.80652814   | 1.776802743  | 3.836253538  |
| 84133 | 4.930470149  | 8.6739805 | 6.802225342  | 5.850983312  | 5.941434187  | 6.031885062  |
| 84141 | -0.352108471 | -0.352108 | -0.352108471 | 6.165870606  | 3.40664166   | 8.925099552  |
| 84142 | -0.352108471 | -0.352108 | -0.352108471 | 4.926329825  | 4.484531333  | 5.368128318  |
| 84144 | 5.187223787  | 5.7049355 | 6.222647281  | 1.437859363  | 1.437859363  | 1.437859363  |
| 84148 | 5.477780901  | 6.2420483 | 7.006315657  | -0.352108471 | -0.352108471 | -0.352108471 |
| 84153 | -0.352108471 | -0.352108 | -0.352108471 | 6.77374078   | 6.788420481  | 6.759061079  |
| 84159 | 3.127737875  | 3.136327  | 3.119148782  | 7.238918097  | 7.135139919  | 7.342696275  |
| 84162 | 5.828848464  | 5.825168  | 5.832528937  | 6.802382176  | 7.016299086  | 6.588465267  |
| 84163 | 2.423475267  | 3.5151412 | 4.606807204  | 0.897715333  | -0.352108471 | 2.147539136  |
| 84164 | -0.352108471 | -0.352108 | -0.352108471 | 3.959314364  | 8.339361337  | 6.149337851  |
| 84166 | 6.396868383  | 6.4105853 | 6.383151496  | 4.66005769   | 4.688318557  | 4.631796822  |
| 84168 | 2.65059567   | 4.8561664 | 0.445024936  | -0.352108471 | -0.352108471 | -0.352108471 |
| 84171 | -0.352108471 | -0.352108 | -0.352108471 | 6.566033225  | 7.607490017  | 5.524576432  |
| 84179 | -0.352108471 | -0.352108 | -0.352108471 | 7.800182135  | 4.774498542  | 1.748814948  |
| 84193 | -0.352108471 | -0.352108 | -0.352108471 | 5.760537073  | 5.290807752  | 6.230266394  |
| 84196 | 5.975693575  | 5.5231107 | 5.749402114  | 6.377541456  | 4.611292898  | 5.494417177  |
| 84197 | -0.352108471 | -0.352108 | -0.352108471 | 4.456886199  | 4.004094343  | 4.909678056  |
| 84216 | 9.035849875  | 6.7357797 | 4.435709497  | 2.301055037  | 4.954218546  | -0.352108471 |
| 84224 | -0.352108471 | -0.352108 | -0.352108471 | 4.595011698  | 3.736344232  | 2.877676766  |
| 84231 | 10.23880216  | 6.7545585 | 3.270314896  | 7.523606591  | 7.555244212  | 7.49196897   |

|       |              |           |              |              |              |              |
|-------|--------------|-----------|--------------|--------------|--------------|--------------|
| 84232 | 6.954675705  | 4.0058671 | 9.903484351  | 6.739974181  | 6.287974154  | 7.191974209  |
| 84243 | -0.352108471 | -0.352108 | -0.352108471 | 7.286324647  | 7.619331937  | 6.953317357  |
| 84245 | 7.309459055  | 6.693678  | 7.001568536  | 7.278740375  | 6.30917905   | 8.2483017    |
| 84246 | -0.352108471 | -0.352108 | -0.352108471 | 2.686833264  | 3.712925324  | 1.660741203  |
| 84247 | -0.352108471 | -0.352108 | -0.352108471 | 6.056053999  | 6.073654487  | 6.038453511  |
| 84255 | 2.351086241  | 2.5193947 | 2.182777795  | -0.352108471 | -0.352108471 | -0.352108471 |
| 84259 | 5.625160771  | 4.0277507 | 7.222570869  | 0.044132154  | -0.352108471 | 0.440372779  |
| 84262 | 6.433318728  | 6.4453648 | 6.421272681  | 5.637296679  | 5.653299811  | 5.621293547  |
| 84263 | -0.352108471 | -0.352108 | -0.352108471 | 6.056053999  | 4.835243577  | 7.27686442   |
| 84264 | -0.352108471 | -0.352108 | -0.352108471 | 3.245625856  | 2.167076618  | 4.324175094  |
| 84266 | -0.352108471 | -0.352108 | -0.352108471 | 5.821410838  | 6.47308539   | 5.169736286  |
| 84267 | 7.586996411  | 1.5722403 | 4.579618372  | 6.469055374  | 5.920555088  | 7.01755566   |
| 84268 | 2.211071469  | 7.8789804 | 5.045025943  | -0.352108471 | -0.352108471 | -0.352108471 |
| 84269 | 2.407155079  | 2.5232121 | 2.639269134  | 1.90830372   | 1.939746065  | 1.876861374  |
| 84271 | 4.501929911  | 3.8257343 | 5.178125502  | 6.736734301  | 8.13743452   | 7.43708441   |
| 84274 | -0.352108471 | -0.352108 | -0.352108471 | 6.204656258  | 6.215464554  | 6.193847962  |
| 84276 | 5.346492148  | 7.9679554 | 6.657223782  | 5.827895643  | 4.397545314  | 7.258245971  |
| 84277 | 5.267512683  | 5.8278956 | 6.388278602  | 5.010261535  | 3.959090419  | 6.061432651  |
| 84282 | -0.352108471 | -0.352108 | -0.352108471 | 3.417899765  | 6.748763753  | 5.083331759  |
| 84285 | 1.328794835  | 1.6698571 | 2.010919464  | 3.589288335  | 3.81023428   | 3.368342391  |
| 84286 | 7.466207166  | 10.507513 | 4.4249015    | 2.168105043  | 4.688318557  | -0.352108471 |
| 84287 | -0.352108471 | -0.352108 | -0.352108471 | 5.496431992  | 6.434644758  | 7.372857524  |
| 84293 | 7.352453156  | 7.9639646 | 6.740941743  | 3.801316843  | 2.073301066  | 0.345285289  |
| 84294 | 6.692705039  | 4.4052829 | 8.980127196  | 9.47737886   | 6.01555717   | 7.746468015  |
| 84296 | 4.889291061  | 5.8113861 | 5.350338576  | 1.525874689  | 3.980802614  | 2.753338652  |
| 84298 | 1.383520155  | -0.352108 | 3.119148782  | 6.824070034  | 5.605887822  | 6.214978928  |
| 84299 | 5.657493881  | 4.8900866 | 6.424901157  | 5.584676343  | 6.01100587   | 5.158346816  |
| 84300 | 5.980334028  | 8.5047567 | 3.455911335  | 6.250828564  | 4.216306283  | 5.233567424  |
| 84304 | 6.977258204  | 5.7271151 | 8.227401282  | -0.352108471 | -0.352108471 | -0.352108471 |
| 84310 | 6.766594494  | 7.1121207 | 7.457646996  | 6.35674501   | 4.970729633  | 5.663737322  |
| 84312 | -0.352108471 | -0.352108 | -0.352108471 | 6.505960865  | 5.246204134  | 7.765717596  |
| 84316 | 3.127737875  | 1.3772614 | 4.878214363  | 6.386836766  | 5.021833744  | 5.704335255  |
| 84317 | -0.352108471 | -0.352108 | -0.352108471 | 10.04224865  | -0.007975782 | 5.017136436  |
| 84320 | -0.352108471 | -0.352108 | -0.352108471 | 7.005019726  | 6.77374078   | 6.542461834  |
| 84324 | 5.90029238   | 5.9519035 | 5.848681221  | -0.352108471 | -0.352108471 | -0.352108471 |
| 84326 | -0.352108471 | -0.352108 | -0.352108471 | 5.946488185  | 6.74406273   | 6.345275458  |
| 84327 | -0.352108471 | -0.352108 | -0.352108471 | 5.923493182  | 5.926961306  | 5.920025058  |
| 84328 | 5.701758731  | 6.2048047 | 5.198712737  | 5.32911612   | 3.840699343  | 6.817532897  |
| 84330 | -0.352108471 | -0.352108 | -0.352108471 | 4.80208491   | 4.843308497  | 4.760861323  |
| 84331 | 6.481523945  | 6.3927328 | 6.570315073  | -0.352108471 | -0.352108471 | -0.352108471 |
| 84332 | 5.456407505  | 5.3835036 | 5.529311366  | -0.352108471 | -0.352108471 | -0.352108471 |
| 84334 | 3.519697412  | 5.2527512 | 4.386224296  | 5.265354555  | 4.209750764  | 4.73755266   |
| 84335 | 5.979176954  | 8.168924  | 10.35867098  | 6.963991695  | 6.224682193  | 7.703301197  |
| 84336 | 5.718612439  | 5.6251608 | 5.531709103  | -0.352108471 | -0.352108471 | -0.352108471 |
| 84337 | 7.442524773  | 7.4425248 | 7.442524773  | 7.528959936  | 7.55064888   | 7.507270991  |
| 84340 | 6.40229251   | 5.2006733 | 5.801482926  | 8.959547949  | 4.58793361   | 6.77374078   |
| 84343 | 7.857598295  | 4.8807149 | 6.369156591  | -0.352108471 | -0.352108471 | -0.352108471 |

|       |              |           |              |              |              |              |
|-------|--------------|-----------|--------------|--------------|--------------|--------------|
| 84364 | 5.90029238   | 6.8032541 | 4.99733063   | 6.44739251   | 7.077316842  | 6.762354676  |
| 84365 | 6.212536209  | 6.1916703 | 6.233402072  | -0.352108471 | -0.352108471 | -0.352108471 |
| 84376 | 8.502900368  | 8.4166969 | 8.589103829  | 7.607035011  | 7.615258575  | 7.598811448  |
| 84418 | 6.288510867  | 6.3152311 | 6.261790604  | -0.352108471 | -0.352108471 | -0.352108471 |
| 84436 | 5.8993644    | 5.4394504 | 5.669407383  | 1.727216326  | 2.506545095  | 0.947887556  |
| 84440 | 6.419814424  | 4.9346649 | 5.677239679  | 4.927679215  | 6.145324408  | 3.710034022  |
| 84444 | 6.207810414  | 5.7743703 | 5.340930224  | 5.575983727  | 3.966551194  | 7.185416259  |
| 84445 | 3.797822384  | 3.6761388 | 3.919505936  | 7.905601839  | 7.935107432  | 7.876096247  |
| 84446 | -0.352108471 | -0.352108 | -0.352108471 | 5.621162875  | 4.780619904  | 5.20089139   |
| 84447 | -0.352108471 | -0.352108 | -0.352108471 | 2.469725738  | 2.686833264  | 2.252618212  |
| 84449 | 5.0319334    | 4.7105331 | 4.871233248  | 2.94739082   | 3.594997091  | 4.242603362  |
| 84450 | -0.352108471 | -0.352108 | -0.352108471 | 0.849500091  | 2.051108653  | -0.352108471 |
| 84451 | -0.352108471 | -0.352108 | -0.352108471 | 4.499096633  | 6.740136862  | 5.619616747  |
| 84464 | 3.87704012   | 7.2156943 | 5.546367231  | 1.227667732  | 1.646479888  | 0.808855576  |
| 84466 | 1.608183739  | 3.5690192 | 2.588601447  | -0.352108471 | -0.352108471 | -0.352108471 |
| 84498 | 2.800331696  | 5.6251608 | 8.449989847  | 6.32531018   | 4.554082567  | 8.096537794  |
| 84501 | 3.921862223  | 4.5373358 | 5.152809293  | 1.043426334  | 0.440372779  | 1.646479888  |
| 84503 | 7.4871992    | 7.6430046 | 7.331393785  | 6.132384991  | 6.417266267  | 6.274825629  |
| 84504 | 5.117115863  | 5.1799508 | 5.054280952  | -0.352108471 | -0.352108471 | -0.352108471 |
| 84516 | 5.253175981  | 8.9292149 | 7.091195445  | 10.18367458  | 4.832419964  | 7.508047272  |
| 84520 | -0.352108471 | -0.352108 | -0.352108471 | 5.789762726  | 5.85807738   | 5.721448072  |
| 84522 | -0.352108471 | -0.352108 | -0.352108471 | 4.66005769   | 1.120964058  | 8.199151321  |
| 84530 | 5.159434386  | 4.2452143 | 6.073654487  | 5.584676343  | 5.605609608  | 5.563743079  |
| 84532 | 5.657493881  | 6.1596782 | 5.155309599  | -0.352108471 | -0.352108471 | -0.352108471 |
| 84542 | 5.920533403  | 6.6647303 | 7.408927118  | 3.685639275  | 5.494417177  | 1.876861374  |
| 84548 | 4.377360553  | 8.4511557 | 6.414258136  | -0.352108471 | -0.352108471 | -0.352108471 |
| 84552 | 6.550959389  | 9.3230193 | 7.936989338  | 2.310899623  | 3.677812865  | 5.044726108  |
| 84557 | 6.429770168  | 6.7181678 | 6.573968999  | 9.293231508  | 3.799598355  | 6.546414932  |
| 84561 | 5.852491963  | 7.9876068 | 3.717377078  | 5.889175989  | 7.091429582  | 6.490302786  |
| 84570 | -0.352108471 | -0.352108 | -0.352108471 | 6.693937107  | 7.657204881  | 5.730669333  |
| 84572 | 6.212536209  | 6.2312245 | 6.193847962  | 7.04681923   | 7.065023967  | 7.028614492  |
| 84612 | 6.486915185  | 6.8399467 | 6.133883699  | 5.786662435  | 5.659615047  | 5.913709822  |
| 84617 | 7.150225809  | 7.8972681 | 8.644310295  | 10.18469383  | 8.577244196  | 9.380969011  |
| 84618 | 2.413921152  | 5.1799508 | -0.352108471 | -0.352108471 | -0.352108471 | -0.352108471 |
| 84619 | 2.553073296  | -0.352108 | 5.458255064  | -0.352108471 | -0.352108471 | -0.352108471 |
| 84620 | 5.275595562  | 6.6012704 | 5.938433002  | 3.087716148  | 0.907438756  | 1.997577452  |
| 84622 | 3.498170515  | 8.7460628 | 6.122116649  | 0.440372779  | 0.440372779  | 0.440372779  |
| 84627 | 8.641706723  | 4.2856431 | 6.463674915  | 1.72593607   | 3.585121301  | 5.444306532  |
| 84629 | 5.749402114  | 5.1828024 | 6.31600185   | 6.449861915  | 5.678587805  | 7.221136025  |
| 84634 | -0.352108471 | -0.352108 | -0.352108471 | 2.38621749   | 5.124543452  | -0.352108471 |
| 84640 | 6.008766053  | 4.5503078 | 3.091849551  | 5.958359385  | 6.079118266  | 5.837600503  |
| 84641 | 6.073207852  | 4.1991649 | 7.94725076   | 5.789762726  | 6.239358644  | 5.340166808  |
| 84645 | 6.152796703  | 4.417152  | 5.284974356  | -0.352108471 | -0.352108471 | -0.352108471 |
| 84650 | -0.352108471 | -0.352108 | -0.352108471 | 6.872566731  | 4.6775697    | 5.775068216  |
| 84656 | 8.280933203  | 6.3831515 | 4.485369789  | 8.88055728   | 7.572831864  | 6.265106447  |
| 84661 | -0.352108471 | -0.352108 | -0.352108471 | 1.959896095  | 5.078758622  | 3.519327359  |
| 84665 | 6.121528769  | 7.564269  | 4.678788501  | 2.732252495  | 3.919505936  | 5.106759376  |



|       |              |           |              |              |              |              |
|-------|--------------|-----------|--------------|--------------|--------------|--------------|
| 84671 | 4.836101998  | 4.617923  | 5.054280952  | 1.518484901  | 1.731739118  | 1.305230684  |
| 84674 | 6.969212549  | 6.1166741 | 7.821750959  | 6.914644543  | 5.066468176  | 8.762820909  |
| 84678 | -0.352108471 | -0.352108 | -0.352108471 | 5.83433693   | 2.658540408  | 9.010133452  |
| 84681 | 3.445523539  | 2.7115616 | 1.977599573  | -0.352108471 | -0.352108471 | -0.352108471 |
| 84687 | 4.107001209  | 5.1522471 | 6.197493017  | 6.000652426  | 5.095423988  | 4.19019555   |
| 84693 | -0.352108471 | -0.352108 | -0.352108471 | 6.434644758  | 6.400751804  | 6.468537712  |
| 84705 | 5.797886585  | 5.9078411 | 5.852863847  | 6.136795257  | 7.068811929  | 5.204778586  |
| 84709 | -0.352108471 | -0.352108 | -0.352108471 | 6.663856474  | 6.689878453  | 6.637834496  |
| 84717 | -0.352108471 | -0.352108 | -0.352108471 | 6.862268088  | 5.950299088  | 6.406283588  |
| 84719 | 4.155596192  | 6.8142431 | 5.484919652  | 2.168105043  | 2.225020927  | 2.111189159  |
| 84722 | 6.625218558  | 5.8529375 | 5.080656365  | 0.044132154  | 0.440372779  | -0.352108471 |
| 84726 | 8.028411128  | 7.4061827 | 8.650639552  | 6.078995398  | 6.235921161  | 6.392846924  |
| 84734 | -0.352108471 | -0.352108 | -0.352108471 | 5.529311366  | 5.529311366  | 5.529311366  |
| 84747 | 7.595762813  | 5.3546856 | 3.113608485  | 5.409208735  | 5.579625618  | 5.494417177  |
| 84752 | -0.352108471 | -0.352108 | -0.352108471 | 7.097456946  | 6.096058685  | 6.596757815  |
| 84759 | -0.352108471 | -0.352108 | -0.352108471 | 4.279364163  | 5.095423988  | 5.911483813  |
| 84765 | 5.089412202  | 5.1245435 | 5.054280952  | -0.352108471 | -0.352108471 | -0.352108471 |
| 84766 | 5.688622647  | 5.7155573 | 5.661687951  | 0.897715333  | -0.352108471 | 2.147539136  |
| 84767 | 5.284974356  | 5.3152588 | 5.254689875  | 2.760618758  | 5.873345987  | -0.352108471 |
| 84769 | -0.352108471 | -0.352108 | -0.352108471 | 8.487081553  | 5.077006571  | 6.782044062  |
| 84771 | 7.728287468  | 6.2336451 | 6.980966299  | 7.261244111  | 1.415050014  | 4.338147062  |
| 84777 | 8.848406619  | 7.9088982 | 8.378652411  | 6.796814879  | 8.554830984  | 5.038798775  |
| 84787 | -0.352108471 | -0.352108 | -0.352108471 | 4.80208491   | 5.364539421  | 4.239630399  |
| 84790 | 8.83022732   | 8.077371  | 8.453799139  | 9.572867736  | 9.267430767  | 8.961993798  |
| 84793 | -0.352108471 | -0.352108 | -0.352108471 | 4.544323499  | 7.988410888  | 6.266367194  |
| 84798 | 5.855905479  | 7.2185983 | 6.537251893  | -0.352108471 | -0.352108471 | -0.352108471 |
| 84803 | 6.567831173  | 7.6323898 | 8.696948446  | 6.015503565  | 4.602173492  | 7.428833637  |
| 84807 | 7.008755637  | 5.4828969 | 6.245826291  | 5.184847066  | -0.804732305 | 2.19005738   |
| 84809 | -0.352108471 | -0.352108 | -0.352108471 | 4.21934628   | 2.065292044  | -0.088762191 |
| 84817 | -0.352108471 | -0.352108 | -0.352108471 | 4.841747932  | 6.56915909   | 8.296570247  |
| 84818 | -0.352108471 | -0.352108 | -0.352108471 | 6.396901492  | 6.369156591  | 6.341411689  |
| 84833 | 3.427182756  | 6.2125362 | 8.997889661  | 1.223721097  | 1.305230684  | 1.14221151   |
| 84836 | -0.352108471 | -0.352108 | -0.352108471 | 7.753432823  | 5.663737322  | 3.57404182   |
| 84838 | -0.352108471 | -0.352108 | -0.352108471 | 2.686833264  | 2.686833264  | 2.686833264  |
| 84849 | 1.783698732  | 3.9195059 | -0.352108471 | 3.330812986  | 2.857244297  | 3.804381674  |
| 84851 | 5.068573035  | 4.0160458 | 2.963518507  | 1.79269925   | -0.341531925 | 3.926930425  |
| 84852 | 0.064641487  | 11.052894 | 5.55876787   | -0.352108471 | -0.352108471 | -0.352108471 |
| 84856 | 5.251244996  | 4.5553643 | 3.859483687  | 6.333721317  | 5.693160971  | 6.013441144  |
| 84864 | -0.352108471 | -0.352108 | -0.352108471 | 6.396868383  | 3.876720712  | 8.917016053  |
| 84865 | 8.264193649  | 9.9813489 | 9.12277128   | 6.827448783  | 8.071076431  | 7.449262607  |
| 84866 | -0.352108471 | -0.352108 | -0.352108471 | 5.886425029  | 7.649557788  | 4.12329227   |
| 84868 | 8.082609643  | 6.9667435 | 5.8508773    | 3.214328646  | 2.875005529  | 3.553651763  |
| 84872 | 1.392109249  | 3.136327  | -0.352108471 | 4.477947052  | 4.843308497  | 4.112585606  |
| 84875 | -0.352108471 | -0.352108 | -0.352108471 | 7.204683996  | 6.066900737  | 4.929117477  |
| 84876 | 4.434314669  | 4.3467833 | 4.521846024  | 6.840114058  | 7.988534477  | 5.691693639  |
| 84878 | -0.352108471 | -0.352108 | -0.352108471 | 7.928318258  | 5.668425445  | 3.408532632  |
| 84881 | -0.352108471 | -0.352108 | -0.352108471 | -1.603209609 | 2.124237496  | 5.851684601  |

|       |              |           |              |              |              |              |
|-------|--------------|-----------|--------------|--------------|--------------|--------------|
| 84883 | 2.065292044  | -0.352108 | 4.482692559  | 4.825459812  | 5.731413688  | 3.919505936  |
| 84885 | -0.352108471 | -0.352108 | -0.352108471 | 7.716899633  | 6.864244415  | 6.011589196  |
| 84889 | -0.352108471 | -0.352108 | -0.352108471 | 5.794915175  | 5.789762726  | 5.784610276  |
| 84893 | -0.352108471 | -0.352108 | -0.352108471 | 4.979855164  | 4.80208491   | 4.624314656  |
| 84896 | -0.352108471 | -0.352108 | -0.352108471 | 5.523784224  | 6.651504685  | 6.087644454  |
| 84897 | 1.917440458  | 4.8341019 | 7.750763417  | 5.881152222  | 4.242739248  | 7.519565196  |
| 84898 | 4.680663176  | 3.9685185 | 3.256373879  | 7.100847388  | 6.410056867  | 6.755452127  |
| 84901 | 5.189616664  | 7.4464787 | 2.932754661  | 5.862922053  | 3.983878847  | 7.741965259  |
| 84904 | 6.376628371  | 6.394396  | 6.385512177  | 8.779362233  | 4.153642176  | 6.466502204  |
| 84909 | 7.60927147   | 6.8585836 | 8.359959313  | 3.659315043  | 5.863200788  | 1.455429298  |
| 84912 | 7.898998598  | 5.987128  | 4.075257444  | 5.109168614  | 7.721093571  | 6.415131092  |
| 84913 | -0.352108471 | -0.352108 | -0.352108471 | 6.356430144  | 7.05414488   | 6.705287512  |
| 84914 | 6.210802504  | 6.0384535 | 6.383151496  | 5.293014658  | 5.825167992  | 4.760861323  |
| 84916 | 2.405615662  | 2.7005309 | 2.553073296  | 6.32345662   | 4.593053508  | 5.458255064  |
| 84918 | 6.425665899  | 4.5091748 | 5.467420327  | 8.312100266  | 7.021301473  | 5.73050268   |
| 84923 | -0.352108471 | -0.352108 | -0.352108471 | 6.766960947  | 6.28894386   | 7.244978034  |
| 84924 | 5.136690127  | 4.9934779 | 5.065084027  | 3.861329726  | 6.32951825   | 5.095423988  |
| 84926 | 6.625961662  | 6.5887933 | 6.607377459  | 7.468215014  | 6.247115888  | 8.689314139  |
| 84928 | 7.76921396   | 7.357799  | 7.563506482  | 6.306115104  | 6.935635899  | 5.676594309  |
| 84929 | 5.939192221  | 7.1358046 | 4.742579887  | -0.352108471 | -0.352108471 | -0.352108471 |
| 84932 | 6.173142889  | 6.2379707 | 6.108315099  | 2.742642846  | 0.710777182  | 4.77450851   |
| 84934 | -0.352108471 | -0.352108 | -0.352108471 | 6.962788071  | 5.035153547  | 5.998970809  |
| 84936 | 7.283024581  | 5.3546311 | 3.42623756   | -0.352108471 | -0.352108471 | -0.352108471 |
| 84937 | -0.352108471 | -0.352108 | -0.352108471 | 7.893658173  | 6.266367194  | 4.639076214  |
| 84938 | -0.352108471 | -0.352108 | -0.352108471 | 6.22028448   | 6.0395156    | 6.12990004   |
| 84939 | -0.352108471 | -0.352108 | -0.352108471 | 3.784849312  | 2.239730506  | 3.012289909  |
| 84941 | 3.683980801  | 2.8783494 | 4.48961218   | 2.212158027  | 2.389615384  | 2.03470067   |
| 84945 | 5.721859655  | 6.5211979 | 6.121528769  | -0.352108471 | -0.352108471 | -0.352108471 |
| 84950 | -0.352108471 | -0.352108 | -0.352108471 | 6.147915031  | 5.893442277  | 6.402387785  |
| 84951 | 5.939192221  | 6.6110324 | 5.267352033  | 0.791292145  | 1.14221151   | 0.440372779  |
| 84952 | 7.214932646  | 5.629874  | 4.044815254  | 2.498005078  | 3.119148782  | 1.876861374  |
| 84955 | -0.352108471 | -0.352108 | -0.352108471 | 6.384445387  | 5.295953578  | 5.840199482  |
| 84959 | -0.352108471 | -0.352108 | -0.352108471 | 2.452355666  | 4.717886936  | 3.585121301  |
| 84961 | 9.897981083  | 9.5510341 | 9.204087168  | 9.937376152  | 6.218264246  | 8.077820199  |
| 84962 | 1.383520155  | -0.352108 | 3.119148782  | 7.521308925  | 7.55064888   | 7.49196897   |
| 84967 | 6.580916434  | 6.573969  | 6.567021565  | 3.884993804  | 7.834240934  | 5.859617369  |
| 84968 | -0.352108471 | -0.352108 | -0.352108471 | 4.559699198  | 6.369984184  | 2.749414213  |
| 84973 | 6.6890844    | 7.2173176 | 7.745550831  | 7.054707329  | 6.431979261  | 5.809251193  |
| 84975 | 5.467785857  | 5.5587679 | 5.649749884  | 1.90830372   | 1.939746065  | 1.876861374  |
| 84981 | 7.630589424  | 8.1981511 | 7.063027705  | 5.169157826  | 6.821277412  | 3.517038239  |
| 84984 | 5.314182891  | 4.8686712 | 5.759694547  | 5.769936357  | 6.276815009  | 6.783693662  |
| 84991 | 5.155398661  | 6.7545585 | 8.353718391  | 3.665466294  | 3.669796527  | 3.674126761  |
| 84993 | 1.383520155  | -0.352108 | 3.119148782  | 6.596757815  | 7.586527141  | 5.60698849   |
| 84996 | 5.958359385  | 5.9583594 | 5.958359385  | 2.469725738  | 2.252618212  | 2.686833264  |
| 85002 | 5.468477282  | 6.2738323 | 7.079187236  | -0.352108471 | -0.352108471 | -0.352108471 |
| 85012 | 2.065292044  | -0.352108 | 4.482692559  | 7.39796665   | 7.592535142  | 7.787103634  |
| 85014 | -0.352108471 | -0.352108 | -0.352108471 | 6.111624209  | 2.945013769  | 9.27823465   |

|       |              |           |              |              |              |              |
|-------|--------------|-----------|--------------|--------------|--------------|--------------|
| 85016 | 5.272198236  | 3.3589528 | 4.315575532  | 3.365217942  | 2.607687719  | 4.122748165  |
| 85021 | 8.099635869  | 7.7641727 | 8.435099048  | 4.198376291  | 6.51496239   | 8.83154849   |
| 85026 | 5.625160771  | 4.8962877 | 6.354033885  | 0.440372779  | 0.440372779  | 0.440372779  |
| 85027 | 6.765298135  | 7.0115295 | 6.888413829  | -0.352108471 | -0.352108471 | -0.352108471 |
| 85300 | 9.493130187  | 8.9153355 | 8.33754074   | 7.645974262  | 8.127485912  | 7.164462612  |
| 85301 | 6.832572932  | 7.4650603 | 6.200085577  | 0.228373553  | 0.808855576  | -0.352108471 |
| 85302 | -0.352108471 | -0.352108 | -0.352108471 | 3.453806753  | 0.970079685  | 2.211943219  |
| 85315 | 2.38621749   | 5.1245435 | -0.352108471 | 0.289051906  | -0.352108471 | 0.930212283  |
| 85320 | -0.352108471 | -0.352108 | -0.352108471 | 2.168105043  | 4.688318557  | -0.352108471 |
| 85359 | 4.778799825  | 3.136327  | 6.421272681  | 6.621168045  | 6.653870824  | 6.588465267  |
| 85360 | 6.273832259  | 6.2858739 | 6.261790604  | 7.8752966    | 7.886559523  | 7.864033677  |
| 85364 | -0.352108471 | -0.352108 | -0.352108471 | 4.579410823  | 6.897845428  | 5.738628126  |
| 85365 | 5.402265996  | 6.4636749 | 7.525083834  | -0.352108471 | -0.352108471 | -0.352108471 |
| 85366 | 6.676242611  | 9.1722276 | 7.924235121  | 1.854057389  | 9.996704403  | 5.925380896  |
| 85371 | 7.343076225  | 6.6904766 | 7.016776417  | 5.643490857  | 5.27122146   | 4.898952063  |
| 85376 | 8.161766964  | 3.201689  | 5.681727979  | 3.428141285  | 4.782566466  | 2.073716103  |
| 85377 | 6.787134073  | 5.0416624 | 8.53260573   | -0.352108471 | -0.352108471 | -0.352108471 |
| 85378 | 4.825897128  | 5.6090851 | 5.217491139  | 4.648370104  | -0.517786016 | 2.065292044  |
| 85379 | 1.383520155  | -0.352108 | 3.119148782  | 1.167362396  | -0.352108471 | 2.686833264  |
| 85397 | -0.352108471 | -0.352108 | -0.352108471 | 4.456886199  | 5.342972175  | 3.570800224  |
| 85406 | 1.999010143  | 1.6620152 | 1.325020218  | 1.717718408  | 1.179374859  | 2.256061956  |
| 85407 | 6.261203695  | 7.1052531 | 5.41715427   | 6.288357381  | 7.012139391  | 5.564575371  |
| 85415 | 3.120551286  | 4.2090916 | 2.032011016  | 4.456886199  | 3.752331459  | 5.16144094   |
| 85437 | -0.352108471 | -0.352108 | -0.352108471 | 6.678528048  | 9.509173508  | 3.847882587  |
| 85440 | 5.493783215  | 5.3450549 | 5.642511495  | 6.585987027  | 7.612525434  | 5.559448621  |
| 85441 | 6.28161222   | 5.2500678 | 7.31315665   | 3.853086798  | 3.510198867  | 3.167310937  |
| 85442 | 5.718459767  | 7.871617  | 3.565302584  | -0.352108471 | -0.352108471 | -0.352108471 |
| 85443 | -0.352108471 | -0.352108 | -0.352108471 | 5.872806176  | 6.567671021  | 6.220238598  |
| 85444 | -0.352108471 | -0.352108 | -0.352108471 | 2.571154353  | 3.68200639   | 1.460302315  |
| 85450 | 6.572304858  | 7.461248  | 7.016776417  | -0.352108471 | -0.352108471 | -0.352108471 |
| 85456 | 6.257046343  | 7.1297248 | 5.384367915  | -0.352108471 | -0.352108471 | -0.352108471 |
| 85457 | 6.20889986   | 6.4517249 | 6.694549978  | 7.620346447  | 5.377523302  | 6.498934874  |
| 85459 | 6.089299524  | 5.8001998 | 5.511100051  | -0.352108471 | -0.352108471 | -0.352108471 |
| 85460 | -0.352108471 | -0.352108 | -0.352108471 | 2.902991023  | 2.686833264  | 3.119148782  |
| 85461 | 5.052267685  | 4.8285765 | 5.275958864  | -0.352108471 | -0.352108471 | -0.352108471 |
| 85463 | 6.27004087   | 5.5913056 | 4.912570307  | -0.352108471 | -0.352108471 | -0.352108471 |
| 85465 | 4.697886322  | 5.2532408 | 5.808595262  | 5.821410838  | 3.292015634  | 8.350806041  |
| 85476 | -0.352108471 | -0.352108 | -0.352108471 | 6.204656258  | 2.874668701  | 9.534643815  |
| 85477 | 1.383520155  | -0.352108 | 3.119148782  | 1.90830372   | 1.939746065  | 1.876861374  |
| 85478 | -0.352108471 | -0.352108 | -0.352108471 | 5.704335255  | 2.888348999  | 8.520321511  |
| 85509 | -0.352108471 | -0.352108 | -0.352108471 | 5.859617369  | 5.671499241  | 6.047735497  |
| 85865 | 6.356780189  | 7.1058108 | 7.85484144   | 8.481056576  | 4.967882955  | 6.724469766  |
| 87178 | 10.66965894  | 7.3348011 | 9.002230017  | 8.40188526   | 7.347690401  | 6.293495543  |
| 88455 | 7.185765998  | 7.2040879 | 7.167444067  | 6.77374078   | 6.788420481  | 6.759061079  |
| 88745 | -0.352108471 | -0.352108 | -0.352108471 | 6.792568998  | 6.121096218  | 5.449623439  |
| 89122 | 8.252623863  | 6.2725067 | 4.292389578  | 8.029451742  | 6.391703033  | 4.753954324  |
| 89777 | 4.178899946  | 4.1125856 | 4.245214285  | 6.266367194  | 6.276856601  | 6.255877787  |

|       |              |           |              |              |              |              |
|-------|--------------|-----------|--------------|--------------|--------------|--------------|
| 89782 | 7.633665131  | 1.8027719 | 4.718218516  | 2.697772388  | 4.66005769   | 6.622342991  |
| 89790 | 7.02788799   | 6.9268019 | 7.128974067  | 3.055408374  | 3.919505936  | 2.191310813  |
| 89795 | -0.352108471 | -0.352108 | -0.352108471 | 6.822208827  | 4.590523374  | 9.053894279  |
| 89796 | 5.656532109  | 6.4786045 | 6.067568295  | 7.288053042  | 5.882959551  | 8.693146532  |
| 89846 | 6.474775011  | 5.7103767 | 4.9459783    | -0.352108471 | -0.352108471 | -0.352108471 |
| 89857 | 4.893310105  | 3.737841  | 4.315575532  | 5.457998494  | 8.810281472  | 2.105715516  |
| 89858 | 6.69160764   | 5.0522677 | 3.412927731  | -0.352108471 | -0.352108471 | -0.352108471 |
| 89866 | -0.352108471 | -0.352108 | -0.352108471 | 6.32531018   | 6.33538923   | 6.31523113   |
| 89872 | -0.352108471 | -0.352108 | -0.352108471 | 1.41945414   | 2.049256654  | 2.679059168  |
| 89883 | 3.613387334  | 4.5373358 | 5.461284182  | -0.352108471 | -0.352108471 | -0.352108471 |
| 89890 | 7.692324422  | 8.3191935 | 7.065455358  | 6.377487473  | 6.178989656  | 6.278238565  |
| 89891 | 7.441788381  | 6.7667812 | 8.116795577  | 5.869665514  | 6.129228791  | 5.610102238  |
| 89910 | -0.352108471 | -0.352108 | -0.352108471 | 6.165870606  | 7.342381689  | 4.989359523  |
| 89932 | 5.553615219  | 7.8347761 | 6.694195663  | 6.092908426  | 6.538483369  | 5.647333483  |
| 89941 | 8.101656291  | 7.9601021 | 7.818547982  | 5.723310862  | 6.908528552  | 8.093746242  |
| 89970 | 5.833726066  | 5.980334  | 6.12694199   | -0.352108471 | -0.352108471 | -0.352108471 |
| 90007 | 7.584087926  | 5.2285043 | 9.939671503  | 5.10873923   | 8.078948179  | 6.593843704  |
| 90011 | 6.895865703  | 7.6906661 | 6.101065333  | 6.488107881  | 8.571202555  | 4.405013207  |
| 90025 | 1.11708714   | 1.7836987 | 2.450310324  | 6.40631083   | 5.376604349  | 7.436017311  |
| 90060 | 1.25047138   | 3.9685185 | 6.686565676  | 3.61631576   | 6.567007149  | 9.517698537  |
| 90102 | -0.352108471 | -0.352108 | -0.352108471 | 6.992253866  | 6.829307464  | 6.666361061  |
| 90135 | 8.802912536  | 6.4923205 | 7.64761654   | -0.352108471 | -0.352108471 | -0.352108471 |
| 90141 | 8.230464395  | 7.6536667 | 7.076869035  | 1.864658285  | 1.731739118  | 1.997577452  |
| 90203 | 4.033545615  | 6.6075809 | 5.320563245  | -0.352108471 | -0.352108471 | -0.352108471 |
| 90204 | 2.065292044  | -0.352108 | 4.482692559  | 4.580727159  | 7.889977403  | 6.235352281  |
| 90231 | 5.354957525  | 5.1522471 | 4.949536702  | 6.112587778  | 7.517115756  | 4.708059801  |
| 90233 | 6.461098925  | 3.2226986 | 4.841898744  | 1.29104505   | 5.607672285  | 3.449358668  |
| 90246 | -0.352108471 | -0.352108 | -0.352108471 | 4.08236011   | 1.271461797  | 6.893258424  |
| 90249 | -0.352108471 | -0.352108 | -0.352108471 | 5.430898714  | 5.458255064  | 5.403542364  |
| 90313 | 3.515141236  | 3.8300956 | 3.200186845  | 7.334242202  | 7.40032982   | 7.466417438  |
| 90317 | -0.352108471 | -0.352108 | -0.352108471 | 5.295215654  | 5.017136436  | 4.739057218  |
| 90321 | 5.372783739  | 4.671913  | 6.073654487  | 2.278504072  | 1.437859363  | 3.119148782  |
| 90324 | 4.178899946  | 4.5809407 | 3.776859191  | 5.324738906  | 8.151770667  | 2.497707144  |
| 90333 | 6.846957097  | 4.7216163 | 8.972297904  | 1.475082136  | 1.807952763  | 1.14221151   |
| 90338 | 5.780731917  | 7.2363344 | 6.508533137  | 6.993768266  | 5.20089139   | 3.408014513  |
| 90355 | 5.291901397  | 6.4139735 | 5.852937462  | 5.929817327  | 5.736862343  | 6.122772311  |
| 90379 | 6.623540933  | 9.5099351 | 3.73714675   | 5.584676343  | 4.47453227   | 6.694820416  |
| 90390 | 6.378273034  | 6.626253  | 6.502263028  | -0.352108471 | -0.352108471 | -0.352108471 |
| 90407 | 6.333717463  | 5.9384179 | 6.729016984  | 2.541584564  | 3.22141505   | 2.881499807  |
| 90410 | 5.659278871  | 5.9376626 | 5.380895166  | -0.352108471 | -0.352108471 | -0.352108471 |
| 90411 | 7.192639764  | 10.261353 | 13.33006694  | 9.476682029  | 8.254104243  | 8.865393136  |
| 90416 | 2.186071746  | 4.1125856 | 6.039099466  | 7.761136634  | 6.022050925  | 4.282965216  |
| 90417 | 5.55876787   | 5.5882244 | 5.529311366  | -0.352108471 | -0.352108471 | -0.352108471 |
| 90441 | 4.153967827  | 3.6761388 | 4.631796822  | 7.172442894  | 7.300708227  | 7.044177561  |
| 90480 | 7.224081961  | 8.0130371 | 6.435126823  | 5.13265557   | 6.5583441    | 5.845499835  |
| 90485 | 6.746204904  | 6.1811449 | 6.463674915  | 2.947798352  | 5.636809111  | 8.32581987   |
| 90499 | 3.435007638  | 4.0251747 | 4.61534179   | 4.743879823  | 3.818098858  | 2.892317893  |

|       |              |           |              |              |              |              |
|-------|--------------|-----------|--------------|--------------|--------------|--------------|
| 90507 | 6.396868383  | 9.0588658 | 3.734870943  | 4.930505787  | 5.174029583  | 5.052267685  |
| 90523 | 5.017136436  | 6.274379  | 3.759893835  | -0.352108471 | -0.352108471 | -0.352108471 |
| 90525 | -0.352108471 | -0.352108 | -0.352108471 | 5.494417177  | 3.90268819   | 7.086146163  |
| 90550 | 5.796951735  | 6.996785  | 6.396868383  | -0.352108471 | -0.352108471 | -0.352108471 |
| 90624 | 8.979045907  | 9.6703846 | 8.287707201  | 9.13784247   | 7.758758575  | 6.379674679  |
| 90627 | -0.352108471 | -0.352108 | -0.352108471 | 5.748575889  | 6.691901308  | 6.220238598  |
| 90632 | 5.463922025  | 5.5293114 | 5.398532684  | -0.352108471 | -0.352108471 | -0.352108471 |
| 90637 | 5.284974356  | 5.9833132 | 4.586635527  | -0.352108471 | -0.352108471 | -0.352108471 |
| 90649 | 6.46696622   | 5.719565  | 4.972163768  | 3.627756523  | 4.683557056  | 2.571955991  |
| 90668 | 2.741135556  | 2.8779269 | 3.014718167  | -0.352108471 | -0.352108471 | -0.352108471 |
| 90701 | -0.352108471 | -0.352108 | -0.352108471 | 6.204656258  | 5.275547027  | 7.133765489  |
| 90780 | 5.828848464  | 5.825168  | 5.832528937  | -0.352108471 | -0.352108471 | -0.352108471 |
| 90784 | 4.225476119  | 3.5632483 | 3.894362219  | 1.87051746   | 2.191310813  | 1.549724107  |
| 90799 | 8.128107665  | 6.2398609 | 4.351614212  | -0.352108471 | -0.352108471 | -0.352108471 |
| 90806 | 5.895195597  | 6.3988044 | 6.147000016  | 4.274943274  | 9.771120937  | 7.023032106  |
| 90809 | 1.188791836  | 4.1125856 | 7.036379376  | 6.497182024  | 6.211082415  | 6.783281634  |
| 90826 | 3.452766383  | 6.3045646 | 4.878665478  | -0.352108471 | -0.352108471 | -0.352108471 |
| 90827 | -0.352108471 | -0.352108 | -0.352108471 | 6.011060592  | 5.233567424  | 4.456074255  |
| 90850 | 2.980157593  | 5.4937832 | 8.007408837  | 5.88700099   | 6.036990268  | 5.737011711  |
| 90853 | 7.800060623  | 7.8275848 | 7.772536433  | 7.649062677  | 7.682866779  | 7.615258575  |
| 90861 | 8.477997976  | 5.2404366 | 6.859217306  | -0.352108471 | -0.352108471 | -0.352108471 |
| 90864 | 6.590508304  | 5.4137442 | 7.767272436  | -0.352108471 | -0.352108471 | -0.352108471 |
| 90871 | -0.352108471 | -0.352108 | -0.352108471 | 5.406707798  | 5.371019024  | 5.442396573  |
| 90933 | -0.352108471 | -0.352108 | -0.352108471 | 1.492819042  | 3.337746555  | -0.352108471 |
| 90957 | 7.016776417  | 3.3851838 | 10.648369    | 7.737544924  | 6.739878825  | 5.742212726  |
| 90993 | 6.610895082  | 6.7871341 | 6.963373064  | 4.058714557  | 7.021818365  | 9.984922174  |
| 91010 | 5.199889546  | 6.4333187 | 7.666747909  | 3.585121301  | 5.152763901  | 2.017478701  |
| 91012 | 6.851278433  | 8.0325481 | 5.670008745  | 0.538184292  | 3.299606409  | 1.918895351  |
| 91039 | 7.97794913   | 8.7396636 | 9.501378166  | 7.186741904  | 8.282993987  | 6.09048982   |
| 91056 | 6.803586453  | 7.3154815 | 6.291691359  | 5.343911315  | 5.926961306  | 4.760861323  |
| 91107 | -0.352108471 | -0.352108 | -0.352108471 | 5.575983727  | 5.588224375  | 5.563743079  |
| 91120 | 6.619197037  | 6.479333  | 6.759061079  | 1.937219413  | 1.997577452  | 1.876861374  |
| 91156 | -0.352108471 | -0.352108 | -0.352108471 | 6.196133489  | 7.653201227  | 4.739065751  |
| 91179 | 4.178899946  | 4.7699746 | 3.587825308  | 5.917668693  | 6.965316847  | 8.012965002  |
| 91252 | -0.352108471 | -0.352108 | -0.352108471 | 4.325505146  | 7.682451865  | 6.003978506  |
| 91289 | 6.342244821  | 9.3109461 | 7.826595454  | 6.545950789  | 8.401990643  | 4.689910934  |
| 91300 | 6.77374078   | 5.1922051 | 8.35527642   | -0.352108471 | -0.352108471 | -0.352108471 |
| 91304 | 7.483407675  | 10.5149   | 4.451915026  | 7.165804888  | 6.02456832   | 8.307041457  |
| 91316 | -0.352108471 | -0.352108 | -0.352108471 | 6.32531018   | 6.33538923   | 6.31523113   |
| 91369 | 5.71551863   | 6.466297  | 6.090907831  | 5.017136436  | 5.037481686  | 4.996791185  |
| 91373 | 5.016491534  | 5.3673546 | 5.718217754  | 5.930371471  | 6.904123208  | 6.41724734   |
| 91408 | 1.383520155  | -0.352108 | 3.119148782  | 6.63770735   | 7.818531425  | 5.456883274  |
| 91442 | 4.6888805    | 6.1729579 | 3.204803148  | -0.352108471 | -0.352108471 | -0.352108471 |
| 91445 | -0.352108471 | -0.352108 | -0.352108471 | 5.991735221  | 5.815785788  | 5.903760504  |
| 91450 | 7.12416845   | 6.573969  | 6.023769549  | -0.352108471 | -0.352108471 | -0.352108471 |
| 91452 | 6.760866103  | 6.2117907 | 5.66271525   | 1.689109503  | 1.646479888  | 1.731739118  |
| 91523 | 1.383520155  | 0.6261753 | 2.140864999  | 5.20596667   | 6.754701387  | 5.980334028  |

|       |              |           |              |              |              |              |
|-------|--------------|-----------|--------------|--------------|--------------|--------------|
| 91544 | -0.352108471 | -0.352108 | -0.352108471 | 4.456886199  | 4.482692559  | 4.43107984   |
| 91548 | 5.173810713  | 5.9562314 | 6.738652149  | 4.750963477  | 7.999596828  | 6.375280153  |
| 91574 | 9.719548766  | 8.1628634 | 6.606178131  | 7.74186346   | 4.71383197   | 6.227847715  |
| 91582 | 4.886952939  | 7.3607807 | 9.834608413  | 6.64213435   | 6.662724824  | 6.621543876  |
| 91612 | 6.007101566  | 4.4557793 | 2.904456987  | 4.294153815  | 6.5059697    | 5.400061757  |
| 91624 | 7.388668438  | 7.5719245 | 7.205412329  | -0.352108471 | -0.352108471 | -0.352108471 |
| 91647 | -0.352108471 | -0.352108 | -0.352108471 | 4.520286589  | 5.369332089  | 6.218377588  |
| 91653 | -0.352108471 | -0.352108 | -0.352108471 | 6.690172     | 5.08382998   | 5.88700099   |
| 91661 | 2.711561556  | -0.352108 | 5.775231583  | 0.044132154  | -0.352108471 | 0.440372779  |
| 91663 | 8.461775661  | 7.6512983 | 8.056536983  | 9.030316954  | 9.150258145  | 8.910375764  |
| 91683 | 5.308889672  | 6.6517784 | 5.980334028  | -0.352108471 | -0.352108471 | -0.352108471 |
| 91695 | 5.371621734  | 5.980334  | 6.589046323  | 4.20031331   | 6.369635403  | 5.284974356  |
| 91748 | 5.391018164  | 6.3199067 | 4.462129642  | 6.849541372  | 7.403503448  | 7.12652241   |
| 91749 | 8.471837241  | 6.9679349 | 9.975739554  | 6.736691293  | 6.173080407  | 6.45488585   |
| 91754 | 10.02239479  | 7.4969383 | 4.971481897  | 1.223721097  | 1.151458371  | 1.295983823  |
| 91775 | 7.274390182  | 2.4290792 | 4.851734675  | 4.313590712  | 4.904478682  | 5.495366652  |
| 91801 | -0.352108471 | -0.352108 | -0.352108471 | 4.845290992  | 5.118656602  | 5.392022211  |
| 91807 | 8.127417516  | 8.838326  | 7.416509     | 6.613210803  | 5.341903266  | 7.88451834   |
| 91862 | 4.682964349  | 4.9799919 | 4.385936778  | 1.530736894  | 2.252618212  | 0.808855576  |
| 91869 | -0.352108471 | -0.352108 | -0.352108471 | 5.537668162  | 5.745394463  | 5.953120764  |
| 91875 | -0.352108471 | -0.352108 | -0.352108471 | 3.136326969  | 3.119148782  | 3.153505157  |
| 91893 | 5.186138762  | 5.4582551 | 4.914022459  | 2.169424975  | 2.147539136  | 2.191310813  |
| 91942 | 8.707715234  | 5.6077    | 7.15770761   | 5.87051543   | 6.44086039   | 7.011205349  |
| 91948 | 8.300571608  | 9.010354  | 7.590789181  | 9.12907743   | 7.5316884    | 5.93429937   |
| 91949 | -0.352108471 | -0.352108 | -0.352108471 | 5.845499835  | 5.275594597  | 6.415405073  |
| 91977 | 3.527916452  | 3.136327  | 3.919505936  | 5.780944036  | 6.246629235  | 5.315258837  |
| 91978 | -0.352108471 | -0.352108 | -0.352108471 | 5.369332089  | 5.668264776  | 5.070399401  |
| 92002 | -0.352108471 | -0.352108 | -0.352108471 | 6.165870606  | 2.831255972  | 9.50048524   |
| 92014 | 8.202136007  | 7.6744054 | 8.729866607  | 5.639711591  | 6.536514975  | 7.433318358  |
| 92017 | -0.352108471 | -0.352108 | -0.352108471 | 5.233567424  | 8.165540744  | 2.301594103  |
| 92070 | 5.933346321  | 6.183964  | 6.43458171   | 1.475082136  | -0.196735912 | 3.146900185  |
| 92092 | 6.519673958  | 5.4398195 | 7.599528386  | 3.8208192    | 4.559699198  | 5.298579197  |
| 92126 | 9.27421614   | 7.3790032 | 5.483790181  | 6.715221125  | 8.277602281  | 9.839983437  |
| 92140 | 6.709007107  | 6.2595096 | 5.810012155  | 7.069785735  | 6.77205408   | 6.920919907  |
| 92154 | 6.440466489  | 6.3520539 | 6.263641238  | 7.999579836  | 7.690758392  | 7.381936948  |
| 92170 | -0.352108471 | -0.352108 | -0.352108471 | 5.886425029  | 6.284876226  | 5.487973831  |
| 92181 | -0.352108471 | -0.352108 | -0.352108471 | 6.514344938  | 4.178777881  | 8.849911996  |
| 92285 | 10.17983947  | 6.4686213 | 8.324230385  | 7.434456273  | 8.642858517  | 8.038657395  |
| 92291 | 6.991795048  | 8.3395212 | 5.644068901  | -0.352108471 | -0.352108471 | -0.352108471 |
| 92305 | -0.352108471 | -0.352108 | -0.352108471 | 5.233567424  | 5.254689875  | 5.212444972  |
| 92335 | -0.352108471 | -0.352108 | -0.352108471 | 5.919436356  | 5.723485516  | 5.527534675  |
| 92345 | 4.016045771  | 4.2589309 | 3.773160614  | 3.241701208  | 6.276856601  | 9.312011993  |
| 92400 | -0.352108471 | -0.352108 | -0.352108471 | 3.585121301  | 2.690317848  | 4.479924754  |
| 92421 | 4.439206069  | 5.1245435 | 5.809880834  | 3.768326697  | 1.939527756  | 0.110728816  |
| 92521 | -0.352108471 | -0.352108 | -0.352108471 | 7.076901479  | 7.088778992  | 7.065023967  |
| 92579 | 0.296841853  | 1.3835202 | 2.470198458  | 7.507600459  | 7.070555652  | 7.289078056  |
| 92609 | 10.80763819  | 8.2221038 | 5.636569487  | 7.391802441  | 7.227421543  | 7.063040645  |



|       |              |           |              |              |              |              |
|-------|--------------|-----------|--------------|--------------|--------------|--------------|
| 92610 | -0.352108471 | -0.352108 | -0.352108471 | 5.141739075  | 6.296043865  | 7.450348656  |
| 92659 | 0.486617086  | 1.6620152 | 2.837413275  | 6.682963902  | 5.64354012   | 4.604116337  |
| 92689 | 5.97774402   | 6.5502319 | 7.122719701  | 7.362089337  | 8.552040358  | 6.172138317  |
| 92691 | 5.110388728  | 5.3989618 | 5.687534962  | 0.762376451  | -0.352108471 | 1.876861374  |
| 92703 | -0.352108471 | -0.352108 | -0.352108471 | 6.001809131  | 5.930794706  | 6.072823557  |
| 92714 | 5.775231583  | 4.5960915 | 6.954371674  | -0.352108471 | -0.352108471 | -0.352108471 |
| 92715 | -0.352108471 | -0.352108 | -0.352108471 | 4.08236011   | 3.307512663  | 4.857207558  |
| 92737 | -0.352108471 | -0.352108 | -0.352108471 | 6.036056902  | 5.338134843  | 4.640212784  |
| 92797 | -0.352108471 | -0.352108 | -0.352108471 | 6.916603554  | 6.614053211  | 7.219153897  |
| 92799 | -0.352108471 | -0.352108 | -0.352108471 | 2.082455004  | 2.342793532  | 2.60313206   |
| 92806 | 5.740630976  | 6.0377833 | 5.889207138  | 1.05704313   | 1.305230684  | 0.808855576  |
| 92822 | 3.797822384  | 5.5406981 | 2.054946695  | 5.591305588  | 7.325226398  | 3.857384779  |
| 92856 | -0.352108471 | -0.352108 | -0.352108471 | 3.384482817  | 5.624431044  | 1.144534591  |
| 92912 | 6.643175906  | 5.5587679 | 4.474359834  | -0.352108471 | -0.352108471 | -0.352108471 |
| 93010 | 4.311279682  | 3.1277379 | 1.944196069  | 3.315115848  | 4.25511609   | 2.375115605  |
| 93100 | 6.020381091  | 7.6245748 | 4.416187361  | 5.766785892  | 7.75792346   | 6.762354676  |
| 93129 | 7.646733741  | 5.6886226 | 3.730511553  | 4.975647011  | 6.070832428  | 5.523239719  |
| 93164 | 7.031788726  | 7.6409192 | 8.250049657  | 3.364509603  | 6.158865923  | 8.953222244  |
| 93183 | 6.348298929  | 7.1458688 | 7.943438692  | 1.434979174  | 1.939746065  | 0.930212283  |
| 93323 | 5.664172181  | 6.0736545 | 5.254689875  | 7.076901479  | 7.088778992  | 7.065023967  |
| 93377 | -0.352108471 | -0.352108 | -0.352108471 | 6.579427792  | 3.375993044  | 4.977710418  |
| 93380 | -0.352108471 | -0.352108 | -0.352108471 | 2.211943219  | 3.078892472  | 1.344993966  |
| 93436 | -0.352108471 | -0.352108 | -0.352108471 | 4.500730297  | 4.66005769   | 4.819385082  |
| 93487 | 8.779482436  | 7.4075938 | 6.035705229  | 8.093256519  | 6.420771494  | 9.765741543  |
| 93556 | 5.551643179  | 7.253083  | 6.402363066  | 6.837727763  | 5.860408356  | 6.34906806   |
| 93611 | 4.697621232  | 6.3213699 | 5.509495557  | 2.689753515  | 8.128679439  | 5.409216477  |
| 93621 | 7.5721129    | 6.9546757 | 6.33723851   | 8.825012889  | 7.767667959  | 6.71032303   |
| 93624 | 7.735408894  | 7.6152586 | 7.855559213  | 5.10819936   | 5.315258837  | 4.901139884  |
| 93627 | -0.352108471 | -0.352108 | -0.352108471 | 3.446982306  | 4.954218546  | 1.939746065  |
| 93649 | 6.573968999  | 6.5884653 | 6.559472732  | 6.739878825  | 6.759061079  | 6.720696571  |
| 93663 | -0.352108471 | -0.352108 | -0.352108471 | 3.313060576  | 4.851659645  | 4.08236011   |
| 93664 | 2.62245663   | -0.352108 | 5.597021732  | -0.352108471 | -0.352108471 | -0.352108471 |
| 93974 | 5.82803966   | 6.7777281 | 6.302883855  | 8.154471537  | 7.596099384  | 7.037727232  |
| 93986 | 1.392109249  | 1.612067  | 1.172151524  | 3.885702903  | 0.163658162  | 2.024680532  |
| 94015 | 6.829912859  | 5.9638239 | 6.396868383  | -0.352108471 | -0.352108471 | -0.352108471 |
| 94025 | 5.946049998  | 7.0319237 | 8.117797456  | -0.352108471 | -0.352108471 | -0.352108471 |
| 94027 | 7.099953796  | 5.2359798 | 6.167966808  | -0.352108471 | -0.352108471 | -0.352108471 |
| 94056 | 5.987162856  | 6.003228  | 6.019293182  | 6.71873029   | 6.776545416  | 6.747637853  |
| 94059 | 5.661692129  | 7.1320446 | 6.396868383  | -0.352108471 | -0.352108471 | -0.352108471 |
| 94081 | 5.256268008  | 4.596919  | 5.915617032  | 7.889303643  | 6.900899666  | 5.912495689  |
| 94101 | 5.217491139  | 4.3654974 | 6.069484887  | -0.352108471 | -0.352108471 | -0.352108471 |
| 94104 | -0.352108471 | -0.352108 | -0.352108471 | 6.087644454  | 6.101634422  | 6.073654487  |
| 94134 | -0.352108471 | -0.352108 | -0.352108471 | 1.995427359  | 2.051108653  | 1.939746065  |
| 94137 | 5.493783215  | 3.0404874 | 7.947078997  | -0.352108471 | -0.352108471 | -0.352108471 |
| 94160 | 5.179868644  | 4.7110274 | 5.648709911  | -0.352108471 | -0.352108471 | -0.352108471 |
| 94234 | 6.239539073  | 5.2849744 | 4.330409639  | -0.352108471 | -0.352108471 | -0.352108471 |
| 94239 | -0.352108471 | -0.352108 | -0.352108471 | 7.843946541  | 6.775428903  | 8.912464178  |

|        |              |           |              |              |              |              |
|--------|--------------|-----------|--------------|--------------|--------------|--------------|
| 94241  | -0.352108471 | -0.352108 | -0.352108471 | 4.152826211  | 6.56915909   | 8.985491968  |
| 95681  | 6.735779686  | 6.3194103 | 7.152149096  | -0.352108471 | -0.352108471 | -0.352108471 |
| 96459  | 3.465763751  | 5.5302552 | 7.594746726  | 6.488549187  | 5.912903045  | 6.200726116  |
| 96626  | 4.016045771  | 1.971735  | 6.060356584  | 1.270654317  | 0.440372779  | 2.100935855  |
| 103910 | 9.617685135  | 9.8077655 | 9.427604818  | 9.312977242  | 8.209606328  | 8.761291785  |
| 112401 | -0.352108471 | -0.352108 | -0.352108471 | 5.688622647  | 4.362095569  | 7.015149725  |
| 112464 | 7.185765998  | 4.7531756 | 9.618356393  | 6.876579765  | 7.078465349  | 6.674694182  |
| 112483 | -0.352108471 | -0.352108 | -0.352108471 | 7.586354189  | 6.99529589   | 6.404237591  |
| 112487 | 9.249420068  | 8.0667995 | 6.88417892   | 5.420879354  | 2.673938688  | 8.167820021  |
| 112495 | 5.919459543  | 5.9583594 | 5.880559702  | 5.233567424  | 5.254689875  | 5.212444972  |
| 112597 | 7.707647354  | 9.3545475 | 8.531097423  | 7.288722029  | 6.99593518   | 6.703148332  |
| 112611 | -0.352108471 | -0.352108 | -0.352108471 | 4.178899946  | 2.025565681  | 6.332234211  |
| 112755 | 4.259723664  | 3.6761388 | 4.843308497  | 0.289051906  | -0.352108471 | 0.930212283  |
| 112770 | 3.805664353  | 3.9195059 | 3.69182277   | 6.648899212  | 6.63062078   | 6.667177643  |
| 112812 | 6.607377459  | 6.7393641 | 6.475390811  | 5.529311366  | 5.217852579  | 5.840770153  |
| 112817 | 8.33084037   | 4.9824946 | 6.656667509  | 6.131175268  | 5.840338979  | 6.422011557  |
| 112849 | -0.352108471 | -0.352108 | -0.352108471 | 0.727678478  | 3.919505936  | 7.111333393  |
| 112869 | -0.352108471 | -0.352108 | -0.352108471 | 5.886425029  | 4.296838028  | 7.47601203   |
| 112936 | -0.352108471 | -0.352108 | -0.352108471 | 8.170666918  | 6.705287512  | 5.239908106  |
| 112937 | 4.112585606  | 3.5540616 | 4.671109593  | 5.432742342  | 2.095853319  | 8.769631366  |
| 112939 | 5.876276997  | 6.507143  | 5.245410946  | 7.144947014  | 8.081466428  | 9.017985843  |
| 112950 | -0.352108471 | -0.352108 | -0.352108471 | 5.494417177  | 5.494417177  | 5.494417177  |
| 113000 | -0.352108471 | -0.352108 | -0.352108471 | 7.716865863  | 6.676264726  | 7.196565294  |
| 113026 | 6.444650146  | 6.3324667 | 6.220283192  | 5.494664348  | 8.694035602  | 7.094349975  |
| 113130 | -0.352108471 | -0.352108 | -0.352108471 | 5.372211021  | 3.304083104  | 4.338147062  |
| 113146 | 5.719564994  | 5.9510862 | 5.488043761  | 0.762376451  | -0.352108471 | 1.876861374  |
| 113157 | 7.882737453  | 3.7812592 | 5.831998311  | 6.296534544  | 5.229100122  | 5.762817333  |
| 113178 | 6.624675593  | 3.5821848 | 9.667166343  | 7.511116711  | 8.930133989  | 8.22062535   |
| 113179 | -0.352108471 | -0.352108 | -0.352108471 | 5.048691416  | 7.063416581  | 6.056053999  |
| 113189 | -0.352108471 | -0.352108 | -0.352108471 | 6.51496239   | 6.532588736  | 6.497336045  |
| 113201 | 4.094704148  | 4.4385056 | 4.782306959  | 4.303912246  | 5.225490971  | 3.382333521  |
| 113246 | 6.690302477  | 6.6930999 | 6.687505103  | 6.445143931  | 4.923713223  | 5.684428577  |
| 113251 | -0.352108471 | -0.352108 | -0.352108471 | 4.927679215  | 4.954218546  | 4.901139884  |
| 113277 | 7.890827346  | 5.9573941 | 9.824260545  | 6.691957149  | 6.595493818  | 6.788420481  |
| 113278 | -0.352108471 | -0.352108 | -0.352108471 | 6.149337851  | 6.309687355  | 5.988988346  |
| 113402 | 6.932009707  | 5.6886226 | 4.445235587  | 4.343111875  | 4.927679215  | 5.512246555  |
| 113444 | -0.352108471 | -0.352108 | -0.352108471 | 6.60719621   | 6.79004344   | 6.97289067   |
| 113510 | 4.918926546  | 4.4826926 | 5.355160532  | -0.352108471 | -0.352108471 | -0.352108471 |
| 113612 | -0.352108471 | -0.352108 | -0.352108471 | 5.859617369  | 5.370299232  | 6.348935506  |
| 113691 | 7.184411154  | 5.1570997 | 6.17075544   | 5.375956071  | 6.313902726  | 5.844929398  |
| 113829 | 1.383520155  | -0.352108 | 3.119148782  | 8.23304433   | 2.505619847  | 5.369332089  |
| 113878 | 5.456586205  | 5.7494021 | 6.042218023  | -0.352108471 | -0.352108471 | -0.352108471 |
| 114026 | 5.240570946  | 2.1409703 | 3.690770627  | 4.944973278  | 2.007275259  | 3.476124269  |
| 114041 | 1.66201518   | 3.6761388 | -0.352108471 | 3.818098858  | 4.482692559  | 3.153505157  |
| 114049 | 6.590838154  | 6.6952683 | 6.486407992  | -0.352108471 | -0.352108471 | -0.352108471 |
| 114224 | 6.186998191  | 6.3713983 | 6.002598127  | 8.850902243  | 3.66408391   | 6.257493076  |
| 114299 | 8.82200586   | 6.1722592 | 3.522512573  | 8.769536334  | 6.463674915  | 4.157813496  |

|        |              |           |              |              |              |              |
|--------|--------------|-----------|--------------|--------------|--------------|--------------|
| 114327 | 4.434314669  | 4.0914425 | 4.777186851  | 5.789762726  | 5.302571806  | 6.276953646  |
| 114609 | 6.335756628  | 4.1075772 | 5.221666912  | 3.629619582  | 3.76507088   | 3.900522179  |
| 114614 | -0.352108471 | -0.352108 | -0.352108471 | 1.968661759  | 0.713037454  | 3.224286064  |
| 114625 | 6.332466669  | 6.89282   | 5.77211331   | -0.352108471 | -0.352108471 | -0.352108471 |
| 114769 | 6.729557555  | 4.520764  | 5.625160771  | -0.352108471 | -0.352108471 | -0.352108471 |
| 114781 | 6.161399353  | 3.1385599 | 4.649979619  | 1.086055948  | 1.731739118  | 0.440372779  |
| 114783 | -0.352108471 | -0.352108 | -0.352108471 | 3.268770296  | 7.38266186   | 5.325716078  |
| 114785 | 4.181357699  | 5.4923767 | 4.83686721   | 6.025473287  | 4.869616713  | 7.18132986   |
| 114795 | 4.630899821  | 6.2144081 | 7.797916351  | 0.624614178  | 0.808855576  | 0.440372779  |
| 114803 | 5.088910439  | 8.4853577 | 6.787134073  | -0.352108471 | -0.352108471 | -0.352108471 |
| 114804 | 7.146175474  | 7.2305473 | 7.061803645  | 5.760537073  | 5.775231583  | 5.745842563  |
| 114814 | 7.576136979  | 7.0545431 | 7.315340054  | 6.637716396  | 7.013354726  | 6.262078066  |
| 114819 | 7.497721025  | 8.2487146 | 6.746727467  | 6.126614759  | 7.759074157  | 6.942844458  |
| 114823 | -0.352108471 | -0.352108 | -0.352108471 | 6.982834856  | 3.459527511  | 10.5061422   |
| 114825 | 7.07688723   | 5.564538  | 8.589236427  | -0.352108471 | -0.352108471 | -0.352108471 |
| 114826 | 9.626192922  | 9.3702723 | 9.882113544  | 7.06010079   | 8.205103199  | 7.632601994  |
| 114836 | 3.020747404  | 4.7138991 | 6.407050724  | -0.352108471 | -0.352108471 | -0.352108471 |
| 114879 | 5.821447986  | 5.6886226 | 5.555797308  | 4.29934907   | 6.751466056  | 9.203583042  |
| 114880 | 2.995934318  | 6.3439771 | -0.352108471 | 3.119148782  | 3.119148782  | 3.119148782  |
| 114883 | 7.637794788  | 5.4937832 | 3.349771642  | 5.052267685  | 5.964683346  | 4.139852025  |
| 114897 | 5.774370319  | 3.5850742 | 7.963666421  | 3.970413419  | 8.681073916  | 6.325743667  |
| 114904 | 7.255201004  | 8.0881657 | 7.671683361  | 7.774346644  | 7.798259589  | 7.750433698  |
| 114907 | 6.195541118  | 6.2558778 | 6.135204448  | -0.352108471 | -0.352108471 | -0.352108471 |
| 114908 | 7.600442205  | 8.0167969 | 7.808619573  | 6.705026474  | 6.449940077  | 6.577483275  |
| 114926 | -0.352108471 | -0.352108 | -0.352108471 | 1.783698732  | -0.352108471 | 3.919505936  |
| 114960 | 5.268658791  | 6.3519473 | 7.435235832  | 5.471958612  | 6.164674546  | 6.857390479  |
| 114984 | 6.674128879  | 6.7008502 | 6.647407551  | 6.165870606  | 5.76911462   | 6.562626592  |
| 114987 | 6.762900357  | 6.6644287 | 6.713664529  | -0.352108471 | -0.352108471 | -0.352108471 |
| 114990 | 8.423332855  | 8.7242509 | 9.025168973  | 6.529110117  | 8.06432575   | 9.599541384  |
| 114991 | 8.714268537  | 8.9376253 | 8.490911731  | 7.618437404  | 4.927679215  | 2.236921026  |
| 115024 | 4.275651379  | 3.9195059 | 4.631796822  | 6.570974966  | 5.886988646  | 7.254961286  |
| 115098 | -0.352108471 | -0.352108 | -0.352108471 | 8.0829707    | 7.054600764  | 6.026230829  |
| 115110 | -0.352108471 | -0.352108 | -0.352108471 | 1.968661759  | 1.997577452  | 1.939746065  |
| 115196 | 8.559383458  | 8.748505  | 8.370261881  | 4.533402076  | 4.954218546  | 4.112585606  |
| 115265 | -0.352108471 | -0.352108 | -0.352108471 | 5.095423988  | 5.124543452  | 5.066304524  |
| 115273 | 7.804017298  | 6.2663731 | 4.728728856  | 4.621417873  | 4.137528819  | 3.653639765  |
| 115290 | 6.55168719   | 5.4173924 | 5.984539772  | 7.937861295  | 6.572889217  | 5.207917138  |
| 115294 | 5.287831912  | 4.0981463 | 4.692989119  | 2.451290702  | 3.507061063  | 1.395520341  |
| 115352 | -0.352108471 | -0.352108 | -0.352108471 | 4.505562533  | 7.754237547  | 6.12990004   |
| 115361 | 5.523369442  | 10.180203 | 7.851786454  | 8.817904547  | 4.246570244  | 6.532237396  |
| 115362 | 6.407695919  | 6.6215439 | 6.193847962  | 1.961524965  | 1.731739118  | 2.191310813  |
| 115399 | 4.58858854   | 5.895268  | 3.281909073  | 2.575541304  | 1.997577452  | 3.153505157  |
| 115416 | -0.352108471 | -0.352108 | -0.352108471 | 4.66005769   | 4.268954283  | 5.051161096  |
| 115572 | -0.352108471 | -0.352108 | -0.352108471 | 2.536362819  | 2.837303708  | 2.686833264  |
| 115704 | 6.927825301  | 7.0247388 | 7.121652232  | 5.983736712  | 6.002308672  | 5.965164752  |
| 115708 | 5.174316983  | 4.1788999 | 3.183482908  | 6.082070874  | 5.869665514  | 5.657260155  |
| 115727 | 6.463674915  | 6.7587503 | 6.168599573  | -0.352108471 | -0.352108471 | -0.352108471 |

|        |              |           |              |              |              |              |
|--------|--------------|-----------|--------------|--------------|--------------|--------------|
| 115752 | 7.389968954  | 7.844834  | 7.617401495  | 6.101908953  | 5.658147203  | 6.545670703  |
| 115761 | 2.179993378  | 4.7480446 | 7.316095872  | 1.493791735  | 2.438117353  | 0.549466117  |
| 115817 | 2.46950858   | 8.2398627 | 5.354685649  | 6.924275141  | 6.087644454  | 5.251013768  |
| 115825 | 4.947007189  | 4.9799919 | 4.914022459  | -0.352108471 | -0.352108471 | -0.352108471 |
| 115908 | 9.219732269  | 6.8119539 | 4.40417554   | 4.200268952  | 4.927679215  | 5.655089478  |
| 115939 | 6.982793148  | 6.9037827 | 7.061803645  | 6.472605455  | 6.33538923   | 6.609821679  |
| 115992 | -0.352108471 | -0.352108 | -0.352108471 | 1.079006084  | 1.90830372   | 2.737601355  |
| 116028 | -0.352108471 | -0.352108 | -0.352108471 | 6.138118665  | 5.88700099   | 5.635883314  |
| 116039 | 0.882771258  | 6.7285574 | 3.805664353  | 2.419557138  | 5.191222747  | -0.352108471 |
| 116068 | 6.020381091  | 6.0384535 | 6.002308672  | 6.382873477  | 6.410585269  | 6.355161685  |
| 116092 | -0.352108471 | -0.352108 | -0.352108471 | 6.584450939  | 6.515031054  | 6.653870824  |
| 116113 | 6.729383037  | 5.8735024 | 7.585263678  | 6.003711401  | 7.550539586  | 6.777125493  |
| 116138 | 4.789355786  | 5.5282948 | 6.267233838  | -0.352108471 | -0.352108471 | -0.352108471 |
| 116150 | 7.738876885  | 7.7464157 | 7.731338116  | 4.927679215  | 4.954218546  | 4.901139884  |
| 116151 | 7.181337851  | 5.7282969 | 4.275256032  | 0.616568244  | 4.637333234  | 8.658098224  |
| 116224 | -0.352108471 | -0.352108 | -0.352108471 | 6.194240113  | 5.958359385  | 5.722478656  |
| 116225 | 6.000828803  | 5.2532408 | 4.505652781  | 3.978191052  | 5.637296679  | 7.296402306  |
| 116228 | 1.783698732  | -0.352108 | 3.919505936  | 4.534956964  | 7.679280208  | 6.107118586  |
| 116236 | 6.846751508  | 5.3621074 | 6.104429468  | 3.319372359  | 4.286421842  | 3.8028971    |
| 116254 | 6.888413829  | 6.9598529 | 6.816974741  | 0.044132154  | 0.440372779  | -0.352108471 |
| 116349 | 6.183964016  | 6.0089248 | 6.359003202  | -0.352108471 | -0.352108471 | -0.352108471 |
| 116372 | -0.352108471 | -0.352108 | -0.352108471 | 3.440349165  | 1.933317362  | 2.686833264  |
| 116448 | 5.833597119  | 5.6652071 | 5.749402114  | -0.352108471 | -0.352108471 | -0.352108471 |
| 116461 | -0.352108471 | -0.352108 | -0.352108471 | 5.779855963  | 4.558459688  | 5.169157826  |
| 116496 | 6.444919838  | 8.0880012 | 4.801838443  | 5.435979445  | 6.317926244  | 5.876952844  |
| 116535 | -0.352108471 | -0.352108 | -0.352108471 | 3.554793223  | 5.494417177  | 7.43404113   |
| 116540 | -0.352108471 | -0.352108 | -0.352108471 | 7.434031101  | 5.338202135  | 3.242373168  |
| 116541 | 4.471025746  | 6.6741289 | 8.877232011  | 6.017271115  | 8.438834653  | 7.228052884  |
| 116828 | 6.861057494  | 6.8767254 | 6.845389604  | -0.352108471 | -0.352108471 | -0.352108471 |
| 116840 | -0.352108471 | -0.352108 | -0.352108471 | 5.412561087  | 4.483586226  | 6.341535949  |
| 116844 | 7.429291064  | 7.5142953 | 7.3442868    | 6.962345725  | 6.202627216  | 5.442908708  |
| 116966 | 5.252571404  | 6.8661071 | 3.639035742  | 6.3775071    | -0.982915775 | 2.697295663  |
| 116969 | 5.425512467  | 7.1221521 | 6.273832259  | -0.352108471 | -0.352108471 | -0.352108471 |
| 116985 | -0.352108471 | -0.352108 | -0.352108471 | 6.769641641  | 6.788420481  | 6.750862801  |
| 116988 | 7.379382859  | 4.1194214 | 5.749402114  | 7.543842494  | 8.087936625  | 7.81588956   |
| 117144 | 3.62216954   | 2.5886014 | 1.555033355  | -0.352108471 | -0.352108471 | -0.352108471 |
| 117145 | 10.16062596  | 6.7689979 | 3.377369755  | 7.040807296  | 5.919349629  | 8.162264963  |
| 117177 | 6.570295729  | 4.1434958 | 5.356895761  | 6.816633855  | 4.902600883  | 5.859617369  |
| 117178 | -0.352108471 | -0.352108 | -0.352108471 | 9.168109774  | 6.022050925  | 2.875992076  |
| 117195 | 5.245137737  | 5.5873575 | 5.929577197  | 5.516569456  | 5.748307778  | 5.632438617  |
| 117245 | 4.660293379  | 4.5885885 | 4.516883701  | 5.939192221  | 7.513583201  | 4.364801242  |
| 117246 | -0.352108471 | -0.352108 | -0.352108471 | 3.114831108  | 5.821410838  | 8.527990568  |
| 117531 | 3.019155055  | 3.5193274 | 4.019499663  | 0.95875246   | 2.649848031  | 1.804300246  |
| 117581 | -0.352108471 | -0.352108 | -0.352108471 | 5.663737322  | 5.665786693  | 5.661687951  |
| 118424 | 8.222532838  | 6.0956474 | 7.15909013   | 7.439787929  | 5.518732824  | 6.479260377  |
| 118429 | -0.352108471 | -0.352108 | -0.352108471 | 6.087644454  | 8.090023534  | 4.085265375  |
| 118442 | -0.352108471 | -0.352108 | -0.352108471 | 4.80208491   | 4.843308497  | 4.760861323  |

|        |              |           |              |              |              |              |
|--------|--------------|-----------|--------------|--------------|--------------|--------------|
| 118460 | 8.399900192  | 7.4764785 | 6.553056862  | 2.97797424   | 3.649308576  | 2.306639904  |
| 118461 | -0.352108471 | -0.352108 | -0.352108471 | 1.997577452  | 1.997577452  | 1.997577452  |
| 118472 | -0.352108471 | -0.352108 | -0.352108471 | 3.580823089  | 4.80208491   | 6.023346731  |
| 118490 | 5.424058049  | 5.1245435 | 5.723572646  | 2.368970958  | 2.051108653  | 2.686833264  |
| 118611 | -0.352108471 | -0.352108 | -0.352108471 | 6.285554459  | 6.31523113   | 6.255877787  |
| 118812 | 4.376528333  | 5.3889489 | 4.882738629  | 1.847863424  | 4.993022525  | 3.420442975  |
| 118924 | 6.438353249  | 7.0441776 | 5.832528937  | 6.443439905  | 6.813225323  | 6.073654487  |
| 118980 | 5.725558391  | 5.1529298 | 4.580301181  | -2.883197702 | 2.030285487  | 6.943768677  |
| 118987 | 6.868723584  | 7.0238681 | 7.17901253   | 7.601341029  | 5.967751069  | 6.784546049  |
| 119392 | 4.223002093  | 4.5307426 | 3.915261593  | 5.226639187  | 4.213349141  | 3.200059094  |
| 119467 | -0.352108471 | -0.352108 | -0.352108471 | 4.80208491   | 6.426981033  | 3.177188788  |
| 119504 | 9.033875044  | 7.2703879 | 10.79736214  | 6.360718632  | 9.456552772  | 7.908635702  |
| 119679 | 5.217491139  | 5.2437595 | 5.191222747  | -0.352108471 | -0.352108471 | -0.352108471 |
| 119692 | 5.527756134  | 5.719565  | 5.911373854  | -0.352108471 | -0.352108471 | -0.352108471 |
| 119749 | 4.248846646  | 5.1006122 | 5.95237771   | -0.352108471 | -0.352108471 | -0.352108471 |
| 119764 | -0.352108471 | -0.352108 | -0.352108471 | 5.325716078  | 5.336173319  | 5.315258837  |
| 120114 | 5.157610748  | 7.125009  | 3.190212489  | 4.297726199  | 3.615460478  | 4.979991919  |
| 120224 | 5.226167363  | 4.5971331 | 4.911650208  | 2.024343053  | 2.051108653  | 1.997577452  |
| 120425 | -0.352108471 | -0.352108 | -0.352108471 | 5.564327261  | 5.045930461  | 4.52753366   |
| 120526 | 4.678491524  | 4.9841518 | 4.831321667  | 3.203655936  | 8.889907897  | 6.046781917  |
| 120787 | -0.352108471 | -0.352108 | -0.352108471 | 5.000355532  | 5.118656602  | 5.236957671  |
| 120892 | 6.891019964  | 4.5776666 | 9.204373279  | 7.247844574  | 6.288551791  | 8.207137358  |
| 121006 | 7.585015974  | 6.1215288 | 4.658041564  | -0.352108471 | -0.352108471 | -0.352108471 |
| 121256 | -0.352108471 | -0.352108 | -0.352108471 | 5.663737322  | 3.454608303  | 7.87286634   |
| 121260 | -0.352108471 | -0.352108 | -0.352108471 | 5.233567424  | 6.041107527  | 4.42602732   |
| 121274 | -0.352108471 | -0.352108 | -0.352108471 | 4.606385815  | 5.529311366  | 6.452236916  |
| 121441 | 10.10188767  | 3.67494   | 6.888413829  | 1.114208477  | 1.880238567  | 2.646268658  |
| 121456 | 4.583433279  | 5.054281  | 4.112585606  | 0.440372779  | 0.440372779  | 0.440372779  |
| 121457 | 4.75203451   | 6.1348006 | 7.517566721  | 5.831882629  | 7.098774477  | 8.365666325  |
| 121512 | 6.799519626  | 6.5884653 | 7.010573985  | 3.753284825  | 2.191310813  | 5.315258837  |
| 121551 | 7.758936954  | 4.9888483 | 2.218759731  | 4.456886199  | 3.993367271  | 4.920405128  |
| 121599 | 1.783698732  | 1.0981297 | 2.469267744  | 0.874413692  | 2.100935855  | -0.352108471 |
| 121601 | 3.134717702  | 6.6215439 | -0.352108471 | 5.436203094  | 4.754644882  | 5.095423988  |
| 121665 | 6.917345136  | 6.0592292 | 6.488287179  | 6.38229808   | 7.612704881  | 8.843111683  |
| 122416 | -0.352108471 | -0.352108 | -0.352108471 | 6.392584054  | 6.396868383  | 6.401152711  |
| 122704 | 5.826911535  | 6.9393943 | 8.051877111  | 1.448328272  | 1.598101998  | 1.747875723  |
| 122769 | 7.503777584  | 2.9312047 | 5.217491139  | 6.631846251  | 3.935625393  | 9.32806711   |
| 122773 | -0.352108471 | -0.352108 | -0.352108471 | 3.607604587  | 4.911650208  | 6.21569583   |
| 122786 | 7.586845637  | 6.183964  | 4.781082394  | 6.616491993  | 6.266367194  | 5.916242394  |
| 122953 | 6.332466669  | 6.4048935 | 6.260039847  | -0.352108471 | -0.352108471 | -0.352108471 |
| 123041 | 7.163447031  | 8.7374215 | 10.31139595  | 3.80284622   | 10.02217215  | 6.912509186  |
| 123096 | 6.212536209  | 8.4620038 | 3.963068578  | -0.352108471 | -0.352108471 | -0.352108471 |
| 123207 | 6.281347898  | 6.1414231 | 6.421272681  | 3.761755053  | 1.807952763  | 5.715557343  |
| 123228 | 5.625160771  | 4.1907334 | 7.059588108  | -0.352108471 | -0.352108471 | -0.352108471 |
| 123263 | 9.671746895  | 8.8211847 | 7.970622429  | 6.662402318  | 7.334312635  | 6.998357476  |
| 123283 | 4.382026917  | 7.4963575 | 5.939192221  | -0.352108471 | -0.352108471 | -0.352108471 |
| 123606 | -0.352108471 | -0.352108 | -0.352108471 | 7.28018736   | 7.003799972  | 6.727412585  |

|        |              |           |              |              |              |              |
|--------|--------------|-----------|--------------|--------------|--------------|--------------|
| 123720 | 6.555519439  | 6.7952996 | 6.315739249  | 7.329601031  | 7.702446957  | 6.956755105  |
| 123722 | 8.056217068  | 7.6520774 | 7.854147238  | 6.316353013  | 5.939497163  | 5.562641312  |
| 123745 | 6.327522603  | 8.6061228 | 7.46682272   | 1.158617076  | 1.876861374  | 0.440372779  |
| 123811 | 4.821539291  | 3.8306378 | 5.812440747  | 0.939116071  | 0.440372779  | 1.437859363  |
| 123879 | 3.00530001   | 7.8514877 | 5.428393874  | 0.044132154  | -0.352108471 | 0.440372779  |
| 123920 | -0.352108471 | -0.352108 | -0.352108471 | 6.6560422    | 6.674249904  | 6.637834496  |
| 124044 | 4.901927854  | 6.1348006 | 7.367673376  | 0.044132154  | 0.440372779  | -0.352108471 |
| 124149 | 5.800199788  | 5.825168  | 5.775231583  | -0.352108471 | -0.352108471 | -0.352108471 |
| 124152 | 4.942532363  | 6.0450341 | 5.493783215  | 5.807345806  | 4.450744817  | 3.094143827  |
| 124221 | 2.205662717  | 8.2293196 | 5.217491139  | -0.352108471 | -0.352108471 | -0.352108471 |
| 124245 | -0.352108471 | -0.352108 | -0.352108471 | 6.080278611  | 5.825167992  | 6.33538923   |
| 124359 | 5.980215154  | 5.3269274 | 4.673639664  | -0.352108471 | -0.352108471 | -0.352108471 |
| 124402 | 5.028294363  | 5.8529375 | 6.67758056   | 7.768999313  | 5.541320776  | 3.313642238  |
| 124446 | 6.720370627  | 5.9547106 | 7.486030625  | -0.352108471 | -0.352108471 | -0.352108471 |
| 124491 | 10.60070969  | 6.7485569 | 2.896404121  | 6.295505162  | 5.417314844  | 5.856410003  |
| 124583 | -0.352108471 | -0.352108 | -0.352108471 | 9.378282549  | 4.040681465  | 6.709482007  |
| 124739 | 6.303461245  | 5.1625733 | 7.444349219  | -0.352108471 | -0.352108471 | -0.352108471 |
| 124773 | -0.352108471 | -0.352108 | -0.352108471 | 5.86831314   | 3.375240742  | 4.621776941  |
| 124801 | 2.794181776  | 2.280957  | 1.767732212  | 4.105630685  | 9.136705405  | 6.621168045  |
| 124808 | -0.352108471 | -0.352108 | -0.352108471 | 5.924907944  | 7.317428146  | 6.621168045  |
| 124842 | -0.352108471 | -0.352108 | -0.352108471 | 5.55542532   | 6.532441983  | 7.509458647  |
| 124857 | -0.352108471 | -0.352108 | -0.352108471 | 7.696187302  | 5.983736712  | 4.271286122  |
| 124923 | 2.670466985  | 4.4868934 | 6.303319902  | 3.77278635   | 3.953434078  | 4.134081806  |
| 124935 | 8.163200626  | 10.705685 | 5.620716389  | 5.325565994  | 10.64716998  | 7.986367989  |
| 124961 | 5.152247113  | 5.1799508 | 5.124543452  | -0.352108471 | -0.352108471 | -0.352108471 |
| 124975 | 7.738685842  | 5.9874902 | 4.236294566  | 7.610738001  | 5.769760533  | 6.690249267  |
| 124995 | 6.677917073  | 5.5916842 | 6.134800615  | 2.335166442  | 2.536084801  | 2.737003159  |
| 125050 | 6.120953226  | 6.278238  | 6.199595632  | -0.352108471 | -0.352108471 | -0.352108471 |
| 125061 | 7.962002853  | 7.3176651 | 6.673327363  | 5.607838856  | 5.798039202  | 5.702939029  |
| 125144 | -0.352108471 | -0.352108 | -0.352108471 | 7.394190584  | 10.98355153  | 3.804829637  |
| 125150 | 7.141642983  | 5.7429144 | 4.344185765  | 1.864658285  | -0.017926954 | 3.747243524  |
| 125476 | -0.352108471 | -0.352108 | -0.352108471 | 5.821410838  | 6.153574972  | 5.489246703  |
| 125919 | 8.335688791  | 7.5180702 | 6.700451683  | 7.217174762  | 6.680596033  | 6.144017305  |
| 125931 | -0.352108471 | -0.352108 | -0.352108471 | 5.528678444  | 3.899165999  | 4.713922221  |
| 125950 | 4.666721742  | 6.190066  | 5.428393874  | 5.292713606  | 6.751388245  | 6.022050925  |
| 125958 | 5.983728392  | 6.6231941 | 6.303461245  | -0.352108471 | -0.352108471 | -0.352108471 |
| 125965 | 7.192332117  | 5.599099  | 4.005865821  | 4.5986471    | 5.599602802  | 5.099124951  |
| 125981 | 6.415311207  | 5.1903345 | 7.640287881  | 1.245740716  | 0.440372779  | 2.051108653  |
| 126003 | 2.905418398  | 4.1248641 | 3.515141236  | 8.87755094   | 5.578623452  | 7.228087196  |
| 126017 | -0.352108471 | -0.352108 | -0.352108471 | 2.501526031  | -0.352108471 | 5.355160532  |
| 126069 | 4.476787422  | 5.1914165 | 4.834101937  | 1.394345699  | -0.361039605 | 3.149731003  |
| 126070 | 6.708309831  | 5.6067887 | 4.505267587  | 3.591481705  | 3.79021001   | 3.988938314  |
| 126074 | 5.954590303  | 5.5882244 | 6.320956231  | 3.87211091   | 2.051108653  | 5.693113166  |
| 126129 | -0.352108471 | -0.352108 | -0.352108471 | 3.490670316  | 5.494417177  | 7.498164037  |
| 126133 | 5.790856505  | 5.8744121 | 5.707300866  | 3.864985883  | 4.72458994   | 5.584193997  |
| 126147 | 6.912042523  | 5.3043679 | 8.519717113  | 2.166656576  | 1.646479888  | 2.686833264  |
| 126204 | -0.352108471 | -0.352108 | -0.352108471 | 8.419881835  | 5.55876787   | 2.697653905  |



|        |              |           |              |              |              |              |
|--------|--------------|-----------|--------------|--------------|--------------|--------------|
| 126205 | 5.64625513   | 5.5591194 | 5.733390872  | 1.895859924  | 1.141109877  | 1.518484901  |
| 126208 | -0.352108471 | -0.352108 | -0.352108471 | 5.738003302  | 5.284974356  | 4.83194541   |
| 126259 | 3.564438277  | 4.3359073 | 5.107376412  | 0.440372779  | 0.440372779  | 0.440372779  |
| 126298 | -0.352108471 | -0.352108 | -0.352108471 | 1.783698732  | 1.928763824  | 1.638633641  |
| 126299 | -0.352108471 | -0.352108 | -0.352108471 | 3.717018359  | 6.217192107  | 4.967105233  |
| 126308 | 6.670900682  | 5.476238  | 4.281575288  | 7.090285804  | 7.521974665  | 7.953663525  |
| 126321 | 5.31909676   | 2.610908  | 8.027285488  | 7.811863603  | 6.190074859  | 7.000969231  |
| 126328 | 7.791755961  | 7.8693257 | 7.714186196  | 6.769641641  | 6.788420481  | 6.750862801  |
| 126364 | 3.445762001  | 6.2806901 | 4.863226045  | 1.394345699  | 1.14221151   | 1.646479888  |
| 126374 | 6.121528769  | 3.9213219 | 8.321735645  | -0.352108471 | -0.352108471 | -0.352108471 |
| 126393 | 9.141419653  | 6.6846231 | 7.913021367  | 7.725479856  | 9.68416352   | 8.704821688  |
| 126433 | 6.570570825  | 4.7680391 | 8.373102544  | 6.774861833  | 6.775911759  | 6.775386796  |
| 126549 | 6.783301918  | 6.8767254 | 6.689878453  | 4.899465632  | 3.337746555  | 6.461184708  |
| 126661 | 5.242983992  | 5.9831939 | 5.613088937  | 1.036211897  | 1.14221151   | 0.930212283  |
| 126669 | 10.62416941  | 4.8364324 | 7.730300925  | 0.395051519  | 1.14221151   | -0.352108471 |
| 126731 | 6.695975478  | 4.0133958 | 5.354685649  | 5.923493182  | 3.694651085  | 8.152335279  |
| 126792 | 4.550307802  | 5.4196962 | 3.680919435  | 3.588210414  | 6.878924433  | 5.233567424  |
| 126868 | 4.286259633  | 6.7013068 | 5.493783215  | -0.352108471 | -0.352108471 | -0.352108471 |
| 126917 | 6.382873477  | 6.3791753 | 6.386571668  | -0.352108471 | -0.352108471 | -0.352108471 |
| 127002 | -0.352108471 | -0.352108 | -0.352108471 | 6.056053999  | 6.073654487  | 6.038453511  |
| 127253 | -0.352108471 | -0.352108 | -0.352108471 | 4.701167306  | 6.001809131  | 7.302450957  |
| 127254 | -0.352108471 | -0.352108 | -0.352108471 | 4.358033276  | 5.760537073  | 7.16304087   |
| 127262 | -0.352108471 | -0.352108 | -0.352108471 | 7.003799972  | 7.016299086  | 6.991300859  |
| 127281 | 5.455547246  | 5.1826463 | 5.31909676   | 2.881913056  | 2.179939357  | 1.477965658  |
| 127294 | 6.247578166  | 5.7072189 | 5.97739855   | 1.085571587  | 5.249226858  | 3.167399223  |
| 127428 | 4.549728355  | 5.1799508 | 3.919505936  | 3.241094247  | 2.051108653  | 4.43107984   |
| 127435 | 5.183015302  | 4.8512576 | 5.017136436  | 2.289360373  | 2.274515706  | 2.25967104   |
| 127495 | 2.764225616  | 3.7080885 | 1.820362695  | -0.352108471 | -0.352108471 | -0.352108471 |
| 127544 | 6.854454372  | 9.0781625 | 7.966308413  | 6.12990004   | 7.325589341  | 4.93421074   |
| 127687 | 3.076450934  | 3.9622038 | 3.519327359  | 2.076022254  | 2.100935855  | 2.051108653  |
| 127703 | 6.469314697  | 7.6046979 | 5.333931507  | 5.961166865  | 7.003730975  | 4.918602756  |
| 127731 | -0.352108471 | -0.352108 | -0.352108471 | 1.577677026  | 2.633343959  | 3.689010892  |
| 127829 | 7.134347894  | 6.0203811 | 4.906414289  | 8.527189358  | 6.297476756  | 7.412333057  |
| 127933 | 6.674128879  | 9.2089668 | 4.139290942  | 5.535358938  | 4.549849375  | 6.520868501  |
| 128077 | 9.181761489  | 9.1862683 | 9.177254692  | 6.728640909  | 6.497336045  | 6.959945773  |
| 128102 | 5.868265759  | 5.3152588 | 6.421272681  | 6.504868974  | 6.588465267  | 6.421272681  |
| 128178 | 4.942353437  | 4.8304259 | 5.054280952  | 3.80092067   | 4.482692559  | 3.119148782  |
| 128240 | 5.249862356  | 5.4595089 | 5.354685649  | 4.764422158  | 6.296043865  | 7.827665573  |
| 128272 | -0.352108471 | -0.352108 | -0.352108471 | 4.559699198  | 6.307285814  | 2.812112583  |
| 128371 | -0.352108471 | -0.352108 | -0.352108471 | 3.261546676  | 3.919505936  | 4.577465195  |
| 128387 | 9.078698995  | 7.294256  | 10.86314203  | 6.881186765  | 8.231814137  | 9.582441509  |
| 128553 | 3.164602038  | 6.7781556 | 4.97137884   | 5.079283667  | 7.216263253  | 2.942304082  |
| 128637 | 4.636275217  | 8.784884  | 6.710579627  | 5.422285101  | 5.529311366  | 5.315258837  |
| 128674 | 4.298298976  | 5.9222488 | 5.1102739    | 0.476561106  | -0.352108471 | 1.305230684  |
| 128861 | -0.352108471 | -0.352108 | -0.352108471 | 5.307880044  | 5.852863847  | 6.39784765   |
| 128866 | 8.383860249  | 7.4912415 | 6.59862276   | 10.74185558  | 7.721463244  | 4.701070904  |
| 128869 | -0.352108471 | -0.352108 | -0.352108471 | 1.059179699  | 5.179117864  | 3.119148782  |

|        |              |           |              |              |              |              |
|--------|--------------|-----------|--------------|--------------|--------------|--------------|
| 128872 | 5.436925628  | 5.9583273 | 6.479729071  | 5.667033469  | 5.517905788  | 5.816161149  |
| 128876 | 6.245901837  | 7.0074534 | 5.484350273  | -0.352108471 | -0.352108471 | -0.352108471 |
| 128954 | -0.352108471 | -0.352108 | -0.352108471 | 1.492819042  | 3.337746555  | -0.352108471 |
| 128977 | -0.352108471 | -0.352108 | -0.352108471 | 6.463674915  | 6.916156778  | 6.011193051  |
| 128989 | 5.974072495  | 5.4694396 | 4.96480678   | 6.994280132  | 8.823759625  | 5.164800639  |
| 129049 | 8.034340119  | 6.1096989 | 9.958981353  | 8.325954428  | 6.449118953  | 7.387536691  |
| 129138 | -0.352108471 | -0.352108 | -0.352108471 | 5.096091601  | 6.312578908  | 5.704335255  |
| 129401 | 6.346727397  | 5.4937832 | 4.640839033  | -0.352108471 | -0.352108471 | -0.352108471 |
| 129446 | 5.428393874  | 5.4582551 | 5.398532684  | -0.352108471 | -0.352108471 | -0.352108471 |
| 129531 | 6.073207852  | 7.2978942 | 4.848521532  | 0.975533543  | 1.14221151   | 0.808855576  |
| 129563 | 5.301899295  | 5.7494021 | 6.196904934  | -0.352108471 | -0.352108471 | -0.352108471 |
| 129684 | -0.352108471 | -0.352108 | -0.352108471 | 3.919505936  | 3.919505936  | 3.919505936  |
| 129685 | 8.447321071  | 8.4654461 | 8.429196032  | 6.180197528  | 7.295056154  | 8.409914779  |
| 129787 | -0.352108471 | -0.352108 | -0.352108471 | 6.262794607  | 6.668713086  | 6.465753847  |
| 129804 | -0.352108471 | -0.352108 | -0.352108471 | 5.791816861  | 3.585121301  | 1.378425741  |
| 129831 | 5.247322627  | 5.3920614 | 5.53680009   | -0.352108471 | -0.352108471 | -0.352108471 |
| 129852 | -0.352108471 | -0.352108 | -0.352108471 | 5.329241098  | 6.810846835  | 6.070043966  |
| 129868 | 2.41236255   | 2.4154798 | 2.413921152  | -0.352108471 | -0.352108471 | -0.352108471 |
| 129880 | 10.68066338  | 11.797486 | 9.563841193  | 8.066020999  | 9.302845624  | 10.53967025  |
| 130026 | 9.052242903  | 9.0028661 | 8.953489292  | 7.768534579  | 8.02211051   | 7.514958648  |
| 130074 | -0.352108471 | -0.352108 | -0.352108471 | 6.406486527  | 6.6742236    | 6.138749454  |
| 130367 | 6.022844903  | 8.3873256 | 7.205085245  | 0.975533543  | 0.808855576  | 1.14221151   |
| 130535 | -0.352108471 | -0.352108 | -0.352108471 | 5.718459767  | 3.905932344  | 7.530987189  |
| 130617 | 5.592623053  | 5.0306439 | 6.15460216   | 7.974042457  | 6.903642175  | 5.833241892  |
| 130749 | 5.354685649  | 3.3264552 | 7.382916079  | -0.352108471 | -0.352108471 | -0.352108471 |
| 130813 | 4.446433087  | 4.7923037 | 5.138174251  | -0.352108471 | -0.352108471 | -0.352108471 |
| 130940 | 7.376378972  | 5.2885544 | 6.332466669  | -0.352108471 | -0.352108471 | -0.352108471 |
| 130951 | 2.774371847  | 2.6547897 | 2.535207633  | -0.352108471 | -0.352108471 | -0.352108471 |
| 131076 | -0.352108471 | -0.352108 | -0.352108471 | 7.363054506  | 6.022050925  | 4.681047344  |
| 131408 | -0.352108471 | -0.352108 | -0.352108471 | 6.12990004   | 6.135204448  | 6.124595632  |
| 131474 | -0.352108471 | -0.352108 | -0.352108471 | 2.138198525  | 8.052649451  | 5.095423988  |
| 131566 | -0.352108471 | -0.352108 | -0.352108471 | 8.487311391  | 7.690758392  | 6.894205393  |
| 131583 | -0.352108471 | -0.352108 | -0.352108471 | 6.643323087  | 6.876426316  | 7.109529545  |
| 131601 | 5.528242089  | 8.0192395 | 6.77374078   | -0.352108471 | -0.352108471 | -0.352108471 |
| 131616 | 4.84493126   | 8.0217062 | 6.433318728  | -0.352108471 | -0.352108471 | -0.352108471 |
| 131669 | -0.352108471 | -0.352108 | -0.352108471 | 5.821411338  | 4.872224191  | 3.923037043  |
| 131909 | 4.948794725  | 3.1433352 | 6.754254219  | 1.540978788  | 1.939746065  | 1.14221151   |
| 131965 | -0.352108471 | -0.352108 | -0.352108471 | 6.664356519  | 4.487610934  | 5.575983727  |
| 132014 | 6.380626467  | 7.2531836 | 6.816905042  | 1.90830372   | 1.939746065  | 1.876861374  |
| 132320 | -0.352108471 | -0.352108 | -0.352108471 | 6.316732863  | 5.095423988  | 3.874115113  |
| 132332 | -0.352108471 | -0.352108 | -0.352108471 | 6.766572321  | 2.147200078  | 4.456886199  |
| 132660 | 3.234152935  | 5.062887  | 6.891621053  | 3.83226546   | 4.64805297   | 5.46384048   |
| 133060 | 6.058027712  | 4.5801658 | 5.31909676   | -0.352108471 | -0.352108471 | -0.352108471 |
| 133686 | 6.168090483  | 6.1079622 | 6.228218771  | 3.314541055  | 5.191222747  | 1.437859363  |
| 134147 | 8.017253217  | 5.7437985 | 10.29070797  | 8.054446927  | 5.893263659  | 6.973855293  |
| 134218 | 5.766929757  | 4.6198666 | 6.913992945  | 4.666773335  | 1.605880603  | 3.136326969  |
| 134265 | 4.683876778  | 5.3910182 | 6.098159551  | 7.36272357   | 5.651048706  | 6.506886138  |

|        |              |           |              |              |              |              |
|--------|--------------|-----------|--------------|--------------|--------------|--------------|
| 134266 | -0.352108471 | -0.352108 | -0.352108471 | 4.501651414  | 4.412120985  | 4.456886199  |
| 134353 | 7.656966275  | 6.5318751 | 8.78205747   | 3.550878841  | 4.954218546  | 2.147539136  |
| 134510 | 6.7330713    | 3.4457531 | 5.089412202  | -0.352108471 | -0.352108471 | -0.352108471 |
| 134526 | 0.211262559  | 5.1602016 | 2.685732087  | -0.352108471 | -0.352108471 | -0.352108471 |
| 134549 | 8.713120087  | 11.533853 | 5.892387454  | 7.581912294  | 6.413774262  | 8.750050325  |
| 134553 | 7.289605497  | 7.88829   | 8.486974535  | 9.834760824  | 6.664128189  | 3.493495553  |
| 135112 | 1.783698732  | -0.352108 | 3.919505936  | 4.80208491   | 4.843308497  | 4.760861323  |
| 135114 | 5.915852686  | 6.5705196 | 5.261185764  | 6.106386272  | 5.653299811  | 6.559472732  |
| 135154 | -0.352108471 | -0.352108 | -0.352108471 | 7.149285497  | 5.182455715  | 6.165870606  |
| 135228 | 6.208889547  | 5.4273255 | 5.818107534  | 1.804300246  | 1.731739118  | 1.876861374  |
| 135293 | 4.659953204  | 5.3565025 | 5.008227864  | 1.154753083  | 1.475855286  | 1.796957489  |
| 136647 | -0.352108471 | -0.352108 | -0.352108471 | 5.369332089  | 2.046130426  | 8.692533751  |
| 137362 | -0.352108471 | -0.352108 | -0.352108471 | 2.451290702  | 5.254689875  | -0.352108471 |
| 137392 | -0.352108471 | -0.352108 | -0.352108471 | 6.296043865  | 6.769499241  | 5.82258849   |
| 137492 | -0.352108471 | -0.352108 | -0.352108471 | 5.681727979  | 5.775231583  | 5.588224375  |
| 137964 | 1.25802751   | 9.983755  | 5.620891261  | 6.443033625  | 7.355470506  | 5.530596744  |
| 138241 | 6.008863898  | 6.1690597 | 5.848668051  | 0.044132154  | -0.352108471 | 0.440372779  |
| 138428 | -0.352108471 | -0.352108 | -0.352108471 | 5.555799529  | 7.651301488  | 6.603550508  |
| 138474 | 4.663000528  | 5.9981911 | 3.327809991  | 4.197748308  | 5.993099668  | 5.095423988  |
| 138639 | -0.352108471 | -0.352108 | -0.352108471 | 6.204656258  | 5.470769864  | 6.938542652  |
| 138649 | -0.352108471 | -0.352108 | -0.352108471 | 5.404055244  | 5.971144873  | 5.687600059  |
| 138716 | -0.352108471 | -0.352108 | -0.352108471 | 5.494417177  | 6.140582551  | 4.848251802  |
| 138724 | 5.800199788  | 5.825168  | 5.775231583  | -0.352108471 | -0.352108471 | -0.352108471 |
| 138948 | 4.637201132  | 2.8431725 | 1.049143908  | -0.352108471 | -0.352108471 | -0.352108471 |
| 139081 | -0.352108471 | -0.352108 | -0.352108471 | 0.088697018  | 4.190991333  | 2.139844176  |
| 139221 | 7.450540243  | 6.816905  | 6.183269842  | -0.352108471 | -0.352108471 | -0.352108471 |
| 139422 | 6.071865894  | 1.488281  | 10.65545079  | 0.968206476  | 2.58964242   | 1.778924448  |
| 139538 | 4.591035201  | 5.1522471 | 5.713459025  | -0.352108471 | -0.352108471 | -0.352108471 |
| 139562 | 6.903083627  | 7.8346426 | 7.368863092  | 6.646279159  | 6.224523211  | 7.068035106  |
| 139716 | 1.3830066    | 2.2456    | 3.108193427  | -0.352108471 | -0.352108471 | -0.352108471 |
| 140453 | 6.695281831  | 5.7888147 | 6.242048279  | 3.605011212  | 1.997577452  | 5.212444972  |
| 140459 | 10.06737176  | 4.6703544 | 7.368863092  | 6.32531018   | 7.42133441   | 5.22928595   |
| 140460 | 2.249866357  | 6.618763  | 4.434314669  | 6.191249109  | 4.442775673  | 5.317012391  |
| 140461 | 7.451946507  | 7.4644235 | 7.476900573  | -0.170547908 | 4.044986734  | 1.937219413  |
| 140465 | -0.352108471 | -0.352108 | -0.352108471 | 4.941127012  | 5.526007836  | 5.233567424  |
| 140467 | 5.624683414  | 5.7494021 | 5.874120815  | 6.446390821  | 5.933596618  | 5.420802415  |
| 140469 | 0.985314745  | 6.7547657 | 3.870040209  | 4.80208491   | 4.734528909  | 4.869640911  |
| 140564 | 5.889602147  | 6.0160069 | 6.142411725  | 5.479873401  | 4.089954539  | 6.869792262  |
| 140576 | 2.129081329  | 6.9715343 | 4.550307802  | 7.9014325    | 5.411225172  | 10.39163983  |
| 140597 | 4.222735929  | 5.9560885 | 5.089412202  | -0.352108471 | -0.352108471 | -0.352108471 |
| 140606 | 5.998406448  | 6.9702207 | 5.026592214  | 8.267464527  | 7.854376094  | 7.441287662  |
| 140609 | -0.352108471 | -0.352108 | -0.352108471 | 5.077701691  | 6.641533047  | 5.859617369  |
| 140685 | -0.352108471 | -0.352108 | -0.352108471 | 6.459304363  | 6.497336045  | 6.421272681  |
| 140688 | 7.081937271  | 5.0301707 | 6.056053999  | -0.352108471 | -0.352108471 | -0.352108471 |
| 140690 | 4.576692604  | 6.6592049 | 8.741717178  | 3.772762915  | 3.630416192  | 3.915109637  |
| 140700 | 4.947007189  | 4.9799919 | 4.914022459  | -0.352108471 | -0.352108471 | -0.352108471 |
| 140710 | -0.352108471 | -0.352108 | -0.352108471 | 3.782132804  | 2.124237496  | 0.466342188  |

|        |              |           |              |              |              |              |
|--------|--------------|-----------|--------------|--------------|--------------|--------------|
| 140711 | -0.306239829 | 1.8802386 | 4.066716964  | 5.683164102  | -0.031919049 | 2.825622527  |
| 140739 | 6.090808341  | 4.2703392 | 7.91127753   | -0.352108471 | -0.352108471 | -0.352108471 |
| 140775 | 7.743278113  | 7.9408287 | 7.545727567  | 6.608518847  | 6.987922423  | 6.229115271  |
| 140801 | -0.352108471 | -0.352108 | -0.352108471 | 5.222956311  | 5.191222747  | 5.254689875  |
| 140803 | 6.726177317  | 6.1183043 | 7.334050331  | 5.074415874  | 3.16927636   | 4.121846117  |
| 140809 | 5.284974356  | 4.6832997 | 5.886648965  | -0.352108471 | -0.352108471 | -0.352108471 |
| 140823 | -0.352108471 | -0.352108 | -0.352108471 | 6.479260377  | 6.497336045  | 6.461184708  |
| 140883 | 5.334561398  | 5.6884362 | 6.042311058  | 0.440372779  | 0.440372779  | 0.440372779  |
| 140885 | 6.502263028  | 5.7295947 | 7.27493133   | 9.11829842   | 7.087030751  | 5.055763083  |
| 140890 | 6.400592293  | 6.7737408 | 7.146889267  | -0.352108471 | -0.352108471 | -0.352108471 |
| 140901 | -0.352108471 | -0.352108 | -0.352108471 | 7.494097175  | 6.266367194  | 5.038637212  |
| 140947 | -0.352108471 | -0.352108 | -0.352108471 | 5.663737322  | 5.665786693  | 5.661687951  |
| 142678 | 6.415928975  | 7.1261077 | 5.705750269  | -0.352108471 | -0.352108471 | -0.352108471 |
| 142679 | 4.755240115  | 3.7841621 | 5.726318086  | 4.178899946  | 4.245214285  | 4.112585606  |
| 142913 | 5.955089042  | 6.0276148 | 6.100140465  | 1.76984594   | 1.731739118  | 1.807952763  |
| 143241 | 5.824288785  | 5.873346  | 5.775231583  | 1.697414861  | 1.14221151   | 2.252618212  |
| 143244 | 3.194903159  | 6.8851459 | 5.040024535  | 2.387802959  | 2.597822563  | 2.177783356  |
| 143384 | 5.748354287  | 4.7951934 | 6.701515223  | 7.599776093  | 5.73299091   | 3.866205727  |
| 143471 | -0.352108471 | -0.352108 | -0.352108471 | 7.780424202  | 1.975916071  | 4.878170137  |
| 143502 | -0.352108471 | -0.352108 | -0.352108471 | 2.039000386  | 7.981522684  | 5.010261535  |
| 143872 | 5.840951908  | 7.40613   | 6.623540933  | -0.352108471 | -0.352108471 | -0.352108471 |
| 143888 | 7.233640376  | 5.6710216 | 8.796259121  | 6.926801914  | 9.543416538  | 4.310187289  |
| 144097 | -0.352108471 | -0.352108 | -0.352108471 | 6.038453511  | 3.912822889  | 8.164084133  |
| 144108 | 3.127737875  | 3.136327  | 3.119148782  | 4.08236011   | 4.245214285  | 3.919505936  |
| 144195 | 6.550874147  | 6.5688561 | 6.586838152  | 2.281094784  | 3.563765528  | 4.846436272  |
| 144233 | 6.065196634  | 7.0432293 | 5.087164007  | 6.382429697  | 6.969571564  | 5.79528783   |
| 144245 | 5.519415741  | 5.3152588 | 5.723572646  | 2.710182349  | 0.440372779  | 4.979991919  |
| 144348 | 7.233090752  | 5.3444745 | 6.288782637  | 6.415928975  | 8.334763435  | 4.497094514  |
| 144363 | -0.352108471 | -0.352108 | -0.352108471 | 7.255355713  | 6.369156591  | 5.482957468  |
| 144404 | 7.857408401  | 5.8110875 | 9.903729252  | 6.881056107  | 7.354219327  | 7.117637717  |
| 144717 | 9.711076608  | 4.8615727 | 7.286324647  | -0.352108471 | -0.352108471 | -0.352108471 |
| 144776 | 2.51010775   | 5.012156  | 3.761131874  | 0.849500091  | -0.352108471 | 2.051108653  |
| 144817 | 3.154631683  | 6.8796412 | 5.017136436  | 2.929626001  | 5.501488496  | 0.357763505  |
| 145200 | 5.678446034  | 4.2557691 | 7.101122942  | -0.352108471 | -0.352108471 | -0.352108471 |
| 145216 | 4.579618372  | 4.9140225 | 4.245214285  | 0.808855576  | 0.808855576  | 0.808855576  |
| 145389 | -0.352108471 | -0.352108 | -0.352108471 | 5.091385644  | 6.235921161  | 7.380456677  |
| 145438 | 7.065444921  | 6.9268019 | 7.204087928  | 1.954444309  | 1.807952763  | 2.100935855  |
| 145482 | 4.58858854   | 3.2578236 | 5.91935344   | 4.059833757  | 7.490629409  | 5.775231583  |
| 145483 | 1.501017585  | -0.352108 | 3.354143641  | 1.864658285  | 1.997577452  | 1.731739118  |
| 145501 | 6.067920556  | 4.6414507 | 5.354685649  | 5.940426725  | 5.468243785  | 5.704335255  |
| 145567 | -0.352108471 | -0.352108 | -0.352108471 | 3.585121301  | 3.615460478  | 3.554782125  |
| 145624 | 5.152247113  | 3.6399979 | 6.664496376  | -0.352108471 | -0.352108471 | -0.352108471 |
| 145820 | 8.318263603  | 6.9808439 | 5.643424221  | 3.526802152  | 3.331827732  | 3.136853312  |
| 145864 | 2.280956994  | -0.352108 | 4.914022459  | -0.352108471 | -0.352108471 | -0.352108471 |
| 146050 | 5.94941124   | 4.8247903 | 7.074032224  | 9.589949567  | 6.374837172  | 3.159724777  |
| 146059 | 4.538083686  | 6.033597  | 7.529110263  | 0.044132154  | 0.440372779  | -0.352108471 |
| 146177 | 3.134671562  | 0.7584343 | 1.946552907  | 3.203220169  | 2.564345668  | 1.925471168  |

|        |              |           |              |              |              |              |
|--------|--------------|-----------|--------------|--------------|--------------|--------------|
| 146198 | -0.352108471 | -0.352108 | -0.352108471 | 1.968661759  | 1.997577452  | 1.939746065  |
| 146336 | -0.352108471 | -0.352108 | -0.352108471 | 6.186562848  | 6.84173007   | 5.531395627  |
| 146429 | -0.352108471 | -0.352108 | -0.352108471 | 5.287882532  | 2.139844176  | -1.008194181 |
| 146513 | 6.311614365  | 6.6415447 | 6.971475131  | 0.395051519  | -0.352108471 | 1.14221151   |
| 146540 | 6.851596565  | 6.8335853 | 6.842590929  | 5.747319767  | 4.79273235   | 6.701907184  |
| 146547 | 4.947007189  | 5.0454191 | 4.848595312  | -0.352108471 | -0.352108471 | -0.352108471 |
| 146664 | 5.50073427   | 4.6780901 | 5.089412202  | 4.80208491   | 5.99616903   | 3.60800079   |
| 146723 | 4.905873799  | 6.798825  | 3.012922619  | 5.825702225  | 6.927423116  | 4.723981333  |
| 146771 | 5.595499658  | 6.90247   | 4.288529348  | 1.12335747   | 0.808855576  | 1.437859363  |
| 146850 | -0.352108471 | -0.352108 | -0.352108471 | 6.056053999  | 6.038453511  | 6.073654487  |
| 146857 | 4.800484379  | 6.0209415 | 7.24139857   | 3.055408374  | 3.919505936  | 2.191310813  |
| 146909 | 4.677837508  | 6.9720906 | 9.266343627  | 8.068950007  | 4.484680012  | 6.276815009  |
| 146923 | 7.773581937  | 7.3867697 | 7.580175832  | 6.465742382  | 6.764980292  | 7.064218202  |
| 147007 | 6.607377459  | 6.6215439 | 6.593211042  | 0.228373553  | 0.808855576  | -0.352108471 |
| 147081 | 7.396680528  | 6.5596    | 8.23376105   | 3.599727888  | 3.655785158  | 3.627756523  |
| 147166 | 4.072308319  | 5.3191029 | 6.56589752   | 2.383338121  | 1.305230684  | 0.227123247  |
| 147172 | 6.184820943  | 7.5463696 | 4.823272238  | 2.219830878  | 3.587895627  | 4.955960376  |
| 147179 | 3.979545943  | 3.8009207 | 3.622295397  | 3.316275833  | 0.461843501  | 1.889059667  |
| 147339 | 6.831289207  | 8.2580747 | 5.404503681  | 6.270222109  | 4.905740415  | 7.634703803  |
| 147372 | 6.648260902  | 6.479333  | 6.817188811  | 6.283292661  | 6.720696571  | 5.845888751  |
| 147381 | -0.352108471 | -0.352108 | -0.352108471 | 5.658932548  | 6.600867533  | 6.12990004   |
| 147407 | -0.352108471 | -0.352108 | -0.352108471 | 1.964912095  | 2.187132414  | 2.076022254  |
| 147409 | 6.640019393  | 6.6538708 | 6.626167961  | -0.352108471 | -0.352108471 | -0.352108471 |
| 147429 | 5.074091507  | 5.6724599 | 5.373275698  | 5.203525788  | 2.740352399  | 7.666699177  |
| 147650 | 5.411322995  | 6.2945519 | 5.852937462  | -0.352108471 | -0.352108471 | -0.352108471 |
| 147664 | 7.900064474  | 10.478524 | 5.321604731  | 7.547958879  | 6.204236666  | 4.860514453  |
| 147670 | 7.101746133  | 8.6650577 | 7.883401897  | 6.567717306  | 7.183612904  | 5.951821708  |
| 147694 | 9.421995861  | 6.981366  | 8.201680952  | 6.651348031  | 5.281331678  | 8.021364385  |
| 147699 | 5.320563245  | 5.3152588 | 5.325867653  | -0.352108471 | -0.352108471 | -0.352108471 |
| 147700 | -0.352108471 | -0.352108 | -0.352108471 | 2.065292044  | 4.482692559  | -0.352108471 |
| 147710 | 5.708627399  | 7.3307205 | 6.519673958  | -0.352108471 | -0.352108471 | -0.352108471 |
| 147727 | 7.4871992    | 5.3083583 | 9.666040122  | 1.804300246  | 1.731739118  | 1.876861374  |
| 147804 | 3.127737875  | 3.2887997 | 2.966676046  | 7.847425112  | 7.840015574  | 7.843720343  |
| 147912 | -0.352108471 | -0.352108 | -0.352108471 | 2.578370801  | 9.300013642  | 5.939192221  |
| 147945 | 2.803125457  | 5.9583594 | -0.352108471 | -0.352108471 | -0.352108471 | -0.352108471 |
| 147947 | 7.142706794  | 3.5760851 | 10.70932853  | 2.942215415  | 3.270217129  | 2.614213701  |
| 147991 | 0.844169974  | 2.6547897 | 4.465409505  | -0.352108471 | -0.352108471 | -0.352108471 |
| 148014 | -0.352108471 | -0.352108 | -0.352108471 | 5.083930458  | 4.559699198  | 4.035467939  |
| 148022 | 6.134800615  | 4.9987049 | 7.270896306  | -0.352108471 | -0.352108471 | -0.352108471 |
| 148189 | 6.2088898    | 4.9042312 | 3.599572568  | 1.689236102  | 1.668440768  | 1.678838435  |
| 148203 | 8.617557198  | 7.084019  | 5.550480743  | 8.243469871  | 5.214701252  | 6.729085562  |
| 148206 | 6.321182753  | 7.1484892 | 7.975795696  | 8.113774824  | 6.733189133  | 7.423481978  |
| 148213 | 6.956000881  | 8.3624412 | 5.549560577  | 6.00432218   | 6.479332994  | 5.529311366  |
| 148223 | -0.352108471 | -0.352108 | -0.352108471 | 4.570594918  | 3.787204974  | 4.178899946  |
| 148266 | 6.028048365  | 6.4636749 | 6.899301464  | -0.352108471 | -0.352108471 | -0.352108471 |
| 148281 | 5.749402114  | 5.3810435 | 6.117760751  | -0.352108471 | -0.352108471 | -0.352108471 |
| 148304 | -0.352108471 | -0.352108 | -0.352108471 | 1.798779064  | 1.968661759  | 2.138544454  |

|        |              |           |              |              |              |              |
|--------|--------------|-----------|--------------|--------------|--------------|--------------|
| 148327 | -0.352108471 | -0.352108 | -0.352108471 | 5.017136436  | 6.206979421  | 3.82729345   |
| 148345 | 5.017136436  | 7.5844188 | 2.449854073  | -0.352108471 | -0.352108471 | -0.352108471 |
| 148413 | -0.352108471 | -0.352108 | -0.352108471 | 5.404988946  | 2.501526031  | -0.401936885 |
| 148423 | -0.352108471 | -0.352108 | -0.352108471 | 7.676488118  | 6.671874638  | 5.667261159  |
| 148534 | 4.537820104  | 7.7700895 | 1.305550693  | 5.938433002  | 5.669105462  | 6.207760543  |
| 148696 | 5.749402114  | 4.8085145 | 6.690289712  | -0.352108471 | -0.352108471 | -0.352108471 |
| 148709 | 5.601694565  | 4.4826926 | 6.720696571  | 0.975533543  | 0.808855576  | 1.14221151   |
| 148808 | 7.404415956  | 2.5555679 | 4.979991919  | 0.791292145  | 0.440372779  | 1.14221151   |
| 148870 | 5.360267056  | 7.1358985 | 3.584635578  | -0.352108471 | -0.352108471 | -0.352108471 |
| 148932 | 5.800199788  | 5.825168  | 5.775231583  | -0.352108471 | -0.352108471 | -0.352108471 |
| 148979 | -0.352108471 | -0.352108 | -0.352108471 | 4.456886199  | 4.482692559  | 4.43107984   |
| 149013 | -0.352108471 | -0.352108 | -0.352108471 | 5.169157826  | 5.770339486  | 4.567976165  |
| 149018 | 6.02529475   | 5.2250268 | 5.625160771  | -0.352108471 | -0.352108471 | -0.352108471 |
| 149041 | 1.383520155  | -0.352108 | 3.119148782  | 1.995427359  | 2.051108653  | 1.939746065  |
| 149345 | -0.352108471 | -0.352108 | -0.352108471 | 5.325716078  | 3.144733859  | 7.506698297  |
| 149428 | 4.694839979  | 4.8304259 | 4.559254036  | 6.745152057  | 6.880482436  | 6.609821679  |
| 149461 | 2.58480451   | 4.4081831 | 6.231561712  | 1.374300821  | 0.808855576  | 1.939746065  |
| 149466 | 6.994540798  | 5.8217989 | 4.649056906  | 1.429982115  | 2.051108653  | 0.808855576  |
| 149483 | 3.51606145   | 7.3407263 | 5.428393874  | -0.352108471 | -0.352108471 | -0.352108471 |
| 149499 | 4.847368759  | 3.9195059 | 5.775231583  | -0.352108471 | -0.352108471 | -0.352108471 |
| 149603 | -0.352108471 | -0.352108 | -0.352108471 | 4.404434355  | 8.464855162  | 6.434644758  |
| 149620 | 5.284974356  | 5.4023386 | 5.167610084  | 0.228373553  | 0.808855576  | -0.352108471 |
| 149992 | 6.974267616  | 7.1980192 | 7.421770869  | 2.064739793  | 2.252618212  | 1.876861374  |
| 150084 | -0.352108471 | -0.352108 | -0.352108471 | 5.958359385  | 4.884439554  | 7.032279215  |
| 150159 | -0.352108471 | -0.352108 | -0.352108471 | 2.38621749   | 5.124543452  | -0.352108471 |
| 150223 | -0.352108471 | -0.352108 | -0.352108471 | 5.165235283  | 2.575878933  | 3.870557108  |
| 150244 | 4.886860718  | 4.7306158 | 4.574370823  | 4.780236561  | 3.963449484  | 5.597023638  |
| 150274 | 6.619197037  | 4.6913033 | 8.547090744  | 0.95025487   | -0.352108471 | 2.252618212  |
| 150291 | -0.352108471 | -0.352108 | -0.352108471 | 5.255958484  | 5.393523004  | 5.531087525  |
| 150353 | -0.352108471 | -0.352108 | -0.352108471 | 5.541320776  | 5.588224375  | 5.494417177  |
| 150368 | 7.052977603  | 6.2952802 | 6.674128879  | -0.352108471 | -0.352108471 | -0.352108471 |
| 150381 | 6.056053999  | 7.5810502 | 4.531057775  | -0.352108471 | -0.352108471 | -0.352108471 |
| 150465 | 7.886413181  | 4.3566444 | 6.121528769  | 5.284974356  | 6.317532563  | 4.25241615   |
| 150468 | -0.352108471 | -0.352108 | -0.352108471 | 6.799187547  | 6.204656258  | 5.610124969  |
| 150572 | -0.352108471 | -0.352108 | -0.352108471 | 6.591990649  | 5.688622647  | 4.785254645  |
| 150622 | 4.624859933  | 5.2312478 | 4.018472052  | 1.568700478  | 3.524550744  | 2.546625611  |
| 150677 | 9.036665081  | 3.0392981 | 6.03798158   | -0.352108471 | -0.352108471 | -0.352108471 |
| 150696 | 4.406199352  | 4.3158285 | 4.496570221  | 3.635664202  | 5.284336357  | 6.933008513  |
| 150759 | 7.288294839  | 7.1689345 | 7.407655215  | 4.188896228  | 2.100935855  | 6.276856601  |
| 150864 | 6.454033016  | 7.5997155 | 5.308350525  | 3.676368992  | 3.542556211  | 3.810181774  |
| 150921 | 6.055676819  | 6.4333187 | 6.810960637  | -0.352108471 | -0.352108471 | -0.352108471 |
| 150935 | 2.103572783  | -0.229174 | 4.436319997  | 2.553073296  | 3.041952253  | 2.06419434   |
| 150962 | 5.493783215  | 3.4066297 | 7.580936746  | -0.352108471 | -0.352108471 | -0.352108471 |
| 151009 | 6.556689902  | 7.8278522 | 5.285527604  | 3.166717128  | 5.631148531  | 0.702285726  |
| 151056 | -0.352108471 | -0.352108 | -0.352108471 | 6.64789689   | 6.674249904  | 6.621543876  |
| 151121 | 5.284974356  | 5.3152588 | 5.254689875  | -0.352108471 | -0.352108471 | -0.352108471 |
| 151174 | -0.352108471 | -0.352108 | -0.352108471 | 4.66005769   | 4.688318557  | 4.631796822  |



|        |              |           |              |              |              |              |
|--------|--------------|-----------|--------------|--------------|--------------|--------------|
| 151194 | 8.118093872  | 7.3233064 | 6.52851883   | 7.02826092   | 6.986144846  | 7.007202883  |
| 151234 | 5.478536194  | 5.680265  | 5.276807358  | -0.352108471 | -0.352108471 | -0.352108471 |
| 151246 | 6.016188175  | 6.5314763 | 6.273832259  | 2.579251289  | 3.497013509  | 4.414775729  |
| 151258 | 4.702869762  | 5.2647065 | 5.826543237  | -0.352108471 | -0.352108471 | -0.352108471 |
| 151306 | 2.777872975  | 6.8067344 | 4.792303669  | -0.352108471 | -0.352108471 | -0.352108471 |
| 151354 | 8.526500833  | 5.8001998 | 3.073898742  | 5.958359385  | 5.311201928  | 6.605516841  |
| 151475 | 7.451903952  | 9.4148928 | 5.488915059  | 1.483450039  | 4.24400866   | 2.863729349  |
| 151477 | 4.680131247  | 3.1277379 | 1.575344504  | 1.90117116   | 1.549724107  | 2.252618212  |
| 151636 | 9.168791693  | 8.06044   | 6.952088238  | 7.312834771  | 9.003450504  | 5.622219039  |
| 151887 | -0.352108471 | -0.352108 | -0.352108471 | 4.668754626  | 7.604813664  | 10.5408727   |
| 151963 | -0.352108471 | -0.352108 | -0.352108471 | 5.770362668  | 5.825167992  | 5.715557343  |
| 152002 | -0.352108471 | -0.352108 | -0.352108471 | 4.178899946  | 3.11672189   | 5.241078001  |
| 152006 | -0.352108471 | -0.352108 | -0.352108471 | 3.119148782  | 3.119148782  | 3.119148782  |
| 152007 | -0.352108471 | -0.352108 | -0.352108471 | 2.252618212  | 3.878445392  | 0.626791031  |
| 152098 | 2.201036472  | 4.7541814 | -0.352108471 | 1.383520155  | 3.119148782  | -0.352108471 |
| 152137 | -0.352108471 | -0.352108 | -0.352108471 | 3.612309474  | 5.820804688  | 4.716557081  |
| 152217 | -0.352108471 | -0.352108 | -0.352108471 | 6.866733042  | 7.039536769  | 6.693929315  |
| 152404 | 5.518872571  | 6.5373837 | 7.555894878  | -0.352108471 | -0.352108471 | -0.352108471 |
| 152485 | 4.878665478  | 3.9914912 | 5.765839755  | 9.563901774  | 2.283084591  | 5.923493182  |
| 152503 | -0.352108471 | -0.352108 | -0.352108471 | 5.090388781  | 5.55876787   | 6.027146959  |
| 152519 | 6.519972795  | 6.4919329 | 6.54801273   | 4.573177085  | 4.245214285  | 4.901139884  |
| 152579 | -0.352108471 | -0.352108 | -0.352108471 | 8.995722529  | 6.396868383  | 3.798014236  |
| 152641 | 6.537383725  | 7.5683905 | 5.506376915  | -0.352108471 | -0.352108471 | -0.352108471 |
| 152789 | 4.879008692  | 6.4335704 | 5.656289537  | -0.352108471 | -0.352108471 | -0.352108471 |
| 152815 | 4.290620593  | 8.2903468 | 6.290483708  | 1.086055948  | 0.440372779  | 1.731739118  |
| 152831 | 8.116665574  | 7.7702435 | 7.423821417  | 6.356491455  | 6.588093743  | 6.819696032  |
| 152926 | 3.820316761  | 1.7836987 | -0.252919296 | 1.78645205   | 1.169942663  | 1.478197356  |
| 153090 | 5.550348507  | 5.5671872 | 5.55876787   | -0.352108471 | -0.352108471 | -0.352108471 |
| 153201 | 7.681185484  | 7.1666034 | 6.652021359  | 5.180588559  | 7.816964612  | 6.498776586  |
| 153222 | 5.939192221  | 6.0983361 | 5.780048381  | 6.49815925   | 6.204656258  | 5.911153266  |
| 153339 | -0.352108471 | -0.352108 | -0.352108471 | 7.501937604  | 4.120009949  | 5.810973776  |
| 153478 | 5.767649218  | 7.7448453 | 6.756247253  | 5.554237038  | 7.901415066  | 6.727826052  |
| 153527 | 4.434314669  | 4.4826926 | 4.385936778  | 4.977710418  | 5.054280952  | 4.901139884  |
| 153562 | 5.579960479  | 7.09719   | 6.338575234  | 0.624614178  | 0.440372779  | 0.808855576  |
| 153642 | 6.877873345  | 6.8584729 | 6.868173108  | 0.542875446  | -0.352108471 | 1.437859363  |
| 153684 | 6.623540933  | 6.6538708 | 6.593211042  | -0.352108471 | -0.352108471 | -0.352108471 |
| 153830 | -0.352108471 | -0.352108 | -0.352108471 | 6.301401509  | 5.052267685  | 3.803133862  |
| 153918 | -0.352108471 | -0.352108 | -0.352108471 | 3.818577921  | 2.451290702  | 1.084003484  |
| 154043 | 3.127737875  | 3.136327  | 3.119148782  | 6.330004048  | 6.383151496  | 6.276856601  |
| 154141 | 7.567747     | 7.1689345 | 7.966559536  | 6.810436227  | 6.720696571  | 6.900175883  |
| 154150 | 4.731111372  | 4.8304259 | 4.631796822  | -0.352108471 | -0.352108471 | -0.352108471 |
| 154215 | -0.352108471 | -0.352108 | -0.352108471 | 4.6888805    | 3.919505936  | 5.458255064  |
| 154664 | 3.682181533  | 4.4314288 | 2.932934247  | 2.943999871  | 3.228124277  | 3.086062074  |
| 154761 | 6.735779686  | 4.5730519 | 8.898507441  | 0.044132154  | 0.440372779  | -0.352108471 |
| 154791 | 6.236695219  | 5.3783539 | 7.095036499  | 7.106495446  | 5.607376822  | 4.108258198  |
| 154796 | 6.954346295  | 7.1053136 | 6.803378955  | 4.913453562  | 7.832520937  | 6.372987249  |
| 154807 | 5.555777437  | 4.6490074 | 6.462547521  | 6.699412027  | 4.013532912  | 5.35647247   |

|        |              |           |              |              |              |              |
|--------|--------------|-----------|--------------|--------------|--------------|--------------|
| 154881 | -0.352108471 | -0.352108 | -0.352108471 | 3.988552347  | 3.725166081  | 3.461779814  |
| 155006 | 6.201853743  | 5.0218469 | 5.611850338  | 6.257154943  | 5.142321764  | 4.027488586  |
| 155054 | -0.352108471 | -0.352108 | -0.352108471 | 3.699359721  | 4.245214285  | 3.153505157  |
| 155066 | -0.352108471 | -0.352108 | -0.352108471 | 1.879468461  | 5.95954341   | 3.919505936  |
| 155185 | 7.893365184  | 7.5180418 | 7.142718369  | 0.044132154  | -0.352108471 | 0.440372779  |
| 155400 | -0.352108471 | -0.352108 | -0.352108471 | 3.090828498  | 6.229286881  | 4.66005769   |
| 155435 | -0.352108471 | -0.352108 | -0.352108471 | 6.192795461  | 5.169157826  | 4.14552019   |
| 157247 | 6.325912701  | 11.362795 | 8.844353864  | 7.768793458  | 7.795411926  | 7.74217499   |
| 157273 | 7.258571938  | 8.519519  | 7.889045476  | 2.097698605  | 4.523055044  | 6.948411483  |
| 157285 | 6.582680225  | 6.0718659 | 5.561051563  | -0.352108471 | -0.352108471 | -0.352108471 |
| 157381 | 4.904231184  | 5.5240469 | 4.284415506  | 0.791292145  | 0.440372779  | 1.14221151   |
| 157506 | 7.237411851  | 7.5532206 | 6.921603065  | 6.555262436  | 7.369100357  | 5.741424516  |
| 157657 | 5.079912626  | 5.0843562 | 5.088799708  | 1.873707872  | 1.646479888  | 2.100935855  |
| 157693 | 6.674128879  | 4.3880633 | 8.960194414  | -0.352108471 | -0.352108471 | -0.352108471 |
| 157769 | 5.719564994  | 5.7155573 | 5.723572646  | 4.456886199  | 4.482692559  | 4.43107984   |
| 157777 | 6.556908606  | 6.9786128 | 6.135204448  | 1.227667732  | 0.808855576  | 1.646479888  |
| 157869 | 9.498378266  | 1.773305  | 5.635841639  | -0.352108471 | -0.352108471 | -0.352108471 |
| 157922 | 6.288510867  | 4.0206929 | 8.556328861  | 6.581341534  | 6.637744513  | 6.609543024  |
| 157983 | 4.819798327  | 8.184897  | 6.502347686  | 4.974100742  | 7.141919785  | 6.058010264  |
| 158046 | 3.080305375  | 8.0676534 | 5.573979364  | -0.449453392 | 3.546225348  | 7.541904089  |
| 158055 | -0.352108471 | -0.352108 | -0.352108471 | 5.233567424  | 4.01862044   | 6.448514407  |
| 158056 | -0.352108471 | -0.352108 | -0.352108471 | 0.95025487   | 2.252618212  | -0.352108471 |
| 158067 | 5.657577612  | 3.2679932 | 8.047161978  | 2.587713284  | 4.245214285  | 0.930212283  |
| 158135 | -0.352108471 | -0.352108 | -0.352108471 | 3.859689372  | 2.19005738   | 0.520425389  |
| 158158 | 7.341995514  | 6.5634192 | 6.952707338  | -0.352108471 | -0.352108471 | -0.352108471 |
| 158234 | 6.978516816  | 6.0966267 | 6.537571752  | 2.76826138   | 8.107722042  | 5.437991711  |
| 158314 | -0.352108471 | -0.352108 | -0.352108471 | 4.907213164  | 5.080554094  | 5.253895024  |
| 158326 | 2.162429289  | 8.9551065 | 5.55876787   | -0.352108471 | -0.352108471 | -0.352108471 |
| 158358 | 8.57691103   | 2.5406247 | 5.55876787   | 6.318987861  | 7.274641898  | 6.796814879  |
| 158399 | 6.692425927  | 7.6038948 | 5.780957025  | 6.769641641  | 7.721399865  | 5.817883416  |
| 158401 | -0.352108471 | -0.352108 | -0.352108471 | 3.919505936  | 3.528926197  | 4.310085674  |
| 158405 | 6.212536209  | 8.0296933 | 4.395379098  | 1.999631788  | 1.931214528  | 2.068049048  |
| 158435 | 6.257523222  | 5.4610651 | 7.053981388  | 2.881537061  | 4.954218546  | 0.808855576  |
| 158696 | 6.110613973  | 6.3737167 | 5.847511245  | 9.015971147  | 4.548116978  | 6.782044062  |
| 158724 | -0.352108471 | -0.352108 | -0.352108471 | 5.021244133  | 7.810613816  | 6.415928975  |
| 158866 | 4.812291254  | 6.7335249 | 5.772908066  | 2.419080028  | 1.916337486  | 1.413594945  |
| 158931 | -0.352108471 | -0.352108 | -0.352108471 | 6.039651413  | 7.837119555  | 4.242183271  |
| 159013 | 4.730615771  | 6.5856878 | 2.87554372   | 3.585651366  | 2.191310813  | 4.979991919  |
| 159090 | -0.352108471 | -0.352108 | -0.352108471 | 8.091794594  | 10.17697388  | 6.00661531   |
| 159195 | 6.762783932  | 7.4239334 | 6.101634422  | 5.67944993   | 5.665786693  | 5.693113166  |
| 160287 | 7.678111331  | 5.3546856 | 3.031259967  | -0.352108471 | -0.352108471 | -0.352108471 |
| 160428 | 6.867473012  | 6.5884653 | 7.146480757  | 1.995427359  | 2.051108653  | 1.939746065  |
| 160518 | 6.150905078  | 6.1079622 | 6.193847962  | 5.338134843  | 5.421579811  | 5.254689875  |
| 160760 | -0.352108471 | -0.352108 | -0.352108471 | 2.069354904  | 2.933697157  | 2.501526031  |
| 160857 | 7.412792659  | 7.1881098 | 7.637475505  | 7.170749369  | 6.773846551  | 7.567652187  |
| 160897 | -0.352108471 | -0.352108 | -0.352108471 | 5.412561087  | 5.421579811  | 5.403542364  |
| 161142 | -0.352108471 | -0.352108 | -0.352108471 | 4.520091556  | 6.251034844  | 7.981978131  |

|        |              |           |              |              |              |              |
|--------|--------------|-----------|--------------|--------------|--------------|--------------|
| 161145 | 5.805829598  | 7.3184208 | 4.293238376  | -0.352108471 | -0.352108471 | -0.352108471 |
| 161291 | -0.352108471 | -0.352108 | -0.352108471 | 0.947967741  | 2.124237496  | 3.300507251  |
| 161357 | 7.988338592  | 4.495758  | 6.242048279  | -0.352108471 | -0.352108471 | -0.352108471 |
| 161424 | 4.523354777  | 6.3691566 | 8.214958404  | 1.707893654  | 2.630956295  | 2.169424975  |
| 161635 | 5.734392038  | 4.0180573 | 7.450726788  | -0.352108471 | -0.352108471 | -0.352108471 |
| 161742 | 8.906589873  | 5.7207288 | 7.31365934   | 5.598405697  | 4.41206724   | 6.784744154  |
| 161779 | -0.352108471 | -0.352108 | -0.352108471 | 3.916845328  | 6.421470323  | 5.169157826  |
| 161823 | -0.352108471 | -0.352108 | -0.352108471 | 2.024343053  | 2.051108653  | 1.997577452  |
| 161829 | 7.145882028  | 6.614467  | 7.677297084  | 8.199529303  | 6.602203591  | 5.004877879  |
| 161882 | 6.038453511  | 4.3955272 | 7.681379817  | -0.352108471 | -0.352108471 | -0.352108471 |
| 162073 | 7.051611387  | 8.0255579 | 6.077664882  | 5.877005427  | 5.00695276   | 6.747058095  |
| 162239 | 6.690051919  | 5.6251608 | 4.560269624  | 4.626464242  | 5.958359385  | 7.290254527  |
| 162282 | 5.108579594  | 6.6399616 | 8.171343586  | -0.352108471 | -0.352108471 | -0.352108471 |
| 162427 | 5.287855205  | 4.9140225 | 5.661687951  | 2.281847319  | 1.876861374  | 2.686833264  |
| 162963 | 5.727797845  | 5.9002924 | 6.072786916  | -0.352108471 | -0.352108471 | -0.352108471 |
| 162967 | 8.534281946  | 2.8226101 | 5.678446034  | 2.118278685  | 1.057471689  | 3.179085681  |
| 162968 | -0.352108471 | -0.352108 | -0.352108471 | 4.80208491   | 6.745348393  | 2.858821427  |
| 162972 | 6.875766365  | 6.8194234 | 6.847594901  | 5.363386034  | 8.151029767  | 2.575742301  |
| 162989 | 6.493400374  | 5.7752316 | 5.057062792  | -0.352108471 | -0.352108471 | -0.352108471 |
| 162998 | 5.386853672  | 7.5709185 | 9.754983296  | 6.307069424  | 4.884089374  | 7.730049475  |
| 163033 | 6.984591889  | 7.7034158 | 7.344003864  | -0.352108471 | -0.352108471 | -0.352108471 |
| 163049 | 4.914022459  | 4.9086178 | 4.919427076  | 8.262569965  | 4.40533195   | 6.333950958  |
| 163051 | 6.87819102   | 3.3402747 | 5.109232857  | 2.493184469  | 5.586906204  | 8.680627938  |
| 163059 | -0.352108471 | -0.352108 | -0.352108471 | 2.544098373  | 2.439966475  | 2.492032424  |
| 163071 | 7.619806991  | 6.6885154 | 5.757223771  | 5.289214314  | 6.4387435    | 7.588272686  |
| 163087 | 7.509248289  | 6.6182187 | 5.727189027  | 2.221587275  | 2.179939357  | 2.13829144   |
| 163126 | -0.352108471 | -0.352108 | -0.352108471 | 3.008569927  | 3.482681784  | 3.245625856  |
| 163175 | -0.352108471 | -0.352108 | -0.352108471 | 2.958488302  | 0.934617512  | 1.946552907  |
| 163227 | 4.639213866  | 5.681728  | 6.724242091  | 1.835742592  | 1.731739118  | 1.939746065  |
| 163351 | 3.915406297  | 8.3729661 | 6.144186222  | 6.368888508  | 6.33538923   | 6.402387785  |
| 163479 | -0.352108471 | -0.352108 | -0.352108471 | 1.968661759  | 1.997577452  | 1.939746065  |
| 163590 | 9.667052281  | 9.5187163 | 9.815388235  | 8.610885543  | 8.817423118  | 8.404347968  |
| 163732 | 5.413052115  | 6.4636749 | 7.514297714  | -0.352108471 | -0.352108471 | -0.352108471 |
| 163859 | 6.353573297  | 4.3137621 | 8.393384512  | 6.548894265  | 6.979571411  | 6.764232838  |
| 163933 | 4.316673712  | 5.8529375 | 7.389201212  | -0.352108471 | -0.352108471 | -0.352108471 |
| 164091 | 4.438054711  | 9.3194704 | 6.878762534  | 6.589897504  | 6.038453511  | 5.487009518  |
| 164656 | 5.575517823  | 6.4495955 | 4.701440103  | -0.352108471 | -0.352108471 | -0.352108471 |
| 165215 | 3.140571014  | 5.8476283 | 8.554685627  | 6.931936377  | 6.188466951  | 7.675405804  |
| 165324 | 5.856153166  | 4.5909914 | 5.223572287  | -0.352108471 | -0.352108471 | -0.352108471 |
| 165631 | 4.792303669  | 3.6298793 | 5.954728031  | -0.352108471 | -0.352108471 | -0.352108471 |
| 165918 | 1.866037237  | 6.167134  | 4.01658562   | -0.352108471 | -0.352108471 | -0.352108471 |
| 166348 | 7.861969562  | 7.845843  | 7.829716523  | 6.939394323  | 8.232170041  | 5.646618606  |
| 166614 | 6.831289207  | 8.0675907 | 5.594987685  | -0.352108471 | -0.352108471 | -0.352108471 |
| 166785 | 6.183964016  | 6.1999612 | 6.167966808  | -0.352108471 | -0.352108471 | -0.352108471 |
| 166863 | -0.352108471 | -0.352108 | -0.352108471 | 4.783927893  | 4.80208491   | 4.820241928  |
| 166979 | 1.816709515  | 3.663711  | 2.740210233  | -0.352108471 | -0.352108471 | -0.352108471 |
| 167465 | 3.739479841  | 6.3655266 | 5.052503221  | 8.140519457  | 6.847035404  | 5.553551352  |

|        |              |           |              |              |              |              |
|--------|--------------|-----------|--------------|--------------|--------------|--------------|
| 167681 | 6.199595632  | 4.532658  | 7.866533263  | -0.352108471 | -0.352108471 | -0.352108471 |
| 168374 | 2.515697587  | 5.3024132 | -0.27101804  | -0.352108471 | -0.352108471 | -0.352108471 |
| 168448 | 9.129930389  | 4.0517459 | 6.590838154  | 5.17630952   | 4.67635013   | 4.926329825  |
| 168451 | 8.08779652   | 3.3668546 | 5.727325549  | 3.703134593  | 1.587843812  | 5.818425374  |
| 168455 | -0.352108471 | -0.352108 | -0.352108471 | 5.835528372  | 3.272373272  | 8.398683471  |
| 168507 | -0.352108471 | -0.352108 | -0.352108471 | 2.076022254  | 2.100935855  | 2.051108653  |
| 168850 | -0.352108471 | -0.352108 | -0.352108471 | 6.754140297  | 5.357967701  | 6.056053999  |
| 169355 | 6.112592537  | 4.4573562 | 5.284974356  | -0.352108471 | -0.352108471 | -0.352108471 |
| 169436 | 6.899497233  | 5.9326023 | 7.866392188  | -0.352108471 | -0.352108471 | -0.352108471 |
| 169522 | -0.352108471 | -0.352108 | -0.352108471 | 5.369332089  | 2.938996888  | 7.799667289  |
| 169611 | 5.090461483  | 7.4989785 | 6.294719976  | 1.640731613  | 1.731739118  | 1.549724107  |
| 169714 | -0.352108471 | -0.352108 | -0.352108471 | 2.19005738   | 2.232575625  | 2.147539136  |
| 169792 | -0.352108471 | -0.352108 | -0.352108471 | 5.190180163  | 6.396868383  | 7.603556602  |
| 170062 | -0.352108471 | -0.352108 | -0.352108471 | 5.017136436  | 4.095043541  | 5.93922933   |
| 170384 | -0.352108471 | -0.352108 | -0.352108471 | 7.689309429  | 6.104429468  | 4.519549506  |
| 170394 | 5.304221134  | 6.5741633 | 5.939192221  | 4.508316383  | 5.095423988  | 5.682531593  |
| 170463 | 7.360780676  | 8.7198802 | 6.001681123  | 7.364389464  | 6.25544224   | 8.473336688  |
| 170575 | 5.140821053  | 6.4858568 | 5.813338943  | 3.104255198  | 4.692649193  | 6.281043187  |
| 170591 | 4.401354803  | 6.9629664 | 5.682160582  | -0.352108471 | -0.352108471 | -0.352108471 |
| 170622 | -0.352108471 | -0.352108 | -0.352108471 | 7.075027314  | 6.847035404  | 6.619043495  |
| 170685 | -0.352108471 | -0.352108 | -0.352108471 | 6.139508822  | 5.393523004  | 4.647537187  |
| 170689 | 2.62245663   | 0.7439189 | 4.500994336  | 0.95025487   | 2.252618212  | -0.352108471 |
| 170691 | 7.193586113  | 7.0919708 | 7.29520141   | 1.437859363  | 1.437859363  | 1.437859363  |
| 170954 | 6.335199306  | 5.3546856 | 4.374171992  | 5.967566423  | 5.233567424  | 4.499568424  |
| 170958 | 1.783698732  | 3.9195059 | -0.352108471 | 2.553073296  | 5.458255064  | -0.352108471 |
| 170959 | 4.983925974  | 6.1121944 | 3.855657502  | 1.05704313   | 0.808855576  | 1.305230684  |
| 170960 | 4.125736893  | 2.9239264 | 1.722115859  | 5.102762726  | 6.068683866  | 5.585723296  |
| 171017 | -0.352108471 | -0.352108 | -0.352108471 | 5.412561087  | 4.377562188  | 6.447559987  |
| 171023 | 5.90029238   | 3.290601  | 8.509983786  | 7.242526124  | 5.55876787   | 3.875009616  |
| 171024 | -0.352108471 | -0.352108 | -0.352108471 | 2.024343053  | 2.051108653  | 1.997577452  |
| 171220 | 3.918308276  | 5.1227518 | 6.327195423  | 1.653454619  | 1.290035436  | 0.926616254  |
| 171484 | -0.352108471 | -0.352108 | -0.352108471 | 2.481575183  | -0.352108471 | 5.315258837  |
| 171546 | 7.115577709  | 6.4818442 | 6.798710977  | 1.995427359  | 2.051108653  | 1.939746065  |
| 171586 | -0.352108471 | -0.352108 | -0.352108471 | 4.225500254  | 5.017136436  | 5.808772617  |
| 192111 | 8.192691989  | 8.3501449 | 8.035239038  | 5.594834376  | 5.731413688  | 5.458255064  |
| 192134 | 8.09705323   | 7.4321811 | 7.764617143  | 3.012289909  | 3.337746555  | 2.686833264  |
| 192286 | 6.463674915  | 6.479333  | 6.448016836  | 6.786143201  | 6.813225323  | 6.759061079  |
| 192668 | 5.688622647  | 5.041865  | 6.335380327  | 4.178899946  | 2.192875082  | 6.16492481   |
| 192669 | -0.352108471 | -0.352108 | -0.352108471 | 2.252618212  | 3.96848257   | 0.536753853  |
| 195827 | -0.352108471 | -0.352108 | -0.352108471 | 3.553766553  | 4.353101604  | 3.953434078  |
| 196047 | 10.05330911  | 7.9252296 | 8.989269339  | 7.135075351  | 8.587597945  | 5.682552757  |
| 196074 | -0.352108471 | -0.352108 | -0.352108471 | 6.039651413  | 6.073654487  | 6.005648339  |
| 196264 | 6.221869239  | 5.1370351 | 7.306703386  | 6.150814957  | 3.967265593  | 8.334364321  |
| 196294 | 6.607377459  | 7.2456794 | 5.969075484  | 0.044132154  | 0.440372779  | -0.352108471 |
| 196383 | 6.224862874  | 6.2436502 | 6.206075575  | -0.352108471 | -0.352108471 | -0.352108471 |
| 196403 | 5.066569165  | 4.9042312 | 4.741893203  | -0.352108471 | -0.352108471 | -0.352108471 |
| 196415 | -0.352108471 | -0.352108 | -0.352108471 | 4.557244691  | 5.079549824  | 4.034939558  |

|        |              |           |              |              |              |              |
|--------|--------------|-----------|--------------|--------------|--------------|--------------|
| 196441 | -0.352108471 | -0.352108 | -0.352108471 | 3.964067715  | 4.66005769   | 5.356047664  |
| 196463 | 1.832656838  | 4.7311114 | 7.629565907  | 5.373155485  | 4.231215835  | 6.515095135  |
| 196483 | -0.352108471 | -0.352108 | -0.352108471 | 1.631676003  | 3.615460478  | -0.352108471 |
| 196527 | -0.352108471 | -0.352108 | -0.352108471 | 1.954444309  | 1.807952763  | 2.100935855  |
| 196740 | 7.119744898  | 7.4217343 | 7.723723711  | -0.167816955 | 1.689109503  | 3.546035961  |
| 196883 | 6.068499534  | 4.976069  | 5.522284255  | -0.352108471 | -0.352108471 | -0.352108471 |
| 196968 | 6.032792961  | 5.0894122 | 4.146031442  | 1.179289842  | 0.808855576  | 1.549724107  |
| 197021 | 2.15990226   | 4.671913  | -0.352108471 | 4.840642371  | 5.959771619  | 7.078900868  |
| 197131 | 5.023982941  | 6.3532624 | 5.688622647  | -0.352108471 | -0.352108471 | -0.352108471 |
| 197135 | -0.352108471 | -0.352108 | -0.352108471 | 3.241094247  | 2.051108653  | 4.43107984   |
| 197196 | 5.269218467  | 7.1805073 | 6.224862874  | 3.988831276  | 4.900032819  | 5.811234362  |
| 197358 | 9.492532054  | 6.9442237 | 4.395915248  | 7.045895639  | 6.991300859  | 7.100490419  |
| 197370 | 7.382956475  | 5.7341724 | 4.085388274  | -0.352108471 | -0.352108471 | -0.352108471 |
| 199223 | 5.00982419   | 6.1215288 | 7.233233348  | -0.352108471 | -0.352108471 | -0.352108471 |
| 199699 | 8.604899524  | 7.3999659 | 6.195032352  | 7.705342059  | 5.761754088  | 6.733548073  |
| 199704 | -0.352108471 | -0.352108 | -0.352108471 | 6.019409619  | 6.073654487  | 5.965164752  |
| 199745 | -0.352108471 | -0.352108 | -0.352108471 | 3.245625856  | 3.337746555  | 3.153505157  |
| 199746 | 4.615387423  | 5.8824943 | 7.149601117  | 3.500810671  | 5.892148037  | 8.283485403  |
| 199777 | 5.664088163  | 5.3387163 | 5.989460026  | 1.825329981  | 2.265129821  | 1.385530142  |
| 199800 | 4.273206125  | 6.8443296 | 5.55876787   | -0.352108471 | -0.352108471 | -0.352108471 |
| 199870 | 3.127737875  | 0.4549993 | 5.800476446  | 6.164724575  | 6.175335611  | 6.170030093  |
| 199899 | 3.600481751  | 0.6653328 | 2.132907287  | 3.235175761  | 2.520455855  | 2.877815808  |
| 199990 | -0.352108471 | -0.352108 | -0.352108471 | 6.410170138  | 3.847357133  | 5.128763636  |
| 200010 | 6.637888669  | 6.9003701 | 6.375407279  | -0.352108471 | -0.352108471 | -0.352108471 |
| 200030 | -0.352108471 | -0.352108 | -0.352108471 | 6.234949724  | 3.585121301  | 0.935292878  |
| 200058 | -0.352108471 | -0.352108 | -0.352108471 | 6.415928975  | 7.336154076  | 5.495703874  |
| 200081 | -0.352108471 | -0.352108 | -0.352108471 | 7.030577409  | 7.188109812  | 6.873045007  |
| 200150 | -0.352108471 | -0.352108 | -0.352108471 | 0.998561388  | 2.168105043  | 3.337648697  |
| 200162 | 5.876952844  | 6.8183689 | 4.93553678   | 5.983736712  | 5.52941672   | 6.438056703  |
| 200185 | 5.673266141  | 7.5414888 | 6.607377459  | 4.145042328  | 5.789762726  | 7.434483124  |
| 200197 | -0.352108471 | -0.352108 | -0.352108471 | 5.409444926  | 7.26094789   | 6.335196408  |
| 200315 | 6.794186972  | 8.7005759 | 7.747381455  | 8.368204667  | 7.228052884  | 6.0879011    |
| 200316 | 3.41407487   | 4.8822675 | 1.94588227   | 5.395886994  | 3.615867194  | 1.835847393  |
| 200539 | 6.640019393  | 6.6538708 | 6.626167961  | -0.352108471 | -0.352108471 | -0.352108471 |
| 200558 | 6.384848847  | 6.2800845 | 6.332466669  | -0.352108471 | -0.352108471 | -0.352108471 |
| 200576 | 5.639975304  | 6.9695558 | 4.310394757  | 6.166112602  | 4.237555116  | 5.201833859  |
| 200734 | -0.352108471 | -0.352108 | -0.352108471 | 7.551136183  | 7.801394858  | 7.300877508  |
| 200765 | 6.524020149  | 7.1912022 | 6.857611197  | 7.394837442  | 6.806019973  | 7.100428707  |
| 200879 | 6.969681275  | 7.9927758 | 5.946586714  | 4.275651379  | 7.506073575  | 1.045229183  |
| 200916 | 7.504511108  | 7.5506489 | 7.458373336  | 7.344860083  | 7.361907759  | 7.327812407  |
| 200933 | 9.509257301  | 7.0733449 | 8.291301101  | 7.855359013  | 7.128044171  | 6.400729329  |
| 201161 | 4.368112127  | 5.7494021 | 7.130692101  | -0.352108471 | -0.352108471 | -0.352108471 |
| 201163 | 7.8724194    | 6.7895548 | 5.706690245  | 3.883156074  | 5.971467073  | 1.794845074  |
| 201164 | 8.1436829    | 5.7545997 | 6.949141282  | 1.345967809  | 1.14221151   | 1.549724107  |
| 201181 | 8.246814975  | 7.136534  | 9.357095981  | 8.254856327  | 6.62360496   | 7.439230644  |
| 201191 | 7.299569177  | 5.0622456 | 6.180907385  | -0.352108471 | -0.352108471 | -0.352108471 |
| 201254 | 3.085573541  | 5.6251608 | 8.164748002  | 0.044132154  | 0.440372779  | -0.352108471 |

|        |              |           |              |              |              |              |
|--------|--------------|-----------|--------------|--------------|--------------|--------------|
| 201255 | -0.352108471 | -0.352108 | -0.352108471 | 5.458255064  | 4.206331409  | 6.710178719  |
| 201292 | 7.428247301  | 7.6152586 | 7.241236027  | 2.903700168  | 2.252618212  | 3.554782125  |
| 201475 | 6.90161932   | 8.3052319 | 5.498006746  | 3.05504663   | 0.8680033    | 1.961524965  |
| 201477 | -0.352108471 | -0.352108 | -0.352108471 | 5.131838854  | 7.166836847  | 6.149337851  |
| 201595 | 6.47470686   | 6.8227154 | 7.170723976  | 6.267548248  | 6.719517257  | 6.493532752  |
| 201627 | -0.352108471 | -0.352108 | -0.352108471 | 2.937210282  | 6.382905097  | 4.66005769   |
| 201633 | -0.352108471 | -0.352108 | -0.352108471 | 5.417224669  | 5.281537812  | 5.349381241  |
| 201853 | 13.43556854  | 13.778924 | 14.12228029  | 12.56854535  | 13.23753795  | 13.90653055  |
| 201895 | 7.715071783  | 7.474041  | 7.95610257   | 7.692157917  | 7.528756621  | 7.855559213  |
| 201931 | -0.352108471 | -0.352108 | -0.352108471 | 4.703081131  | 7.505777804  | 6.104429468  |
| 201965 | -0.352108471 | -0.352108 | -0.352108471 | 5.095423988  | 5.124543452  | 5.066304524  |
| 202052 | 6.132119415  | 6.9789464 | 7.825773465  | 8.345199752  | 1.674104462  | 5.009652107  |
| 202299 | -0.352108471 | -0.352108 | -0.352108471 | 6.679845279  | 1.929217798  | 4.304531538  |
| 202374 | 6.672937028  | 5.658707  | 4.64447699   | -0.352108471 | -0.352108471 | -0.352108471 |
| 202781 | 4.515752443  | 7.0529906 | 9.590228763  | 0.624614178  | 0.440372779  | 0.808855576  |
| 203068 | 10.0301857   | 10.262929 | 9.797442603  | 10.38372362  | 11.69779243  | 9.069654805  |
| 203100 | 5.28323533   | 6.6924259 | 8.101616525  | 1.585227283  | 2.529447424  | 3.473667564  |
| 203102 | -0.352108471 | -0.352108 | -0.352108471 | 5.582192779  | 4.813830548  | 6.35055501   |
| 203197 | 7.903179714  | 5.3776118 | 2.852043788  | 3.584762911  | 2.986345121  | 4.183180702  |
| 203245 | 6.477919921  | 8.0975434 | 9.717166944  | 5.941194113  | 8.006828735  | 6.974011424  |
| 203260 | -0.352108471 | -0.352108 | -0.352108471 | 5.311586026  | 6.104159744  | 6.896733462  |
| 203286 | 5.729410118  | 5.4283939 | 5.127377631  | -0.352108471 | -0.352108471 | -0.352108471 |
| 203522 | 5.017136436  | 5.054281  | 4.979991919  | -0.352108471 | -0.352108471 | -0.352108471 |
| 203547 | 6.67090677   | 8.3535832 | 7.512244991  | 6.801905484  | 5.924443035  | 5.046980586  |
| 204010 | 7.591293105  | 6.1515856 | 4.711878152  | 5.192287165  | 6.022050925  | 6.851814685  |
| 204851 | -0.352108471 | -0.352108 | -0.352108471 | 2.99677462   | 4.688318557  | 1.305230684  |
| 205327 | -0.352108471 | -0.352108 | -0.352108471 | 6.862051769  | 5.785505277  | 4.708958786  |
| 205428 | -0.352108471 | -0.352108 | -0.352108471 | 6.227060744  | 5.415760932  | 5.821410838  |
| 205564 | 3.416753068  | 7.7075662 | 5.562159617  | 8.280354971  | 7.240174153  | 6.199993335  |
| 205717 | 6.272317051  | 7.4769937 | 5.067640382  | 8.990037256  | 6.964395188  | 4.938753119  |
| 207063 | -0.352108471 | -0.352108 | -0.352108471 | 4.424689719  | 6.087644454  | 7.75059919   |
| 219287 | 5.38675695   | 5.3152588 | 5.458255064  | 1.475082136  | 1.14221151   | 1.807952763  |
| 219333 | 5.428393874  | 5.4582551 | 5.398532684  | -0.352108471 | -0.352108471 | -0.352108471 |
| 219347 | 4.963301433  | 4.671913  | 5.254689875  | 5.962540258  | 5.315258837  | 6.609821679  |
| 219402 | 6.75496194   | 5.9467163 | 7.563207537  | -0.352108471 | -0.352108471 | -0.352108471 |
| 219447 | 5.999674881  | 6.2154027 | 6.107538801  | -0.352108471 | -0.352108471 | -0.352108471 |
| 219482 | 6.816905042  | 6.3469852 | 7.286824927  | -0.352108471 | -0.352108471 | -0.352108471 |
| 219527 | -0.352108471 | -0.352108 | -0.352108471 | 4.716626033  | 6.266367194  | 7.816108355  |
| 219541 | -0.352108471 | -0.352108 | -0.352108471 | 2.313941724  | -0.352108471 | 4.979991919  |
| 219654 | -0.352108471 | -0.352108 | -0.352108471 | 5.401218419  | 9.236610442  | 7.318914431  |
| 219699 | 5.288995261  | 5.1522471 | 5.015498966  | 4.701546485  | 6.492287497  | 5.596916991  |
| 219790 | -0.063977979 | 2.3139417 | 4.691861427  | 2.242596918  | 2.232575625  | 2.252618212  |
| 219844 | 6.490914351  | 5.035798  | 7.94603069   | 2.808873637  | 2.334436445  | 1.859999252  |
| 219855 | 9.567757604  | 10.057749 | 9.077766391  | 5.943092199  | 8.979859061  | 7.46147563   |
| 219874 | 6.573968999  | 7.4045974 | 5.743340581  | -0.352108471 | -0.352108471 | -0.352108471 |
| 219875 | -0.352108471 | -0.352108 | -0.352108471 | 5.903760504  | 6.088693899  | 5.718827109  |
| 219902 | 7.052488825  | 6.206447  | 5.360405116  | 7.264035061  | 6.068415012  | 4.872794963  |



|        |              |           |              |              |              |              |
|--------|--------------|-----------|--------------|--------------|--------------|--------------|
| 219931 | -0.352108471 | -0.352108 | -0.352108471 | 4.400452081  | 4.688318557  | 4.112585606  |
| 219938 | 5.493783215  | 5.4205665 | 5.566999896  | -0.352108471 | -0.352108471 | -0.352108471 |
| 219972 | -0.352108471 | -0.352108 | -0.352108471 | 5.078578358  | 3.36730463   | 1.656030901  |
| 219988 | 6.463674915  | 5.7974013 | 7.129948491  | 7.468165213  | 6.251034844  | 5.033904474  |
| 220002 | -0.352108471 | -0.352108 | -0.352108471 | 5.713395024  | 5.733576008  | 5.723485516  |
| 220070 | 4.129193875  | 4.9841517 | 5.839109536  | 2.073301066  | 1.89926805   | 2.247334082  |
| 220074 | 8.002836109  | 9.0525622 | 6.95311002   | 6.407045466  | 6.66228969   | 6.917533914  |
| 220082 | 7.233420289  | 6.9150602 | 7.551780416  | -0.352108471 | -0.352108471 | -0.352108471 |
| 220108 | 7.575267767  | 8.5943083 | 6.556227274  | 0.624614178  | 0.808855576  | 0.440372779  |
| 220134 | 8.796764647  | 8.8524604 | 8.741068878  | 7.149231072  | 7.245996144  | 7.052466     |
| 220323 | 6.332466669  | 4.5790376 | 8.085895716  | 8.757508619  | 7.067751423  | 7.912630021  |
| 220359 | 8.240890183  | 4.6597155 | 6.450302837  | 1.158344319  | 3.346892105  | 2.252618212  |
| 220429 | 2.711561556  | 2.4779183 | 2.94520481   | -0.352108471 | -0.352108471 | -0.352108471 |
| 220441 | 5.711925407  | 4.8708731 | 5.291399258  | 1.591415247  | 2.252618212  | 0.930212283  |
| 220594 | -0.352108471 | -0.352108 | -0.352108471 | 2.461532669  | 4.482692559  | 0.440372779  |
| 220729 | 7.795945694  | 4.718147  | 6.257046343  | 4.714381525  | 3.156541914  | 3.935461719  |
| 220906 | 6.886923832  | 5.9628388 | 6.424881323  | 6.594186439  | 5.736549925  | 7.451822953  |
| 220930 | 2.280956994  | 4.9880158 | -0.426101797 | -0.352108471 | -0.352108471 | -0.352108471 |
| 220988 | -0.352108471 | -0.352108 | -0.352108471 | 6.906890338  | 6.420822611  | 6.663856474  |
| 221002 | 6.502263028  | 6.65465   | 6.349876069  | -0.352108471 | -0.352108471 | -0.352108471 |
| 221035 | 5.999482013  | 5.6142717 | 5.806876842  | 2.025457316  | 6.249600322  | 4.137528819  |
| 221060 | 6.87759802   | 4.5443591 | 5.710978578  | 0.975533543  | 1.14221151   | 0.808855576  |
| 221074 | 6.152439471  | 6.2697825 | 6.035096416  | -0.352108471 | -0.352108471 | -0.352108471 |
| 221091 | 5.990519134  | 6.2873746 | 6.138946856  | 6.041417066  | 5.47633612   | 4.911255175  |
| 221092 | 5.380817234  | 5.8001998 | 6.219582341  | 6.288041837  | 5.920817098  | 6.104429468  |
| 221143 | -0.352108471 | -0.352108 | -0.352108471 | 3.701877892  | 2.191310813  | 5.212444972  |
| 221150 | -0.352108471 | -0.352108 | -0.352108471 | 2.895806021  | 5.052267685  | 7.20872935   |
| 221154 | 6.002308672  | 6.0023087 | 6.002308672  | 5.958359385  | 5.958359385  | 5.958359385  |
| 221178 | 3.127737875  | 3.7195458 | 2.53592998   | 4.178899946  | 3.19879068   | 5.159009211  |
| 221188 | -0.352108471 | -0.352108 | -0.352108471 | 3.767483207  | 3.615460478  | 3.919505936  |
| 221223 | 3.758937782  | 2.7606188 | 1.762299734  | 0.476561106  | 1.305230684  | -0.352108471 |
| 221301 | -0.352108471 | -0.352108 | -0.352108471 | 4.456886199  | 7.702447163  | 1.211325236  |
| 221322 | 5.492945331  | 8.0641207 | 6.778533013  | 3.31024476   | 2.753318655  | 3.867170866  |
| 221336 | -0.352108471 | -0.352108 | -0.352108471 | 4.927030449  | 4.438505554  | 3.949980658  |
| 221393 | -0.352108471 | -0.352108 | -0.352108471 | 4.594993411  | 3.585121301  | 2.575249191  |
| 221395 | 7.570869798  | 5.8648729 | 6.717871361  | -0.352108471 | -0.352108471 | -0.352108471 |
| 221400 | 5.55876787   | 3.0290065 | 8.088529221  | -0.352108471 | -0.352108471 | -0.352108471 |
| 221442 | 4.64626819   | 4.8884122 | 4.404124174  | 2.247393013  | 1.807952763  | 2.686833264  |
| 221477 | 6.624424137  | 3.8105581 | 5.217491139  | -0.352108471 | -0.352108471 | -0.352108471 |
| 221491 | -0.352108471 | -0.352108 | -0.352108471 | 5.801098295  | 6.038453511  | 5.563743079  |
| 221656 | -0.352108471 | -0.352108 | -0.352108471 | 5.095423988  | 5.124543452  | 5.066304524  |
| 221692 | 3.682181533  | 3.9834604 | 3.380902678  | 5.09343014   | 6.59756953   | 5.845499835  |
| 221710 | 6.748384093  | 6.7990975 | 6.77374078   | -0.352108471 | -0.352108471 | -0.352108471 |
| 221718 | -0.352108471 | -0.352108 | -0.352108471 | 6.084074277  | 6.32531018   | 6.566546084  |
| 221749 | 7.39370248   | 6.1215288 | 4.849355057  | 0.446802307  | 6.723440295  | 3.585121301  |
| 221785 | -0.352108471 | -0.352108 | -0.352108471 | 2.187383195  | 2.317853228  | 2.252618212  |
| 221830 | 3.002603941  | 7.0178419 | 5.010222934  | -0.352108471 | -0.352108471 | -0.352108471 |

|        |              |           |              |              |              |              |
|--------|--------------|-----------|--------------|--------------|--------------|--------------|
| 221833 | -0.352108471 | -0.352108 | -0.352108471 | 6.826080339  | 4.893154399  | 5.859617369  |
| 221883 | 6.151585628  | 5.1530189 | 7.150152377  | -0.352108471 | -0.352108471 | -0.352108471 |
| 221895 | 8.397996571  | 7.7150774 | 8.056536983  | -0.352108471 | -0.352108471 | -0.352108471 |
| 221908 | -0.352108471 | -0.352108 | -0.352108471 | 5.669144456  | 4.80208491   | 3.935025364  |
| 221914 | -0.352108471 | -0.352108 | -0.352108471 | 4.591994762  | 5.637296679  | 6.682598595  |
| 221927 | -0.352108471 | -0.352108 | -0.352108471 | 2.902991023  | 4.409326454  | 1.396655591  |
| 221935 | 4.947007189  | 2.7692418 | 7.124772545  | -0.352108471 | -0.352108471 | -0.352108471 |
| 221937 | 10.22061804  | 10.803214 | 9.638022037  | 8.501347401  | 8.518425304  | 8.484269499  |
| 221938 | 2.351086241  | 1.2012726 | 3.500899872  | 1.270297347  | 0.808855576  | 1.731739118  |
| 221960 | -0.352108471 | -0.352108 | -0.352108471 | 3.52433951   | 2.147539136  | 4.901139884  |
| 221981 | -0.352108471 | -0.352108 | -0.352108471 | 5.704335255  | 9.272440781  | 2.136229728  |
| 222068 | 9.94127085   | 4.3903389 | 7.165804888  | 0.476561106  | -0.352108471 | 1.305230684  |
| 222235 | 6.429170264  | 6.1999612 | 6.658379305  | 5.080554094  | 5.529311366  | 4.631796822  |
| 222236 | 6.366945375  | 7.0274221 | 5.70646867   | 0.289051906  | -0.352108471 | 0.930212283  |
| 222256 | 6.451724919  | 6.797363  | 6.106086851  | 6.96170561   | 5.761472688  | 6.361589149  |
| 222484 | 5.594197874  | 6.9867748 | 8.379351626  | 6.457429872  | 6.796458395  | 6.11840135   |
| 222553 | 8.18781607   | 7.298998  | 6.410179957  | 6.135740193  | 6.652432567  | 5.61904782   |
| 222584 | 5.828848464  | 3.8509041 | 7.806792844  | -0.352108471 | -0.352108471 | -0.352108471 |
| 222611 | 4.372191214  | 5.6090592 | 3.13532318   | 6.9664421    | 3.067830771  | 5.017136436  |
| 222658 | 5.38379986   | 6.7956077 | 8.207415587  | 5.989949753  | 7.495134335  | 9.000318916  |
| 222663 | 6.767552344  | 6.8767254 | 6.658379305  | 5.546527222  | 5.529311366  | 5.563743079  |
| 222865 | 4.413452322  | 5.9011161 | 7.388779848  | 7.136107988  | 3.876532349  | 5.506320168  |
| 222962 | -0.352108471 | -0.352108 | -0.352108471 | 6.346162167  | 3.412762187  | 9.279562148  |
| 223082 | -0.352108471 | -0.352108 | -0.352108471 | 0.95025487   | -0.352108471 | 2.252618212  |
| 246184 | -0.352108471 | -0.352108 | -0.352108471 | 3.787842279  | 5.52367653   | 4.655759405  |
| 252839 | 7.364365087  | 6.0763762 | 6.720370627  | 7.549264307  | 6.558419977  | 5.567575647  |
| 252969 | 4.596539004  | 4.5610633 | 4.578801146  | 5.623457858  | 4.410815013  | 5.017136436  |
| 252983 | 6.542911663  | 5.4177564 | 5.980334028  | -0.352108471 | -0.352108471 | -0.352108471 |
| 252995 | -0.352108471 | -0.352108 | -0.352108471 | 3.555305497  | 6.267994919  | 4.911650208  |
| 253039 | 4.045982599  | 3.6244563 | 3.202929976  | 1.253937875  | 4.798393796  | 3.026165836  |
| 253044 | 5.375376867  | 5.2628167 | 5.31909676   | -0.352108471 | -0.352108471 | -0.352108471 |
| 253143 | -0.352108471 | -0.352108 | -0.352108471 | 6.071430822  | 4.178899946  | 2.286369069  |
| 253260 | 6.520082846  | 8.3964829 | 7.458282885  | 3.95204103   | 5.233567424  | 6.515093817  |
| 253461 | 8.725426084  | 6.8018138 | 4.878201463  | -0.352108471 | -0.352108471 | -0.352108471 |
| 253558 | -0.352108471 | -0.352108 | -0.352108471 | 6.296043865  | 6.31523113   | 6.276856601  |
| 253635 | 6.450002038  | 6.3236499 | 6.197297765  | 5.677785997  | 4.177572433  | 4.927679215  |
| 253639 | 5.924940787  | 6.8945567 | 6.409748741  | 5.537525048  | 5.36239135   | 5.449958199  |
| 253714 | 10.4671732   | 8.4279133 | 6.38865339   | 8.658718272  | 5.194726176  | 6.926722224  |
| 253827 | 7.569449151  | 8.843507  | 8.206478063  | 5.388820598  | 7.876691905  | 10.36456321  |
| 253832 | 7.451565443  | 8.6594299 | 6.243700959  | 3.061101714  | 1.14221151   | 4.979991919  |
| 253868 | 6.607016258  | 5.8319983 | 5.056980365  | 0.762376451  | -0.352108471 | 1.876861374  |
| 253982 | 5.262620663  | 5.307328  | 5.284974356  | 6.008119643  | 5.562890912  | 5.785505277  |
| 254013 | 4.187593997  | 6.4866125 | 5.337103237  | 6.549443322  | 4.747541319  | 5.648492321  |
| 254048 | 7.537200822  | 7.9437232 | 8.350245518  | 5.586906204  | 6.02075664   | 5.153055767  |
| 254065 | 3.683980801  | 3.4306791 | 3.937282489  | 8.30986052   | 6.463674915  | 4.61748931   |
| 254099 | -0.352108471 | -0.352108 | -0.352108471 | 5.886425029  | 5.926961306  | 5.845888751  |
| 254102 | 8.221827593  | 5.1264302 | 6.674128879  | 2.211943219  | 2.232575625  | 2.191310813  |

|        |              |           |              |              |              |              |
|--------|--------------|-----------|--------------|--------------|--------------|--------------|
| 254225 | 6.735779686  | 6.7508628 | 6.720696571  | -0.352108471 | -0.352108471 | -0.352108471 |
| 254240 | -0.352108471 | -0.352108 | -0.352108471 | 3.244499551  | 5.272100811  | 4.258300181  |
| 254295 | 7.684693308  | 4.62796   | 6.156326632  | 5.217268495  | 9.537239158  | 0.897297832  |
| 254359 | -0.352108471 | -0.352108 | -0.352108471 | 6.496886722  | 6.532588736  | 6.461184708  |
| 254863 | 5.788905932  | 5.8810131 | 5.973120225  | 4.776442757  | 6.022050925  | 7.267659093  |
| 254958 | -0.352108471 | -0.352108 | -0.352108471 | 5.539848076  | 5.95094085   | 5.745394463  |
| 255022 | 1.383520155  | 1.3559597 | 1.411080616  | 3.962303322  | 2.342205358  | 0.722107394  |
| 255082 | 5.21905516   | 5.4937832 | 5.768511269  | -0.352108471 | -0.352108471 | -0.352108471 |
| 255189 | 7.067158728  | 6.3968684 | 5.726578037  | -0.352108471 | -0.352108471 | -0.352108471 |
| 255252 | 7.914878548  | 7.2289277 | 6.542976772  | 7.156753887  | 6.920101788  | 6.683449689  |
| 255324 | 5.052622603  | 6.2407803 | 3.86446487   | 6.316009143  | 6.046029896  | 6.58598839   |
| 255403 | 2.920655209  | 5.3190968 | 7.717538311  | 1.371545024  | 1.305230684  | 1.437859363  |
| 255654 | -0.352108471 | -0.352108 | -0.352108471 | 2.865393679  | 2.508272848  | 2.686833264  |
| 255783 | 4.720108865  | 4.3859368 | 5.054280952  | -0.352108471 | -0.352108471 | -0.352108471 |
| 255919 | 6.783043088  | 7.5296218 | 6.036464421  | -0.120586129 | 2.121209733  | 4.363005595  |
| 255928 | 4.122631124  | 5.4619762 | 4.792303669  | -0.352108471 | -0.352108471 | -0.352108471 |
| 256006 | -0.352108471 | -0.352108 | -0.352108471 | 6.633983813  | 6.197874136  | 6.415928975  |
| 256051 | 6.905888978  | 3.6769095 | 5.291399258  | 5.298609063  | 6.329998693  | 7.361388324  |
| 256076 | -0.352108471 | -0.352108 | -0.352108471 | 7.09771715   | 7.101695289  | 7.099706219  |
| 256130 | -0.352108471 | -0.352108 | -0.352108471 | 4.52611146   | 4.80208491   | 5.078058361  |
| 256281 | 2.402866965  | 7.0598175 | 4.731342239  | -0.352108471 | -0.352108471 | -0.352108471 |
| 256302 | 4.323161992  | 6.5685405 | 8.813918972  | 4.193585611  | 3.605011212  | 3.016436813  |
| 256355 | 4.397178123  | 1.1240594 | 2.760618758  | 0.044132154  | 0.440372779  | -0.352108471 |
| 256356 | 5.412785261  | 2.7365298 | 0.06027426   | 3.86802867   | 3.203670606  | 2.539312541  |
| 256380 | 8.002453643  | 5.7645796 | 6.883516622  | 5.696774722  | 8.719275357  | 7.208025039  |
| 256472 | 8.482280937  | 6.9398718 | 5.39746266   | -0.352108471 | -0.352108471 | -0.352108471 |
| 256933 | -0.352108471 | -0.352108 | -0.352108471 | 5.23117587   | 4.163384448  | 6.298967293  |
| 256987 | 1.392109249  | 0.6613649 | 2.122853612  | 2.387357251  | 5.095423988  | 7.803490725  |
| 257000 | 6.624675593  | 10.185091 | 3.064260581  | 5.277219847  | 5.156478558  | 5.397961136  |
| 257062 | 2.618057952  | 5.5882244 | -0.352108471 | -0.352108471 | -0.352108471 | -0.352108471 |
| 257106 | 2.351086241  | -0.352108 | 5.054280952  | -0.352108471 | -0.352108471 | -0.352108471 |
| 257144 | 2.920614754  | 3.8477905 | 4.774966251  | 7.36312201   | 6.630621079  | 5.898120148  |
| 257364 | 8.922247489  | 6.9675112 | 5.012775001  | 6.769421128  | 5.095423988  | 3.421426848  |
| 257396 | -0.352108471 | -0.352108 | -0.352108471 | 2.888404339  | 7.51337844   | 5.20089139   |
| 257415 | -0.352108471 | -0.352108 | -0.352108471 | 5.647436589  | 5.100686928  | 4.553937267  |
| 257629 | 5.895373921  | 5.8284011 | 5.962346694  | 6.615527989  | 6.738393601  | 6.492662376  |
| 259296 | 4.923749454  | 6.2738323 | 7.623915064  | -0.352108471 | -0.352108471 | -0.352108471 |
| 260341 | 3.797822384  | 3.6761388 | 3.919505936  | 3.646079301  | 5.191222747  | 2.100935855  |
| 260425 | 2.588601447  | -0.352108 | 5.529311366  | -0.352108471 | -0.352108471 | -0.352108471 |
| 261726 | 4.640191479  | 8.1642327 | 6.402212088  | 0.289051906  | -0.352108471 | 0.930212283  |
| 261734 | 1.383520155  | -0.352108 | 3.119148782  | 7.036396027  | 3.457977877  | 10.61481418  |
| 266655 | 8.071720344  | 8.7560584 | 7.387382251  | 6.831268578  | 6.733784849  | 6.928752307  |
| 266971 | 5.741790366  | 8.4824511 | 7.112120745  | 0.440372779  | 0.440372779  | 0.440372779  |
| 267020 | 5.334238245  | 5.3828326 | 5.285643864  | 4.212536839  | 0.674933824  | 2.443735331  |
| 280636 | -0.352108471 | -0.352108 | -0.352108471 | 2.61692804   | 6.86293602   | 11.108944    |
| 280659 | -0.352108471 | -0.352108 | -0.352108471 | 6.395756437  | 5.45070971   | 7.340803165  |
| 282618 | -0.352108471 | -0.352108 | -0.352108471 | 1.99196379   | 3.660200284  | 2.826082037  |

|        |              |           |              |              |              |              |
|--------|--------------|-----------|--------------|--------------|--------------|--------------|
| 282809 | -0.352108471 | -0.352108 | -0.352108471 | 2.519016059  | 2.139844176  | 1.760672292  |
| 282890 | 6.485362982  | 5.9417621 | 5.39816117   | -0.352108471 | -0.352108471 | -0.352108471 |
| 282969 | 5.34274782   | 6.1655016 | 5.754124716  | 4.628113008  | 7.781199508  | 6.204656258  |
| 282980 | 4.918802255  | 7.7931481 | 6.355975153  | 3.3031696    | 5.836316644  | 0.770022555  |
| 282991 | 0.679446692  | 4.0130283 | 7.346609939  | 5.477176123  | 5.493783215  | 5.510390307  |
| 283011 | -0.352108471 | -0.352108 | -0.352108471 | 6.671874638  | 6.689878453  | 6.653870824  |
| 283028 | -0.352108471 | -0.352108 | -0.352108471 | 2.687313607  | 5.596916991  | 8.506520375  |
| 283045 | 5.021296917  | 6.2016069 | 7.381916802  | 1.14221151   | 1.14221151   | 1.14221151   |
| 283078 | 5.110258875  | 7.4966636 | 6.303461245  | -0.352108471 | -0.352108471 | -0.352108471 |
| 283080 | 4.095303961  | 3.136327  | 5.054280952  | 0.044132154  | 0.440372779  | -0.352108471 |
| 283089 | 7.508871913  | 7.6881405 | 7.598506213  | 6.362981115  | 6.88868102   | 5.837281209  |
| 283130 | 4.758034591  | 7.5438387 | 6.150936629  | 6.351793093  | 6.520834686  | 6.43631389   |
| 283131 | 11.03821027  | 8.6471095 | 9.842659868  | 6.68348585   | 8.977568587  | 7.830527219  |
| 283143 | -0.352108471 | -0.352108 | -0.352108471 | 5.664076022  | 2.693723869  | 4.178899946  |
| 283149 | 6.573968999  | 6.5919201 | 6.556017863  | 8.425153342  | 8.646173588  | 8.535663465  |
| 283174 | 6.396868383  | 6.4105853 | 6.383151496  | -0.352108471 | -0.352108471 | -0.352108471 |
| 283194 | -0.352108471 | -0.352108 | -0.352108471 | 3.1200183    | 7.938604431  | 5.529311366  |
| 283209 | 9.484803367  | 6.932457  | 8.208630159  | 6.887728041  | 7.041867106  | 6.733588975  |
| 283237 | -0.352108471 | -0.352108 | -0.352108471 | 4.572821938  | 6.497182024  | 8.42154211   |
| 283267 | 8.000791442  | 8.655064  | 9.309336471  | 6.151697586  | 7.108984518  | 8.066271449  |
| 283299 | 5.181626131  | 4.4826926 | 5.880559702  | 0.476561106  | -0.352108471 | 1.305230684  |
| 283335 | 3.402171849  | 5.7610936 | 4.581632733  | 0.289051906  | -0.352108471 | 0.930212283  |
| 283337 | -0.352108471 | -0.352108 | -0.352108471 | 2.686833264  | 2.686833264  | 2.686833264  |
| 283349 | 6.352053864  | 4.6858026 | 8.018305156  | 7.052089784  | 6.003978506  | 4.955867227  |
| 283373 | 6.242048279  | 2.6996043 | 9.784492276  | 7.784700846  | 7.18130912   | 7.483004983  |
| 283375 | 1.392109249  | 1.6687394 | 1.115479055  | 6.085586463  | 4.018737342  | 1.951888221  |
| 283377 | 4.713157169  | 6.1276241 | 5.420390631  | 0.440372779  | 0.440372779  | 0.440372779  |
| 283404 | 1.820317844  | 2.7115616 | 3.602805268  | -0.352108471 | -0.352108471 | -0.352108471 |
| 283422 | 5.416755409  | 5.5587679 | 5.700780331  | -0.352108471 | -0.352108471 | -0.352108471 |
| 283431 | 5.691655254  | 6.8385531 | 7.985451044  | 7.104346779  | 6.946414218  | 7.26227934   |
| 283432 | 6.286940651  | 8.8064836 | 7.54671213   | 8.323144418  | 4.274781825  | 6.298963122  |
| 283450 | -0.352108471 | -0.352108 | -0.352108471 | 6.370545086  | 6.96585859   | 5.775231583  |
| 283459 | 4.528924884  | 4.671913  | 4.385936778  | 6.32531018   | 6.31523113   | 6.33538923   |
| 283460 | 7.173278044  | 8.590362  | 10.007446    | 6.411432414  | 6.960337814  | 5.862527014  |
| 283464 | 7.017668263  | 6.9529417 | 7.082394844  | 6.278615783  | 6.174080069  | 6.383151496  |
| 283480 | -0.352108471 | -0.352108 | -0.352108471 | 8.441625886  | 4.030216436  | 6.235921161  |
| 283487 | 7.436272311  | 7.6193767 | 7.802481028  | 8.72888555   | 7.777997401  | 6.827109253  |
| 283489 | -0.352108471 | -0.352108 | -0.352108471 | 6.829307464  | 3.82544391   | 9.833171017  |
| 283491 | 6.398375221  | 6.8767254 | 5.920025058  | 4.927679215  | 4.954218546  | 4.901139884  |
| 283507 | -0.352108471 | -0.352108 | -0.352108471 | 5.054752278  | 6.121696471  | 5.588224375  |
| 283514 | 7.398193617  | 7.4922194 | 7.304167827  | -0.352108471 | -0.352108471 | -0.352108471 |
| 283521 | 3.820053939  | 1.2263703 | 2.523212107  | -0.352108471 | -0.352108471 | -0.352108471 |
| 283551 | 5.018251426  | 4.2245128 | 5.811990065  | 0.440372779  | 0.440372779  | 0.440372779  |
| 283575 | 3.986033342  | 4.617923  | 3.354143641  | 1.873849414  | 1.807952763  | 1.939746065  |
| 283585 | 6.098078317  | 5.3223397 | 6.873816911  | 3.415895326  | 2.588220532  | 3.002057929  |
| 283592 | 5.986976026  | 4.6417519 | 7.332200159  | 1.843175982  | 2.206185083  | 2.024680532  |
| 283596 | -0.352108471 | -0.352108 | -0.352108471 | 4.655317146  | 9.230758645  | 6.943037895  |

|        |              |           |              |              |              |              |
|--------|--------------|-----------|--------------|--------------|--------------|--------------|
| 283624 | -0.352108471 | -0.352108 | -0.352108471 | 4.832259402  | 6.830732744  | 8.829206086  |
| 283635 | 4.380659212  | 6.2730965 | 8.165533808  | 3.514991766  | 1.565410274  | 5.464573259  |
| 283663 | 7.360749928  | 3.7870378 | 5.573893887  | 2.380725313  | 5.344143265  | 8.307561217  |
| 283683 | 5.546367231  | 6.0384535 | 5.054280952  | 2.529447424  | 1.939746065  | 3.119148782  |
| 283693 | 5.625373322  | 6.2395908 | 6.853808233  | 7.569043296  | 5.925900831  | 4.282758366  |
| 283731 | 4.817047211  | 6.365564  | 5.591305588  | 3.041395306  | 4.251326213  | 5.46125712   |
| 283767 | 5.93871762   | 5.0488488 | 5.493783215  | 3.856218142  | 3.182601909  | 2.508985676  |
| 283788 | -0.352108471 | -0.352108 | -0.352108471 | 7.675724814  | 5.497706334  | 6.586715574  |
| 283796 | 5.591305588  | 5.6501613 | 5.532449852  | -0.352108471 | -0.352108471 | -0.352108471 |
| 283856 | 6.199679026  | 6.479333  | 5.920025058  | 4.499717253  | 3.337746555  | 5.661687951  |
| 283871 | 6.468151867  | 5.8840588 | 7.052244952  | 7.387749391  | 9.674767244  | 5.100731538  |
| 283875 | 3.630792518  | 5.4989447 | 7.36709692   | 6.721923052  | 7.014978257  | 6.428867846  |
| 283876 | 6.038383809  | 6.2474636 | 6.456543359  | 1.223721097  | 1.305230684  | 1.14221151   |
| 283888 | 4.151165895  | 5.0846754 | 6.018184812  | 2.722314828  | 5.475425549  | 4.098870188  |
| 283899 | 6.521613016  | 5.6934646 | 6.107538801  | 2.686833264  | 1.608488685  | 3.765177842  |
| 283902 | 3.884443122  | 6.6855056 | 5.284974356  | 0.044132154  | 0.440372779  | -0.352108471 |
| 283922 | -0.352108471 | -0.352108 | -0.352108471 | 3.038680847  | 4.948453082  | 1.128908612  |
| 283932 | 6.177986381  | 7.0653443 | 7.952702234  | 3.293591639  | 5.941173134  | 4.617382386  |
| 283953 | 7.368063388  | 5.9068425 | 4.445621706  | -0.352108471 | -0.352108471 | -0.352108471 |
| 283970 | 7.261991367  | 6.9978561 | 7.526126679  | 7.095970797  | 8.170701273  | 6.02124032   |
| 283981 | -0.352108471 | -0.352108 | -0.352108471 | 3.119148782  | 3.119148782  | 3.119148782  |
| 283985 | 4.31885757   | 4.4315687 | 4.544279759  | 2.862380891  | 2.024680532  | 1.186980174  |
| 283989 | 5.758523395  | 3.5522076 | 7.964839195  | -0.352108471 | -0.352108471 | -0.352108471 |
| 283991 | 7.036907464  | 5.2061501 | 6.121528769  | 2.211943219  | 0.704149026  | 3.719737412  |
| 284021 | 6.840836283  | 5.6462551 | 4.451673977  | 4.46509823   | 4.555364341  | 4.645630453  |
| 284023 | 9.312623719  | 8.0402708 | 6.767917969  | 10.18278973  | 7.443142368  | 4.703495002  |
| 284034 | 5.604405525  | 9.0949925 | 7.349699016  | 7.322437573  | 7.492610575  | 7.152264571  |
| 284047 | 7.890470135  | 9.4261678 | 10.96186547  | 5.383562122  | 10.98670747  | 8.185134795  |
| 284058 | -0.352108471 | -0.352108 | -0.352108471 | 5.255332057  | 5.369332089  | 5.48333212   |
| 284069 | 2.016914154  | -0.352108 | 4.385936778  | 4.438505554  | 4.245214285  | 4.631796822  |
| 284080 | 6.414258136  | 8.1938494 | 4.63466686   | -0.352108471 | -0.352108471 | -0.352108471 |
| 284086 | 5.455819204  | 6.5988068 | 7.741794438  | 3.076801296  | 4.199045311  | 5.321289325  |
| 284098 | 5.052267685  | 8.8208009 | 1.283734475  | 2.049256654  | 1.526552342  | 2.571960965  |
| 284106 | -0.352108471 | -0.352108 | -0.352108471 | 9.133614457  | 6.280301159  | 3.42698786   |
| 284110 | 6.013626829  | 6.0526947 | 6.033160789  | 3.182601909  | 2.252618212  | 4.112585606  |
| 284116 | 4.273770249  | 6.3545955 | 5.314182891  | 1.14221151   | -0.19493469  | 2.479357709  |
| 284119 | 6.688191699  | 13.191764 | 9.939978022  | 10.38657738  | 7.710084556  | 13.0630702   |
| 284161 | 8.104344652  | 7.8991344 | 8.309554875  | 7.310072079  | 7.342696275  | 7.277447884  |
| 284184 | 7.385292886  | 4.9178784 | 6.151585628  | 1.689109503  | 1.731739118  | 1.646479888  |
| 284207 | -0.352108471 | -0.352108 | -0.352108471 | 1.760746145  | 3.345400448  | 2.553073296  |
| 284217 | 5.652271474  | 5.5293114 | 5.775231583  | 4.108072315  | 5.529311366  | 2.686833264  |
| 284232 | 14.16164786  | 12.442451 | 10.72325433  | 13.03550605  | 10.4030105   | 11.71925827  |
| 284257 | -0.352108471 | -0.352108 | -0.352108471 | 2.451290702  | 5.254689875  | -0.352108471 |
| 284276 | 3.624456288  | 2.7887771 | 4.460135447  | 2.18181885   | 0.808855576  | 3.554782125  |
| 284297 | 5.854618147  | 6.6294784 | 6.242048279  | 7.063286202  | 7.999012266  | 6.127560139  |
| 284323 | 7.20576003   | 9.1976926 | 5.213827432  | 8.710752167  | 4.792351609  | 6.751551888  |
| 284344 | 5.661488853  | 6.7295934 | 6.195541118  | 8.686523674  | 7.171235926  | 5.655948177  |

|        |              |           |              |              |              |              |
|--------|--------------|-----------|--------------|--------------|--------------|--------------|
| 284352 | -0.352108471 | -0.352108 | -0.352108471 | 2.252618212  | 4.117436641  | 0.387799782  |
| 284353 | 0.022453161  | 8.1621164 | 4.092284781  | -0.352108471 | -0.352108471 | -0.352108471 |
| 284361 | 3.846832868  | 5.7377745 | 4.792303669  | -0.352108471 | -0.352108471 | -0.352108471 |
| 284379 | 5.386773706  | 4.9154635 | 5.858083893  | 3.39824945   | 3.33706132   | 3.367655385  |
| 284385 | 4.529128697  | 7.7139288 | 6.121528769  | -0.352108471 | -0.352108471 | -0.352108471 |
| 284390 | -0.352108471 | -0.352108 | -0.352108471 | 2.38621749   | 4.459315285  | 0.313119695  |
| 284395 | 4.840598726  | 6.0908083 | 7.341017955  | -0.352108471 | -0.352108471 | -0.352108471 |
| 284403 | 5.726143017  | 6.3146192 | 6.020381091  | -0.352108471 | -0.352108471 | -0.352108471 |
| 284406 | 8.394732309  | 8.4891742 | 8.583616018  | 6.016006936  | 6.989965632  | 5.04204824   |
| 284412 | 6.18966628   | 6.3956138 | 5.983718797  | 7.295277878  | 7.026651754  | 7.563904002  |
| 284418 | -0.352108471 | -0.352108 | -0.352108471 | 5.095423988  | 5.124543452  | 5.066304524  |
| 284428 | -0.352108471 | -0.352108 | -0.352108471 | 2.451290702  | 5.254689875  | -0.352108471 |
| 284434 | 7.441875269  | 8.5263285 | 6.357422     | 2.73734835   | 3.012289909  | 3.287231469  |
| 284440 | 8.246225822  | 6.6719406 | 9.820511058  | 6.363762655  | 5.957816387  | 6.769708924  |
| 284454 | 6.721780511  | 5.3950788 | 6.058429676  | 5.890439961  | 5.047778452  | 6.733101471  |
| 284551 | 7.165804888  | 7.4934092 | 6.838200581  | 7.501358274  | 7.548624299  | 7.595890325  |
| 284576 | 5.998406448  | 11.212097 | 0.784715434  | -0.771952874 | 3.96815687   | 1.598101998  |
| 284577 | 3.54853814   | 7.1980133 | 5.373275698  | 6.728388561  | 10.83142141  | 2.625355717  |
| 284581 | 7.077671653  | 6.7014235 | 6.889547564  | 5.984984884  | 7.455763618  | 4.514206149  |
| 284600 | 5.575517823  | 6.2865194 | 4.864516278  | 2.376386664  | 2.393884559  | 2.411382455  |
| 284612 | 7.240552188  | 2.145426  | 4.692989119  | 2.075707141  | 2.473324272  | 2.274515706  |
| 284613 | 3.376572818  | 6.7744663 | 5.075519558  | 3.771392125  | 4.742680396  | 5.713968666  |
| 284615 | 6.640019393  | 6.9041683 | 6.375870496  | -0.352108471 | -0.352108471 | -0.352108471 |
| 284618 | 3.064219239  | 2.6573268 | 2.860773008  | -0.352108471 | -0.352108471 | -0.352108471 |
| 284649 | 4.579618372  | 4.9140225 | 4.245214285  | -0.352108471 | -0.352108471 | -0.352108471 |
| 284677 | -0.352108471 | -0.352108 | -0.352108471 | 5.23117587   | 6.241350462  | 4.221001278  |
| 284695 | -0.352108471 | -0.352108 | -0.352108471 | 4.472882012  | 3.564592672  | 4.018737342  |
| 284739 | 5.284974356  | 5.2627535 | 5.307195168  | -0.352108471 | -0.352108471 | -0.352108471 |
| 284805 | 5.339482499  | 3.0183174 | 4.178899946  | 2.463550772  | 3.119148782  | 1.807952763  |
| 284865 | 7.886153128  | 5.4756111 | 6.68088213   | 1.023607914  | 2.334436445  | 3.645264975  |
| 284889 | -0.352108471 | -0.352108 | -0.352108471 | 6.80054651   | 5.730016661  | 4.659486811  |
| 284898 | 3.515141236  | 3.6761388 | 3.354143641  | 5.369332089  | 5.383503645  | 5.355160532  |
| 284904 | 7.623360775  | 8.3343564 | 6.912365178  | 6.102629885  | 5.823341069  | 6.3819187    |
| 284912 | 4.821539291  | 5.2020263 | 4.441052278  | 2.342793532  | 4.245214285  | 0.440372779  |
| 284942 | 3.181437345  | 4.5195869 | 5.857736495  | 5.938576252  | 3.664596399  | 8.212556106  |
| 284948 | 1.383520155  | -0.352108 | 3.119148782  | 3.132770386  | 5.825167992  | 0.440372779  |
| 284950 | 5.741379086  | 5.1417464 | 4.542113696  | 6.681290203  | 7.395842732  | 7.038566468  |
| 284992 | 6.06875656   | 3.539709  | 8.597804163  | -0.352108471 | -0.352108471 | -0.352108471 |
| 285025 | -0.352108471 | -0.352108 | -0.352108471 | 3.7090491    | 3.631776812  | 3.554504525  |
| 285033 | 8.088789171  | 3.1615324 | 5.625160771  | -0.352108471 | -0.352108471 | -0.352108471 |
| 285051 | -0.352108471 | -0.352108 | -0.352108471 | 6.473375392  | 3.864940259  | 5.169157826  |
| 285103 | 5.284974356  | 4.3603524 | 6.209596345  | 3.266312788  | 2.655229797  | 2.044146806  |
| 285148 | 7.582855329  | 7.5378446 | 7.49283394   | 7.154670274  | 5.987934388  | 8.321406159  |
| 285175 | 5.248302639  | 6.9382755 | 6.093289078  | -0.352108471 | -0.352108471 | -0.352108471 |
| 285195 | 6.151585628  | 8.4046078 | 3.898563503  | -0.352108471 | -0.352108471 | -0.352108471 |
| 285203 | 5.061063419  | 6.3488076 | 5.704935534  | 0.82273449   | -0.352108471 | 1.997577452  |
| 285267 | -0.352108471 | -0.352108 | -0.352108471 | 5.412561087  | 5.421579811  | 5.403542364  |



|        |              |           |              |              |              |              |
|--------|--------------|-----------|--------------|--------------|--------------|--------------|
| 285282 | 9.259499519  | 5.0946149 | 7.177057188  | 3.067083405  | 5.695288594  | 8.323493783  |
| 285313 | 6.212536209  | 8.0140475 | 4.411024871  | -0.352108471 | -0.352108471 | -0.352108471 |
| 285315 | 6.822470677  | 5.8484172 | 6.33544393   | 5.544294567  | 5.964812231  | 5.754553399  |
| 285335 | -0.352108471 | -0.352108 | -0.352108471 | 2.211943219  | 2.232575625  | 2.191310813  |
| 285349 | 6.072888354  | 6.1688661 | 6.12087721   | 4.777745925  | 5.663737322  | 6.549728718  |
| 285352 | 2.760618758  | 3.0225605 | 2.498676991  | 0.044132154  | 0.440372779  | -0.352108471 |
| 285368 | 5.006130849  | 4.9774847 | 4.948838525  | 3.469178822  | 3.226161794  | 2.983144766  |
| 285375 | 4.052071482  | 4.9315679 | 5.811064255  | 1.688802714  | 1.437859363  | 1.939746065  |
| 285382 | 6.053201629  | 5.0936262 | 5.573413938  | 5.100841931  | 6.724087732  | 8.347333533  |
| 285386 | -0.352108471 | -0.352108 | -0.352108471 | 4.927679215  | 4.917815466  | 4.937542964  |
| 285440 | 8.938668253  | 9.5625529 | 8.314783573  | 10.04994894  | 5.810128151  | 7.930038544  |
| 285456 | 4.297291017  | 2.7502277 | 5.844354326  | 6.001809131  | 4.294711678  | 7.708906585  |
| 285463 | 7.105747243  | 7.0241903 | 6.942633299  | 3.53749254   | 7.931291536  | 5.734392038  |
| 285484 | 6.323345273  | 5.5535381 | 4.783731017  | -0.352108471 | -0.352108471 | -0.352108471 |
| 285513 | 7.232638921  | 6.3324667 | 5.432294416  | -0.352108471 | -0.352108471 | -0.352108471 |
| 285521 | 5.810645685  | 4.8572962 | 3.903946657  | 4.264737406  | 2.954087547  | 5.575387265  |
| 285527 | 5.614711362  | 8.3688787 | 6.991795048  | -0.352108471 | -0.352108471 | -0.352108471 |
| 285550 | -0.352108471 | -0.352108 | -0.352108471 | 6.588254064  | 6.458297792  | 6.718210335  |
| 285605 | 7.426373543  | 7.1946087 | 6.962843781  | 6.295750117  | 6.959074387  | 5.632425847  |
| 285613 | -0.352108471 | -0.352108 | -0.352108471 | 5.281319318  | 3.919505936  | 2.557692553  |
| 285636 | 6.640019393  | 6.6538708 | 6.626167961  | -0.352108471 | -0.352108471 | -0.352108471 |
| 285638 | 6.504078908  | 7.2416967 | 7.979314469  | -0.151652638 | 3.522070642  | 7.195793922  |
| 285672 | 6.843992567  | 6.9981067 | 6.689878453  | 1.05704313   | 0.808855576  | 1.305230684  |
| 285679 | 4.522024694  | 5.3159043 | 3.728145125  | -0.352108471 | -0.352108471 | -0.352108471 |
| 285696 | 6.768942691  | 6.8028795 | 6.73500589   | 4.124812677  | 4.825632758  | 4.475222718  |
| 285704 | 5.048581062  | 8.7783967 | 6.913488898  | 6.658269112  | 7.450932417  | 7.054600764  |
| 285708 | 4.297291017  | 4.0509069 | 4.543675118  | 0.816314132  | 1.596660082  | 2.377006031  |
| 285753 | 5.428393874  | 7.0815531 | 3.775234698  | 4.22480309   | 6.076760471  | 5.150781781  |
| 285755 | 7.416850758  | 7.1059853 | 7.727716222  | 9.850577387  | 6.222321452  | 2.594065518  |
| 285758 | 2.481575183  | 3.5732463 | 1.389904029  | 0.701713319  | 1.167362396  | 1.633011474  |
| 285762 | 7.409706394  | 5.3166459 | 3.223585336  | 2.076022254  | 2.051108653  | 2.100935855  |
| 285800 | 4.230311308  | 6.4078822 | 5.31909676   | -0.352108471 | -0.352108471 | -0.352108471 |
| 285847 | 8.978172924  | 6.502263  | 4.026353132  | 0.228373553  | 0.808855576  | -0.352108471 |
| 285855 | 7.990348243  | 6.856185  | 9.124511468  | 6.584092692  | 7.69050115   | 8.796909607  |
| 285955 | 4.814358965  | 5.3835036 | 4.245214285  | -0.352108471 | -0.352108471 | -0.352108471 |
| 285962 | -0.352108471 | -0.352108 | -0.352108471 | 2.803874401  | 5.274309145  | 7.74474389   |
| 285965 | 7.163884331  | 8.0761926 | 7.620038487  | 4.927108276  | 5.392000621  | 5.856892965  |
| 285972 | 5.152247113  | 4.3506532 | 5.953841021  | 4.036683664  | 5.584371059  | 2.488996268  |
| 285987 | 6.618454158  | 5.8529375 | 5.087420765  | 1.043426334  | 1.646479888  | 0.440372779  |
| 286016 | 1.392109249  | 3.136327  | -0.352108471 | 3.884413197  | 3.337746555  | 4.43107984   |
| 286042 | -0.352108471 | -0.352108 | -0.352108471 | 1.473175732  | 2.072558294  | 2.671940856  |
| 286053 | 5.870109216  | 4.9866785 | 5.428393874  | -0.352108471 | -0.352108471 | -0.352108471 |
| 286075 | 6.273832259  | 6.2858739 | 6.261790604  | -0.352108471 | -0.352108471 | -0.352108471 |
| 286076 | 6.137515038  | 7.2704948 | 5.004535298  | 2.641840638  | 4.843308497  | 0.440372779  |
| 286101 | 5.285149151  | 6.2738323 | 7.262515367  | 4.158869237  | 3.337746555  | 4.979991919  |
| 286102 | 1.995832172  | 4.7994554 | 3.397643806  | 5.265298274  | 4.921497466  | 5.609099083  |
| 286122 | 1.006400681  | 2.8431725 | 4.679944359  | -0.352108471 | -0.352108471 | -0.352108471 |

|        |              |           |              |              |              |              |
|--------|--------------|-----------|--------------|--------------|--------------|--------------|
| 286144 | 6.997181405  | 6.6741289 | 6.351076353  | -0.352108471 | -0.352108471 | -0.352108471 |
| 286148 | 7.108015359  | 5.5656007 | 8.650429976  | 3.765339163  | 7.143894276  | 10.52244939  |
| 286151 | -0.352108471 | -0.352108 | -0.352108471 | 6.906299979  | 5.983736712  | 5.061173445  |
| 286183 | -0.352108471 | -0.352108 | -0.352108471 | 0.51532816   | 3.552844027  | 2.034086093  |
| 286184 | 1.383520155  | -0.352108 | 3.119148782  | 5.783882438  | 7.919651084  | 3.648113793  |
| 286186 | 3.692804111  | 5.4785362 | 7.264268277  | 5.285023717  | 5.393523004  | 5.502022292  |
| 286190 | -0.352108471 | -0.352108 | -0.352108471 | 7.384563756  | 2.8168101    | 5.100686928  |
| 286205 | 9.363576856  | 9.6801122 | 9.521844524  | 7.015517182  | 9.071777868  | 8.043647525  |
| 286207 | -0.352108471 | -0.352108 | -0.352108471 | 0.940233577  | 2.232575625  | -0.352108471 |
| 286223 | 6.020381091  | 4.9392174 | 7.101544767  | -0.352108471 | -0.352108471 | -0.352108471 |
| 286297 | 4.205053102  | 5.980334  | 7.755614954  | -0.352108471 | -0.352108471 | -0.352108471 |
| 286336 | -0.352108471 | -0.352108 | -0.352108471 | 5.887251126  | 6.189655896  | 6.038453511  |
| 286410 | -0.352108471 | -0.352108 | -0.352108471 | 9.451973369  | 3.019868953  | 6.235921161  |
| 286437 | 10.80389404  | 10.600949 | 10.70242157  | 9.335445501  | 11.03245383  | 7.638437167  |
| 286467 | 5.172148081  | 4.3859368 | 5.958359385  | 2.368970958  | 2.686833264  | 2.051108653  |
| 286495 | -0.352108471 | -0.352108 | -0.352108471 | 5.157865587  | 1.873234985  | 3.515550286  |
| 286827 | 6.599502875  | 5.5726159 | 7.626389892  | 5.637954374  | 6.66130097   | 4.614607778  |
| 317649 | -0.352108471 | -0.352108 | -0.352108471 | 6.113850767  | 6.40631083   | 6.698770893  |
| 317662 | -0.352108471 | -0.352108 | -0.352108471 | 2.124237496  | 2.147539136  | 2.100935855  |
| 317671 | 5.935349667  | 8.3960687 | 7.165709172  | -0.352108471 | -0.352108471 | -0.352108471 |
| 317701 | 3.901586848  | 5.6588863 | 4.780236561  | -0.352108471 | -0.352108471 | -0.352108471 |
| 317751 | 5.876276997  | 5.9200251 | 5.832528937  | 0.440372779  | 0.440372779  | 0.440372779  |
| 317781 | 7.922197336  | 7.3271516 | 6.732105789  | 5.871319513  | 5.771457123  | 5.971181903  |
| 319085 | 7.044122659  | 4.155091  | 5.59960682   | 0.791292145  | 0.440372779  | 1.14221151   |
| 326342 | 5.013952558  | 5.4904894 | 5.252220963  | 4.622246972  | 3.300477529  | 3.961362251  |
| 326625 | 2.844322884  | 7.4407737 | 5.142548317  | 1.610206098  | 2.169424975  | 2.728643851  |
| 327657 | 6.640019393  | 7.9739914 | 5.30604736   | -0.352108471 | -0.352108471 | -0.352108471 |
| 333929 | 6.273832259  | 6.2858739 | 6.261790604  | -0.352108471 | -0.352108471 | -0.352108471 |
| 337968 | 6.614624415  | 6.4247235 | 6.519673958  | -0.352108471 | -0.352108471 | -0.352108471 |
| 338436 | 6.56437229   | 6.6211418 | 6.677911352  | 7.204147879  | 4.817190262  | 6.01066907   |
| 338442 | 2.419557138  | 1.8395576 | 2.99955665   | -0.352108471 | -0.352108471 | -0.352108471 |
| 338557 | 4.462502061  | 5.344627  | 6.226751981  | 2.039485684  | -0.352108471 | 4.43107984   |
| 338645 | 5.923573886  | 7.8061933 | 4.040954492  | 1.58479924   | 1.731739118  | 1.437859363  |
| 338653 | -0.352108471 | -0.352108 | -0.352108471 | 5.233567424  | 4.481802969  | 5.985331878  |
| 338667 | 7.042523083  | 4.5763832 | 9.508662972  | 4.66005769   | 4.688318557  | 4.631796822  |
| 338699 | 7.730043418  | 3.2469034 | 5.488473394  | 0.228373553  | -0.352108471 | 0.808855576  |
| 338739 | 4.485694886  | 4.9421496 | 4.713922221  | 0.727922146  | -0.352108471 | 1.807952763  |
| 338761 | 6.121528769  | 6.1414231 | 6.101634422  | -0.352108471 | -0.352108471 | -0.352108471 |
| 338773 | 5.249224703  | 5.2437595 | 5.254689875  | 2.469725738  | 2.686833264  | 2.252618212  |
| 338817 | 3.033771374  | 5.5927938 | 8.151816233  | 1.182147892  | 3.91110333   | 2.546625611  |
| 338949 | 6.640019393  | 7.0751355 | 6.204903312  | -0.352108471 | -0.352108471 | -0.352108471 |
| 339005 | 6.144186222  | 4.4682884 | 7.820084091  | 5.550848618  | 5.53494234   | 5.542895479  |
| 339044 | -0.352108471 | -0.352108 | -0.352108471 | 2.715466875  | 2.920869745  | 3.126272616  |
| 339059 | 6.588448077  | 6.0184744 | 6.303461245  | 0.440372779  | 0.440372779  | 0.440372779  |
| 339105 | 2.451290702  | -0.352108 | 5.254689875  | -0.352108471 | -0.352108471 | -0.352108471 |
| 339123 | 9.726501499  | 3.3868783 | 6.556689902  | 0.005072915  | 1.946552907  | 3.888032899  |
| 339145 | 7.178685391  | 3.1258088 | 5.152247113  | 3.381085654  | 4.954218546  | 1.807952763  |

|        |              |           |              |              |              |              |
|--------|--------------|-----------|--------------|--------------|--------------|--------------|
| 339166 | 3.870214259  | 4.5873902 | 5.304566221  | 1.740870922  | 3.513926194  | 2.627398558  |
| 339175 | 6.655167767  | 7.0302053 | 6.280130204  | 5.130985206  | 7.722351631  | 6.426668418  |
| 339184 | 8.968434982  | 7.3774273 | 5.786419624  | -0.352108471 | -0.352108471 | -0.352108471 |
| 339201 | 4.200971051  | 4.976206  | 4.58858854   | 6.51496239   | 3.618549613  | 9.411375168  |
| 339231 | 4.276366062  | 5.0235932 | 4.649979619  | 4.604264605  | 7.274729721  | 5.939497163  |
| 339240 | 3.27681682   | 2.3733834 | 2.8251001    | -0.352108471 | -0.352108471 | -0.352108471 |
| 339263 | 5.126581771  | 5.4937832 | 5.860984659  | 5.829474075  | 5.7686356    | 5.890312551  |
| 339324 | 4.477687161  | 6.1383138 | 7.798940403  | 3.391527281  | 5.353437222  | 1.42961734   |
| 339398 | 5.577840935  | 6.2420483 | 6.906255623  | -0.352108471 | -0.352108471 | -0.352108471 |
| 339416 | 7.611726253  | 7.0659821 | 6.520237918  | 1.245740716  | 2.051108653  | 0.440372779  |
| 339448 | 4.585494077  | 5.8774671 | 7.169440156  | 6.874487191  | 7.457478212  | 6.29149617   |
| 339451 | 6.967511245  | 6.8055026 | 7.129519899  | -0.352108471 | -0.352108471 | -0.352108471 |
| 339483 | -0.352108471 | -0.352108 | -0.352108471 | 5.668425445  | 7.431304437  | 3.905546453  |
| 339505 | 1.383520155  | -0.352108 | 3.119148782  | 5.254689875  | 5.681192388  | 4.828187363  |
| 339529 | -0.352108471 | -0.352108 | -0.352108471 | 1.543191936  | 2.049256654  | 2.555321371  |
| 339541 | -0.352108471 | -0.352108 | -0.352108471 | 2.451290702  | 2.438991888  | 2.463589516  |
| 339674 | 2.553073296  | 5.4582551 | -0.352108471 | -0.352108471 | -0.352108471 | -0.352108471 |
| 339742 | 2.38621749   | 1.1025242 | 3.669910809  | 0.044132154  | -0.352108471 | 0.440372779  |
| 339761 | 3.127737875  | 3.136327  | 3.119148782  | 1.434979174  | 1.939746065  | 0.930212283  |
| 339803 | 3.880357111  | 6.4148936 | 5.147625378  | 2.169424975  | 2.147539136  | 2.191310813  |
| 339942 | 8.711026868  | 5.226349  | 6.968687949  | 1.727216326  | 4.498327471  | -1.04389482  |
| 339978 | -0.352108471 | -0.352108 | -0.352108471 | 3.95685111   | 8.150431651  | 6.053641381  |
| 340017 | 4.049772207  | 3.8700402 | 3.690308212  | 1.454895716  | 2.100935855  | 0.808855576  |
| 340037 | 7.49297876   | 5.3384256 | 6.415702196  | 8.228727163  | 5.361327173  | 6.795027168  |
| 340061 | -0.352108471 | -0.352108 | -0.352108471 | 7.99704284   | 3.582482612  | 5.789762726  |
| 340073 | -0.352108471 | -0.352108 | -0.352108471 | 4.121011163  | 0.384225261  | 2.252618212  |
| 340075 | 6.697817748  | 6.2420483 | 5.78627881   | 4.178899946  | 4.245214285  | 4.112585606  |
| 340152 | 7.041446928  | 7.3790314 | 7.716615823  | 8.94690497   | 6.823749242  | 4.700593514  |
| 340273 | 6.818462795  | 6.4622499 | 6.106036957  | 5.775068216  | 4.705420536  | 6.844715896  |
| 340351 | -0.099919723 | 2.5886014 | 5.277122618  | -0.352108471 | -0.352108471 | -0.352108471 |
| 340371 | -0.352108471 | -0.352108 | -0.352108471 | 6.735779686  | 6.750862801  | 6.720696571  |
| 340393 | -0.352108471 | -0.352108 | -0.352108471 | 3.010220895  | 3.919505936  | 2.100935855  |
| 340481 | -0.352108471 | -0.352108 | -0.352108471 | 7.925731627  | 5.745394463  | 3.565057299  |
| 340515 | 8.905428127  | 6.1455725 | 3.385716844  | 6.449221091  | 7.025789768  | 5.872652414  |
| 340533 | -0.352108471 | -0.352108 | -0.352108471 | 5.958359385  | 5.958359385  | 5.958359385  |
| 340544 | 5.793507601  | 5.980334  | 6.167160455  | -0.352108471 | -0.352108471 | -0.352108471 |
| 340554 | 5.238877031  | 4.7541814 | 5.723572646  | 4.931330546  | 3.337746555  | 6.524914536  |
| 340990 | 2.313941724  | -0.352108 | 4.979991919  | -0.352108471 | -0.352108471 | -0.352108471 |
| 341116 | 6.73041029   | 7.464791  | 5.996029598  | 5.636809111  | 8.474414172  | 2.799204049  |
| 341350 | 4.780758256  | 6.9251167 | 5.852937462  | -0.352108471 | -0.352108471 | -0.352108471 |
| 341567 | 5.50246231   | 5.4283939 | 5.354325438  | -0.352108471 | -0.352108471 | -0.352108471 |
| 341640 | 7.355359934  | 6.9008997 | 6.446439397  | 0.289051906  | -0.352108471 | 0.930212283  |
| 341676 | 7.315389875  | 7.4989721 | 7.407180969  | 4.78551164   | 5.29703662   | 5.808561601  |
| 341880 | 2.588601447  | -0.352108 | 5.529311366  | -0.352108471 | -0.352108471 | -0.352108471 |
| 341883 | -0.352108471 | -0.352108 | -0.352108471 | 4.406177525  | 3.432834346  | 3.919505936  |
| 342346 | -0.352108471 | -0.352108 | -0.352108471 | 3.052703383  | 1.286146567  | 2.169424975  |
| 342510 | 5.595499658  | 6.1558333 | 5.035166055  | 4.435075177  | 3.615460478  | 5.254689875  |

|        |              |           |              |              |              |              |
|--------|--------------|-----------|--------------|--------------|--------------|--------------|
| 342666 | 3.665625461  | 5.6251608 | 7.584696082  | -0.352108471 | -0.352108471 | -0.352108471 |
| 342667 | 6.488500116  | 8.6699101 | 4.307090083  | 5.906610812  | 6.035359514  | 6.164108217  |
| 342892 | 8.207676013  | 8.3316688 | 8.083683208  | 6.171506005  | 7.50680485   | 8.842103695  |
| 342909 | 5.90029238   | 3.1465831 | 8.654001689  | -0.352108471 | -0.352108471 | -0.352108471 |
| 342931 | -0.352108471 | -0.352108 | -0.352108471 | 5.881400907  | 5.958359385  | 6.035317862  |
| 342945 | 8.913326013  | 8.7985774 | 9.028074588  | 6.980373291  | 6.698467242  | 7.26227934   |
| 343035 | 1.501017585  | 2.0673753 | 0.934659871  | 2.894004318  | 4.507115498  | 3.700559908  |
| 343071 | 6.151585628  | 5.3495815 | 6.953589722  | -0.352108471 | -0.352108471 | -0.352108471 |
| 343099 | -0.352108471 | -0.352108 | -0.352108471 | 4.80208491   | 5.732619672  | 3.871550149  |
| 343702 | -0.352108471 | -0.352108 | -0.352108471 | 3.919505936  | 3.919505936  | 3.919505936  |
| 343990 | 5.718459767  | 5.767563  | 5.66935658   | -0.352108471 | -0.352108471 | -0.352108471 |
| 344148 | -0.352108471 | -0.352108 | -0.352108471 | 6.266367194  | 6.276856601  | 6.255877787  |
| 344167 | 5.284974356  | 5.5386607 | 5.03128799   | -0.352108471 | -0.352108471 | -0.352108471 |
| 344558 | -0.352108471 | -0.352108 | -0.352108471 | 4.166562338  | 7.412963114  | 5.789762726  |
| 345275 | 8.370773408  | 6.911093  | 7.640933204  | 6.339527978  | 5.305335104  | 7.373720851  |
| 345557 | 6.382873477  | 6.3885363 | 6.377210621  | 1.245740716  | 2.051108653  | 0.440372779  |
| 345778 | 8.470882879  | 7.0721259 | 5.673368997  | 4.570078915  | 6.270222109  | 7.970365302  |
| 345895 | 5.749402114  | 6.1636281 | 5.335176159  | -0.352108471 | -0.352108471 | -0.352108471 |
| 346288 | 6.915292282  | 6.9037827 | 6.926801914  | 3.476124269  | 2.051108653  | 4.901139884  |
| 346389 | 9.64447658   | 8.1868367 | 6.729196837  | 7.255035575  | 9.879455564  | 4.630615586  |
| 346653 | 7.649685617  | 7.3519683 | 7.054251025  | 6.669574409  | 6.711909172  | 6.690741791  |
| 347487 | 8.332297558  | 5.7743703 | 3.21644308   | -0.352108471 | -0.352108471 | -0.352108471 |
| 347688 | 2.451290702  | 2.4671772 | 2.435404203  | -0.352108471 | -0.352108471 | -0.352108471 |
| 347689 | -0.352108471 | -0.352108 | -0.352108471 | 6.415928975  | 6.178370298  | 6.653487652  |
| 347734 | 7.121700748  | 7.3241242 | 7.526547652  | 7.18608445   | 6.923117079  | 7.054600764  |
| 347735 | 2.15990226   | 4.671913  | -0.352108471 | 2.881537061  | 4.954218546  | 0.808855576  |
| 347736 | 8.702558087  | 1.3190906 | 5.010824335  | 0.044132154  | 0.440372779  | -0.352108471 |
| 347746 | 4.485691727  | 5.8654274 | 7.245162993  | 6.462887111  | 5.38675695   | 4.31062679   |
| 347862 | 8.933537848  | 7.4644335 | 10.40264219  | 8.453031314  | 7.737339536  | 9.168723093  |
| 347902 | -0.352108471 | -0.352108 | -0.352108471 | 5.859617369  | 4.824058724  | 6.895176014  |
| 348013 | 5.089412202  | 2.3809248 | 7.797899595  | -0.352108471 | -0.352108471 | -0.352108471 |
| 348094 | 4.431503209  | 4.9393624 | 5.447221659  | 0.044132154  | 0.440372779  | -0.352108471 |
| 348110 | 6.757119757  | 6.4105853 | 7.103654244  | 4.432495672  | 3.119148782  | 5.745842563  |
| 348180 | -0.352108471 | -0.352108 | -0.352108471 | 4.061959707  | 4.780236561  | 5.498513415  |
| 348235 | 6.093289078  | 5.9583594 | 6.228218771  | 1.796938968  | 0.440372779  | 3.153505157  |
| 348262 | -0.352108471 | -0.352108 | -0.352108471 | 8.037412925  | 6.382873477  | 4.728334029  |
| 348654 | -0.358485819 | 2.2010365 | 4.760558764  | 5.284974356  | 4.061574733  | 6.508373979  |
| 348761 | -0.352108471 | -0.352108 | -0.352108471 | 2.703061684  | 1.127962105  | 4.278161263  |
| 349075 | 8.407090464  | 7.3900289 | 7.898559703  | 7.053015042  | 7.04373608   | 7.034457117  |
| 349114 | 3.994291929  | 4.5497284 | 5.105164781  | 6.178600791  | 7.626150042  | 9.073699293  |
| 349152 | 8.526484284  | 10.338137 | 9.432310685  | 8.182869201  | 9.796328561  | 6.56940984   |
| 349196 | 5.591305588  | 6.6876112 | 4.495000015  | 8.858862914  | 7.21467292   | 5.570482926  |
| 349408 | 5.817359515  | 4.9140225 | 6.720696571  | 0.95025487   | 2.252618212  | -0.352108471 |
| 349667 | -0.352108471 | -0.352108 | -0.352108471 | 1.054964352  | 9.968764191  | 5.511864271  |
| 353088 | 5.70586317   | 5.2437595 | 6.167966808  | 3.572335178  | 1.997577452  | 5.147092904  |
| 353091 | -0.352108471 | -0.352108 | -0.352108471 | 4.465359657  | 2.108978996  | 6.821740319  |
| 353116 | -0.352108471 | -0.352108 | -0.352108471 | 6.204656258  | 6.215464554  | 6.193847962  |

|        |              |           |              |              |              |              |
|--------|--------------|-----------|--------------|--------------|--------------|--------------|
| 353132 | 6.967968685  | 3.8888191 | 5.428393874  | -0.352108471 | -0.352108471 | -0.352108471 |
| 353135 | -0.352108471 | -0.352108 | -0.352108471 | 4.791602495  | 5.393523004  | 5.995443514  |
| 353274 | 4.320213968  | 4.4826926 | 4.64517115   | 2.841536824  | 2.354923042  | 3.328150606  |
| 353324 | -0.352108471 | -0.352108 | -0.352108471 | 0.897715333  | -0.352108471 | 2.147539136  |
| 359710 | 4.792303669  | 4.8304259 | 4.754181416  | -0.352108471 | -0.352108471 | -0.352108471 |
| 359822 | 5.394799792  | 7.6445481 | 6.519673958  | -0.352108471 | -0.352108471 | -0.352108471 |
| 359845 | 7.799978222  | 7.0724845 | 7.436231365  | 7.888903002  | 7.939085645  | 7.838720358  |
| 360132 | 3.245235305  | 1.0177121 | 5.472758546  | 0.919601171  | 2.191310813  | -0.352108471 |
| 373156 | 8.165812357  | 4.5725008 | 6.369156591  | 5.169157826  | 5.191222747  | 5.147092904  |
| 374291 | 7.885404347  | 6.7425639 | 7.313984131  | 6.829307464  | 5.363218811  | 8.295396116  |
| 374354 | 1.392109249  | 3.136327  | -0.352108471 | 6.40631083   | 6.429470164  | 6.383151496  |
| 374378 | 8.680523657  | 6.6400194 | 4.599515128  | 0.440372779  | 0.440372779  | 0.440372779  |
| 374383 | -0.352108471 | -0.352108 | -0.352108471 | 4.615990409  | 6.104429468  | 7.592868526  |
| 374393 | 6.672770329  | 7.9264733 | 5.41906734   | 1.493791735  | 1.437859363  | 1.549724107  |
| 374395 | -0.352108471 | -0.352108 | -0.352108471 | 4.64557448   | 7.128427499  | 5.88700099   |
| 374491 | 9.562332258  | 6.2297216 | 2.897110969  | -0.352108471 | -0.352108471 | -0.352108471 |
| 374654 | -0.352108471 | -0.352108 | -0.352108471 | 2.19005738   | 2.232575625  | 2.147539136  |
| 374655 | -0.352108471 | -0.352108 | -0.352108471 | 4.927679215  | 4.910392912  | 4.944965518  |
| 374666 | 8.75705839   | 6.7464901 | 4.735921722  | 5.390627963  | 6.769929259  | 6.080278611  |
| 374786 | -0.352108471 | -0.352108 | -0.352108471 | 0.897715333  | 2.147539136  | -0.352108471 |
| 374872 | 7.899526545  | 6.8372257 | 8.961827422  | 6.695682134  | 6.010880884  | 7.380483383  |
| 374875 | 7.673892538  | 2.7610897 | 5.217491139  | -0.352108471 | -0.352108471 | -0.352108471 |
| 374882 | -0.352108471 | -0.352108 | -0.352108471 | 3.136326969  | 3.451602177  | 2.821051762  |
| 374918 | -0.352108471 | -0.352108 | -0.352108471 | 2.313941724  | -0.352108471 | 4.979991919  |
| 374946 | 4.522024694  | 4.7482189 | 4.295830461  | 5.218487673  | 2.86382517   | 4.041156422  |
| 374969 | -0.352108471 | -0.352108 | -0.352108471 | 6.396868383  | 5.174358637  | 7.619378128  |
| 374987 | 7.041242604  | 9.1457521 | 8.093497364  | 7.503651391  | 7.40365293   | 7.603649851  |
| 375033 | 6.10840822   | 6.8961178 | 6.502263028  | 5.954381829  | 7.140810338  | 8.327238847  |
| 375056 | -0.352108471 | -0.352108 | -0.352108471 | 1.931562613  | 2.469725738  | 3.007888862  |
| 375133 | 5.439724472  | 5.825168  | 5.054280952  | -0.352108471 | -0.352108471 | -0.352108471 |
| 375260 | -0.352108471 | -0.352108 | -0.352108471 | 1.315841796  | 2.191310813  | 0.440372779  |
| 375316 | 2.565254368  | 2.6857321 | 2.806209807  | -0.352108471 | -0.352108471 | -0.352108471 |
| 375341 | 2.39854798   | 4.3359198 | 6.273291662  | 6.43311159   | 2.980811522  | 4.706961556  |
| 375346 | -0.352108471 | -0.352108 | -0.352108471 | 5.388940365  | 7.538409465  | 6.463674915  |
| 375449 | 3.636824788  | 3.9195059 | 3.354143641  | 3.73714403   | 3.919505936  | 3.554782125  |
| 375607 | 2.564903039  | 6.7737408 | 10.98257852  | 2.252618212  | 5.288688167  | -0.783451744 |
| 375719 | 6.735779686  | 5.6002971 | 7.871262272  | 3.511085416  | 7.405424712  | 5.458255064  |
| 375743 | -0.352108471 | -0.352108 | -0.352108471 | 5.760537073  | 6.140363555  | 5.380710591  |
| 375757 | 3.09617961   | 5.3835036 | 0.808855576  | -0.352108471 | -0.352108471 | -0.352108471 |
| 375775 | 2.760618758  | 3.2496536 | 2.271583904  | -0.352108471 | -0.352108471 | -0.352108471 |
| 375790 | 7.356612843  | 7.4168994 | 7.477186034  | 2.679906795  | 4.490335807  | 3.585121301  |
| 375940 | 5.489583732  | 5.2401543 | 5.739013132  | 3.14058393   | 4.907473824  | 1.373694036  |
| 376267 | 5.217491139  | 3.6138225 | 6.821159738  | -0.352108471 | -0.352108471 | -0.352108471 |
| 376497 | 5.386086779  | 5.9757535 | 5.680920151  | 5.442167957  | 5.989336366  | 4.894999547  |
| 376940 | -0.352108471 | -0.352108 | -0.352108471 | 3.278324455  | 2.920396231  | 3.099360343  |
| 377007 | 6.999048955  | 8.5482214 | 5.449876507  | 1.05704313   | 1.305230684  | 0.808855576  |
| 377677 | 6.341498931  | 6.1774288 | 6.505569015  | 5.798409829  | 5.830939431  | 5.863469032  |

|        |              |           |              |              |              |              |
|--------|--------------|-----------|--------------|--------------|--------------|--------------|
| 378708 | -0.352108471 | -0.352108 | -0.352108471 | 5.573088363  | 5.873882669  | 5.723485516  |
| 378884 | -0.352108471 | -0.352108 | -0.352108471 | 4.412766833  | 3.585121301  | 2.757475769  |
| 378938 | 9.231166605  | 9.8495588 | 8.612774406  | 6.450640055  | 6.91500483   | 6.682822443  |
| 379013 | 5.334238245  | 6.0672699 | 4.601206613  | 3.060467316  | 5.369285173  | 7.67810303   |
| 379025 | 7.946946324  | 3.8536384 | 5.90029238   | 0.808855576  | 0.808855576  | 0.808855576  |
| 386597 | 6.754017386  | 5.825168  | 7.682866779  | 5.840199482  | 6.276856601  | 5.403542364  |
| 386680 | 5.625160771  | 5.6532998 | 5.597021732  | -0.352108471 | -0.352108471 | -0.352108471 |
| 387032 | 4.731342239  | 7.6771131 | 1.785571376  | 5.37974618   | 6.034696055  | 5.707221118  |
| 387066 | -0.352108471 | -0.352108 | -0.352108471 | 6.524513748  | 8.180960262  | 4.868067234  |
| 387129 | 5.749402114  | 6.1835825 | 5.315221752  | -0.352108471 | -0.352108471 | -0.352108471 |
| 387254 | 8.165341174  | 8.4909014 | 7.83978098   | 6.689783396  | 7.044177561  | 6.33538923   |
| 387521 | 6.37092775   | 6.9451187 | 6.658023207  | 6.463674915  | 7.366860182  | 5.560489648  |
| 387522 | 4.749794444  | 7.2863246 | 9.82285485   | 8.556463087  | 8.522554666  | 8.539508877  |
| 387590 | 1.392109249  | 3.136327  | -0.352108471 | 6.530787144  | 5.156185365  | 5.843486254  |
| 387628 | -0.352108471 | -0.352108 | -0.352108471 | 5.12763925   | 4.401599365  | 5.853679134  |
| 387640 | 5.866795484  | 5.7752316 | 5.958359385  | 6.193241632  | 5.665786693  | 6.720696571  |
| 387644 | 5.013999274  | 6.1348006 | 7.255601956  | -0.352108471 | -0.352108471 | -0.352108471 |
| 387680 | -0.352108471 | -0.352108 | -0.352108471 | 6.022050925  | 4.800821405  | 7.243280445  |
| 387700 | 5.924443035  | 3.8926146 | 7.95627143   | 3.167132307  | 2.677192416  | 2.922162362  |
| 387715 | 6.991795048  | 6.9981067 | 6.985483415  | -0.352108471 | -0.352108471 | -0.352108471 |
| 387723 | 4.215160124  | 5.2666288 | 3.163691446  | 3.305582051  | 2.024343053  | 0.743104054  |
| 387751 | 4.588632431  | 5.9079759 | 5.248304154  | 0.044132154  | -0.352108471 | 0.440372779  |
| 387763 | 8.001538821  | 7.2774479 | 6.553356947  | -0.352108471 | -0.352108471 | -0.352108471 |
| 387775 | -0.352108471 | -0.352108 | -0.352108471 | 2.38621749   | 5.124543452  | -0.352108471 |
| 387882 | 7.757984028  | 8.40528   | 7.110688051  | 8.620205222  | 8.834935583  | 9.049665945  |
| 387890 | 6.048656227  | 4.255838  | 5.152247113  | -0.352108471 | -0.352108471 | -0.352108471 |
| 387893 | 7.472932879  | 7.4969383 | 7.520943807  | -0.352108471 | -0.352108471 | -0.352108471 |
| 387921 | 6.433318728  | 6.4453648 | 6.421272681  | -0.352108471 | -0.352108471 | -0.352108471 |
| 387978 | 4.965407552  | 6.0898692 | 5.527638398  | 3.59721797   | 3.298692349  | 3.895743592  |
| 388022 | 6.573968999  | 7.0550105 | 6.092927453  | 6.791733532  | 6.022050925  | 5.252368318  |
| 388121 | 4.544261391  | 4.1770731 | 4.911449657  | 6.32455531   | 7.795331321  | 4.853779299  |
| 388135 | 9.215787766  | 6.8576915 | 4.499595184  | 0.872801732  | 0.440372779  | 1.305230684  |
| 388152 | -0.352108471 | -0.352108 | -0.352108471 | 4.422006664  | 4.691916222  | 4.961825779  |
| 388165 | 6.27334292   | 7.2976226 | 8.321902227  | 6.554330238  | 5.138271466  | 3.722212694  |
| 388228 | 9.417135542  | 7.3757444 | 5.334353338  | 6.747834851  | 4.394649049  | 9.101020653  |
| 388324 | -0.352108471 | -0.352108 | -0.352108471 | 2.910985799  | 2.316018402  | 3.505953196  |
| 388325 | 4.26871449   | 4.617923  | 3.919505936  | 5.665568776  | 5.054280952  | 6.276856601  |
| 388419 | -0.352108471 | -0.352108 | -0.352108471 | 3.309106943  | 4.178899946  | 5.048692948  |
| 388507 | 6.629948642  | 5.8445443 | 7.415353029  | 8.685420125  | 5.430149742  | 2.174879358  |
| 388524 | -0.352108471 | -0.352108 | -0.352108471 | 5.902763525  | 5.930745839  | 5.916754682  |
| 388550 | 7.319411632  | 9.8820533 | 8.600732457  | 6.622651635  | 6.742736775  | 6.862821915  |
| 388561 | 6.260458727  | 6.3228896 | 6.198027805  | 1.622906063  | 1.807952763  | 1.437859363  |
| 388566 | 5.931810751  | 4.2476963 | 7.615925233  | 0.228373553  | -0.352108471 | 0.808855576  |
| 388567 | 6.184820943  | 4.7351884 | 7.634453473  | 2.555275869  | 7.285397695  | 4.920336782  |
| 388574 | 7.807259768  | 6.6766342 | 5.546008598  | 1.796938968  | 3.058439447  | 0.535438489  |
| 388610 | 3.198776722  | 3.056699  | 3.127737875  | 8.025088431  | 8.143182825  | 7.906994037  |
| 388630 | 5.428393874  | 7.9666038 | 2.890183904  | -0.352108471 | -0.352108471 | -0.352108471 |



|        |              |           |              |              |              |              |
|--------|--------------|-----------|--------------|--------------|--------------|--------------|
| 388685 | 4.363953422  | 5.5304556 | 3.197451278  | 1.845238787  | 2.252618212  | 1.437859363  |
| 388697 | 4.875457945  | 5.5595243 | 5.217491139  | 5.359431903  | 6.843135165  | 8.326838427  |
| 388698 | 4.679717253  | 5.7740431 | 6.868369027  | 2.216380688  | 2.166656576  | 2.116932463  |
| 388714 | 6.382873477  | 6.4105853 | 6.355161685  | -0.352108471 | -0.352108471 | -0.352108471 |
| 388753 | 5.499998698  | 6.8018138 | 8.10362885   | -0.352108471 | -0.352108471 | -0.352108471 |
| 388759 | 10.71585968  | 8.4119555 | 6.10805132   | 5.782387296  | 8.512487973  | 7.147437635  |
| 388789 | 6.656125064  | 6.6538708 | 6.658379305  | 0.044132154  | 0.440372779  | -0.352108471 |
| 388910 | -0.352108471 | -0.352108 | -0.352108471 | 3.067782853  | 4.178899946  | 5.290017039  |
| 388960 | 5.55876787   | 5.3064074 | 5.811128349  | -0.352108471 | -0.352108471 | -0.352108471 |
| 388962 | -0.352108471 | -0.352108 | -0.352108471 | 5.923493182  | 5.926961306  | 5.920025058  |
| 389015 | 10.66586667  | 9.9918964 | 9.317926137  | 8.747524246  | 8.974741184  | 9.201958122  |
| 389072 | 6.698034342  | 5.3258163 | 8.070252354  | 2.266276845  | 1.885767663  | 2.076022254  |
| 389114 | 7.811489345  | 7.6453965 | 7.479303716  | 8.244065921  | 6.353429101  | 4.462792281  |
| 389119 | 7.137806146  | 3.4321426 | 5.284974356  | -0.352108471 | -0.352108471 | -0.352108471 |
| 389136 | -0.352108471 | -0.352108 | -0.352108471 | 3.253610347  | 7.626224528  | 5.439917437  |
| 389152 | 4.753865155  | 6.7541357 | 2.753594626  | 1.394345699  | 1.14221151   | 1.646479888  |
| 389197 | 7.57364657   | 5.1646666 | 6.369156591  | -0.352108471 | -0.352108471 | -0.352108471 |
| 389206 | -0.352108471 | -0.352108 | -0.352108471 | 2.519010526  | 5.325716078  | 8.13242163   |
| 389400 | 2.413921152  | 5.1799508 | -0.352108471 | 0.624614178  | 0.440372779  | 0.808855576  |
| 389421 | 7.112120745  | 7.5624965 | 6.661744953  | -0.352108471 | -0.352108471 | -0.352108471 |
| 389432 | 6.975263409  | 6.5711063 | 6.166949167  | 5.621110071  | 6.269885154  | 4.972334989  |
| 389493 | 3.368266788  | 2.065292  | 0.7623173    | 2.258253426  | 1.791107639  | 2.024680532  |
| 389524 | 5.124543452  | 6.9431196 | 3.305967298  | -0.352108471 | -0.352108471 | -0.352108471 |
| 389538 | 7.059808236  | 5.6251608 | 4.190513307  | -0.352108471 | -0.352108471 | -0.352108471 |
| 389541 | -0.352108471 | -0.352108 | -0.352108471 | 8.873628679  | 5.906733668  | 2.939838657  |
| 389610 | 2.448539722  | 1.7836987 | 1.118857742  | 3.222716608  | 1.157398153  | 2.19005738   |
| 389630 | -0.352108471 | -0.352108 | -0.352108471 | 4.279634776  | 5.493783215  | 6.707931654  |
| 389641 | 6.396586133  | 6.1999612 | 6.593211042  | 6.236695219  | 6.515031054  | 5.958359385  |
| 389643 | 5.479009326  | 7.1421903 | 8.805371273  | 6.676379606  | 7.77424412   | 5.578515091  |
| 389649 | 8.168574184  | 7.3237146 | 6.478854952  | 1.75605734   | 5.915852686  | 10.07564803  |
| 389668 | 9.779340729  | 9.4665024 | 9.153664131  | 8.415109911  | 7.066723123  | 9.763496699  |
| 389715 | 2.84317252   | 4.1587613 | 1.527583775  | -0.352108471 | -0.352108471 | -0.352108471 |
| 389741 | -0.352108471 | -0.352108 | -0.352108471 | 5.541826516  | 4.64902146   | 5.095423988  |
| 389763 | 6.573968999  | 7.584828  | 5.563110022  | -0.352108471 | -0.352108471 | -0.352108471 |
| 389791 | 7.33996113   | 9.8328566 | 4.847065677  | 7.371735579  | 5.886743097  | 4.401750616  |
| 389792 | 8.316249499  | 8.4650242 | 8.167474822  | 4.833992389  | 5.723485516  | 6.612978643  |
| 389813 | -0.352108471 | -0.352108 | -0.352108471 | 5.679357672  | 4.803908551  | 5.241633112  |
| 389834 | 4.103052932  | 8.408891  | 6.255971957  | 3.366593439  | 5.412561087  | 7.458528736  |
| 389941 | -0.352108471 | -0.352108 | -0.352108471 | 5.575983727  | 7.574097512  | 3.577869941  |
| 390066 | -0.352108471 | -0.352108 | -0.352108471 | 6.818185735  | 5.284974356  | 3.751762977  |
| 390079 | 6.373808137  | 6.9744496 | 6.674128879  | -0.352108471 | -0.352108471 | -0.352108471 |
| 390142 | 7.772618403  | 4.2681438 | 6.020381091  | -0.352108471 | -0.352108471 | -0.352108471 |
| 390157 | -0.352108471 | -0.352108 | -0.352108471 | 9.270304069  | 2.372517607  | 5.821410838  |
| 390226 | 3.662601802  | 2.3139417 | 0.965281646  | -0.352108471 | -0.352108471 | -0.352108471 |
| 390231 | 9.008734332  | 3.3591937 | 6.183964016  | -0.352108471 | -0.352108471 | -0.352108471 |
| 390275 | 5.635826733  | 5.220961  | 5.428393874  | -0.352108471 | -0.352108471 | -0.352108471 |
| 390539 | -0.352108471 | -0.352108 | -0.352108471 | 0.897715333  | 2.147539136  | -0.352108471 |

|        |              |           |              |              |              |              |
|--------|--------------|-----------|--------------|--------------|--------------|--------------|
| 390756 | 5.625160771  | 5.7206083 | 5.529713276  | -0.352108471 | -0.352108471 | -0.352108471 |
| 390874 | -0.352108471 | -0.352108 | -0.352108471 | -0.312499197 | 1.995427359  | 4.303353916  |
| 390963 | 8.605093366  | 7.5773131 | 6.549532778  | 6.509185427  | 6.391863632  | 6.626507221  |
| 390980 | 9.457492045  | 8.5534723 | 10.36151175  | 8.391506486  | 8.007595937  | 8.199551212  |
| 391627 | -0.352108471 | -0.352108 | -0.352108471 | 2.38621749   | 5.124543452  | -0.352108471 |
| 392196 | -0.352108471 | -0.352108 | -0.352108471 | 5.392083658  | 4.463274772  | 4.927679215  |
| 392862 | -0.352108471 | -0.352108 | -0.352108471 | 2.38621749   | 5.124543452  | -0.352108471 |
| 399473 | 5.962072235  | 9.0309213 | 7.496496758  | 4.158869237  | 5.709659516  | 2.608078959  |
| 399664 | -0.352108471 | -0.352108 | -0.352108471 | 5.712263427  | 4.304918356  | 7.119608499  |
| 399665 | -0.352108471 | -0.352108 | -0.352108471 | 3.606517346  | 5.336173319  | 1.876861374  |
| 399746 | 5.428393874  | 5.3775666 | 5.479221111  | -0.352108471 | -0.352108471 | -0.352108471 |
| 399761 | 7.906244879  | 8.0182569 | 8.130269011  | 2.820330831  | 5.780693203  | 8.741055575  |
| 399814 | -0.352108471 | -0.352108 | -0.352108471 | 2.295316925  | 4.877311541  | 7.459306156  |
| 399823 | -0.352108471 | -0.352108 | -0.352108471 | 9.656491579  | 6.022050925  | 2.387610271  |
| 399844 | 4.201099247  | 4.4826926 | 3.919505936  | 2.424859109  | 3.919505936  | 0.930212283  |
| 399881 | -0.352108471 | -0.352108 | -0.352108471 | 2.239979033  | 3.337746555  | 1.14221151   |
| 399886 | 1.480940338  | 1.2861    | 1.383520155  | 2.217487623  | 2.118278685  | 2.019069748  |
| 399900 | -0.352108471 | -0.352108 | -0.352108471 | 5.564420131  | 5.005528582  | 5.284974356  |
| 399909 | -0.352108471 | -0.352108 | -0.352108471 | 7.072591202  | 5.308348614  | 3.544106026  |
| 399923 | 7.891723217  | 8.1005797 | 7.682866779  | 6.900179493  | 6.720696571  | 7.079662414  |
| 399947 | -0.352108471 | -0.352108 | -0.352108471 | 3.680127125  | 3.392883967  | 3.536505546  |
| 399948 | 6.142386792  | 4.5685245 | 5.355455665  | -0.352108471 | -0.352108471 | -0.352108471 |
| 399959 | 4.238176943  | 5.4275895 | 6.617002076  | 6.12990004   | 7.41376259   | 4.84603749   |
| 399968 | -0.352108471 | -0.352108 | -0.352108471 | 1.70308327   | 1.305230684  | 2.100935855  |
| 399979 | -0.352108471 | -0.352108 | -0.352108471 | 7.371677012  | 7.555244212  | 7.188109812  |
| 400002 | 9.88683101   | 7.3398659 | 8.613348453  | 7.994024596  | 7.103411138  | 6.21279768   |
| 400121 | 5.600886829  | 10.190542 | 7.895714382  | 6.695905193  | 6.662724824  | 6.729085562  |
| 400212 | 9.016534868  | 8.8378292 | 9.195240516  | 7.31878593   | 7.718422267  | 8.118058603  |
| 400322 | -0.352108471 | -0.352108 | -0.352108471 | 2.969210976  | 2.451290702  | 1.933370429  |
| 400456 | 2.289786469  | 0.494432  | 1.392109249  | 1.190059422  | 1.939746065  | 0.440372779  |
| 400506 | -0.352108471 | -0.352108 | -0.352108471 | 4.800358203  | 6.842463472  | 5.821410838  |
| 400508 | 5.316006598  | 5.4275895 | 5.539172421  | 2.676064501  | 0.605398724  | 1.640731613  |
| 400511 | 6.569257994  | 6.7355253 | 6.402990729  | 1.515574069  | 2.100935855  | 0.930212283  |
| 400548 | 1.169379371  | 1.5010176 | 1.832655798  | 4.834410909  | 5.12763925   | 5.420867591  |
| 400612 | 5.645995832  | 6.1507978 | 6.655599813  | 6.910262313  | 5.154689539  | 3.399116766  |
| 400618 | 5.869947055  | 4.513304  | 3.15666101   | 1.290035436  | 1.437859363  | 1.14221151   |
| 400644 | 7.428545491  | 7.1481148 | 6.867684036  | 6.260418718  | 6.114415754  | 5.968412789  |
| 400655 | 5.128962071  | 3.7642422 | 6.493681965  | 5.168494212  | 6.753916436  | 3.583071987  |
| 400657 | 4.867086667  | 4.9799919 | 4.754181416  | 5.460434222  | 5.605609608  | 5.315258837  |
| 400661 | -0.352108471 | -0.352108 | -0.352108471 | 2.546513039  | 3.144652207  | 3.742791374  |
| 400682 | 6.173779995  | 6.5150311 | 5.832528937  | 5.852120102  | 5.665786693  | 6.038453511  |
| 400706 | 5.633353739  | 5.7752316 | 5.917109427  | 4.02845604   | 3.494843976  | 4.562068104  |
| 400745 | -0.352108471 | -0.352108 | -0.352108471 | 6.679894429  | 4.841179717  | 5.760537073  |
| 400748 | 5.854321977  | 6.5707504 | 6.212536209  | -0.352108471 | -0.352108471 | -0.352108471 |
| 400765 | -0.352108471 | -0.352108 | -0.352108471 | 1.400698343  | -0.352108471 | 3.153505157  |
| 400798 | 5.240497058  | 4.4585636 | 3.676630217  | 5.637895348  | 5.665251835  | 5.692608323  |
| 400804 | 5.317370559  | 5.3733719 | 5.261369182  | 8.212531249  | 3.391602615  | 5.802066932  |

|        |              |           |              |              |              |              |
|--------|--------------|-----------|--------------|--------------|--------------|--------------|
| 400818 | 4.578801146  | 2.8888006 | 6.268801658  | -0.352108471 | -0.352108471 | -0.352108471 |
| 400870 | 5.625160771  | 5.6532998 | 5.597021732  | -0.352108471 | -0.352108471 | -0.352108471 |
| 400892 | 10.77262473  | 5.0114009 | 7.892012834  | 2.146123334  | 2.100935855  | 2.191310813  |
| 400931 | 8.150175441  | 8.0660974 | 8.234253481  | 4.231032423  | 2.686833264  | 5.775231583  |
| 400941 | 8.890478571  | 6.9675112 | 5.044543919  | 1.76984594   | 1.807952763  | 1.731739118  |
| 400950 | 8.261905243  | 7.2592056 | 9.264604849  | 9.217452168  | 7.556075917  | 5.894699666  |
| 400955 | 4.803618005  | 2.8367941 | 6.770441956  | 0.044132154  | -0.352108471 | 0.440372779  |
| 400958 | 8.009356603  | 6.5108061 | 9.507907069  | 5.485123609  | 6.382521369  | 4.587725849  |
| 400961 | -0.352108471 | -0.352108 | -0.352108471 | 4.178899946  | 6.049178256  | 2.308621635  |
| 401010 | -0.352108471 | -0.352108 | -0.352108471 | 4.653681558  | 6.867392588  | 5.760537073  |
| 401014 | 5.017136436  | 5.054281  | 4.979991919  | -0.352108471 | -0.352108471 | -0.352108471 |
| 401024 | 5.800199788  | 4.4099411 | 7.190458438  | -0.352108471 | -0.352108471 | -0.352108471 |
| 401039 | 3.894362219  | 3.6761388 | 4.112585606  | 4.248750405  | 5.233567424  | 6.218384442  |
| 401052 | 7.244863824  | 7.1815515 | 7.118239191  | 5.579072611  | 6.747774898  | 6.163423754  |
| 401081 | -0.352108471 | -0.352108 | -0.352108471 | 5.169157826  | 7.148437129  | 3.189878523  |
| 401082 | 4.922996633  | 5.8432369 | 6.763477202  | 8.063390227  | 6.095756386  | 7.079573307  |
| 401089 | 5.015650258  | 4.6339339 | 5.397366655  | 6.594402602  | 5.537609977  | 4.480817351  |
| 401093 | -0.352108471 | -0.352108 | -0.352108471 | 5.903760504  | 7.015128477  | 4.792392531  |
| 401105 | 6.000247872  | 6.6020516 | 5.398444155  | 1.518484901  | 1.731739118  | 1.305230684  |
| 401152 | -0.395259066 | 1.3835202 | 3.162299376  | 4.175292888  | 5.366700028  | 2.983885747  |
| 401176 | -0.352108471 | -0.352108 | -0.352108471 | 6.003978506  | 6.002308672  | 6.005648339  |
| 401232 | 5.824288785  | 5.873346  | 5.775231583  | 4.967105233  | 4.954218546  | 4.979991919  |
| 401233 | 7.521934454  | 7.1829284 | 7.860940545  | 1.917379553  | 2.242596918  | 2.567814284  |
| 401242 | 9.008306653  | 7.2202022 | 5.432097798  | 3.805152612  | 5.359400601  | 6.913648589  |
| 401247 | 6.475702667  | 5.1238684 | 5.79978551   | 0.831589977  | 2.631888258  | 1.731739118  |
| 401250 | -0.352108471 | -0.352108 | -0.352108471 | 5.369332089  | 5.55529679   | 5.183367387  |
| 401260 | 6.829815208  | 5.9194595 | 5.009103878  | 2.102425001  | 3.245625856  | 4.388826711  |
| 401289 | 5.800199788  | 8.5657553 | 3.034644242  | -0.352108471 | -0.352108471 | -0.352108471 |
| 401317 | -0.352108471 | -0.352108 | -0.352108471 | 4.381734268  | 5.128763636  | 5.875793003  |
| 401320 | 6.415928975  | 6.4105853 | 6.421272681  | 3.086062074  | 3.919505936  | 2.252618212  |
| 401321 | 3.053533646  | 7.6920338 | 5.372783739  | 4.171144437  | 4.971504216  | 5.771863995  |
| 401324 | 5.82391272   | 5.646455  | 5.735183859  | 1.158617076  | 0.440372779  | 1.876861374  |
| 401335 | 4.890080051  | 6.1919092 | 5.540994634  | 1.835742592  | 1.939746065  | 1.731739118  |
| 401357 | 5.602389337  | 7.86917   | 6.735779686  | 4.818774833  | 6.001809131  | 7.18484343   |
| 401397 | -0.352108471 | -0.352108 | -0.352108471 | 3.022824329  | 4.103893054  | 5.18496178   |
| 401492 | 4.942352457  | 4.6711825 | 4.806767494  | 2.096182139  | 2.252618212  | 1.939746065  |
| 401505 | -0.352108471 | -0.352108 | -0.352108471 | 5.041497906  | 7.430344416  | 6.235921161  |
| 401508 | 5.438743023  | 5.0208482 | 5.229795633  | 1.540978788  | 1.14221151   | 1.939746065  |
| 401548 | 6.674128879  | 4.9710533 | 8.377204506  | -0.352108471 | -0.352108471 | -0.352108471 |
| 401554 | 5.564591206  | 6.2858739 | 4.843308497  | 0.685292531  | 0.440372779  | 0.930212283  |
| 401557 | -0.352108471 | -0.352108 | -0.352108471 | 7.281527317  | 6.799585347  | 7.040556332  |
| 401563 | 4.872224191  | 5.3447363 | 4.399712117  | -0.352108471 | -0.352108471 | -0.352108471 |
| 401588 | 1.880238567  | 4.1125856 | -0.352108471 | 1.964002179  | 3.119148782  | 0.808855576  |
| 401612 | 6.18045734   | 5.5954997 | 5.010541977  | 2.513628242  | 1.873849414  | 1.234070586  |
| 401884 | 4.731342239  | 4.9799919 | 4.482692559  | -0.352108471 | -0.352108471 | -0.352108471 |
| 401944 | 2.016914154  | 4.5203272 | -0.486498867 | 2.534742836  | 2.828965351  | 2.240520322  |
| 402381 | -0.352108471 | -0.352108 | -0.352108471 | 2.686833264  | 2.686833264  | 2.686833264  |

|        |              |           |              |              |              |              |
|--------|--------------|-----------|--------------|--------------|--------------|--------------|
| 402415 | 4.504224559  | 9.099403  | 6.801813774  | 1.075127527  | 2.211943219  | 3.348758911  |
| 402483 | 5.91576024   | 6.5251953 | 5.306325132  | 6.287192184  | 7.029403463  | 6.658297824  |
| 402665 | -0.352108471 | -0.352108 | -0.352108471 | 6.745648015  | 5.257970247  | 6.001809131  |
| 403150 | 7.94321586   | 7.7257533 | 7.834484571  | 6.498934874  | 6.325024587  | 6.672845162  |
| 403312 | 7.946261914  | 6.2345125 | 4.522763055  | 5.263851904  | 5.315258837  | 5.212444972  |
| 403315 | 2.79997354   | 4.8345008 | 6.869028154  | 6.000222335  | 8.000684573  | 3.999760097  |
| 403340 | -0.352108471 | -0.352108 | -0.352108471 | 6.392315925  | 7.547757663  | 5.236874187  |
| 404093 | -0.352108471 | -0.352108 | -0.352108471 | 5.916099984  | 5.530871047  | 5.723485516  |
| 404216 | 5.253240792  | 5.209544  | 5.296937619  | -0.352108471 | -0.352108471 | -0.352108471 |
| 404217 | 3.527916452  | 3.136327  | 3.919505936  | 5.637296679  | 5.653299811  | 5.621293547  |
| 404636 | -0.352108471 | -0.352108 | -0.352108471 | 1.90830372   | 1.939746065  | 1.876861374  |
| 404663 | 8.210570338  | 6.4503028 | 4.690035337  | 0.044132154  | -0.352108471 | 0.440372779  |
| 404672 | 9.266421739  | 6.3219796 | 7.794200678  | 9.756800082  | 5.602674288  | 7.679737185  |
| 404770 | 6.310474709  | 5.6298125 | 6.991136904  | 4.595573415  | 5.575983727  | 6.556394038  |
| 407835 | 6.285816951  | 7.4941959 | 6.890006441  | 5.502551577  | 6.68988391   | 4.315219244  |
| 414149 | 8.720252597  | 10.147192 | 7.293313201  | 7.803717181  | 7.731338116  | 7.876096247  |
| 414152 | 5.55876787   | 5.5882244 | 5.529311366  | -0.352108471 | -0.352108471 | -0.352108471 |
| 414194 | 6.746243716  | 5.4434049 | 4.140566173  | -0.352108471 | -0.352108471 | -0.352108471 |
| 414243 | 8.79574336   | 2.9101316 | 5.852937462  | -0.352108471 | -0.352108471 | -0.352108471 |
| 414245 | 9.095909055  | 3.8917756 | 6.493842351  | 8.095024939  | 6.206574219  | 4.318123499  |
| 414328 | 2.313941724  | -0.352108 | 4.979991919  | -0.352108471 | -0.352108471 | -0.352108471 |
| 414332 | 7.164576595  | 4.9470072 | 2.729437784  | 0.689815323  | -0.352108471 | 1.731739118  |
| 414777 | 5.75176029   | 4.8517347 | 3.951709059  | 4.450744817  | 3.337746555  | 5.563743079  |
| 414919 | -0.352108471 | -0.352108 | -0.352108471 | 6.75496194   | 4.722164596  | 8.787759284  |
| 415116 | -0.352108471 | -0.352108 | -0.352108471 | 6.913488898  | 3.233288032  | 10.59368976  |
| 439921 | 6.265637698  | 8.559616  | 7.412626846  | 7.64761654   | 3.887551224  | 11.40768186  |
| 439931 | -0.352108471 | -0.352108 | -0.352108471 | 0.851977332  | 2.167095551  | 1.509536442  |
| 439990 | 5.55876787   | 4.2630676 | 6.854468115  | 5.958359385  | 5.455011096  | 6.461707673  |
| 440028 | -0.352108471 | -0.352108 | -0.352108471 | 2.012200255  | 2.614704452  | 1.409696058  |
| 440041 | -0.352108471 | -0.352108 | -0.352108471 | 2.732772606  | -0.352108471 | 5.817653684  |
| 440044 | 5.238877031  | 7.6546039 | 2.823150182  | 0.395051519  | 1.14221151   | -0.352108471 |
| 440072 | 2.697410991  | 6.4427072 | 4.570059097  | 0.598807818  | 1.549724107  | -0.352108471 |
| 440101 | 1.880238567  | -0.352108 | 4.112585606  | 4.812363898  | 5.525951753  | 5.169157826  |
| 440104 | -0.352108471 | -0.352108 | -0.352108471 | 1.031973476  | 4.774008569  | 2.902991023  |
| 440119 | 5.379561447  | 4.5671969 | 3.754832449  | 1.416910214  | 1.290035436  | 1.163160659  |
| 440145 | -0.352108471 | -0.352108 | -0.352108471 | 5.739083926  | 6.00432218   | 6.269560434  |
| 440173 | 7.717613268  | 8.9785204 | 8.34806685   | 7.250260926  | 7.458340638  | 7.042181214  |
| 440193 | 6.32763073   | 4.9116502 | 3.495669687  | 0.044132154  | -0.352108471 | 0.440372779  |
| 440224 | -0.352108471 | -0.352108 | -0.352108471 | 7.249045245  | 6.975623316  | 6.702201386  |
| 440253 | 5.359791817  | 6.5678645 | 7.77593713   | 7.47489242   | 7.342696275  | 7.607088565  |
| 440275 | 4.29742836   | 4.0160458 | 3.734663182  | 7.660007451  | 7.669038175  | 7.664522813  |
| 440279 | -0.352108471 | -0.352108 | -0.352108471 | 5.903760504  | 4.41560128   | 7.391919729  |
| 440299 | 5.019282955  | 4.9140225 | 5.124543452  | 3.477522833  | 1.807952763  | 5.147092904  |
| 440300 | 10.71086806  | 9.073785  | 7.436701886  | 7.371347861  | 9.269694946  | 8.320521403  |
| 440346 | 6.195655283  | 6.4376768 | 6.679698396  | 6.687357735  | 4.774212626  | 5.730785181  |
| 440348 | -0.352108471 | -0.352108 | -0.352108471 | 8.072203794  | 6.159662462  | 4.247121129  |
| 440390 | 1.66985715   | -0.352108 | 3.69182277   | 1.995427359  | 2.051108653  | 1.939746065  |

|        |              |           |              |              |              |              |
|--------|--------------|-----------|--------------|--------------|--------------|--------------|
| 440400 | 4.615583513  | 4.671913  | 4.559254036  | 7.42546171   | 7.35252903   | 7.49839439   |
| 440416 | 7.198251027  | 5.9158527 | 4.633454344  | 1.880238567  | -0.352108471 | 4.112585606  |
| 440435 | -0.352108471 | -0.352108 | -0.352108471 | 6.128867033  | 6.235921161  | 6.342975288  |
| 440446 | 7.269123066  | 6.889091  | 7.649155172  | 7.089332346  | 7.571326142  | 8.053319937  |
| 440456 | -0.352108471 | -0.352108 | -0.352108471 | 6.117607993  | 6.496434318  | 5.738781667  |
| 440465 | 5.474014689  | 6.4527052 | 4.495324183  | 5.246137506  | 7.517055054  | 2.975219957  |
| 440482 | -0.352108471 | -0.352108 | -0.352108471 | 7.057326175  | 5.774531775  | 6.415928975  |
| 440498 | -0.352108471 | -0.352108 | -0.352108471 | 3.867053136  | 5.663737322  | 7.460421508  |
| 440503 | 5.980334028  | 7.7496405 | 4.211027585  | -0.352108471 | -0.352108471 | -0.352108471 |
| 440508 | 4.978718278  | 5.4199399 | 5.861161521  | 5.035252831  | 4.20826195   | 3.381271069  |
| 440515 | 4.892666879  | 5.9391922 | 6.985717564  | 6.6049373    | 6.675432496  | 6.534442104  |
| 440533 | 2.736529761  | 2.3742856 | 3.098773939  | 1.509536442  | -0.265997875 | 3.285070759  |
| 440556 | 6.008490517  | 4.5611367 | 5.284813592  | -0.352108471 | -0.352108471 | -0.352108471 |
| 440563 | -0.352108471 | -0.352108 | -0.352108471 | 6.130718295  | 5.243942167  | 4.35716604   |
| 440574 | 6.465214847  | 5.2689741 | 4.072733255  | 5.974328953  | 6.022050925  | 6.069772897  |
| 440594 | 8.460343176  | 8.943954  | 7.976732366  | 9.024637121  | 6.0713306    | 7.54798386   |
| 440603 | 6.451340363  | 6.7620481 | 7.072755785  | 7.253162567  | 6.736797698  | 6.994980132  |
| 440712 | 5.249224703  | 4.3097843 | 6.188665068  | -0.352108471 | -0.352108471 | -0.352108471 |
| 440822 | 6.090907831  | 5.9200251 | 6.261790604  | 3.367253076  | 5.804293869  | 0.930212283  |
| 440862 | -0.352108471 | -0.352108 | -0.352108471 | 5.663737322  | 5.665786693  | 5.661687951  |
| 440894 | 4.288787513  | 0.2731265 | 2.280956994  | -0.352108471 | -0.352108471 | -0.352108471 |
| 440896 | 5.835482903  | 7.4759394 | 6.655711164  | 3.248686021  | 1.14221151   | 5.355160532  |
| 440900 | -0.352108471 | -0.352108 | -0.352108471 | 0.95025487   | 2.252618212  | -0.352108471 |
| 440905 | 7.049402551  | 1.6162358 | 4.332819167  | -0.352108471 | -0.352108471 | -0.352108471 |
| 440926 | 4.780455428  | 4.4649182 | 4.622686795  | -0.352108471 | -0.352108471 | -0.352108471 |
| 440934 | -0.352108471 | -0.352108 | -0.352108471 | 2.076022254  | 2.100935855  | 2.051108653  |
| 440952 | -0.352108471 | -0.352108 | -0.352108471 | 3.866119728  | 3.919505936  | 3.972892143  |
| 440970 | 7.079845576  | 5.5738939 | 4.067942198  | 2.95889416   | 2.978133346  | 2.968513753  |
| 441072 | 8.299524492  | 8.3501449 | 8.248904043  | 6.130436808  | 6.515031054  | 5.745842563  |
| 441081 | 6.407087129  | 4.8473688 | 3.28765039   | 4.54270355   | 4.559699198  | 4.576694846  |
| 441087 | 6.275785213  | 7.2865519 | 5.26501854   | 6.097037437  | 5.597636691  | 6.596438183  |
| 441089 | -0.352108471 | -0.352108 | -0.352108471 | 5.183235465  | 5.605609608  | 4.760861323  |
| 441151 | 5.92941891   | 4.5770627 | 5.253240792  | -0.352108471 | -0.352108471 | -0.352108471 |
| 441178 | 4.792303669  | 6.4883157 | 3.096291623  | -0.352108471 | -0.352108471 | -0.352108471 |
| 441208 | -0.352108471 | -0.352108 | -0.352108471 | 6.29936863   | 5.760537073  | 5.221705516  |
| 441234 | 5.980334028  | 4.7321481 | 7.228519914  | 1.954444309  | 2.100935855  | 1.807952763  |
| 441242 | 6.853636264  | 5.3075412 | 8.399731302  | -0.352108471 | -0.352108471 | -0.352108471 |
| 441250 | -0.352108471 | -0.352108 | -0.352108471 | 5.821410838  | 5.825167992  | 5.817653684  |
| 441272 | -0.352108471 | -0.352108 | -0.352108471 | 2.747264095  | 0.932208597  | 4.562319593  |
| 441317 | 3.322915003  | 2.7402102 | 2.157505462  | -0.352108471 | -0.352108471 | -0.352108471 |
| 441327 | 2.960303223  | 3.8349844 | 3.397643806  | 7.560644097  | 2.543342009  | 5.051993053  |
| 441376 | 8.055751488  | 3.1064917 | 5.581121573  | 1.14221151   | 1.14221151   | 1.14221151   |
| 441425 | -0.352108471 | -0.352108 | -0.352108471 | 7.646869435  | 5.859617369  | 4.072365303  |
| 441457 | -0.352108471 | -0.352108 | -0.352108471 | 4.138026527  | 8.43308239   | 6.285554459  |
| 441478 | -0.352108471 | -0.352108 | -0.352108471 | 6.396868383  | 7.499096019  | 5.294640746  |
| 441518 | -0.352108471 | -0.352108 | -0.352108471 | 6.3785581    | 6.957743639  | 6.668150869  |
| 441531 | 5.724668212  | 5.5293114 | 5.920025058  | -0.352108471 | -0.352108471 | -0.352108471 |

|        |              |           |              |              |              |              |
|--------|--------------|-----------|--------------|--------------|--------------|--------------|
| 441549 | -0.352108471 | -0.352108 | -0.352108471 | 0.897715333  | 2.147539136  | -0.352108471 |
| 441666 | 1.946552907  | 1.2795148 | 2.613591055  | 5.225663259  | 8.446764378  | 6.836213819  |
| 441728 | 5.745394463  | 5.7155573 | 5.775231583  | -0.352108471 | -0.352108471 | -0.352108471 |
| 441733 | 8.854223243  | 8.5765228 | 8.715372997  | 10.39091511  | 5.888594706  | 8.139754909  |
| 441869 | 4.401382469  | 7.6351311 | 6.018256787  | -0.352108471 | -0.352108471 | -0.352108471 |
| 441925 | -0.352108471 | -0.352108 | -0.352108471 | 5.284974356  | 5.315258837  | 5.254689875  |
| 441956 | 2.566510924  | 7.0180964 | 4.792303669  | 1.223721097  | 1.14221151   | 1.305230684  |
| 442075 | 7.737175083  | 5.3554557 | 2.973736247  | 5.696259122  | 5.463827095  | 5.928691148  |
| 442132 | 4.692989119  | 4.7541814 | 4.631796822  | 5.27319164   | 5.191222747  | 5.355160532  |
| 442245 | -0.352108471 | -0.352108 | -0.352108471 | 2.313941724  | -0.352108471 | 4.979991919  |
| 442421 | 6.967173867  | 6.2604587 | 5.553743587  | 5.543764327  | 7.027226205  | 6.285495266  |
| 442578 | 1.392109249  | 3.136327  | -0.352108471 | 2.710182349  | 0.440372779  | 4.979991919  |
| 442582 | 4.758495381  | 4.6735474 | 4.843443409  | 0.872801732  | 1.305230684  | 0.440372779  |
| 445372 | 2.73125229   | 2.5156976 | 2.300142884  | -0.352108471 | -0.352108471 | -0.352108471 |
| 492311 | -0.352108471 | -0.352108 | -0.352108471 | 3.245625856  | 2.742114909  | 3.749136803  |
| 493812 | 7.590434087  | 9.2564113 | 5.924456828  | 6.650923964  | 7.381083215  | 8.111242466  |
| 493829 | 5.947877441  | 4.4654144 | 2.982951266  | 0.624614178  | 0.440372779  | 0.808855576  |
| 493856 | -0.352108471 | -0.352108 | -0.352108471 | 6.479260377  | 6.497336045  | 6.461184708  |
| 493869 | 7.599139544  | 7.763401  | 7.434878062  | 6.698753019  | 6.821025802  | 6.576480236  |
| 493901 | -0.352108471 | -0.352108 | -0.352108471 | 6.311104816  | 5.821410838  | 5.33171686   |
| 494115 | -0.352108471 | -0.352108 | -0.352108471 | -0.477659345 | 2.146123334  | 4.769906013  |
| 494551 | -0.352108471 | -0.352108 | -0.352108471 | 7.669671459  | 6.076418555  | 6.873045007  |
| 497048 | 2.419557138  | 1.7486918 | 3.090422524  | -0.352108471 | -0.352108471 | -0.352108471 |
| 497259 | 2.783958294  | 2.7854929 | 2.7824237    | 5.980334028  | 6.481737176  | 5.47893088   |
| 497661 | -0.352108471 | -0.352108 | -0.352108471 | 5.430898714  | 6.984596062  | 3.877201366  |
| 503519 | -0.352108471 | -0.352108 | -0.352108471 | 6.204656258  | 6.215464554  | 6.193847962  |
| 503569 | -0.352108471 | -0.352108 | -0.352108471 | 5.512443055  | 2.845356836  | 4.178899946  |
| 503582 | 8.222591862  | 6.9129332 | 7.567762534  | 6.468204264  | 5.503230866  | 5.985717565  |
| 503693 | 7.443574605  | 8.6633136 | 6.223835606  | 5.959771619  | 3.181248298  | 8.73829494   |
| 503835 | 6.705287512  | 6.7206966 | 6.689878453  | 6.753165957  | 6.515031054  | 6.991300859  |
| 541468 | 5.958359385  | 5.9583594 | 5.958359385  | 0.044132154  | 0.440372779  | -0.352108471 |
| 541471 | 0.964314959  | 4.3368764 | 2.65059567   | -0.352108471 | -0.352108471 | -0.352108471 |
| 548644 | 5.185586761  | 0.8561052 | 9.515068282  | 0.044132154  | -0.352108471 | 0.440372779  |
| 550112 | 4.189015174  | 3.8056644 | 3.422313532  | 4.435867475  | 2.264739913  | 3.350303694  |
| 552889 | -0.352108471 | -0.352108 | -0.352108471 | 7.156991566  | 6.541009048  | 5.925026529  |
| 553103 | 5.354685649  | 6.1144923 | 4.594878997  | -0.352108471 | -0.352108471 | -0.352108471 |
| 554203 | 7.408889715  | 5.885114  | 8.9326654    | 3.992127367  | 9.438720113  | 6.71542374   |
| 554236 | -0.352108471 | -0.352108 | -0.352108471 | 4.187631723  | 4.726140676  | 4.456886199  |
| 574406 | 5.737776816  | 4.9355089 | 6.540044767  | 4.675488217  | 2.330562372  | 3.503025295  |
| 574414 | -0.352108471 | -0.352108 | -0.352108471 | -1.26097585  | 4.217370563  | 1.478197356  |
| 595135 | 8.065643396  | 7.5606176 | 7.055591778  | 3.746501554  | 9.465601696  | 6.606051625  |
| 606495 | -0.352108471 | -0.352108 | -0.352108471 | 2.169424975  | 2.191310813  | 2.147539136  |
| 619189 | -0.352108471 | -0.352108 | -0.352108471 | 1.33427356   | 2.233123905  | 1.783698732  |
| 619190 | 7.02496035   | 7.7173979 | 8.409835477  | 8.625399705  | 6.621760009  | 7.623579857  |
| 619208 | 1.383520155  | -0.352108 | 3.119148782  | 1.400698343  | -0.352108471 | 3.153505157  |
| 619434 | -0.352108471 | -0.352108 | -0.352108471 | 4.178899946  | 3.217705361  | 5.14009453   |
| 641364 | 7.518191577  | 6.199679  | 4.881166475  | 3.064586224  | 2.948100703  | 3.181071745  |



|        |              |           |              |              |              |              |
|--------|--------------|-----------|--------------|--------------|--------------|--------------|
| 641455 | 4.977484687  | 4.9347306 | 5.020238824  | 0.762376451  | -0.352108471 | 1.876861374  |
| 641467 | 4.909068675  | 3.8188382 | 4.363953422  | 1.824963332  | 2.376908379  | 2.100935855  |
| 641515 | 4.783083047  | 9.3999115 | 7.091497261  | 0.440372779  | 0.440372779  | 0.440372779  |
| 641638 | 3.850179204  | 5.9002924 | 7.950405556  | -0.352108471 | -0.352108471 | -0.352108471 |
| 641737 | 5.762940099  | 6.2575232 | 6.752106345  | 0.189461371  | 3.890964789  | 7.592468206  |
| 641977 | 6.050658323  | 8.7601081 | 3.341208537  | 4.731342239  | 5.661419446  | 3.801265032  |
| 642236 | 5.965476118  | 5.2083363 | 5.586906204  | 3.033522536  | 3.027193952  | 3.03985112   |
| 642273 | -0.352108471 | -0.352108 | -0.352108471 | 5.758337747  | 3.561777633  | 4.66005769   |
| 642280 | -0.352108471 | -0.352108 | -0.352108471 | 3.373910559  | 5.605609608  | 1.14221151   |
| 642366 | -0.352108471 | -0.352108 | -0.352108471 | 5.716728623  | 2.43016825   | -0.856392123 |
| 642426 | -0.352108471 | -0.352108 | -0.352108471 | 4.617382386  | 1.958013259  | 7.276751513  |
| 642441 | -0.352108471 | -0.352108 | -0.352108471 | 1.438512382  | 2.245600013  | 3.052687645  |
| 642587 | -0.352108471 | -0.352108 | -0.352108471 | 2.064739793  | 0.339265573  | 3.790214012  |
| 642633 | 5.409152593  | 8.2692003 | 6.839176453  | 7.07796731   | 6.641725768  | 6.205484227  |
| 642648 | -0.352108471 | -0.352108 | -0.352108471 | 6.411416545  | 5.412561087  | 4.41370563   |
| 642757 | 5.146252583  | 4.9013721 | 5.023812365  | 1.043426334  | 0.440372779  | 1.646479888  |
| 642826 | 7.591987731  | 7.2999875 | 7.007987186  | 1.124162771  | 0.440372779  | 1.807952763  |
| 642852 | 6.257046343  | 6.8013513 | 5.712741385  | -0.352108471 | -0.352108471 | -0.352108471 |
| 642934 | 8.223525854  | 6.3495694 | 4.475612938  | 1.889059667  | 0.608284395  | 3.16983494   |
| 642943 | 6.369253574  | 5.0079917 | 5.688622647  | 4.842884858  | 3.567505139  | 6.118264577  |
| 642968 | -0.352108471 | -0.352108 | -0.352108471 | 5.663737322  | 6.000546358  | 5.326928286  |
| 643008 | 4.086371885  | 3.9195059 | 3.752639986  | 3.235271764  | 6.65015065   | -0.179607123 |
| 643155 | -0.352108471 | -0.352108 | -0.352108471 | 6.77374078   | 4.822028375  | 8.725453184  |
| 643224 | 5.832003073  | 6.27194   | 6.051971547  | -0.352108471 | -0.352108471 | -0.352108471 |
| 643314 | 7.32386522   | 7.352529  | 7.29520141   | 5.514960729  | 5.775231583  | 5.254689875  |
| 643355 | 7.17777694   | 7.472869  | 6.882684902  | -0.352108471 | -0.352108471 | -0.352108471 |
| 643382 | -0.352108471 | -0.352108 | -0.352108471 | 4.178899946  | 5.938081493  | 2.419718398  |
| 643387 | 8.398709786  | 7.1960989 | 5.993487954  | 9.960173286  | 0.286677576  | 5.123425431  |
| 643401 | 4.940612622  | 4.4826926 | 5.398532684  | 1.179289842  | 0.808855576  | 1.549724107  |
| 643406 | 11.95044425  | 11.880564 | 11.91550423  | 10.68598581  | 12.50763286  | 8.864338755  |
| 643432 | 7.584050702  | 8.4156218 | 9.247192946  | 6.5504786    | 9.225232224  | 7.887855412  |
| 643623 | 6.722637499  | 6.9300962 | 7.137554879  | 0.047280654  | 3.708097346  | 7.368914038  |
| 643677 | 6.394354872  | 6.2125362 | 6.030717546  | -0.352108471 | -0.352108471 | -0.352108471 |
| 643714 | -0.352108471 | -0.352108 | -0.352108471 | 6.279247891  | 6.052493321  | 6.165870606  |
| 643763 | 8.223995653  | 8.3885462 | 8.553096752  | 6.747005247  | 6.841838197  | 6.794421722  |
| 643770 | 5.577957687  | 5.2286715 | 5.927243842  | 2.879532747  | 1.646479888  | 4.112585606  |
| 643827 | -0.352108471 | -0.352108 | -0.352108471 | 1.880238567  | -0.352108471 | 4.112585606  |
| 643836 | -0.352108471 | -0.352108 | -0.352108471 | 4.860625611  | 6.463674915  | 8.066724219  |
| 643837 | 6.573968999  | 5.8635039 | 7.284434123  | -0.352108471 | -0.352108471 | -0.352108471 |
| 643904 | 8.563200932  | 7.3679106 | 6.172620288  | 5.333243483  | 7.225269909  | 3.441217057  |
| 643962 | 3.662109543  | 3.8056644 | 3.949219163  | 7.447036241  | 5.816656262  | 6.631846251  |
| 643988 | -0.352108471 | -0.352108 | -0.352108471 | 1.873849414  | 2.294368503  | 1.453330325  |
| 644050 | 5.852937462  | 6.7349538 | 4.970921153  | -0.352108471 | -0.352108471 | -0.352108471 |
| 644128 | 8.320541927  | 8.1459218 | 8.495162014  | 5.714752974  | 7.209435678  | 8.704118382  |
| 644150 | 1.553627006  | 1.7836987 | 2.013770458  | 1.783698732  | 3.919505936  | -0.352108471 |
| 644215 | -0.352108471 | -0.352108 | -0.352108471 | 1.970890817  | 2.801544164  | 2.38621749   |
| 644285 | 4.098488742  | 5.980334  | 7.862179314  | 0.872801732  | 0.440372779  | 1.305230684  |

|        |              |           |              |              |              |              |
|--------|--------------|-----------|--------------|--------------|--------------|--------------|
| 644316 | 5.200714372  | 5.973098  | 5.586906204  | -0.352108471 | -0.352108471 | -0.352108471 |
| 644538 | 6.303461245  | 6.3152311 | 6.291691359  | -0.352108471 | -0.352108471 | -0.352108471 |
| 644660 | 6.317340387  | 5.4539948 | 4.590649299  | 6.253169245  | 6.720244285  | 5.786094205  |
| 644669 | 1.383520155  | -0.352108 | 3.119148782  | 0.762376451  | -0.352108471 | 1.876861374  |
| 644762 | -0.352108471 | -0.352108 | -0.352108471 | 3.998406827  | 3.860015046  | 4.136798608  |
| 644903 | -0.352108471 | -0.352108 | -0.352108471 | 3.245625856  | 2.998874658  | 3.492377054  |
| 644919 | 3.3436831    | 7.5495947 | 5.446638914  | 5.36792541   | 3.743939131  | 4.555932271  |
| 644936 | 4.676859199  | 4.0130283 | 3.349197432  | 1.968661759  | 1.997577452  | 1.939746065  |
| 644943 | -0.352108471 | -0.352108 | -0.352108471 | 3.919505936  | 3.919505936  | 3.919505936  |
| 644961 | 8.003293525  | 7.548899  | 7.776096252  | 8.050629261  | 7.563153223  | 7.075677186  |
| 644962 | -0.352108471 | -0.352108 | -0.352108471 | 2.432271576  | 2.024343053  | 1.616414529  |
| 645027 | -0.352108471 | -0.352108 | -0.352108471 | 2.211943219  | 1.525243319  | 2.898643119  |
| 645158 | 2.681724436  | 5.7155573 | -0.352108471 | -0.352108471 | -0.352108471 | -0.352108471 |
| 645177 | -0.352108471 | -0.352108 | -0.352108471 | 0.6663574    | 2.501526031  | 4.336694662  |
| 645212 | -0.352108471 | -0.352108 | -0.352108471 | 5.389163245  | 3.524609154  | 4.456886199  |
| 645367 | 6.666097446  | 8.7243324 | 7.69521493   | 5.169157826  | 8.899649703  | 1.438665948  |
| 645432 | 1.783698732  | -0.352108 | 3.919505936  | 1.270654317  | 0.440372779  | 2.100935855  |
| 645644 | 6.004275218  | 5.873346  | 6.135204448  | 6.649850066  | 6.689878453  | 6.609821679  |
| 645949 | -0.352108471 | -0.352108 | -0.352108471 | 5.531832167  | 6.369156591  | 7.206481014  |
| 645961 | 2.65059567   | 1.7607368 | 3.540454561  | -0.352108471 | -0.352108471 | -0.352108471 |
| 646024 | 6.939871798  | 5.8780598 | 8.001683769  | -0.352108471 | -0.352108471 | -0.352108471 |
| 646029 | -0.352108471 | -0.352108 | -0.352108471 | 1.280952158  | 2.419557138  | 3.558162118  |
| 646074 | 5.754124716  | 5.5882244 | 5.920025058  | 6.822643333  | 6.479332994  | 7.165953671  |
| 646113 | 3.364818568  | 5.7237042 | 4.544261391  | 1.12335747   | 0.808855576  | 1.437859363  |
| 646127 | 4.085401266  | 5.8887701 | 7.692138989  | 1.804300246  | 1.731739118  | 1.876861374  |
| 646214 | 12.24379962  | 12.2438   | 12.24379962  | 10.9215946   | 10.68888548  | 11.15430373  |
| 646300 | 3.794565881  | 5.8531269 | 7.91168792   | 5.911588358  | 5.639650211  | 5.367712064  |
| 646383 | -0.352108471 | -0.352108 | -0.352108471 | 6.832688908  | 4.66005769   | 2.487426471  |
| 646405 | 5.76907542   | 6.6633713 | 7.557667098  | 3.07793304   | 8.610332099  | 5.844132569  |
| 646450 | 6.376119016  | 6.2451149 | 6.310616952  | 7.29372613   | 6.965995246  | 7.621457015  |
| 646471 | 7.486480364  | 7.7121014 | 7.260859358  | 6.022419724  | 6.383151496  | 5.661687951  |
| 646643 | 5.235408508  | 5.5587679 | 5.882127232  | -0.352108471 | -0.352108471 | -0.352108471 |
| 646652 | 5.33908768   | 6.0381576 | 5.688622647  | -0.352108471 | -0.352108471 | -0.352108471 |
| 646719 | 4.992965796  | 5.873346  | 4.112585606  | 3.405984988  | 2.051108653  | 4.760861323  |
| 646762 | 12.39358467  | 7.633207  | 2.872829372  | 1.086055948  | 0.440372779  | 1.731739118  |
| 646982 | 5.51774067   | 4.8545369 | 5.186138762  | 0.727922146  | -0.352108471 | 1.807952763  |
| 647024 | 4.590116187  | 4.9774847 | 5.364853187  | 1.986845002  | 1.968646897  | 1.97774595   |
| 647060 | 5.550549618  | 5.4251658 | 5.675933456  | -0.352108471 | -0.352108471 | -0.352108471 |
| 647087 | -0.352108471 | -0.352108 | -0.352108471 | 6.767351589  | 7.177031742  | 7.586711894  |
| 647135 | 7.862511654  | 7.0699027 | 7.466207166  | 6.000307897  | 6.681116072  | 5.319499721  |
| 647166 | 6.964266675  | 6.0483867 | 6.506326703  | 0.689815323  | 1.731739118  | -0.352108471 |
| 647215 | 2.212057023  | 2.4158264 | 2.313941724  | -0.352108471 | -0.352108471 | -0.352108471 |
| 647979 | 6.777429272  | 5.0894122 | 3.401395132  | 1.500083195  | 0.808855576  | 2.191310813  |
| 648691 | 6.926801914  | 6.9512116 | 6.902392266  | 3.884413197  | 3.337746555  | 4.43107984   |
| 648791 | 5.31909676   | 4.4103073 | 6.227886211  | -0.352108471 | -0.352108471 | -0.352108471 |
| 648987 | 7.412226129  | 7.2037262 | 6.995226235  | 5.925380896  | 6.135204448  | 5.715557343  |
| 649159 | 3.477856611  | 4.4126518 | 3.945254192  | -0.352108471 | -0.352108471 | -0.352108471 |

|        |              |           |              |              |              |              |
|--------|--------------|-----------|--------------|--------------|--------------|--------------|
| 649305 | -0.352108471 | -0.352108 | -0.352108471 | 6.314890366  | 6.179632169  | 6.450148562  |
| 649395 | 5.273919496  | 6.979598  | 6.12675876   | 7.013764918  | 5.018248953  | 6.016006936  |
| 650623 | 3.41407487   | 3.5426396 | 3.285510135  | 5.760537073  | 9.282132741  | 2.238941405  |
| 651746 | 5.635939335  | 6.0375467 | 5.234331935  | -0.352108471 | -0.352108471 | -0.352108471 |
| 652968 | -0.352108471 | -0.352108 | -0.352108471 | 5.958359385  | 7.409377372  | 4.507341397  |
| 653121 | 9.22127001   | 7.1286201 | 11.31391991  | 8.2620304    | 8.39453474   | 8.12952606   |
| 653190 | 6.183964016  | 6.1999612 | 6.167966808  | -0.352108471 | -0.352108471 | -0.352108471 |
| 653238 | 8.603799159  | 7.8453125 | 9.362285792  | 6.260835661  | 8.992467768  | 3.529203555  |
| 653269 | -0.352108471 | -0.352108 | -0.352108471 | 1.307197977  | 2.139844176  | 2.972490374  |
| 653316 | 6.300726405  | 6.6371108 | 6.973495121  | 2.202894548  | 1.916337486  | 1.629780425  |
| 653319 | 5.805829598  | 5.313741  | 6.297918221  | 6.265347842  | 5.437723644  | 7.092972041  |
| 653427 | 5.523239719  | 5.5882244 | 5.458255064  | 6.470258851  | 6.479332994  | 6.461184708  |
| 653483 | 6.201178186  | 6.0367194 | 6.365637004  | 1.05704313   | 1.305230684  | 0.808855576  |
| 653509 | -0.352108471 | -0.352108 | -0.352108471 | 2.609208936  | 3.52433951   | 4.439470085  |
| 653567 | 8.120300038  | 7.9560775 | 8.28452261   | 7.559509372  | 6.997105418  | 8.121913326  |
| 653641 | 6.840874497  | 5.6249562 | 4.409037828  | 0.395051519  | 1.14221151   | -0.352108471 |
| 653784 | 1.600140312  | 3.3630101 | 2.481575183  | 7.8702319    | 5.268086279  | 6.56915909   |
| 654364 | -0.352108471 | -0.352108 | -0.352108471 | 2.076022254  | 2.100935855  | 2.051108653  |
| 654434 | 7.368582523  | 7.168058  | 7.569107051  | 7.078623791  | 6.674249904  | 7.482997679  |
| 654463 | -0.352108471 | -0.352108 | -0.352108471 | 6.183964016  | 8.197762641  | 4.17016539   |
| 654466 | 5.287558971  | 7.7872085 | 6.537383725  | 0.044132154  | -0.352108471 | 0.440372779  |
| 654483 | 6.958557799  | 6.321481  | 6.640019393  | 3.098246231  | 2.677051624  | 3.519440837  |
| 654816 | -0.352108471 | -0.352108 | -0.352108471 | 2.38621749   | 1.90220876   | 2.87022622   |
| 654841 | 1.880238567  | 2.4173215 | 1.343155683  | 1.167362396  | 2.686833264  | -0.352108471 |
| 664618 | 8.620055978  | 6.713186  | 4.806315972  | 8.366063136  | 5.469796697  | 2.573530259  |
| 677763 | 7.621307356  | 3.9464575 | 5.783882438  | -0.352108471 | -0.352108471 | -0.352108471 |
| 678655 | 1.113517241  | 3.9926294 | 2.553073296  | -0.352108471 | -0.352108471 | -0.352108471 |
| 692094 | -0.352108471 | -0.352108 | -0.352108471 | 3.73714403   | 3.919505936  | 3.554782125  |
| 727699 | 6.59435665   | 4.9841517 | 3.373946761  | -0.352108471 | -0.352108471 | -0.352108471 |
| 727758 | 8.301630122  | 9.4556269 | 10.60962369  | 9.10261772   | 7.895923822  | 8.499270771  |
| 727764 | 6.352053864  | 6.3831515 | 6.320956231  | 5.284336357  | 5.421579811  | 5.147092904  |
| 727832 | 7.821892757  | 6.1797049 | 4.537516985  | 4.253536939  | 3.519327359  | 2.785117779  |
| 727857 | 2.481575183  | 5.3152588 | -0.352108471 | -0.352108471 | -0.352108471 | -0.352108471 |
| 727896 | 8.629037055  | 7.5043071 | 8.066672076  | 6.063071306  | 6.667874621  | 5.458267991  |
| 727897 | 5.292263812  | 4.6497476 | 4.007231426  | -0.352108471 | -0.352108471 | -0.352108471 |
| 727910 | 9.665624708  | 8.7889793 | 10.54227015  | 4.453124139  | 11.73600339  | 8.094563763  |
| 727956 | -0.352108471 | -0.352108 | -0.352108471 | 2.588601447  | 3.416494304  | 1.760708591  |
| 727957 | 4.80036144   | 5.5722584 | 5.186309932  | 0.044132154  | -0.352108471 | 0.440372779  |
| 727982 | 6.413598714  | 5.2425006 | 4.071402517  | 2.024343053  | 2.051108653  | 1.997577452  |
| 728099 | 4.608240284  | 4.7313422 | 4.854444195  | 5.483681163  | 8.041028188  | 6.762354676  |
| 728113 | -0.352108471 | -0.352108 | -0.352108471 | 6.220238598  | 6.842694841  | 5.597782356  |
| 728175 | 7.827096397  | 5.3208416 | 6.573968999  | -0.352108471 | -0.352108471 | -0.352108471 |
| 728194 | 5.014378707  | 5.0198942 | 5.017136436  | -0.352108471 | -0.352108471 | -0.352108471 |
| 728215 | -0.352108471 | -0.352108 | -0.352108471 | 5.412561087  | 6.455024394  | 4.370097781  |
| 728239 | -0.352108471 | -0.352108 | -0.352108471 | 5.095423988  | 6.281223384  | 3.909624592  |
| 728276 | 5.829558501  | 5.980334  | 6.131109556  | -0.352108471 | -0.352108471 | -0.352108471 |
| 728294 | 7.991120916  | 7.0194876 | 6.04785437   | 7.903233567  | 5.303341441  | 6.603287504  |

|        |              |           |              |              |              |              |
|--------|--------------|-----------|--------------|--------------|--------------|--------------|
| 728342 | 6.037384919  | 9.6500558 | 7.843720343  | 1.036211897  | 1.14221151   | 0.930212283  |
| 728378 | 5.12275185   | 7.819057  | 2.426446723  | 2.168105043  | 4.688318557  | -0.352108471 |
| 728392 | -0.352108471 | -0.352108 | -0.352108471 | 1.601336827  | -0.352108471 | 3.554782125  |
| 728430 | 6.333168826  | 3.5099261 | 9.156411591  | 1.500083195  | 0.808855576  | 2.191310813  |
| 728448 | 6.982507911  | 7.3002834 | 6.664732455  | 6.512324019  | 6.569647067  | 6.540985543  |
| 728489 | 3.127737875  | 4.7239442 | 1.531531543  | 6.235921161  | 6.275631672  | 6.19621065   |
| 728495 | 5.784726556  | 8.2134179 | 6.999072227  | 7.514458236  | 8.711589433  | 6.31732704   |
| 728498 | 6.199649067  | 4.3699781 | 5.284813592  | -0.352108471 | -0.352108471 | -0.352108471 |
| 728558 | 7.916336852  | 8.5518265 | 7.280847223  | 6.108515041  | 6.411432414  | 6.714349787  |
| 728606 | 4.263981799  | 5.2252056 | 6.186429306  | 4.381407216  | 4.356756032  | 4.406058401  |
| 728609 | -0.352108471 | -0.352108 | -0.352108471 | 6.858057892  | 5.420879354  | 3.983700816  |
| 728613 | 4.867086667  | 2.3933863 | 7.340787043  | 1.345967809  | 1.549724107  | 1.14221151   |
| 728621 | 7.821159777  | 6.7329762 | 7.277067986  | 5.493783215  | 5.529311366  | 5.458255064  |
| 728658 | 6.399093246  | 7.9086489 | 7.153871086  | 5.447926497  | 7.697805394  | 9.947684291  |
| 728661 | 5.685832011  | 4.2674298 | 2.849027643  | 0.044132154  | 0.440372779  | -0.352108471 |
| 728730 | 6.155367366  | 5.626442  | 5.097516645  | 2.176777034  | 2.100935855  | 2.252618212  |
| 728739 | 3.694803897  | 1.6766603 | 2.685732087  | -0.352108471 | -0.352108471 | -0.352108471 |
| 728747 | -0.352108471 | -0.352108 | -0.352108471 | 2.451290702  | 5.254689875  | -0.352108471 |
| 728752 | 5.148678732  | 6.7431483 | 8.337617916  | 7.018254481  | 6.077045201  | 7.959463762  |
| 728755 | 2.62245663   | 2.6703485 | 2.574564776  | 0.624614178  | 0.440372779  | 0.808855576  |
| 728758 | 3.397643806  | 2.5975271 | 4.197760525  | 0.617107247  | 3.188422968  | 1.902765107  |
| 728773 | 8.537285854  | 6.4307504 | 7.484018122  | 7.805112732  | 5.915575618  | 6.860344175  |
| 728780 | 5.866795484  | 6.6189382 | 5.114652817  | -0.352108471 | -0.352108471 | -0.352108471 |
| 728841 | 4.345552728  | 5.8769528 | 7.408352961  | -0.352108471 | -0.352108471 | -0.352108471 |
| 728855 | -0.352108471 | -0.352108 | -0.352108471 | 4.98230645   | 3.428426646  | 1.874546843  |
| 728882 | 3.693385802  | 3.3368967 | 3.515141236  | 4.780236561  | 7.871864475  | 1.688608647  |
| 728927 | 3.9184181    | 3.5356078 | 4.301228371  | 3.340803748  | 6.378330955  | 9.415858162  |
| 728929 | -0.352108471 | -0.352108 | -0.352108471 | 3.185088003  | 3.180115815  | 3.182601909  |
| 728963 | 6.07928876   | 5.5081954 | 4.937101979  | 2.681367444  | 1.807952763  | 3.554782125  |
| 729020 | -0.352108471 | -0.352108 | -0.352108471 | 5.637296679  | 4.915312754  | 6.359280604  |
| 729041 | -0.352108471 | -0.352108 | -0.352108471 | -0.691758944 | 5.100511796  | 2.204376426  |
| 729047 | 2.62245663   | -0.352108 | 5.597021732  | -0.352108471 | -0.352108471 | -0.352108471 |
| 729059 | -0.352108471 | -0.352108 | -0.352108471 | 5.529311366  | 9.305857378  | 1.752765354  |
| 729082 | 5.276999284  | 4.8304259 | 5.723572646  | 6.66228969   | 6.595493818  | 6.729085562  |
| 729083 | 1.383520155  | -0.352108 | 3.119148782  | 7.516141656  | 5.189616664  | 2.863091671  |
| 729156 | 7.063413806  | 7.8807081 | 6.246119475  | -0.352108471 | -0.352108471 | -0.352108471 |
| 729218 | 5.604811639  | 4.5870979 | 3.569384172  | 3.19408489   | 3.254329098  | 3.314573306  |
| 729224 | -0.352108471 | -0.352108 | -0.352108471 | 6.087644454  | 8.896283568  | 3.279005341  |
| 729230 | -0.352108471 | -0.352108 | -0.352108471 | 4.471969047  | 5.923493182  | 7.375017318  |
| 729234 | 7.173216815  | 5.9002924 | 4.627367946  | -0.352108471 | -0.352108471 | -0.352108471 |
| 729288 | 5.147625378  | 5.0309475 | 5.264303258  | 1.90117116   | 0.125768811  | 3.676573508  |
| 729348 | 12.25629413  | 12.628608 | 12.4424511   | 11.56558005  | 11.59854904  | 11.53261106  |
| 729375 | -0.352108471 | -0.352108 | -0.352108471 | 4.502294297  | 4.651904177  | 4.801514057  |
| 729438 | 7.135705742  | 8.3950861 | 7.765395899  | 5.252762275  | 8.656334653  | 6.954548464  |
| 729440 | 2.280956994  | 4.9140225 | -0.352108471 | -0.352108471 | -0.352108471 | -0.352108471 |
| 729522 | 4.152855543  | 4.9470072 | 5.741158835  | -0.352108471 | -0.352108471 | -0.352108471 |
| 729582 | 5.837315695  | 5.6614885 | 5.749402114  | 4.941761661  | 5.628187051  | 5.284974356  |

|           |              |           |              |              |              |              |
|-----------|--------------|-----------|--------------|--------------|--------------|--------------|
| 729603    | 7.305585019  | 8.9227724 | 10.53995979  | 7.35827986   | 5.723484561  | 8.993075158  |
| 729614    | 2.608409114  | 4.4343147 | 6.260220223  | 1.77365078   | 1.997577452  | 1.549724107  |
| 729627    | 5.546367231  | 6.0384535 | 5.054280952  | 1.748270748  | 2.191310813  | 1.305230684  |
| 729648    | -0.352108471 | -0.352108 | -0.352108471 | 6.204521859  | 5.08184628   | 7.327197437  |
| 729652    | 5.924443035  | 5.4766133 | 6.372272754  | 1.622906063  | 1.807952763  | 1.437859363  |
| 729668    | 4.736897423  | 4.3359073 | 3.934917266  | 0.044132154  | -0.352108471 | 0.440372779  |
| 729683    | 4.904231184  | 8.0885771 | 1.719885262  | 6.689738252  | 5.673206489  | 4.656674726  |
| 729723    | 6.834544042  | 7.8295873 | 8.824630522  | 6.328565253  | 5.527444067  | 5.92800466   |
| 729732    | 8.196253796  | 6.4606394 | 7.328446606  | 7.631560883  | 8.237096988  | 7.026024778  |
| 729815    | 2.90532861   | 2.5232121 | 2.141095603  | -0.352108471 | -0.352108471 | -0.352108471 |
| 729830    | 5.828334333  | 5.8529375 | 5.87754059   | 6.226065905  | 5.393523004  | 4.560980104  |
| 729920    | 7.16679269   | 6.9981067 | 7.335478698  | 3.657927132  | 5.124543452  | 2.191310813  |
| 729950    | -0.352108471 | -0.352108 | -0.352108471 | 3.039219967  | 5.052267685  | 7.065315404  |
| 729968    | 5.995073095  | 5.006002  | 4.01693083   | 0.228373553  | -0.352108471 | 0.808855576  |
| 729975    | 7.785138791  | 7.9017577 | 7.668519914  | 6.782044062  | 8.442593877  | 5.121494247  |
| 729987    | 4.933009816  | 5.5621596 | 6.191309417  | 1.383520155  | -0.412176871 | 3.179217182  |
| 729991    | -0.352108471 | -0.352108 | -0.352108471 | 6.306122915  | 6.988397092  | 5.623848739  |
| 729993    | 4.281398903  | 3.8774325 | 4.079415695  | 1.835742592  | 1.731739118  | 1.939746065  |
| 730051    | 8.347114316  | 5.7878371 | 10.90639153  | 6.308332738  | 5.245307588  | 7.371357888  |
| 730101    | -0.352108471 | -0.352108 | -0.352108471 | 1.179995407  | 2.686833264  | 4.19367112   |
| 730102    | 6.831289207  | 6.1259322 | 7.536646239  | 0.044132154  | 0.440372779  | -0.352108471 |
| 730152    | -0.352108471 | -0.352108 | -0.352108471 | 5.624186603  | 5.896887543  | 5.760537073  |
| 730227    | 4.819198953  | 4.9110773 | 4.865138141  | 1.371545024  | 1.067877447  | 1.6752126    |
| 730249    | 5.852937462  | 5.873346  | 5.832528937  | -0.352108471 | -0.352108471 | -0.352108471 |
| 730338    | 4.947007189  | 5.0447512 | 4.849263165  | 3.420977679  | 2.986363532  | 3.203670606  |
| 731424    | 6.104798308  | 6.1079622 | 6.101634422  | 5.445736258  | 5.825167992  | 5.066304524  |
| 731631    | 2.760618758  | 5.873346  | -0.352108471 | 2.141842139  | 2.232575625  | 2.051108653  |
| 731789    | 2.681724436  | 5.7155573 | -0.352108471 | -0.352108471 | -0.352108471 | -0.352108471 |
| 752014    | 6.020381091  | 6.0384535 | 6.002308672  | -0.352108471 | -0.352108471 | -0.352108471 |
| 767846    | 7.217317616  | 7.2305473 | 7.204087928  | -0.352108471 | -0.352108471 | -0.352108471 |
| 768096    | 7.378986177  | 7.0205456 | 6.662104972  | 8.828542622  | 6.601861868  | 4.375181115  |
| 768097    | 5.152247113  | 5.1799508 | 5.124543452  | -0.352108471 | -0.352108471 | -0.352108471 |
| 780776    | 1.66985715   | -0.352108 | 3.69182277   | 1.478197356  | 0.808855576  | 2.147539136  |
| 780851    | 4.51958692   | 5.7397228 | 3.299451026  | -0.352108471 | -0.352108471 | -0.352108471 |
| 790952    | 9.822866008  | 10.797959 | 11.77305288  | 10.87546361  | 7.605173409  | 9.240318508  |
| 790955    | 3.913265813  | 4.8586077 | 4.385936778  | 1.154163373  | 9.054745048  | 5.104454211  |
| 100009667 | 4.862123794  | 6.3881977 | 5.625160771  | -0.352108471 | -0.352108471 | -0.352108471 |
| 100009676 | 2.313941724  | 2.4116557 | 2.216227741  | 5.776014922  | 6.996106807  | 6.386060865  |
| 100049587 | 5.460736426  | 3.5386593 | 4.49969785   | 0.044132154  | -0.352108471 | 0.440372779  |
| 100093630 | -0.352108471 | -0.352108 | -0.352108471 | 6.442417784  | 4.885056859  | 5.663737322  |
| 100101267 | -0.352108471 | -0.352108 | -0.352108471 | 9.99566555   | 6.434644758  | 2.873623966  |
| 100101467 | -0.352108471 | -0.352108 | -0.352108471 | 7.162930734  | 6.345275458  | 5.527620181  |
| 100113386 | 6.76370968   | 10.481546 | 8.622627603  | 6.231464489  | 7.139414226  | 6.685439357  |
| 100113407 | 6.551924034  | 4.5468043 | 8.557043757  | 4.524559503  | 6.318354747  | 5.421457125  |
| 100126784 | -0.352108471 | -0.352108 | -0.352108471 | 3.257984007  | 6.597374422  | 4.927679215  |
| 100127888 | 7.193793348  | 4.5120816 | 5.852937462  | -0.352108471 | -0.352108471 | -0.352108471 |
| 100127955 | 6.042866175  | 5.0522677 | 4.061669196  | -0.352108471 | -0.352108471 | -0.352108471 |

|           |              |           |              |              |              |              |
|-----------|--------------|-----------|--------------|--------------|--------------|--------------|
| 100127967 | 7.010746409  | 5.3849191 | 3.759091886  | 1.76984594   | 2.022386357  | 1.517305524  |
| 100128006 | 7.734690198  | 7.7746004 | 7.694779984  | 3.523498977  | 4.109806718  | 2.937191237  |
| 100128025 | 4.470233423  | 3.8926749 | 4.181454156  | 0.689815323  | 1.731739118  | -0.352108471 |
| 100128071 | -0.352108471 | -0.352108 | -0.352108471 | 4.559699198  | 7.402047393  | 1.717351003  |
| 100128126 | 6.114621473  | 9.7121152 | 2.517127752  | 5.562684146  | 5.69655082   | 5.830417494  |
| 100128127 | -0.352108471 | -0.352108 | -0.352108471 | 3.523498977  | 4.702326924  | 2.34467103   |
| 100128233 | 6.915905977  | 6.0042752 | 5.092644458  | 3.622795883  | 5.054280952  | 2.191310813  |
| 100128252 | 2.84317252   | 6.0384535 | -0.352108471 | -0.352108471 | -0.352108471 | -0.352108471 |
| 100128285 | 7.480076024  | 6.991795  | 6.503514071  | -0.352108471 | -0.352108471 | -0.352108471 |
| 100128288 | 6.814666936  | 8.0506494 | 5.578684505  | 5.114526679  | 6.720022075  | 8.32551747   |
| 100128292 | 5.184151491  | 2.5588929 | 7.809410083  | 1.190059422  | 1.939746065  | 0.440372779  |
| 100128338 | 5.880618662  | 6.7193663 | 7.558114024  | 5.075545493  | 3.96138536   | 2.847225226  |
| 100128340 | 6.861057494  | 7.4239083 | 6.298206641  | -0.352108471 | -0.352108471 | -0.352108471 |
| 100128398 | 7.126229097  | 7.069396  | 7.09781253   | 7.015842684  | 6.697558522  | 6.856700603  |
| 100128494 | 6.593987376  | 6.6737661 | 6.633876737  | 8.580655142  | 4.058374142  | 6.319514642  |
| 100128531 | 6.224862874  | 6.9423464 | 5.507379381  | 5.875147482  | 5.702486887  | 6.047808077  |
| 100128640 | 2.976771008  | 5.6290742 | 4.302922615  | 1.769397609  | 2.186754596  | 1.352040622  |
| 100128682 | 3.29075662   | 4.5572447 | 5.823732761  | 3.725242432  | 3.669380942  | 3.613519451  |
| 100128731 | 10.31959442  | 6.2849209 | 8.302257681  | 8.332318834  | 7.695296622  | 8.013807728  |
| 100128788 | 4.587097906  | 3.1543068 | 6.019888963  | 2.825622527  | 4.13460375   | 1.516641303  |
| 100128881 | -0.352108471 | -0.352108 | -0.352108471 | 4.020564006  | 3.119148782  | 2.217733557  |
| 100128946 | -0.352108471 | -0.352108 | -0.352108471 | 5.845486367  | 5.107185874  | 5.47633612   |
| 100128966 | 5.90029238   | 6.7755365 | 5.025048275  | -0.352108471 | -0.352108471 | -0.352108471 |
| 100129027 | -0.352108471 | -0.352108 | -0.352108471 | 2.19005738   | 2.232575625  | 2.147539136  |
| 100129138 | 5.483227165  | 5.0272459 | 5.939208422  | 1.77365078   | 1.997577452  | 1.549724107  |
| 100129195 | 3.55296241   | 3.4856923 | 3.519327359  | 5.441760481  | 4.907571138  | 4.373381794  |
| 100129223 | -0.352108471 | -0.352108 | -0.352108471 | 5.397423705  | 5.596916991  | 5.796410278  |
| 100129269 | 7.324111644  | 8.9656576 | 8.144884631  | 5.320380917  | 7.30293721   | 6.311659063  |
| 100129361 | -0.352108471 | -0.352108 | -0.352108471 | 6.532441983  | 9.065224186  | 3.999659781  |
| 100129387 | 4.152721357  | 4.7816768 | 3.523765884  | 0.215589614  | 2.101644539  | 1.158617076  |
| 100129396 | -0.352108471 | -0.352108 | -0.352108471 | 5.48038507   | 5.605609608  | 5.355160532  |
| 100129434 | 13.71126191  | 12.287112 | 12.99918694  | 12.09160162  | 12.05978117  | 12.12342206  |
| 100129461 | 3.897916785  | 5.3211461 | 6.744375431  | -0.352108471 | -0.352108471 | -0.352108471 |
| 100129482 | 3.434063996  | 5.5868821 | 7.739700271  | 3.518475388  | 6.056053999  | 8.59363261   |
| 100129503 | 4.058159444  | 3.136327  | 4.979991919  | 1.245740716  | 0.440372779  | 2.051108653  |
| 100129520 | 6.939871798  | 6.9529417 | 6.926801914  | -0.352108471 | -0.352108471 | -0.352108471 |
| 100129583 | 2.481575183  | 2.4530973 | 2.510053061  | -0.352108471 | -0.352108471 | -0.352108471 |
| 100129620 | 5.841308752  | 5.5587679 | 5.276226989  | 0.044132154  | -0.352108471 | 0.440372779  |
| 100129662 | 6.991795048  | 6.9981067 | 6.985483415  | 6.345275458  | 6.355161685  | 6.33538923   |
| 100129697 | -0.352108471 | -0.352108 | -0.352108471 | 0.919601171  | -0.352108471 | 2.191310813  |
| 100129716 | 7.844935289  | 8.1767271 | 8.010831185  | 4.560250079  | 7.120543035  | 9.680835992  |
| 100129935 | 5.459607292  | 7.398238  | 6.428922631  | 0.791292145  | 1.14221151   | 0.440372779  |
| 100130075 | -0.352108471 | -0.352108 | -0.352108471 | 5.587357467  | 5.734165027  | 5.440549907  |
| 100130093 | -0.352108471 | -0.352108 | -0.352108471 | 3.384482817  | 4.624785411  | 2.144180224  |
| 100130207 | -0.352108471 | -0.352108 | -0.352108471 | 3.585121301  | 5.13628526   | 2.033957342  |
| 100130231 | 4.871233248  | 4.617923  | 5.124543452  | -0.352108471 | -0.352108471 | -0.352108471 |
| 100130238 | -0.352108471 | -0.352108 | -0.352108471 | 2.738224417  | 1.600625532  | 2.169424975  |



|           |              |           |              |              |              |              |
|-----------|--------------|-----------|--------------|--------------|--------------|--------------|
| 100130285 | 6.263611604  | 5.1235654 | 7.40365782   | 1.731739118  | 1.731739118  | 1.731739118  |
| 100130451 | 10.05731557  | 9.5447948 | 9.80105521   | 7.386283023  | 8.96894828   | 5.803617767  |
| 100130520 | 7.460800975  | 3.902655  | 5.681727979  | 0.874413692  | 2.100935855  | -0.352108471 |
| 100130557 | 7.146175474  | 6.1995978 | 8.092753187  | 3.892888144  | 6.03613661   | 8.179385076  |
| 100130581 | 8.750782632  | 7.7714348 | 6.792086899  | 3.251947075  | 4.283924671  | 5.315902268  |
| 100130698 | 4.393370554  | 0.712776  | 2.553073296  | -0.352108471 | -0.352108471 | -0.352108471 |
| 100130776 | -0.352108471 | -0.352108 | -0.352108471 | 6.554628999  | 6.590717732  | 6.572673365  |
| 100130872 | 5.190074303  | 5.054281  | 5.325867653  | 1.640731613  | 1.549724107  | 1.731739118  |
| 100130890 | 7.107828715  | 6.3623856 | 7.853271846  | 6.132257081  | 5.32075504   | 4.509253     |
| 100130899 | 5.644336636  | 8.320514  | 2.968159301  | 1.327000025  | 1.72638491   | 2.125769796  |
| 100130954 | 6.536804188  | 6.4186985 | 6.65490985   | 5.928916513  | 6.74495349   | 7.560990466  |
| 100131017 | 8.889567996  | 6.0628006 | 7.476184293  | 1.371545024  | 1.437859363  | 1.305230684  |
| 100131067 | 5.948609857  | 6.3414989 | 6.734388006  | 6.55718572   | 5.56182082   | 7.55255062   |
| 100131089 | 6.726175503  | 6.8469245 | 6.967673497  | 1.117721484  | 1.305230684  | 0.930212283  |
| 100131096 | 5.277347693  | 4.7935692 | 5.035458467  | 2.878545696  | 2.507535085  | 2.693040391  |
| 100131107 | -0.352108471 | -0.352108 | -0.352108471 | 4.662527092  | 5.859617369  | 7.056707646  |
| 100131205 | 5.347774631  | 5.7155573 | 4.979991919  | 0.542875446  | -0.352108471 | 1.437859363  |
| 100131211 | -0.352108471 | -0.352108 | -0.352108471 | 5.869665514  | 5.893442277  | 5.845888751  |
| 100131257 | 12.68803241  | 14.378806 | 10.9972591   | 13.50973311  | 11.56558005  | 9.621426987  |
| 100131262 | 1.66985715   | -0.352108 | 3.69182277   | 3.420123827  | 4.456886199  | 5.493648572  |
| 100131315 | -0.352108471 | -0.352108 | -0.352108471 | 5.080554094  | 5.529311366  | 4.631796822  |
| 100131320 | -0.352108471 | -0.352108 | -0.352108471 | 5.095423988  | 5.124543452  | 5.066304524  |
| 100131347 | 3.75254278   | 4.3859368 | 3.119148782  | 1.74784442   | 2.686833264  | 0.808855576  |
| 100131496 | 6.535909516  | 6.7454347 | 6.326384314  | 3.668632064  | 6.014452276  | 1.322811852  |
| 100131564 | 8.43039751   | 7.4288242 | 7.92961084   | 6.995794281  | 7.152887698  | 7.309981114  |
| 100131691 | 5.149020242  | 6.3964328 | 3.901607702  | 3.533307748  | 0.534864438  | 2.034086093  |
| 100131801 | -0.352108471 | -0.352108 | -0.352108471 | 6.502035182  | 5.048101249  | 5.775068216  |
| 100131897 | -0.352108471 | -0.352108 | -0.352108471 | 2.191584826  | 2.313651598  | 2.252618212  |
| 100132057 | 6.573968999  | 6.9723174 | 6.175620628  | -0.352108471 | -0.352108471 | -0.352108471 |
| 100132077 | 5.256484155  | 6.9128905 | 8.569296897  | 5.504186002  | 5.315258837  | 5.693113166  |
| 100132101 | 4.513304033  | 7.2765395 | 1.750068586  | 3.857445023  | 4.578801146  | 5.300157269  |
| 100132154 | 8.881348136  | 7.9746271 | 8.427987642  | 7.624230206  | 7.505494249  | 7.386758292  |
| 100132169 | 4.245214285  | 1.0745472 | 7.415881363  | 5.105431891  | 5.504902093  | 5.904372294  |
| 100132249 | 8.321094611  | 8.0744353 | 8.567753944  | 5.506611151  | 6.903819455  | 8.301027759  |
| 100132295 | 5.749402114  | 5.7752316 | 5.723572646  | -0.352108471 | -0.352108471 | -0.352108471 |
| 100132354 | 7.909679438  | 5.9611669 | 4.012654293  | -0.352108471 | -0.352108471 | -0.352108471 |
| 100132526 | 5.860022834  | 5.8615274 | 5.858518226  | 6.051012296  | 4.209125924  | 7.892898669  |
| 100132594 | 4.803618005  | 2.735462  | 6.871774048  | -0.352108471 | -0.352108471 | -0.352108471 |
| 100132619 | 3.862940367  | 2.3925354 | 3.127737875  | 4.041902295  | 4.80208491   | 5.562267525  |
| 100132677 | 7.208142848  | 6.1333361 | 5.058529434  | 1.12335747   | 0.808855576  | 1.437859363  |
| 100132774 | 5.712678347  | 6.4453648 | 4.979991919  | 3.90093566   | 5.804293869  | 1.997577452  |
| 100132815 | 6.520799499  | 6.1414231 | 6.900175883  | 4.456886199  | 4.482692559  | 4.43107984   |
| 100132832 | -0.352108471 | -0.352108 | -0.352108471 | 2.121209733  | 2.191310813  | 2.051108653  |
| 100132874 | -0.352108471 | -0.352108 | -0.352108471 | 3.591645958  | 0.650773508  | 2.121209733  |
| 100132911 | 6.331936898  | 7.0611019 | 5.602771915  | 6.540477509  | 6.353906971  | 6.167336433  |
| 100133036 | -0.352108471 | -0.352108 | -0.352108471 | 0.95025487   | -0.352108471 | 2.252618212  |
| 100133121 | 5.195685681  | 5.5202832 | 5.357984451  | 5.178880455  | 4.48140857   | 5.87635234   |

|           |              |           |              |              |              |              |
|-----------|--------------|-----------|--------------|--------------|--------------|--------------|
| 100133331 | 3.931977972  | 4.6173824 | 5.3027868    | -0.352108471 | -0.352108471 | -0.352108471 |
| 100133920 | 6.97258325   | 4.2184161 | 5.595499658  | -0.352108471 | -0.352108471 | -0.352108471 |
| 100133941 | 7.037781708  | 8.1576667 | 5.917896697  | 6.755846282  | 6.813225323  | 6.698467242  |
| 100134040 | -0.352108471 | -0.352108 | -0.352108471 | 1.581393954  | 2.232575625  | 0.930212283  |
| 100134444 | -0.352108471 | -0.352108 | -0.352108471 | 2.168105043  | 4.688318557  | -0.352108471 |
| 100134868 | 5.107302037  | 5.8692224 | 6.63114281   | 0.228373553  | 0.808855576  | -0.352108471 |
| 100142659 | 5.354685649  | 5.3835036 | 5.325867653  | -0.352108471 | -0.352108471 | -0.352108471 |
| 100144595 | 6.697650533  | 6.0584885 | 6.378069496  | 8.175722907  | 5.939256449  | 3.702789991  |
| 100144748 | 6.930096189  | 6.9037827 | 6.956409727  | 6.77688455   | 6.750862801  | 6.802906299  |
| 100147773 | 5.656289537  | 5.7155573 | 5.597021732  | 0.228373553  | -0.352108471 | 0.808855576  |
| 100188917 | -0.352108471 | -0.352108 | -0.352108471 | 4.80208491   | 5.374947902  | 4.229221918  |
| 100188947 | 6.136795257  | 6.3152311 | 5.958359385  | 5.23177507   | 4.688318557  | 5.775231583  |
| 100188953 | 5.91063331   | 5.6532998 | 6.167966808  | 1.437859363  | 1.437859363  | 1.437859363  |
| 100188954 | 6.475834528  | 7.0002884 | 5.951380647  | 1.223721097  | 0.861671934  | 1.58577026   |
| 100190938 | 6.236695219  | 6.0524358 | 6.420954684  | 5.655380401  | 7.482915129  | 6.569147765  |
| 100190940 | 3.183399768  | 6.8286042 | 5.006001962  | 6.251703356  | 4.943908594  | 3.636113833  |
| 100190986 | 6.551531362  | 8.2669293 | 4.836133438  | 6.518776878  | 7.302381905  | 8.085986931  |
| 100191040 | 6.28106638   | 6.1995956 | 6.118124884  | -0.352108471 | -0.352108471 | -0.352108471 |
| 100192420 | 10.10926989  | 6.0299969 | 1.95072392   | 0.791292145  | 0.440372779  | 1.14221151   |
| 100216479 | 4.984393465  | 4.2452143 | 5.723572646  | 1.727216326  | 1.646479888  | 1.807952763  |
| 100233209 | 4.795188378  | 5.0805541 | 5.36591981   | 1.043426334  | 1.646479888  | 0.440372779  |
| 100268168 | 8.107324794  | 6.7648161 | 5.422307458  | 5.509057391  | 5.482709348  | 5.495883369  |
| 100271715 | 5.284974356  | 5.3152588 | 5.254689875  | -0.352108471 | -0.352108471 | -0.352108471 |
| 100271836 | 3.591652     | 2.0145989 | 2.803125457  | -0.352108471 | -0.352108471 | -0.352108471 |
| 100272147 | -0.352108471 | -0.352108 | -0.352108471 | 3.850724089  | 5.958359385  | 8.06599468   |
| 100286844 | 4.758263834  | 4.7359333 | 4.780594366  | 1.223721097  | 1.305230684  | 1.14221151   |
| 100287015 | 6.606671778  | 7.8867459 | 5.326597619  | 2.350520741  | 1.761670631  | 1.172820521  |
| 100287036 | -0.352108471 | -0.352108 | -0.352108471 | 8.042215924  | 6.311659063  | 4.581102202  |
| 100287042 | 4.363953422  | 3.3234906 | 5.404416235  | 7.43611685   | 6.272179388  | 8.600054313  |
| 100287082 | -0.352108471 | -0.352108 | -0.352108471 | 2.911033875  | 5.596916991  | 8.282800107  |
| 100287226 | -0.352108471 | -0.352108 | -0.352108471 | 1.383520155  | 3.119148782  | -0.352108471 |
| 100287270 | 5.546108263  | 4.8304259 | 6.261790604  | 5.284974356  | 5.315258837  | 5.254689875  |
| 100287290 | 6.504249638  | 6.5970178 | 6.550633696  | 6.445401299  | 5.847710919  | 5.25002054   |
| 100287314 | 6.605482243  | 6.2479641 | 5.890445911  | 4.481413792  | 5.868531014  | 7.255648236  |
| 100287387 | 5.217320325  | 6.1476709 | 4.286969732  | 1.405996421  | 3.576708353  | 5.747420285  |
| 100287616 | 2.245600013  | 3.3053943 | 1.185805728  | 6.204656258  | 7.449796053  | 4.959516463  |
| 100287639 | 2.631634217  | 1.4021941 | 2.016914154  | 3.880309919  | 2.439072038  | 0.997834158  |
| 100287722 | 8.81650169   | 7.0871828 | 5.35786397   | 4.772383248  | 6.106446694  | 7.44051014   |
| 100287792 | 8.339229013  | 6.5710539 | 4.802878743  | 5.431542975  | 6.297453798  | 7.16336462   |
| 100287823 | 3.86984729   | 6.9853317 | 5.42758951   | -0.352108471 | -0.352108471 | -0.352108471 |
| 100287846 | 4.908926167  | 6.1368079 | 7.364689543  | 4.09062522   | 2.022080686  | 6.159169754  |
| 100287898 | -0.352108471 | -0.352108 | -0.352108471 | 4.927679215  | 4.954218546  | 4.901139884  |
| 100287932 | 2.15990226   | 1.5108201 | 2.808984446  | 2.53101606   | 3.919505936  | 5.307995811  |
| 100288077 | 4.616975419  | 1.8734952 | 3.245235305  | 5.821410838  | 4.025622598  | 7.617199078  |
| 100288079 | 3.726804584  | 1.7944329 | 2.760618758  | -0.352108471 | -0.352108471 | -0.352108471 |
| 100288142 | 5.852937462  | 4.5710473 | 7.134827656  | -0.352108471 | -0.352108471 | -0.352108471 |
| 100288181 | 5.50819537   | 5.9991789 | 5.017211832  | 2.035970564  | 4.732995071  | 3.384482817  |

|           |              |           |              |              |              |              |
|-----------|--------------|-----------|--------------|--------------|--------------|--------------|
| 100288254 | 6.536514975  | 7.0300312 | 6.042998786  | 6.804723141  | 4.97854774   | 8.630898543  |
| 100288527 | 6.121528769  | 5.178749  | 7.064308531  | -0.352108471 | -0.352108471 | -0.352108471 |
| 100288615 | 6.427319214  | 5.4483354 | 5.937827329  | -0.352108471 | -0.352108471 | -0.352108471 |
| 100288748 | 4.115678136  | 6.231676  | 5.173677083  | 1.14221151   | 1.14221151   | 1.14221151   |
| 100288778 | 1.065336338  | 2.3139417 | 3.56254711   | -0.352108471 | -0.352108471 | -0.352108471 |
| 100288846 | 5.688622647  | 5.7155573 | 5.661687951  | -0.352108471 | -0.352108471 | -0.352108471 |
| 100289019 | 6.709235363  | 6.8088907 | 6.908546041  | 7.712812022  | 6.091591095  | 4.470370168  |
| 100289097 | 3.792256394  | 6.3604577 | 5.07635705   | 1.223721097  | 1.305230684  | 1.14221151   |
| 100289124 | 4.596401634  | 5.289714  | 3.903089269  | -0.049510209 | 4.241874486  | 2.096182139  |
| 100289137 | 6.223836723  | 6.4453648 | 6.002308672  | -0.352108471 | -0.352108471 | -0.352108471 |
| 100289341 | 6.957178318  | 8.0271653 | 5.887191311  | 6.058226619  | 1.488244727  | 3.773235673  |
| 100289580 | 6.268384805  | 6.8018138 | 7.335242742  | -0.352108471 | -0.352108471 | -0.352108471 |
| 100289650 | -0.352108471 | -0.352108 | -0.352108471 | 2.43016825   | -0.352108471 | 5.212444972  |
| 100289678 | 4.890484718  | 5.9092789 | 5.399881815  | 1.70048971   | 1.556591723  | 1.412693737  |
| 100292680 | 4.640942554  | 4.1925858 | 4.416764197  | 1.454895716  | 0.808855576  | 2.100935855  |
| 100294362 | 4.381407216  | 3.9195059 | 4.843308497  | 2.929626001  | 1.939746065  | 3.919505936  |
| 100302401 | 5.401515054  | 5.6310304 | 5.516272736  | 7.361599114  | 7.480110924  | 7.243087303  |
| 100302692 | 4.947007189  | 5.5168937 | 4.377120644  | 3.820309957  | 4.665843474  | 2.97477644   |
| 100302739 | 3.663903369  | 1.8645479 | 2.764225616  | -0.352108471 | -0.352108471 | -0.352108471 |
| 100302740 | 2.201036472  | 3.7787594 | 0.62331358   | -0.352108471 | -0.352108471 | -0.352108471 |
| 100302746 | 6.305685134  | 7.197895  | 5.413475306  | 8.946835015  | 5.611212266  | 2.275589517  |
| 100306975 | 5.370483827  | 5.6886226 | 6.006761467  | -0.352108471 | -0.352108471 | -0.352108471 |
| 100309464 | 4.412824513  | 4.6756983 | 4.544261391  | 0.624614178  | 0.440372779  | 0.808855576  |
| 100313796 | 7.384321494  | 4.3215534 | 5.852937462  | 4.797006422  | 3.042005449  | 3.919505936  |
| 100313865 | 6.276131817  | 7.1577076 | 8.039283402  | -0.352108471 | -0.352108471 | -0.352108471 |
| 100316904 | -0.352108471 | -0.352108 | -0.352108471 | 5.983736712  | 5.436324997  | 6.531148427  |
| 100335030 | 7.112913835  | 6.4125415 | 5.712169066  | 5.170565066  | 6.671548634  | 8.172532203  |
| 100379571 | 3.597748589  | 4.4336808 | 5.26961299   | 5.680349863  | 3.820978157  | 1.96160645   |
| 100419583 | 4.552679654  | 2.5530733 | 0.553466939  | -0.352108471 | -0.352108471 | -0.352108471 |
| 100419743 | 8.934815581  | 7.6894359 | 10.18019526  | 6.811762296  | 8.597145682  | 7.704453989  |
| 100420587 | 8.710776712  | 5.8275854 | 7.269181038  | 9.310773304  | 4.468703989  | 6.889738646  |
| 100462977 | 8.973010505  | 9.3530434 | 9.163026968  | 9.022833616  | 8.645133758  | 8.833983687  |
| 100462981 | 10.80677072  | 13.057697 | 8.555844046  | 10.97038763  | 10.46808925  | 9.965790881  |
| 100462983 | 3.07615903   | 7.054009  | 5.065084027  | 3.597628112  | 3.762355996  | 3.679992054  |
| 100463289 | 6.037807317  | 5.4397245 | 4.841641627  | 4.76431248   | 3.07604078   | 1.38776908   |
| 100463482 | 8.166673639  | 8.535703  | 8.904732444  | 7.146480757  | 7.723482864  | 6.569478649  |
| 100463486 | 11.00559925  | 10.606781 | 10.80619016  | 9.507655551  | 8.710935774  | 10.30437533  |
| 100463487 | 7.964028563  | 9.3643842 | 8.664206359  | 7.120490641  | 9.772620848  | 8.446555745  |
| 100463488 | 5.830939431  | 5.5882244 | 6.073654487  | 2.221964512  | 2.191310813  | 2.252618212  |
| 100499466 | 5.980186278  | 5.4364282 | 5.708307224  | 5.525865331  | 4.930663214  | 6.121067448  |
| 100499483 | 5.463922025  | 6.7666215 | 4.161222578  | 4.512821737  | -0.176611651 | 2.168105043  |
| 100505477 | 4.169848031  | 5.9953913 | 5.082619672  | -0.352108471 | -0.352108471 | -0.352108471 |
| 100505478 | -0.352108471 | -0.352108 | -0.352108471 | 2.38621749   | 6.167503983  | -1.395069002 |
| 100505495 | 4.424692132  | 5.549469  | 4.987080576  | 3.923203137  | 3.99316708   | 3.853239194  |
| 100505532 | -0.352108471 | -0.352108 | -0.352108471 | 7.472116188  | 3.814964051  | 5.64354012   |
| 100505534 | 4.819685928  | 5.5438096 | 5.181747782  | -0.352108471 | -0.352108471 | -0.352108471 |
| 100505547 | 6.273832259  | 6.5780759 | 5.969588655  | -0.352108471 | -0.352108471 | -0.352108471 |

|           |              |           |              |              |              |              |
|-----------|--------------|-----------|--------------|--------------|--------------|--------------|
| 100505566 | 4.013028315  | 7.2157186 | 0.810338079  | 4.407187888  | 2.627398558  | 0.847609227  |
| 100505573 | -0.352108471 | -0.352108 | -0.352108471 | 3.99074184   | 6.347573811  | 5.169157826  |
| 100505576 | 7.60286746   | 7.2013529 | 8.00438199   | 3.098679711  | 5.522284255  | 7.945888799  |
| 100505583 | 6.056053999  | 6.7490886 | 5.363019386  | -0.352108471 | -0.352108471 | -0.352108471 |
| 100505609 | 6.009680338  | 5.6251608 | 5.240641204  | -0.352108471 | -0.352108471 | -0.352108471 |
| 100505621 | 8.964272546  | 9.380969  | 8.547576081  | 8.551289593  | 8.474204208  | 8.628374978  |
| 100505633 | 6.551825805  | 6.3152311 | 6.788420481  | 4.655759405  | 4.245214285  | 5.066304524  |
| 100505641 | 4.178899946  | 4.2452143 | 4.112585606  | 1.218975116  | 0.440372779  | 1.997577452  |
| 100505650 | 7.675801096  | 7.5842785 | 7.767323737  | 7.061166384  | 6.672196951  | 7.450135817  |
| 100505659 | 5.468819781  | 5.3910182 | 5.313216548  | 3.923814016  | 5.95428886   | 7.984763704  |
| 100505664 | -0.352108471 | -0.352108 | -0.352108471 | 4.233855154  | 7.73361827   | 5.983736712  |
| 100505676 | 7.92672776   | 5.3767238 | 6.651725767  | 1.997577452  | -1.794744538 | 5.789899442  |
| 100505727 | -0.352108471 | -0.352108 | -0.352108471 | 2.204376426  | 1.273088389  | 3.135664463  |
| 100505728 | 5.876276997  | 6.1945795 | 5.557974474  | -0.352108471 | -0.352108471 | -0.352108471 |
| 100505741 | -0.352108471 | -0.352108 | -0.352108471 | 3.981228639  | 4.843308497  | 3.119148782  |
| 100505746 | -0.352108471 | -0.352108 | -0.352108471 | 2.469725738  | 2.836168613  | 2.103282862  |
| 100505768 | -0.352108471 | -0.352108 | -0.352108471 | 6.165870606  | 6.468860513  | 5.862880699  |
| 100505776 | 4.214046665  | 6.6583352 | 5.436190922  | 0.854785337  | 6.55475994   | 3.704772639  |
| 100505795 | -0.352108471 | -0.352108 | -0.352108471 | 6.501802117  | 3.618783359  | 5.060292738  |
| 100505806 | 6.242048279  | 6.2558778 | 6.228218771  | 6.890254017  | 6.907463027  | 6.873045007  |
| 100505811 | 5.599077984  | 3.874921  | 7.323234927  | 7.655347763  | 5.47633612   | 3.297324477  |
| 100505812 | 4.433680789  | 3.6854445 | 5.181917044  | 1.290035436  | 1.14221151   | 1.437859363  |
| 100505817 | 6.170281192  | 4.0890016 | 5.129641382  | -0.352108471 | -0.352108471 | -0.352108471 |
| 100505876 | 7.585390785  | 7.5821735 | 7.588608089  | 6.683949098  | 6.617035395  | 6.750862801  |
| 100505881 | 6.413173056  | 7.4427409 | 5.383605256  | 4.326502696  | 4.736526515  | 3.916478878  |
| 100505915 | 7.050880463  | 7.0683905 | 7.033370399  | -0.352108471 | -0.352108471 | -0.352108471 |
| 100505989 | 5.704193438  | 7.1675494 | 8.630905282  | 6.00998441   | 6.371856746  | 5.648112075  |
| 100505994 | 1.383520155  | -0.352108 | 3.119148782  | 1.454895716  | 2.100935855  | 0.808855576  |
| 100506007 | 7.624244847  | 7.4792768 | 7.334308775  | -0.352108471 | -0.352108471 | -0.352108471 |
| 100506012 | 3.733128669  | 5.1529298 | 6.572730904  | -0.352108471 | -0.352108471 | -0.352108471 |
| 100506013 | 7.30256871   | 6.2420483 | 5.181527848  | -0.352108471 | -0.352108471 | -0.352108471 |
| 100506022 | 4.317298305  | 4.803618  | 5.289937705  | 4.065642901  | 3.064586224  | 2.063529546  |
| 100506023 | 6.073694796  | 6.5712473 | 6.32247105   | 5.964157879  | 6.004373062  | 5.984265471  |
| 100506033 | 6.354439508  | 5.5985342 | 7.110344824  | 2.02034096   | 2.231655729  | 1.809026191  |
| 100506060 | 7.241080306  | 8.1332833 | 9.025486343  | 6.877892015  | 7.195390655  | 7.036641335  |
| 100506083 | 4.851734675  | 3.9346201 | 5.76884929   | 3.880482573  | 7.178501171  | 5.529491872  |
| 100506085 | 6.720916484  | 6.7174473 | 6.724385635  | 0.440372779  | 0.440372779  | 0.440372779  |
| 100506119 | 6.65994771   | 4.9704738 | 3.280999913  | -0.352108471 | -0.352108471 | -0.352108471 |
| 100506123 | 6.061443125  | 4.4306707 | 5.246056936  | -0.352108471 | -0.352108471 | -0.352108471 |
| 100506124 | -0.352108471 | -0.352108 | -0.352108471 | 5.529311366  | 5.529311366  | 5.529311366  |
| 100506127 | 8.162935329  | 9.4415973 | 6.884273359  | 6.677377896  | 5.438642631  | 6.058010264  |
| 100506178 | 3.41960233   | 3.1277379 | 2.835873421  | 4.670941474  | 3.402425854  | 4.036683664  |
| 100506190 | 6.434445821  | 9.1538721 | 3.715019519  | 2.064739793  | 2.252618212  | 1.876861374  |
| 100506211 | 4.21321388   | 5.7429572 | 7.272700451  | 6.752332956  | 5.17119118   | 5.961762068  |
| 100506215 | 7.618125877  | 9.7470534 | 5.489198398  | 5.712263427  | 5.731413688  | 5.693113166  |
| 100506217 | -0.352108471 | -0.352108 | -0.352108471 | 6.28946978   | 4.964541288  | 5.627005534  |
| 100506248 | -0.352108471 | -0.352108 | -0.352108471 | 3.081409479  | 1.731739118  | 4.43107984   |

|           |              |           |              |              |              |              |
|-----------|--------------|-----------|--------------|--------------|--------------|--------------|
| 100506305 | 5.021893812  | 8.4738855 | 6.747889644  | 3.47770936   | 5.354454372  | 4.416081866  |
| 100506334 | 10.18208261  | 9.7845569 | 9.983319737  | 7.896677475  | 9.208129949  | 10.51958242  |
| 100506376 | 7.735551336  | 5.500886  | 6.618218658  | 1.374300821  | 0.808855576  | 1.939746065  |
| 100506385 | 6.840029989  | 5.5425257 | 8.137534304  | 5.54524521   | 5.624920123  | 5.465570297  |
| 100506392 | 5.919459543  | 5.0916698 | 6.747249254  | -0.352108471 | -0.352108471 | -0.352108471 |
| 100506394 | 7.846085362  | 7.428576  | 7.637330686  | 5.698930132  | 5.665251835  | 5.631573539  |
| 100506444 | 4.149549778  | 6.0481973 | 2.250902235  | 3.222881898  | 4.312084516  | 3.767483207  |
| 100506469 | 3.87583822   | 4.0310378 | 4.18623739   | 2.738485171  | 1.509536442  | 0.280587712  |
| 100506472 | 4.878665478  | 2.3521284 | 7.405202581  | 5.573019814  | 6.670158794  | 6.121589304  |
| 100506476 | 6.731869951  | 3.0765924 | 4.904231184  | 1.060446687  | 1.727216326  | 2.393985965  |
| 100506492 | 0.775109013  | 1.5010176 | 2.226926156  | 1.337894877  | 2.212189733  | 3.086484589  |
| 100506495 | 5.357984451  | 5.283117  | 5.432851874  | 0.228373553  | 0.808855576  | -0.352108471 |
| 100506504 | 9.121866293  | 4.7051115 | 6.913488898  | -0.352108471 | -0.352108471 | -0.352108471 |
| 100506532 | 6.433318728  | 5.2420678 | 7.624569647  | -0.352108471 | -0.352108471 | -0.352108471 |
| 100506548 | 4.162220877  | 6.1404366 | 5.151328716  | 7.637458303  | 4.880328202  | 6.258893253  |
| 100506551 | 7.692413376  | 7.7313381 | 7.653488636  | 7.035244821  | 7.3720224    | 6.698467242  |
| 100506555 | 6.074913188  | 6.8524366 | 6.463674915  | -0.352108471 | -0.352108471 | -0.352108471 |
| 100506596 | 4.117696434  | 1.9715532 | 6.263839711  | 2.618057952  | 5.588224375  | -0.352108471 |
| 100506599 | 4.736638248  | 4.9140225 | 4.559254036  | 3.196376711  | 4.245214285  | 2.147539136  |
| 100506603 | 6.141253736  | 6.0734373 | 6.005620908  | 3.592345606  | 5.842426786  | 8.092507965  |
| 100506621 | 6.689815331  | 6.1039214 | 6.396868383  | -0.352108471 | -0.352108471 | -0.352108471 |
| 100506627 | 5.485331377  | 6.2752044 | 5.880267911  | 0.721578631  | 1.14221151   | 1.562844388  |
| 100506634 | 8.879682209  | 9.8042101 | 10.72873809  | 9.083144505  | 9.045726342  | 9.008308179  |
| 100506637 | 9.417455405  | 7.4264413 | 8.421948362  | 9.217664463  | 5.390634204  | 7.304149333  |
| 100506658 | 6.12526732   | 8.1806123 | 7.152939819  | 4.174472381  | 2.098181557  | 3.136326969  |
| 100506679 | 2.972455137  | 4.1818679 | 5.391280624  | 2.460720591  | 3.253150981  | 1.668290201  |
| 100506688 | 7.295688755  | 7.4239334 | 7.167444067  | 4.450744817  | 3.337746555  | 5.563743079  |
| 100506697 | 4.150643996  | 3.0982686 | 3.624456288  | 6.660249617  | 5.884416135  | 7.436083099  |
| 100506710 | -0.352108471 | -0.352108 | -0.352108471 | 5.886425029  | 10.53963486  | 1.233215197  |
| 100506714 | 4.463716617  | 6.3034612 | 8.143205873  | 5.859617369  | 6.359615552  | 5.359619186  |
| 100506730 | 8.712413858  | 1.3637643 | 5.038089054  | 1.05704313   | 2.352760652  | -0.238674391 |
| 100506736 | 6.183964016  | 7.1243353 | 5.243592684  | -0.352108471 | -0.352108471 | -0.352108471 |
| 100506742 | 5.493783215  | 2.9014243 | 8.086142146  | -0.352108471 | -0.352108471 | -0.352108471 |
| 100506746 | 6.033596974  | 5.873346  | 6.193847962  | 1.814585088  | 1.437859363  | 2.191310813  |
| 100506749 | -0.352108471 | -0.352108 | -0.352108471 | 6.416697544  | 6.087644454  | 5.758591365  |
| 100506757 | 1.392109249  | 3.136327  | -0.352108471 | 5.704335255  | 5.308347618  | 6.100322892  |
| 100506759 | 4.739268142  | 3.5151412 | 2.29101433   | 5.800199788  | 6.607682849  | 4.992716726  |
| 100506769 | 1.891775157  | 2.6505957 | 3.409416183  | -0.352108471 | -0.352108471 | -0.352108471 |
| 100506783 | 5.391018164  | 5.3835036 | 5.398532684  | -0.352108471 | -0.352108471 | -0.352108471 |
| 100506801 | -0.352108471 | -0.352108 | -0.352108471 | 7.692954228  | 4.66005769   | 1.627161151  |
| 100506826 | -0.352108471 | -0.352108 | -0.352108471 | 2.38621749   | 5.124543452  | -0.352108471 |
| 100506834 | 6.664657419  | 7.0526396 | 6.85864849   | 1.657360368  | 1.876861374  | 1.437859363  |
| 100506835 | 6.579604628  | 7.0871828 | 7.594761031  | -0.352108471 | -0.352108471 | -0.352108471 |
| 100506858 | 4.161208001  | 6.5373837 | 8.913559448  | -0.352108471 | -0.352108471 | -0.352108471 |
| 100506881 | 6.081810127  | 6.2432352 | 6.40466022   | 5.10037386   | 4.567936616  | 4.834155238  |
| 100506901 | -0.352108471 | -0.352108 | -0.352108471 | 6.270222109  | 7.376601672  | 5.163842545  |
| 100506930 | 6.779094686  | 7.8857032 | 8.992311811  | 5.608062679  | 4.485523326  | 5.046793002  |

|           |              |           |              |              |              |              |
|-----------|--------------|-----------|--------------|--------------|--------------|--------------|
| 100506990 | 2.977745599  | 6.9162688 | 4.947007189  | 0.044132154  | -0.352108471 | 0.440372779  |
| 100506994 | 5.851448667  | 7.568737  | 6.710092826  | 5.925900831  | 5.473956012  | 6.37784565   |
| 100507003 | -0.352108471 | -0.352108 | -0.352108471 | 4.66005769   | 4.688318557  | 4.631796822  |
| 100507032 | 6.038177363  | 6.479333  | 5.597021732  | 1.697414861  | 1.14221151   | 2.252618212  |
| 100507043 | 1.383520155  | -0.352108 | 3.119148782  | 4.583433279  | 5.054280952  | 4.112585606  |
| 100507050 | -0.352108471 | -0.352108 | -0.352108471 | 4.927679215  | 4.954218546  | 4.901139884  |
| 100507056 | 3.41407487   | 3.3694434 | 3.458706305  | 4.018998419  | 6.204656258  | 8.390314097  |
| 100507099 | 8.083335993  | 8.484805  | 8.284070521  | 5.863122202  | 6.333759457  | 6.098440829  |
| 100507117 | 4.750181605  | 9.1014762 | 6.925828885  | 4.110546098  | 4.73755266   | 5.364559222  |
| 100507131 | 6.267656397  | 7.8014657 | 9.335274935  | 6.926938623  | 4.989564878  | 8.864312367  |
| 100507156 | 4.028491804  | 4.1460235 | 4.087257665  | 2.12839562   | 2.791013268  | 2.459704444  |
| 100507171 | 2.032840233  | 5.1296414 | 8.226442532  | 3.94669085   | 0.499242608  | 7.394139091  |
| 100507173 | 5.224957289  | 5.417548  | 5.321252663  | 4.535401412  | 7.083611396  | 5.809506404  |
| 100507175 | 5.557045014  | 5.7155573 | 5.398532684  | 1.371545024  | 1.305230684  | 1.437859363  |
| 100507178 | 7.815126942  | 4.9808044 | 10.64944948  | 6.774540384  | 6.538191011  | 7.010889757  |
| 100507217 | -0.352108471 | -0.352108 | -0.352108471 | 4.456886199  | 4.482692559  | 4.43107984   |
| 100507236 | 7.218664846  | 6.6632761 | 6.107887289  | 7.25758336   | 6.316270247  | 5.374957134  |
| 100507246 | 8.221025114  | 4.1730525 | 6.197038815  | 5.217592704  | 7.644891787  | 6.431242245  |
| 100507290 | 6.71500546   | 6.0404998 | 6.377752623  | 7.001809086  | 5.791927679  | 6.396868383  |
| 100507321 | 7.276703885  | 7.1385499 | 7.00039595   | 6.650500242  | 7.249321749  | 6.051678734  |
| 100507336 | -0.352108471 | -0.352108 | -0.352108471 | 4.846943929  | 5.915408166  | 6.983872402  |
| 100507373 | 6.735779686  | 6.3070145 | 7.164544881  | -0.352108471 | -0.352108471 | -0.352108471 |
| 100507395 | 6.369156591  | 6.3935345 | 6.344778649  | -0.352108471 | -0.352108471 | -0.352108471 |
| 100507412 | 10.22759617  | 10.583313 | 9.87187898   | 11.31710026  | 9.029935741  | 6.742771225  |
| 100507424 | -0.352108471 | -0.352108 | -0.352108471 | 5.165434699  | 4.926927932  | 5.046181316  |
| 100507428 | 6.970773049  | 7.2698636 | 7.568954175  | 6.262318958  | 6.629118201  | 6.445718579  |
| 100507431 | 6.808720513  | 7.2622793 | 6.355161685  | 3.820525905  | 4.954218546  | 2.686833264  |
| 100507436 | 2.760618758  | 5.873346  | -0.352108471 | 1.117721484  | 1.305230684  | 0.930212283  |
| 100507460 | 6.364461518  | 7.533337  | 8.702212427  | 4.80208491   | 4.843308497  | 4.760861323  |
| 100507501 | 3.059467309  | 4.4333835 | 5.807299712  | 5.523239719  | 7.25482461   | 3.791654829  |
| 100507507 | 6.801813774  | 6.8152071 | 6.788420481  | -0.352108471 | -0.352108471 | -0.352108471 |
| 100507513 | 5.749402114  | 5.7752316 | 5.723572646  | -0.352108471 | -0.352108471 | -0.352108471 |
| 100507516 | 7.305341479  | 8.1372473 | 6.473435614  | 0.872801732  | 0.440372779  | 1.305230684  |
| 100507524 | 10.8705125   | 10.870512 | 10.8705125   | 9.632852697  | 9.535687614  | 9.73001778   |
| 100507533 | 6.939808856  | 7.4494081 | 7.194608474  | -0.352108471 | -0.352108471 | -0.352108471 |
| 100507577 | 5.526269952  | 6.3324667 | 7.138663385  | 2.018703435  | 5.709342649  | 3.864023042  |
| 100507582 | 5.357984451  | 5.3507587 | 5.365210183  | 3.687748495  | 4.182695441  | 4.677642388  |
| 100507584 | 5.308716024  | 5.2396395 | 5.17056307   | 5.839632047  | 5.945858472  | 5.733405623  |
| 100507588 | 4.025829494  | 6.5441192 | 5.284974356  | -0.352108471 | -0.352108471 | -0.352108471 |
| 100507616 | 9.308742826  | 5.2639065 | 7.286324647  | -0.352108471 | -0.352108471 | -0.352108471 |
| 100507629 | 6.456494764  | 6.7357797 | 7.015064609  | -0.352108471 | -0.352108471 | -0.352108471 |
| 100507632 | 4.119761196  | 6.2420483 | 8.364335362  | -0.352108471 | -0.352108471 | -0.352108471 |
| 100507639 | 7.544161386  | 5.3141829 | 3.084204395  | -0.352108471 | -0.352108471 | -0.352108471 |
| 100507642 | 6.640019393  | 6.517941  | 6.762097775  | -0.352108471 | -0.352108471 | -0.352108471 |
| 100507651 | -0.352108471 | -0.352108 | -0.352108471 | 5.223343677  | 5.095423988  | 4.967504298  |
| 100507679 | 7.18462267   | 7.1464808 | 7.222764584  | 0.395051519  | 1.14221151   | -0.352108471 |
| 100509894 | 5.493095576  | 6.916299  | 8.339502466  | 4.53499238   | 3.045613449  | 6.024371311  |



|           |              |           |              |              |              |              |
|-----------|--------------|-----------|--------------|--------------|--------------|--------------|
| 100526783 | 0.500398845  | 6.5554341 | 3.527916452  | 2.359319907  | 1.388378921  | 1.873849414  |
| 100526830 | -0.352108471 | -0.352108 | -0.352108471 | 6.152314334  | 4.842884858  | 3.533455382  |
| 100527964 | 6.484281017  | 6.4636749 | 6.443068813  | -0.352108471 | -0.352108471 | -0.352108471 |
| 100528007 | 6.45963463   | 5.9258255 | 6.192730084  | 4.233779363  | 2.313289664  | 0.392799966  |
| 100528022 | 4.182087776  | 7.7785803 | 5.980334028  | 2.481575183  | 5.315258837  | -0.352108471 |
| 100528030 | 5.729853661  | 4.4868934 | 3.243933226  | 1.657360368  | 1.876861374  | 1.437859363  |
| 100529209 | -0.352108471 | -0.352108 | -0.352108471 | 7.004646402  | 4.767082708  | 2.529519015  |
| 100529239 | 4.692371316  | 5.3889268 | 6.085482282  | 5.951161712  | 4.866065849  | 7.036257576  |
| 100533105 | 5.168704884  | 3.4624462 | 4.315575532  | 1.918895351  | 2.191310813  | 1.646479888  |
| 100533177 | -0.352108471 | -0.352108 | -0.352108471 | 4.970473812  | 6.4346232    | 3.506324423  |
| 100533182 | 7.878030571  | 6.3072687 | 4.736506872  | 5.2185599    | 5.957888849  | 5.588224375  |
| 100533789 | 10.34243084  | 8.3981147 | 6.453798619  | 6.574085782  | 7.514364071  | 7.044224926  |
| 100533970 | 8.203621941  | 8.4092908 | 8.306456348  | 6.677703761  | 6.260622078  | 7.094785444  |
| 100534012 | 6.294300225  | 6.6959853 | 6.495142767  | 5.804562573  | 7.79988811   | 6.802225342  |
| 100616668 | 2.379164056  | 0.6228711 | 1.501017585  | 9.922559147  | 5.909748525  | 1.896937903  |
| 100652739 | -0.352108471 | -0.352108 | -0.352108471 | 2.313941724  | -0.352108471 | 4.979991919  |
| 100652748 | 6.233801298  | 4.6590193 | 3.084237322  | 4.004921698  | 6.60492871   | 5.304925204  |
| 100652759 | -0.352108471 | -0.352108 | -0.352108471 | 0.874413692  | 2.100935855  | -0.352108471 |
| 100652772 | 6.668893685  | 6.0023087 | 7.335478698  | 3.44626434   | 3.337746555  | 3.554782125  |
| 100652833 | 5.852937462  | 5.873346  | 5.832528937  | -0.352108471 | -0.352108471 | -0.352108471 |
| 100652846 | -0.352108471 | -0.352108 | -0.352108471 | 3.180447167  | 1.90830372   | 0.636160272  |
| 100652901 | 10.44157452  | 10.165379 | 10.71776974  | 7.942682924  | 11.11822571  | 9.530454315  |
| 100652929 | 7.392944949  | 6.2231429 | 8.562747011  | 7.050965989  | 6.242392959  | 5.433819929  |
| 100653061 | 2.201036472  | -0.352108 | 4.754181416  | 1.179289842  | 1.549724107  | 0.808855576  |
| 100653233 | 5.201288977  | 5.1847699 | 5.168250812  | -0.352108471 | -0.352108471 | -0.352108471 |
| 100750225 | 5.92524845   | 5.6613207 | 5.397393041  | 3.200243148  | 5.243942167  | 7.287641187  |
| 100775104 | -0.352108471 | -0.352108 | -0.352108471 | 5.88700099   | 5.893442277  | 5.880559702  |
| 100775107 | 6.408050094  | 7.6087389 | 5.207361299  | 0.872801732  | 0.440372779  | 1.305230684  |
| 100820709 | 5.658783754  | 7.1941471 | 4.123420449  | 4.591397191  | 5.525865331  | 6.460333472  |
| 100846978 | 14.26064462  | 13.408044 | 12.55544429  | 13.65479255  | 13.16129636  | 13.40804445  |
| 100852408 | 7.087105625  | 2.8069088 | 4.947007189  | -0.352108471 | -0.352108471 | -0.352108471 |
| 100859921 | 2.764225616  | -0.352108 | 5.880559702  | 2.634592538  | -0.352108471 | 5.621293547  |
| 100861412 | 5.311892488  | 4.5821219 | 4.947007189  | 0.927192453  | 1.807952763  | 2.688713073  |
| 100861437 | -0.352108471 | -0.352108 | -0.352108471 | 4.113585595  | 5.511864271  | 6.910142947  |
| 100861504 | 5.217491139  | 4.5465207 | 5.888461528  | -0.352108471 | -0.352108471 | -0.352108471 |
| 100861532 | 12.14765807  | 11.283307 | 13.01200934  | 13.0724719   | 9.667599279  | 11.37003559  |
| 100861542 | 1.392109249  | 3.136327  | -0.352108471 | 4.571042117  | 5.095423988  | 5.619805859  |
| 100861549 | 6.98777334   | 8.1525971 | 7.570185228  | 6.000135948  | 6.917282891  | 6.45870942   |
| 100861555 | -0.352108471 | -0.352108 | -0.352108471 | 6.406486527  | 6.054765778  | 6.758207276  |
| 100862680 | 9.469543183  | 11.302183 | 7.636902938  | 8.603890228  | 8.526024375  | 8.681756082  |
| 100862704 | 2.681724436  | 5.7155573 | -0.352108471 | 0.044132154  | 0.440372779  | -0.352108471 |
| 100873165 | 1.924048886  | 1.0779863 | 1.501017585  | 7.905324643  | 6.235921161  | 4.566517679  |
| 100873964 | 4.58739024   | 3.136327  | 6.038453511  | -0.352108471 | -0.352108471 | -0.352108471 |
| 100873974 | -0.352108471 | -0.352108 | -0.352108471 | 2.301055037  | 4.954218546  | -0.352108471 |
| 100873979 | 6.056053999  | 6.0736545 | 6.038453511  | -0.352108471 | -0.352108471 | -0.352108471 |
| 100874019 | 9.497739328  | 8.785672  | 8.073604611  | 6.798638809  | 7.812123768  | 8.825608726  |
| 100874058 | 5.871254895  | 3.7394027 | 8.003107131  | 2.958541694  | 3.919505936  | 1.997577452  |

|           |              |           |              |              |              |              |
|-----------|--------------|-----------|--------------|--------------|--------------|--------------|
| 100874079 | 6.394537636  | 5.7940988 | 6.994976515  | 3.727794797  | 5.24599209   | 4.486893444  |
| 100874083 | -0.352108471 | -0.352108 | -0.352108471 | 1.631676003  | -0.44942765  | 3.712779657  |
| 100874095 | 3.527916452  | 5.152872  | 1.902960944  | 0.570011001  | 4.899219042  | 2.734615022  |
| 100874123 | 8.633374294  | 9.4213439 | 9.027359077  | 7.438805957  | 7.419406972  | 7.458204942  |
| 100874126 | -0.352108471 | -0.352108 | -0.352108471 | 1.793112977  | 1.646479888  | 1.939746065  |
| 100874151 | 1.383520155  | -0.352108 | 3.119148782  | 2.53473567   | 5.421579811  | -0.352108471 |
| 100874167 | -0.352108471 | -0.352108 | -0.352108471 | 5.133308083  | 5.438960411  | 5.744612738  |
| 100874198 | 5.156684974  | 5.3130538 | 5.234869379  | 1.631676003  | 3.615460478  | -0.352108471 |
| 100874211 | -0.352108471 | -0.352108 | -0.352108471 | 3.366285451  | 2.252618212  | 1.138950972  |
| 100874214 | 3.761131874  | 5.7925837 | 1.729680021  | 2.379793093  | 6.863760789  | 4.621776941  |
| 100874243 | 9.580558577  | 7.9505586 | 6.32055856   | 7.883223243  | 6.682822443  | 5.482421642  |
| 100874278 | -0.352108471 | -0.352108 | -0.352108471 | 6.111249662  | 3.923023209  | 5.017136436  |
| 100874300 | 5.04287137   | 4.0495704 | 3.056269331  | -0.352108471 | -0.352108471 | -0.352108471 |
| 100874370 | -0.352108471 | -0.352108 | -0.352108471 | 4.557059531  | 6.717533827  | 5.637296679  |
| 100885776 | 11.43752948  | 15.037546 | 13.23753795  | 12.31098812  | 13.22493522  | 12.76796167  |
| 100885779 | 5.117879811  | 5.6641565 | 5.391018164  | 5.002357752  | 5.984600755  | 5.493479254  |
| 100885795 | 4.782630369  | 8.6110951 | 6.696862741  | 3.957701248  | 4.66152415   | 5.365347052  |
| 100885848 | 5.6678354    | 4.8505978 | 4.033360215  | 1.731739118  | 1.731739118  | 1.731739118  |
| 100886964 | 7.069285813  | 8.1481099 | 9.226934059  | 5.587484762  | 10.07320548  | 7.830345121  |
| 100887750 | 6.074601444  | 5.3089485 | 4.543295563  | 4.200472614  | 3.401368727  | 3.80092067   |
| 100996249 | -0.352108471 | -0.352108 | -0.352108471 | 4.247194404  | 5.253374746  | 6.259555088  |
| 100996251 | 8.044216423  | 8.4413207 | 7.647112169  | 6.573293172  | 7.10166618   | 7.630039188  |
| 100996273 | 5.869175118  | 9.9939326 | 7.931553871  | 4.529904824  | 8.008689914  | 6.269297369  |
| 100996279 | 6.519673958  | 4.1228842 | 8.916463723  | 6.413268661  | 4.792646314  | 3.172023967  |
| 100996291 | 10.22675527  | 4.2776579 | 7.252206581  | 2.553539015  | 7.050630806  | 4.80208491   |
| 100996295 | 5.032668174  | 6.1515856 | 7.270503083  | 5.479933443  | 5.899220491  | 5.060646394  |
| 100996307 | 5.284974356  | 5.7539737 | 4.815974971  | -0.352108471 | -0.352108471 | -0.352108471 |
| 100996338 | -0.352108471 | -0.352108 | -0.352108471 | 5.821410838  | 5.23896625   | 6.403855425  |
| 100996447 | 6.074121915  | 5.2110495 | 6.937194367  | 5.411542568  | 5.388370172  | 5.365197775  |
| 100996521 | -0.352108471 | -0.352108 | -0.352108471 | 3.903344077  | -0.700670423 | 1.601336827  |
| 100996541 | 4.121846117  | 3.4216545 | 4.822037705  | 0.975533543  | 0.808855576  | 1.14221151   |
| 100996573 | 5.888869469  | 5.8617144 | 5.834559354  | 1.5207156    | 2.232575625  | 0.808855576  |
| 100996582 | 6.191190925  | 7.6165571 | 4.765824798  | 4.156393209  | 7.040995723  | 9.925598237  |
| 100996598 | 5.613270467  | 6.8461728 | 6.229721613  | 1.72397541   | 3.198539975  | 4.673104541  |
| 100996624 | -0.352108471 | -0.352108 | -0.352108471 | 4.188977125  | 5.169157826  | 6.149338526  |
| 100996681 | 5.268109931  | 4.7139222 | 4.159734512  | 0.228373553  | 0.808855576  | -0.352108471 |
| 100996693 | -0.352108471 | -0.352108 | -0.352108471 | 4.39174529   | 0.017007562  | 2.204376426  |
| 100996702 | 7.678496069  | 6.4023916 | 8.954600531  | 5.312246344  | 6.12823701   | 6.944227676  |
| 100996713 | -0.352108471 | -0.352108 | -0.352108471 | 4.91770573   | 4.324959533  | 5.510451928  |
| 100996717 | 4.186705969  | 5.2174911 | 6.24827631   | -0.352108471 | -0.352108471 | -0.352108471 |
| 100996724 | -0.352108471 | -0.352108 | -0.352108471 | 6.074134525  | 5.776694563  | 5.479254601  |
| 100996738 | 5.611850338  | 5.2068303 | 6.01687034   | -0.352108471 | -0.352108471 | -0.352108471 |
| 100996930 | -0.352108471 | -0.352108 | -0.352108471 | 6.532441983  | 3.660133932  | 9.404750034  |
| 101059936 | 4.975875769  | 4.5788011 | 4.181726524  | -0.352108471 | -0.352108471 | -0.352108471 |
| 101060017 | 1.392109249  | 3.136327  | -0.352108471 | 2.039485684  | -0.352108471 | 4.43107984   |
| 101060097 | 6.214743625  | 7.4900233 | 4.939463991  | 0.044132154  | -0.352108471 | 0.440372779  |
| 101060177 | 3.660099283  | 5.7677452 | 4.713922221  | -0.352108471 | -0.352108471 | -0.352108471 |

|           |              |           |              |              |              |              |
|-----------|--------------|-----------|--------------|--------------|--------------|--------------|
| 101060187 | 7.150675788  | 5.7494021 | 4.348128441  | -0.352108471 | -0.352108471 | -0.352108471 |
| 101060226 | -0.352108471 | -0.352108 | -0.352108471 | 2.169424975  | 1.23880364   | 3.100046309  |
| 101060254 | 5.688622647  | 6.3217343 | 5.055511004  | -0.352108471 | -0.352108471 | -0.352108471 |
| 101060275 | 6.448663762  | 6.1995956 | 5.950527502  | 0.044132154  | 0.440372779  | -0.352108471 |
| 101060322 | 7.459870921  | 3.2436936 | 5.351782282  | 1.58479924   | 1.437859363  | 1.731739118  |
| 101060328 | 3.127737875  | 5.0059245 | 1.249551269  | 0.24978      | 2.605817304  | 4.961854607  |
| 101060373 | -0.352108471 | -0.352108 | -0.352108471 | 1.880238567  | -0.352108471 | 4.112585606  |
| 101060398 | -0.352108471 | -0.352108 | -0.352108471 | 5.64354012   | 5.023044807  | 6.264035433  |
| 101060429 | 6.571654576  | 5.3085806 | 4.045506658  | 5.86372365   | 5.881326627  | 5.898929603  |
| 101060445 | 6.962165162  | 10.855734 | 8.908949447  | 7.118409184  | 4.811572158  | 9.42524621   |
| 101060542 | 3.124254617  | 4.7970985 | 3.960676558  | 3.828080288  | 0.663999426  | 6.99216115   |
| 101060604 | 3.41407487   | 3.136327  | 3.69182277   | 0.82273449   | 1.997577452  | -0.352108471 |
| 101060691 | 3.245235305  | 3.136327  | 3.354143641  | 2.301055037  | 4.954218546  | -0.352108471 |
| 101060825 | 2.065292044  | -0.352108 | 4.482692559  | 0.793818797  | 1.939746065  | -0.352108471 |
| 101101775 | -0.352108471 | -0.352108 | -0.352108471 | 5.287421216  | 5.116246503  | 5.201833859  |
| 101243545 | -0.352108471 | -0.352108 | -0.352108471 | 2.577576529  | 2.796089998  | 2.686833264  |
| 101243555 | 7.133445996  | 4.8711713 | 6.002308672  | -0.352108471 | -0.352108471 | -0.352108471 |
| 101409256 | 7.428721334  | 7.889817  | 6.967625619  | 10.35776112  | 3.599227082  | 6.978494102  |
| 101409258 | 4.814358965  | 3.9997511 | 5.628966845  | 7.448532665  | 6.635453109  | 5.822373554  |
| 101410538 | -0.352108471 | -0.352108 | -0.352108471 | 3.543647175  | 8.958859847  | 6.251253511  |
| 101410541 | 3.414598071  | 8.9979527 | 6.206275376  | 4.219673638  | 9.013654677  | 6.616664157  |
| 101669764 | 4.731111372  | 4.8304259 | 4.631796822  | 1.640731613  | 1.731739118  | 1.549724107  |
| 101669767 | 7.457846733  | 7.3046105 | 7.151374206  | 7.697567401  | 7.129654683  | 6.561741966  |
| 101752400 | -0.352108471 | -0.352108 | -0.352108471 | 3.416955113  | -0.153603106 | 1.631676003  |
| 101805492 | 7.9900573    | 7.9448756 | 8.035239038  | 7.846725922  | 7.837892631  | 7.855559213  |
| 101867536 | 10.49227718  | 9.2732507 | 8.054224215  | 4.552376253  | 10.70604843  | 7.629212341  |
| 101926889 | 9.907133664  | 10.788949 | 11.67076398  | 7.650460345  | 9.214229956  | 10.77799957  |
| 101926890 | -0.352108471 | -0.352108 | -0.352108471 | 1.901473368  | 2.250571141  | 2.076022254  |
| 101926897 | 5.32386623   | 4.1838641 | 4.753865155  | 8.201527569  | 2.706462118  | 5.453994843  |
| 101926898 | 13.53861591  | 10.184414 | 11.86151496  | 10.65900951  | 10.63610231  | 10.6131951   |
| 101926907 | 6.644956305  | 7.7592588 | 8.873561387  | 6.528404389  | 9.534341235  | 3.522467543  |
| 101926908 | 3.926167062  | 7.7315299 | 5.828848464  | -0.352108471 | -0.352108471 | -0.352108471 |
| 101926911 | 2.718924682  | 5.6884362 | 8.657947775  | 1.518484901  | 1.731739118  | 1.305230684  |
| 101926915 | 6.86259906   | 6.6215439 | 7.103654244  | 4.918926546  | 4.482692559  | 5.355160532  |
| 101926918 | -0.352108471 | -0.352108 | -0.352108471 | 4.66005769   | 3.701594535  | 5.618520844  |
| 101926928 | 7.535667186  | 5.1195655 | 9.951768838  | 6.113029435  | 5.647333551  | 6.57872532   |
| 101926930 | 5.198808809  | 5.4836661 | 5.768523368  | -0.352108471 | -0.352108471 | -0.352108471 |
| 101926935 | 7.00268      | 7.7974494 | 6.207910571  | 8.481573421  | 6.165870606  | 3.850167791  |
| 101926953 | 2.65478974   | -0.352108 | 5.661687951  | -0.352108471 | -0.352108471 | -0.352108471 |
| 101926955 | 4.940612622  | 3.2746177 | 6.606607529  | 4.645563652  | 6.298295008  | 5.47192933   |
| 101926958 | -0.352108471 | -0.352108 | -0.352108471 | 3.264579603  | 6.926268373  | 5.095423988  |
| 101926960 | 3.209772045  | 8.7675562 | 5.988664101  | 1.981180367  | 0.75077525   | 3.211585483  |
| 101926969 | 6.966795335  | 8.3284377 | 7.64761654   | -0.352108471 | -0.352108471 | -0.352108471 |
| 101926984 | -0.352108471 | -0.352108 | -0.352108471 | 5.88700099   | 7.295806839  | 4.478195141  |
| 101926989 | -0.352108471 | -0.352108 | -0.352108471 | 2.397492216  | -0.352108471 | 5.147092904  |
| 101926996 | 8.47548589   | 7.7187703 | 9.232201477  | 6.06683161   | 7.007197297  | 7.947562984  |
| 101927009 | 5.677239679  | 5.825168  | 5.529311366  | 1.640731613  | 1.731739118  | 1.549724107  |

|           |              |           |              |              |              |              |
|-----------|--------------|-----------|--------------|--------------|--------------|--------------|
| 101927016 | 4.600159022  | 6.3691566 | 8.138154159  | -0.352108471 | -0.352108471 | -0.352108471 |
| 101927021 | 1.501017585  | -0.352108 | 3.354143641  | 8.06546056   | 6.796814879  | 5.528169199  |
| 101927030 | -0.352108471 | -0.352108 | -0.352108471 | 10.96152105  | 2.113246397  | 6.537383725  |
| 101927032 | 1.737439106  | 8.6417942 | 5.189616664  | 0.624614178  | 0.440372779  | 0.808855576  |
| 101927034 | 10.86368975  | 13.051971 | 8.675408313  | 9.153716668  | 9.546259259  | 9.349987964  |
| 101927040 | 3.636824788  | 3.9195059 | 3.354143641  | 1.218975116  | 0.440372779  | 1.997577452  |
| 101927045 | 5.522595798  | 4.976516  | 6.068675629  | -0.352108471 | -0.352108471 | -0.352108471 |
| 101927074 | 6.017940363  | 6.5297242 | 6.273832259  | -0.352108471 | -0.352108471 | -0.352108471 |
| 101927088 | -0.352108471 | -0.352108 | -0.352108471 | 6.396868383  | 6.410585269  | 6.383151496  |
| 101927094 | 7.709644288  | 7.2146729 | 6.719701551  | 5.615175082  | 6.610868188  | 7.606561295  |
| 101927131 | 6.290659851  | 4.8020746 | 5.546367231  | 6.238407109  | 7.360256897  | 5.116557322  |
| 101927132 | 5.569305896  | 8.0049622 | 6.787134073  | 3.656418144  | 1.997577452  | 5.315258837  |
| 101927136 | 6.211223246  | 6.5021238 | 6.793024285  | 8.33904221   | 4.726070399  | 6.532556305  |
| 101927150 | 5.953091712  | 7.1319092 | 4.774274269  | 6.214551203  | 5.474812883  | 6.954289524  |
| 101927152 | 6.199130262  | 7.5522806 | 4.845979904  | 5.009972817  | 2.388028312  | 3.699000565  |
| 101927157 | 7.76039587   | 3.3664563 | 5.563426062  | 8.867439673  | 5.552726144  | 2.238012615  |
| 101927166 | 5.027756401  | 6.2848227 | 5.656289537  | 1.427477396  | -0.202941035 | 3.057895826  |
| 101927178 | 1.703814606  | 2.4868796 | 3.269944576  | 1.624492476  | 3.698088569  | 5.771684661  |
| 101927181 | 6.522346096  | 4.6973571 | 8.347335051  | 6.795027168  | 4.641917167  | 8.948137169  |
| 101927190 | -0.352108471 | -0.352108 | -0.352108471 | 4.745251399  | 5.017136436  | 5.289021472  |
| 101927228 | 1.383520155  | -0.352108 | 3.119148782  | 2.19617771   | 4.559699198  | 6.923220687  |
| 101927257 | 8.442468668  | 7.1258056 | 5.809142469  | 6.050474908  | 4.186838295  | 5.118656602  |
| 101927274 | 6.67322099   | 7.9295946 | 5.416847378  | 1.82202867   | 1.646479888  | 1.997577452  |
| 101927279 | 6.809538378  | 8.7559248 | 10.70231129  | 6.201175754  | 7.469697771  | 8.738219789  |
| 101927292 | 2.740210233  | 3.0290686 | 2.451351903  | -0.352108471 | -0.352108471 | -0.352108471 |
| 101927325 | -0.352108471 | -0.352108 | -0.352108471 | 2.397492216  | -0.352108471 | 5.147092904  |
| 101927334 | 2.419557138  | -0.352108 | 5.191222747  | -0.352108471 | -0.352108471 | -0.352108471 |
| 101927337 | 12.05978117  | 12.059781 | 12.05978117  | 12.4424511   | 12.41516276  | 12.46973944  |
| 101927339 | 6.589691005  | 5.6691055 | 7.510276468  | 3.480869363  | 1.646479888  | 5.315258837  |
| 101927340 | 6.867028007  | 6.9515466 | 6.78250938   | 3.38836593   | 0.63603458   | 2.012200255  |
| 101927357 | 6.355926573  | 5.5909139 | 4.825901136  | 3.447009639  | 3.680662938  | 3.914316237  |
| 101927359 | 4.755240115  | 5.7903812 | 3.720099057  | 1.640731613  | 1.549724107  | 1.731739118  |
| 101927374 | 11.50148523  | 11.470359 | 11.53261106  | 10.44579859  | 10.45249577  | 10.4391014   |
| 101927378 | -0.352108471 | -0.352108 | -0.352108471 | 4.625102937  | 5.230255493  | 4.927679215  |
| 101927401 | 6.573968999  | 6.5884653 | 6.559472732  | -0.352108471 | -0.352108471 | -0.352108471 |
| 101927415 | 8.862492035  | 6.2680756 | 7.56528383   | 9.605988581  | 2.861935094  | 6.233961838  |
| 101927419 | 5.990131758  | 5.0635146 | 5.526823203  | 5.219123492  | 6.737999171  | 3.700247812  |
| 101927423 | 5.876327432  | 6.552591  | 6.214459212  | 1.14221151   | 1.14221151   | 1.14221151   |
| 101927446 | 1.863947334  | 1.3921092 | 0.920271164  | 4.116820349  | 1.845238787  | -0.426342774 |
| 101927447 | 5.344042808  | 6.1509366 | 6.95783045   | 0.843916758  | 3.035138754  | 1.939527756  |
| 101927452 | 6.788420481  | 6.4667543 | 7.110086689  | 6.536811004  | 4.984263142  | 5.760537073  |
| 101927476 | 6.708652355  | 9.4527399 | 8.080696104  | 7.616827828  | 7.411978511  | 7.207129195  |
| 101927479 | 6.434445821  | 6.3439771 | 6.524914536  | 2.602306905  | 2.051108653  | 3.153505157  |
| 101927522 | 6.625642623  | 4.7909718 | 5.708307224  | -0.352108471 | -0.352108471 | -0.352108471 |
| 101927526 | -0.352108471 | -0.352108 | -0.352108471 | 2.065292044  | 2.727751458  | 1.40283263   |
| 101927528 | 9.653471396  | 7.0872306 | 4.520989756  | 4.755602447  | 6.863410361  | 5.809506404  |
| 101927550 | 8.93296241   | 2.0059169 | 5.469439637  | 0.044132154  | -0.352108471 | 0.440372779  |

|           |              |           |              |              |              |              |
|-----------|--------------|-----------|--------------|--------------|--------------|--------------|
| 101927556 | 3.127737875  | 3.136327  | 3.119148782  | 5.494417177  | 2.714559209  | 8.274275145  |
| 101927559 | 3.594841197  | 5.0363099 | 4.315575532  | 7.91322227   | 6.900899666  | 5.888577061  |
| 101927562 | 4.323396426  | 5.2849744 | 6.246552286  | -0.352108471 | -0.352108471 | -0.352108471 |
| 101927575 | 7.164717728  | 7.4734848 | 7.319101259  | 6.0669142    | 6.721284839  | 7.375655477  |
| 101927579 | -0.352108471 | -0.352108 | -0.352108471 | 3.169772494  | 2.187592805  | 2.678682649  |
| 101927580 | 8.174508714  | 7.007949  | 5.841389267  | 6.351126145  | 6.42302191   | 6.279230379  |
| 101927585 | -0.352108471 | -0.352108 | -0.352108471 | 5.017136436  | 3.039297998  | 6.994974873  |
| 101927587 | 1.356017291  | 2.874763  | 4.39350866   | 0.624614178  | 0.440372779  | 0.808855576  |
| 101927588 | 5.157610748  | 4.4826926 | 5.832528937  | 1.218975116  | 1.997577452  | 0.440372779  |
| 101927595 | -0.352108471 | -0.352108 | -0.352108471 | 1.336474202  | 2.232575625  | 0.440372779  |
| 101927598 | 6.002308672  | 5.7573212 | 6.247296179  | 2.121209733  | 2.742246626  | 1.50017284   |
| 101927606 | 7.231153032  | 4.9504636 | 6.090808341  | -0.352108471 | -0.352108471 | -0.352108471 |
| 101927610 | 4.582371975  | 6.4450275 | 8.307682927  | 4.72458994   | 5.335500499  | 4.113679381  |
| 101927615 | -0.352108471 | -0.352108 | -0.352108471 | 1.968661759  | 1.997577452  | 1.939746065  |
| 101927619 | 2.567643063  | 0.1993972 | 1.383520155  | 1.239592382  | 2.847531327  | 4.455470273  |
| 101927623 | 2.413921152  | -0.211251 | 5.039093469  | 4.036683664  | 2.560176267  | 5.51319106   |
| 101927652 | 6.677060206  | 3.8928885 | 5.284974356  | -0.352108471 | -0.352108471 | -0.352108471 |
| 101927657 | 3.779740629  | 3.5846224 | 3.682181533  | 5.810583651  | 4.942702387  | 4.074821124  |
| 101927666 | 6.851407316  | 7.3180325 | 7.784657702  | 3.123303237  | 6.215206307  | 9.307109378  |
| 101927667 | 6.640019393  | 7.2961404 | 5.983898352  | 2.886671685  | 6.027100714  | 4.456886199  |
| 101927671 | 2.201036472  | -0.352108 | 4.754181416  | 1.727216326  | 1.807952763  | 1.646479888  |
| 101927678 | 7.149902426  | 2.6064378 | 4.878170137  | 5.258845516  | 1.772255056  | 3.515550286  |
| 101927691 | 8.104788488  | 6.7629397 | 7.433864099  | -0.352108471 | -0.352108471 | -0.352108471 |
| 101927693 | -0.352108471 | -0.352108 | -0.352108471 | 1.268079384  | 2.299318081  | 1.783698732  |
| 101927720 | -0.352108471 | -0.352108 | -0.352108471 | 6.188308708  | 6.47267644   | 6.757044173  |
| 101927723 | 5.038089054  | 4.617923  | 5.458255064  | 1.646479888  | 1.646479888  | 1.646479888  |
| 101927740 | 8.399519058  | 7.4572022 | 9.341835904  | 7.789279214  | 7.351399985  | 8.227158443  |
| 101927741 | -0.352108471 | -0.352108 | -0.352108471 | 2.521016528  | 5.317995343  | 3.919505936  |
| 101927750 | 4.805894371  | 5.4144052 | 4.197383579  | -0.352108471 | -0.352108471 | -0.352108471 |
| 101927752 | -0.352108471 | -0.352108 | -0.352108471 | 2.371379612  | 1.90830372   | 1.445227827  |
| 101927760 | -0.352108471 | -0.352108 | -0.352108471 | 3.245625856  | 3.337746555  | 3.153505157  |
| 101927767 | -0.352108471 | -0.352108 | -0.352108471 | 5.017136436  | 3.57759874   | 6.456674131  |
| 101927770 | 7.121123024  | 3.3358418 | 5.228482407  | 3.61935986   | 0.009810316  | 1.814585088  |
| 101927774 | 6.035394867  | 6.5688561 | 7.102317432  | 3.119148782  | 2.758457771  | 3.479839792  |
| 101927788 | -0.352108471 | -0.352108 | -0.352108471 | 7.230662479  | 4.57685853   | 5.903760504  |
| 101927789 | -0.352108471 | -0.352108 | -0.352108471 | 1.939639127  | 2.147539136  | 1.731739118  |
| 101927793 | -0.352108471 | -0.352108 | -0.352108471 | 4.330998279  | 6.320433877  | 5.325716078  |
| 101927796 | 7.108246235  | 10.942575 | 9.02541086   | 7.532837054  | 5.317328239  | 9.748345868  |
| 101927797 | 7.439907027  | 6.3369206 | 6.888413829  | 6.543375401  | 3.554622972  | 5.048999186  |
| 101927806 | -0.352108471 | -0.352108 | -0.352108471 | 7.554020345  | 2.958515671  | 5.256268008  |
| 101927824 | -0.352108471 | -0.352108 | -0.352108471 | 4.08236011   | 7.38205614   | 0.782664081  |
| 101927837 | -0.352108471 | -0.352108 | -0.352108471 | 2.770666903  | 5.893442277  | -0.352108471 |
| 101927841 | 5.852937462  | 6.0671629 | 5.638712004  | -0.352108471 | -0.352108471 | -0.352108471 |
| 101927877 | 1.904923171  | 3.2722797 | 2.588601447  | 0.228373553  | 0.808855576  | -0.352108471 |
| 101927881 | 8.430581625  | 8.4455387 | 8.415624566  | 1.631676003  | 3.615460478  | -0.352108471 |
| 101927884 | 5.877498426  | 7.3947613 | 8.912024117  | 6.709520631  | 5.708761154  | 7.710280107  |
| 101927889 | -0.352108471 | -0.352108 | -0.352108471 | 2.481575183  | 5.315258837  | -0.352108471 |

|           |              |           |              |              |              |              |
|-----------|--------------|-----------|--------------|--------------|--------------|--------------|
| 101927896 | 4.107432644  | 5.3211461 | 6.534859572  | 2.209286191  | 1.049448818  | 3.369123563  |
| 101927901 | 4.757610744  | 6.8526205 | 2.662600944  | 2.342793532  | 4.245214285  | 0.440372779  |
| 101927902 | 5.529311366  | 4.8148641 | 6.243758652  | -0.352108471 | -0.352108471 | -0.352108471 |
| 101927911 | -0.352108471 | -0.352108 | -0.352108471 | 1.783698732  | -0.352108471 | 3.919505936  |
| 101927914 | 5.089412202  | 6.5161245 | 3.662699872  | -0.352108471 | -0.352108471 | -0.352108471 |
| 101927915 | -0.352108471 | -0.352108 | -0.352108471 | 1.997577452  | 1.44635305   | 2.548801854  |
| 101927924 | 4.215160124  | 7.0148176 | 1.415502606  | 5.048433266  | 8.532601271  | 1.564265262  |
| 101927944 | 6.001725177  | 7.816155  | 4.18729534   | 5.468276192  | 4.075630311  | 6.860922073  |
| 101927952 | 4.404049874  | 5.3546856 | 6.305321424  | -0.352108471 | -0.352108471 | -0.352108471 |
| 101927954 | 6.803513645  | 9.0988796 | 4.508147684  | 4.312962502  | 6.868687233  | 5.590824867  |
| 101927964 | 6.061329067  | 6.8991656 | 7.73700222   | -0.352108471 | -0.352108471 | -0.352108471 |
| 101927973 | 7.049086746  | 4.7049241 | 5.877005427  | 9.442431921  | 5.687745613  | 1.933059306  |
| 101927980 | 2.687757291  | 4.0160458 | 5.344334251  | 6.380291785  | 5.704335255  | 5.028378725  |
| 101927994 | 6.177699785  | 6.3755257 | 6.276612754  | 5.82826691   | 3.336476406  | 8.320057414  |
| 101927998 | 5.413210729  | 7.380526  | 6.396868383  | -0.352108471 | -0.352108471 | -0.352108471 |
| 101928002 | -0.352108471 | -0.352108 | -0.352108471 | 5.369332089  | 5.383503645  | 5.355160532  |
| 101928004 | 5.548815533  | 5.692967  | 5.620891261  | 4.09347548   | 5.673482525  | 7.25348957   |
| 101928020 | 0.783465188  | 3.7077348 | 2.245600013  | 1.946552907  | 3.54819548   | 0.344910334  |
| 101928026 | 5.428393874  | 5.4582551 | 5.398532684  | -0.352108471 | -0.352108471 | -0.352108471 |
| 101928033 | 5.976439646  | 2.4538806 | 4.215160124  | 0.044132154  | 0.440372779  | -0.352108471 |
| 101928045 | -0.352108471 | -0.352108 | -0.352108471 | 5.075427365  | 7.396414957  | 6.235921161  |
| 101928053 | 4.842468271  | 5.5957787 | 5.219123492  | -0.352108471 | -0.352108471 | -0.352108471 |
| 101928068 | 5.698464481  | 5.4498875 | 5.201310554  | 3.482176795  | 4.153941194  | 3.818058994  |
| 101928069 | 3.555243815  | 5.3121178 | 4.433680789  | -0.352108471 | -0.352108471 | -0.352108471 |
| 101928079 | 9.376792143  | 7.8957769 | 6.414761735  | 6.43602752   | 8.120827043  | 4.751227997  |
| 101928081 | 9.60662593   | 3.8608111 | 6.733718494  | 6.102475591  | 5.300187985  | 4.497900379  |
| 101928099 | 8.061120123  | 6.6395097 | 7.35031491   | 3.751349834  | 2.147539136  | 5.355160532  |
| 101928101 | 5.444754735  | 5.0677813 | 5.256268008  | 2.61236831   | 1.305230684  | 3.919505936  |
| 101928103 | 7.496618137  | 4.77306   | 10.22017626  | 6.710150397  | 6.913091351  | 6.811620874  |
| 101928104 | 6.846957097  | 4.2158087 | 9.478105461  | 4.963223552  | 5.72472801   | 6.486232468  |
| 101928113 | 3.486766     | 4.2597237 | 5.032681328  | -0.352108471 | -0.352108471 | -0.352108471 |
| 101928118 | 9.812832381  | 9.8716874 | 9.753977346  | 9.340245741  | 9.11942662   | 8.898607499  |
| 101928120 | -0.352108471 | -0.352108 | -0.352108471 | 4.950307598  | 6.089864204  | 7.229420811  |
| 101928123 | 3.744544946  | 6.1494694 | 4.947007189  | -0.352108471 | -0.352108471 | -0.352108471 |
| 101928131 | 2.803125457  | 5.9583594 | -0.352108471 | 1.540978788  | 1.14221151   | 1.939746065  |
| 101928137 | 9.712905877  | 9.8306575 | 9.771781667  | 7.933420402  | 7.837847273  | 7.885633837  |
| 101928144 | 5.810306839  | 7.5460452 | 9.28178347   | 7.330596441  | 5.599098969  | 3.867601498  |
| 101928150 | 7.566164052  | 7.5166011 | 7.467038146  | 5.091220567  | 7.926103816  | 2.256337317  |
| 101928151 | 7.288433404  | 6.684971  | 6.986702195  | 7.360533746  | 5.945032052  | 6.652782899  |
| 101928158 | 0.388235613  | 2.4815752 | 4.574914752  | -0.352108471 | -0.352108471 | -0.352108471 |
| 101928169 | -0.352108471 | -0.352108 | -0.352108471 | 2.501526031  | 3.182714307  | 1.820337755  |
| 101928174 | 6.735151691  | 2.4194539 | 4.577302775  | 5.687600059  | 6.711928096  | 4.663272021  |
| 101928176 | -0.352108471 | -0.352108 | -0.352108471 | 2.670502348  | -0.352108471 | 5.693113166  |
| 101928189 | 5.656120661  | 4.0177946 | 4.836957653  | 6.295633508  | 5.271165901  | 7.320101116  |
| 101928201 | -0.352108471 | -0.352108 | -0.352108471 | 5.67093521   | 6.149337851  | 6.627740491  |
| 101928202 | -0.352108471 | -0.352108 | -0.352108471 | 5.958359385  | 5.958359385  | 5.958359385  |
| 101928228 | 5.372241581  | 4.4826926 | 6.261790604  | 5.511864271  | 5.494417177  | 5.529311366  |



|           |              |           |              |              |              |              |
|-----------|--------------|-----------|--------------|--------------|--------------|--------------|
| 101928231 | 1.383520155  | 0.2535657 | 2.513474608  | 3.883156074  | 6.190193949  | 1.576118198  |
| 101928241 | 5.376563746  | 7.96909   | 2.784037471  | 0.808855576  | 0.808855576  | 0.808855576  |
| 101928254 | 3.902204188  | 4.1125856 | 3.69182277   | 5.819619791  | 5.191222747  | 6.448016836  |
| 101928255 | 8.116007685  | 5.8188936 | 6.967450619  | 4.449748927  | 4.102036274  | 4.79746158   |
| 101928295 | 5.852491963  | 2.3149862 | 9.389997758  | 2.868155262  | 2.518741013  | 3.217569511  |
| 101928303 | 6.50351982   | 5.2529092 | 4.002298608  | 5.523239719  | 6.172398222  | 4.874081216  |
| 101928309 | 3.945254192  | 3.136327  | 4.754181416  | 0.228373553  | -0.352108471 | 0.808855576  |
| 101928318 | 6.537383725  | 5.6396255 | 7.435141923  | 4.883715006  | 9.764015434  | 7.32386522   |
| 101928331 | -0.352108471 | -0.352108 | -0.352108471 | 5.923493182  | 8.01270237   | 3.834283995  |
| 101928336 | 10.30683545  | 8.14045   | 5.97406461   | 6.828129341  | 7.681857993  | 5.974400688  |
| 101928344 | 6.991795048  | 8.3031412 | 5.680448889  | -0.352108471 | -0.352108471 | -0.352108471 |
| 101928368 | -0.352108471 | -0.352108 | -0.352108471 | 3.119148782  | 3.348032409  | 2.890265154  |
| 101928372 | 5.196577314  | 5.4960088 | 4.897145843  | 8.559174957  | 6.382707331  | 4.206239706  |
| 101928381 | 5.111021431  | 4.28869   | 4.699855738  | 0.044132154  | -0.352108471 | 0.440372779  |
| 101928391 | 6.104835944  | 5.193245  | 5.649040476  | 0.044132154  | 0.440372779  | -0.352108471 |
| 101928401 | 7.623288714  | 9.5714111 | 5.67516629   | 5.780173853  | 6.223773372  | 6.66737289   |
| 101928423 | 4.249261192  | 2.6341643 | 5.864358109  | 1.744484008  | 2.051108653  | 1.437859363  |
| 101928435 | -0.352108471 | -0.352108 | -0.352108471 | 4.456886199  | 5.592695754  | 3.321076645  |
| 101928440 | 5.59960682   | 5.6803006 | 5.518913025  | -0.352108471 | -0.352108471 | -0.352108471 |
| 101928446 | 4.543008221  | 5.5936428 | 6.644277383  | 0.782103376  | 1.478197356  | 2.174291337  |
| 101928453 | 6.235994735  | 3.5213362 | 4.878665478  | -0.352108471 | -0.352108471 | -0.352108471 |
| 101928483 | 5.743835375  | 5.5293114 | 5.958359385  | -0.352108471 | -0.352108471 | -0.352108471 |
| 101928495 | 2.560163873  | 2.7115616 | 2.862959239  | 0.044132154  | -0.352108471 | 0.440372779  |
| 101928496 | 6.263611604  | 7.6163863 | 4.910836907  | 0.986043316  | 7.694323943  | 4.340183629  |
| 101928514 | 10.12910836  | 9.0782351 | 8.027361906  | 7.983005582  | 8.018349163  | 7.947662002  |
| 101928525 | 2.711464377  | 5.1146406 | 7.517816919  | -0.352108471 | -0.352108471 | -0.352108471 |
| 101928526 | 5.835210261  | 6.1131757 | 5.557244839  | 6.977708203  | 7.919034787  | 6.036381618  |
| 101928527 | 4.113141693  | 6.7474099 | 5.430275811  | 7.859486648  | 5.511044393  | 6.685265521  |
| 101928545 | -0.352108471 | -0.352108 | -0.352108471 | 5.88700099   | 5.089621259  | 6.68438072   |
| 101928550 | 6.844298182  | 9.2277515 | 4.460844902  | 8.059855992  | 7.400550537  | 6.741245083  |
| 101928555 | 4.821115482  | 7.0783904 | 5.949752937  | 6.856794704  | 0.24275261   | 3.549773657  |
| 101928565 | 7.12950969   | 8.0787243 | 6.180295037  | 6.088371026  | 7.957752778  | 4.218989274  |
| 101928567 | 4.07445589   | 5.7536871 | 4.914071475  | 5.64753996   | 5.460434222  | 5.273328484  |
| 101928574 | 6.780548039  | 3.2359077 | 5.008227864  | 1.842407068  | 1.876861374  | 1.807952763  |
| 101928578 | 4.433680789  | 3.6761388 | 5.191222747  | 0.044132154  | -0.352108471 | 0.440372779  |
| 101928580 | 4.156475292  | 4.2452143 | 4.333953278  | 1.979475812  | 2.011378906  | 1.995427359  |
| 101928583 | 7.037798976  | 8.3124918 | 5.763106103  | 0.044132154  | -0.352108471 | 0.440372779  |
| 101928597 | 5.586919941  | 4.9799919 | 6.193847962  | 1.591046029  | 1.305230684  | 1.876861374  |
| 101928600 | 10.25478152  | 11.54303  | 8.966533538  | 9.326288657  | 9.845835113  | 8.8067422    |
| 101928625 | 1.392109249  | 2.3571814 | 0.42703708   | 2.124237496  | 3.703340207  | 0.545134784  |
| 101928632 | 7.561981411  | 5.4582551 | 3.354528717  | -0.352108471 | -0.352108471 | -0.352108471 |
| 101928669 | 6.020327111  | 6.055636  | 6.03798158   | 5.903760504  | 8.494417256  | 3.313103753  |
| 101928684 | 8.747825592  | 6.8454429 | 7.796634271  | 5.203968979  | 6.905740203  | 8.607511426  |
| 101928694 | 4.297639083  | 6.9925329 | 1.602745308  | 5.855547981  | 6.232107317  | 5.478988644  |
| 101928704 | 2.44582553   | 1.5597239 | 3.331927181  | -0.352108471 | -0.352108471 | -0.352108471 |
| 101928710 | 4.141031582  | 8.4658909 | 6.303461245  | -0.352108471 | -0.352108471 | -0.352108471 |
| 101928716 | 7.452723153  | 7.352529  | 7.552917276  | 5.141833898  | 4.245214285  | 6.038453511  |

|           |              |           |              |              |              |              |
|-----------|--------------|-----------|--------------|--------------|--------------|--------------|
| 101928720 | 7.946182748  | 4.7461416 | 6.346162167  | -0.352108471 | -0.352108471 | -0.352108471 |
| 101928725 | 5.544862015  | 2.3456464 | 3.945254192  | 1.668505151  | 3.03366733   | 2.351086241  |
| 101928726 | 6.517963851  | 6.531646  | 6.504281698  | 0.727922146  | 1.807952763  | -0.352108471 |
| 101928733 | 1.392109249  | 2.8925343 | -0.108315788 | 2.887607814  | 3.11247051   | 3.000039162  |
| 101928738 | 5.110010598  | 4.7518672 | 5.468153966  | 0.805486251  | 1.769397609  | 2.733308968  |
| 101928752 | 5.657493881  | 5.6532998 | 5.661687951  | -0.352108471 | -0.352108471 | -0.352108471 |
| 101928760 | 4.072205287  | 5.2849744 | 6.497743425  | -0.352108471 | -0.352108471 | -0.352108471 |
| 101928766 | 5.321252663  | 5.5882244 | 5.054280952  | 6.12990004   | 6.135204448  | 6.124595632  |
| 101928786 | 4.864842617  | 6.1215288 | 7.378214921  | 0.812748712  | 2.432228037  | 1.622488375  |
| 101928792 | -0.352108471 | -0.352108 | -0.352108471 | 2.124237496  | 2.147539136  | 2.100935855  |
| 101928794 | 8.459617393  | 4.7551375 | 6.607377459  | -0.352108471 | -0.352108471 | -0.352108471 |
| 101928795 | 6.304886683  | 6.5896867 | 6.874486772  | 1.704340373  | 3.27996028   | 4.855580186  |
| 101928796 | -0.352108471 | -0.352108 | -0.352108471 | 5.017136436  | 5.054280952  | 4.979991919  |
| 101928808 | 7.363560518  | 5.5869199 | 3.810279363  | 3.488784686  | 1.997577452  | 4.979991919  |
| 101928809 | 5.089412202  | 5.1245435 | 5.054280952  | 6.378900911  | 6.532588736  | 6.225213087  |
| 101928818 | -0.352108471 | -0.352108 | -0.352108471 | 5.284974356  | 4.868036798  | 5.701911914  |
| 101928841 | 7.018254481  | 6.7066286 | 7.329880387  | 6.328089748  | 3.446196717  | 9.209982779  |
| 101928844 | 2.483048095  | 1.277429  | 1.880238567  | 3.46613827   | 4.569815273  | 2.362461267  |
| 101928845 | 5.937827329  | 5.873346  | 6.002308672  | 0.440372779  | 0.440372779  | 0.440372779  |
| 101928846 | 8.831681515  | 4.9422224 | 6.886951948  | 4.537270288  | 7.459806893  | 5.99853859   |
| 101928847 | 6.537146105  | 6.8840608 | 6.190231414  | 0.737349958  | 3.721385883  | 2.22936792   |
| 101928848 | 6.005023479  | 5.1125123 | 5.55876787   | -0.352108471 | -0.352108471 | -0.352108471 |
| 101928855 | 3.715642943  | 7.3672599 | 5.541451418  | 1.831534952  | 3.668632064  | 5.505729177  |
| 101928857 | 6.184348037  | 5.6656669 | 5.925007489  | 3.196038955  | 4.954218546  | 1.437859363  |
| 101928868 | 9.209884796  | 4.0047484 | 6.607316614  | 5.420684135  | 4.445477722  | 3.470271309  |
| 101928875 | -0.352108471 | -0.352108 | -0.352108471 | 5.980334028  | 6.904792035  | 5.055876022  |
| 101928876 | -0.352108471 | -0.352108 | -0.352108471 | 6.458036567  | 2.571154353  | -1.315727861 |
| 101928879 | 5.939192221  | 7.1110404 | 4.767344022  | -0.352108471 | -0.352108471 | -0.352108471 |
| 101928885 | 6.090808341  | 6.5188701 | 5.662746571  | -0.352108471 | -0.352108471 | -0.352108471 |
| 101928887 | 8.051116643  | 6.0558619 | 7.053489274  | 5.449524003  | 2.887004166  | 0.324484329  |
| 101928891 | -0.352108471 | -0.352108 | -0.352108471 | 3.475323526  | 6.862992125  | 5.169157826  |
| 101928906 | -0.352108471 | -0.352108 | -0.352108471 | 3.402206991  | 0.06583992   | 6.738574063  |
| 101928933 | 6.40767526   | 5.2788202 | 7.536530271  | 7.661993031  | 6.871609123  | 6.081225215  |
| 101928936 | 11.79921455  | 10.815781 | 9.832348147  | 8.815571768  | 7.728884677  | 9.90225886   |
| 101928946 | 4.834101937  | 2.7058213 | 6.96238253   | 3.563451397  | 2.732871542  | 3.148161469  |
| 101928962 | 4.649747619  | 5.054281  | 4.245214285  | 6.065196634  | 6.355161685  | 5.775231583  |
| 101928969 | 3.530238889  | 5.6641722 | 7.798105474  | -0.352108471 | -0.352108471 | -0.352108471 |
| 101928978 | 2.84317252   | 2.995873  | 2.690472086  | 0.975533543  | 1.14221151   | 0.808855576  |
| 101928992 | 6.22851478   | 5.0087546 | 3.78899432   | 2.913739289  | 3.922118404  | 3.417928847  |
| 101928998 | -0.352108471 | -0.352108 | -0.352108471 | 0.622639271  | 5.978059164  | 3.300349217  |
| 101928999 | 5.112273114  | 7.1110017 | 9.109730209  | -0.352108471 | -0.352108471 | -0.352108471 |
| 101929010 | 6.494190852  | 6.1999612 | 6.788420481  | 3.027377867  | 5.124543452  | 0.930212283  |
| 101929025 | 2.981302042  | 3.5151412 | 4.04898043   | 1.873849414  | 1.807952763  | 1.939746065  |
| 101929057 | 3.601141313  | 6.4889106 | 5.045025943  | 0.791292145  | 1.14221151   | 0.440372779  |
| 101929059 | 7.072509339  | 6.9037827 | 7.241236027  | 6.218511826  | 6.101634422  | 6.33538923   |
| 101929066 | 2.981526684  | 4.5220247 | 6.062522703  | 1.981180367  | 0.808855576  | 3.153505157  |
| 101929083 | 5.493783215  | 5.5293114 | 5.458255064  | -0.352108471 | -0.352108471 | -0.352108471 |

|           |              |           |              |              |              |              |
|-----------|--------------|-----------|--------------|--------------|--------------|--------------|
| 101929086 | 8.076681806  | 8.1193837 | 8.162085602  | 6.072053441  | 6.985674563  | 7.899295684  |
| 101929112 | -0.352108471 | -0.352108 | -0.352108471 | 6.200126558  | 4.456886199  | 2.713645841  |
| 101929123 | -0.352108471 | -0.352108 | -0.352108471 | 6.001809131  | 6.08127149   | 5.922346773  |
| 101929130 | 7.860152705  | 7.3590339 | 7.609593315  | 7.310661511  | 5.574700788  | 3.838740065  |
| 101929144 | 6.395056727  | 5.9414478 | 5.487838919  | 0.791292145  | 0.440372779  | 1.14221151   |
| 101929147 | 7.044455835  | 6.9037827 | 7.18512902   | 0.044132154  | 0.440372779  | -0.352108471 |
| 101929152 | 8.507400971  | 7.4746577 | 6.441914365  | 6.072606262  | 7.006051904  | 7.939497545  |
| 101929153 | 4.421820181  | 5.4283939 | 6.434967567  | -0.352108471 | -0.352108471 | -0.352108471 |
| 101929159 | 1.190868475  | 4.5497284 | 7.908588236  | 0.326055216  | 2.528899575  | 1.427477396  |
| 101929165 | 8.423783094  | 6.648528  | 7.536155555  | 5.256221592  | 7.571823439  | 9.887425286  |
| 101929181 | 6.074755128  | 6.7518845 | 7.429013781  | 1.981180367  | 0.808855576  | 3.153505157  |
| 101929184 | -0.352108471 | -0.352108 | -0.352108471 | 0.874413692  | -0.352108471 | 2.100935855  |
| 101929194 | -0.352108471 | -0.352108 | -0.352108471 | 6.801058014  | 4.486022226  | 5.64354012   |
| 101929199 | 8.186101763  | 7.9701803 | 7.754258871  | 7.406278031  | 11.54073697  | 3.271819091  |
| 101929200 | -0.352108471 | -0.352108 | -0.352108471 | 4.774498542  | 4.482692559  | 5.066304524  |
| 101929206 | -0.352108471 | -0.352108 | -0.352108471 | 0.849500091  | -0.352108471 | 2.051108653  |
| 101929216 | 3.805664353  | 3.4358082 | 4.175520484  | 2.049256654  | 2.100935855  | 1.997577452  |
| 101929224 | 5.91576742   | 5.7770771 | 6.05445777   | 1.58479924   | 1.731739118  | 1.437859363  |
| 101929227 | 6.263974257  | 6.9076731 | 5.620275462  | 4.155185764  | 6.562251917  | 1.748119611  |
| 101929230 | 5.656289537  | 5.9103134 | 5.402265645  | -0.352108471 | -0.352108471 | -0.352108471 |
| 101929259 | 5.804767386  | 7.6044747 | 6.704621053  | 5.658097137  | 8.227591779  | 6.942844458  |
| 101929260 | 5.933381578  | 6.3324667 | 6.731551759  | -0.352108471 | -0.352108471 | -0.352108471 |
| 101929279 | 3.511586554  | 6.6672378 | 5.089412202  | 1.30840417   | 1.807952763  | 0.808855576  |
| 101929295 | 6.666109932  | 6.5150311 | 6.817188811  | 2.179939357  | 0.440372779  | 3.919505936  |
| 101929301 | 3.662141459  | 1.3842828 | 2.523212107  | 3.073227812  | 4.32549163   | 3.699359721  |
| 101929329 | 4.20130528   | 6.6073775 | 9.013449638  | -0.352108471 | -0.352108471 | -0.352108471 |
| 101929333 | 8.363953381  | 10.081332 | 11.79870992  | 9.187054383  | 8.313629059  | 8.750341721  |
| 101929352 | 5.986643059  | 5.0554016 | 6.917884546  | 4.481844932  | 7.337535782  | 1.626154082  |
| 101929372 | 4.618564529  | 3.7280709 | 5.509058121  | 1.80041638   | 2.051108653  | 1.549724107  |
| 101929378 | 4.372191214  | 2.627595  | 6.116787462  | 2.211943219  | 2.232575625  | 2.191310813  |
| 101929380 | 5.226406818  | 5.054281  | 5.398532684  | 2.655229797  | 2.191310813  | 3.119148782  |
| 101929390 | 7.075097789  | 7.848492  | 8.621886177  | 5.544866226  | 6.432145005  | 7.319423784  |
| 101929398 | 5.974855592  | 6.8917819 | 6.433318728  | -0.352108471 | -0.352108471 | -0.352108471 |
| 101929400 | 4.549728355  | 6.2861288 | 2.8133279    | -0.352108471 | -0.352108471 | -0.352108471 |
| 101929402 | 7.077963787  | 6.5644614 | 6.050959007  | 6.571028909  | 6.398570076  | 6.743487742  |
| 101929415 | 9.488445266  | 9.3131537 | 9.663736784  | 8.698996908  | 8.759587648  | 8.638406169  |
| 101929418 | 5.331510862  | 4.4868934 | 3.642276026  | 0.689815323  | -0.352108471 | 1.731739118  |
| 101929425 | 2.588601447  | 2.8524293 | 2.32477359   | -0.352108471 | -0.352108471 | -0.352108471 |
| 101929426 | 7.667941511  | 6.6002756 | 5.532609778  | 4.609641414  | 3.245625856  | 1.881610298  |
| 101929431 | 8.198489481  | 6.4727957 | 9.92418329   | 8.018068611  | 7.023663373  | 7.520865992  |
| 101929439 | 5.0702182    | 6.5301814 | 5.800199788  | -0.352108471 | -0.352108471 | -0.352108471 |
| 101929445 | -0.352108471 | -0.352108 | -0.352108471 | 5.169157826  | 6.60418997   | 3.734125681  |
| 101929450 | 5.967012314  | 6.4772569 | 6.222134608  | 3.308014316  | 1.549724107  | 5.066304524  |
| 101929482 | 3.682035383  | 6.5472459 | 5.114640648  | -0.352108471 | -0.352108471 | -0.352108471 |
| 101929486 | 3.127737875  | 3.136327  | 3.119148782  | 4.288701923  | 5.458255064  | 3.119148782  |
| 101929497 | 0.736119179  | 3.9660533 | 2.351086241  | 0.044132154  | -0.352108471 | 0.440372779  |
| 101929511 | 5.95664934   | 6.5341125 | 7.111575689  | 5.615586825  | 7.054970771  | 6.335278798  |

|           |              |           |              |              |              |              |
|-----------|--------------|-----------|--------------|--------------|--------------|--------------|
| 101929519 | -0.352108471 | -0.352108 | -0.352108471 | 2.221964512  | 2.252618212  | 2.191310813  |
| 101929526 | -0.352108471 | -0.352108 | -0.352108471 | 6.453264303  | 4.73755266   | 3.021841017  |
| 101929528 | 6.369156591  | 7.955428  | 4.782885208  | -0.352108471 | -0.352108471 | -0.352108471 |
| 101929540 | 2.277882245  | 4.5174054 | 3.397643806  | 3.304563757  | 2.681724436  | 2.058885116  |
| 101929542 | 7.204955222  | 4.3455079 | 5.775231583  | -0.352108471 | -0.352108471 | -0.352108471 |
| 101929550 | 5.648033597  | 5.3324918 | 5.490262688  | 2.893883306  | 6.992603391  | 4.943243349  |
| 101929567 | 12.14051218  | 11.177295 | 11.65890366  | 9.078360757  | 10.34897984  | 11.61959892  |
| 101929586 | 6.783937768  | 9.0963346 | 7.940136183  | 5.892315348  | 4.416882669  | 7.367748028  |
| 101929614 | -0.352108471 | -0.352108 | -0.352108471 | 3.919505936  | 3.919505936  | 3.919505936  |
| 101929634 | 7.914178495  | 2.3983766 | 5.156277572  | 3.350303694  | 1.939746065  | 4.760861323  |
| 101929645 | 5.326927409  | 5.1384716 | 5.515383174  | 0.791292145  | 1.14221151   | 0.440372779  |
| 101929660 | 2.668345013  | 5.1227518 | 7.577158686  | 6.181883301  | 7.613507454  | 4.750259147  |
| 101929670 | -0.352108471 | -0.352108 | -0.352108471 | 5.1471442    | 4.175292888  | 3.203441576  |
| 101929680 | 6.538498835  | 7.4209894 | 5.656008285  | 6.661679876  | 6.330059492  | 5.998439109  |
| 101929681 | 6.09184854   | 5.1800301 | 5.635939335  | -0.352108471 | -0.352108471 | -0.352108471 |
| 101929688 | -0.352108471 | -0.352108 | -0.352108471 | 3.756942025  | 4.91770573   | 6.078469436  |
| 101929690 | 6.640019393  | 7.0361566 | 6.243882221  | -0.352108471 | -0.352108471 | -0.352108471 |
| 101929693 | -0.352108471 | -0.352108 | -0.352108471 | 4.66005769   | 5.672236747  | 3.647878632  |
| 101929694 | 4.335919821  | 5.4066305 | 3.265209189  | 2.653997961  | 3.254329098  | 3.854660235  |
| 101929698 | 7.578270771  | 7.9883565 | 7.168185076  | 4.969163726  | 2.361348104  | 7.576979348  |
| 101929713 | 5.386535448  | 5.2437595 | 5.529311366  | 3.878699875  | 1.939746065  | 5.817653684  |
| 101929716 | 6.905153245  | 6.1515856 | 5.398018012  | -0.352108471 | -0.352108471 | -0.352108471 |
| 101929717 | 5.951809919  | 6.3763797 | 5.527240124  | -0.352108471 | -0.352108471 | -0.352108471 |
| 101929754 | 3.098457124  | 3.3920135 | 3.245235305  | 6.697849457  | 5.529311366  | 4.360773274  |
| 101929762 | 6.158865923  | 7.2654723 | 5.052259592  | 2.051108653  | 1.548142771  | 2.554074536  |
| 101929774 | 4.04402614   | 5.9945398 | 5.019282955  | -0.352108471 | -0.352108471 | -0.352108471 |
| 101929796 | 6.89992346   | 6.9268019 | 6.873045007  | 6.580724432  | 6.759061079  | 6.402387785  |
| 101929806 | -0.352108471 | -0.352108 | -0.352108471 | 5.44897977   | 7.587771569  | 3.310187972  |
| 101929814 | 5.664088163  | 6.0023087 | 5.325867653  | -0.352108471 | -0.352108471 | -0.352108471 |
| 101929892 | 5.858161648  | 5.5755178 | 5.292873997  | 1.651404068  | 2.396536258  | 0.906271878  |
| 101929927 | 4.305750079  | 0.7406741 | 2.523212107  | -0.352108471 | -0.352108471 | -0.352108471 |
| 101929941 | 7.485720019  | 6.7206966 | 5.955673123  | 7.120271332  | 5.492661445  | 3.865051557  |
| 101929946 | 5.742285457  | 4.863372  | 5.302828753  | 1.437859363  | -0.024004841 | 2.899723567  |
| 101929959 | 6.020666958  | 6.8312892 | 7.641911457  | -0.352108471 | -0.352108471 | -0.352108471 |
| 101929977 | 3.127737875  | 3.136327  | 3.119148782  | 4.201099247  | 4.482692559  | 3.919505936  |
| 101929988 | -0.352108471 | -0.352108 | -0.352108471 | 4.178899946  | 4.245214285  | 4.112585606  |
| 101929998 | -0.352108471 | -0.352108 | -0.352108471 | 3.725166081  | 3.337746555  | 4.112585606  |
| 101930028 | -0.352108471 | -0.352108 | -0.352108471 | 0.793818797  | 1.939746065  | -0.352108471 |
| 101930031 | 6.903443506  | 6.6708246 | 6.787134073  | -0.352108471 | -0.352108471 | -0.352108471 |
| 101930047 | 1.950932319  | 7.241871  | 4.596401634  | 0.149726728  | 4.129961623  | 2.139844176  |
| 101930059 | 3.495206597  | 6.2621244 | 4.878665478  | -0.352108471 | -0.352108471 | -0.352108471 |
| 101930067 | 6.020381091  | 7.2906614 | 4.750100767  | 0.440372779  | 0.440372779  | 0.440372779  |
| 101930075 | 5.073619131  | 8.8317955 | 6.952707338  | -0.352108471 | -0.352108471 | -0.352108471 |
| 101930085 | 6.230614498  | 7.5626216 | 8.894628665  | 7.760375585  | 6.614103346  | 5.467831107  |
| 101930091 | 5.525038609  | 6.502263  | 7.479487447  | -0.352108471 | -0.352108471 | -0.352108471 |
| 101930117 | 7.326578711  | 7.7375008 | 8.148422839  | 7.237837929  | 6.849035557  | 7.043436743  |
| 101930119 | 7.207838162  | 7.2305473 | 7.18512902   | -0.352108471 | -0.352108471 | -0.352108471 |

|           |              |           |              |              |              |              |
|-----------|--------------|-----------|--------------|--------------|--------------|--------------|
| 101930123 | 5.085607333  | 3.1253464 | 7.045868219  | 4.027343717  | 2.879532747  | 1.731721778  |
| 101930125 | -0.352108471 | -0.352108 | -0.352108471 | 8.531340208  | 5.939192221  | 3.347044235  |
| 101930129 | 4.296089635  | 2.6817244 | 1.067359237  | -0.352108471 | -0.352108471 | -0.352108471 |
| 101930151 | 3.127737875  | 3.136327  | 3.119148782  | 4.439864799  | 5.315258837  | 6.190652875  |
| 101930164 | 8.20435406   | 5.2917962 | 2.379238258  | -0.352108471 | -0.352108471 | -0.352108471 |
| 101930168 | 2.991761457  | 1.9108199 | 2.451290702  | -0.352108471 | -0.352108471 | -0.352108471 |
| 101930452 | -0.352108471 | -0.352108 | -0.352108471 | 0.854670495  | 2.124237496  | 3.393804497  |
| 101978719 | 5.029080614  | 8.4980293 | 6.763554971  | 7.016082108  | 6.543126016  | 6.070169923  |
| 101978785 | 6.526543088  | 7.2579542 | 7.989365282  | 6.785488968  | 4.561476082  | 5.673482525  |
| 102060414 | -0.352108471 | -0.352108 | -0.352108471 | 1.77976078   | 3.119148782  | 0.440372779  |
| 102157401 | -0.352108471 | -0.352108 | -0.352108471 | 1.400698343  | -0.352108471 | 3.153505157  |
| 102157402 | -0.352108471 | -0.352108 | -0.352108471 | 6.804723141  | 7.308739603  | 6.300706679  |
| 102467081 | 6.418225735  | 7.6458482 | 7.032036953  | 5.870213399  | 6.16990339   | 6.469593382  |
| 102578074 | 6.739878825  | 7.0629266 | 6.41683103   | 0.044132154  | -0.352108471 | 0.440372779  |
| 102606463 | 2.718593827  | 3.2452353 | 3.771876783  | 6.474985635  | 2.63489202   | 4.554938827  |
| 102659353 | 4.161342354  | 7.0144707 | 5.587906531  | 1.988898614  | 2.100935855  | 1.876861374  |
| 102723099 | 8.71290153   | 6.4975644 | 7.605232944  | 6.679108481  | 7.564375751  | 7.121742116  |
| 102723166 | 6.149285363  | 3.7077382 | 4.92851177   | 1.190059422  | 0.440372779  | 1.939746065  |
| 102723318 | -0.352108471 | -0.352108 | -0.352108471 | 6.682822443  | 6.471635949  | 6.894008936  |
| 102723338 | -0.352108471 | -0.352108 | -0.352108471 | 3.384482817  | 2.805970333  | 3.962995302  |
| 102723344 | -0.352108471 | -0.352108 | -0.352108471 | 1.873849414  | 1.939746065  | 1.807952763  |
| 102723381 | 6.754635196  | 6.9079432 | 6.831289207  | -0.352108471 | -0.352108471 | -0.352108471 |
| 102723382 | -0.352108471 | -0.352108 | -0.352108471 | 4.950122184  | 3.919505936  | 2.888889687  |
| 102723393 | 7.245527112  | 7.1770317 | 7.108536371  | 2.5476814    | 1.046196536  | 1.796938968  |
| 102723395 | -0.352108471 | -0.352108 | -0.352108471 | 7.050486941  | 5.596916991  | 4.143347041  |
| 102723412 | -0.352108471 | -0.352108 | -0.352108471 | 4.292853281  | 6.569835415  | 8.846817549  |
| 102723423 | 5.876276997  | 5.9200251 | 5.832528937  | 3.80092067   | 4.482692559  | 3.119148782  |
| 102723426 | 3.280386814  | 4.2393435 | 5.198300279  | -0.352108471 | -0.352108471 | -0.352108471 |
| 102723442 | 4.947007189  | 1.0914165 | 8.802597845  | -0.352108471 | -0.352108471 | -0.352108471 |
| 102723446 | 3.279414369  | 3.5279165 | 3.776418535  | 6.378374162  | 6.935614535  | 5.821133789  |
| 102723449 | 6.836731419  | 7.6083864 | 8.38004137   | 5.380773408  | 7.996908999  | 6.688841204  |
| 102723490 | 4.503064341  | -0.18326  | 2.15990226   | 4.872800634  | 6.846434104  | 5.859617369  |
| 102723506 | 5.173677083  | 2.7976612 | 7.549692921  | 4.996759282  | -1.001604379 | 1.997577452  |
| 102723508 | 6.009358019  | 6.7354978 | 7.461637667  | 7.381481781  | 8.784840195  | 5.978123368  |
| 102723510 | 5.185586761  | 5.1799508 | 5.191222747  | -0.352108471 | -0.352108471 | -0.352108471 |
| 102723521 | 7.798666424  | 6.8453896 | 5.892112784  | 5.774127426  | 3.625085775  | 7.923169078  |
| 102723529 | -0.352108471 | -0.352108 | -0.352108471 | 2.810398723  | 1.438076269  | 2.124237496  |
| 102723543 | 5.26355452   | 6.1515856 | 7.039616737  | -0.352108471 | -0.352108471 | -0.352108471 |
| 102723546 | 4.579618372  | 4.2452143 | 4.914022459  | 1.744484008  | 1.437859363  | 2.051108653  |
| 102723548 | -0.352108471 | -0.352108 | -0.352108471 | 0.940233577  | 2.232575625  | -0.352108471 |
| 102723549 | 6.537383725  | 6.8492425 | 6.225524967  | -0.352108471 | -0.352108471 | -0.352108471 |
| 102723564 | 4.550307802  | 2.6980379 | 6.402577662  | 3.027377867  | 5.124543452  | 0.930212283  |
| 102723567 | 5.016270388  | 5.8529375 | 6.689604536  | -0.352108471 | -0.352108471 | -0.352108471 |
| 102723578 | -0.352108471 | -0.352108 | -0.352108471 | 3.73520442   | 5.017136436  | 6.299068451  |
| 102723582 | 4.335320611  | 5.4731418 | 4.904231184  | -0.352108471 | -0.352108471 | -0.352108471 |
| 102723597 | 5.683431529  | 6.8018138 | 7.920196019  | -0.352108471 | -0.352108471 | -0.352108471 |
| 102723603 | 11.11699173  | 6.7032984 | 8.910145059  | 7.345603024  | 7.821824499  | 8.298045973  |

|           |              |           |              |              |              |              |
|-----------|--------------|-----------|--------------|--------------|--------------|--------------|
| 102723623 | 5.110693474  | 6.2615598 | 5.686126657  | 3.916963084  | 1.210357624  | 6.623568543  |
| 102723656 | 5.931811387  | 5.7347435 | 5.537675535  | 1.345967809  | 1.14221151   | 1.549724107  |
| 102723678 | 4.677204034  | 7.5923972 | 6.134800615  | -0.352108471 | -0.352108471 | -0.352108471 |
| 102723708 | -0.352108471 | -0.352108 | -0.352108471 | 5.760537073  | 6.040166126  | 5.48090802   |
| 102723709 | -0.352108471 | -0.352108 | -0.352108471 | 3.3765591    | 3.394991108  | 3.358127092  |
| 102723739 | 5.824288785  | 5.873346  | 5.775231583  | -0.352108471 | -0.352108471 | -0.352108471 |
| 102723743 | -0.352108471 | -0.352108 | -0.352108471 | 1.946552907  | 4.245214285  | -0.352108471 |
| 102723750 | 7.43264761   | 7.1363903 | 7.728904916  | 2.745079935  | 6.139361673  | 9.533643411  |
| 102723769 | 6.66237111   | 6.8118473 | 6.512894899  | 6.099125059  | 6.345148158  | 5.853101961  |
| 102723780 | 4.772909641  | 4.9140225 | 4.631796822  | -0.352108471 | -0.352108471 | -0.352108471 |
| 102723794 | -0.352108471 | -0.352108 | -0.352108471 | 6.740064213  | 5.435224696  | 6.087644454  |
| 102723795 | 7.714431553  | 5.5926231 | 3.470814553  | -0.352108471 | -0.352108471 | -0.352108471 |
| 102723802 | -0.352108471 | -0.352108 | -0.352108471 | 5.095423988  | 5.124543452  | 5.066304524  |
| 102723832 | 4.792303669  | 4.8304259 | 4.754181416  | -0.352108471 | -0.352108471 | -0.352108471 |
| 102723847 | -0.352108471 | -0.352108 | -0.352108471 | 6.710896273  | 5.881191458  | 6.296043865  |
| 102723897 | -0.352108471 | -0.352108 | -0.352108471 | 2.763418119  | 3.727833592  | 3.245625856  |
| 102723908 | 4.01645024   | 4.9470072 | 5.877564138  | 6.540502679  | 8.397076465  | 4.683928894  |
| 102723912 | 6.505122864  | 6.7549619 | 7.004801016  | -0.352108471 | -0.352108471 | -0.352108471 |
| 102723968 | 4.117696434  | 3.51541   | 4.719982836  | 2.501526031  | 2.809020727  | 2.194031335  |
| 102723981 | 5.493783215  | 3.9239422 | 7.063624187  | -0.352108471 | -0.352108471 | -0.352108471 |
| 102724023 | -0.352108471 | -0.352108 | -0.352108471 | 9.7643434    | 2.707498922  | 6.235921161  |
| 102724030 | 6.689537938  | 7.0781647 | 6.300911206  | 4.65132759   | 5.775320426  | 5.213324008  |
| 102724036 | -0.352108471 | -0.352108 | -0.352108471 | 1.167362396  | 2.686833264  | -0.352108471 |
| 102724046 | -0.352108471 | -0.352108 | -0.352108471 | 7.293225942  | 6.450302837  | 5.607379733  |
| 102724081 | 5.55876787   | 5.6506315 | 5.466904248  | -0.352108471 | -0.352108471 | -0.352108471 |
| 102724094 | -0.352108471 | -0.352108 | -0.352108471 | 4.265501071  | 0.785932822  | 2.525716947  |
| 102724148 | 4.843038887  | 5.054281  | 4.631796822  | -0.352108471 | -0.352108471 | -0.352108471 |
| 102724190 | -0.352108471 | -0.352108 | -0.352108471 | 2.024343053  | 1.689662294  | 2.359023812  |
| 102724211 | 6.253538778  | 3.8511786 | 8.655899005  | 1.569894481  | 1.997577452  | 1.14221151   |
| 102724220 | -0.352108471 | -0.352108 | -0.352108471 | 2.02034096   | 2.100935855  | 1.939746065  |
| 102724225 | -0.352108471 | -0.352108 | -0.352108471 | 3.722730865  | 6.46811711   | 5.095423988  |
| 102724229 | -0.352108471 | -0.352108 | -0.352108471 | 6.640800069  | 5.810136601  | 6.225468335  |
| 102724235 | 2.681724436  | 0.8066625 | 4.556786355  | -0.352108471 | -0.352108471 | -0.352108471 |
| 102724250 | 6.502263028  | 6.5668081 | 6.437717923  | -0.352108471 | -0.352108471 | -0.352108471 |
| 102724252 | 4.895653759  | 8.452604  | 6.674128879  | 0.228373553  | 0.808855576  | -0.352108471 |
| 102724273 | -0.352108471 | -0.352108 | -0.352108471 | 5.637296679  | 3.692628542  | 7.581964815  |
| 102724292 | -0.352108471 | -0.352108 | -0.352108471 | 6.246160577  | 6.215464554  | 6.276856601  |
| 102724339 | -0.352108471 | -0.352108 | -0.352108471 | 6.039651413  | 9.610460608  | 2.468842218  |
| 102724344 | 6.77374078   | 6.7884205 | 6.759061079  | -0.352108471 | -0.352108471 | -0.352108471 |
| 102724363 | 7.068980452  | 7.2865734 | 7.17777694   | -0.352108471 | -0.352108471 | -0.352108471 |
| 102724380 | -0.352108471 | -0.352108 | -0.352108471 | 4.313211605  | 3.085507837  | 3.699359721  |
| 102724423 | -0.352108471 | -0.352108 | -0.352108471 | 0.874413692  | -0.352108471 | 2.100935855  |
| 102724444 | -0.352108471 | -0.352108 | -0.352108471 | 5.712263427  | 8.280447609  | 3.144079246  |
| 102724455 | 6.888648371  | 6.0908083 | 5.29296831   | 0.808855576  | 0.808855576  | 0.808855576  |
| 102724457 | -0.352108471 | -0.352108 | -0.352108471 | 5.095423988  | 5.124543452  | 5.066304524  |
| 102724475 | -0.352108471 | -0.352108 | -0.352108471 | 3.77417806   | 3.585121301  | 3.396064542  |
| 102724488 | 3.127737875  | 3.136327  | 3.119148782  | 6.165870606  | 6.174080069  | 6.157661143  |



|           |              |           |              |              |              |              |
|-----------|--------------|-----------|--------------|--------------|--------------|--------------|
| 102724507 | -0.352108471 | -0.352108 | -0.352108471 | 6.266367194  | 6.276856601  | 6.255877787  |
| 102724532 | 6.541696368  | 5.8379872 | 5.134278016  | 8.30117402   | 5.205647422  | 6.753410721  |
| 102724594 | 5.77115932   | 7.9196199 | 6.845389604  | -0.352108471 | -0.352108471 | -0.352108471 |
| 102724621 | 7.278768713  | 7.7991004 | 6.758436988  | -0.352108471 | -0.352108471 | -0.352108471 |
| 102724634 | 5.152247113  | 5.7003494 | 4.604144794  | -0.352108471 | -0.352108471 | -0.352108471 |
| 102724637 | 6.221877384  | 5.0931104 | 5.657493881  | 0.849500091  | 2.051108653  | -0.352108471 |
| 102724646 | -0.352108471 | -0.352108 | -0.352108471 | 5.204720742  | 2.508581108  | 7.900860376  |
| 102724657 | 2.803125457  | 5.9583594 | -0.352108471 | -0.352108471 | -0.352108471 | -0.352108471 |
| 102724659 | 5.249747311  | 6.3273021 | 5.78852472   | 1.852386493  | 0.63909494   | 1.245740716  |
| 102724668 | 8.502557848  | 5.4860477 | 6.994302779  | -0.352108471 | -0.352108471 | -0.352108471 |
| 102724676 | 7.831268604  | 5.2736756 | 6.552472077  | 1.928436693  | 3.724381058  | 2.826408875  |
| 102724689 | 5.609572595  | 3.1036821 | 0.597791666  | -0.352108471 | -0.352108471 | -0.352108471 |
| 102724699 | 10.62495013  | 10.906804 | 10.34309655  | 9.518627019  | 7.881578866  | 11.15567517  |
| 102724711 | 1.378672347  | 1.3835202 | 1.388367963  | 4.739675848  | 5.183235465  | 5.626795082  |
| 102724734 | -0.352108471 | -0.352108 | -0.352108471 | 4.977710418  | 5.054280952  | 4.901139884  |
| 102724738 | 7.307826811  | 6.6235409 | 5.939255055  | 2.169424975  | 2.191310813  | 2.147539136  |
| 102724858 | 3.931850748  | 0.5464667 | 2.239158726  | -0.352108471 | -0.352108471 | -0.352108471 |
| 102724859 | -0.352108471 | -0.352108 | -0.352108471 | 4.08236011   | 4.245214285  | 3.919505936  |
| 102724872 | -0.352108471 | -0.352108 | -0.352108471 | 7.007692314  | 6.305519736  | 5.603347158  |
| 102724877 | 6.238827807  | 6.4994854 | 6.369156591  | -0.352108471 | -0.352108471 | -0.352108471 |
| 102724904 | 7.325892999  | 5.7743703 | 4.222847639  | -0.352108471 | -0.352108471 | -0.352108471 |
| 102724927 | 7.739518189  | 7.1946085 | 6.649698759  | 3.844270002  | 5.118703215  | 6.393136428  |
| 102724938 | 5.831998311  | 6.0023087 | 5.661687951  | -0.352108471 | -0.352108471 | -0.352108471 |
| 102724950 | -0.352108471 | -0.352108 | -0.352108471 | 4.569567949  | 5.37748771   | 4.97352783   |
| 102724968 | -0.352108471 | -0.352108 | -0.352108471 | 4.110067659  | 5.88700099   | 7.66393432   |
| 102724983 | 4.550307802  | 4.617923  | 4.482692559  | 6.131855599  | 6.383151496  | 5.880559702  |
| 102724984 | 3.340221245  | 6.2443861 | 4.792303669  | -0.352108471 | -0.352108471 | -0.352108471 |
| 102724985 | 3.805664353  | 3.9195059 | 3.69182277   | 5.704335255  | 5.715557343  | 5.693113166  |
| 102725013 | 5.65589851   | 5.8319126 | 5.479884449  | 0.843352133  | 4.530314394  | 2.686833264  |
| 102725019 | -0.352108471 | -0.352108 | -0.352108471 | 4.573795337  | 5.112282437  | 4.843038887  |
| 102725068 | 4.508443336  | 4.5740709 | 4.442815789  | 2.841536824  | 4.245214285  | 1.437859363  |
| 102725086 | 5.421457125  | 4.2150349 | 6.627879354  | 0.791292145  | 1.14221151   | 0.440372779  |
| 102725126 | 7.530950267  | 3.7840375 | 5.657493881  | 0.598807818  | 1.549724107  | -0.352108471 |
| 102725186 | 4.918756329  | 9.2417413 | 7.080248828  | 8.07981804   | 7.149914465  | 7.614866253  |
| 102725195 | -0.352108471 | -0.352108 | -0.352108471 | 2.076022254  | 2.100935855  | 2.051108653  |
| 102725210 | 6.533789593  | 5.1720853 | 5.852937462  | 1.245740716  | 2.051108653  | 0.440372779  |
| 102725247 | -0.352108471 | -0.352108 | -0.352108471 | 4.73755266   | 3.712735384  | 5.762369936  |
| 102725509 | 2.065292044  | -0.352108 | 4.482692559  | 2.313941724  | -0.352108471 | 4.979991919  |
| 102800447 | -0.352108471 | -0.352108 | -0.352108471 | 1.946552907  | 4.245214285  | -0.352108471 |
| 103021294 | 6.661997756  | 6.3425283 | 6.502263028  | -0.352108471 | -0.352108471 | -0.352108471 |
| 103106903 | 4.312701608  | 5.3910182 | 6.469334721  | -0.352108471 | -0.352108471 | -0.352108471 |
| 103157000 | 5.105598647  | 5.1452963 | 5.065900975  | 3.793986574  | 0.800422977  | 6.78755017   |
| 103344929 | 4.617567339  | 6.4681519 | 8.318736396  | 0.044132154  | 0.440372779  | -0.352108471 |
| 103344931 | 6.888173949  | 6.9567177 | 7.025261518  | 6.537165199  | 6.184463472  | 6.889866926  |
| 103352539 | 4.105225259  | 3.9268663 | 4.016045771  | 3.298817978  | 3.342978832  | 3.387139686  |
| 103352670 | 6.903030097  | 6.1401472 | 6.521588638  | 7.585865076  | 3.91931171   | 5.752588393  |
| 103611081 | 5.625160771  | 5.0798157 | 6.170505845  | -0.352108471 | -0.352108471 | -0.352108471 |

|           |              |           |              |              |              |              |
|-----------|--------------|-----------|--------------|--------------|--------------|--------------|
| 103625681 | 5.04930029   | 5.9308246 | 6.812348884  | 4.666623264  | 1.939715935  | 3.3031696    |
| 103724386 | 4.467791151  | 4.3196312 | 4.615951059  | -0.352108471 | -0.352108471 | -0.352108471 |
| 104054148 | -0.352108471 | -0.352108 | -0.352108471 | 3.585121301  | 4.641495008  | 2.528747594  |
| 104169670 | 1.383520155  | -0.352108 | 3.119148782  | 2.124237496  | 2.147539136  | 2.100935855  |
| 104266956 | 2.667523647  | 4.5870979 | 6.506672164  | -0.352108471 | -0.352108471 | -0.352108471 |
| 104326051 | -0.352108471 | -0.352108 | -0.352108471 | 0.874413692  | 2.100935855  | -0.352108471 |
| 104355147 | 6.089329939  | 6.5468574 | 6.318093681  | 1.631676003  | 3.615460478  | -0.352108471 |
| 104355149 | 6.047360751  | 5.9545903 | 5.861819855  | 1.117721484  | 1.305230684  | 0.930212283  |
| 104355287 | 5.845888183  | 4.453057  | 7.238719402  | 0.228373553  | -0.352108471 | 0.808855576  |
| 104355295 | 4.297639083  | 4.6063879 | 3.98889025   | 2.753338652  | 0.440372779  | 5.066304524  |
| 104472714 | 6.753869352  | 7.9976037 | 9.241338116  | 5.632438617  | 6.802395966  | 4.462481268  |
| 104472716 | 8.194652846  | 10.051336 | 6.337969354  | 4.074835099  | 3.867799132  | 4.281871066  |
| 104472718 | 4.921054744  | 4.9167193 | 4.912383916  | 0.542875446  | -0.352108471 | 1.437859363  |
| 104472848 | 2.132907287  | 4.617923  | -0.352108471 | 6.217258872  | 6.276856601  | 6.157661143  |
| 104502416 | 4.217203809  | 5.3152588 | 3.119148782  | 1.293955958  | 2.147539136  | 0.440372779  |
| 104533120 | -0.352108471 | -0.352108 | -0.352108471 | 3.119890661  | 1.167362396  | -0.785165869 |
| 104548971 | 5.354685649  | 5.2241579 | 5.485213359  | -0.352108471 | -0.352108471 | -0.352108471 |
| 104548972 | 2.016914154  | -0.352108 | 4.385936778  | 6.128988904  | 6.735141444  | 7.341293985  |
| 104644205 | 7.743546215  | 8.5504282 | 6.936664241  | 8.046450095  | 7.493134535  | 6.939818975  |
| 104797538 | 5.393591769  | 7.079259  | 8.764926247  | 2.351086241  | 5.054280952  | -0.352108471 |
| 105221694 | 4.19282617   | 6.0203811 | 7.847936012  | 4.501740506  | 6.819587433  | 2.18389358   |
| 105274304 | -0.352108471 | -0.352108 | -0.352108471 | 5.017136436  | 3.392382825  | 6.641890046  |
| 105369140 | 6.083899313  | 5.7743703 | 5.464841325  | -0.352108471 | -0.352108471 | -0.352108471 |
| 105369152 | 6.606671778  | 6.6538708 | 6.559472732  | -0.352108471 | -0.352108471 | -0.352108471 |
| 105369153 | 5.454020722  | 6.6400194 | 7.826018063  | -0.352108471 | -0.352108471 | -0.352108471 |
| 105369154 | 6.623540933  | 5.8725175 | 7.374564332  | 4.73755266   | 6.290023024  | 3.185082296  |
| 105369164 | 5.526823203  | 4.7479185 | 6.305727907  | 2.111907176  | 7.517878287  | 4.814892732  |
| 105369166 | -0.352108471 | -0.352108 | -0.352108471 | 6.285554459  | 6.31523113   | 6.255877787  |
| 105369171 | 4.615143732  | 6.1675828 | 7.72002194   | 2.463480868  | 7.140688952  | 4.80208491   |
| 105369172 | 6.861057494  | 6.8767254 | 6.845389604  | -0.352108471 | -0.352108471 | -0.352108471 |
| 105369175 | 4.947007189  | 4.9799919 | 4.914022459  | -0.352108471 | -0.352108471 | -0.352108471 |
| 105369189 | -0.352108471 | -0.352108 | -0.352108471 | 3.447208575  | 4.843308497  | 2.051108653  |
| 105369197 | 2.65478974   | -0.759232 | 6.068811703  | 3.851666316  | 3.50082021   | 3.149974105  |
| 105369204 | -0.352108471 | -0.352108 | -0.352108471 | 4.120822635  | 1.510772892  | 2.815797763  |
| 105369210 | -0.352108471 | -0.352108 | -0.352108471 | 2.211943219  | 2.232575625  | 2.191310813  |
| 105369216 | -0.352108471 | -0.352108 | -0.352108471 | 2.788781971  | 5.397214192  | 8.005646412  |
| 105369223 | -0.352108471 | -0.352108 | -0.352108471 | 7.851917613  | 5.983736712  | 4.11555581   |
| 105369243 | 6.95059639   | 3.6190308 | 5.284813592  | -0.352108471 | -0.352108471 | -0.352108471 |
| 105369244 | 5.359437143  | 7.1546555 | 6.257046343  | 1.598101998  | 1.646479888  | 1.549724107  |
| 105369271 | 2.376845906  | 2.5530733 | 2.729300687  | 3.919505936  | 1.164053417  | 6.674958454  |
| 105369276 | 4.510705466  | 5.4937832 | 6.476860964  | 3.189677368  | 5.075519558  | 6.961361749  |
| 105369282 | 4.925514366  | 4.7541814 | 4.582848465  | -0.352108471 | -0.352108471 | -0.352108471 |
| 105369292 | -0.352108471 | -0.352108 | -0.352108471 | 7.495200179  | 6.415928975  | 5.33665777   |
| 105369309 | 5.330618856  | 4.8482055 | 5.089412202  | -0.352108471 | -0.352108471 | -0.352108471 |
| 105369314 | -0.352108471 | -0.352108 | -0.352108471 | 4.186919329  | 2.339377742  | 6.034460915  |
| 105369327 | -0.352108471 | -0.352108 | -0.352108471 | 5.279187466  | 5.663737322  | 6.048287177  |
| 105369328 | -0.352108471 | -0.352108 | -0.352108471 | 4.00368964   | 3.572764679  | 3.141839719  |

|           |              |           |              |              |              |              |
|-----------|--------------|-----------|--------------|--------------|--------------|--------------|
| 105369344 | 6.183964016  | 6.1999612 | 6.167966808  | -0.352108471 | -0.352108471 | -0.352108471 |
| 105369360 | 3.515141236  | 3.6761388 | 3.354143641  | 5.588224375  | 5.588224375  | 5.588224375  |
| 105369361 | 4.869177831  | 5.8001998 | 6.731221744  | -0.352108471 | -0.352108471 | -0.352108471 |
| 105369364 | 3.716216518  | 2.5392592 | 3.127737875  | 0.897715333  | 2.147539136  | -0.352108471 |
| 105369391 | -0.352108471 | -0.352108 | -0.352108471 | 5.369332089  | 5.383503645  | 5.355160532  |
| 105369395 | 5.299765723  | 6.1515856 | 7.003405534  | -0.352108471 | -0.352108471 | -0.352108471 |
| 105369419 | 5.800199788  | 6.6993531 | 4.901046517  | -0.352108471 | -0.352108471 | -0.352108471 |
| 105369428 | -0.352108471 | -0.352108 | -0.352108471 | 7.255774566  | 2.285024916  | 4.770399741  |
| 105369436 | 5.775231583  | 5.7752316 | 5.775231583  | 5.458255064  | 5.458255064  | 5.458255064  |
| 105369455 | 5.688622647  | 3.8706949 | 7.506550388  | -0.352108471 | -0.352108471 | -0.352108471 |
| 105369486 | 5.420879354  | 5.7406872 | 5.101071532  | -0.352108471 | -0.352108471 | -0.352108471 |
| 105369494 | 4.079415695  | 4.7439526 | 3.414878831  | 2.748587067  | 4.688318557  | 0.808855576  |
| 105369495 | 6.823036432  | 6.4570024 | 6.640019393  | -0.352108471 | -0.352108471 | -0.352108471 |
| 105369498 | -0.352108471 | -0.352108 | -0.352108471 | 6.266367194  | 6.276856601  | 6.255877787  |
| 105369516 | -0.352108471 | -0.352108 | -0.352108471 | 6.783009163  | 5.575983727  | 4.36895829   |
| 105369526 | -0.352108471 | -0.352108 | -0.352108471 | 6.211291876  | 2.90810652   | 4.559699198  |
| 105369546 | 4.553444075  | 5.9450387 | 5.249241373  | -0.352108471 | -0.352108471 | -0.352108471 |
| 105369570 | -0.352108471 | -0.352108 | -0.352108471 | 6.113115027  | 6.58346007   | 5.642769984  |
| 105369583 | -0.352108471 | -0.352108 | -0.352108471 | 0.240492277  | 4.183394161  | 2.211943219  |
| 105369589 | 6.513563088  | 6.4002632 | 6.286963372  | -0.352108471 | -0.352108471 | -0.352108471 |
| 105369591 | -0.352108471 | -0.352108 | -0.352108471 | 4.953070076  | 2.686833264  | 0.420596451  |
| 105369605 | 6.369156591  | 5.0202775 | 7.718035661  | -0.352108471 | -0.352108471 | -0.352108471 |
| 105369620 | 6.519673958  | 5.3533517 | 7.685996238  | -0.352108471 | -0.352108471 | -0.352108471 |
| 105369626 | -0.352108471 | -0.352108 | -0.352108471 | 5.23117587   | 5.315258837  | 5.147092904  |
| 105369632 | 8.082395191  | 5.7820025 | 3.481609878  | 1.429982115  | 0.256335003  | 2.603629227  |
| 105369633 | -0.352108471 | -0.352108 | -0.352108471 | 5.712263427  | 5.731413688  | 5.693113166  |
| 105369662 | -0.352108471 | -0.352108 | -0.352108471 | 3.23244152   | 5.681330879  | 4.456886199  |
| 105369671 | -0.352108471 | -0.352108 | -0.352108471 | 6.885805372  | 3.452510279  | 5.169157826  |
| 105369687 | -0.352108471 | -0.352108 | -0.352108471 | 6.369156591  | 5.689149611  | 7.04916357   |
| 105369699 | -0.352108471 | -0.352108 | -0.352108471 | 5.745394463  | 7.795099455  | 3.695689471  |
| 105369703 | 5.20192326   | 5.7815511 | 6.361179011  | 3.973412303  | 6.937874907  | 1.008949699  |
| 105369718 | -0.352108471 | -0.352108 | -0.352108471 | 4.12362865   | 3.615460478  | 4.631796822  |
| 105369727 | 5.876276997  | 5.5727089 | 6.179845051  | -0.352108471 | -0.352108471 | -0.352108471 |
| 105369734 | -0.352108471 | -0.352108 | -0.352108471 | 4.296218215  | 4.204267206  | 4.388169225  |
| 105369746 | 1.650498549  | 2.6817244 | 3.712950323  | 0.762376451  | 1.876861374  | -0.352108471 |
| 105369750 | -0.352108471 | -0.352108 | -0.352108471 | 5.233567424  | 5.254689875  | 5.212444972  |
| 105369765 | 5.906842547  | 5.385765  | 6.427920101  | 3.50103787   | 3.690969633  | 3.311106106  |
| 105369771 | -0.352108471 | -0.352108 | -0.352108471 | 2.605817304  | -0.352108471 | 5.563743079  |
| 105369796 | 1.456851574  | 2.3510862 | 3.245320908  | 0.044132154  | -0.352108471 | 0.440372779  |
| 105369823 | 5.90029238   | 8.0046148 | 3.795969972  | 0.624614178  | 0.440372779  | 0.808855576  |
| 105369862 | -0.352108471 | -0.352108 | -0.352108471 | 6.056053999  | 5.290590346  | 6.821517652  |
| 105369865 | 9.11648662   | 1.4592238 | 5.287855205  | 0.985062086  | 1.873707872  | 2.762353657  |
| 105369879 | 5.498944719  | 6.5527278 | 4.445161664  | 3.570927212  | 3.034828093  | 2.498728974  |
| 105369882 | 8.211514833  | 6.6905929 | 7.451053859  | 0.289051906  | -0.352108471 | 0.930212283  |
| 105369884 | 7.08718283   | 6.4338331 | 7.740532544  | -0.352108471 | -0.352108471 | -0.352108471 |
| 105369899 | -0.352108471 | -0.352108 | -0.352108471 | 1.383520155  | -0.352108471 | 3.119148782  |
| 105369900 | 6.561670144  | 7.2691536 | 7.976637098  | -0.352108471 | -0.352108471 | -0.352108471 |

|           |              |           |              |              |              |              |
|-----------|--------------|-----------|--------------|--------------|--------------|--------------|
| 105369954 | 6.224862874  | 6.2558778 | 6.193847962  | -0.352108471 | -0.352108471 | -0.352108471 |
| 105369963 | 1.946552907  | -0.352108 | 4.245214285  | 2.072558294  | 1.997577452  | 2.147539136  |
| 105369966 | -0.352108471 | -0.352108 | -0.352108471 | 5.233567424  | 5.254689875  | 5.212444972  |
| 105369981 | 7.211492803  | 3.3669907 | 5.28924173   | -0.352108471 | -0.352108471 | -0.352108471 |
| 105370015 | 6.537383725  | 5.9402987 | 7.134468793  | -0.352108471 | -0.352108471 | -0.352108471 |
| 105370033 | 6.573968999  | 6.9811491 | 6.166788899  | -0.352108471 | -0.352108471 | -0.352108471 |
| 105370039 | 5.360782592  | 5.1245435 | 5.597021732  | 3.012289909  | 3.337746555  | 2.686833264  |
| 105370042 | 7.981521756  | 8.8469093 | 7.116134233  | 5.666392586  | 7.795117688  | 6.730755137  |
| 105370097 | 3.945254192  | 3.7021369 | 4.188371499  | 2.739781894  | 1.77365078   | 0.807519665  |
| 105370102 | 5.428393874  | 5.4582551 | 5.398532684  | -0.352108471 | -0.352108471 | -0.352108471 |
| 105370109 | 5.345008441  | 6.8838848 | 6.114446624  | 5.567478026  | 5.366715977  | 5.768240076  |
| 105370110 | 5.900075821  | 3.4966392 | 4.698357509  | -0.352108471 | -0.352108471 | -0.352108471 |
| 105370123 | -0.352108471 | -0.352108 | -0.352108471 | 5.353955426  | 2.43016825   | -0.493618925 |
| 105370141 | -0.352108471 | -0.352108 | -0.352108471 | 6.12990004   | 5.138205193  | 7.121594888  |
| 105370182 | -0.352108471 | -0.352108 | -0.352108471 | 5.547554998  | 1.622687605  | 3.585121301  |
| 105370205 | 1.383520155  | -0.352108 | 3.119148782  | 2.826769934  | -0.352108471 | 6.005648339  |
| 105370218 | -0.352108471 | -0.352108 | -0.352108471 | 2.065292044  | 4.482692559  | -0.352108471 |
| 105370230 | 2.553073296  | 3.819188  | 1.286958599  | -0.352108471 | -0.352108471 | -0.352108471 |
| 105370241 | 5.284974356  | 3.7413293 | 6.828619428  | -0.352108471 | -0.352108471 | -0.352108471 |
| 105370253 | 5.386535448  | 2.687836  | 8.085234854  | 2.685302075  | 1.688802714  | 0.692303353  |
| 105370294 | 5.625160771  | 5.6452218 | 5.605099774  | -0.352108471 | -0.352108471 | -0.352108471 |
| 105370312 | 6.720370627  | 4.8469335 | 8.593807752  | -0.352108471 | -0.352108471 | -0.352108471 |
| 105370324 | 5.284974356  | 5.3152588 | 5.254689875  | -0.352108471 | -0.352108471 | -0.352108471 |
| 105370326 | 5.521606291  | 3.8643719 | 4.692989119  | 8.336642039  | 4.457094726  | 6.396868383  |
| 105370333 | 4.7505581    | 5.3865354 | 6.022512797  | 4.573434619  | -0.59563739  | 1.988898614  |
| 105370360 | 5.354685649  | 5.3835036 | 5.325867653  | -0.352108471 | -0.352108471 | -0.352108471 |
| 105370361 | 3.805664353  | 6.7638559 | 0.847472855  | 5.369332089  | 6.146249101  | 4.592415076  |
| 105370363 | -0.352108471 | -0.352108 | -0.352108471 | 7.527394437  | 5.017136436  | 2.506878434  |
| 105370374 | 5.15068911   | 5.4788907 | 5.314789901  | 7.158526143  | -0.423215372 | 3.367655385  |
| 105370378 | 5.939875572  | 5.3920614 | 4.844247146  | -0.352108471 | -0.352108471 | -0.352108471 |
| 105370380 | -0.352108471 | -0.352108 | -0.352108471 | 5.88700099   | 7.421106124  | 4.352895856  |
| 105370382 | 7.788898454  | 6.1165162 | 6.952707338  | -0.352108471 | -0.352108471 | -0.352108471 |
| 105370389 | 6.44985595   | 5.7494021 | 5.048948278  | 2.766560492  | 5.424788855  | 8.083017217  |
| 105370408 | -0.352108471 | -0.352108 | -0.352108471 | 2.633343959  | 3.119148782  | 2.147539136  |
| 105370409 | -0.352108471 | -0.352108 | -0.352108471 | 5.169157826  | 5.191222747  | 5.147092904  |
| 105370475 | 3.683980801  | 4.6696054 | 2.698356187  | 2.103550565  | 2.673599798  | 3.24364903   |
| 105370546 | 7.122936951  | 4.528176  | 1.933415076  | -0.352108471 | -0.352108471 | -0.352108471 |
| 105370548 | 8.364243563  | 6.5384988 | 4.712754107  | -0.352108471 | -0.352108471 | -0.352108471 |
| 105370554 | 2.534485787  | 2.6224566 | 2.710427473  | -0.352108471 | -0.352108471 | -0.352108471 |
| 105370596 | 5.749402114  | 5.7752316 | 5.723572646  | -0.352108471 | -0.352108471 | -0.352108471 |
| 105370622 | 4.882738629  | 6.0736545 | 3.69182277   | -0.352108471 | -0.352108471 | -0.352108471 |
| 105370624 | 5.126394779  | 5.6251608 | 6.123926763  | -0.352108471 | -0.352108471 | -0.352108471 |
| 105370639 | 4.724330734  | 5.2849744 | 5.845617978  | -0.352108471 | -0.352108471 | -0.352108471 |
| 105370671 | 5.625160771  | 7.1885684 | 4.06175311   | -0.352108471 | -0.352108471 | -0.352108471 |
| 105370676 | -0.352108471 | -0.352108 | -0.352108471 | 3.3942846    | 9.107785088  | 6.251034844  |
| 105370680 | 5.55876787   | 5.5882244 | 5.529311366  | -0.352108471 | -0.352108471 | -0.352108471 |
| 105370687 | 4.038879774  | 2.1183088 | 5.959450749  | 3.448534433  | 2.615011019  | 3.031772726  |

|           |              |           |              |              |              |              |
|-----------|--------------|-----------|--------------|--------------|--------------|--------------|
| 105370697 | 2.681724436  | 0.6027528 | 4.760696067  | -0.352108471 | -0.352108471 | -0.352108471 |
| 105370700 | 6.607377459  | 6.6215439 | 6.593211042  | 2.553073296  | 5.458255064  | -0.352108471 |
| 105370703 | 2.740210233  | -0.352108 | 5.832528937  | -0.352108471 | -0.352108471 | -0.352108471 |
| 105370710 | -0.352108471 | -0.352108 | -0.352108471 | 0.938538833  | 2.139844176  | 3.341149518  |
| 105370712 | -0.352108471 | -0.352108 | -0.352108471 | 3.245625856  | 4.735168769  | 1.756082943  |
| 105370713 | -0.352108471 | -0.352108 | -0.352108471 | 0.874413692  | -0.352108471 | 2.100935855  |
| 105370720 | 2.446540028  | 2.5530733 | 2.659606565  | -0.352108471 | -0.352108471 | -0.352108471 |
| 105370737 | 7.924465353  | 5.8529375 | 3.78140957   | -0.352108471 | -0.352108471 | -0.352108471 |
| 105370748 | 2.486879591  | -0.352108 | 5.325867653  | -0.352108471 | -0.352108471 | -0.352108471 |
| 105370761 | 1.66201518   | 1.2718791 | 2.052151305  | 5.284974356  | 6.196741249  | 4.373207463  |
| 105370767 | 6.084059696  | 5.5587679 | 5.033476045  | -0.352108471 | -0.352108471 | -0.352108471 |
| 105370772 | 5.939192221  | 5.9200251 | 5.958359385  | -0.352108471 | -0.352108471 | -0.352108471 |
| 105370811 | 4.878665478  | 1.513975  | 8.24335596   | -0.352108471 | -0.352108471 | -0.352108471 |
| 105370816 | 6.452765963  | 4.1300326 | 5.291399258  | -0.352108471 | -0.352108471 | -0.352108471 |
| 105370836 | -0.352108471 | -0.352108 | -0.352108471 | 4.410462234  | 5.575983727  | 6.741505219  |
| 105370839 | 5.354685649  | 3.678796  | 7.030575321  | -0.352108471 | -0.352108471 | -0.352108471 |
| 105370847 | 3.416881325  | 5.4283939 | 7.439906423  | -0.352108471 | -0.352108471 | -0.352108471 |
| 105370849 | 3.708209828  | 4.8786655 | 6.049121129  | 9.720359308  | 2.688953208  | 6.204656258  |
| 105370859 | 4.01477596   | 5.7757352 | 7.536694493  | -0.352108471 | -0.352108471 | -0.352108471 |
| 105370872 | 5.152247113  | 6.2366294 | 4.067864783  | 4.927679215  | 3.740631438  | 6.114726992  |
| 105370899 | -0.352108471 | -0.352108 | -0.352108471 | 1.446816307  | 4.178899946  | 6.910983584  |
| 105370900 | -0.352108471 | -0.352108 | -0.352108471 | 2.926285844  | 2.656839111  | 2.387392378  |
| 105370928 | 3.684126867  | 8.5589307 | 6.121528769  | -0.352108471 | -0.352108471 | -0.352108471 |
| 105370938 | 4.923818571  | 8.3592709 | 6.641544748  | -0.352108471 | -0.352108471 | -0.352108471 |
| 105370949 | -0.352108471 | -0.352108 | -0.352108471 | 1.631676003  | 3.615460478  | -0.352108471 |
| 105370951 | 5.543977057  | 6.1079622 | 4.979991919  | -0.352108471 | -0.352108471 | -0.352108471 |
| 105370958 | 6.396868383  | 7.5974815 | 5.196255244  | -0.352108471 | -0.352108471 | -0.352108471 |
| 105371009 | 6.107769369  | 5.6251608 | 5.142552174  | -0.352108471 | -0.352108471 | -0.352108471 |
| 105371011 | -0.352108471 | -0.352108 | -0.352108471 | 7.330612862  | 5.171894159  | 6.251253511  |
| 105371017 | -0.352108471 | -0.352108 | -0.352108471 | 5.052267685  | 5.124543452  | 4.979991919  |
| 105371022 | 6.857691475  | 4.5299463 | 9.185436682  | 4.881364164  | 7.293924745  | 6.087644454  |
| 105371028 | -0.352108471 | -0.352108 | -0.352108471 | 5.760537073  | 4.408741859  | 7.112332286  |
| 105371052 | -0.352108471 | -0.352108 | -0.352108471 | 3.919505936  | 3.919505936  | 3.919505936  |
| 105371060 | 5.714944975  | 5.7483543 | 5.781763599  | 4.851734675  | 4.245214285  | 5.458255064  |
| 105371063 | 3.906200071  | 5.76581   | 7.625419967  | 8.392081185  | 6.493532752  | 4.59498432   |
| 105371096 | -0.352108471 | -0.352108 | -0.352108471 | 3.010220895  | 2.100935855  | 3.919505936  |
| 105371100 | -0.352108471 | -0.352108 | -0.352108471 | 2.47165961   | 1.783698732  | 1.095737855  |
| 105371145 | 5.217491139  | 5.7771751 | 4.657807177  | -0.352108471 | -0.352108471 | -0.352108471 |
| 105371146 | 3.38245853   | 6.3748724 | 4.878665478  | 6.982905827  | 3.207942148  | 5.095423988  |
| 105371156 | 3.255864286  | 2.3943359 | 2.8251001    | -0.352108471 | -0.352108471 | -0.352108471 |
| 105371168 | -0.352108471 | -0.352108 | -0.352108471 | 4.178899946  | 4.245214285  | 4.112585606  |
| 105371192 | 3.805664353  | 2.1763337 | 5.434995008  | 1.744735086  | 1.939746065  | 1.549724107  |
| 105371201 | -0.352108471 | -0.352108 | -0.352108471 | 5.918181819  | 5.169157826  | 4.420133832  |
| 105371220 | 5.656289537  | 5.7155573 | 5.597021732  | 0.044132154  | 0.440372779  | -0.352108471 |
| 105371227 | 5.941596889  | 4.0364862 | 7.846707608  | -0.352108471 | -0.352108471 | -0.352108471 |
| 105371232 | -0.352108471 | -0.352108 | -0.352108471 | 5.679743465  | 5.923493182  | 6.167242899  |
| 105371237 | -0.352108471 | -0.352108 | -0.352108471 | 5.958359385  | 5.958359385  | 5.958359385  |

|           |              |           |              |              |              |              |
|-----------|--------------|-----------|--------------|--------------|--------------|--------------|
| 105371240 | -0.352108471 | -0.352108 | -0.352108471 | 8.786760551  | 3.325347447  | 6.056053999  |
| 105371248 | -0.352108471 | -0.352108 | -0.352108471 | 5.995240547  | 5.017136436  | 4.039032324  |
| 105371267 | 5.800199788  | 5.6817489 | 5.918650679  | -0.352108471 | -0.352108471 | -0.352108471 |
| 105371297 | 7.506390201  | 7.1571706 | 7.331780412  | 7.056595924  | 7.008908203  | 7.032752064  |
| 105371305 | 5.556768734  | 4.7311114 | 3.905454011  | 0.362879868  | 3.677648519  | 2.020264194  |
| 105371320 | 6.480446832  | 5.3495577 | 7.611336002  | 1.509536442  | 1.876861374  | 1.14221151   |
| 105371330 | 5.749130652  | 5.4246336 | 5.586882134  | -0.352108471 | -0.352108471 | -0.352108471 |
| 105371384 | -0.352108471 | -0.352108 | -0.352108471 | 3.919505936  | 4.274024238  | 3.564987633  |
| 105371385 | 2.588601447  | 5.5293114 | -0.352108471 | -0.352108471 | -0.352108471 | -0.352108471 |
| 105371388 | 5.980334028  | 9.008187  | 2.952481073  | -0.352108471 | -0.352108471 | -0.352108471 |
| 105371394 | 6.071788357  | 5.6249562 | 5.178123968  | -0.352108471 | -0.352108471 | -0.352108471 |
| 105371400 | -0.352108471 | -0.352108 | -0.352108471 | 5.013656289  | 5.324659362  | 5.169157826  |
| 105371401 | 3.749085012  | 6.940169  | 5.344627021  | 2.981195473  | 4.105704177  | 3.543449825  |
| 105371414 | -0.352108471 | -0.352108 | -0.352108471 | 5.941434187  | 5.629960393  | 6.252907981  |
| 105371430 | -0.352108471 | -0.352108 | -0.352108471 | 5.851193391  | 5.095423988  | 4.339654585  |
| 105371433 | 2.661898887  | 4.5220247 | 6.382150501  | 0.044132154  | 0.440372779  | -0.352108471 |
| 105371451 | 5.89084209   | 7.7025584 | 4.07912574   | 6.459304058  | 6.00972091   | 6.234512484  |
| 105371455 | -0.352108471 | -0.352108 | -0.352108471 | 2.553073296  | -0.352108471 | 5.458255064  |
| 105371471 | 2.803125457  | 5.9583594 | -0.352108471 | -0.352108471 | -0.352108471 | -0.352108471 |
| 105371473 | 2.588601447  | 5.5293114 | -0.352108471 | 2.630970183  | 3.615460478  | 1.646479888  |
| 105371476 | 5.980334028  | 5.8556276 | 6.105040413  | -0.352108471 | -0.352108471 | -0.352108471 |
| 105371499 | 9.602057506  | 6.3324667 | 3.062875832  | -0.352108471 | -0.352108471 | -0.352108471 |
| 105371510 | 4.095303961  | 5.2861808 | 2.904427076  | -0.352108471 | -0.352108471 | -0.352108471 |
| 105371519 | 6.93466021   | 4.6173824 | 2.300104562  | 3.628626245  | 3.337746555  | 3.919505936  |
| 105371543 | -0.352108471 | -0.352108 | -0.352108471 | 10.10584183  | 2.30347069   | 6.204656258  |
| 105371551 | 3.028785297  | 5.5557774 | 8.082769578  | 5.385284682  | 4.873169338  | 4.361053995  |
| 105371553 | -0.352108471 | -0.352108 | -0.352108471 | 2.039485684  | -0.352108471 | 4.43107984   |
| 105371554 | -0.352108471 | -0.352108 | -0.352108471 | 3.682181533  | 4.245214285  | 3.119148782  |
| 105371556 | -0.352108471 | -0.352108 | -0.352108471 | 6.202626522  | 4.927679215  | 3.652731908  |
| 105371565 | 5.392061359  | 3.7512273 | 7.032895429  | -0.352108471 | -0.352108471 | -0.352108471 |
| 105371566 | -0.352108471 | -0.352108 | -0.352108471 | 5.704335255  | 5.352550662  | 6.056119848  |
| 105371571 | -0.352108471 | -0.352108 | -0.352108471 | 2.200078674  | 2.798770262  | 1.601387086  |
| 105371575 | 2.711561556  | 5.0747636 | 0.348359519  | 4.287786813  | 7.893491169  | 6.090638991  |
| 105371586 | 6.509913372  | 7.9438486 | 5.075978185  | 1.3309757    | 1.731739118  | 0.930212283  |
| 105371589 | 9.403855162  | 6.9675112 | 4.531167328  | -0.352108471 | -0.352108471 | -0.352108471 |
| 105371595 | 4.867086667  | 4.9799919 | 4.754181416  | -0.352108471 | -0.352108471 | -0.352108471 |
| 105371602 | 4.087257665  | 3.7993632 | 4.375152081  | 1.32702005   | 2.721666055  | 2.024343053  |
| 105371606 | 5.493783215  | 5.084979  | 5.902587387  | -0.352108471 | -0.352108471 | -0.352108471 |
| 105371634 | 2.783958294  | 3.821987  | 1.745929632  | -0.352108471 | -0.352108471 | -0.352108471 |
| 105371649 | -0.352108471 | -0.352108 | -0.352108471 | 5.710172012  | 5.596916991  | 5.48366197   |
| 105371654 | 6.03798158   | 5.369033  | 6.7069302    | 6.529856559  | 5.821410838  | 5.112965116  |
| 105371676 | -0.352108471 | -0.352108 | -0.352108471 | 6.897035646  | 6.061485107  | 6.479260377  |
| 105371692 | 5.895550985  | 5.5293114 | 6.261790604  | 6.9068292    | 7.146480757  | 6.667177643  |
| 105371695 | -0.352108471 | -0.352108 | -0.352108471 | 6.266367194  | 6.276856601  | 6.255877787  |
| 105371743 | 3.580473277  | 8.2905092 | 5.935491224  | 4.645260436  | 4.020996898  | 3.39673336   |
| 105371748 | 6.152309613  | 5.5535653 | 5.852937462  | -0.352108471 | -0.352108471 | -0.352108471 |
| 105371774 | 5.55876787   | 6.0780648 | 5.039470984  | 0.044132154  | -0.352108471 | 0.440372779  |



|           |              |           |              |              |              |              |
|-----------|--------------|-----------|--------------|--------------|--------------|--------------|
| 105371783 | -0.352108471 | -0.352108 | -0.352108471 | 6.396868383  | 6.410585269  | 6.383151496  |
| 105371787 | 2.201036472  | 0.1521352 | 4.249937703  | -0.352108471 | -0.352108471 | -0.352108471 |
| 105371794 | 6.637460404  | 5.6657109 | 6.151585628  | -0.352108471 | -0.352108471 | -0.352108471 |
| 105371804 | 7.258982997  | 8.1557272 | 6.362238773  | 6.938652084  | 6.056053999  | 5.173455914  |
| 105371828 | 6.703005628  | 7.3432278 | 7.983450005  | 4.337329384  | 4.490576065  | 4.413952725  |
| 105371838 | 4.939235113  | 4.6518549 | 4.364474699  | 0.95479973   | 2.612597735  | 1.783698732  |
| 105371839 | 6.396868383  | 5.2841754 | 7.509561332  | 4.66005769   | 3.805518094  | 5.514597285  |
| 105371850 | 4.621079993  | 4.9470072 | 5.272934386  | -0.352108471 | -0.352108471 | -0.352108471 |
| 105371860 | -0.352108471 | -0.352108 | -0.352108471 | 3.742557626  | 7.7482313    | 5.745394463  |
| 105371912 | 8.706411595  | 8.6820009 | 8.730822261  | 7.09730403   | 7.314125625  | 6.880482436  |
| 105371913 | 2.803125457  | 2.3941612 | 3.212089674  | -0.352108471 | -0.352108471 | -0.352108471 |
| 105371919 | 5.958359385  | 3.6800839 | 8.236634836  | -0.352108471 | -0.352108471 | -0.352108471 |
| 105371920 | 3.545346924  | 5.3381081 | 4.441727503  | 3.649440074  | 1.906323156  | 5.392556992  |
| 105371925 | 5.504664173  | 5.9941401 | 5.749402114  | 5.959308615  | 5.859617369  | 5.759926123  |
| 105371941 | -0.352108471 | -0.352108 | -0.352108471 | 3.683183745  | 2.586774247  | 4.779593243  |
| 105371943 | -0.352108471 | -0.352108 | -0.352108471 | 2.748265035  | 3.919505936  | 5.090746836  |
| 105371946 | 3.92027207   | 6.1140008 | 5.017136436  | -0.352108471 | -0.352108471 | -0.352108471 |
| 105371984 | 6.537383725  | 7.4727585 | 5.602008994  | -0.352108471 | -0.352108471 | -0.352108471 |
| 105371998 | 5.440881004  | 5.6890856 | 5.19267643   | 6.19018895   | 4.405759666  | 5.297974308  |
| 105372000 | -0.352108471 | -0.352108 | -0.352108471 | 2.686833264  | 1.897647301  | 3.476019226  |
| 105372007 | -0.352108471 | -0.352108 | -0.352108471 | 5.841772725  | 4.456886199  | 3.071999674  |
| 105372013 | 7.160036637  | 5.7532474 | 4.346458241  | -0.352108471 | -0.352108471 | -0.352108471 |
| 105372019 | -0.352108471 | -0.352108 | -0.352108471 | 3.897396099  | 7.745425577  | 5.821410838  |
| 105372056 | -0.352108471 | -0.352108 | -0.352108471 | 6.12990004   | 6.883222067  | 5.376578013  |
| 105372092 | -0.352108471 | -0.352108 | -0.352108471 | 7.478388974  | 1.435383425  | 4.456886199  |
| 105372109 | 7.623320807  | 4.1558905 | 5.889605647  | 3.337001686  | 4.482692559  | 2.191310813  |
| 105372115 | -0.476070528 | 5.103954  | 2.313941724  | -0.352108471 | -0.352108471 | -0.352108471 |
| 105372126 | 6.242048279  | 6.2558778 | 6.228218771  | 0.044132154  | -0.352108471 | 0.440372779  |
| 105372143 | -0.352108471 | -0.352108 | -0.352108471 | 5.169157826  | 5.750484729  | 4.587830922  |
| 105372160 | 2.553073296  | 1.4056176 | 3.700528987  | -0.352108471 | -0.352108471 | -0.352108471 |
| 105372176 | 5.393115701  | 6.9219153 | 3.864316134  | -0.352108471 | -0.352108471 | -0.352108471 |
| 105372190 | -0.352108471 | -0.352108 | -0.352108471 | 5.233567424  | 6.458152413  | 4.008982434  |
| 105372195 | 4.560468605  | 4.9470072 | 5.333545773  | -0.352108471 | -0.352108471 | -0.352108471 |
| 105372197 | 3.212513362  | 7.9050224 | 5.55876787   | -0.352108471 | -0.352108471 | -0.352108471 |
| 105372201 | 5.089412202  | 5.1245435 | 5.054280952  | -0.352108471 | -0.352108471 | -0.352108471 |
| 105372202 | -0.352108471 | -0.352108 | -0.352108471 | 3.706243326  | 6.328029545  | 5.017136436  |
| 105372209 | 5.90029238   | 5.9200251 | 5.880559702  | -0.352108471 | -0.352108471 | -0.352108471 |
| 105372218 | 3.805664353  | 6.1925657 | 1.418763015  | 2.185115095  | 3.245625856  | 4.306136617  |
| 105372231 | -0.352108471 | -0.352108 | -0.352108471 | 5.258845866  | 6.31523113   | 7.371616395  |
| 105372263 | 7.979998603  | 6.5373837 | 5.094768846  | 8.772235414  | 6.479260377  | 4.186285339  |
| 105372269 | 6.059993141  | 6.1999612 | 5.920025058  | 0.044132154  | -0.352108471 | 0.440372779  |
| 105372272 | -0.352108471 | -0.352108 | -0.352108471 | 2.765800232  | 3.77959546   | 4.793390687  |
| 105372275 | 2.351086241  | 0.6479807 | 4.05419183   | 3.670176582  | 5.804928738  | 4.73755266   |
| 105372277 | 7.413456664  | 4.0256733 | 5.719564994  | 3.85262404   | 1.206270807  | 2.529447424  |
| 105372294 | 5.607291125  | 5.8001998 | 5.99310845   | -0.352108471 | -0.352108471 | -0.352108471 |
| 105372300 | -0.352108471 | -0.352108 | -0.352108471 | 2.525716947  | -0.352108471 | 5.403542364  |
| 105372305 | -0.352108471 | -0.352108 | -0.352108471 | 6.124301981  | 5.893442277  | 6.355161685  |

|           |              |           |              |              |              |              |
|-----------|--------------|-----------|--------------|--------------|--------------|--------------|
| 105372306 | 4.248783913  | 6.9338273 | 5.591305588  | 1.223721097  | 1.305230684  | 1.14221151   |
| 105372310 | 7.0366128    | 7.352529  | 6.720696571  | -0.352108471 | -0.352108471 | -0.352108471 |
| 105372315 | 8.122667381  | 6.9398718 | 5.757076216  | -0.352108471 | -0.352108471 | -0.352108471 |
| 105372318 | -0.352108471 | -0.352108 | -0.352108471 | 6.676169033  | 6.698467242  | 6.653870824  |
| 105372325 | 6.910176716  | 6.816905  | 6.723633369  | 1.968661759  | 1.997577452  | 1.939746065  |
| 105372327 | -0.352108471 | -0.352108 | -0.352108471 | 3.259218329  | 4.539984809  | 1.978451848  |
| 105372331 | 5.939010806  | 6.6235409 | 7.30807106   | -0.352108471 | -0.352108471 | -0.352108471 |
| 105372337 | -0.352108471 | -0.352108 | -0.352108471 | 3.086062074  | 3.919505936  | 2.252618212  |
| 105372372 | -0.352108471 | -0.352108 | -0.352108471 | 6.434644758  | 5.327736786  | 7.54155273   |
| 105372386 | 5.484614182  | 2.7762562 | 4.13043521   | 4.590089232  | 4.518591297  | 4.554340264  |
| 105372387 | 6.757030794  | 4.4339685 | 5.595499658  | 4.300487042  | 7.826417261  | 6.063452152  |
| 105372389 | 6.007374565  | 8.1050157 | 7.05619511   | 6.423769798  | 6.689878453  | 6.157661143  |
| 105372401 | -0.352108471 | -0.352108 | -0.352108471 | 5.69326252   | 6.174080069  | 5.212444972  |
| 105372416 | -0.352108471 | -0.352108 | -0.352108471 | 5.150781781  | 8.187775524  | 2.113788037  |
| 105372436 | 6.123913494  | 6.8251815 | 7.526449601  | 6.56915909   | 5.648630776  | 7.489687404  |
| 105372448 | 4.792303669  | 4.8304259 | 4.754181416  | -0.352108471 | -0.352108471 | -0.352108471 |
| 105372453 | 2.685732087  | 1.2722316 | 4.099232606  | -0.352108471 | -0.352108471 | -0.352108471 |
| 105372474 | 5.277506698  | 5.463922  | 5.650337352  | 0.86953393   | 0.808855576  | 0.930212283  |
| 105372479 | 1.173067317  | 1.5010176 | 1.828967852  | 2.036185252  | 1.315841796  | 0.59549834   |
| 105372480 | -0.352108471 | -0.352108 | -0.352108471 | 7.145752419  | 6.235921161  | 5.326089903  |
| 105372481 | 6.657100227  | 6.0078331 | 6.332466669  | -0.352108471 | -0.352108471 | -0.352108471 |
| 105372487 | -0.352108471 | -0.352108 | -0.352108471 | 1.968661759  | 1.997577452  | 1.939746065  |
| 105372488 | -0.161866399 | 5.0644478 | 2.451290702  | 3.400229289  | 2.82785899   | 2.255488691  |
| 105372489 | -0.352108471 | -0.352108 | -0.352108471 | 6.070043966  | 6.101634422  | 6.038453511  |
| 105372490 | 3.754972794  | 6.0023582 | 4.878665478  | -0.352108471 | -0.352108471 | -0.352108471 |
| 105372500 | -0.352108471 | -0.352108 | -0.352108471 | 3.211896338  | 8.367629114  | 5.789762726  |
| 105372553 | 7.779049226  | 6.183964  | 4.588878805  | -0.352108471 | -0.352108471 | -0.352108471 |
| 105372564 | -0.352108471 | -0.352108 | -0.352108471 | 7.294486055  | 5.923493182  | 4.552500309  |
| 105372569 | -0.352108471 | -0.352108 | -0.352108471 | 5.821410838  | 5.825167992  | 5.817653684  |
| 105372580 | 6.463513944  | 6.1679668 | 6.759061079  | 2.858198167  | 3.615460478  | 2.100935855  |
| 105372583 | -0.352108471 | -0.352108 | -0.352108471 | 2.127314251  | 3.119148782  | 4.110983312  |
| 105372584 | 7.914061853  | 7.111166  | 6.309258102  | 1.308941151  | 6.165346909  | 3.73714403   |
| 105372585 | 5.625160771  | 5.1687474 | 6.081574139  | -0.352108471 | -0.352108471 | -0.352108471 |
| 105372590 | -0.352108471 | -0.352108 | -0.352108471 | 5.904005051  | 7.04134783   | 6.47267644   |
| 105372603 | -0.352108471 | -0.352108 | -0.352108471 | 5.575983727  | 6.137731367  | 5.014236086  |
| 105372607 | 6.081742358  | 7.6121718 | 6.846957097  | 2.33707729   | 0.021502393  | 1.179289842  |
| 105372630 | -0.352108471 | -0.352108 | -0.352108471 | 6.345275458  | 5.982103371  | 6.708447544  |
| 105372647 | 5.937827329  | 6.2083007 | 5.667353966  | 6.750286666  | 6.038179856  | 6.394233261  |
| 105372657 | -0.352108471 | -0.352108 | -0.352108471 | 6.194352735  | 6.802965135  | 7.411577535  |
| 105372659 | 5.952184013  | 6.8415528 | 6.396868383  | 0.940233577  | 2.232575625  | -0.352108471 |
| 105372669 | -0.352108471 | -0.352108 | -0.352108471 | 1.167362396  | 2.686833264  | -0.352108471 |
| 105372683 | -0.352108471 | -0.352108 | -0.352108471 | 5.116484326  | 7.29282819   | 6.204656258  |
| 105372699 | 4.000751846  | 5.7336454 | 7.466538923  | -0.352108471 | -0.352108471 | -0.352108471 |
| 105372700 | -0.352108471 | -0.352108 | -0.352108471 | 4.456886199  | 4.60565593   | 4.308116469  |
| 105372703 | 4.927238735  | 4.9667756 | 4.947007189  | -0.352108471 | -0.352108471 | -0.352108471 |
| 105372705 | 5.74446732   | 4.5406293 | 5.142548317  | -0.352108471 | -0.352108471 | -0.352108471 |
| 105372706 | 2.553073296  | -0.352108 | 5.458255064  | -0.352108471 | -0.352108471 | -0.352108471 |

|           |              |           |              |              |              |              |
|-----------|--------------|-----------|--------------|--------------|--------------|--------------|
| 105372708 | 6.241862871  | 5.5553643 | 5.898613566  | 6.439574147  | 3.818058994  | 1.196543842  |
| 105372716 | 6.414258136  | 6.4453648 | 6.383151496  | -0.352108471 | -0.352108471 | -0.352108471 |
| 105372722 | -0.352108471 | -0.352108 | -0.352108471 | 3.585121301  | 2.861039218  | 4.309203384  |
| 105372729 | 10.99664675  | 9.7527641 | 8.508881449  | 8.737511829  | 5.503380275  | 7.120446052  |
| 105372731 | -0.352108471 | -0.352108 | -0.352108471 | 3.847979261  | 0.947005172  | 2.397492216  |
| 105372733 | 7.251757684  | 7.2622793 | 7.241236027  | 6.47267644   | 6.497336045  | 6.448016836  |
| 105372734 | -0.352108471 | -0.352108 | -0.352108471 | 6.266367194  | 8.836261014  | 3.696473373  |
| 105372759 | 5.381666778  | 4.2755511 | 6.487782447  | -0.352108471 | -0.352108471 | -0.352108471 |
| 105372760 | 5.184151491  | 5.2437595 | 5.124543452  | -0.352108471 | -0.352108471 | -0.352108471 |
| 105372764 | -0.352108471 | -0.352108 | -0.352108471 | 2.881499807  | 3.615460478  | 2.147539136  |
| 105372790 | 4.372287533  | 5.0171364 | 5.661985339  | -0.352108471 | -0.352108471 | -0.352108471 |
| 105372794 | 4.194550202  | 5.0522677 | 5.909985168  | -0.352108471 | -0.352108471 | -0.352108471 |
| 105372802 | -0.352108471 | -0.352108 | -0.352108471 | 2.430691558  | 5.073786662  | 3.75223911   |
| 105372808 | -0.352108471 | -0.352108 | -0.352108471 | 4.120814639  | 5.734543791  | 4.927679215  |
| 105372815 | 6.495254774  | 6.056054  | 5.616853224  | -0.352108471 | -0.352108471 | -0.352108471 |
| 105372837 | 6.349569396  | 7.5408057 | 5.158333044  | 0.845664482  | 2.85116063   | 4.856656779  |
| 105372843 | 5.770788164  | 5.8001998 | 5.829611411  | -0.352108471 | -0.352108471 | -0.352108471 |
| 105372844 | 5.187052848  | 5.3965395 | 5.291796159  | 1.842407068  | 1.876861374  | 1.807952763  |
| 105372855 | 6.38339657   | 5.8242888 | 5.265181     | -0.352108471 | -0.352108471 | -0.352108471 |
| 105372857 | -0.352108471 | -0.352108 | -0.352108471 | 4.11944322   | 3.337746555  | 4.901139884  |
| 105372858 | 4.400341142  | 3.6447708 | 5.155911468  | 3.607229804  | 6.888507299  | 5.247868551  |
| 105372866 | 5.758523395  | 5.2641585 | 6.252888256  | -0.352108471 | -0.352108471 | -0.352108471 |
| 105372870 | 6.265560412  | 6.0703732 | 6.167966808  | -0.352108471 | -0.352108471 | -0.352108471 |
| 105372872 | 3.527916452  | 4.3462168 | 2.709616062  | 1.825906298  | 3.539517737  | 5.253129175  |
| 105372877 | 4.792303669  | 4.8304259 | 4.754181416  | -0.352108471 | -0.352108471 | -0.352108471 |
| 105372884 | -0.352108471 | -0.352108 | -0.352108471 | 6.735779686  | 6.750862801  | 6.720696571  |
| 105372888 | -0.352108471 | -0.352108 | -0.352108471 | 6.056053999  | 6.073654487  | 6.038453511  |
| 105372909 | 4.511889403  | 4.3368437 | 4.161797949  | 2.893678875  | 2.232575625  | 3.554782125  |
| 105372939 | 6.297476393  | 6.7070497 | 6.502263028  | 1.411051924  | 8.623220948  | 5.017136436  |
| 105372952 | 7.77831314   | 5.5657607 | 6.672036922  | 5.816428737  | 9.821148092  | 7.818788415  |
| 105372959 | 4.792303669  | 4.8304259 | 4.754181416  | -0.352108471 | -0.352108471 | -0.352108471 |
| 105372960 | 7.215218797  | 4.7015    | 5.958359385  | 2.458228148  | 1.043426334  | -0.37137548  |
| 105372965 | 6.808340183  | 5.3961231 | 8.22055723   | 5.608521445  | 3.004191963  | 8.212850927  |
| 105372978 | -0.352108471 | -0.352108 | -0.352108471 | 1.789985844  | 2.301055037  | 2.812124231  |
| 105373005 | 6.455749259  | 5.5698028 | 7.341695675  | 5.350030384  | 4.239428057  | 4.79472922   |
| 105373025 | -0.352108471 | -0.352108 | -0.352108471 | 2.212189733  | 3.427687301  | 0.996692165  |
| 105373060 | 2.659360865  | 2.4868796 | 2.314398317  | -0.352108471 | -0.352108471 | -0.352108471 |
| 105373064 | 2.351086241  | 5.054281  | -0.352108471 | -0.352108471 | -0.352108471 | -0.352108471 |
| 105373072 | -0.352108471 | -0.352108 | -0.352108471 | 5.477983694  | 4.071013389  | 4.774498542  |
| 105373085 | 5.073466497  | 6.6400194 | 8.206572288  | 3.276328907  | 2.22936792   | 1.182406934  |
| 105373092 | 6.64651405   | 6.6191582 | 6.67386988   | 6.635453109  | 9.069520854  | 4.201385365  |
| 105373097 | 5.688622647  | 7.9377564 | 3.439488919  | -0.352108471 | -0.352108471 | -0.352108471 |
| 105373107 | 6.2094349    | 7.2011401 | 6.705287512  | -0.352108471 | -0.352108471 | -0.352108471 |
| 105373116 | -0.352108471 | -0.352108 | -0.352108471 | 0.077277834  | 1.891423885  | 3.705569937  |
| 105373132 | -0.352108471 | -0.352108 | -0.352108471 | 2.124237496  | 0.949252571  | 3.299222421  |
| 105373154 | 7.727652175  | 6.9134889 | 6.099325622  | -0.352108471 | -0.352108471 | -0.352108471 |
| 105373159 | -0.352108471 | -0.352108 | -0.352108471 | 6.163080188  | 6.235352281  | 6.307624374  |

|           |              |           |              |              |              |              |
|-----------|--------------|-----------|--------------|--------------|--------------|--------------|
| 105373172 | 4.51172187   | 4.9735278 | 5.435333789  | -0.352108471 | -0.352108471 | -0.352108471 |
| 105373195 | 5.132275089  | 6.1368079 | 7.141340621  | 3.073599906  | 1.744484008  | 0.41536811   |
| 105373203 | 3.505168771  | 1.1970037 | 2.351086241  | -0.352108471 | -0.352108471 | -0.352108471 |
| 105373244 | 5.876276997  | 5.982996  | 5.769557961  | -0.352108471 | -0.352108471 | -0.352108471 |
| 105373247 | 2.451247688  | 2.4512907 | 2.451333716  | -0.352108471 | -0.352108471 | -0.352108471 |
| 105373249 | -0.352108471 | -0.352108 | -0.352108471 | 5.609138735  | 3.995031086  | 4.80208491   |
| 105373254 | 5.626442006  | 7.522329  | 3.730555035  | -0.352108471 | -0.352108471 | -0.352108471 |
| 105373263 | -0.352108471 | -0.352108 | -0.352108471 | 5.089169987  | 4.456886199  | 3.824602411  |
| 105373273 | -0.352108471 | -0.352108 | -0.352108471 | 4.088118542  | 4.314079953  | 4.201099247  |
| 105373289 | -0.352108471 | -0.352108 | -0.352108471 | 6.660779387  | 5.670961825  | 6.165870606  |
| 105373292 | -0.352108471 | -0.352108 | -0.352108471 | 3.684880912  | 3.245625856  | 2.8063708    |
| 105373297 | -0.352108471 | -0.352108 | -0.352108471 | 3.990917638  | 6.579031074  | 5.284974356  |
| 105373306 | 6.878577877  | 5.5207125 | 4.16284712   | -0.352108471 | -0.352108471 | -0.352108471 |
| 105373316 | 8.340617406  | 11.831005 | 10.08581113  | 9.883770033  | 6.34922329   | 8.116496661  |
| 105373318 | 6.12250122   | 4.0563232 | 5.089412202  | -0.352108471 | -0.352108471 | -0.352108471 |
| 105373329 | 6.778521655  | 6.3657707 | 5.953019844  | -0.352108471 | -0.352108471 | -0.352108471 |
| 105373356 | -0.352108471 | -0.352108 | -0.352108471 | 6.374965413  | 6.165870606  | 5.956775799  |
| 105373362 | -0.352108471 | -0.352108 | -0.352108471 | 5.369332089  | 5.383503645  | 5.355160532  |
| 105373365 | 7.11396904   | 8.0292243 | 6.198713791  | 2.166656576  | 1.646479888  | 2.686833264  |
| 105373369 | 6.353573297  | 6.2858739 | 6.421272681  | -0.352108471 | -0.352108471 | -0.352108471 |
| 105373377 | 2.313941724  | 4.9799919 | -0.352108471 | -0.352108471 | -0.352108471 | -0.352108471 |
| 105373378 | 4.6689304    | 6.377549  | 5.523239719  | -0.352108471 | -0.352108471 | -0.352108471 |
| 105373414 | -0.352108471 | -0.352108 | -0.352108471 | 3.245625856  | 3.337746555  | 3.153505157  |
| 105373424 | 6.155981145  | 5.1398055 | 4.12362985   | -0.352108471 | -0.352108471 | -0.352108471 |
| 105373425 | 5.688622647  | 6.4261829 | 4.951062387  | -0.352108471 | -0.352108471 | -0.352108471 |
| 105373457 | 1.392109249  | 3.136327  | -0.352108471 | 2.685883497  | 3.119148782  | 2.252618212  |
| 105373476 | 5.353790381  | 4.126404  | 6.581176774  | -0.352108471 | -0.352108471 | -0.352108471 |
| 105373479 | 2.407299168  | 4.8786655 | 7.350031788  | -0.352108471 | -0.352108471 | -0.352108471 |
| 105373487 | -0.352108471 | -0.352108 | -0.352108471 | 5.723485516  | 5.731413688  | 5.715557343  |
| 105373488 | 2.618057952  | 5.5882244 | -0.352108471 | -0.352108471 | -0.352108471 | -0.352108471 |
| 105373490 | 5.852937462  | 6.7867168 | 4.919158158  | -0.352108471 | -0.352108471 | -0.352108471 |
| 105373495 | -0.352108471 | -0.352108 | -0.352108471 | 2.451290702  | 5.254689875  | -0.352108471 |
| 105373498 | 5.709671152  | 4.5948231 | 5.152247113  | -0.352108471 | -0.352108471 | -0.352108471 |
| 105373537 | -0.352108471 | -0.352108 | -0.352108471 | 5.859617369  | 5.873345987  | 5.845888751  |
| 105373557 | 6.224581073  | 5.5420741 | 5.88332757   | -0.352108471 | -0.352108471 | -0.352108471 |
| 105373583 | -0.352108471 | -0.352108 | -0.352108471 | 5.501776916  | 4.76985944   | 5.135818178  |
| 105373594 | 2.588601447  | -0.352108 | 5.529311366  | -0.352108471 | -0.352108471 | -0.352108471 |
| 105373604 | 4.539878369  | 5.3537904 | 6.167702393  | -0.352108471 | -0.352108471 | -0.352108471 |
| 105373606 | -0.352108471 | -0.352108 | -0.352108471 | 7.302158403  | 2.717145811  | 5.009652107  |
| 105373622 | -0.352108471 | -0.352108 | -0.352108471 | 6.874660259  | 6.946414218  | 6.802906299  |
| 105373651 | 2.38621749   | 6.5803415 | -1.807906506 | -0.352108471 | -0.352108471 | -0.352108471 |
| 105373673 | 1.392109249  | -0.723524 | 3.507742701  | 1.832717481  | 1.852096656  | 1.842407068  |
| 105373674 | 6.724469766  | 5.8452988 | 7.60364074   | -0.352108471 | -0.352108471 | -0.352108471 |
| 105373681 | 5.449551011  | 6.183964  | 6.918377021  | -0.352108471 | -0.352108471 | -0.352108471 |
| 105373714 | 5.55876787   | 6.3740208 | 4.743514957  | -0.352108471 | -0.352108471 | -0.352108471 |
| 105373726 | -0.352108471 | -0.352108 | -0.352108471 | 6.020506301  | 6.056053999  | 6.091601696  |
| 105373738 | 7.196698817  | 7.352529  | 7.040868605  | 6.658968677  | 6.515031054  | 6.802906299  |

|           |              |           |              |              |              |              |
|-----------|--------------|-----------|--------------|--------------|--------------|--------------|
| 105373761 | -0.352108471 | -0.352108 | -0.352108471 | 5.284974356  | 6.573338478  | 3.996610234  |
| 105373774 | 5.350056358  | 6.056054  | 6.76205164   | 5.742889092  | 6.087644454  | 6.432399817  |
| 105373810 | 2.515697587  | 5.3835036 | -0.352108471 | -0.352108471 | -0.352108471 | -0.352108471 |
| 105373816 | 2.486879591  | 2.4619273 | 2.511831882  | -0.352108471 | -0.352108471 | -0.352108471 |
| 105373824 | 7.972954947  | 6.502263  | 5.031571109  | -0.352108471 | -0.352108471 | -0.352108471 |
| 105373844 | -0.352108471 | -0.352108 | -0.352108471 | 6.296043865  | 5.085644905  | 7.506442826  |
| 105373874 | -0.352108471 | -0.352108 | -0.352108471 | 4.744220006  | 5.169157826  | 5.594095646  |
| 105373895 | -0.352108471 | -0.352108 | -0.352108471 | -0.366252974 | 2.605817304  | 5.577887581  |
| 105373904 | -0.352108471 | -0.352108 | -0.352108471 | 4.871635595  | 4.178899946  | 3.486164297  |
| 105373916 | 5.42626078   | 3.3070879 | 4.36667435   | 0.228373553  | -0.352108471 | 0.808855576  |
| 105373926 | 6.816905042  | 6.7884205 | 6.845389604  | 3.012289909  | 3.337746555  | 2.686833264  |
| 105373943 | 5.080584181  | 6.4487689 | 3.712399503  | 5.056085501  | 3.886404517  | 2.716723534  |
| 105373950 | -0.352108471 | -0.352108 | -0.352108471 | 5.889433849  | 5.859617369  | 5.829800889  |
| 105373954 | -0.352108471 | -0.352108 | -0.352108471 | 6.545950789  | 6.020474238  | 7.071427339  |
| 105373956 | 5.88206096   | 6.2125362 | 6.543011457  | -0.352108471 | -0.352108471 | -0.352108471 |
| 105373958 | 5.375612014  | 5.7494021 | 6.123192214  | -0.352108471 | -0.352108471 | -0.352108471 |
| 105373959 | -0.352108471 | -0.352108 | -0.352108471 | 2.024343053  | 2.051108653  | 1.997577452  |
| 105373968 | -0.352108471 | -0.352108 | -0.352108471 | 5.923493182  | 4.877154119  | 6.969832246  |
| 105373981 | -0.352108471 | -0.352108 | -0.352108471 | 2.419557138  | 5.191222747  | -0.352108471 |
| 105374013 | 5.562159617  | 3.3537661 | 7.770553139  | 5.321820691  | 4.199045311  | 3.076269931  |
| 105374047 | 7.149852634  | 4.5057558 | 5.827804241  | 2.207172287  | 1.598101998  | 0.989031709  |
| 105374066 | 4.716750566  | 3.345325  | 4.031037805  | 1.783698732  | 2.315101139  | 1.252296326  |
| 105374073 | 6.656125064  | 6.6694769 | 6.642773206  | -0.352108471 | -0.352108471 | -0.352108471 |
| 105374084 | 5.469175652  | 5.9583594 | 4.979991919  | 6.041477508  | 5.958359385  | 6.124595632  |
| 105374089 | 6.45166524   | 5.1522471 | 3.852828986  | -0.352108471 | -0.352108471 | -0.352108471 |
| 105374104 | 6.853089993  | 6.6333781 | 7.072801884  | 4.648570438  | 5.709190472  | 5.178880455  |
| 105374105 | 4.736544651  | 6.004054  | 7.271563325  | -0.352108471 | -0.352108471 | -0.352108471 |
| 105374112 | -0.352108471 | -0.352108 | -0.352108471 | 5.017136436  | 5.054280952  | 4.979991919  |
| 105374114 | 6.414258136  | 8.6260328 | 4.2024835    | -0.352108471 | -0.352108471 | -0.352108471 |
| 105374117 | 7.795211269  | 3.9106637 | 5.852937462  | -0.352108471 | -0.352108471 | -0.352108471 |
| 105374125 | 5.552021843  | 6.0483777 | 5.800199788  | 0.044132154  | 0.440372779  | -0.352108471 |
| 105374127 | -0.352108471 | -0.352108 | -0.352108471 | 6.463674915  | 5.228894993  | 7.698454837  |
| 105374129 | -0.352108471 | -0.352108 | -0.352108471 | 5.859617369  | 5.587617059  | 6.131617679  |
| 105374158 | 6.058072194  | 7.7728008 | 6.915436509  | -0.352108471 | -0.352108471 | -0.352108471 |
| 105374166 | 4.720108865  | 3.1133419 | 6.326875794  | 0.542875446  | 1.437859363  | -0.352108471 |
| 105374181 | 8.285755715  | 4.3046829 | 6.295219325  | 4.599436265  | 4.435020481  | 4.270604696  |
| 105374187 | -0.352108471 | -0.352108 | -0.352108471 | 2.076022254  | 2.100935855  | 2.051108653  |
| 105374226 | 0.308208442  | 2.6505957 | 4.992982898  | -0.352108471 | -0.352108471 | -0.352108471 |
| 105374239 | -0.352108471 | -0.352108 | -0.352108471 | 4.80208491   | 6.005916655  | 3.598253165  |
| 105374247 | -0.352108471 | -0.352108 | -0.352108471 | 2.854007231  | 7.321798494  | 5.087902863  |
| 105374267 | -0.352108471 | -0.352108 | -0.352108471 | 1.590060026  | 2.024343053  | 2.458626079  |
| 105374298 | 5.428393874  | 5.4582551 | 5.398532684  | -0.352108471 | -0.352108471 | -0.352108471 |
| 105374301 | 5.019282955  | 2.9706358 | 7.067930135  | 7.346440078  | 2.506219572  | 4.926329825  |
| 105374303 | -0.352108471 | -0.352108 | -0.352108471 | 5.325716078  | 5.084610622  | 5.566821534  |
| 105374304 | 5.995385515  | 5.8829989 | 5.939192221  | -0.352108471 | -0.352108471 | -0.352108471 |
| 105374335 | -0.276880308 | 4.1699861 | 1.946552907  | 4.878170137  | 4.545205492  | 5.211134782  |
| 105374338 | 5.925007489  | 6.5117733 | 5.338241658  | 6.809477782  | 5.704935534  | 4.600393286  |

|           |              |           |              |              |              |              |
|-----------|--------------|-----------|--------------|--------------|--------------|--------------|
| 105374339 | 8.44419954   | 5.5587679 | 2.6733362    | -0.352108471 | -0.352108471 | -0.352108471 |
| 105374340 | 5.249224703  | 7.8760826 | 2.622366844  | -0.352108471 | -0.352108471 | -0.352108471 |
| 105374349 | 2.62245663   | 3.4586652 | 1.786248034  | -0.352108471 | -0.352108471 | -0.352108471 |
| 105374350 | 5.354536482  | 5.8887701 | 6.423003772  | 4.83789099   | 5.688622647  | 6.539354304  |
| 105374357 | 6.331393632  | 7.2863246 | 8.241255661  | -0.352108471 | -0.352108471 | -0.352108471 |
| 105374358 | -0.352108471 | -0.352108 | -0.352108471 | 7.872707178  | 4.785420335  | 1.698133492  |
| 105374363 | 10.32122726  | 8.6310674 | 6.940907504  | 11.33167175  | 7.945175188  | 4.558678625  |
| 105374414 | 5.532069877  | 5.1771923 | 5.35463107   | -0.352108471 | -0.352108471 | -0.352108471 |
| 105374421 | -0.352108471 | -0.352108 | -0.352108471 | 5.249134474  | 6.32531018   | 7.401485887  |
| 105374426 | -0.352108471 | -0.352108 | -0.352108471 | 4.532283971  | 3.82551592   | 4.178899946  |
| 105374439 | 6.295386969  | 4.8267197 | 7.764054204  | -0.352108471 | -0.352108471 | -0.352108471 |
| 105374462 | -0.352108471 | -0.352108 | -0.352108471 | 6.454311268  | 0.715931335  | 3.585121301  |
| 105374477 | -0.352108471 | -0.352108 | -0.352108471 | 4.98893646   | 5.169157826  | 5.349379192  |
| 105374494 | 4.963168291  | 5.8162788 | 5.389723561  | -0.352108471 | -0.352108471 | -0.352108471 |
| 105374507 | 2.44582553   | 5.2437595 | -0.352108471 | -0.352108471 | -0.352108471 | -0.352108471 |
| 105374509 | -0.352108471 | -0.352108 | -0.352108471 | 2.626750568  | 5.605609608  | -0.352108471 |
| 105374533 | -0.352108471 | -0.352108 | -0.352108471 | 2.881499807  | 3.615460478  | 2.147539136  |
| 105374558 | 3.916593774  | 7.6314925 | 5.77404314   | 4.820948486  | 7.853436899  | 1.788460073  |
| 105374582 | -0.352108471 | -0.352108 | -0.352108471 | 1.601336827  | 2.486284199  | 0.716389454  |
| 105374585 | -0.352108471 | -0.352108 | -0.352108471 | 2.211943219  | 2.232575625  | 2.191310813  |
| 105374587 | 4.901506784  | 5.2437595 | 4.559254036  | 5.962630825  | 5.731413688  | 6.193847962  |
| 105374602 | 5.722600146  | 5.5587679 | 5.394935595  | 5.409753312  | 6.730334621  | 6.070043966  |
| 105374637 | 3.851786382  | 7.0760577 | 5.463922025  | -0.352108471 | -0.352108471 | -0.352108471 |
| 105374650 | -0.352108471 | -0.352108 | -0.352108471 | 3.245625856  | 3.337746555  | 3.153505157  |
| 105374708 | 2.588601447  | -0.352108 | 5.529311366  | -0.352108471 | -0.352108471 | -0.352108471 |
| 105374712 | -0.352108471 | -0.352108 | -0.352108471 | 2.787426417  | -1.244678345 | 6.81953118   |
| 105374713 | -0.352108471 | -0.352108 | -0.352108471 | -0.007541461 | 2.274515706  | 4.556572874  |
| 105374767 | -0.352108471 | -0.352108 | -0.352108471 | 2.40503459   | 2.886513546  | 2.645774068  |
| 105374771 | 6.412437211  | 6.4277085 | 6.420072833  | 0.623678479  | 1.540978788  | 2.458279096  |
| 105374775 | -0.352108471 | -0.352108 | -0.352108471 | 3.859631539  | 8.934105226  | 6.396868383  |
| 105374778 | -0.352108471 | -0.352108 | -0.352108471 | 6.089675752  | 3.585121301  | 1.08056685   |
| 105374790 | -0.352108471 | -0.352108 | -0.352108471 | 4.569831023  | 4.178899946  | 3.787968868  |
| 105374795 | 6.860920727  | 3.5740616 | 5.217491139  | -0.352108471 | -0.352108471 | -0.352108471 |
| 105374799 | -0.352108471 | -0.352108 | -0.352108471 | 5.821410838  | 6.470665102  | 5.172156573  |
| 105374800 | 7.666631757  | 4.133953  | 5.90029238   | -0.352108471 | -0.352108471 | -0.352108471 |
| 105374812 | 3.919505936  | 3.9195059 | 3.919505936  | 0.793818797  | -0.352108471 | 1.939746065  |
| 105374835 | -0.352108471 | -0.352108 | -0.352108471 | 5.233567424  | 6.902108188  | 3.565026659  |
| 105374838 | -0.352108471 | -0.352108 | -0.352108471 | 7.316768464  | 5.369332089  | 3.421895714  |
| 105374858 | 6.395996971  | 6.3439771 | 6.448016836  | -0.352108471 | -0.352108471 | -0.352108471 |
| 105374866 | 5.291399258  | 6.9857424 | 3.597056073  | -0.352108471 | -0.352108471 | -0.352108471 |
| 105374871 | -0.352108471 | -0.352108 | -0.352108471 | 5.789762726  | 5.629207848  | 5.950317604  |
| 105374872 | -0.352108471 | -0.352108 | -0.352108471 | 5.972621945  | 5.821410838  | 5.670199731  |
| 105374879 | 6.242048279  | 8.4159232 | 4.068173401  | -0.352108471 | -0.352108471 | -0.352108471 |
| 105374892 | 1.6561563    | 2.9239264 | 4.191696452  | -0.352108471 | -0.352108471 | -0.352108471 |
| 105374932 | 1.985287245  | 5.0894122 | 8.193537159  | -0.352108471 | -0.352108471 | -0.352108471 |
| 105374970 | 3.228477782  | 5.3920006 | 7.55523459   | -0.352108471 | -0.352108471 | -0.352108471 |
| 105374983 | 4.754181416  | 6.5199701 | 2.988392724  | -0.352108471 | -0.352108471 | -0.352108471 |



|           |              |           |              |              |              |              |
|-----------|--------------|-----------|--------------|--------------|--------------|--------------|
| 105374984 | 7.217668718  | 4.2811355 | 5.749402114  | -0.352108471 | -0.352108471 | -0.352108471 |
| 105374986 | 6.914839026  | 6.1675828 | 5.420326646  | -0.352108471 | -0.352108471 | -0.352108471 |
| 105374988 | 9.303741924  | 7.5281072 | 5.752472553  | 0.440372779  | 0.440372779  | 0.440372779  |
| 105374989 | 5.054280952  | 4.3557095 | 5.752852389  | 1.761670631  | 1.646479888  | 1.876861374  |
| 105375021 | -0.352108471 | -0.352108 | -0.352108471 | 4.80208491   | 4.843308497  | 4.760861323  |
| 105375032 | 5.625160771  | 6.7628703 | 4.487451286  | -0.352108471 | -0.352108471 | -0.352108471 |
| 105375043 | 5.640043677  | 6.8233885 | 8.006733384  | 7.115785866  | 3.332849856  | 5.224317861  |
| 105375054 | 5.029645164  | 5.7945685 | 4.264721793  | 2.19321233   | 0.348096305  | 1.270654317  |
| 105375056 | -0.352108471 | -0.352108 | -0.352108471 | 3.119148782  | 5.106236715  | 1.132060848  |
| 105375063 | 5.638684911  | 6.295387  | 6.952089027  | 0.624614178  | 0.440372779  | 0.808855576  |
| 105375064 | 8.7701777    | 3.6548947 | 6.212536209  | -0.352108471 | -0.352108471 | -0.352108471 |
| 105375085 | -0.352108471 | -0.352108 | -0.352108471 | 6.12990004   | 6.135204448  | 6.124595632  |
| 105375087 | -0.352108471 | -0.352108 | -0.352108471 | 3.558956552  | 2.686833264  | 4.43107984   |
| 105375099 | -0.352108471 | -0.352108 | -0.352108471 | 2.351086241  | 5.054280952  | -0.352108471 |
| 105375122 | -0.352108471 | -0.352108 | -0.352108471 | 3.808273748  | 5.369332089  | 6.930390429  |
| 105375128 | 2.62245663   | -0.352108 | 5.597021732  | -0.352108471 | -0.352108471 | -0.352108471 |
| 105375132 | -0.352108471 | -0.352108 | -0.352108471 | 2.98156133   | 6.31523113   | -0.352108471 |
| 105375135 | -0.352108471 | -0.352108 | -0.352108471 | 6.194496374  | 5.772977049  | 5.983736712  |
| 105375137 | -0.352108471 | -0.352108 | -0.352108471 | 5.931958596  | 5.933157898  | 5.9343572    |
| 105375170 | 5.410363371  | -0.174247 | 2.618057952  | -0.352108471 | -0.352108471 | -0.352108471 |
| 105375213 | -0.352108471 | -0.352108 | -0.352108471 | 5.369332089  | 5.383503645  | 5.355160532  |
| 105375217 | 4.163774858  | 2.5002886 | 5.827261103  | -0.352108471 | -0.352108471 | -0.352108471 |
| 105375229 | -0.352108471 | -0.352108 | -0.352108471 | 3.919505936  | 3.919505936  | 3.919505936  |
| 105375249 | -0.352108471 | -0.352108 | -0.352108471 | 6.296043865  | 6.31523113   | 6.276856601  |
| 105375256 | 5.800199788  | 5.825168  | 5.775231583  | -0.352108471 | -0.352108471 | -0.352108471 |
| 105375275 | -0.352108471 | -0.352108 | -0.352108471 | 5.494417177  | 5.107178892  | 5.881655462  |
| 105375282 | 6.257046343  | 6.0921498 | 6.421942902  | -0.352108471 | -0.352108471 | -0.352108471 |
| 105375291 | -0.352108471 | -0.352108 | -0.352108471 | 2.515697587  | 5.383503645  | -0.352108471 |
| 105375301 | 5.754124716  | 5.5882244 | 5.920025058  | 5.588224375  | 5.588224375  | 5.588224375  |
| 105375310 | -0.352108471 | -0.352108 | -0.352108471 | 5.412561087  | 3.961798016  | 6.863324159  |
| 105375320 | -0.352108471 | -0.352108 | -0.352108471 | 5.697771913  | 6.450302837  | 7.202833762  |
| 105375328 | 8.142000074  | 6.413437  | 4.684873917  | -0.352108471 | -0.352108471 | -0.352108471 |
| 105375341 | 5.019618295  | 8.4654695 | 1.573767134  | 2.942215415  | 1.08477577   | 4.799655059  |
| 105375383 | -0.352108471 | -0.352108 | -0.352108471 | 8.275958535  | 5.663737322  | 3.051516109  |
| 105375384 | -0.352108471 | -0.352108 | -0.352108471 | 2.536084801  | 0.440372779  | 4.631796822  |
| 105375388 | 4.64626819   | 3.0491097 | 6.243426649  | 3.416337965  | 7.30326637   | 5.359802168  |
| 105375402 | 2.188261915  | 2.3862175 | 2.584173065  | -0.352108471 | -0.352108471 | -0.352108471 |
| 105375439 | -0.352108471 | -0.352108 | -0.352108471 | 2.039485684  | -0.352108471 | 4.43107984   |
| 105375470 | 5.939192221  | 5.1550092 | 6.723375244  | -0.352108471 | -0.352108471 | -0.352108471 |
| 105375513 | 5.895550985  | 5.3877976 | 6.403304371  | 2.328607617  | 4.576277023  | 3.45244232   |
| 105375521 | 5.089412202  | 5.5578442 | 4.620980171  | 3.68757591   | 4.688318557  | 2.686833264  |
| 105375531 | 7.316116953  | 4.282377  | 5.799246954  | 5.317240836  | 4.044062205  | 4.68065152   |
| 105375539 | 8.09195325   | 6.8018138 | 5.511674297  | -0.352108471 | -0.352108471 | -0.352108471 |
| 105375551 | -0.352108471 | -0.352108 | -0.352108471 | 2.168105043  | 4.688318557  | -0.352108471 |
| 105375562 | 5.688622647  | 5.7155573 | 5.661687951  | -0.352108471 | -0.352108471 | -0.352108471 |
| 105375564 | 7.194061177  | 6.8884138 | 6.58276648   | -0.352108471 | -0.352108471 | -0.352108471 |
| 105375566 | 5.555777437  | 5.6532998 | 5.458255064  | -0.352108471 | -0.352108471 | -0.352108471 |

|           |              |           |              |              |              |              |
|-----------|--------------|-----------|--------------|--------------|--------------|--------------|
| 105375567 | -0.352108471 | -0.352108 | -0.352108471 | 4.716916862  | 7.542883219  | 6.12990004   |
| 105375569 | 7.525541673  | 5.9460177 | 6.735779686  | -0.352108471 | -0.352108471 | -0.352108471 |
| 105375578 | 6.607377459  | 8.7841726 | 4.430582314  | -0.352108471 | -0.352108471 | -0.352108471 |
| 105375587 | -0.352108471 | -0.352108 | -0.352108471 | 2.962374065  | 2.31593942   | 3.60880871   |
| 105375594 | 5.453985405  | 5.1159633 | 5.284974356  | -0.352108471 | -0.352108471 | -0.352108471 |
| 105375620 | 3.977317262  | 1.3835202 | -1.210276951 | 6.204656258  | 10.00068093  | 2.408631584  |
| 105375622 | -0.352108471 | -0.352108 | -0.352108471 | 4.457568814  | 2.660344289  | 3.558956552  |
| 105375631 | 5.530255239  | 7.7841866 | 3.276323907  | -0.352108471 | -0.352108471 | -0.352108471 |
| 105375649 | 5.59738215   | 5.5738939 | 5.550405623  | 5.920076488  | 5.133155767  | 6.706997208  |
| 105375655 | -0.352108471 | -0.352108 | -0.352108471 | 5.406707798  | 5.151189269  | 5.662226327  |
| 105375656 | 5.601099126  | 4.6461319 | 6.556066371  | 1.599335848  | 1.583494647  | 1.591415247  |
| 105375683 | -0.352108471 | -0.352108 | -0.352108471 | 1.524736735  | 2.575541304  | 3.626345874  |
| 105375686 | 8.663779949  | 3.2968881 | 5.980334028  | -0.352108471 | -0.352108471 | -0.352108471 |
| 105375687 | -0.352108471 | -0.352108 | -0.352108471 | 4.414759241  | 5.169157826  | 5.92355641   |
| 105375707 | 8.106040581  | 5.7980585 | 3.490076465  | 5.042189825  | 5.243015607  | 4.841364044  |
| 105375713 | 5.290506345  | 4.603508  | 4.947007189  | 2.461532669  | 4.444204054  | 0.478861285  |
| 105375720 | -0.352108471 | -0.352108 | -0.352108471 | 2.560258305  | 2.88624358   | 3.212228856  |
| 105375740 | 5.278213198  | 8.9629091 | 7.120561127  | 5.8849336    | 5.613072698  | 6.156794501  |
| 105375742 | -0.352108471 | -0.352108 | -0.352108471 | 5.284974356  | 5.315258837  | 5.254689875  |
| 105375755 | 4.106210896  | 9.3653485 | 6.735779686  | -0.352108471 | -0.352108471 | -0.352108471 |
| 105375757 | 6.6237638    | 7.9019849 | 7.262874357  | 0.440372779  | 0.440372779  | 0.440372779  |
| 105375758 | 7.164235655  | 5.3963175 | 3.628399272  | 1.848631622  | 1.549724107  | 2.147539136  |
| 105375774 | 6.433318728  | 7.93051   | 4.936127502  | -0.352108471 | -0.352108471 | -0.352108471 |
| 105375780 | -0.352108471 | -0.352108 | -0.352108471 | 4.80208491   | 4.843308497  | 4.760861323  |
| 105375786 | -0.352108471 | -0.352108 | -0.352108471 | 5.359952855  | 4.226062513  | 4.793007684  |
| 105375793 | 5.852937462  | 7.0942851 | 4.611589834  | -0.352108471 | -0.352108471 | -0.352108471 |
| 105375808 | 4.967066095  | 5.1799508 | 4.754181416  | -0.352108471 | -0.352108471 | -0.352108471 |
| 105375811 | 2.711561556  | 5.7752316 | -0.352108471 | 3.883156074  | 5.958359385  | 1.807952763  |
| 105375813 | 6.172790294  | 3.2168897 | 4.694839979  | -0.352108471 | -0.352108471 | -0.352108471 |
| 105375816 | 2.074063343  | 3.0320832 | 2.553073296  | -0.352108471 | -0.352108471 | -0.352108471 |
| 105375829 | 2.588601447  | -0.352108 | 5.529311366  | -0.352108471 | -0.352108471 | -0.352108471 |
| 105375835 | -0.352108471 | -0.352108 | -0.352108471 | 3.794327429  | 4.199045311  | 4.603763193  |
| 105375855 | -0.352108471 | -0.352108 | -0.352108471 | 7.483893437  | 1.429878962  | 4.456886199  |
| 105375882 | 3.955096794  | 5.9389176 | 4.947007189  | -0.352108471 | -0.352108471 | -0.352108471 |
| 105375898 | -0.352108471 | -0.352108 | -0.352108471 | 0.514115655  | 3.245625856  | 5.977136057  |
| 105375904 | -0.352108471 | -0.352108 | -0.352108471 | 3.077965061  | 5.715557343  | 0.440372779  |
| 105375911 | -0.352108471 | -0.352108 | -0.352108471 | 1.968661759  | 1.997577452  | 1.939746065  |
| 105375912 | 4.783573432  | 8.5646843 | 6.674128879  | -0.352108471 | -0.352108471 | -0.352108471 |
| 105375917 | 7.729712101  | 4.6953603 | 6.212536209  | -0.352108471 | -0.352108471 | -0.352108471 |
| 105375940 | 1.47406176   | 8.8971118 | 5.185586761  | 1.906998677  | 3.66091791   | 2.783958294  |
| 105375941 | -0.352108471 | -0.352108 | -0.352108471 | 2.38621749   | 2.512372412  | 2.260062568  |
| 105375945 | 8.139272684  | 6.216547  | 4.293821333  | 4.971274502  | 2.596602547  | 3.783938524  |
| 105375950 | -0.352108471 | -0.352108 | -0.352108471 | 5.575983727  | 5.588224375  | 5.563743079  |
| 105375962 | 5.217491139  | 4.5792903 | 5.855691969  | -0.352108471 | -0.352108471 | -0.352108471 |
| 105376019 | -0.352108471 | -0.352108 | -0.352108471 | 1.968661759  | 1.997577452  | 1.939746065  |
| 105376023 | 5.012258842  | 5.9984064 | 6.984554053  | -0.352108471 | -0.352108471 | -0.352108471 |
| 105376025 | -0.352108471 | -0.352108 | -0.352108471 | 5.458255064  | 2.338521244  | 8.577988884  |

|           |              |           |              |              |              |              |
|-----------|--------------|-----------|--------------|--------------|--------------|--------------|
| 105376032 | -0.352108471 | -0.352108 | -0.352108471 | 5.20089139   | 5.254689875  | 5.147092904  |
| 105376038 | -0.352108471 | -0.352108 | -0.352108471 | 3.245625856  | 1.671067963  | 4.820183749  |
| 105376043 | -0.352108471 | -0.352108 | -0.352108471 | 2.313941724  | -0.352108471 | 4.979991919  |
| 105376047 | 3.787792627  | 4.5503078 | 5.312822976  | 1.914522387  | 1.14221151   | 2.686833264  |
| 105376054 | 6.77374078   | 6.7884205 | 6.759061079  | -0.352108471 | -0.352108471 | -0.352108471 |
| 105376060 | 2.481697     | 2.8278825 | 2.65478974   | -0.352108471 | -0.352108471 | -0.352108471 |
| 105376066 | 4.628663253  | 4.4660231 | 4.547343177  | 0.598807818  | 1.549724107  | -0.352108471 |
| 105376069 | -0.352108471 | -0.352108 | -0.352108471 | 0.849500091  | 2.051108653  | -0.352108471 |
| 105376104 | 5.861579664  | 5.5293114 | 6.193847962  | 1.14221151   | 1.14221151   | 1.14221151   |
| 105376111 | 5.409204555  | 6.2966704 | 5.852937462  | -0.352108471 | -0.352108471 | -0.352108471 |
| 105376117 | 3.630849757  | 6.183964  | 8.737078274  | -0.352108471 | -0.352108471 | -0.352108471 |
| 105376128 | 8.492738743  | 10.664143 | 6.321334015  | 8.321040554  | 5.23198494   | 6.776512747  |
| 105376146 | 6.861057494  | 6.8767254 | 6.845389604  | -0.352108471 | -0.352108471 | -0.352108471 |
| 105376148 | -0.352108471 | -0.352108 | -0.352108471 | 5.826557872  | 5.325409581  | 5.575983727  |
| 105376158 | -0.352108471 | -0.352108 | -0.352108471 | 4.106651958  | 7.443484474  | 5.775068216  |
| 105376161 | -0.352108471 | -0.352108 | -0.352108471 | 5.627005534  | 4.45056856   | 6.803442508  |
| 105376162 | -0.352108471 | -0.352108 | -0.352108471 | 3.585121301  | 5.334128418  | 1.836114185  |
| 105376165 | 1.792110488  | 8.580167  | 5.186138762  | -0.352108471 | -0.352108471 | -0.352108471 |
| 105376166 | -0.352108471 | -0.352108 | -0.352108471 | 4.268504401  | 5.383503645  | 3.153505157  |
| 105376195 | 3.993556661  | 9.8337441 | 6.913650398  | 5.127162765  | 2.945847087  | 0.764531408  |
| 105376201 | -0.352108471 | -0.352108 | -0.352108471 | 7.731292938  | 4.409837064  | 6.070565001  |
| 105376209 | 5.661212991  | 8.060902  | 6.861057494  | -0.352108471 | -0.352108471 | -0.352108471 |
| 105376225 | 6.735779686  | 9.0567866 | 4.414772801  | -0.352108471 | -0.352108471 | -0.352108471 |
| 105376228 | -0.352108471 | -0.352108 | -0.352108471 | 2.492032424  | 5.336173319  | -0.352108471 |
| 105376238 | 8.496542827  | 5.3832008 | 6.939871798  | -0.352108471 | -0.352108471 | -0.352108471 |
| 105376239 | 4.295080645  | 5.0007509 | 3.589410353  | 0.395051519  | -0.352108471 | 1.14221151   |
| 105376243 | -0.352108471 | -0.352108 | -0.352108471 | 8.244273989  | 5.958359385  | 3.67244478   |
| 105376256 | 5.53725808   | 5.2849744 | 5.032690632  | -0.352108471 | -0.352108471 | -0.352108471 |
| 105376257 | -0.352108471 | -0.352108 | -0.352108471 | 1.400698343  | -0.352108471 | 3.153505157  |
| 105376266 | -0.352108471 | -0.352108 | -0.352108471 | 5.637296679  | 5.653299811  | 5.621293547  |
| 105376272 | 5.4641134    | 5.5599715 | 5.655829615  | 2.881499807  | 3.615460478  | 2.147539136  |
| 105376290 | 5.402061931  | 5.5587679 | 5.715473809  | -0.352108471 | -0.352108471 | -0.352108471 |
| 105376312 | 3.70869183   | 5.5124423 | 4.610567068  | -0.352108471 | -0.352108471 | -0.352108471 |
| 105376317 | -0.352108471 | -0.352108 | -0.352108471 | 1.946552907  | 4.245214285  | -0.352108471 |
| 105376318 | -0.352108471 | -0.352108 | -0.352108471 | 8.340490145  | 6.434644758  | 4.528799372  |
| 105376322 | -0.352108471 | -0.352108 | -0.352108471 | 2.124237496  | 2.028091952  | 2.22038304   |
| 105376324 | 5.284974356  | 3.7809281 | 6.789020613  | -0.352108471 | -0.352108471 | -0.352108471 |
| 105376326 | 7.581497581  | 3.8180246 | 5.69976107   | 2.43572631   | 0.440372779  | 4.43107984   |
| 105376338 | 4.792303669  | 4.8304259 | 4.754181416  | -0.352108471 | -0.352108471 | -0.352108471 |
| 105376384 | 8.216975399  | 5.8242888 | 3.431602171  | 2.100935855  | 2.100935855  | 2.100935855  |
| 105376387 | 5.493783215  | 6.2532684 | 4.73429806   | 1.223721097  | 1.14221151   | 1.305230684  |
| 105376388 | -0.352108471 | -0.352108 | -0.352108471 | 3.058133858  | 5.760537073  | 8.462940288  |
| 105376394 | -0.352108471 | -0.352108 | -0.352108471 | 1.90830372   | 1.939746065  | 1.876861374  |
| 105376425 | -0.352108471 | -0.352108 | -0.352108471 | 5.907948707  | 5.233567424  | 4.55918614   |
| 105376427 | 5.813110936  | 5.1065363 | 6.519685616  | 3.997152479  | 2.18436845   | 3.090760465  |
| 105376434 | -0.352108471 | -0.352108 | -0.352108471 | 7.735227386  | 4.797507002  | 6.266367194  |
| 105376436 | -0.352108471 | -0.352108 | -0.352108471 | 4.879761376  | 5.663737322  | 6.447713268  |

|           |              |           |              |              |              |              |
|-----------|--------------|-----------|--------------|--------------|--------------|--------------|
| 105376464 | 2.618057952  | 1.6808649 | 3.555250981  | -0.352108471 | -0.352108471 | -0.352108471 |
| 105376474 | -0.352108471 | -0.352108 | -0.352108471 | 2.974588569  | 7.059684302  | 5.017136436  |
| 105376491 | 5.825318483  | 4.3257206 | 5.075519558  | 2.496320744  | 0.792032047  | 4.20060944   |
| 105376513 | 5.152247113  | 3.4244886 | 6.880005656  | -0.352108471 | -0.352108471 | -0.352108471 |
| 105376516 | -0.352108471 | -0.352108 | -0.352108471 | 3.73714403   | 3.919505936  | 3.554782125  |
| 105376546 | -0.352108471 | -0.352108 | -0.352108471 | 5.412561087  | 5.421579811  | 5.403542364  |
| 105376554 | 6.136667708  | 6.6378887 | 7.139109629  | 3.699359721  | 3.762236766  | 3.636482675  |
| 105376560 | -0.352108471 | -0.352108 | -0.352108471 | 2.761826744  | 4.007138891  | 3.384482817  |
| 105376562 | 6.738649524  | 6.8312892 | 6.923928891  | -0.352108471 | -0.352108471 | -0.352108471 |
| 105376591 | 2.764225616  | 0.2585353 | 5.269915917  | -0.352108471 | -0.352108471 | -0.352108471 |
| 105376601 | -0.352108471 | -0.352108 | -0.352108471 | 2.686833264  | 2.686833264  | 2.686833264  |
| 105376612 | 4.854844895  | 6.3954766 | 5.625160771  | -0.352108471 | -0.352108471 | -0.352108471 |
| 105376620 | -0.352108471 | -0.352108 | -0.352108471 | 2.501526031  | -0.352108471 | 5.355160532  |
| 105376630 | 6.64818489   | 5.7494021 | 4.850619339  | -0.352108471 | -0.352108471 | -0.352108471 |
| 105376632 | -0.352108471 | -0.352108 | -0.352108471 | 1.631676003  | 3.615460478  | -0.352108471 |
| 105376677 | 5.246056936  | 4.256114  | 6.235999889  | 7.343465972  | 3.664906032  | 5.504186002  |
| 105376681 | 3.449995986  | 4.9774847 | 6.504973388  | 0.476561106  | 1.305230684  | -0.352108471 |
| 105376684 | 4.537335758  | 5.366581  | 3.708090482  | -0.352108471 | -0.352108471 | -0.352108471 |
| 105376685 | -0.352108471 | -0.352108 | -0.352108471 | 1.880238567  | -0.352108471 | 4.112585606  |
| 105376705 | 2.523212107  | -0.352108 | 5.398532684  | -0.352108471 | -0.352108471 | -0.352108471 |
| 105376716 | 9.127181534  | 3.3266592 | 6.226920361  | 0.735127777  | 2.571154353  | 4.407180928  |
| 105376735 | 2.197246788  | 3.1742174 | 2.685732087  | -0.352108471 | -0.352108471 | -0.352108471 |
| 105376737 | -0.352108471 | -0.352108 | -0.352108471 | 1.400698343  | 4.051124344  | -1.249727659 |
| 105376743 | 6.034554801  | 5.2157667 | 5.625160771  | -0.352108471 | -0.352108471 | -0.352108471 |
| 105376776 | 4.161423262  | 6.8850562 | 5.523239719  | -0.352108471 | -0.352108471 | -0.352108471 |
| 105376779 | 6.967511245  | 6.9786128 | 6.956409727  | -0.352108471 | -0.352108471 | -0.352108471 |
| 105376782 | -0.352108471 | -0.352108 | -0.352108471 | 2.577819651  | 2.793732842  | 3.009646032  |
| 105376785 | -0.352108471 | -0.352108 | -0.352108471 | 3.119148782  | 3.119148782  | 3.119148782  |
| 105376794 | 4.201099247  | 3.9195059 | 4.482692559  | 2.039485684  | -0.352108471 | 4.43107984   |
| 105376807 | -0.352108471 | -0.352108 | -0.352108471 | 6.3862009    | 5.939192221  | 5.492183543  |
| 105376813 | -0.352108471 | -0.352108 | -0.352108471 | 5.789762726  | 5.804293869  | 5.775231583  |
| 105376831 | 6.674128879  | 6.797202  | 6.551055783  | -0.352108471 | -0.352108471 | -0.352108471 |
| 105376832 | -0.352108471 | -0.352108 | -0.352108471 | 0.874413692  | -0.352108471 | 2.100935855  |
| 105376851 | -0.352108471 | -0.352108 | -0.352108471 | 3.716380147  | 2.221964512  | 0.727548877  |
| 105376856 | 6.276782173  | 5.3236174 | 5.800199788  | -0.352108471 | -0.352108471 | -0.352108471 |
| 105376857 | 5.688622647  | 7.457536  | 3.919709244  | -0.352108471 | -0.352108471 | -0.352108471 |
| 105376868 | -0.352108471 | -0.352108 | -0.352108471 | 3.168357904  | 8.875743946  | 6.022050925  |
| 105376869 | 2.8251001    | -0.352108 | 6.002308672  | -0.352108471 | -0.352108471 | -0.352108471 |
| 105376875 | 5.435636528  | 5.6818992 | 5.55876787   | -0.352108471 | -0.352108471 | -0.352108471 |
| 105376879 | -0.352108471 | -0.352108 | -0.352108471 | 2.19530121   | 3.875472802  | 5.555644394  |
| 105376896 | 6.181464618  | 7.8378304 | 7.009647498  | 4.394233843  | 4.705448172  | 4.083019514  |
| 105376900 | 6.621016522  | 6.3152311 | 6.926801914  | 3.899998205  | 4.245214285  | 3.554782125  |
| 105376908 | -0.352108471 | -0.352108 | -0.352108471 | 3.998406827  | 5.686783237  | 2.310030417  |
| 105376909 | -0.352108471 | -0.352108 | -0.352108471 | 0.392735488  | 3.500370326  | 1.946552907  |
| 105376911 | 5.801482926  | 6.4033455 | 5.199620343  | 2.176777034  | 2.252618212  | 2.100935855  |
| 105376916 | 6.333874251  | 7.4387432 | 6.886308748  | -0.352108471 | -0.352108471 | -0.352108471 |
| 105376918 | 4.22804496   | 4.0798907 | 4.153967827  | 1.77365078   | 1.220653946  | 2.326647613  |

|           |              |           |              |              |              |              |
|-----------|--------------|-----------|--------------|--------------|--------------|--------------|
| 105376927 | 1.048715362  | 2.7402102 | 4.431705103  | -0.352108471 | -0.352108471 | -0.352108471 |
| 105376934 | 7.758360446  | 5.0353763 | 6.396868383  | -0.352108471 | -0.352108471 | -0.352108471 |
| 105376938 | -0.352108471 | -0.352108 | -0.352108471 | 1.346495496  | 2.252618212  | 0.440372779  |
| 105376942 | 1.920459576  | 2.5156976 | 3.110935598  | -0.352108471 | -0.352108471 | -0.352108471 |
| 105376956 | 1.149715101  | 1.6345034 | 1.392109249  | 6.088761404  | 6.285554459  | 6.482347513  |
| 105376973 | 4.757610744  | 2.5701985 | 6.945022943  | 3.434816223  | 7.365017787  | 11.29521935  |
| 105376980 | 5.855297211  | 6.6737632 | 7.492229135  | 0.542875446  | -0.352108471 | 1.437859363  |
| 105376984 | 1.383520155  | 0.0593603 | 2.707679997  | 2.241824978  | 5.219123492  | 8.196422005  |
| 105376994 | 7.137727412  | 7.6319432 | 6.643511666  | -0.352108471 | -0.352108471 | -0.352108471 |
| 105377006 | -0.352108471 | -0.352108 | -0.352108471 | 5.596916991  | 5.605609608  | 5.588224375  |
| 105377040 | -0.352108471 | -0.352108 | -0.352108471 | 4.279062203  | 6.410585269  | 2.147539136  |
| 105377050 | 3.41407487   | 3.6660236 | 3.1621261    | 3.730639943  | 6.910870138  | 5.32075504   |
| 105377053 | -0.352108471 | -0.352108 | -0.352108471 | 2.252618212  | 1.630384959  | 2.874851464  |
| 105377057 | 5.140914746  | 4.3639534 | 3.586992098  | -0.512397393 | 2.062346313  | 4.63709002   |
| 105377059 | -0.352108471 | -0.352108 | -0.352108471 | 0.95025487   | -0.352108471 | 2.252618212  |
| 105377077 | -0.352108471 | -0.352108 | -0.352108471 | 5.231098346  | 2.024343053  | -1.182412241 |
| 105377082 | 5.2243927    | 5.632395  | 5.428393874  | -0.352108471 | -0.352108471 | -0.352108471 |
| 105377095 | -0.352108471 | -0.352108 | -0.352108471 | 2.039485684  | -0.352108471 | 4.43107984   |
| 105377100 | 5.416362038  | 5.8339595 | 5.625160771  | -0.352108471 | -0.352108471 | -0.352108471 |
| 105377135 | -0.352108471 | -0.352108 | -0.352108471 | 5.591132762  | 5.494417177  | 5.397701591  |
| 105377167 | 3.993171587  | 4.8902834 | 4.441727503  | 0.647185709  | -0.352108471 | 1.646479888  |
| 105377170 | 2.201036472  | 4.7541814 | -0.352108471 | 5.789762726  | 5.804293869  | 5.775231583  |
| 105377177 | -0.352108471 | -0.352108 | -0.352108471 | 6.266367194  | 8.402117206  | 4.130617182  |
| 105377195 | 5.420390631  | 5.0021813 | 5.838599938  | 1.995427359  | 2.947319917  | 1.043534802  |
| 105377198 | 3.892576082  | 5.719565  | 7.546553907  | -0.352108471 | -0.352108471 | -0.352108471 |
| 105377225 | 5.689140061  | 5.8243239 | 5.553956231  | -0.352108471 | -0.352108471 | -0.352108471 |
| 105377251 | -0.352108471 | -0.352108 | -0.352108471 | 3.806529484  | 1.880238567  | -0.046052349 |
| 105377265 | 4.01084683   | 2.5530733 | 1.095299763  | 3.382913164  | 3.784559474  | 4.186205783  |
| 105377267 | 1.783698732  | 3.9195059 | -0.352108471 | 3.919505936  | 3.919505936  | 3.919505936  |
| 105377292 | 10.95949515  | 3.3467648 | 7.153129997  | 1.58479924   | 0.736841864  | 2.432756617  |
| 105377294 | 6.243962761  | 6.5546628 | 6.865362884  | -0.352108471 | -0.352108471 | -0.352108471 |
| 105377295 | 4.947007189  | 5.2901056 | 4.603908745  | 4.282459364  | 5.958359385  | 7.634259405  |
| 105377310 | -0.352108471 | -0.352108 | -0.352108471 | 4.495751253  | 6.149433787  | 7.803116321  |
| 105377319 | 5.620891261  | 4.8651455 | 6.376637049  | 0.476561106  | -0.352108471 | 1.305230684  |
| 105377320 | -0.352108471 | -0.352108 | -0.352108471 | 5.723485516  | 6.86786121   | 4.579109821  |
| 105377328 | 7.82455912   | 5.7790684 | 6.801813774  | -0.352108471 | -0.352108471 | -0.352108471 |
| 105377352 | 1.709904749  | 2.1035728 | 2.497240816  | 6.001809131  | 4.868750345  | 7.134867918  |
| 105377360 | -0.352108471 | -0.352108 | -0.352108471 | 5.596916991  | 6.193634888  | 5.000199094  |
| 105377362 | 4.197208934  | 2.6857321 | 1.174255241  | 3.773917231  | 4.129105482  | 3.418728979  |
| 105377378 | -0.352108471 | -0.352108 | -0.352108471 | 6.149337851  | 8.792934731  | 3.50574097   |
| 105377400 | 7.138933258  | 6.3968684 | 5.654803507  | -0.352108471 | -0.352108471 | -0.352108471 |
| 105377421 | 5.253240792  | 6.3193075 | 4.187174113  | -0.352108471 | -0.352108471 | -0.352108471 |
| 105377425 | -0.352108471 | -0.352108 | -0.352108471 | 4.73755266   | 4.945386437  | 4.529718883  |
| 105377436 | -0.352108471 | -0.352108 | -0.352108471 | 4.54785697   | 5.723779385  | 5.135818178  |
| 105377442 | 7.297470204  | 8.7416345 | 8.019552374  | 6.713858687  | 3.999320952  | 9.428396423  |
| 105377445 | 2.201036472  | 1.6469568 | 2.755116138  | -0.352108471 | -0.352108471 | -0.352108471 |
| 105377458 | 5.021401806  | 3.1277379 | 1.234073944  | 1.601336827  | -0.352108471 | 3.554782125  |

|           |              |           |              |              |              |              |
|-----------|--------------|-----------|--------------|--------------|--------------|--------------|
| 105377464 | 6.467824574  | 5.6886226 | 4.90942072   | -0.352108471 | -0.352108471 | -0.352108471 |
| 105377466 | -0.352108471 | -0.352108 | -0.352108471 | 6.750362314  | 5.388882507  | 6.06962241   |
| 105377508 | 5.152247113  | 5.0776438 | 5.226850463  | -0.352108471 | -0.352108471 | -0.352108471 |
| 105377533 | 5.514819679  | 5.5587679 | 5.602716062  | -0.352108471 | -0.352108471 | -0.352108471 |
| 105377567 | 6.183964016  | 6.1999612 | 6.167966808  | -0.352108471 | -0.352108471 | -0.352108471 |
| 105377575 | -0.352108471 | -0.352108 | -0.352108471 | 7.968841277  | 1.334967077  | 4.651904177  |
| 105377582 | -0.352108471 | -0.352108 | -0.352108471 | 2.43016825   | -0.352108471 | 5.212444972  |
| 105377597 | -0.352108471 | -0.352108 | -0.352108471 | 5.169157826  | 4.818593164  | 5.519722487  |
| 105377600 | 5.634592072  | 5.5460431 | 5.723141053  | 0.624614178  | 0.808855576  | 0.440372779  |
| 105377616 | 4.878992132  | 6.283251  | 5.581121573  | -0.352108471 | -0.352108471 | -0.352108471 |
| 105377638 | 6.090808341  | 6.1079622 | 6.073654487  | 4.716557081  | 3.615460478  | 5.817653684  |
| 105377639 | 4.736638248  | 1.8973409 | 7.575935553  | 1.30840417   | 3.170669557  | -0.553861217 |
| 105377650 | -0.352108471 | -0.352108 | -0.352108471 | 5.412561087  | 5.421579811  | 5.403542364  |
| 105377690 | -0.352108471 | -0.352108 | -0.352108471 | 5.847512993  | 4.891151184  | 5.369332089  |
| 105377712 | 6.303461245  | 6.5974928 | 6.009429738  | -0.352108471 | -0.352108471 | -0.352108471 |
| 105377716 | -0.352108471 | -0.352108 | -0.352108471 | 1.601517443  | 2.888273049  | 4.175028656  |
| 105377730 | 5.688622647  | 5.7155573 | 5.661687951  | -0.352108471 | -0.352108471 | -0.352108471 |
| 105377732 | 2.740210233  | -0.352108 | 5.832528937  | -0.352108471 | -0.352108471 | -0.352108471 |
| 105377737 | -0.352108471 | -0.352108 | -0.352108471 | 5.412561087  | 4.869345447  | 5.955776728  |
| 105377740 | -0.352108471 | -0.352108 | -0.352108471 | 5.128763636  | 6.145629444  | 4.111897827  |
| 105377757 | 6.020381091  | 6.4097672 | 5.630995022  | -0.352108471 | -0.352108471 | -0.352108471 |
| 105377776 | 5.354685649  | 5.4498053 | 5.259566032  | -0.352108471 | -0.352108471 | -0.352108471 |
| 105377780 | -0.352108471 | -0.352108 | -0.352108471 | 0.191417513  | 5.614564532  | 2.902991023  |
| 105377782 | -0.352108471 | -0.352108 | -0.352108471 | 5.511864271  | 3.805197278  | 7.218531264  |
| 105377813 | 5.765810019  | 6.0023087 | 5.529311366  | 7.667232662  | 7.692669739  | 7.641795584  |
| 105377817 | 5.748354287  | 7.9533982 | 3.543310417  | -0.352108471 | -0.352108471 | -0.352108471 |
| 105377819 | -0.352108471 | -0.352108 | -0.352108471 | 4.80208491   | 4.843308497  | 4.760861323  |
| 105377856 | -0.352108471 | -0.352108 | -0.352108471 | 5.426606128  | 6.235921161  | 7.045236194  |
| 105377859 | 5.493783215  | 6.5851193 | 4.402447165  | -0.352108471 | -0.352108471 | -0.352108471 |
| 105377861 | 5.87518164   | 6.3968684 | 6.918555125  | -0.352108471 | -0.352108471 | -0.352108471 |
| 105377894 | -0.352108471 | -0.352108 | -0.352108471 | 5.117340897  | 5.254689875  | 4.979991919  |
| 105377896 | 5.118418872  | 6.9223433 | 6.020381091  | -0.352108471 | -0.352108471 | -0.352108471 |
| 105377907 | 1.946552907  | 0.8679093 | 3.025196512  | 4.942702387  | 6.588043781  | 3.297360993  |
| 105377908 | 4.46380013   | 4.8786655 | 5.293530827  | -0.352108471 | -0.352108471 | -0.352108471 |
| 105377919 | -0.352108471 | -0.352108 | -0.352108471 | 4.005546737  | 7.441424294  | 5.723485516  |
| 105377928 | -0.352108471 | -0.352108 | -0.352108471 | 7.894586032  | 4.899150733  | 6.396868383  |
| 105377937 | 5.181747782  | 5.8046669 | 4.558828652  | 1.190059422  | 0.440372779  | 1.939746065  |
| 105377940 | 6.686076964  | 5.0547547 | 3.42343246   | -0.352108471 | -0.352108471 | -0.352108471 |
| 105377958 | -0.352108471 | -0.352108 | -0.352108471 | 5.149872953  | 5.095423988  | 5.040975023  |
| 105377986 | 6.303461245  | 7.9362493 | 4.670673235  | -0.352108471 | -0.352108471 | -0.352108471 |
| 105378027 | -0.352108471 | -0.352108 | -0.352108471 | 2.274515706  | 3.30547384   | 1.243557573  |
| 105378031 | 4.928960211  | 4.211158  | 4.570059097  | 3.151146871  | 3.615460478  | 2.686833264  |
| 105378049 | -0.352108471 | -0.352108 | -0.352108471 | 4.178899946  | 4.245214285  | 4.112585606  |
| 105378090 | -0.352108471 | -0.352108 | -0.352108471 | 5.760537073  | 5.775231583  | 5.745842563  |
| 105378095 | -0.352108471 | -0.352108 | -0.352108471 | 6.296043865  | 6.31523113   | 6.276856601  |
| 105378098 | 8.694180684  | 6.7389281 | 4.783675536  | 6.404996167  | 6.280301159  | 6.15560615   |
| 105378131 | -0.352108471 | -0.352108 | -0.352108471 | 5.425370388  | 6.087644454  | 6.74991852   |



|           |              |           |              |              |              |              |
|-----------|--------------|-----------|--------------|--------------|--------------|--------------|
| 105378141 | -0.352108471 | -0.352108 | -0.352108471 | 5.473547957  | 5.458255064  | 5.442962171  |
| 105378146 | -0.352108471 | -0.352108 | -0.352108471 | 0.82273449   | -0.352108471 | 1.997577452  |
| 105378147 | 5.55876787   | 5.5882244 | 5.529311366  | -0.352108471 | -0.352108471 | -0.352108471 |
| 105378150 | -0.352108471 | -0.352108 | -0.352108471 | 4.174760939  | 6.016087037  | 5.095423988  |
| 105378151 | -0.352108471 | -0.352108 | -0.352108471 | 4.29127799   | 4.66005769   | 5.028837389  |
| 105378152 | 5.428393874  | 5.015001  | 5.841786766  | -0.352108471 | -0.352108471 | -0.352108471 |
| 105378155 | -0.352108471 | -0.352108 | -0.352108471 | 6.639034896  | 4.807936135  | 5.723485516  |
| 105378173 | -0.352108471 | -0.352108 | -0.352108471 | 4.650211429  | 4.66990395   | 4.66005769   |
| 105378176 | 5.595499658  | 5.2761208 | 5.914878506  | 0.624614178  | 0.808855576  | 0.440372779  |
| 105378185 | 6.507456839  | 6.2125362 | 5.917615578  | 2.481575183  | 2.934478494  | 2.028671872  |
| 105378190 | 7.000225237  | 5.6162528 | 4.232280409  | -0.352108471 | -0.352108471 | -0.352108471 |
| 105378193 | -0.352108471 | -0.352108 | -0.352108471 | 3.077569294  | 0.489828171  | 1.783698732  |
| 105378238 | 6.831289207  | 9.7248101 | 3.937768275  | -0.352108471 | -0.352108471 | -0.352108471 |
| 105378275 | 2.62245663   | 0.5388276 | 4.706085695  | -0.352108471 | -0.352108471 | -0.352108471 |
| 105378308 | 5.742914374  | 7.9228776 | 3.562951127  | -0.352108471 | -0.352108471 | -0.352108471 |
| 105378309 | -0.352108471 | -0.352108 | -0.352108471 | 2.397492216  | -0.352108471 | 5.147092904  |
| 105378315 | 5.043534014  | 3.2891072 | 6.797960846  | 1.493791735  | 1.549724107  | 1.437859363  |
| 105378341 | 1.392109249  | 3.136327  | -0.352108471 | 1.902765107  | 1.997577452  | 1.807952763  |
| 105378390 | -0.352108471 | -0.352108 | -0.352108471 | 4.453901852  | 4.456886199  | 4.459870547  |
| 105378395 | 6.107538801  | 6.1414231 | 6.073654487  | -0.352108471 | -0.352108471 | -0.352108471 |
| 105378415 | 2.992608695  | 4.8786655 | 6.764722261  | -0.352108471 | -0.352108471 | -0.352108471 |
| 105378427 | 7.387935135  | 4.652827  | 6.020381091  | -0.352108471 | -0.352108471 | -0.352108471 |
| 105378432 | 5.947824374  | 5.6251608 | 5.302497169  | -0.352108471 | -0.352108471 | -0.352108471 |
| 105378451 | -0.352108471 | -0.352108 | -0.352108471 | 2.065292044  | 4.482692559  | -0.352108471 |
| 105378469 | 6.433318728  | 5.4078516 | 7.458785844  | -0.352108471 | -0.352108471 | -0.352108471 |
| 105378488 | 8.397137724  | 5.1522471 | 1.907356502  | -0.352108471 | -0.352108471 | -0.352108471 |
| 105378506 | -0.352108471 | -0.352108 | -0.352108471 | 6.5207905    | 5.017136436  | 3.513482371  |
| 105378512 | 7.496427806  | 7.5676522 | 7.425203426  | -0.352108471 | -0.352108471 | -0.352108471 |
| 105378517 | -0.352108471 | -0.352108 | -0.352108471 | 4.380566524  | 5.439917437  | 6.499268351  |
| 105378525 | 5.625160771  | 5.6532998 | 5.597021732  | 4.927679215  | 4.954218546  | 4.901139884  |
| 105378526 | -0.352108471 | -0.352108 | -0.352108471 | 6.291947162  | 5.575983727  | 4.860020291  |
| 105378527 | -0.352108471 | -0.352108 | -0.352108471 | 5.233567424  | 5.254689875  | 5.212444972  |
| 105378538 | 6.03798158   | 6.0736545 | 6.002308672  | -0.352108471 | -0.352108471 | -0.352108471 |
| 105378550 | 5.926519726  | 5.0171364 | 4.107753145  | -0.352108471 | -0.352108471 | -0.352108471 |
| 105378565 | -0.352108471 | -0.352108 | -0.352108471 | 7.528868501  | 6.039651413  | 4.550434326  |
| 105378579 | -0.352108471 | -0.352108 | -0.352108471 | 2.419557138  | 0.978447378  | 3.860666899  |
| 105378586 | 4.496247384  | 5.873346  | 3.119148782  | -0.352108471 | -0.352108471 | -0.352108471 |
| 105378598 | 8.452104911  | 9.6471416 | 7.25706822   | 1.697414861  | 1.14221151   | 2.252618212  |
| 105378643 | 6.311337777  | 6.2363267 | 6.273832259  | -0.352108471 | -0.352108471 | -0.352108471 |
| 105378669 | 5.529311366  | 5.5293114 | 5.529311366  | 2.931568264  | 5.054280952  | 0.808855576  |
| 105378670 | 4.583433279  | 4.1125856 | 5.054280952  | 0.044132154  | -0.352108471 | 0.440372779  |
| 105378683 | 5.749402114  | 5.0236502 | 6.47515398   | -0.352108471 | -0.352108471 | -0.352108471 |
| 105378695 | -0.352108471 | -0.352108 | -0.352108471 | 5.494417177  | 3.70798208   | 7.280852273  |
| 105378720 | 5.284974356  | 5.3152588 | 5.254689875  | -0.352108471 | -0.352108471 | -0.352108471 |
| 105378725 | -0.352108471 | -0.352108 | -0.352108471 | 4.172619225  | 4.175292888  | 4.17796655   |
| 105378726 | 4.220681375  | 5.8154729 | 7.410264413  | -0.352108471 | -0.352108471 | -0.352108471 |
| 105378742 | -0.352108471 | -0.352108 | -0.352108471 | 4.66005769   | 5.17533982   | 4.144775559  |

|           |              |           |              |              |              |              |
|-----------|--------------|-----------|--------------|--------------|--------------|--------------|
| 105378753 | -0.352108471 | -0.352108 | -0.352108471 | 8.124937532  | 3.98234523   | 6.053641381  |
| 105378759 | 7.527177696  | 7.6875967 | 7.366758653  | 2.854586112  | 0.460134624  | 1.657360368  |
| 105378775 | 7.477981313  | 5.9391922 | 4.40040313   | -0.352108471 | -0.352108471 | -0.352108471 |
| 105378805 | 6.539661058  | 4.2126095 | 8.866712594  | -0.352108471 | -0.352108471 | -0.352108471 |
| 105378813 | 4.878665478  | 4.9140225 | 4.843308497  | -0.352108471 | -0.352108471 | -0.352108471 |
| 105378816 | -0.352108471 | -0.352108 | -0.352108471 | 4.602445978  | 3.755353914  | 4.178899946  |
| 105378841 | -0.352108471 | -0.352108 | -0.352108471 | 2.271463724  | 3.102202803  | 2.686833264  |
| 105378842 | 1.383520155  | -0.352108 | 3.119148782  | 3.196516302  | 4.843308497  | 1.549724107  |
| 105378849 | 1.989646424  | 5.6574939 | 9.325341338  | -0.352108471 | -0.352108471 | -0.352108471 |
| 105378857 | 4.292030912  | 5.0082279 | 5.724424816  | 6.397752545  | 9.73622985   | 8.066991197  |
| 105378863 | -0.352108471 | -0.352108 | -0.352108471 | 2.091873588  | 6.821898811  | 4.456886199  |
| 105378902 | -0.352108471 | -0.352108 | -0.352108471 | 6.335196408  | 7.679732575  | 4.99066024   |
| 105378910 | 6.090808341  | 7.2841592 | 4.897457494  | -0.352108471 | -0.352108471 | -0.352108471 |
| 105378913 | -0.352108471 | -0.352108 | -0.352108471 | 4.176881732  | 0.595553249  | 2.38621749   |
| 105378938 | 1.383520155  | -0.352108 | 3.119148782  | 4.864757091  | 4.617382386  | 4.370007682  |
| 105378939 | -0.352108471 | -0.352108 | -0.352108471 | 5.104454211  | 4.726111306  | 5.482797115  |
| 105378951 | -0.352108471 | -0.352108 | -0.352108471 | 0.940233577  | 2.232575625  | -0.352108471 |
| 105378957 | 5.223934733  | 4.3218845 | 4.772909641  | 5.230387232  | 5.812486125  | 5.521436679  |
| 105378958 | 9.146664356  | 4.9099316 | 7.028297964  | 2.92016921   | 1.510721577  | 4.329616843  |
| 105378978 | 3.969195455  | 3.8943622 | 3.819528982  | -0.3795483   | 6.508720747  | 3.064586224  |
| 105378979 | 5.90029238   | 5.9200251 | 5.880559702  | -0.352108471 | -0.352108471 | -0.352108471 |
| 105379005 | 5.287855205  | 5.0531527 | 5.522557694  | 2.147539136  | 2.147539136  | 2.147539136  |
| 105379010 | 6.369156591  | 6.3831515 | 6.355161685  | -0.352108471 | -0.352108471 | -0.352108471 |
| 105379016 | 6.832218283  | 4.0245695 | 5.428393874  | 4.178899946  | 3.878191396  | 4.479608495  |
| 105379021 | -0.352108471 | -0.352108 | -0.352108471 | 2.252618212  | 2.252618212  | 2.252618212  |
| 105379060 | -0.352108471 | -0.352108 | -0.352108471 | 6.056053999  | 4.82877742   | 7.283330577  |
| 105379072 | 5.656289537  | 5.1945146 | 6.118064495  | 0.872801732  | 0.440372779  | 1.305230684  |
| 105379090 | 3.539717369  | 6.183964  | 8.828210662  | 0.044132154  | -0.352108471 | 0.440372779  |
| 105379100 | -0.352108471 | -0.352108 | -0.352108471 | 2.411083697  | 2.546625611  | 2.682167526  |
| 105379117 | -0.352108471 | -0.352108 | -0.352108471 | 5.529311366  | 6.815591889  | 4.243030843  |
| 105379119 | -0.352108471 | -0.352108 | -0.352108471 | 4.354889986  | 4.79472922   | 5.234568455  |
| 105379126 | -0.352108471 | -0.352108 | -0.352108471 | 3.119148782  | 3.219709646  | 3.018587918  |
| 105379137 | -0.352108471 | -0.352108 | -0.352108471 | 2.515697587  | 5.383503645  | -0.352108471 |
| 105379146 | -0.352108471 | -0.352108 | -0.352108471 | 5.095423988  | 3.696255077  | 6.494592899  |
| 105379165 | 7.711121501  | 8.2047969 | 7.217446092  | 5.07328681   | 4.688318557  | 5.458255064  |
| 105379167 | -0.352108471 | -0.352108 | -0.352108471 | 0.510474327  | 2.481575183  | 4.452676039  |
| 105379177 | 6.870096176  | 7.041464  | 6.698728325  | 3.8113611    | 5.506320168  | 7.201279237  |
| 105379180 | -0.352108471 | -0.352108 | -0.352108471 | 2.625545239  | 1.929530708  | 1.233516178  |
| 105379183 | -0.352108471 | -0.352108 | -0.352108471 | 0.842360745  | 3.119148782  | 5.395936818  |
| 105379200 | 7.129322625  | 7.0425231 | 6.955723541  | -0.352108471 | -0.352108471 | -0.352108471 |
| 105379205 | 6.090808341  | 7.8336728 | 4.347943883  | -0.352108471 | -0.352108471 | -0.352108471 |
| 105379206 | -0.352108471 | -0.352108 | -0.352108471 | 5.923493182  | 5.926961306  | 5.920025058  |
| 105379223 | 8.545455107  | 9.4775239 | 10.40959273  | 8.825256836  | 8.498729794  | 8.661993315  |
| 105379227 | 5.492104853  | 5.2171573 | 5.35463107   | -0.352108471 | -0.352108471 | -0.352108471 |
| 105379250 | 7.491501957  | 6.2125362 | 4.93357046   | -0.352108471 | -0.352108471 | -0.352108471 |
| 105379251 | -0.352108471 | -0.352108 | -0.352108471 | 5.197821579  | 8.60946277   | 6.903642175  |
| 105379252 | -0.352108471 | -0.352108 | -0.352108471 | 5.390930934  | 5.715557343  | 5.066304524  |

|           |              |           |              |              |              |              |
|-----------|--------------|-----------|--------------|--------------|--------------|--------------|
| 105379256 | -0.352108471 | -0.352108 | -0.352108471 | 4.353126573  | 5.27665889   | 4.814892732  |
| 105379279 | 2.642407329  | 6.5944666 | 4.618436987  | -0.352108471 | -0.352108471 | -0.352108471 |
| 105379288 | -0.352108471 | -0.352108 | -0.352108471 | 6.433682579  | 6.918655486  | 6.676169033  |
| 105379291 | -0.352108471 | -0.352108 | -0.352108471 | 3.024357264  | 3.213940299  | 3.119148782  |
| 105379301 | 2.588601447  | 5.5293114 | -0.352108471 | -0.352108471 | -0.352108471 | -0.352108471 |
| 105379302 | 5.523239719  | 5.6573174 | 5.389162088  | -0.352108471 | -0.352108471 | -0.352108471 |
| 105379311 | 6.242048279  | 6.2558778 | 6.228218771  | -0.352108471 | -0.352108471 | -0.352108471 |
| 105379356 | 7.990771225  | 5.4344397 | 2.878108208  | -0.352108471 | -0.352108471 | -0.352108471 |
| 105379361 | 6.96369403   | 5.4851236 | 4.006553188  | -0.352108471 | -0.352108471 | -0.352108471 |
| 105379364 | 7.003358054  | 6.1555609 | 6.579459461  | 0.86953393   | 0.808855576  | 0.930212283  |
| 105379365 | -0.352108471 | -0.352108 | -0.352108471 | 4.613083451  | 5.210216965  | 4.911650208  |
| 105379369 | -0.352108471 | -0.352108 | -0.352108471 | 7.803705017  | 4.971504216  | 2.139303415  |
| 105379377 | -0.352108471 | -0.352108 | -0.352108471 | 8.849990258  | 6.022050925  | 3.194111592  |
| 105379398 | -0.352108471 | -0.352108 | -0.352108471 | 2.492032424  | 5.336173319  | -0.352108471 |
| 105379405 | 2.351086241  | -0.352108 | 5.054280952  | -0.352108471 | -0.352108471 | -0.352108471 |
| 105379406 | -0.352108471 | -0.352108 | -0.352108471 | 5.662971356  | 5.97985032   | 5.821410838  |
| 105379408 | 4.730615771  | 4.5722278 | 4.88900371   | 3.228447668  | 3.337746555  | 3.119148782  |
| 105379413 | 5.049130657  | 7.1924906 | 6.120810648  | -0.352108471 | -0.352108471 | -0.352108471 |
| 105379418 | -0.352108471 | -0.352108 | -0.352108471 | 5.465839294  | 4.123619146  | 4.79472922   |
| 105379420 | 7.450449055  | 7.4583733 | 7.442524773  | -0.352108471 | -0.352108471 | -0.352108471 |
| 105379422 | 4.493470537  | 6.0203811 | 7.547291646  | 3.239272365  | 5.637738742  | 4.438505554  |
| 105379423 | 5.633937955  | 7.6532016 | 9.67246524   | 6.54435867   | 6.630837149  | 6.717315627  |
| 105379431 | -0.352108471 | -0.352108 | -0.352108471 | 4.456886199  | 4.482692559  | 4.43107984   |
| 105379440 | 2.84317252   | -0.352108 | 6.038453511  | -0.352108471 | -0.352108471 | -0.352108471 |
| 105379443 | 5.38967036   | 5.9875749 | 5.688622647  | -0.352108471 | -0.352108471 | -0.352108471 |
| 105379448 | 7.506677825  | 7.508442  | 7.504913637  | -0.352108471 | -0.352108471 | -0.352108471 |
| 105379467 | -0.352108471 | -0.352108 | -0.352108471 | 2.43016825   | 2.110900477  | 2.749436024  |
| 105379477 | 5.509495557  | 5.2437595 | 5.775231583  | 3.046836295  | 5.653299811  | 0.440372779  |
| 105379494 | 5.871254895  | 6.3439771 | 5.398532684  | -0.352108471 | -0.352108471 | -0.352108471 |
| 105379498 | -0.352108471 | -0.352108 | -0.352108471 | 2.501526031  | -0.352108471 | 5.355160532  |
| 105379516 | 6.151585628  | 7.7119342 | 4.59123706   | 2.076022254  | 1.300422222  | 2.851622287  |
| 105379520 | 6.739149467  | 6.6898785 | 6.788420481  | 6.147741192  | 6.101634422  | 6.193847962  |
| 105379523 | 7.664080745  | 6.1848209 | 4.705561142  | 8.305949299  | 4.97239442   | 6.63917186   |
| 105379527 | 3.582547382  | 5.0799713 | 6.577395312  | 0.044132154  | -0.352108471 | 0.440372779  |
| 105379536 | 5.522595798  | 5.0342263 | 6.010965254  | -0.352108471 | -0.352108471 | -0.352108471 |
| 105379547 | 5.745480655  | 6.9166391 | 6.331059877  | 6.571174876  | 5.233893299  | 5.902534088  |
| 105379549 | 6.294619744  | 5.6024012 | 6.986838314  | 5.695475335  | 6.087644454  | 6.479813574  |
| 105379551 | 7.155086519  | 6.448541  | 6.801813774  | -0.352108471 | -0.352108471 | -0.352108471 |
| 105379554 | -0.352108471 | -0.352108 | -0.352108471 | 1.842407068  | 1.807952763  | 1.876861374  |
| 105379555 | -0.352108471 | -0.352108 | -0.352108471 | 5.322153946  | 6.086516564  | 5.704335255  |
| 105379557 | 2.934655352  | 2.4868796 | 2.03910383   | -0.352108471 | -0.352108471 | -0.352108471 |
| 105379564 | 6.216915331  | 6.9675112 | 7.718107158  | -0.352108471 | -0.352108471 | -0.352108471 |
| 105379581 | -0.352108471 | -0.352108 | -0.352108471 | 1.979372981  | 2.444513457  | 2.211943219  |
| 105379587 | 5.652271474  | 6.6593365 | 4.645206473  | 7.09094637   | 5.784960503  | 4.478974636  |
| 105379615 | 4.97352783   | 5.3152588 | 4.631796822  | -0.352108471 | -0.352108471 | -0.352108471 |
| 105379629 | 4.744327548  | 4.4173531 | 4.090378577  | -0.352108471 | -0.352108471 | -0.352108471 |
| 105379661 | -0.352108471 | -0.352108 | -0.352108471 | 6.105008867  | 4.66005769   | 3.215106512  |

|           |              |           |              |              |              |              |
|-----------|--------------|-----------|--------------|--------------|--------------|--------------|
| 105379676 | 5.428393874  | 6.0814598 | 4.775327955  | -0.352108471 | -0.352108471 | -0.352108471 |
| 105379679 | -0.352108471 | -0.352108 | -0.352108471 | 3.182489739  | 6.13762564   | 4.66005769   |
| 105379680 | 4.367830071  | 3.6642615 | 4.016045771  | 5.579094101  | 6.533013897  | 6.056053999  |
| 105379687 | 1.551874638  | 1.2151657 | 1.383520155  | 4.811096552  | 4.706961556  | 4.60282656   |
| 105379689 | 5.493783215  | 6.9577196 | 4.029846782  | 5.245661134  | 2.919059086  | 4.08236011   |
| 105379702 | 6.293623131  | 4.3347012 | 2.375779346  | -0.352108471 | -0.352108471 | -0.352108471 |
| 105379715 | -0.352108471 | -0.352108 | -0.352108471 | 5.295078103  | 5.712273256  | 4.87788295   |
| 105379724 | 7.882101328  | 6.9163731 | 8.84782955   | 7.178690343  | 5.453994843  | 3.729299344  |
| 105379728 | 5.937827329  | 7.842619  | 4.033035626  | -0.352108471 | -0.352108471 | -0.352108471 |
| 105379734 | 4.287526266  | 4.2109961 | 4.249261192  | 8.228687422  | 4.363400309  | 6.296043865  |
| 105379742 | 0.425291339  | 4.537859  | 2.481575183  | 3.03914168   | 2.397492216  | 1.755842753  |
| 105379748 | 7.688088734  | 5.980334  | 4.272579322  | -0.352108471 | -0.352108471 | -0.352108471 |
| 105379752 | -0.352108471 | -0.352108 | -0.352108471 | 3.119148782  | 3.893819184  | 2.344478379  |
| 105379756 | 6.572931339  | 5.8001998 | 5.027468236  | 2.094444132  | 1.997577452  | 2.191310813  |
| 105379760 | 6.416357783  | 7.7695198 | 5.063195737  | -0.352108471 | -0.352108471 | -0.352108471 |
| 105379767 | 5.899362839  | 5.8369584 | 5.774553889  | -0.352108471 | -0.352108471 | -0.352108471 |
| 105379768 | 2.558401675  | 6.3410962 | 4.449748927  | 6.223209964  | 3.963030129  | 5.093120047  |
| 105379792 | 6.720370627  | 6.7508628 | 6.689878453  | -0.352108471 | -0.352108471 | -0.352108471 |
| 105379799 | -0.352108471 | -0.352108 | -0.352108471 | 4.66005769   | 4.688318557  | 4.631796822  |
| 105379803 | -0.352108471 | -0.352108 | -0.352108471 | 5.077914249  | 4.477947052  | 3.877979854  |
| 105379806 | 7.650334664  | 6.8469571 | 6.04357953   | 3.73714403   | 5.042654972  | 2.431633088  |
| 105379807 | 1.492879131  | 4.1573211 | 2.8251001    | -0.352108471 | -0.352108471 | -0.352108471 |
| 105379808 | -0.352108471 | -0.352108 | -0.352108471 | 5.88700099   | 6.943528322  | 4.830473658  |
| 105379809 | 7.184663343  | 5.5765095 | 8.792817219  | 5.11458226   | 4.600497609  | 4.857539934  |
| 105379816 | 2.588601447  | -0.352108 | 5.529311366  | 1.76984594   | 1.807952763  | 1.731739118  |
| 105379818 | 4.992568101  | 5.4424142 | 5.217491139  | 5.993376219  | 8.812718376  | 7.403047298  |
| 105379819 | 10.59963574  | 9.1599607 | 7.720285641  | 8.092037136  | 6.77374078   | 5.455444424  |
| 105379822 | -0.352108471 | -0.352108 | -0.352108471 | 0.949604797  | 4.637194169  | 8.32478354   |
| 105379826 | -0.352108471 | -0.352108 | -0.352108471 | 5.458255064  | 7.859500965  | 3.057009163  |
| 105379833 | -0.352108471 | -0.352108 | -0.352108471 | 4.456886199  | 6.055883089  | 2.85788931   |
| 105379834 | 5.836275906  | 4.5750389 | 3.313801928  | 4.66005769   | 6.667586145  | 2.652529234  |
| 105379838 | 4.598204327  | 4.6565592 | 4.714914154  | 3.245625856  | 3.337746555  | 3.153505157  |
| 105379848 | 5.689216459  | 5.980334  | 6.271451597  | 4.976042035  | 1.969230181  | 7.982853889  |
| 105379853 | 4.943335066  | 6.519674  | 8.096012849  | 0.395051519  | 1.14221151   | -0.352108471 |
| 105379854 | -0.352108471 | -0.352108 | -0.352108471 | 5.44897977   | 5.494417177  | 5.403542364  |
| 105379861 | 5.800199788  | 5.3020742 | 6.298325346  | -0.352108471 | -0.352108471 | -0.352108471 |
| 105379862 | 6.720370627  | 5.8221214 | 7.618619828  | 6.101164691  | 5.284974356  | 4.468784021  |
| 105379880 | 6.77374078   | 6.7884205 | 6.759061079  | 6.105896993  | 6.246629235  | 5.965164752  |
| 105379881 | -0.352108471 | -0.352108 | -0.352108471 | 4.617117504  | 5.417155367  | 5.017136436  |
| 105747689 | 5.564591206  | 4.4504318 | 6.678750612  | 8.729582432  | 6.795027168  | 4.860471904  |
| 105748977 | 7.136372074  | 6.1796743 | 6.658023207  | -0.352108471 | -0.352108471 | -0.352108471 |
| 106182249 | 4.731111372  | 4.8304259 | 4.631796822  | 4.977710418  | 5.054280952  | 4.901139884  |
| 106478957 | 4.455779276  | 4.9170441 | 3.994514455  | 0.689815323  | -0.352108471 | 1.731739118  |
| 106478991 | 5.718716224  | 4.0451438 | 7.392288636  | 5.305586236  | 5.326967336  | 5.316276786  |
| 106614088 | 5.915852686  | 6.6003588 | 5.231346598  | 5.284336357  | 6.114004174  | 4.45466854   |
| 106635544 | 7.112826218  | 1.051894  | 4.08236011   | 4.973858514  | 5.222210236  | 5.470561958  |
| 106660613 | -0.352108471 | -0.352108 | -0.352108471 | 4.777811646  | -0.352108471 | 1.930583232  |

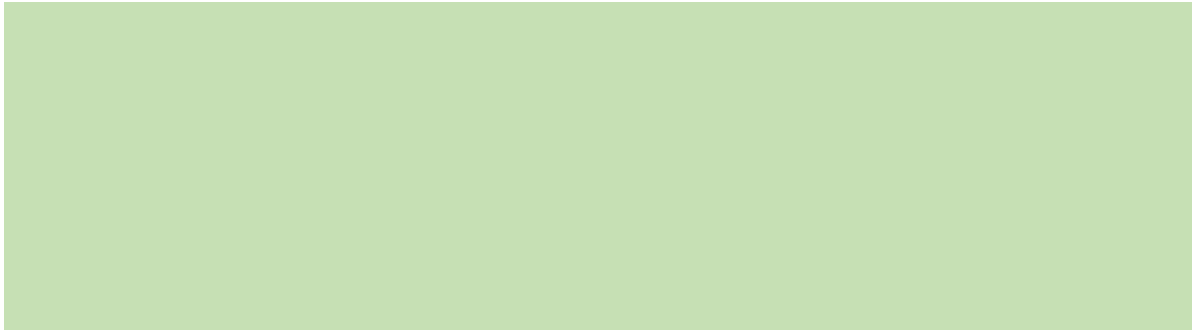

Supplement: s1 [file s1]
