# Supplementary material for: Cytogenetic and Transcriptomic Analysis of Human Endometrial MSC Retaining Proliferative Activity after Sublethal Heat Shock
Source: MDPI journal article supplement (doi:10.3390/cells7110184), 2018-10-25
Supplement: s1 [file s1]

**Supplementary Table 4. The pathways enriched in switched-on DNA repair genes.**

GeneN - the observed number of genes belonging to a pathway in the switched-on genes.

Ratio - the ratio of observed to expected numbers of genes belonging to a pathway in the switched-on genes.

| Pathway ID                       | Pathway Name                                              | GeneN | Ratio | p-value  | q-value  | Gene list                                                                                                                                                                                                                                                                                   |
|----------------------------------|-----------------------------------------------------------|-------|-------|----------|----------|---------------------------------------------------------------------------------------------------------------------------------------------------------------------------------------------------------------------------------------------------------------------------------------------|
| 1309111__REACTOME__R-HSA-5696398 | Nucleotide Excision Repair                                | 34    | 29.87 | 1.69E-43 | 2.60E-40 | PARP1; POLR2A; COPS6; POLE4; SUMO3; RAD23A; RFC1; POLR2H; POLR2J; ERCC2; UBE2I; UBE2V2; POLD3; COPS3; POLE; COPS8; POLR2K; CHD1L; HMGN1; SUMO2; COPS2; RPA2; YY1; TCEA1; SUMO1; POLR2F; ERCC3; RUVBL1; TFPT; RPA1; PCNA; PIAS3; CCNH; POLK                                                  |
| 1268743__REACTOME__R-HSA-3108232 | SUMO E3 ligases SUMOylate target proteins                 | 29    | 27.35 | 1.26E-35 | 9.70E-33 | PARP1; SUMO3; RING1; PML; PHC1; UBE2I; POM121C; TP53BP1; TPR; TDG; XRCC4; RANBP2; NUP153; CDKN2A; SCMH1; SUMO2; NUP85; PHC2; NDC1; SUMO1; NUP88; SMC1A; RAD21; SMC3; NUP62; RPA1; PCNA; PIAS3; PIAS2                                                                                        |
| 1268744__REACTOME__R-HSA-3108214 | SUMOylation of DNA damage response and repair proteins    | 26    | 34.73 | 1.59E-35 | 9.80E-33 | PARP1; SUMO3; RING1; PML; PHC1; UBE2I; POM121C; TPR; TDG; XRCC4; RANBP2; NUP153; CDKN2A; SCMH1; SUMO2; NUP85; PHC2; NDC1; SUMO1; NUP88; SMC1A; RAD21; SMC3; NUP62; RPA1; PIAS2                                                                                                              |
| 1309112__REACTOME__R-HSA-5696399 | Global Genome Nucleotide Excision Repair (GG-NER)         | 27    | 30.92 | 4.95E-35 | 2.54E-32 | PARP1; COPS6; POLE4; SUMO3; RAD23A; RFC1; ERCC2; UBE2I; UBE2V2; POLD3; COPS3; POLE; COPS8; CHD1L; SUMO2; COPS2; RPA2; YY1; SUMO1; ERCC3; RUVBL1; TFPT; RPA1; PCNA; PIAS3; CCNH; POLK                                                                                                        |
| 1268738__REACTOME__R-HSA-2990846 | SUMOylation                                               | 29    | 25.83 | 9.99E-35 | 4.40E-32 | PARP1; SUMO3; RING1; PML; PHC1; UBE2I; POM121C; TP53BP1; TPR; TDG; XRCC4; RANBP2; NUP153; CDKN2A; SCMH1; SUMO2; NUP85; PHC2; NDC1; SUMO1; NUP88; SMC1A; RAD21; SMC3; NUP62; RPA1; PCNA; PIAS3; PIAS2                                                                                        |
| 1309117__REACTOME__R-HSA-6781827 | Transcription-Coupled Nucleotide Excision Repair (TC-NER) | 22    | 26.12 | 1.46E-26 | 5.01E-24 | POLR2A; COPS6; POLE4; RFC1; POLR2H; POLR2J; ERCC2; POLD3; COPS3; POLE; COPS8; POLR2K; HMGN1; COPS2; RPA2; TCEA1; POLR2F; ERCC3; RPA1; PCNA; CCNH; POLK                                                                                                                                      |
| 1269741__REACTOME__R-HSA-1640170 | Cell Cycle                                                | 41    | 7.34  | 3.74E-25 | 1.15E-22 | RUVBL2; POLE4; RFC1; MCM7; TUBA4A; MCM5; UBE2I; UBE2V2; FOXM1; POM121C; POLD3; CDC25C; POLE; TP53BP1; TPR; RANBP2; NUP153; CDKN2A; CDC45; RMI2; MCM3; NUP85; RPA2; NDC1; SUMO1; NUP88; TOPBP1; SMC1A; RAD21; RUVBL1; RHNO1; PTTG1; SMC3; NUP62; RBBP8; UIMC1; KAT5; RPA1; PCNA; CDCA5; CCNH |
| 1309120__REACTOME__R-HSA-6782210 | Gap-filling DNA repair synthesis and ligation in TC-NER   | 18    | 26.23 | 6.57E-22 | 1.56E-19 | POLR2A; POLE4; RFC1; POLR2H; POLR2J; ERCC2; POLD3; POLE; POLR2K; HMGN1; RPA2; TCEA1; POLR2F; ERCC3; RPA1; PCNA; CCNH; POLK                                                                                                                                                                  |
| 1309119__REACTOME__R-HSA-6782135 | Dual incision in TC-NER                                   | 18    | 25.65 | 1.08E-21 | 2.38E-19 | POLR2A; POLE4; RFC1; POLR2H; POLR2J; ERCC2; POLD3; POLE; POLR2K; HMGN1; RPA2; TCEA1; POLR2F; ERCC3; RPA1; PCNA; CCNH; POLK                                                                                                                                                                  |

|                                                |                                            |    |       |          |          |                                                                                                                                                                                                                                                                           |
|------------------------------------------------|--------------------------------------------|----|-------|----------|----------|---------------------------------------------------------------------------------------------------------------------------------------------------------------------------------------------------------------------------------------------------------------------------|
| 1339112__REACTOME__R-HSA-4570464               | SUMOylation of RNA binding proteins        | 15 | 33.17 | 2.23E-20 | 4.31E-18 | RING1; PHC1; UBE2I; POM121C; TPR; RANBP2; NUP153; SCMH1; SUMO2; NUP85; PHC2; NDC1; SUMO1; NUP88; NUP62                                                                                                                                                                    |
| 1309114__REACTOME__R-HSA-5696395               | Formation of Incision Complex in GG-NER    | 14 | 29.92 | 2.92E-18 | 5.30E-16 | PARP1; SUMO3; RAD23A; ERCC2; UBE2I; UBE2V2; CHD1L; SUMO2; RPA2; SUMO1; ERCC3; RPA1; PIAS3; CCNH                                                                                                                                                                           |
| 1339113__REACTOME__R-HSA-4615885               | SUMOylation of DNA replication proteins    | 14 | 28.96 | 5.26E-18 | 9.01E-16 | SUMO3; UBE2I; POM121C; TPR; RANBP2; NUP153; SUMO2; NUP85; NDC1; SUMO1; NUP88; NUP62; PCNA; PIAS3                                                                                                                                                                          |
| 1269058__REACTOME__R-HSA-162587                | HIV Life Cycle                             | 20 | 12.95 | 2.52E-17 | 4.09E-15 | POLR2A; POLR2H; POLR2J; ERCC2; POM121C; POLR2K; TPR; XRCC4; RANBP2; NUP153; NUP85; NDC1; TCEA1; NUP88; POLR2F; ERCC3; SSRP1; NUP62; SUPT16H; CCNH                                                                                                                         |
| 1269117__REACTOME__R-HSA-168325                | Viral Messenger RNA Synthesis              | 13 | 29.77 | 5.41E-17 | 8.16E-15 | POLR2A; POLR2H; POLR2J; POM121C; POLR2K; TPR; RANBP2; NUP153; NUP85; NDC1; NUP88; POLR2F; NUP62                                                                                                                                                                           |
| 1269069__REACTOME__R-HSA-162599                | Late Phase of HIV Life Cycle               | 19 | 13.69 | 5.56E-17 | 8.16E-15 | POLR2A; POLR2H; POLR2J; ERCC2; POM121C; POLR2K; TPR; RANBP2; NUP153; NUP85; NDC1; TCEA1; NUP88; POLR2F; ERCC3; SSRP1; NUP62; SUPT16H; CCNH                                                                                                                                |
| 470351__KEGG__hsa_M00427; 890636__KEGG__M00427 | Nuclear pore complex                       | 12 | 34.98 | 7.03E-17 | 9.87E-15 | SUMO3; UBE2I; POM121C; TPR; RANBP2; NUP153; SUMO2; NUP85; NDC1; SUMO1; NUP88; NUP62                                                                                                                                                                                       |
| 1309101__REACTOME__R-HSA-5693607               | Processing of DNA double-strand break ends | 15 | 20.91 | 1.18E-16 | 1.58E-14 | PPP4C; UBE2I; UBE2V2; TP53BP1; RMI2; SUMO2; RPA2; SUMO1; TOPBP1; RNF4; RHNO1; RBBP8; UIMC1; KAT5; RPA1                                                                                                                                                                    |
| 1309118__REACTOME__R-HSA-6781823               | Formation of TC-NER Pre-Incision Complex   | 14 | 21.90 | 6.13E-16 | 7.56E-14 | POLR2A; COPS6; POLR2H; POLR2J; ERCC2; COPS3; COPS8; POLR2K; HMG1; COPS2; TCEA1; POLR2F; ERCC3; CCNH                                                                                                                                                                       |
| 1269763__REACTOME__R-HSA-69278                 | Cell Cycle, Mitotic                        | 29 | 6.30  | 6.84E-16 | 8.11E-14 | POLE4; RFC1; MCM7; TUBA4A; MCM5; FOXM1; POM121C; POLD3; CDC25C; POLE; TPR; RANBP2; NUP153; CDKN2A; CDC45; MCM3; NUP85; RPA2; NDC1; NUP88; SMC1A; RAD21; PTTG1; SMC3; NUP62; RPA1; PCNA; CDCA5; CCNH                                                                       |
| 1268701__REACTOME__R-HSA-597592                | Post-translational protein modification    | 39 | 4.30  | 1.36E-15 | 1.56E-13 | PARP1; SUMO3; RING1; RAD23A; PML; USP47; UBE2A; PHC1; UBE2I; TRIM25; POM121C; USP28; TP53BP1; TPR; TDG; XRCC4; RANBP2; NUP153; CDKN2A; SCMH1; BAP1; SUMO2; NUP85; PHC2; NDC1; YY1; SUMO1; NUP88; SMC1A; RAD21; RUVBL1; SMC3; NUP62; UIMC1; TFPT; RPA1; PCNA; PIAS3; PIAS2 |
| 1269723__REACTOME__R-HSA-5578749               | Transcriptional regulation by small RNAs   | 13 | 23.82 | 1.95E-15 | 2.15E-13 | POLR2A; POLR2H; POLR2J; POM121C; POLR2K; TPR; RANBP2; NUP153; NUP85; NDC1; NUP88; POLR2F; NUP62                                                                                                                                                                           |
| 1309115__REACTOME__R-HSA-5696400               | Dual Incision in GG-NER                    | 12 | 27.48 | 3.06E-15 | 3.25E-13 | PARP1; POLE4; RFC1; ERCC2; POLD3; POLE; CHD1L; RPA2; ERCC3; RPA1; PCNA; POLK                                                                                                                                                                                              |
| 1270374__REACTOME__R-HSA-5656169               | Termination of translesion DNA synthesis   | 11 | 29.39 | 1.82E-14 | 1.88E-12 | POLE4; UBE2L6; RFC1; TRIM25; POLD3; POLE; REV1; RPA2; RPA1; PCNA; POLK                                                                                                                                                                                                    |

|                                                                                                         |                                                                                                                                           |    |       |          |          |                                                                                                                                                                         |
|---------------------------------------------------------------------------------------------------------|-------------------------------------------------------------------------------------------------------------------------------------------|----|-------|----------|----------|-------------------------------------------------------------------------------------------------------------------------------------------------------------------------|
| 1270351__REACTOME__R-HSA-73884;<br>1270359__REACTOME__R-HSA-73933                                       | Base Excision Repair;<br>Resolution of Abasic Sites (AP sites)                                                                            | 10 | 35.62 | 2.37E-14 | 2.36E-12 | PARP1; POLE4; RFC1; POLD3; POLE; TDG; PNKP; RPA2; RPA1; PCNA                                                                                                            |
| 452__KEGG__ko03420;<br>83044__KEGG__hsa03420                                                            | Nucleotide excision repair                                                                                                                | 11 | 27.13 | 5.50E-14 | 5.14E-12 | POLE4; RAD23A; RFC1; ERCC2; POLD3; POLE; RPA2; ERCC3; RPA1; PCNA; CCNH                                                                                                  |
| 1269777__REACTOME__R-HSA-69242                                                                          | S Phase                                                                                                                                   | 16 | 12.07 | 1.53E-13 | 1.39E-11 | POLE4; RFC1; MCM7; MCM5; POLD3; POLE; CDC45; MCM3; RPA2; SMC1A; RAD21; SMC3; RPA1; PCNA; CDCA5; CCNH                                                                    |
| 1269719__REACTOME__R-HSA-211000                                                                         | Gene Silencing by RNA                                                                                                                     | 13 | 17.74 | 1.58E-13 | 1.40E-11 | POLR2A; POLR2H; POLR2J; POM121C; POLR2K; TPR; RANBP2; NUP153; NUP85; NDC1; NUP88; POLR2F; NUP62                                                                         |
| 1270367__REACTOME__R-HSA-73893                                                                          | DNA Damage Bypass                                                                                                                         | 12 | 20.80 | 1.65E-13 | 1.42E-11 | POLE4; UBE2L6; RFC1; TRIM25; POLD3; POLE; REV1; DTL; RPA2; RPA1; PCNA; POLK                                                                                             |
| 444__KEGG__ko03030;<br>83039__KEGG__hsa03030                                                            | DNA replication                                                                                                                           | 10 | 30.53 | 1.84E-13 | 1.53E-11 | POLE4; RFC1; MCM7; MCM5; POLD3; POLE; MCM3; RPA2; RPA1; PCNA                                                                                                            |
| 1269654__REACTOME__R-HSA-3700989                                                                        | Transcriptional Regulation by TP53                                                                                                        | 24 | 6.39  | 2.28E-13 | 1.85E-11 | POLR2A; PML; POLR2H; POLR2J; ERCC2; CDC25C; POLR2K; CDKN2A; RMI2; FANCI; RPA2; TCEA1; TOPBP1; POLR2F; ERCC3; RHNO1; TTC5; SSRP1; RBBP8; SUPT16H; KAT5; RPA1; PCNA; CCNH |
| 1270369__REACTOME__R-HSA-110313                                                                         | Translesion synthesis by Y family DNA polymerases bypasses lesions on DNA template                                                        | 11 | 24.32 | 2.37E-13 | 1.87E-11 | POLE4; UBE2L6; RFC1; TRIM25; POLD3; POLE; REV1; RPA2; RPA1; PCNA; POLK                                                                                                  |
| 1269057__REACTOME__R-HSA-162906                                                                         | HIV Infection                                                                                                                             | 20 | 8.07  | 3.43E-13 | 2.65E-11 | POLR2A; POLR2H; POLR2J; ERCC2; POM121C; POLR2K; TPR; XRCC4; RANBP2; NUP153; NUP85; NDC1; TCEA1; NUP88; POLR2F; ERCC3; SSRP1; NUP62; SUPT16H; CCNH                       |
| 1269857__REACTOME__R-HSA-180786                                                                         | Extension of Telomeres                                                                                                                    | 9  | 33.95 | 9.05E-13 | 6.81E-11 | RUVBL2; POLE4; RFC1; POLD3; POLE; RPA2; RUVBL1; RPA1; PCNA                                                                                                              |
| 1269074__REACTOME__R-HSA-167169;<br>1269076__REACTOME__R-HSA-167246;<br>1269077__REACTOME__R-HSA-167200 | HIV Transcription Elongation; Tat-mediated elongation of the HIV-1 transcript; Formation of HIV-1 elongation complex containing HIV-1 Tat | 11 | 21.37 | 1.26E-12 | 9.22E-11 | POLR2A; POLR2H; POLR2J; ERCC2; POLR2K; TCEA1; POLR2F; ERCC3; SSRP1; SUPT16H; CCNH                                                                                       |
| 1383075__REACTOME__R-HSA-6796648                                                                        | TP53 Regulates Transcription of DNA Repair Genes                                                                                          | 12 | 17.49 | 1.72E-12 | 1.20E-10 | POLR2A; POLR2H; POLR2J; ERCC2; POLR2K; FANCI; TCEA1; POLR2F; ERCC3; SSRP1; SUPT16H; CCNH                                                                                |

|                                                                    |                                                                                                           |    |       |          |          |                                                                                                              |
|--------------------------------------------------------------------|-----------------------------------------------------------------------------------------------------------|----|-------|----------|----------|--------------------------------------------------------------------------------------------------------------|
| 1269080__REACTOME__R-HSA-167152                                    | Formation of HIV elongation complex in the absence of HIV Tat                                             | 11 | 20.75 | 1.83E-12 | 1.26E-10 | POLR2A; POLR2H; POLR2J; ERCC2; POLR2K; TCEA1; POLR2F; ERCC3; SSRP1; SUPT16H; CCNH                            |
| 1269754__REACTOME__R-HSA-69473                                     | G2/M DNA damage checkpoint                                                                                | 12 | 17.10 | 2.31E-12 | 1.55E-10 | UBE2V2; CDC25C; TP53BP1; RMI2; RPA2; SUMO1; TOPBP1; RHNO1; RBBP8; UIMC1; KAT5; RPA1                          |
| 198771__WikiPathways__WP466                                        | DNA Replication                                                                                           | 10 | 24.66 | 2.59E-12 | 1.70E-10 | RFC1; MCM7; MCM5; POLD3; POLE; CDC45; MCM3; RPA2; RPA1; PCNA                                                 |
| 1269753__REACTOME__R-HSA-69481                                     | G2/M Checkpoints                                                                                          | 16 | 10.06 | 2.96E-12 | 1.90E-10 | MCM7; MCM5; UBE2V2; CDC25C; TP53BP1; CDC45; RMI2; MCM3; RPA2; SUMO1; TOPBP1; RHNO1; RBBP8; UIMC1; KAT5; RPA1 |
| 1269784__REACTOME__R-HSA-69190                                     | DNA strand elongation                                                                                     | 9  | 30.37 | 3.35E-12 | 2.11E-10 | RFC1; MCM7; MCM5; POLD3; CDC45; MCM3; RPA2; RPA1; PCNA                                                       |
| 1270364__REACTOME__R-HSA-110373                                    | Resolution of AP sites via the multiple-nucleotide patch replacement pathway                              | 8  | 36.64 | 7.84E-12 | 4.74E-10 | PARP1; POLE4; RFC1; POLD3; POLE; RPA2; RPA1; PCNA                                                            |
| 1269682__REACTOME__R-HSA-75955;<br>1269684__REACTOME__R-HSA-112382 | RNA Polymerase II Transcription Elongation;<br>Formation of RNA Pol II elongation complex                 | 11 | 17.20 | 1.85E-11 | 1.10E-09 | POLR2A; POLR2H; POLR2J; ERCC2; POLR2K; TCEA1; POLR2F; ERCC3; SSRP1; SUPT16H; CCNH                            |
| 1309116__REACTOME__R-HSA-5696397                                   | Gap-filling DNA repair synthesis and ligation in GG-NER                                                   | 8  | 32.06 | 3.27E-11 | 1.87E-09 | POLE4; RFC1; POLD3; POLE; RPA2; RPA1; PCNA; POLK                                                             |
| 1269922__REACTOME__R-HSA-170822                                    | Regulation of Glucokinase by Glucokinase Regulatory Protein                                               | 8  | 32.06 | 3.27E-11 | 1.87E-09 | POM121C; TPR; RANBP2; NUP153; NUP85; NDC1; NUP88; NUP62                                                      |
| 1309098__REACTOME__R-HSA-5693565                                   | Recruitment and ATM-mediated phosphorylation of repair and signaling proteins at DNA double strand breaks | 10 | 19.43 | 4.11E-11 | 2.31E-09 | PPP5C; UBE2I; UBE2V2; TP53BP1; BAP1; SUMO1; EYA2; EYA4; UIMC1; KAT5                                          |
| 1269742__REACTOME__R-HSA-69620                                     | Cell Cycle Checkpoints                                                                                    | 16 | 8.48  | 4.35E-11 | 2.40E-09 | MCM7; MCM5; UBE2V2; CDC25C; TP53BP1; CDC45; RMI2; MCM3; RPA2; SUMO1; TOPBP1; RHNO1; RBBP8; UIMC1; KAT5; RPA1 |
| 1269856__REACTOME__R-HSA-157579                                    | Telomere Maintenance                                                                                      | 9  | 24.05 | 4.44E-11 | 2.40E-09 | RUVBL2; POLE4; RFC1; POLD3; POLE; RPA2; RUVBL1; RPA1; PCNA                                                   |
| 1309096__REACTOME__R-HSA-5693606                                   | DNA Double Strand Break Response                                                                          | 10 | 18.86 | 5.75E-11 | 3.06E-09 | PPP5C; UBE2I; UBE2V2; TP53BP1; BAP1; SUMO1; EYA2; EYA4; UIMC1; KAT5                                          |

|                                              |                                                       |    |       |          |          |                                                                                                                                                                                                                                                                                                  |
|----------------------------------------------|-------------------------------------------------------|----|-------|----------|----------|--------------------------------------------------------------------------------------------------------------------------------------------------------------------------------------------------------------------------------------------------------------------------------------------------|
| 1268677__REACTOME__R-HSA-392499              | Metabolism of proteins                                | 42 | 2.91  | 5.85E-11 | 3.06E-09 | PARP1; SUMO3; RING1; RAD23A; UBE2L6; PML; USP47; UBE2A; TUBA4A; PHC1; UBE2I; TRIM25; POM121C; USP28; TP53BP1; TPR; TDG; XRCC4; RANBP2; NUP153; CDKN2A; SCMH1; BAP1; SUMO2; NUP85; PHC2; NDC1; YY1; SUMO1; NUP88; SMC1A; RAD21; RUVBL1; SMC3; NUP62; UIMC1; TFPT; RPA1; PCNA; PIAS3; PIAS2; FBXO6 |
| 451__KEGG__ko03410;<br>83043__KEGG__hsa03410 | Base excision repair                                  | 8  | 30.18 | 6.10E-11 | 3.14E-09 | PARP1; POLE4; POLL; POLD3; POLE; NEIL3; TDG; PCNA                                                                                                                                                                                                                                                |
| 198917__WikiPathways__WP405                  | Eukaryotic Transcription Initiation                   | 9  | 23.08 | 6.85E-11 | 3.46E-09 | POLR2A; POLR2H; POLR2J; ERCC2; POLR2K; POLR2F; ERCC3; POLR3K; CCNH                                                                                                                                                                                                                               |
| 1269650__REACTOME__R-HSA-212436              | Generic Transcription Pathway                         | 29 | 3.98  | 8.61E-11 | 4.29E-09 | PARP1; POLR2A; PML; POLR2H; POLR2J; ERCC2; UBE2I; CDC25C; POLR2K; CDKN2A; RMI2; FANCI; RPA2; YY1; TCEA1; SUMO1; MEN1; TOPBP1; POLR2F; ERCC3; RHNO1; TTC5; SSRP1; RBBP8; SUPT16H; KAT5; RPA1; PCNA; CCNH                                                                                          |
| 1269070__REACTOME__R-HSA-167172              | Transcription of the HIV genome                       | 11 | 15.01 | 9.40E-11 | 4.60E-09 | POLR2A; POLR2H; POLR2J; ERCC2; POLR2K; TCEA1; POLR2F; ERCC3; SSRP1; SUPT16H; CCNH                                                                                                                                                                                                                |
| 1269123__REACTOME__R-HSA-168333              | NEP/NS2 Interacts with the Cellular Export Machinery  | 8  | 28.50 | 1.08E-10 | 5.07E-09 | POM121C; TPR; RANBP2; NUP153; NUP85; NDC1; NUP88; NUP62                                                                                                                                                                                                                                          |
| 1269114__REACTOME__R-HSA-168271              | Transport of Ribonucleoproteins into the Host Nucleus | 8  | 28.50 | 1.08E-10 | 5.07E-09 | POM121C; TPR; RANBP2; NUP153; NUP85; NDC1; NUP88; NUP62                                                                                                                                                                                                                                          |
| 1269121__REACTOME__R-HSA-168274              | Export of Viral Ribonucleoproteins from Nucleus       | 8  | 28.50 | 1.08E-10 | 5.07E-09 | POM121C; TPR; RANBP2; NUP153; NUP85; NDC1; NUP88; NUP62                                                                                                                                                                                                                                          |
| 1309113__REACTOME__R-HSA-5696394             | DNA Damage Recognition in GG-NER                      | 9  | 20.61 | 2.23E-10 | 1.01E-08 | PARP1; COPS6; RAD23A; COPS3; COPS8; COPS2; YY1; RUVBL1; TFPT                                                                                                                                                                                                                                     |
| 1270366__REACTOME__R-HSA-5651801             | PCNA-Dependent Long Patch Base Excision Repair        | 7  | 34.53 | 3.03E-10 | 1.22E-08 | POLE4; RFC1; POLD3; POLE; RPA2; RPA1; PCNA                                                                                                                                                                                                                                                       |
| 1269859__REACTOME__R-HSA-174417              | Telomere C-strand (Lagging Strand) Synthesis          | 7  | 34.53 | 3.03E-10 | 1.22E-08 | POLE4; RFC1; POLD3; POLE; RPA2; RPA1; PCNA                                                                                                                                                                                                                                                       |
| 1339110__REACTOME__R-HSA-3232118             | SUMOylation of transcription factors                  | 7  | 34.53 | 3.03E-10 | 1.22E-08 | SUMO3; UBE2I; TP53BP1; CDKN2A; SUMO2; SUMO1; PIAS3                                                                                                                                                                                                                                               |
| 1269817__REACTOME__R-HSA-3301854             | Nuclear Pore Complex (NPC) Disassembly                | 8  | 25.65 | 3.04E-10 | 1.22E-08 | POM121C; TPR; RANBP2; NUP153; NUP85; NDC1; NUP88; NUP62                                                                                                                                                                                                                                          |
| 1269773__REACTOME__R-HSA-68962               | Activation of the pre-replicative complex             | 8  | 25.65 | 3.04E-10 | 1.22E-08 | POLE4; MCM7; MCM5; POLE; CDC45; MCM3; RPA2; RPA1                                                                                                                                                                                                                                                 |

|                                                                    |                                                                                                                                     |    |       |          |          |                                                                                                  |
|--------------------------------------------------------------------|-------------------------------------------------------------------------------------------------------------------------------------|----|-------|----------|----------|--------------------------------------------------------------------------------------------------|
| 1269073__REACTOME__R-HSA-167160;<br>1269681__REACTOME__R-HSA-77075 | RNA Pol II CTD phosphorylation and interaction with CE during HIV infection; RNA Pol II CTD phosphorylation and interaction with CE | 8  | 25.65 | 3.04E-10 | 1.22E-08 | POLR2A; POLR2H; POLR2J; ERCC2; POLR2K; POLR2F; ERCC3; CCNH                                       |
| 1269094__REACTOME__R-HSA-180910                                    | Vpr-mediated nuclear import of PICs                                                                                                 | 8  | 25.65 | 3.04E-10 | 1.22E-08 | POM121C; TPR; RANBP2; NUP153; NUP85; NDC1; NUP88; NUP62                                          |
| 1269096__REACTOME__R-HSA-180746                                    | Nuclear import of Rev protein                                                                                                       | 8  | 25.65 | 3.04E-10 | 1.22E-08 | POM121C; TPR; RANBP2; NUP153; NUP85; NDC1; NUP88; NUP62                                          |
| 1269697__REACTOME__R-HSA-159227                                    | Transport of the SLBP independent Mature mRNA                                                                                       | 8  | 25.65 | 3.04E-10 | 1.22E-08 | POM121C; TPR; RANBP2; NUP153; NUP85; NDC1; NUP88; NUP62                                          |
| 175229__KEGG__ko03013;<br>177876__KEGG__hsa03013                   | RNA transport                                                                                                                       | 14 | 8.98  | 3.54E-10 | 1.40E-08 | SUMO3; UBE2I; UPF1; POM121C; TPR; RANBP2; NUP153; SUMO2; NUP85; NDC1; SUMO1; NUP88; TACC3; NUP62 |
| 1269676__REACTOME__R-HSA-674695                                    | RNA Polymerase II Pre-transcription Events                                                                                          | 11 | 13.06 | 4.71E-10 | 1.82E-08 | POLR2A; POLR2H; POLR2J; ERCC2; POLR2K; TCEA1; POLR2F; ERCC3; SSRP1; SUPT16H; CCNH                |
| 1269085__REACTOME__R-HSA-165054                                    | Rev-mediated nuclear export of HIV RNA                                                                                              | 8  | 24.43 | 4.85E-10 | 1.82E-08 | POM121C; TPR; RANBP2; NUP153; NUP85; NDC1; NUP88; NUP62                                          |
| 1269687__REACTOME__R-HSA-72086                                     | mRNA Capping                                                                                                                        | 8  | 24.43 | 4.85E-10 | 1.82E-08 | POLR2A; POLR2H; POLR2J; ERCC2; POLR2K; POLR2F; ERCC3; CCNH                                       |
| 1269696__REACTOME__R-HSA-159230                                    | Transport of the SLBP Dependant Mature mRNA                                                                                         | 8  | 24.43 | 4.85E-10 | 1.82E-08 | POM121C; TPR; RANBP2; NUP153; NUP85; NDC1; NUP88; NUP62                                          |
| 198805__WikiPathways__WP45                                         | G1 to S cell cycle control                                                                                                          | 10 | 14.57 | 9.53E-10 | 3.54E-08 | MCM7; MCM5; POLE; CDKN2A; CDC45; MCM3; RPA2; RPA1; PCNA; CCNH                                    |
| 1269092__REACTOME__R-HSA-176033                                    | Interactions of Vpr with host cellular proteins                                                                                     | 8  | 22.30 | 1.14E-09 | 4.03E-08 | POM121C; TPR; RANBP2; NUP153; NUP85; NDC1; NUP88; NUP62                                          |
| 1270368__REACTOME__R-HSA-110314                                    | Recognition of DNA damage by PCNA-containing replication complex                                                                    | 8  | 22.30 | 1.14E-09 | 4.03E-08 | POLE4; RFC1; POLD3; POLE; DTL; RPA2; RPA1; PCNA                                                  |
| 1269131__REACTOME__R-HSA-168276                                    | NS1 Mediated Effects on Host Pathways                                                                                               | 8  | 22.30 | 1.14E-09 | 4.03E-08 | POM121C; TPR; RANBP2; NUP153; NUP85; NDC1; NUP88; NUP62                                          |
| 1269095__REACTOME__R-HSA-177243                                    | Interactions of Rev with host cellular proteins                                                                                     | 8  | 22.30 | 1.14E-09 | 4.03E-08 | POM121C; TPR; RANBP2; NUP153; NUP85; NDC1; NUP88; NUP62                                          |

|                                                                       |                                                                                                      |    |       |          |          |                                                                                                                                                                                                                                                                                                            |
|-----------------------------------------------------------------------|------------------------------------------------------------------------------------------------------|----|-------|----------|----------|------------------------------------------------------------------------------------------------------------------------------------------------------------------------------------------------------------------------------------------------------------------------------------------------------------|
| 1269649__REACTOME__R-HSA-74160                                        | Gene Expression                                                                                      | 43 | 2.60  | 1.15E-09 | 4.03E-08 | PARP1; POLR2A; PML; POLR2H; POLR2J; ERCC2; UBE2I; UPF1; POM121C; CDC25C; POLR2K; TPR; TDG; PRPF38A; RANBP2; NUP153; CDKN2A; UHRF1; RMI2; FANCI; NUP85; RPA2; NDC1; YY1; TCEA1; SUMO1; MEN1; NUP88; TOPBP1; POLR2F; ERCC3; RHNO1; TTC5; POLR3K; SSRP1; NUP62; RBBP8; INTS3; SUPT16H; KAT5; RPA1; PCNA; CCNH |
| 1269853__REACTOME__R-HSA-73886                                        | Chromosome Maintenance                                                                               | 9  | 17.49 | 1.16E-09 | 4.03E-08 | RUVBL2; POLE4; RFC1; POLD3; POLE; RPA2; RUVBL1; RPA1; PCNA                                                                                                                                                                                                                                                 |
| 920977__WikiPathways__WP2446                                          | Retinoblastoma (RB) in Cancer                                                                        | 11 | 11.95 | 1.29E-09 | 4.42E-08 | MCM7; POLD3; POLE; CDC45; MCM3; RPA2; HMGB2; SMC1A; SMC3; RPA1; PCNA                                                                                                                                                                                                                                       |
| 1269698__REACTOME__R-HSA-159231                                       | Transport of Mature mRNA Derived from an Intronless Transcript                                       | 8  | 21.37 | 1.68E-09 | 5.71E-08 | POM121C; TPR; RANBP2; NUP153; NUP85; NDC1; NUP88; NUP62                                                                                                                                                                                                                                                    |
| 1270425__REACTOME__R-HSA-3371453                                      | Regulation of HSF1-mediated heat shock response                                                      | 10 | 13.64 | 1.91E-09 | 6.41E-08 | POM121C; TPR; RANBP2; NUP153; NUP85; RPA2; NDC1; NUP88; NUP62; RPA1                                                                                                                                                                                                                                        |
| 1269316__REACTOME__R-HSA-1169410;<br>1269317__REACTOME__R-HSA-1169408 | Antiviral mechanism by IFN-stimulated genes; ISG15 antiviral mechanism                               | 10 | 13.36 | 2.38E-09 | 7.77E-08 | UBE2L6; TRIM25; POM121C; TPR; RANBP2; NUP153; NUP85; NDC1; NUP88; NUP62                                                                                                                                                                                                                                    |
| 1269082__REACTOME__R-HSA-167243;<br>1269083__REACTOME__R-HSA-167238   | Tat-mediated HIV elongation arrest and recovery; Pausing and recovery of Tat-mediated HIV elongation | 8  | 20.52 | 2.44E-09 | 7.77E-08 | POLR2A; POLR2H; POLR2J; POLR2K; TCEA1; POLR2F; SSRP1; SUPT16H                                                                                                                                                                                                                                              |
| 1269130__REACTOME__R-HSA-168253                                       | Host Interactions with Influenza Factors                                                             | 8  | 20.52 | 2.44E-09 | 7.77E-08 | POM121C; TPR; RANBP2; NUP153; NUP85; NDC1; NUP88; NUP62                                                                                                                                                                                                                                                    |
| 1269921__REACTOME__R-HSA-70153                                        | Glucose transport                                                                                    | 8  | 20.52 | 2.44E-09 | 7.77E-08 | POM121C; TPR; RANBP2; NUP153; NUP85; NDC1; NUP88; NUP62                                                                                                                                                                                                                                                    |
| 1269695__REACTOME__R-HSA-159234                                       | Transport of Mature mRNAs Derived from Intronless Transcripts                                        | 8  | 20.52 | 2.44E-09 | 7.77E-08 | POM121C; TPR; RANBP2; NUP153; NUP85; NDC1; NUP88; NUP62                                                                                                                                                                                                                                                    |
| 463__KEGG__ko04110;<br>83054__KEGG__hsa04110                          | Cell cycle                                                                                           | 12 | 9.62  | 3.05E-09 | 9.50E-08 | MCM7; MCM5; CDC25C; CDKN2A; CDC45; MCM3; SMC1A; RAD21; PTTG1; SMC3; PCNA; CCNH                                                                                                                                                                                                                             |

|                                                                                                                                            |                                                                                                                                                                             |    |       |          |          |                                                                                                                                                   |
|--------------------------------------------------------------------------------------------------------------------------------------------|-----------------------------------------------------------------------------------------------------------------------------------------------------------------------------|----|-------|----------|----------|---------------------------------------------------------------------------------------------------------------------------------------------------|
| 1269075__REACTOME__R-HSA-167158;<br>1269683__REACTOME__R-HSA-113418<br>1269079__REACTOME__R-HSA-167287;<br>1269081__REACTOME__R-HSA-167290 | Formation of the HIV-1 Early Elongation Complex;<br>Formation of the Early Elongation Complex<br>HIV elongation arrest and recovery; Pausing and recovery of HIV elongation | 8  | 19.73 | 3.48E-09 | 1.06E-07 | POLR2A; POLR2H; POLR2J; ERCC2; POLR2K; POLR2F; ERCC3; CCNH                                                                                        |
| 198811__WikiPathways__WP179                                                                                                                | Cell Cycle                                                                                                                                                                  | 11 | 10.85 | 3.81E-09 | 1.15E-07 | MCM7; MCM5; CDC25C; CDKN2A; CDC45; MCM3; MEN1; SMC1A; PTTG1; PCNA; CCNH                                                                           |
| 1269920__REACTOME__R-HSA-189200                                                                                                            | Hexose transport                                                                                                                                                            | 8  | 18.32 | 6.75E-09 | 2.00E-07 | POM121C; TPR; RANBP2; NUP153; NUP85; NDC1; NUP88; NUP62                                                                                           |
| 1309110__REACTOME__R-HSA-5693571                                                                                                           | Nonhomologous End-Joining (NHEJ)                                                                                                                                            | 8  | 17.69 | 9.20E-09 | 2.70E-07 | POLL; UBE2V2; TP53BP1; XRCC4; TDP1; SUMO1; UIMC1; KAT5                                                                                            |
| 1269779__REACTOME__R-HSA-69239                                                                                                             | Synthesis of DNA                                                                                                                                                            | 11 | 9.66  | 1.36E-08 | 3.96E-07 | POLE4; RFC1; MCM7; MCM5; POLD3; POLE; CDC45; MCM3; RPA2; RPA1; PCNA                                                                               |
| 1269056__REACTOME__R-HSA-5663205                                                                                                           | Infectious disease                                                                                                                                                          | 20 | 4.48  | 1.48E-08 | 4.26E-07 | POLR2A; POLR2H; POLR2J; ERCC2; POM121C; POLR2K; TPR; XRCC4; RANBP2; NUP153; NUP85; NDC1; TCEA1; NUP88; POLR2F; ERCC3; SSRP1; NUP62; SUPT16H; CCNH |
| 1269731__REACTOME__R-HSA-194441;<br>1269732__REACTOME__R-HSA-191859                                                                        | Metabolism of non-coding RNA; snRNP Assembly                                                                                                                                | 8  | 16.55 | 1.65E-08 | 4.71E-07 | POM121C; TPR; RANBP2; NUP153; NUP85; NDC1; NUP88; NUP62                                                                                           |
| 1270372__REACTOME__R-HSA-5655862                                                                                                           | Translesion synthesis by POLK                                                                                                                                               | 6  | 29.59 | 2.01E-08 | 5.70E-07 | RFC1; REV1; RPA2; RPA1; PCNA; POLK                                                                                                                |
| 1309089__REACTOME__R-HSA-6784531                                                                                                           | tRNA processing in the nucleus                                                                                                                                              | 8  | 16.03 | 2.17E-08 | 6.03E-07 | POM121C; TPR; RANBP2; NUP153; NUP85; NDC1; NUP88; NUP62                                                                                           |



|                                                                                                                                                                                                                 |                                                                                                                                                                                                                                                                                            |    |       |          |          |                                                                                                 |
|-----------------------------------------------------------------------------------------------------------------------------------------------------------------------------------------------------------------|--------------------------------------------------------------------------------------------------------------------------------------------------------------------------------------------------------------------------------------------------------------------------------------------|----|-------|----------|----------|-------------------------------------------------------------------------------------------------|
| 1269071__REACTOME__R-HSA-167161;<br>1269072__REACTOME__R-HSA-167162;<br>1269677__REACTOME__R-HSA-73779;<br>1269678__REACTOME__R-HSA-76042;<br>1269679__REACTOME__R-HSA-75953;<br>1269680__REACTOME__R-HSA-73776 | HIV Transcription Initiation; RNA Polymerase II HIV Promoter Escape; RNA Polymerase II Transcription Pre-Initiation And Promoter Opening; RNA Polymerase II Transcription Initiation And Promoter Clearance; RNA Polymerase II Transcription Initiation; RNA Polymerase II Promoter Escape | 8  | 16.03 | 2.17E-08 | 6.03E-07 | POLR2A; POLR2H; POLR2J; ERCC2; POLR2K; POLR2F; ERCC3; CCNH                                      |
| 1269115__REACTOME__R-HSA-168273                                                                                                                                                                                 | Influenza Viral RNA Transcription and Replication                                                                                                                                                                                                                                          | 13 | 7.25  | 2.24E-08 | 6.18E-07 | POLR2A; POLR2H; POLR2J; POM121C; POLR2K; TPR; RANBP2; NUP153; NUP85; NDC1; NUP88; POLR2F; NUP62 |
| 1269875__REACTOME__R-HSA-69306                                                                                                                                                                                  | DNA Replication                                                                                                                                                                                                                                                                            | 11 | 9.16  | 2.43E-08 | 6.62E-07 | POLE4; RFC1; MCM7; MCM5; POLD3; POLE; CDC45; MCM3; RPA2; RPA1; PCNA                             |
| 1270421__REACTOME__R-HSA-3371556                                                                                                                                                                                | Cellular response to heat stress                                                                                                                                                                                                                                                           | 10 | 10.51 | 2.77E-08 | 7.49E-07 | POM121C; TPR; RANBP2; NUP153; NUP85; RPA2; NDC1; NUP88; NUP62; RPA1                             |
| 1269815__REACTOME__R-HSA-2980766                                                                                                                                                                                | Nuclear Envelope Breakdown                                                                                                                                                                                                                                                                 | 8  | 15.09 | 3.65E-08 | 9.78E-07 | POM121C; TPR; RANBP2; NUP153; NUP85; NDC1; NUP88; NUP62                                         |
| 1309108__REACTOME__R-HSA-5685938                                                                                                                                                                                | HDR through Single Strand Annealing (SSA)                                                                                                                                                                                                                                                  | 7  | 19.52 | 3.81E-08 | 1.01E-06 | RMI2; RPA2; TOPBP1; RHNO1; RBBP8; KAT5; RPA1                                                    |
| 309__KEGG__ko00240;<br>82946__KEGG__hsa00240                                                                                                                                                                    | Pyrimidine metabolism                                                                                                                                                                                                                                                                      | 10 | 10.18 | 3.82E-08 | 1.01E-06 | POLR2A; POLE4; POLR2H; POLR2J; POLD3; POLE; POLR2K; POLR2F; DUT; POLR3K                         |
| 1269109__REACTOME__R-HSA-168255                                                                                                                                                                                 | Influenza Life Cycle                                                                                                                                                                                                                                                                       | 13 | 6.78  | 5.07E-08 | 1.32E-06 | POLR2A; POLR2H; POLR2J; POM121C; POLR2K; TPR; RANBP2; NUP153; NUP85; NDC1; NUP88; POLR2F; NUP62 |
| 1269311__REACTOME__R-HSA-913531                                                                                                                                                                                 | Interferon Signaling                                                                                                                                                                                                                                                                       | 12 | 7.54  | 5.11E-08 | 1.32E-06 | UBE2L6; PML; TRIM25; POM121C; TPR; RANBP2; NUP153; NUP85; NDC1; SUMO1; NUP88; NUP62             |
| 1269757__REACTOME__R-HSA-176187                                                                                                                                                                                 | Activation of ATR in response to replication stress                                                                                                                                                                                                                                        | 7  | 18.70 | 5.30E-08 | 1.35E-06 | MCM7; MCM5; CDC25C; CDC45; MCM3; RPA2; RPA1                                                     |
| 1309104__REACTOME__R-HSA-5693616                                                                                                                                                                                | Presynaptic phase of homologous DNA pairing and strand exchange                                                                                                                                                                                                                            | 7  | 17.95 | 7.27E-08 | 1.84E-06 | RMI2; RPA2; TOPBP1; RHNO1; RBBP8; KAT5; RPA1                                                    |

|                                                                    |                                                                                                                                      |    |       |          |          |                                                                                                          |
|--------------------------------------------------------------------|--------------------------------------------------------------------------------------------------------------------------------------|----|-------|----------|----------|----------------------------------------------------------------------------------------------------------|
| 1383076__REACTOME__R-HSA-5633007                                   | Regulation of TP53 Activity                                                                                                          | 12 | 7.26  | 7.90E-08 | 1.98E-06 | PML; CDKN2A; RMI2; RPA2; TOPBP1; RHNO1; TTC5; SSRP1; RBBP8; SUPT16H; KAT5; RPA1                          |
| 1309103__REACTOME__R-HSA-5693579                                   | Homologous DNA Pairing and Strand Exchange                                                                                           | 7  | 17.26 | 9.82E-08 | 2.43E-06 | RMI2; RPA2; TOPBP1; RHNO1; RBBP8; KAT5; RPA1                                                             |
| 1269108__REACTOME__R-HSA-168254                                    | Influenza Infection                                                                                                                  | 13 | 6.41  | 9.85E-08 | 2.43E-06 | POLR2A; POLR2H; POLR2J; POM121C; POLR2K; TPR; RANBP2; NUP153; NUP85; NDC1; NUP88; POLR2F; NUP62          |
| 377128__KEGG__ko03460; 377262__KEGG__hsa03460                      | Fanconi anemia pathway                                                                                                               | 7  | 16.62 | 1.31E-07 | 3.18E-06 | REV1; RMI2; FANCI; RPA2; FAAP100; RPA1; POLK                                                             |
| 1269788__REACTOME__R-HSA-69186                                     | Lagging Strand Synthesis                                                                                                             | 5  | 32.06 | 2.02E-07 | 4.88E-06 | RFC1; POLD3; RPA2; RPA1; PCNA                                                                            |
| 1269688__REACTOME__R-HSA-72203                                     | Processing of Capped Intron-Containing Pre-mRNA                                                                                      | 14 | 5.51  | 2.11E-07 | 5.04E-06 | POLR2A; POLR2H; POLR2J; POM121C; POLR2K; TPR; PRPF38A; RANBP2; NUP153; NUP85; NDC1; NUP88; POLR2F; NUP62 |
| 1339139__REACTOME__R-HSA-5619507; 1339140__REACTOME__R-HSA-5617472 | Activation of HOX genes during differentiation; Activation of anterior HOX genes in hindbrain development during early embryogenesis | 8  | 12.21 | 2.13E-07 | 5.07E-06 | POLR2A; POLR2H; POLR2J; POLR2K; PAGR1; YY1; POLR2F; PIAS2                                                |
| 1269793__REACTOME__R-HSA-2468052                                   | Establishment of Sister Chromatid Cohesion                                                                                           | 4  | 51.30 | 2.79E-07 | 6.58E-06 | SMC1A; RAD21; SMC3; CDCA5                                                                                |
| 442__KEGG__ko03020; 83037__KEGG__hsa03020                          | RNA polymerase                                                                                                                       | 6  | 20.25 | 2.95E-07 | 6.89E-06 | POLR2A; POLR2H; POLR2J; POLR2K; POLR2F; POLR3K                                                           |
| 1383080__REACTOME__R-HSA-6804756                                   | Regulation of TP53 Activity through Phosphorylation                                                                                  | 9  | 9.62  | 3.13E-07 | 7.25E-06 | RMI2; RPA2; TOPBP1; RHNO1; SSRP1; RBBP8; SUPT16H; KAT5; RPA1                                             |
| 1269675__REACTOME__R-HSA-73857                                     | RNA Polymerase II Transcription                                                                                                      | 11 | 7.12  | 3.42E-07 | 7.88E-06 | POLR2A; POLR2H; POLR2J; ERCC2; POLR2K; TCEA1; POLR2F; ERCC3; SSRP1; SUPT16H; CCNH                        |
| 453__KEGG__ko03430; 83045__KEGG__hsa03430                          | Mismatch repair                                                                                                                      | 5  | 29.15 | 3.66E-07 | 8.31E-06 | RFC1; POLD3; RPA2; RPA1; PCNA                                                                            |
| 413415__KEGG__hsa_M00180; 890456__KEGG__M00180                     | RNA polymerase II, eukaryotes                                                                                                        | 5  | 29.15 | 3.66E-07 | 8.31E-06 | POLR2A; POLR2H; POLR2J; POLR2K; POLR2F                                                                   |
| 1269694__REACTOME__R-HSA-159236                                    | Transport of Mature mRNA derived from an Intron-Containing Transcript                                                                | 8  | 11.40 | 3.75E-07 | 8.44E-06 | POM121C; TPR; RANBP2; NUP153; NUP85; NDC1; NUP88; NUP62                                                  |

|                                  |                                                         |    |       |          |          |                                                                      |
|----------------------------------|---------------------------------------------------------|----|-------|----------|----------|----------------------------------------------------------------------|
| 1269764__REACTOME__R-HSA-453279  | Mitotic G1-G1/S phases                                  | 11 | 7.05  | 3.79E-07 | 8.48E-06 | POLE4; MCM7; MCM5; POLE; CDKN2A; CDC45; MCM3; RPA2; RPA1; PCNA; CCNH |
| 1270373__REACTOME__R-HSA-5656121 | Translesion synthesis by POLI                           | 5  | 26.72 | 6.20E-07 | 1.37E-05 | RFC1; REV1; RPA2; RPA1; PCNA                                         |
| 1270370__REACTOME__R-HSA-110312  | Translesion synthesis by REV1                           | 5  | 26.72 | 6.20E-07 | 1.37E-05 | RFC1; REV1; RPA2; RPA1; PCNA                                         |
| 1269768__REACTOME__R-HSA-69206   | G1/S Transition                                         | 10 | 7.54  | 7.00E-07 | 1.53E-05 | POLE4; MCM7; MCM5; POLE; CDC45; MCM3; RPA2; RPA1; PCNA; CCNH         |
| 1269865__REACTOME__R-HSA-1500620 | Meiosis                                                 | 7  | 13.20 | 7.24E-07 | 1.57E-05 | UBE2I; RPA2; SMC1A; RAD21; SMC3; RBBP8; RPA1                         |
| 1269661__REACTOME__R-HSA-73772   | RNA Polymerase I Promoter Escape                        | 6  | 17.49 | 7.80E-07 | 1.67E-05 | POLR2H; ERCC2; POLR2K; POLR2F; ERCC3; CCNH                           |
| 1269663__REACTOME__R-HSA-73863   | RNA Polymerase I Transcription Termination              | 6  | 17.49 | 7.80E-07 | 1.67E-05 | POLR2H; ERCC2; POLR2K; POLR2F; ERCC3; CCNH                           |
| 1270412__REACTOME__R-HSA-5358565 | Mismatch repair (MMR) directed by MSH2:MSH6 (MutSalpha) | 4  | 42.75 | 8.27E-07 | 1.75E-05 | POLD3; RPA2; RPA1; PCNA                                              |
| 1268742__REACTOME__R-HSA-3065678 | SUMO is transferred from E1 to E2 (UBE2I, UBC9)         | 4  | 42.75 | 8.27E-07 | 1.75E-05 | SUMO3; UBE2I; SUMO2; SUMO1                                           |
| 1269693__REACTOME__R-HSA-72202   | Transport of Mature Transcript to Cytoplasm             | 8  | 10.06 | 1.02E-06 | 2.15E-05 | POM121C; TPR; RANBP2; NUP153; NUP85; NDC1; NUP88; NUP62              |
| 1383045__REACTOME__R-HSA-8851708 | Signaling by FGFR2 IIIa TM                              | 5  | 22.90 | 1.53E-06 | 3.15E-05 | POLR2A; POLR2H; POLR2J; POLR2K; POLR2F                               |
| 1269724__REACTOME__R-HSA-5601884 | PIWI-interacting RNA (piRNA) biogenesis                 | 5  | 22.90 | 1.53E-06 | 3.15E-05 | POLR2A; POLR2H; POLR2J; POLR2K; POLR2F                               |
| 1270413__REACTOME__R-HSA-5358606 | Mismatch repair (MMR) directed by MSH2:MSH3 (MutSbeta)  | 4  | 36.64 | 1.91E-06 | 3.82E-05 | POLD3; RPA2; RPA1; PCNA                                              |
| 1269863__REACTOME__R-HSA-174437  | Removal of the Flap Intermediate from the C-strand      | 4  | 36.64 | 1.91E-06 | 3.82E-05 | POLD3; RPA2; RPA1; PCNA                                              |
| 1270411__REACTOME__R-HSA-5358508 | Mismatch Repair                                         | 4  | 36.64 | 1.91E-06 | 3.82E-05 | POLD3; RPA2; RPA1; PCNA                                              |
| 1269862__REACTOME__R-HSA-174414  | Processive synthesis on the C-strand of the telomere    | 4  | 36.64 | 1.91E-06 | 3.82E-05 | POLD3; RPA2; RPA1; PCNA                                              |

|                                                                         |                                                                  |    |       |          |          |                                                                                                             |
|-------------------------------------------------------------------------|------------------------------------------------------------------|----|-------|----------|----------|-------------------------------------------------------------------------------------------------------------|
| 454__KEGG_ko03440;<br>83046__KEGG_hsa03440                              | Homologous recombination                                         | 6  | 14.80 | 2.29E-06 | 4.55E-05 | POLD3; RPA2; TOPBP1; RBBP8; UIMC1; RPA1                                                                     |
| 1269810__REACTOME_R-<br>HSA-68886                                       | M Phase                                                          | 13 | 4.85  | 2.52E-06 | 4.98E-05 | POM121C; TPR; RANBP2; NUP153; NUP85; NDC1; NUP88; SMC1A; RAD21; PTTG1; SMC3; NUP62; CDCA5                   |
| 1270414__REACTOME_R-<br>HSA-2262752                                     | Cellular responses to stress                                     | 16 | 3.92  | 2.82E-06 | 5.54E-05 | RING1; PHC1; POM121C; TPR; RANBP2; NUP153; CDKN2A; SCMH1; NUP85; PHC2; RPA2; NDC1; NUP88; NUP62; KAT5; RPA1 |
| 1269662__REACTOME_R-<br>HSA-73777                                       | RNA Polymerase I Chain<br>Elongation                             | 6  | 14.25 | 2.90E-06 | 5.67E-05 | POLR2H; ERCC2; POLR2K; POLR2F; ERCC3; CCNH                                                                  |
| 1309088__REACTOME_R-<br>HSA-72306                                       | tRNA processing                                                  | 8  | 8.69  | 3.21E-06 | 6.23E-05 | POM121C; TPR; RANBP2; NUP153; NUP85; NDC1; NUP88; NUP62                                                     |
| 1269734__REACTOME_R-<br>HSA-212165                                      | Epigenetic regulation of gene<br>expression                      | 8  | 8.55  | 3.66E-06 | 7.05E-05 | POLR2H; ERCC2; POLR2K; TDG; UHRF1; POLR2F; ERCC3; CCNH                                                      |
| 198875__WikiPathways_WP<br>531                                          | Mismatch repair                                                  | 3  | 64.12 | 3.71E-06 | 7.09E-05 | RFC1; RPA1; PCNA                                                                                            |
| 1269790__REACTOME_R-<br>HSA-69166                                       | Removal of the Flap<br>Intermediate                              | 4  | 32.06 | 3.77E-06 | 7.09E-05 | POLD3; RPA2; RPA1; PCNA                                                                                     |
| 1268739__REACTOME_R-<br>HSA-3215018                                     | Processing and activation of<br>SUMO                             | 4  | 32.06 | 3.77E-06 | 7.09E-05 | SUMO3; UBE2I; SUMO2; SUMO1                                                                                  |
| 1269789__REACTOME_R-<br>HSA-69183                                       | Processive synthesis on the<br>lagging strand                    | 4  | 32.06 | 3.77E-06 | 7.09E-05 | POLD3; RPA2; RPA1; PCNA                                                                                     |
| 1269720__REACTOME_R-<br>HSA-203927                                      | MicroRNA (miRNA)<br>biogenesis                                   | 5  | 18.86 | 4.55E-06 | 8.51E-05 | POLR2A; POLR2H; POLR2J; POLR2K; POLR2F                                                                      |
| 1269831__REACTOME_R-<br>HSA-68874;<br>1269832__REACTOME_R-<br>HSA-69002 | M/G1 Transition; DNA<br>Replication Pre-Initiation               | 8  | 8.02  | 6.00E-06 | 1.12E-04 | POLE4; MCM7; MCM5; POLE; CDC45; MCM3; RPA2; RPA1                                                            |
| 138029__Pathway<br>Interaction<br>Database__ranbp2pathway               | Sumoylation by RanBP2<br>regulates transcriptional<br>repression | 4  | 28.50 | 6.70E-06 | 1.23E-04 | UBE2I; RANBP2; SUMO1; PIAS2                                                                                 |
| 1269785__REACTOME_R-<br>HSA-176974                                      | Unwinding of DNA                                                 | 4  | 28.50 | 6.70E-06 | 1.23E-04 | MCM7; MCM5; CDC45; MCM3                                                                                     |
| 1269811__REACTOME_R-<br>HSA-68875                                       | Mitotic Prophase                                                 | 8  | 7.89  | 6.76E-06 | 1.23E-04 | POM121C; TPR; RANBP2; NUP153; NUP85; NDC1; NUP88; NUP62                                                     |
| 1268870__REACTOME_R-<br>HSA-1839126                                     | FGFR2 mutant receptor<br>activation                              | 5  | 16.87 | 8.34E-06 | 1.51E-04 | POLR2A; POLR2H; POLR2J; POLR2K; POLR2F                                                                      |

|                                              |                                                               |   |       |          |          |                                                                    |
|----------------------------------------------|---------------------------------------------------------------|---|-------|----------|----------|--------------------------------------------------------------------|
| 1269078__REACTOME__R-HSA-167242              | Abortive elongation of HIV-1 transcript in the absence of Tat | 5 | 16.87 | 8.34E-06 | 1.51E-04 | POLR2A; POLR2H; POLR2J; POLR2K; POLR2F                             |
| 1309121__REACTOME__R-HSA-6783310             | Fanconi Anemia Pathway                                        | 5 | 16.03 | 1.10E-05 | 1.94E-04 | FANCI; RPA2; FAAP20; FAAP100; RPA1                                 |
| 1383022__REACTOME__R-HSA-6803529             | FGFR2 alternative splicing                                    | 5 | 16.03 | 1.10E-05 | 1.94E-04 | POLR2A; POLR2H; POLR2J; POLR2K; POLR2F                             |
| 413416__KEGG_hsa_M00181; 890457__KEGG_M00181 | RNA polymerase III, eukaryotes                                | 4 | 25.65 | 1.10E-05 | 1.94E-04 | POLR2H; POLR2K; POLR2F; POLR3K                                     |
| 1269660__REACTOME__R-HSA-73762               | RNA Polymerase I Transcription Initiation                     | 6 | 11.32 | 1.21E-05 | 2.10E-04 | POLR2H; ERCC2; POLR2K; POLR2F; ERCC3; CCNH                         |
| 1458202__WikiPathways__W P3878               | ATM Signaling Network in Development and Disease              | 6 | 10.99 | 1.44E-05 | 2.49E-04 | PPP5C; TP53BP1; HMG1; SMC1A; RBBP8; KAT5                           |
| 1269739__REACTOME__R-HSA-427413              | NoRC negatively regulates rRNA expression                     | 6 | 10.69 | 1.70E-05 | 2.93E-04 | POLR2H; ERCC2; POLR2K; POLR2F; ERCC3; CCNH                         |
| 1269670__REACTOME__R-HSA-73780               | RNA Polymerase III Chain Elongation                           | 4 | 23.32 | 1.71E-05 | 2.94E-04 | POLR2H; POLR2K; POLR2F; POLR3K                                     |
| 1269737__REACTOME__R-HSA-5250941             | Negative epigenetic regulation of rRNA expression             | 6 | 10.12 | 2.35E-05 | 4.01E-04 | POLR2H; ERCC2; POLR2K; POLR2F; ERCC3; CCNH                         |
| 307__KEGG_ko00230; 82944__KEGG_hsa00230      | Purine metabolism                                             | 9 | 5.77  | 2.38E-05 | 4.03E-04 | POLR2A; POLE4; POLR2H; POLR2J; POLD3; POLE; POLR2K; POLR2F; POLR3K |
| 1268869__REACTOME__R-HSA-5655253             | Signaling by FGFR2 in disease                                 | 5 | 12.82 | 3.53E-05 | 5.93E-04 | POLR2A; POLR2H; POLR2J; POLR2K; POLR2F                             |
| 1270371__REACTOME__R-HSA-110320              | Translesion Synthesis by POLH                                 | 4 | 19.73 | 3.62E-05 | 5.95E-04 | RFC1; RPA2; RPA1; PCNA                                             |
| 1269671__REACTOME__R-HSA-73980               | RNA Polymerase III Transcription Termination                  | 4 | 19.73 | 3.62E-05 | 5.95E-04 | POLR2H; POLR2K; POLR2F; POLR3K                                     |
| 1268741__REACTOME__R-HSA-3065676             | SUMO is conjugated to E1 (UBA2:SAE1)                          | 3 | 38.47 | 3.62E-05 | 5.95E-04 | SUMO3; SUMO2; SUMO1                                                |
| 1268740__REACTOME__R-HSA-3065679             | SUMO is proteolytically processed                             | 3 | 38.47 | 3.62E-05 | 5.95E-04 | SUMO3; SUMO2; SUMO1                                                |
| 1269658__REACTOME__R-HSA-73854               | RNA Polymerase I Promoter Clearance                           | 6 | 9.38  | 3.69E-05 | 6.02E-04 | POLR2H; ERCC2; POLR2K; POLR2F; ERCC3; CCNH                         |

|                                                |                                                                       |    |       |          |          |                                                                                                                                                           |
|------------------------------------------------|-----------------------------------------------------------------------|----|-------|----------|----------|-----------------------------------------------------------------------------------------------------------------------------------------------------------|
| 1269656__REACTOME__R-HSA-504046                | RNA Polymerase I, RNA Polymerase III, and Mitochondrial Transcription | 7  | 7.48  | 3.71E-05 | 6.03E-04 | POLR2H; ERCC2; POLR2K; POLR2F; ERCC3; POLR3K; CCNH                                                                                                        |
| 1383088__REACTOME__R-HSA-6807505               | RNA polymerase II transcribes snRNA genes                             | 6  | 9.16  | 4.25E-05 | 6.86E-04 | POLR2A; POLR2H; POLR2J; POLR2K; POLR2F; INTS3                                                                                                             |
| 1270346__REACTOME__R-HSA-452723                | Transcriptional regulation of pluripotent stem cells                  | 5  | 12.33 | 4.32E-05 | 6.95E-04 | POLR2A; POLR2H; POLR2J; POLR2K; POLR2F                                                                                                                    |
| 1269657__REACTOME__R-HSA-73864                 | RNA Polymerase I Transcription                                        | 6  | 8.95  | 4.87E-05 | 7.79E-04 | POLR2H; ERCC2; POLR2K; POLR2F; ERCC3; CCNH                                                                                                                |
| 466__KEGG__ko04120; 83056__KEGG__hsa04120      | Ubiquitin mediated proteolysis                                        | 8  | 5.90  | 5.87E-05 | 9.34E-04 | UBE2L6; PML; TRIP12; UBE2A; UBE2I; UBR5; PIAS3; PIAS2                                                                                                     |
| 1268854__REACTOME__R-HSA-1643685               | Disease                                                               | 21 | 2.54  | 6.61E-05 | 1.04E-03 | POLR2A; POLR2H; POLR2J; ERCC2; POM121C; CDC25C; POLR2K; TPR; XRCC4; RANBP2; NUP153; NUP85; NDC1; TCEA1; NUP88; POLR2F; ERCC3; SSRP1; NUP62; SUPT16H; CCNH |
| 1269907__REACTOME__R-HSA-425407                | SLC-mediated transmembrane transport                                  | 9  | 5.06  | 6.75E-05 | 1.06E-03 | POM121C; TPR; RANBP2; NUP153; SLC25A10; NUP85; NDC1; NUP88; NUP62                                                                                         |
| 413421__KEGG__hsa_M00285; 890547__KEGG__M00285 | MCM complex                                                           | 3  | 32.06 | 7.16E-05 | 1.11E-03 | MCM7; MCM5; MCM3                                                                                                                                          |
| 1269830__REACTOME__R-HSA-2470946               | Cohesin Loading onto Chromatin                                        | 3  | 32.06 | 7.16E-05 | 1.11E-03 | SMC1A; RAD21; SMC3                                                                                                                                        |
| 1269667__REACTOME__R-HSA-76061                 | RNA Polymerase III Transcription Initiation From Type 1 Promoter      | 4  | 16.03 | 8.89E-05 | 1.36E-03 | POLR2H; POLR2K; POLR2F; POLR3K                                                                                                                            |
| 1269669__REACTOME__R-HSA-76071                 | RNA Polymerase III Transcription Initiation From Type 3 Promoter      | 4  | 16.03 | 8.89E-05 | 1.36E-03 | POLR2H; POLR2K; POLR2F; POLR3K                                                                                                                            |
| 1269668__REACTOME__R-HSA-76066                 | RNA Polymerase III Transcription Initiation From Type 2 Promoter      | 4  | 16.03 | 8.89E-05 | 1.36E-03 | POLR2H; POLR2K; POLR2F; POLR3K                                                                                                                            |
| 920989__WikiPathways__WP1530                   | miRNA Regulation of DNA Damage Response                               | 6  | 8.02  | 9.20E-05 | 1.40E-03 | RFC1; PML; MCM7; CDC25C; RPA2; SMC1A                                                                                                                      |
| 1269091__REACTOME__R-HSA-162909                | Host Interactions of HIV factors                                      | 8  | 5.52  | 9.46E-05 | 1.43E-03 | POM121C; TPR; RANBP2; NUP153; NUP85; NDC1; NUP88; NUP62                                                                                                   |

|                                                                                                       |                                                                                                      |   |       |          |          |                                          |
|-------------------------------------------------------------------------------------------------------|------------------------------------------------------------------------------------------------------|---|-------|----------|----------|------------------------------------------|
| 1269786__REACTOME__R-HSA-69109;<br>1269787__REACTOME__R-HSA-69091;<br>1269861__REACTOME__R-HSA-174411 | Leading Strand Synthesis; Polymerase switching; Polymerase switching on the C-strand of the telomere | 3 | 27.48 | 1.24E-04 | 1.86E-03 | RFC1; POLD3; PCNA                        |
| 413425__KEGG__hsa_M00290; 890551__KEGG__M00290                                                        | Holo-TFIIF complex                                                                                   | 3 | 27.48 | 1.24E-04 | 1.86E-03 | ERCC2; ERCC3; CCNH                       |
| 1268863__REACTOME__R-HSA-1226099                                                                      | Signaling by FGFR in disease                                                                         | 5 | 9.16  | 1.91E-04 | 2.84E-03 | POLR2A; POLR2H; POLR2J; POLR2K; POLR2F   |
| 1269821__REACTOME__R-HSA-2500257                                                                      | Resolution of Sister Chromatid Cohesion                                                              | 6 | 6.87  | 2.20E-04 | 3.25E-03 | RANBP2; NUP85; SMC1A; RAD21; SMC3; CDCA5 |
| 1269666__REACTOME__R-HSA-76046                                                                        | RNA Polymerase III Transcription Initiation                                                          | 4 | 12.82 | 2.26E-04 | 3.31E-03 | POLR2H; POLR2K; POLR2F; POLR3K           |
| 413423__KEGG__hsa_M00288; 468376__KEGG__M00288                                                        | RPA complex                                                                                          | 2 | 64.12 | 2.41E-04 | 3.53E-03 | RPA2; RPA1                               |
| 1269867__REACTOME__R-HSA-1221632                                                                      | Meiotic synapsis                                                                                     | 4 | 12.21 | 2.75E-04 | 4.01E-03 | UBE2I; SMC1A; RAD21; SMC3                |
| 413479__KEGG__hsa_M00182; 890458__KEGG__M00182                                                        | RNA polymerase I, eukaryotes                                                                         | 3 | 21.37 | 2.91E-04 | 4.19E-03 | POLR2H; POLR2K; POLR2F                   |
| 1269829__REACTOME__R-HSA-68884                                                                        | Mitotic Telophase/Cytokinesis                                                                        | 3 | 21.37 | 2.91E-04 | 4.19E-03 | SMC1A; RAD21; SMC3                       |
| 1269664__REACTOME__R-HSA-74158;<br>1269665__REACTOME__R-HSA-749476                                    | RNA Polymerase III Transcription; RNA Polymerase III Abortive And Retractive Initiation              | 4 | 11.66 | 3.32E-04 | 4.77E-03 | POLR2H; POLR2K; POLR2F; POLR3K           |
| 1269691__REACTOME__R-HSA-72165                                                                        | mRNA Splicing - Minor Pathway                                                                        | 5 | 7.82  | 4.08E-04 | 5.83E-03 | POLR2A; POLR2H; POLR2J; POLR2K; POLR2F   |
| 1269820__REACTOME__R-HSA-68877                                                                        | Mitotic Prometaphase                                                                                 | 6 | 6.11  | 4.21E-04 | 5.98E-03 | RANBP2; NUP85; SMC1A; RAD21; SMC3; CDCA5 |
| 198806__WikiPathways__WP138                                                                           | Androgen receptor signaling pathway                                                                  | 6 | 5.92  | 4.99E-04 | 7.03E-03 | UBE2I; SUMO1; RNF4; KAT5; PIAS3; PIAS2   |
