# Supplementary material for: Cytogenetic and Transcriptomic Analysis of Human Endometrial MSC Retaining Proliferative Activity after Sublethal Heat Shock
Source: MDPI journal article supplement (doi:10.3390/cells7110184), 2018-10-25
Supplement: s1 [file s1]

[illegible]

**B -Chromosomal changes revealed by the G-banding method in SHS-SP at passage 13 (6 passage after HS) – 80% cells with changes**

[illegible]

|    |          |          |          |        |        |   |   |        |   |        |   |        |  |  |   |   |   |  |   |   |   |   |   |    |
|----|----------|----------|----------|--------|--------|---|---|--------|---|--------|---|--------|--|--|---|---|---|--|---|---|---|---|---|----|
| 21 |          | b(add)   |          | b(del) |        |   |   | b(del) |   |        | m | b(add) |  |  |   |   | m |  |   | t |   | m | a | 42 |
| 22 |          |          |          |        |        |   |   |        |   |        |   |        |  |  |   |   |   |  |   |   |   |   |   | 46 |
| 23 |          |          |          |        |        |   |   |        |   |        |   |        |  |  |   |   |   |  |   |   |   |   |   | 46 |
| 24 |          |          |          |        |        |   |   |        |   |        |   |        |  |  |   |   |   |  |   |   |   |   |   | 46 |
| 25 | t+b(del) |          |          |        |        |   |   |        |   |        |   |        |  |  |   |   |   |  |   |   |   | m |   | 46 |
| 26 | b(del)   | t+b(del) | t+b(del) |        |        |   |   |        | m |        | m | m      |  |  |   |   |   |  |   |   |   |   |   | 45 |
| 27 |          |          |          |        | b(del) |   |   |        |   | b(del) | a |        |  |  |   | m |   |  | m |   | m | m | t | 41 |
| 28 |          |          |          |        | m      |   | t |        |   |        |   |        |  |  | m | m |   |  |   | m |   |   |   | 43 |
| 29 |          | b(del)   | t+b(del) |        |        | m |   |        |   | m      | m |        |  |  |   |   |   |  |   |   |   | m |   | 43 |

m - monosomy;

t - trisomy;

b(del) – break of chromosome with deletion;

b(add) – break of chromosome with preservation of genetic material;

iso – isochromosome;

13:14 - Ectopic conjugation between chromosomes 13 and 14

t+b – trisomy and chromosomal break

m+b - monosomy and chromosomal break
