# Supplementary material for: Cytogenetic and Transcriptomic Analysis of Human Endometrial MSC Retaining Proliferative Activity after Sublethal Heat Shock
Source: MDPI journal article supplement (doi:10.3390/cells7110184), 2018-10-25
Supplement: s1 [file s1]

**Supplementary Table 3. DNA recombination and repair related gene modules enriching for genes significantly deregulated in SHS-SP vs. control MSC.**

\* GO module or BioSystems pathway accession number.

\*\* GO module or BioSystems pathway name.

@ Average fold difference of expression between SHS-SP vs. control MSC.

# Gene number in a gene module.

♦ p-value for pathway enrichment of tested gene sample.

♥ q-value for pathway enrichment of tested gene sample (please see footnote).

& Genes are ranked according to the effect strength (induction for induced, inhibition for inhibited).

| Pathway*                                                                          | Pathway name**             | Fold difference@ | Gene number # | p-value♦ | q-value♥ | Gene Symbols&                                                                                                                                                                                                                                                                                                                                                                                                                                                                                                                                                                                                                                                                                                                                      |
|-----------------------------------------------------------------------------------|----------------------------|------------------|---------------|----------|----------|----------------------------------------------------------------------------------------------------------------------------------------------------------------------------------------------------------------------------------------------------------------------------------------------------------------------------------------------------------------------------------------------------------------------------------------------------------------------------------------------------------------------------------------------------------------------------------------------------------------------------------------------------------------------------------------------------------------------------------------------------|
| <b>DNA repair related gene modules that are induced in SHS-SP vs. control MSC</b> |                            |                  |               |          |          |                                                                                                                                                                                                                                                                                                                                                                                                                                                                                                                                                                                                                                                                                                                                                    |
| GO:0006289                                                                        | Nucleotide-excision repair | 2.841            | 74            | 1.15E-04 | 0.07     | PARP1; POLR2A; COPS6; SUMO3; RAD23A; RFC1; POLR2H; POLL; POLR2J; ERCC2; UBE2I; UBE2V2; POLD3; COPS3; POLE; COPS8; NEIL3; POLR2K; CHD1L; PNKP; HMG1; SUMO2; COPS2; RPA2; TCEA1; SUMO1; POLR2F; ERCC3; RAD23B; POLR2E; RBBP8; TP53; MMS19; RPA1; POLR2L; PRPF19; PCNA; CETN2; RPS27A; GPS1; CUL4A; UBA52; POLR2I; COPS7A; UBB; UBC; POLR2D; NEIL2; POLD2; USP7; CUL4B; DDB1; XAB2; GTF2H5; UBE2N; RBX1; RFC2; POLR2C; COPS4; GTF2H3; COPS7B; POLD4; COPS5; ATXN3; HUS1; SLX4; ERCC4; ISY1; SIRT1; AQR; GTF2H4; CCNH; POLK; CDK7                                                                                                                                                                                                                      |
| GO:0006281                                                                        | DNA repair                 | 1.87             | 273           | 1.18E-04 | 0.05     | PARP1; POLR2A; SFPQ; PPP5C; RUVBL2; COPS6; SUMO3; UFD1; KIF22; RAD23A; HELB; UBE2L6; RFC1; POLR2H; TRIP12; USP47; POLL; UBE2A; POLR2J; CIB1; ERCC2; UBE2I; TRIM25; UBE2V2; FOXM1; UPF1; POLD3; COPS3; MC1R; USP28; POLE; COPS8; SEM1; NEIL3; TP53BP1; CHAF1B; POLR2K; XRCC4; TDG; ASCC2; PNKP; CHD1L; TDP1; MRNIP; NEXMIF; CDC45; REV1; KDM2A; HMG1; UHRF1; RMI2; INO80C; PAGR1; NSMCE1; CENPS; DTL; GINS2; SUMO2; FANCI; COPS2; ALKBH1; PALB2; RECQL4; NCOA6; RPA2; WDR48; FAAP20; RPA1; YY1; ABRAXAS1; TCEA1; HELQ; SUMO1; EYA2; SETD2; MEN1; EYA4; FBXO18; HMGB2; TOPBP1; POLR2F; SMC1A; ERCC3; RUVBL1; NUDT1; RAD21; POLM; ALKBH5; UBE2V1; ASCC1; RHNO1; FAAP100; PTTG1; ATRX; MUS81; TTC5; RBM14; SWI5; AP5S1; MUM1; SSRP1; SMC3; GEN1; POLG; |

|                                          |                                                   |      |    |          |      |                                                                                                                                                                                                                                                                                                                                                                                                                                                                                                                                                                                                                                                                                                                                                                                                                                                                                                                                                                                                                                                                                                                                                                                                                               |
|------------------------------------------|---------------------------------------------------|------|----|----------|------|-------------------------------------------------------------------------------------------------------------------------------------------------------------------------------------------------------------------------------------------------------------------------------------------------------------------------------------------------------------------------------------------------------------------------------------------------------------------------------------------------------------------------------------------------------------------------------------------------------------------------------------------------------------------------------------------------------------------------------------------------------------------------------------------------------------------------------------------------------------------------------------------------------------------------------------------------------------------------------------------------------------------------------------------------------------------------------------------------------------------------------------------------------------------------------------------------------------------------------|
|                                          |                                                   |      |    |          |      | RAD23B; NUCKS1; POLR2E; WRNIP1; TRIP13; MORF4L1; IGHMBP2; RBBP8; UBR5; INTS3; TP53; DCLRE1C; SUPT16H; MMS19; UIMC1; UCHL5; TFPT; NABP2; KAT5; RPA1; POLR2L; PRPF19; PCNA; OTUB1; CETN2; RPS27A; XRCC5; GPS1; CUL4A; SMC5; UBE2B; UBA52; ISG15; RPS27L; POLR2I; HUWE1; HSF1; ZBTB1; BABAM1; APEX1; HMGB1; XRCC6; RAD54L; NONO; PIAS4; COPS7A; CDCA5; PRKDC; UBB; RPS3; UBC; TREX1; H2AFX; TOP3A; MORF4L2; VCP; POLR2D; NEIL2; NPM1; HMGA1; USP1; POLD2; USP7; PCLAF; DDX1; CUL4B; BAZ1B; TAOK1; DDB1; SFR1; XAB2; PARPBP; GTF2H5; UBE2N; RBX1; DOT1L; POLH; XRCC2; MPG; RFC2; POLR2C; MCRS1; TRIM28; TONSL; DTX3L; SMG1; HERC2; COPS4; MAD2L2; SETMAR; GTF2H3; COPS7B; USP10; FTO; BRIP1; POLD4; KIN; RAD1; MMS22L; FBXO6; PSMD14; COPS5; ANKLE1; UBE2T; BRCA1; FANCF; SWSAP1; CLSPN; ATXN3; TDP2; GINS4; AP5Z1; HUS1; FAAP24; FANCG; FEN1; ATR; INO80E; INIP; RAD54B; ZSWIM7; RAD9A; MTA1; SLX4; RNF168; HMGA2; ERCC4; MSH3; ATM; NPLOC4; CHEK1; ISY1; MCMDC2; NHEJ1; SETX; STUB1; RAD17; CENPX; CEP164; APBB1; NSMCE2; SIRT1; TNKS1BP1; CHRNA4; AQR; GADD45A; NSD2; FZR1; RAD18; RNF8; GTF2H4; NSMCE3; PARP4; CCNH; MARF1; USP43; UBE2D3; APLF; REV3L; SMARCB1; POLK; ZFYVE26; CHAF1A; APTX; RNF138; PDS5A; REC8; CDK7; MLH3 |
| GO:0006284                               | Base-excision repair                              | 6.09 | 19 | 1.04E-03 | 0.05 | USP47; POLL; POLE; NEIL3; TDG; RECQL4; RPA2; POLG; TP53; RPA1; HUWE1; APEX1; NEIL2; HMGA1; MPG; HMGA2; HMGA1; DNA2; NEIL1                                                                                                                                                                                                                                                                                                                                                                                                                                                                                                                                                                                                                                                                                                                                                                                                                                                                                                                                                                                                                                                                                                     |
| GO:0051106                               | DNA ligation involved in DNA repair               | 27.7 | 5  | 1.24E-03 | 0.08 | PARP1; XRCC4; HMGB2; HMGB1; LIG4                                                                                                                                                                                                                                                                                                                                                                                                                                                                                                                                                                                                                                                                                                                                                                                                                                                                                                                                                                                                                                                                                                                                                                                              |
| 1309112__RE<br>ACTOME__R-<br>HSA-5696399 | Global Genome Nucleotide Excision Repair (GG-NER) | 4.19 | 56 | 1.26E-03 | 0.08 | PARP1; COPS6; POLE4; SUMO3; RAD23A; RFC1; ERCC2; UBE2I; UBE2V2; POLD3; COPS3; POLE; COPS8; CHD1L; INO80C; SUMO2; COPS2; RPA2; YY1; SUMO1; ERCC3; RUVBL1; RAD23B; TFPT; RPA1; PCNA; POLE3; CETN2; RPS27A; GPS1; ACTB; CUL4A; UBA52; PIAS3; COPS7A; UBB; UBC; POLD2; CUL4B; DDB1; GTF2H5; UBE2N; RBX1; RFC2; MCRS1; COPS4; GTF2H3; COPS7B; POLD4; COPS5; INO80E; ERCC4; GTF2H4; CCNH; POLK; CDK7                                                                                                                                                                                                                                                                                                                                                                                                                                                                                                                                                                                                                                                                                                                                                                                                                                |
| 1309111__RE<br>ACTOME__R-<br>HSA-5696398 | Nucleotide Excision Repair                        | 3.31 | 73 | 1.31E-03 | 0.06 | PARP1; POLR2A; COPS6; POLE4; SUMO3; RAD23A; RFC1; POLR2H; POLR2J; ERCC2; UBE2I; UBE2V2; POLD3; COPS3; POLE; COPS8; POLR2K; CHD1L; HMGN1; INO80C; SUMO2; COPS2; RPA2; YY1;                                                                                                                                                                                                                                                                                                                                                                                                                                                                                                                                                                                                                                                                                                                                                                                                                                                                                                                                                                                                                                                     |

|                                          |                                                                      |      |     |          |      |                                                                                                                                                                                                                                                                                                                                                                                                                                                                                                                                                                                                                                                                                                                                                                                                                                                                                                                                                                                                                                                                                                                                                                         |
|------------------------------------------|----------------------------------------------------------------------|------|-----|----------|------|-------------------------------------------------------------------------------------------------------------------------------------------------------------------------------------------------------------------------------------------------------------------------------------------------------------------------------------------------------------------------------------------------------------------------------------------------------------------------------------------------------------------------------------------------------------------------------------------------------------------------------------------------------------------------------------------------------------------------------------------------------------------------------------------------------------------------------------------------------------------------------------------------------------------------------------------------------------------------------------------------------------------------------------------------------------------------------------------------------------------------------------------------------------------------|
|                                          |                                                                      |      |     |          |      | TCEA1; SUMO1; POLR2F; ERCC3; RUVBL1; RAD23B; POLR2E; TFPT; RPA1; POLR2L; PRPF19; PCNA; POLE3; CETN2; RPS27A; GPS1; ACTB; CUL4A; UBA52; PIAS3; POLR2I; COPS7A; UBB; UBC; POLR2D; POLD2; USP7; CUL4B; DDB1; XAB2; GTF2H5; UBE2N; RBX1; RFC2; POLR2C; MCRS1; COPS4; GTF2H3; COPS7B; POLD4; COPS5; INO80E; ERCC4; ISY1; AQR; GTF2H4; CCNH; POLK; CDK7                                                                                                                                                                                                                                                                                                                                                                                                                                                                                                                                                                                                                                                                                                                                                                                                                       |
| 1270350__RE<br>ACTOME__R-<br>HSA-73894   | DNA Repair                                                           | 2.15 | 164 | 1.36E-03 | 0.07 | PARP1; POLR2A; PPP5C; COPS6; POLE4; SUMO3; UFD1; RAD23A; UBE2L6; RFC1; POLR2H; PPP4C; POLL; POLR2J; ERCC2; UBE2I; TRIM25; UBE2V2; POLD3; COPS3; POLE; COPS8; TP53BP1; POLR2K; TDG; XRCC4; ASCC2; PNKP; CHD1L; TDP1; REV1; HMG1; RMI2; INO80C; CENPS; DTL; BAP1; SUMO2; FANCI; COPS2; PALB2; RPA2; FAAP20; YY1; ABRAXAS1; TCEA1; SUMO1; EYA2; EYA4; TOPBP1; POLR2F; ERCC3; RNF4; RUVBL1; POLM; ALKBH5; ASCC1; RHNO1; FAAP100; MUS81; KPNA2; GEN1; RAD23B; POLR2E; RBBP8; TP53; DCLRE1C; UIMC1; TFPT; KAT5; RPA1; POLR2L; PRPF19; PCNA; POLE3; CETN2; RPS27A; XRCC5; GPS1; ACTB; CUL4A; UBE2B; UBA52; ISG15; PIAS3; POLR2I; CCNA2; BABAM1; APEX1; XRCC6; PIAS4; COPS7A; PRKDC; UBB; UBC; H2AFX; TOP3A; VCP; POLR2D; NEIL2; TIMELESS; USP1; POLD2; USP7; PCLAF; CUL4B; BAZ1B; DDB1; XAB2; GTF2H5; UBE2N; RBX1; POLH; XRCC2; MPG; RFC2; POLR2C; MCRS1; HERC2; COPS4; MAD2L2; GTF2H3; KDM4B; COPS7B; USP10; FTO; BRIP1; POLD4; RAD1; COPS5; UBE2T; BRCA1; FANCF; CLSPN; TDP2; HUS1; FAAP24; FANCG; FEN1; ATR; INO80E; RAD9A; SLX4; RNF168; ERCC4; MSH3; ATM; NPLOC4; CHEK1; ISY1; NHEJ1; RAD17; CENPX; APBB1; AQR; NSD2; RAD18; RNF8; GTF2H4; CCNH; USP43; REV3L; POLK; CDK7 |
| 1270351__RE<br>ACTOME__R-<br>HSA-73884   | Base Excision<br>Repair; Resolution<br>of Abasic Sites<br>(AP sites) | 6.22 | 18  | 1.42E-03 | 0.07 | PARP1; POLE4; RFC1; POLD3; POLE; TDG; PNKP; RPA2; RPA1; PCNA; POLE3; APEX1; NEIL2; POLD2; MPG; RFC2; POLD4; FEN1                                                                                                                                                                                                                                                                                                                                                                                                                                                                                                                                                                                                                                                                                                                                                                                                                                                                                                                                                                                                                                                        |
| 1268744__RE<br>ACTOME__R-<br>HSA-3108214 | SUMOylation of<br>DNA damage<br>response and<br>repair proteins      | 2.93 | 47  | 1.54E-03 | 0.07 | PARP1; SUMO3; RING1; PML; PHC1; UBE2I; POM121C; TPR; TDG; XRCC4; RANBP2; NUP153; CDKN2A; NSMCE1; SCMH1; SUMO2; NUP85; PHC2; NDC1; SUMO1; NUP88; SMC1A; NUP98; RAD21; SMC3; NUP62; RPA1; CETN2; SMC5; PIAS4; NUP58; HDAC7; NUP93; HERC2; PIAS2; PHC3; CBX4; BRCA1; RNF168; NSMCE2; NUP35; SEH1L; NUP50; NSMCE3; NUP210; NUP188; CBX8                                                                                                                                                                                                                                                                                                                                                                                                                                                                                                                                                                                                                                                                                                                                                                                                                                     |
| 83043__KEGG<br>__hsa03410                | Base excision<br>repair                                              | 4.24 | 17  | 1.62E-03 | 0.08 | PARP1; POLE4; POLL; POLD3; POLE; NEIL3; TDG; PCNA; POLE3; APEX1;                                                                                                                                                                                                                                                                                                                                                                                                                                                                                                                                                                                                                                                                                                                                                                                                                                                                                                                                                                                                                                                                                                        |

|                                                                                                  |                                                                                   |        |    |          |      |                                                                                                                                                                                                                                                                                                                                                                                                                                                                                       |
|--------------------------------------------------------------------------------------------------|-----------------------------------------------------------------------------------|--------|----|----------|------|---------------------------------------------------------------------------------------------------------------------------------------------------------------------------------------------------------------------------------------------------------------------------------------------------------------------------------------------------------------------------------------------------------------------------------------------------------------------------------------|
|                                                                                                  |                                                                                   |        |    |          |      | HMGB1; NEIL2; POLD2; MPG; POLD4; FEN1; PARP4                                                                                                                                                                                                                                                                                                                                                                                                                                          |
| 83047__KEGG_hsa03450                                                                             | Non-homologous end-joining                                                        | 2.92   | 11 | 1.73E-03 | 0.08 | POLL; XRCC4; DNTT; POLM; DCLRE1C; XRCC5; XRCC6; PRKDC; FEN1; NHEJ1; LIG4                                                                                                                                                                                                                                                                                                                                                                                                              |
| <b>DNA recombination and repair related gene modules that are inhibited in SHS-SP vs control</b> |                                                                                   |        |    |          |      |                                                                                                                                                                                                                                                                                                                                                                                                                                                                                       |
| GO:0016444                                                                                       | Somatic cell DNA recombination                                                    | -4.96  | 19 | 1.21E-03 | 0.06 | EXOSC3; RNF8; RAG2; ATM; EXO1; MLH11; HSPD1; EXOSC6; RNF168; AICDA; TCF3; BCL11B; CCR6; HSPD1; SWAP70; PRKDC; HMGB1; DCLRE1C; HMGB2                                                                                                                                                                                                                                                                                                                                                   |
| GO:0007131                                                                                       | Reciprocal meiotic recombination                                                  | -4.35  | 21 | 2.21E-03 | 0.07 | MLH3; REC8; CENPX; MCMDC2; ATM; ERCC4; SLX4; KLHDC3; RAD54B; BRIP1; XRCC2; TOP2A; UBE2B; TOP2B; TRIP13; MUS81; RAD21; CENPS; DMC1; MRE11A; MEIOB                                                                                                                                                                                                                                                                                                                                      |
| GO:0035825                                                                                       | Reciprocal DNA recombination                                                      | -4.35  | 21 | 2.21E-03 | 0.07 | MLH3; REC8; CENPX; MCMDC2; ATM; ERCC4; SLX4; KLHDC3; RAD54B; BRIP1; XRCC2; TOP2A; UBE2B; TOP2B; TRIP13; MUS81; RAD21; CENPS; DMC1; MRE11A; MEIOB                                                                                                                                                                                                                                                                                                                                      |
| GO:0045911                                                                                       | Positive regulation of DNA recombination                                          | -4.89  | 13 | 2.29E-03 | 0.07 | EXOSC3; IL2; NSD2; TFRC; TNFSF4; EXOSC6; TGFB1; UBE2B; STAT6; MRNIP; IL4; WHSC1; TNFSF13                                                                                                                                                                                                                                                                                                                                                                                              |
| GO:0015074                                                                                       | DNA integration                                                                   | -11.28 | 7  | 2.65E-03 | 0.09 | SMARCB1; NYNRIN; SETMAR; BANF1; RLF; ZBED9; THAP9                                                                                                                                                                                                                                                                                                                                                                                                                                     |
| GO:0010792                                                                                       | DNA double-strand break processing involved in repair via single-strand annealing | -12.06 | 5  | 3.89E-03 | 0.09 | RNF138; SLX4; RBBP8; RAD52; SLX1B                                                                                                                                                                                                                                                                                                                                                                                                                                                     |
| GO:0045002                                                                                       | double-strand break repair via single-strand annealing                            | -12.06 | 5  | 3.89E-03 | 0.09 | RNF138; SLX4; RBBP8; RAD52; SLX1B                                                                                                                                                                                                                                                                                                                                                                                                                                                     |
| 1309097__REACTOME__R-HSA-5693548                                                                 | Sensing of DNA Double Strand Breaks                                               | -2.46  | 5  | 4.21E-03 | 0.09 | ATM; KAT5; KPNA2; MRE11A; RAD50                                                                                                                                                                                                                                                                                                                                                                                                                                                       |
| 198890__Wiki Pathways__WP186                                                                     | Homologous recombination                                                          | -1.85  | 8  | 6.32E-03 | 0.09 | ATM; RAD54B; POLD4; POLD2; RPA1; POLD3; MRE11A; RAD54L; MUS81; NBN; EME1                                                                                                                                                                                                                                                                                                                                                                                                              |
| homolog_DNA rep_NC'14_Down                                                                       | Homologous recombination DNA repair signature (Peng et al 2014)                   | -1.48  | 71 | 3.28E-03 | 0.06 | SHCBP1; CSE1L; SUV39H1; CHAF1A; AURKB; AADAT; NCAPD3; HELLS; GJB2; TK1; KIF11; FDPS; CHEK1; HMGB3; ANLN; RAD54B; DEPDC1; FEN1; MTBP; CHRNA5; AHS1; GINS4; BRCA1; POLA2; E2F2; KIF14; C1QTNF6; EFHD2; DHFR; MSX1; TIMELESS; WDHD1; CDCA5; MCM2; RAD54L; CDCA3; CCNA2; TMEM158; DPYSL3; TYMS; PCNA; RRM2; MRTO4; DNMT1; CTSC; TRIP13; POLR3K; DUT; TACC3; RECQL4; SLC25A10; MCM3; CCNB1; FANCI; GINS2; INSIG1; UHRF1; C1orf112; PRPF38A; CHAF1B; NEIL3; MCM5; TUBA4A; NETO2; MCM7; SFPQ |
| 1108230__KEGG__M00691                                                                            | DNA damage-induced cell cycle checkpoints                                         | -4.92  | 5  | 7.63E-03 | 0.09 | CHEK1; ATM; ATR; CDC25C; CDC25A                                                                                                                                                                                                                                                                                                                                                                                                                                                       |

Footnote. We used  $q < 0.1$ . In the literature  $q$ -value up to 0.15 is used (e.g., Seemann et al. 2012; Koo et al. 2014; Riester et al. 2014; Morrow et al. 2015; Vazquez-Martin et al. 2016; Coarfa et al. 2017).

Coarfa C., et al. 2017. Sexual dimorphism of the pulmonary transcriptome in neonatal hyperoxic lung injury: identification of angiogenesis as a key pathway. *Am. J. Physiol.* 313: L991-L1005.

Koo I. et al. 2014. Comparative analysis of false discovery rate methods in constructing metabolic association networks. *J Bioinform. Comput. Biol.* 12: 1450018.

Morrow J.D. et al. 2015. Identifying a gene expression signature of frequent COPD exacerbations in peripheral blood using network methods. *BMC Med. Genomics.* 8: 1.

Riester M. et al. 2014. Integrative analysis of 1q23.3 copy-number gain in metastatic urothelial carcinoma. *Clin. Cancer Res.* 20: 1873-83.

Seemann S.E. et al. 2012. Transcripts with in silico predicted RNA structure are enriched everywhere in the mouse brain. *BMC Genomics* 13: 214.

Vazquez-Martin A. et al. 2016. Somatic polyploidy is associated with the upregulation of c-MYC interacting genes and EMT-like signature. *Oncotarget* 7: 75235–75260.
