# Supplementary material for: Cytogenetic and Transcriptomic Analysis of Human Endometrial MSC Retaining Proliferative Activity after Sublethal Heat Shock
Source: MDPI journal article supplement (doi:10.3390/cells7110184), 2018-10-25
Supplement: s1 [file s1]

**Supplementary Table 5. The pathways enriched in switched-off DNA repair genes.**

GeneN - the observed number of genes belonging to a pathway in the switched-off genes.  
Ratio - the ratio of observed to expected numbers of genes belonging to a pathway in the switched-off genes.

| Pathway ID                           | Pathway Name                                                               | GeneN | Ratio | p-value  | q-value  | Gene list                                                                                                                                                                                      |
|--------------------------------------|----------------------------------------------------------------------------|-------|-------|----------|----------|------------------------------------------------------------------------------------------------------------------------------------------------------------------------------------------------|
| 1270350__REACTOME__R-<br>HSA-73894   | DNA Repair                                                                 | 24    | 14.55 | 4.26E-22 | 4.38E-19 | REV3L; NSD2; MRE11; FANCG; MUS81; RAD50; RAD9A; RNF8; BRCA2; AQR; RNF168; POLM; FEN1; RAD17; FAAP24; APBB1; CDK7; CHEK1; NBN; USP43; GTF2H4; PALB2; RAD18; CHEK2                               |
| 1269741__REACTOME__R-<br>HSA-1640170 | Cell Cycle                                                                 | 28    | 8.11  | 8.53E-19 | 6.58E-16 | GIN54; NUP35; NSD2; MRE11; NUP210; REC8; GINS2; AURKB; RAD50; MCPH1; RAD9A; RNF8; BRCA2; PDS5A; MLH3; CEP164; RNF168; FEN1; RAD17; NUP50; NCAPD3; CDK7; CHEK1; SEH1L; NUP188; NBN; FZR1; CHEK2 |
| 1309095__REACTOME__R-<br>HSA-5693532 | DNA Double-Strand Break Repair                                             | 16    | 19.29 | 6.71E-17 | 3.45E-14 | NSD2; MRE11; MUS81; RAD50; RAD9A; RNF8; BRCA2; POLM; RNF168; FEN1; RAD17; APBB1; CHEK1; NBN; CHEK2; PALB2                                                                                      |
| 1309099__REACTOME__R-<br>HSA-5693538 | Homology Directed Repair                                                   | 13    | 20.43 | 3.12E-14 | 1.37E-11 | RNF168; FEN1; RAD17; NSD2; MRE11; MUS81; RAD50; CHEK1; RAD9A; RNF8; BRCA2; NBN; PALB2                                                                                                          |
| 1309100__REACTOME__R-<br>HSA-5693567 | HDR through Homologous Recombination (HR) or Single Strand Annealing (SSA) | 12    | 19.44 | 6.11E-13 | 2.36E-10 | RNF168; RAD17; NSD2; MRE11; MUS81; RAD50; CHEK1; RAD9A; BRCA2; RNF8; NBN; PALB2                                                                                                                |
| 1268743__REACTOME__R-<br>HSA-3108232 | SUMO E3 ligases SUMOylate target proteins                                  | 12    | 18.30 | 1.31E-12 | 4.51E-10 | RNF168; NUP35; TOP2B; NUP50; NUP210; AURKB; NSMCE1; CBX8; MTA1; NUP188; SEH1L; NSMCE3                                                                                                          |
| 1268738__REACTOME__R-<br>HSA-2990846 | SUMOylation                                                                | 12    | 17.28 | 2.69E-12 | 8.30E-10 | RNF168; NUP35; TOP2B; NUP50; NUP210; AURKB; NSMCE1; CBX8; MTA1; NUP188; SEH1L; NSMCE3                                                                                                          |
| 1269754__REACTOME__R-<br>HSA-69473   | G2/M DNA damage checkpoint                                                 | 10    | 23.05 | 9.54E-12 | 2.68E-09 | RNF168; RAD17; NSD2; MRE11; CHEK1; RAD50; RAD9A; RNF8; NBN; CHEK2                                                                                                                              |
| 1309103__REACTOME__R-<br>HSA-5693579 | Homologous DNA Pairing and Strand Exchange                                 | 8     | 31.91 | 7.13E-11 | 1.83E-08 | RAD50; CHEK1; RAD9A; RAD17; BRCA2; NBN; MRE11; PALB2                                                                                                                                           |
| 1309102__REACTOME__R-<br>HSA-5685942 | HDR through Homologous Recombination (HRR)                                 | 9     | 21.71 | 1.98E-10 | 4.70E-08 | RAD17; MRE11; MUS81; CHEK1; RAD50; RAD9A; BRCA2; NBN; PALB2                                                                                                                                    |
| 1309101__REACTOME__R-<br>HSA-5693607 | Processing of DNA double-strand break ends                                 | 9     | 20.29 | 3.78E-10 | 7.77E-08 | RNF168; RAD17; NSD2; MRE11; CHEK1; RAD50; RAD9A; RNF8; NBN                                                                                                                                     |
| 1268744__REACTOME__R-<br>HSA-3108214 | SUMOylation of DNA damage response and repair proteins                     | 9     | 19.44 | 5.66E-10 | 1.09E-07 | RNF168; NUP35; NUP50; NUP210; NSMCE1; CBX8; NUP188; SEH1L; NSMCE3                                                                                                                              |

|                                                  |                                                                                                           |    |       |          |          |                                                                       |
|--------------------------------------------------|-----------------------------------------------------------------------------------------------------------|----|-------|----------|----------|-----------------------------------------------------------------------|
| 1309098__REACTOME__R-<br>HSA-5693565             | Recruitment and ATM-mediated phosphorylation of repair and signaling proteins at DNA double strand breaks | 8  | 25.14 | 6.00E-10 | 1.09E-07 | RNF168; NSD2; MRE11; APBB1; RAD50; RNF8; NBN; CHEK2                   |
| 1309096__REACTOME__R-<br>HSA-5693606             | DNA Double Strand Break Response                                                                          | 8  | 24.40 | 7.79E-10 | 1.34E-07 | RNF168; NSD2; MRE11; APBB1; RAD50; RNF8; NBN; CHEK2                   |
| 1458202__WikiPathways__<br>WP3878                | ATM Signaling Network in Development and Disease                                                          | 8  | 23.70 | 1.00E-09 | 1.63E-07 | RNF168; MRE11; AURKB; CHEK1; RAD50; RNF8; NBN; CHEK2                  |
| 1309104__REACTOME__R-<br>HSA-5693616             | Presynaptic phase of homologous DNA pairing and strand exchange                                           | 7  | 29.04 | 2.49E-09 | 3.84E-07 | RAD50; CHEK1; RAD9A; RAD17; BRCA2; NBN; MRE11                         |
| 454__KEGG__ko03440;<br>83046__KEGG__hsa03440     | Homologous recombination                                                                                  | 7  | 27.92 | 3.38E-09 | 4.97E-07 | RAD50; BRCA2; RAD54L; NBN; MRE11; MUS81; PALB2                        |
| 377128__KEGG__ko03460;<br>377262__KEGG__hsa03460 | Fanconi anemia pathway                                                                                    | 7  | 26.89 | 4.53E-09 | 6.35E-07 | WDR48; REV3L; BRCA2; FAAP24; FANCG; MUS81; PALB2                      |
| 920969__WikiPathways__<br>WP2516                 | ATM Signaling Pathway                                                                                     | 7  | 25.03 | 7.84E-09 | 1.01E-06 | RAD50; CHEK1; RAD9A; NBN; MRE11; CHEK2; GADD45A                       |
| 1309110__REACTOME__R-<br>HSA-5693571             | Nonhomologous End-Joining (NHEJ)                                                                          | 7  | 25.03 | 7.84E-09 | 1.01E-06 | RNF168; POLM; RAD50; RNF8; NSD2; NBN; MRE11                           |
| 198788__WikiPathways__<br>WP707                  | DNA Damage Response                                                                                       | 8  | 18.44 | 8.49E-09 | 1.05E-06 | RAD17; MRE11; GADD45A; CHEK1; RAD50; RAD9A; NBN; CHEK2                |
| 1309105__REACTOME__R-<br>HSA-5693537             | Resolution of D-Loop Structures                                                                           | 6  | 34.57 | 1.13E-08 | 1.29E-06 | RAD50; BRCA2; NBN; MRE11; MUS81; PALB2                                |
| 1309106__REACTOME__R-<br>HSA-5693568             | Resolution of D-loop Structures through Holliday Junction Intermediates                                   | 6  | 34.57 | 1.13E-08 | 1.29E-06 | RAD50; BRCA2; NBN; MRE11; MUS81; PALB2                                |
| 1339113__REACTOME__R-<br>HSA-4615885             | SUMOylation of DNA replication proteins                                                                   | 7  | 23.42 | 1.30E-08 | 1.43E-06 | SEH1L; NUP188; NUP35; TOP2B; NUP50; NUP210; AURKB                     |
| 920989__WikiPathways__<br>WP1530                 | miRNA Regulation of DNA Damage Response                                                                   | 8  | 17.28 | 1.45E-08 | 1.55E-06 | RAD17; MRE11; GADD45A; CHEK1; RAD50; RAD9A; NBN; CHEK2                |
| 219801__WikiPathways__<br>WP1984                 | Integrated Breast Cancer Pathway                                                                          | 10 | 10.69 | 2.51E-08 | 2.59E-06 | PTEN; SIRT1; RAD54L; MRE11; CDK7; GADD45A; CHEK1; RAD50; BRCA2; CHEK2 |
| 1269753__REACTOME__R-<br>HSA-69481               | G2/M Checkpoints                                                                                          | 10 | 10.17 | 4.10E-08 | 3.95E-06 | RNF168; RAD17; NSD2; MRE11; CHEK1; RAD50; RAD9A; RNF8; NBN; CHEK2     |
| 1383080__REACTOME__R-<br>HSA-6804756             | Regulation of TP53 Activity through Phosphorylation                                                       | 8  | 13.83 | 8.97E-08 | 8.39E-06 | RAD17; MRE11; AURKB; CHEK1; RAD50; RAD9A; NBN; CHEK2                  |

|                                      |                                                                                         |    |        |          |          |                                                                                                          |
|--------------------------------------|-----------------------------------------------------------------------------------------|----|--------|----------|----------|----------------------------------------------------------------------------------------------------------|
| 1269763__REACTOME__R-<br>HSA-69278   | Cell Cycle, Mitotic                                                                     | 15 | 5.27   | 1.08E-07 | 9.76E-06 | GIN54; FEN1; NUP35; NUP50; NCAPD3; NUP210; CDK7; GINS2; AURKB; SEH1L; MCPH1; NUP188; FZR1; PDS5A; CEP164 |
| 1309109__REACTOME__R-<br>HSA-5685939 | HDR through MMEJ (alt-NHEJ)                                                             | 4  | 69.14  | 1.19E-07 | 1.05E-05 | RAD50; FEN1; NBN; MRE11                                                                                  |
| 1309107__REACTOME__R-<br>HSA-5693554 | Resolution of D-loop Structures through Synthesis-<br>Dependent Strand Annealing (SDSA) | 5  | 34.57  | 2.05E-07 | 1.75E-05 | RAD50; BRCA2; NBN; MRE11; PALB2                                                                          |
| 1269742__REACTOME__R-<br>HSA-69620   | Cell Cycle Checkpoints                                                                  | 10 | 8.57   | 2.10E-07 | 1.75E-05 | RNF168; RAD17; NSD2; MRE11; CHEK1; RAD50; RAD9A; RNF8; NBN; CHEK2                                        |
| 1339112__REACTOME__R-<br>HSA-4570464 | SUMOylation of RNA binding proteins                                                     | 6  | 21.46  | 2.65E-07 | 2.15E-05 | CBX8; SEH1L; NUP188; NUP35; NUP50; NUP210                                                                |
| 1269922__REACTOME__R-<br>HSA-170822  | Regulation of Glucokinase by Glucokinase Regulatory<br>Protein                          | 5  | 32.41  | 2.96E-07 | 2.34E-05 | SEH1L; NUP188; NUP35; NUP50; NUP210                                                                      |
| 1269654__REACTOME__R-<br>HSA-3700989 | Transcriptional Regulation by TP53                                                      | 13 | 5.59   | 4.28E-07 | 3.22E-05 | PTEN; RAD17; MRE11; CDK7; AURKB; GADD45A; RAD50; CHEK1; RAD9A; NBN; GTF2H4; TNKS1BP1; CHEK2              |
| 1269123__REACTOME__R-<br>HSA-168333  | NEP/NS2 Interacts with the Cellular Export Machinery                                    | 5  | 28.81  | 5.72E-07 | 3.92E-05 | SEH1L; NUP188; NUP35; NUP50; NUP210                                                                      |
| 1269866__REACTOME__R-<br>HSA-912446  | Meiotic recombination                                                                   | 5  | 28.81  | 5.72E-07 | 3.92E-05 | RAD50; BRCA2; NBN; MRE11; MLH3                                                                           |
| 1269114__REACTOME__R-<br>HSA-168271  | Transport of Ribonucleoproteins into the Host<br>Nucleus                                | 5  | 28.81  | 5.72E-07 | 3.92E-05 | SEH1L; NUP188; NUP35; NUP50; NUP210                                                                      |
| 1269121__REACTOME__R-<br>HSA-168274  | Export of Viral Ribonucleoproteins from Nucleus                                         | 5  | 28.81  | 5.72E-07 | 3.92E-05 | SEH1L; NUP188; NUP35; NUP50; NUP210                                                                      |
| 1269865__REACTOME__R-<br>HSA-1500620 | Meiosis                                                                                 | 6  | 18.30  | 7.23E-07 | 4.80E-05 | RAD50; BRCA2; NBN; MRE11; REC8; MLH3                                                                     |
| 413426__KEGG__hsa_M00<br>291;        | MRN complex                                                                             | 3  | 103.70 | 8.64E-07 | 5.56E-05 | RAD50; NBN; MRE11                                                                                        |
| 890552__KEGG__M00291                 |                                                                                         |    |        |          |          |                                                                                                          |
| 1269817__REACTOME__R-<br>HSA-3301854 | Nuclear Pore Complex (NPC) Disassembly                                                  | 5  | 25.93  | 1.02E-06 | 6.05E-05 | SEH1L; NUP188; NUP35; NUP50; NUP210                                                                      |
| 1269094__REACTOME__R-<br>HSA-180910  | Vpr-mediated nuclear import of PICs                                                     | 5  | 25.93  | 1.02E-06 | 6.05E-05 | SEH1L; NUP188; NUP35; NUP50; NUP210                                                                      |
| 1269096__REACTOME__R-<br>HSA-180746  | Nuclear import of Rev protein                                                           | 5  | 25.93  | 1.02E-06 | 6.05E-05 | SEH1L; NUP188; NUP35; NUP50; NUP210                                                                      |
| 1269697__REACTOME__R-<br>HSA-159227  | Transport of the SLBP independent Mature mRNA                                           | 5  | 25.93  | 1.02E-06 | 6.05E-05 | SEH1L; NUP188; NUP35; NUP50; NUP210                                                                      |

|                                                   |                                                                |   |       |          |          |                                                         |
|---------------------------------------------------|----------------------------------------------------------------|---|-------|----------|----------|---------------------------------------------------------|
| 1269085__REACTOME__R-<br>HSA-165054               | Rev-mediated nuclear export of HIV RNA                         | 5 | 24.69 | 1.33E-06 | 7.45E-05 | SEH1L; NUP188; NUP35; NUP50; NUP210                     |
| 1269696__REACTOME__R-<br>HSA-159230               | Transport of the SLBP Dependant Mature mRNA                    | 5 | 24.69 | 1.33E-06 | 7.45E-05 | SEH1L; NUP188; NUP35; NUP50; NUP210                     |
| 470351__KEGG__hsa_M00427;<br>890636__KEGG__M00427 | Nuclear pore complex                                           | 5 | 23.57 | 1.70E-06 | 9.39E-05 | SEH1L; NUP188; NUP35; NUP50; NUP210                     |
| 1269092__REACTOME__R-<br>HSA-176033               | Interactions of Vpr with host cellular proteins                | 5 | 22.54 | 2.16E-06 | 1.11E-04 | SEH1L; NUP188; NUP35; NUP50; NUP210                     |
| 1269131__REACTOME__R-<br>HSA-168276               | NS1 Mediated Effects on Host Pathways                          | 5 | 22.54 | 2.16E-06 | 1.11E-04 | SEH1L; NUP188; NUP35; NUP50; NUP210                     |
| 1309108__REACTOME__R-<br>HSA-5685938              | HDR through Single Strand Annealing (SSA)                      | 5 | 22.54 | 2.16E-06 | 1.11E-04 | RAD50; RAD9A; RAD17; NBN; MRE11                         |
| 1269095__REACTOME__R-<br>HSA-177243               | Interactions of Rev with host cellular proteins                | 5 | 22.54 | 2.16E-06 | 1.11E-04 | SEH1L; NUP188; NUP35; NUP50; NUP210                     |
| 198890__WikiPathways__<br>WP186                   | Homologous recombination                                       | 4 | 37.71 | 2.52E-06 | 1.27E-04 | RAD50; BRCA2; NBN; MRE11                                |
| 1269811__REACTOME__R-<br>HSA-68875                | Mitotic Prophase                                               | 7 | 11.17 | 2.65E-06 | 1.32E-04 | SEH1L; MCPH1; NUP188; NUP35; NUP50; NCAPD3; NUP210      |
| 1269698__REACTOME__R-<br>HSA-159231               | Transport of Mature mRNA Derived from an Intronless Transcript | 5 | 21.60 | 2.71E-06 | 1.33E-04 | SEH1L; NUP188; NUP35; NUP50; NUP210                     |
| 1269130__REACTOME__R-<br>HSA-168253               | Host Interactions with Influenza Factors                       | 5 | 20.74 | 3.36E-06 | 1.57E-04 | SEH1L; NUP188; NUP35; NUP50; NUP210                     |
| 1269921__REACTOME__R-<br>HSA-70153                | Glucose transport                                              | 5 | 20.74 | 3.36E-06 | 1.57E-04 | SEH1L; NUP188; NUP35; NUP50; NUP210                     |
| 1269695__REACTOME__R-<br>HSA-159234               | Transport of Mature mRNAs Derived from Intronless Transcripts  | 5 | 20.74 | 3.36E-06 | 1.57E-04 | SEH1L; NUP188; NUP35; NUP50; NUP210                     |
| 455__KEGG__ko03450;<br>83047__KEGG__hsa03450      | Non-homologous end-joining                                     | 4 | 34.57 | 3.75E-06 | 1.73E-04 | POLM; RAD50; FEN1; MRE11                                |
| 1269058__REACTOME__R-<br>HSA-162587               | HIV Life Cycle                                                 | 8 | 8.38  | 4.43E-06 | 1.98E-04 | SEH1L; NUP188; FEN1; NUP35; NUP50; GTF2H4; NUP210; CDK7 |
| 672450__WikiPathways__<br>WP1971                  | Integrated Cancer Pathway                                      | 5 | 19.20 | 5.03E-06 | 2.22E-04 | PTEN; RAD50; CHEK1; MRE11; CHEK2                        |
| 1270425__REACTOME__R-<br>HSA-3371453              | Regulation of HSF1-mediated heat shock response                | 6 | 13.24 | 5.22E-06 | 2.27E-04 | SIRT1; SEH1L; NUP188; NUP35; NUP50; NUP210              |

|                                                          |                                                             |    |       |          |          |                                                                           |
|----------------------------------------------------------|-------------------------------------------------------------|----|-------|----------|----------|---------------------------------------------------------------------------|
| 1269117__REACTOME__R-<br>HSA-168325                      | Viral Messenger RNA Synthesis                               | 5  | 18.52 | 6.08E-06 | 2.54E-04 | SEH1L; NUP188; NUP35; NUP50; NUP210                                       |
| 1269920__REACTOME__R-<br>HSA-189200                      | Hexose transport                                            | 5  | 18.52 | 6.08E-06 | 2.54E-04 | SEH1L; NUP188; NUP35; NUP50; NUP210                                       |
| 1383076__REACTOME__R-<br>HSA-5633007                     | Regulation of TP53 Activity                                 | 8  | 7.83  | 7.40E-06 | 3.04E-04 | RAD17; MRE11; AURKB; CHEK1; RAD50; RAD9A; NBN; CHEK2                      |
| 1269731__REACTOME__R-<br>HSA-194441;                     | Metabolism of non-coding RNA; snRNP Assembly                | 5  | 16.73 | 1.03E-05 | 4.12E-04 | SEH1L; NUP188; NUP35; NUP50; NUP210                                       |
| 1269732__REACTOME__R-<br>HSA-191859                      |                                                             |    |       |          |          |                                                                           |
| 1309089__REACTOME__R-<br>HSA-6784531                     | tRNA processing in the nucleus                              | 5  | 16.20 | 1.21E-05 | 4.78E-04 | SEH1L; NUP188; NUP35; NUP50; NUP210                                       |
| 711360__WikiPathways__<br>WP2377                         | Integrated Pancreatic Cancer Pathway                        | 8  | 7.09  | 1.54E-05 | 6.00E-04 | PTEN; SIRT1; MRE11; GADD45A; CHEK1; RAD50; BRCA2; CHEK2                   |
| 1269815__REACTOME__R-<br>HSA-2980766                     | Nuclear Envelope Breakdown                                  | 5  | 15.25 | 1.65E-05 | 6.35E-04 | SEH1L; NUP188; NUP35; NUP50; NUP210                                       |
| 1309097__REACTOME__R-<br>HSA-5693548                     | Sensing of DNA Double Strand Breaks                         | 3  | 51.85 | 1.69E-05 | 6.37E-04 | RAD50; NBN; MRE11                                                         |
| 1458264__WikiPathways__<br>WP2942                        | DDX1 as a regulatory component of the Drosha microprocessor | 3  | 51.85 | 1.69E-05 | 6.37E-04 | RAD50; NBN; MRE11                                                         |
| 1269723__REACTOME__R-<br>HSA-5578749                     | Transcriptional regulation by small RNAs                    | 5  | 14.81 | 1.91E-05 | 7.00E-04 | SEH1L; NUP188; NUP35; NUP50; NUP210                                       |
| 1269069__REACTOME__R-<br>HSA-162599                      | Late Phase of HIV Life Cycle                                | 7  | 8.16  | 2.18E-05 | 7.90E-04 | SEH1L; NUP188; NUP35; NUP50; GTF2H4; NUP210; CDK7                         |
| 1270421__REACTOME__R-<br>HSA-3371556                     | Cellular response to heat stress                            | 6  | 10.20 | 2.43E-05 | 8.71E-04 | SIRT1; SEH1L; NUP188; NUP35; NUP50; NUP210                                |
| 1269810__REACTOME__R-<br>HSA-68886                       | M Phase                                                     | 9  | 5.43  | 3.78E-05 | 1.34E-03 | NUP35; NUP50; NCAPD3; NUP210; AURKB; NUP188; MCPH1; SEH1L; PDS5A          |
| 1270414__REACTOME__R-<br>HSA-2262752                     | Cellular responses to stress                                | 11 | 4.35  | 3.86E-05 | 1.35E-03 | SIRT1; NUP35; NUP50; MRE11; NUP210; CBX8; RAD50; SEH1L; NUP188; NBN; FZR1 |
| 137959__Pathway<br>Interaction<br>Database__bard1pathway | BARD1 signaling events                                      | 4  | 19.75 | 4.24E-05 | 1.47E-03 | RAD50; NBN; MRE11; FANCG                                                  |

|                                  |                                                                        |    |        |          |          |                                                                                                                                                                    |
|----------------------------------|------------------------------------------------------------------------|----|--------|----------|----------|--------------------------------------------------------------------------------------------------------------------------------------------------------------------|
| 413428__KEGG_hsa_M00295;         | BRCA1-associated genome surveillance complex (BASC)                    | 3  | 38.89  | 4.67E-05 | 1.60E-03 | RAD50; NBN; MRE11                                                                                                                                                  |
| 890555__KEGG_M00295              |                                                                        |    |        |          |          |                                                                                                                                                                    |
| 1269694__REACTOME_R-HSA-159236   | Transport of Mature mRNA derived from an Intron-Containing Transcript  | 5  | 11.52  | 6.65E-05 | 2.23E-03 | SEH1L; NUP188; NUP35; NUP50; NUP210                                                                                                                                |
| 1269719__REACTOME_R-HSA-211000   | Gene Silencing by RNA                                                  | 5  | 11.03  | 8.22E-05 | 2.73E-03 | SEH1L; NUP188; NUP35; NUP50; NUP210                                                                                                                                |
| 1269316__REACTOME_R-HSA-1169410; | Antiviral mechanism by IFN-stimulated genes; ISG15 antiviral mechanism | 5  | 10.80  | 9.11E-05 | 2.98E-03 | SEH1L; NUP188; NUP35; NUP50; NUP210                                                                                                                                |
| 1269317__REACTOME_R-HSA-1169408  |                                                                        |    |        |          |          |                                                                                                                                                                    |
| 413422__KEGG_hsa_M00286;         | GIN5 complex                                                           | 2  | 103.70 | 9.19E-05 | 2.98E-03 | GIN54; GIN52                                                                                                                                                       |
| 890548__KEGG_M00286              |                                                                        |    |        |          |          |                                                                                                                                                                    |
| 1269649__REACTOME_R-HSA-74160    | Gene Expression                                                        | 23 | 2.25   | 1.13E-04 | 3.61E-03 | NUP35; MRE11; NUP210; AURKB; GADD45A; RAD50; RAD9A; AQR; PTEN; SIRT1; NCOA6; RAD17; NUP50; CDK7; CHEK1; SEH1L; NUP188; MTA1; SUV39H1; NBN; GTF2H4; TNKS1BP1; CHEK2 |
| 1269693__REACTOME_R-HSA-72202    | Transport of Mature Transcript to Cytoplasm                            | 5  | 10.17  | 1.22E-04 | 3.85E-03 | SEH1L; NUP188; NUP35; NUP50; NUP210                                                                                                                                |
| 1269650__REACTOME_R-HSA-212436   | Generic Transcription Pathway                                          | 14 | 3.11   | 1.30E-04 | 4.05E-03 | PTEN; NCOA6; RAD17; MRE11; CDK7; AURKB; GADD45A; RAD50; CHEK1; RAD9A; NBN; GTF2H4; TNKS1BP1; CHEK2                                                                 |
| 1269057__REACTOME_R-HSA-162906   | HIV Infection                                                          | 8  | 5.22   | 1.38E-04 | 4.25E-03 | SEH1L; NUP188; FEN1; NUP35; NUP50; GTF2H4; NUP210; CDK7                                                                                                            |
| 1269777__REACTOME_R-HSA-69242    | S Phase                                                                | 6  | 7.32   | 1.59E-04 | 4.86E-03 | GIN54; FEN1; FZR1; PDS5A; CDK7; GIN52                                                                                                                              |
| 1309088__REACTOME_R-HSA-72306    | tRNA processing                                                        | 5  | 8.79   | 2.45E-04 | 7.42E-03 | SEH1L; NUP188; NUP35; NUP50; NUP210                                                                                                                                |
| 1269734__REACTOME_R-HSA-212165   | Epigenetic regulation of gene expression                               | 5  | 8.64   | 2.65E-04 | 7.95E-03 | SIRT1; MTA1; SUV39H1; GTF2H4; CDK7                                                                                                                                 |
| 1268701__REACTOME_R-HSA-597592   | Post-translational protein modification                                | 15 | 2.68   | 3.75E-04 | 1.11E-02 | PTEN; RNF168; WDR48; NUP35; TOP2B; NUP50; NUP210; AURKB; NSMCE1; CBX8; SEH1L; MTA1; NUP188; NSMCE3; UCHL5                                                          |
| 1269737__REACTOME_R-HSA-5250941  | Negative epigenetic regulation of rRNA expression                      | 4  | 10.92  | 4.62E-04 | 1.36E-02 | SIRT1; SUV39H1; GTF2H4; CDK7                                                                                                                                       |

|                                                               |                                                     |   |       |          |          |                                   |
|---------------------------------------------------------------|-----------------------------------------------------|---|-------|----------|----------|-----------------------------------|
| 413476__KEGG_hsa_M00413;<br>890628__KEGG_M00413               | FA core complex                                     | 2 | 51.85 | 5.44E-04 | 1.58E-02 | FAAP24; FANCG                     |
| 1269784__REACTOME_R-<br>HSA-69190                             | DNA strand elongation                               | 3 | 16.37 | 7.49E-04 | 2.16E-02 | GIN54; FEN1; GINS2                |
| 1309121__REACTOME_R-<br>HSA-6783310                           | Fanconi Anemia Pathway                              | 3 | 15.56 | 8.75E-04 | 2.50E-02 | FAAP24; FANCG; MUS81              |
| 465__KEGG_ko04115;<br>83055__KEGG_hsa04115                    | p53 signaling pathway                               | 4 | 9.22  | 8.85E-04 | 2.51E-02 | PTEN; CHEK1; CHEK2; GADD45A       |
| 1084767__KEGG_hsa_M00691;<br>1108230__KEGG_M00691             | DNA damage-induced cell cycle checkpoints           | 2 | 41.48 | 9.01E-04 | 2.53E-02 | CHEK1; CHEK2                      |
| 463__KEGG_ko04110;<br>83054__KEGG_hsa04110                    | Cell cycle                                          | 5 | 6.48  | 1.01E-03 | 2.80E-02 | CHEK1; FZR1; CDK7; CHEK2; GADD45A |
| 137987__Pathway<br>Interaction<br>Database__telomerasepathway | Regulation of Telomerase                            | 4 | 8.83  | 1.05E-03 | 2.88E-02 | RAD50; RAD9A; NBN; MRE11          |
| 137935__Pathway<br>Interaction<br>Database__foxm1pathway      | FOX M1 transcription factor network                 | 3 | 13.53 | 1.33E-03 | 3.64E-02 | BRCA2; CHEK2; AURKB               |
| 1270429__REACTOME_R-<br>HSA-2559586                           | DNA Damage/Telomere Stress Induced Senescence       | 3 | 12.96 | 1.51E-03 | 4.05E-02 | RAD50; NBN; MRE11                 |
| 1269757__REACTOME_R-<br>HSA-176187                            | Activation of ATR in response to replication stress | 3 | 12.96 | 1.51E-03 | 4.05E-02 | CHEK1; RAD9A; RAD17               |
| 137925__Pathway<br>Interaction<br>Database__aurora_a_pathway  | Aurora A signaling                                  | 3 | 12.44 | 1.71E-03 | 4.54E-02 | FZR1; AURKB; GADD45A              |
| 413425__KEGG_hsa_M00290;<br>890551__KEGG_M00290               | Holo-TFIIH complex                                  | 2 | 29.63 | 1.87E-03 | 4.85E-02 | GTF2H4; CDK7                      |

|                         |                            |   |       |          |          |              |
|-------------------------|----------------------------|---|-------|----------|----------|--------------|
| 198895__WikiPathways__  | Non-homologous end joining | 2 | 29.63 | 1.87E-03 | 4.85E-02 | RAD50; MRE11 |
| WP438                   |                            |   |       |          |          |              |
| 1458190__WikiPathways__ | ATR Signaling              | 2 | 29.63 | 1.87E-03 | 4.85E-02 | CHEK1; RAD9A |
| WP3875                  |                            |   |       |          |          |              |
